# Supplementary material for: Targeting AKT and CK2 represents a novel therapeutic strategy for SMO constitutive activation‐driven medulloblastoma
Source: PubMed Central journal article supplement (PMC9160449; doi:10.1111/cns.13835), 2022-04-14
Supplement: CNS-28-1033-s001.pdf [file CNS-28-1033-s001.pdf]

| Dataset 1. FPKM value (>=1) of RNA-sequencing result using ONS76 cells stably expressing wild-type SMO or W535L mutant SMO with treatment of |             |             |             |             |          |          |           |           |
|----------------------------------------------------------------------------------------------------------------------------------------------|-------------|-------------|-------------|-------------|----------|----------|-----------|-----------|
| Gene Symbol                                                                                                                                  | W535L/LDE-1 | W535L/LDE-2 | W535L/DMSO- | W535L/DMSO- | WT/LDE-1 | WT/LDE-2 | WT/DMSO-1 | WT/DMSO-2 |
| CDKL3                                                                                                                                        | 1.19        | 1.32        | 1.61        | 1.36        | 1.27     | 1        | 1.62      | 1.66      |
| CCT6B                                                                                                                                        | 2           | 1.65        | 1.71        | 1.68        | 1.5      | 1.01     | 1.65      | 1.12      |
| C11orf45                                                                                                                                     | 1.33        | 1.08        | 1.52        | 1.27        | 1.34     | 1.01     | 1.32      | 1.26      |
| C14orf132                                                                                                                                    | 1.22        | 1.32        | 1.23        | 1.09        | 1.15     | 1.02     | 1.28      | 1.12      |
| ZNF836                                                                                                                                       | 1.01        | 1.14        | 1.11        | 1.17        | 1.16     | 1.02     | 1.45      | 1.31      |
| CFHR3                                                                                                                                        | 1.28        | 1.39        | 1.76        | 1.54        | 1.41     | 1.02     | 2.36      | 1.55      |
| ZNF470                                                                                                                                       | 1.07        | 1.06        | 1.25        | 1.54        | 1.02     | 1.04     | 1.86      | 1.64      |
| DUSP10                                                                                                                                       | 1.27        | 1.09        | 1.4         | 1.84        | 1.61     | 1.04     | 1.37      | 1.66      |
| ONECUT2                                                                                                                                      | 1.13        | 1.22        | 1.01        | 1.46        | 1.11     | 1.05     | 1.27      | 1.35      |
| APOL6                                                                                                                                        | 1.19        | 1.28        | 1.39        | 1.54        | 1.13     | 1.05     | 1.53      | 1.35      |
| METTL10                                                                                                                                      | 1.41        | 1.4         | 1.51        | 1.32        | 1.2      | 1.05     | 1.54      | 1.37      |
| LOC107984974                                                                                                                                 | 1.44        | 1.33        | 1.36        | 1.22        | 1.5      | 1.07     | 1.48      | 1.23      |
| ZNF813                                                                                                                                       | 1.09        | 1.11        | 1.11        | 1.29        | 1.27     | 1.07     | 2.05      | 1.75      |
| LIN54                                                                                                                                        | 1.18        | 1           | 1.38        | 1.58        | 1.27     | 1.07     | 2.03      | 1.87      |
| GALNT4                                                                                                                                       | 1.12        | 1.31        | 1.03        | 1.72        | 1.32     | 1.08     | 2.02      | 1.51      |
| LOC107985246                                                                                                                                 | 1.6         | 1.65        | 1.75        | 1.45        | 1.09     | 1.09     | 1.35      | 1.6       |
| KCTD6                                                                                                                                        | 2.38        | 1.99        | 2.12        | 1.83        | 1.09     | 1.09     | 1.35      | 1.71      |
| DNAJC6                                                                                                                                       | 1.19        | 1.26        | 1.64        | 1.47        | 1.12     | 1.1      | 1.48      | 1.41      |
| FHDC1                                                                                                                                        | 1.33        | 1.18        | 1.15        | 1.29        | 1.16     | 1.11     | 1.16      | 1.08      |
| MTUS1                                                                                                                                        | 1.13        | 1.09        | 1.22        | 1.79        | 1.2      | 1.11     | 1.89      | 1.31      |
| APOL4                                                                                                                                        | 1.29        | 1.15        | 1.24        | 1.29        | 1.29     | 1.11     | 1.79      | 1.74      |
| PRSS27                                                                                                                                       | 1.65        | 1.45        | 1.48        | 1.49        | 1.1      | 1.12     | 1.48      | 1.16      |
| ZIC1                                                                                                                                         | 1.27        | 1.2         | 1.25        | 1.74        | 1.21     | 1.12     | 1.45      | 1.17      |
| PSTPIP1                                                                                                                                      | 1.4         | 1.32        | 1.03        | 1.04        | 1.23     | 1.12     | 1.35      | 1.25      |
| ZNF484                                                                                                                                       | 1.2         | 1.17        | 1.54        | 1.59        | 1.23     | 1.12     | 1.82      | 1.38      |
| PPP1R3E                                                                                                                                      | 1.33        | 1.06        | 1.37        | 1.21        | 1.31     | 1.12     | 1.78      | 1.42      |
| FGF5                                                                                                                                         | 1.08        | 1.18        | 1.07        | 1.68        | 1.24     | 1.12     | 1.86      | 1.48      |
| DDX60L                                                                                                                                       | 1.72        | 1.74        | 2.34        | 2.72        | 1.09     | 1.12     | 2.39      | 1.79      |
| KCNE5                                                                                                                                        | 1.21        | 1.15        | 1.58        | 1.24        | 1.34     | 1.13     | 1.13      | 1.1       |
| ASIC2                                                                                                                                        | 1.48        | 1.44        | 1.64        | 1.47        | 1.14     | 1.13     | 1.08      | 1.24      |
| CSRNP1                                                                                                                                       | 1.91        | 1.97        | 1.83        | 1.81        | 1.33     | 1.14     | 1.18      | 1.37      |
| RNF125                                                                                                                                       | 1.2         | 1.09        | 1.41        | 1.44        | 1        | 1.14     | 1.48      | 1.53      |
| ZNF614                                                                                                                                       | 1           | 1.41        | 1.21        | 1.27        | 1.09     | 1.14     | 1.73      | 1.61      |
| LOC100996574                                                                                                                                 | 1.39        | 1.13        | 1.05        | 1.33        | 1.53     | 1.15     | 1.18      | 1.23      |
| KDM7A                                                                                                                                        | 1.2         | 1.05        | 1.17        | 1.55        | 1.27     | 1.15     | 2.01      | 1.79      |
| NEDD4                                                                                                                                        | 1.2         | 1.39        | 1.61        | 1.7         | 1.39     | 1.15     | 2.04      | 1.85      |
| LCORL                                                                                                                                        | 1.42        | 1.14        | 1.24        | 1.73        | 1.51     | 1.15     | 2.3       | 2.1       |
| PPP1R1C                                                                                                                                      | 1.07        | 1.14        | 2.01        | 1.3         | 1.16     | 1.16     | 2.02      | 1.07      |
| SLC46A3                                                                                                                                      | 1.44        | 1.36        | 1.46        | 1.36        | 1.46     | 1.17     | 1.15      | 1.45      |
| ZNF184                                                                                                                                       | 1.43        | 1.34        | 1.37        | 1.63        | 1.32     | 1.18     | 1.76      | 1.52      |
| ZNF577                                                                                                                                       | 1.24        | 1.28        | 1.61        | 1.72        | 1.72     | 1.18     | 2.64      | 1.89      |
| ITGB2                                                                                                                                        | 1.69        | 1.48        | 1.49        | 1.66        | 1.04     | 1.19     | 1.01      | 1         |
| MDH1B                                                                                                                                        | 1.16        | 1.47        | 1.7         | 1.77        | 1.05     | 1.19     | 1.69      | 1.56      |
| CADM3                                                                                                                                        | 1.41        | 1.78        | 1.73        | 1.72        | 1.07     | 1.2      | 1.03      | 1.03      |
| PCDH87                                                                                                                                       | 1.78        | 1.66        | 1.88        | 2.04        | 1.16     | 1.2      | 1.23      | 1.31      |
| GDNF                                                                                                                                         | 1.33        | 1.32        | 1.25        | 1.42        | 1.31     | 1.2      | 1.83      | 1.4       |
| TRAM1L1                                                                                                                                      | 1.78        | 1.35        | 1.25        | 1.82        | 1.22     | 1.2      | 2.01      | 1.69      |
| MAMSTR                                                                                                                                       | 1.72        | 1.5         | 1.76        | 1.81        | 1.24     | 1.2      | 1.8       | 1.71      |
| PDE4D                                                                                                                                        | 1.2         | 1.07        | 1.36        | 1.55        | 1.44     | 1.2      | 2.39      | 1.74      |
| OR51B4                                                                                                                                       | 2.25        | 1.5         | 1.88        | 2.63        | 1.47     | 1.2      | 2.36      | 1.75      |
| LOC107987397                                                                                                                                 | 1.05        | 1.14        | 1.54        | 1.27        | 1.22     | 1.2      | 2.09      | 1.96      |
| ODF3L1                                                                                                                                       | 1.66        | 1.79        | 1.51        | 1.42        | 1.77     | 1.21     | 1.3       | 1.34      |
| CDYL2                                                                                                                                        | 1.26        | 1.16        | 1.38        | 1.47        | 1.58     | 1.21     | 1.61      | 1.64      |
| TET2                                                                                                                                         | 1.29        | 1.18        | 1.4         | 1.89        | 1.33     | 1.21     | 2.08      | 1.83      |
| SENP8                                                                                                                                        | 1.49        | 1.85        | 1.6         | 1.57        | 1.25     | 1.21     | 1.87      | 1.97      |
| CNTNAP2                                                                                                                                      | 1.16        | 1.12        | 1.42        | 1.53        | 1.33     | 1.22     | 1.7       | 1.37      |
| GSTM3                                                                                                                                        | 1.26        | 1.4         | 1.29        | 1.4         | 1.01     | 1.22     | 1.35      | 1.38      |
| PGBD2                                                                                                                                        | 1.31        | 1.2         | 1.13        | 1.24        | 1.04     | 1.22     | 1.77      | 1.41      |
| THRB                                                                                                                                         | 1.22        | 1.35        | 1.45        | 1.43        | 1.09     | 1.22     | 1.51      | 1.54      |
| SFMBT2                                                                                                                                       | 1.06        | 1.16        | 1.21        | 1.52        | 1.21     | 1.22     | 1.74      | 1.55      |
| EPB41L4A                                                                                                                                     | 1.07        | 1.13        | 1.41        | 1.37        | 1.44     | 1.22     | 2.19      | 1.62      |
| FGD6                                                                                                                                         | 1.55        | 1.23        | 1.57        | 2.01        | 1.43     | 1.22     | 2.17      | 1.98      |
| FGD3                                                                                                                                         | 1.21        | 1.62        | 1.53        | 1.2         | 1.25     | 1.23     | 1.12      | 1.12      |
| CALML4                                                                                                                                       | 1.12        | 1.05        | 1.17        | 1.33        | 1.47     | 1.23     | 1.75      | 1.46      |
| ZFHX4                                                                                                                                        | 1.64        | 1.44        | 1.74        | 2.05        | 1.36     | 1.23     | 1.66      | 1.56      |
| LCA5                                                                                                                                         | 1.11        | 1.28        | 1.2         | 1.45        | 1.39     | 1.23     | 1.79      | 1.56      |
| RBM47                                                                                                                                        | 1.22        | 1.28        | 1.38        | 1.22        | 1.45     | 1.23     | 1.38      | 1.63      |
| MTCP1                                                                                                                                        | 1.01        | 1.23        | 1           | 1.1         | 1.11     | 1.23     | 1.36      | 1.65      |
| TBC1D19                                                                                                                                      | 1.26        | 1.37        | 1.55        | 1.64        | 1.19     | 1.23     | 1.75      | 1.8       |
| ZNF665                                                                                                                                       | 1.28        | 1.16        | 1.18        | 1.44        | 1.25     | 1.23     | 1.54      | 1.83      |
| LOC100996716                                                                                                                                 | 1.25        | 1.21        | 1.19        | 1.5         | 1.16     | 1.24     | 1.5       | 1         |
| RCBTB2                                                                                                                                       | 1.29        | 1.22        | 1.43        | 1.63        | 1.22     | 1.24     | 1.58      | 1.48      |
| EMID1                                                                                                                                        | 2.32        | 2.16        | 2.06        | 1.54        | 1.02     | 1.25     | 1.11      | 1.11      |
| SPINK2                                                                                                                                       | 1.55        | 2.41        | 1.58        | 2.24        | 1.53     | 1.25     | 1.42      | 1.26      |
| RAB27A                                                                                                                                       | 1.16        | 1.37        | 1.44        | 1.37        | 1.27     | 1.25     | 1.88      | 1.38      |
| STARD9                                                                                                                                       | 1.18        | 1.17        | 1.24        | 1.37        | 1.24     | 1.25     | 1.62      | 1.5       |
| LZTFL1                                                                                                                                       | 1.51        | 1.23        | 1.51        | 1.69        | 1.4      | 1.25     | 2.73      | 1.94      |
| CAMK1D                                                                                                                                       | 1.21        | 1.35        | 1.06        | 1.12        | 1.26     | 1.26     | 1.53      | 1.16      |
| TIMP4                                                                                                                                        | 2.09        | 1.09        | 1.27        | 1.36        | 1.38     | 1.26     | 1.2       | 1.27      |
| THEMIS2                                                                                                                                      | 2.07        | 3.13        | 2.28        | 2.06        | 1.42     | 1.26     | 1.51      | 1.34      |
| RBMS3                                                                                                                                        | 1.29        | 1.11        | 1.27        | 1.5         | 1.76     | 1.26     | 1.97      | 1.63      |
| PDE3B                                                                                                                                        | 1.01        | 1.25        | 1.28        | 1.99        | 1.56     | 1.26     | 1.99      | 1.88      |

|                    |      |      |      |      |      |      |      |      |
|--------------------|------|------|------|------|------|------|------|------|
| STBD1              | 1.29 | 1.59 | 1.45 | 1.67 | 1.33 | 1.27 | 1.61 | 1.3  |
| ZNF70              | 1.67 | 1.61 | 1.69 | 1.83 | 1.03 | 1.27 | 1.05 | 1.35 |
| MGC57346-<br>CRHR1 | 1.5  | 1.4  | 1.5  | 1.29 | 1.15 | 1.27 | 1.22 | 1.35 |
| PPIL6              | 1.45 | 1.29 | 1.33 | 1.01 | 1.34 | 1.27 | 1.63 | 1.4  |
| IL18BP             | 1.14 | 1.15 | 1.37 | 1.61 | 1.45 | 1.27 | 2.36 | 1.62 |
| ZNF701             | 1.39 | 1.29 | 1.65 | 1.73 | 1.72 | 1.27 | 2.3  | 1.75 |
| MYEF2              | 1.44 | 1.27 | 1.47 | 1.9  | 1.44 | 1.27 | 1.97 | 1.92 |
| ZNF75D             | 1.29 | 1.24 | 1.5  | 1.73 | 1.65 | 1.27 | 2.45 | 2.03 |
| LIN28B             | 1.16 | 1.05 | 1.24 | 1.56 | 1.48 | 1.27 | 2.33 | 2.08 |
| LIG4               | 1.31 | 1.45 | 1.24 | 1.68 | 1.31 | 1.27 | 2.8  | 2.37 |
| C1orf115           | 1.61 | 1.84 | 1.6  | 1.95 | 1.19 | 1.28 | 1.16 | 1.37 |
| RORB               | 1.19 | 1.27 | 1.42 | 1.43 | 1.26 | 1.28 | 1.85 | 1.46 |
| C10orf12           | 1.08 | 1.16 | 1.39 | 1.66 | 1.53 | 1.28 | 2.1  | 1.56 |
| OR1F1              | 1.02 | 1.12 | 1.25 | 1.49 | 1.26 | 1.28 | 2.61 | 1.72 |
| HOXA13             | 1.24 | 1.22 | 1.17 | 1.41 | 1.52 | 1.29 | 1.34 | 1.31 |
| LOC107985856       | 1.36 | 1.41 | 1.07 | 1.65 | 1.22 | 1.29 | 2.46 | 1.43 |
| KLHL4              | 1.19 | 1.11 | 1.32 | 1.41 | 1.31 | 1.29 | 1.74 | 1.65 |
| RC3H1              | 1.02 | 1.11 | 1.1  | 1.61 | 1.17 | 1.29 | 1.85 | 1.7  |
| TRIM46             | 1.43 | 1.42 | 1.32 | 1.64 | 1.31 | 1.29 | 1.85 | 1.78 |
| BEND4              | 1.12 | 1.14 | 1.38 | 1.45 | 1.28 | 1.29 | 1.8  | 1.9  |
| C4B                | 2.02 | 3.16 | 3.47 | 1.98 | 1.78 | 1.29 | 1.86 | 2.24 |
| SPACA6             | 1.2  | 1.48 | 1.68 | 1.53 | 1.23 | 1.3  | 1.44 | 1.31 |
| NEO1               | 1.5  | 1.57 | 1.58 | 1.67 | 1.27 | 1.3  | 1.49 | 1.32 |
| ITGAE              | 1.26 | 1.06 | 1.25 | 1.32 | 1.52 | 1.3  | 1.48 | 1.36 |
| SOSTDC1            | 2.94 | 2.76 | 3.44 | 3.46 | 1.64 | 1.3  | 2.18 | 1.56 |
| SMIM8              | 1.64 | 1.32 | 1.58 | 1.76 | 1.4  | 1.3  | 2.35 | 1.85 |
| MTHFD2L            | 1.13 | 1.42 | 1.69 | 1.63 | 1.89 | 1.3  | 2.11 | 1.93 |
| MEF2C              | 1.54 | 1.55 | 1.72 | 1.96 | 1.48 | 1.3  | 1.65 | 1.97 |
| REL                | 1.27 | 1.18 | 1.43 | 1.77 | 1.35 | 1.3  | 2.72 | 2.1  |
| C5                 | 1.14 | 1.19 | 1.32 | 1.62 | 1.38 | 1.31 | 1.99 | 1.17 |
| GRAMD1B            | 1.26 | 1.23 | 1.06 | 1.41 | 1.22 | 1.31 | 1.47 | 1.26 |
| PRDM10             | 1.16 | 1.07 | 1.24 | 1.36 | 1.29 | 1.31 | 1.8  | 1.47 |
| FAM13A             | 1.27 | 1.2  | 1.47 | 1.54 | 1.35 | 1.31 | 1.87 | 1.57 |
| METTL25            | 1.43 | 1.21 | 1.04 | 1.18 | 1.62 | 1.31 | 1.95 | 1.63 |
| BARD1              | 1.54 | 1.94 | 1.9  | 2.04 | 1.4  | 1.31 | 2.49 | 1.95 |
| KIF27              | 1.45 | 1.1  | 1.72 | 2.03 | 1.6  | 1.31 | 3.01 | 2.09 |
| C17orf100          | 1.14 | 1.55 | 1.17 | 1.04 | 1.68 | 1.32 | 1.06 | 1.53 |
| SOGA3              | 1.01 | 1.06 | 1.12 | 1.52 | 1.32 | 1.32 | 2.15 | 1.8  |
| ZNF652             | 1.3  | 1.21 | 1.38 | 1.76 | 1.47 | 1.32 | 1.81 | 1.89 |
| ZNF224             | 1.36 | 1.07 | 1.37 | 2.03 | 1.4  | 1.32 | 2.68 | 2.34 |
| ZNF543             | 1.02 | 1.37 | 1.27 | 1.64 | 1.31 | 1.33 | 1.49 | 1.44 |
| HCFC2              | 1.43 | 1.21 | 1.39 | 1.55 | 1.52 | 1.33 | 1.88 | 2.05 |
| TARSL2             | 1.22 | 1.25 | 1.38 | 1.84 | 1.38 | 1.33 | 2.01 | 2.08 |
| TYW5               | 1.25 | 1.24 | 1.41 | 1.47 | 1.52 | 1.33 | 2.44 | 2.15 |
| PRX                | 1.58 | 1.76 | 1.61 | 1.53 | 1.41 | 1.34 | 1.1  | 1.29 |
| VASH1              | 1.38 | 1.42 | 1.3  | 1.26 | 1.24 | 1.34 | 1.18 | 1.38 |
| RFTN1              | 1.22 | 1.35 | 1.22 | 1.01 | 1.64 | 1.34 | 1.43 | 1.46 |
| DLC1               | 1.44 | 1.43 | 1.68 | 1.54 | 1.45 | 1.34 | 1.67 | 1.46 |
| N4BP2L1            | 1.51 | 1.47 | 2.04 | 1.89 | 1.66 | 1.34 | 1.77 | 1.89 |
| MKRN3              | 1.24 | 1.21 | 1.58 | 1.53 | 1.59 | 1.34 | 2.34 | 2.05 |
| MGAT5B             | 1.15 | 1.31 | 1.44 | 1    | 1.36 | 1.35 | 1.04 | 1.04 |
| HTRA3              | 1.6  | 1.77 | 1.49 | 1.21 | 1.34 | 1.35 | 1.14 | 1.07 |
| LOC105371763       | 1.84 | 2.07 | 1.68 | 1.64 | 1.11 | 1.35 | 1.62 | 1.24 |
| ARHGAP10           | 1.3  | 1.52 | 1.37 | 1.24 | 1.38 | 1.35 | 1.17 | 1.25 |
| ARPIN              | 1.49 | 1.24 | 1.57 | 1.52 | 1.07 | 1.35 | 1.2  | 1.36 |
| GBP2               | 1.55 | 1.53 | 1.36 | 1.5  | 1.5  | 1.35 | 1.56 | 1.45 |
| RGCC               | 1.1  | 1.1  | 1.46 | 1.35 | 1.84 | 1.35 | 1.25 | 1.48 |
| TBCEL              | 1.03 | 1.08 | 1.15 | 1.31 | 1.21 | 1.35 | 1.56 | 1.49 |
| PDGFRL             | 1.63 | 1.89 | 1.99 | 1.62 | 1.4  | 1.35 | 1.33 | 1.53 |
| RBM20              | 1.19 | 1.25 | 1.27 | 1.36 | 1.38 | 1.35 | 1.58 | 1.53 |
| ZNF718             | 1.41 | 1.4  | 1.49 | 1.54 | 1.05 | 1.35 | 2.02 | 1.63 |
| ZNF30              | 1.28 | 1.15 | 1.76 | 1.93 | 1.37 | 1.35 | 2.16 | 1.63 |
| AP4E1              | 1.34 | 1.18 | 1.51 | 2.05 | 1.95 | 1.35 | 2.38 | 2.25 |
| VWA5A              | 1.96 | 1.96 | 1.86 | 1.58 | 1.27 | 1.36 | 1.38 | 1.42 |
| ZNF611             | 1    | 1.23 | 1.28 | 1.42 | 1.44 | 1.36 | 2.03 | 1.84 |
| VSIG1              | 1.17 | 1.22 | 1.47 | 1.8  | 1.48 | 1.36 | 1.31 | 1.85 |
| SEPSECS            | 1.24 | 1.27 | 1.51 | 1.54 | 1.48 | 1.36 | 2.25 | 1.9  |
| PDIK1L             | 1.37 | 1.26 | 1.5  | 1.78 | 1.47 | 1.36 | 2.25 | 2.08 |
| RASL11A            | 1    | 1.39 | 1.03 | 1.57 | 1.53 | 1.37 | 1.27 | 1.24 |
| NR2F2              | 1.63 | 1.55 | 1.52 | 1.5  | 1.39 | 1.37 | 1.63 | 1.36 |
| FBXO36             | 1.4  | 1.51 | 1.74 | 1.48 | 1.14 | 1.37 | 1.61 | 1.5  |
| CDADC1             | 1.19 | 1.05 | 1.07 | 1.4  | 1.52 | 1.37 | 1.81 | 1.61 |
| LOC107986810       | 1.13 | 1.25 | 1.62 | 1.44 | 1.24 | 1.37 | 2.25 | 1.61 |
| ZNF649             | 1.38 | 1.33 | 1.31 | 1.49 | 1.53 | 1.37 | 1.94 | 1.69 |
| IKZF4              | 1.29 | 1.15 | 1.2  | 1.49 | 1.22 | 1.37 | 1.37 | 1.72 |
| JAK2               | 1.24 | 1.11 | 1.37 | 1.92 | 1.34 | 1.37 | 2.93 | 1.95 |
| INTS6L             | 1.33 | 1.36 | 1.43 | 1.85 | 1.54 | 1.37 | 2.59 | 2.22 |
| KCNG1              | 1.47 | 1.48 | 1.4  | 1.59 | 1.42 | 1.38 | 1.03 | 1.32 |
| SHC4               | 1.34 | 1.35 | 1.63 | 2.02 | 1.49 | 1.38 | 2.2  | 1.62 |
| TMEM81             | 1.21 | 1.43 | 1.17 | 1.8  | 1.82 | 1.38 | 1.72 | 1.65 |
| CPT1B              | 1.7  | 1.41 | 1.46 | 1.76 | 1.81 | 1.38 | 2.41 | 1.81 |

|              |      |      |      |      |      |      |      |      |
|--------------|------|------|------|------|------|------|------|------|
| LOC101929322 | 2.32 | 2.06 | 2.28 | 3.28 | 1.77 | 1.38 | 1.7  | 1.95 |
| PLAG1        | 1.4  | 1.29 | 1.75 | 2.05 | 1.51 | 1.38 | 2.62 | 2.08 |
| HIST1H3E     | 1.58 | 1.81 | 1.92 | 1.85 | 1.72 | 1.38 | 2.36 | 2.49 |
| LOC107987276 | 1.47 | 1.44 | 1.78 | 1.77 | 1.42 | 1.39 | 1.58 | 1.62 |
| ZNF816       | 1.54 | 1.41 | 1.78 | 1.87 | 1.26 | 1.39 | 2.14 | 1.72 |
| ABHD13       | 1.28 | 1.62 | 1.62 | 1.75 | 1.59 | 1.39 | 2.02 | 2.06 |
| GAS2L3       | 1.09 | 1.1  | 1.38 | 1.39 | 1.56 | 1.39 | 2.07 | 2.19 |
| KDM8         | 1.74 | 1.66 | 1.45 | 1.47 | 1.3  | 1.4  | 1.43 | 1    |
| CDNF         | 1.7  | 1.49 | 1.63 | 1.65 | 1.4  | 1.4  | 1.54 | 1.04 |
| TRANK1       | 2.01 | 2    | 1.92 | 1.99 | 1.4  | 1.4  | 1.67 | 1.33 |
| GBP1         | 1.63 | 1.66 | 1.56 | 2.31 | 1.41 | 1.4  | 2.37 | 1.71 |
| ZBTB10       | 1.21 | 1.17 | 1.4  | 1.47 | 1.61 | 1.4  | 2.22 | 1.84 |
| ZNF25        | 1.45 | 1.24 | 1.66 | 1.74 | 1.35 | 1.4  | 2.45 | 1.96 |
| RFESD        | 1.24 | 1.26 | 1.85 | 1.35 | 1.7  | 1.4  | 1.96 | 2.03 |
| DMXL2        | 1.03 | 1.01 | 1.31 | 1.53 | 1.27 | 1.4  | 2.45 | 2.15 |
| RBP5         | 1.75 | 1.21 | 1.67 | 2.09 | 1.84 | 1.4  | 2.25 | 2.46 |
| ZIK1         | 1.2  | 1.39 | 1.29 | 1.42 | 1.24 | 1.41 | 1.42 | 1.22 |
| GFOD1        | 1.49 | 1.3  | 1.37 | 1.49 | 1.31 | 1.41 | 1.69 | 1.54 |
| ADAMTS15     | 1.45 | 1.54 | 1.31 | 1.24 | 1.44 | 1.41 | 1.28 | 1.55 |
| ZNF234       | 1.16 | 1.06 | 1.09 | 1.35 | 1.76 | 1.41 | 2.49 | 1.71 |
| SDPR         | 1.49 | 1.25 | 1.49 | 1.48 | 1.51 | 1.41 | 1.96 | 1.75 |
| ABHD5        | 1.18 | 1.28 | 1.55 | 1.85 | 1.66 | 1.41 | 2.37 | 1.77 |
| LURAP1       | 2.03 | 1.5  | 1.51 | 1.61 | 1.77 | 1.41 | 1.54 | 1.91 |
| ESR1         | 1.26 | 1    | 1.17 | 1.64 | 1.32 | 1.41 | 2.23 | 2.06 |
| TTL7         | 1.05 | 1.04 | 1.51 | 1.47 | 1.24 | 1.41 | 3.07 | 2.44 |
| ABCA13       | 1.13 | 1.26 | 1.46 | 1.97 | 1.34 | 1.41 | 2.63 | 2.48 |
| FAM167B      | 2.37 | 1.86 | 1.65 | 1.95 | 1.68 | 1.42 | 1.83 | 1.35 |
| AGER         | 1.71 | 1.55 | 1.29 | 1.43 | 1.67 | 1.42 | 1.43 | 1.78 |
| ARHGEF9      | 1.22 | 1.35 | 1.52 | 1.81 | 1.51 | 1.42 | 2.17 | 1.9  |
| MCOLN3       | 1.26 | 1.44 | 1.72 | 1.46 | 1.48 | 1.42 | 2.99 | 2.13 |
| DAAM1        | 1.5  | 1.4  | 1.63 | 2.16 | 1.52 | 1.42 | 2.3  | 2.15 |
| CRYBG3       | 1.44 | 1.37 | 1.67 | 2.47 | 1.43 | 1.42 | 2.99 | 2.52 |
| AHRR         | 1.38 | 1.23 | 1.38 | 1.3  | 1.35 | 1.43 | 1.64 | 1.23 |
| LYRM9        | 1.38 | 1.3  | 1.32 | 1.31 | 1.14 | 1.43 | 1.18 | 1.46 |
| ZNF443       | 1.28 | 1.2  | 1.46 | 1.65 | 1.21 | 1.43 | 2.16 | 1.52 |
| POU3F2       | 1.25 | 1.13 | 1.32 | 1.3  | 1.45 | 1.43 | 1.65 | 1.53 |
| PCDHGB7      | 1.33 | 1.86 | 1.66 | 1.66 | 1.47 | 1.43 | 1.58 | 1.56 |
| KIAA1456     | 1.61 | 1.59 | 1.8  | 1.91 | 1.5  | 1.43 | 1.93 | 1.62 |
| SLC44A3      | 1.7  | 2.13 | 1.87 | 1.99 | 1.71 | 1.43 | 2.04 | 1.76 |
| ZNF2         | 1.86 | 1.48 | 1.54 | 1.63 | 1.6  | 1.43 | 1.72 | 1.79 |
| ST3GAL6      | 1.59 | 1.56 | 1.53 | 1.7  | 1.79 | 1.43 | 2.48 | 2.35 |
| CXCL10       | 3.19 | 3.92 | 2.99 | 3.14 | 1.64 | 1.44 | 2.53 | 1.02 |
| FAM189A2     | 1.47 | 1.71 | 1.79 | 1.79 | 1.56 | 1.44 | 1.51 | 1.32 |
| SCUBE3       | 1.94 | 2.1  | 1.78 | 2.04 | 1.23 | 1.44 | 1.33 | 1.48 |
| SLC29A4      | 1.9  | 2.26 | 2.37 | 1.53 | 1.17 | 1.44 | 1    | 1.53 |
| FBXL13       | 1.62 | 1.25 | 1.43 | 1.82 | 1.76 | 1.44 | 2.7  | 1.54 |
| RNF152       | 1.33 | 1.12 | 1.68 | 1.77 | 1.72 | 1.44 | 2.3  | 1.66 |
| ZDHHC23      | 1.72 | 1.3  | 1.65 | 1.95 | 1.58 | 1.44 | 2.23 | 1.96 |
| KLHL8        | 1.63 | 1.33 | 1.56 | 1.98 | 1.74 | 1.44 | 2.19 | 2.04 |
| ENO3         | 1.32 | 1.07 | 1.12 | 1.36 | 1.02 | 1.45 | 1.44 | 1.09 |
| ANKRD37      | 1.89 | 1.87 | 1.96 | 1.8  | 1.82 | 1.45 | 1.36 | 1.49 |
| LOXL3        | 1.69 | 2.44 | 1.93 | 1.86 | 1.23 | 1.45 | 1.49 | 1.49 |
| LOC728485    | 1.19 | 1.93 | 1.26 | 1.32 | 1.33 | 1.45 | 1.38 | 1.52 |
| RARB         | 1.46 | 1.31 | 1.3  | 1.7  | 1.37 | 1.45 | 1.67 | 1.67 |
| PPP1R9A      | 1.33 | 1.47 | 1.75 | 2.1  | 1.49 | 1.45 | 2.46 | 2.1  |
| ZNF354B      | 1.46 | 1.33 | 1.26 | 1.95 | 1.31 | 1.45 | 2.79 | 2.46 |
| QRFPR        | 1.25 | 1.41 | 1.4  | 1.25 | 1.35 | 1.46 | 1.57 | 1.26 |
| ZNF557       | 1.13 | 1.13 | 1.07 | 1.19 | 1.18 | 1.46 | 1.41 | 1.47 |
| ZNF367       | 1.58 | 1.41 | 1.66 | 2.21 | 1.4  | 1.46 | 2.21 | 1.67 |
| SATB2        | 1.21 | 1.12 | 1.46 | 1.74 | 1.52 | 1.46 | 1.7  | 1.73 |
| POMK         | 1.15 | 1.56 | 1.17 | 1.81 | 1.75 | 1.46 | 1.08 | 1.75 |
| INCA1        | 1.56 | 1.98 | 1.63 | 1.85 | 2.2  | 1.46 | 1.87 | 1.84 |
| ZNF749       | 1.96 | 1.69 | 2.23 | 2.06 | 1.85 | 1.46 | 1.94 | 2.05 |
| OTUD3        | 1.38 | 1.16 | 1.31 | 1.81 | 1.41 | 1.46 | 2.21 | 2.06 |
| HIST2H2BF    | 2.74 | 1.17 | 1.83 | 1.6  | 1.03 | 1.46 | 1.43 | 2.82 |
| MX2          | 4.25 | 4.23 | 4.91 | 4.79 | 1.12 | 1.47 | 1.86 | 1.15 |
| LRRC73       | 1.63 | 1.93 | 1.63 | 1.58 | 1.52 | 1.47 | 1.31 | 1.31 |
| VWA5B2       | 1.45 | 1.36 | 1.4  | 1.45 | 1.74 | 1.47 | 1.58 | 1.31 |
| ARHGAP24     | 1.76 | 2.07 | 1.83 | 1.96 | 1.37 | 1.47 | 2.24 | 1.69 |
| DIXDC1       | 1.16 | 1.37 | 1.39 | 1.36 | 1.65 | 1.47 | 1.62 | 1.7  |
| ZNF778       | 1.47 | 1.67 | 1.62 | 1.7  | 1.41 | 1.47 | 1.87 | 1.78 |
| ZNF45        | 1.63 | 1.55 | 1.57 | 2.01 | 1.7  | 1.47 | 1.86 | 1.83 |
| ZNF347       | 1.31 | 1.29 | 1.45 | 2.02 | 1.21 | 1.47 | 1.97 | 2.04 |
| CENPC        | 1.09 | 1.19 | 1.58 | 1.37 | 1.5  | 1.47 | 2.54 | 2.1  |
| RAB30        | 1.56 | 1.37 | 1.76 | 2.06 | 1.58 | 1.47 | 2.16 | 2.17 |
| MAP3K2       | 1.43 | 1.29 | 1.67 | 1.99 | 1.71 | 1.47 | 2.89 | 2.43 |
| NPIPA2       | 1.19 | 1.98 | 2.35 | 2.49 | 3.72 | 1.47 | 3.79 | 3.63 |
| SOWAHB       | 1.92 | 1.67 | 1.8  | 1.62 | 1.71 | 1.48 | 1.19 | 1.19 |
| NAGS         | 2.25 | 1.68 | 2.13 | 1.7  | 1.77 | 1.48 | 1.32 | 1.51 |
| BMP2K        | 1.44 | 1    | 1.44 | 1.68 | 1.5  | 1.48 | 2.14 | 1.63 |
| OXT2         | 1.59 | 2.83 | 1.83 | 1.79 | 1.59 | 1.48 | 1.52 | 1.67 |
| NPR3         | 1.89 | 2.07 | 2.13 | 2.13 | 1.39 | 1.48 | 1.85 | 1.69 |

|              |      |      |      |      |      |      |      |      |
|--------------|------|------|------|------|------|------|------|------|
| ANKRD45      | 1.51 | 1.67 | 2.06 | 2.18 | 1.67 | 1.48 | 1.6  | 1.84 |
| TRPS1        | 1.25 | 1.19 | 1.59 | 1.6  | 1.56 | 1.48 | 2.23 | 1.84 |
| ZFP82        | 1.27 | 1.54 | 1.64 | 1.89 | 1.5  | 1.48 | 2.33 | 1.89 |
| KLHL11       | 1.38 | 1.31 | 1.54 | 1.81 | 1.69 | 1.48 | 1.75 | 1.99 |
| SLC35A1      | 1.68 | 1.3  | 1.76 | 1.7  | 1.51 | 1.48 | 2.48 | 1.99 |
| ZNF41        | 1.61 | 1.31 | 1.7  | 1.84 | 1.7  | 1.48 | 2.2  | 2.2  |
| ALG10B       | 1.16 | 1.13 | 1.15 | 1.53 | 1.38 | 1.48 | 2.62 | 2.24 |
| ZNF26        | 1.29 | 1.43 | 1.88 | 2.17 | 1.62 | 1.48 | 2.53 | 2.48 |
| USP53        | 1.25 | 1.04 | 1.51 | 1.93 | 1.48 | 1.48 | 2.67 | 2.53 |
| HPSE         | 1.96 | 1.64 | 2.26 | 1.76 | 1.52 | 1.49 | 2.18 | 1.5  |
| NRIP3        | 1.55 | 1.69 | 1.43 | 1.46 | 1.64 | 1.49 | 1.52 | 1.73 |
| LCOR         | 1.24 | 1.07 | 1.44 | 1.91 | 1.52 | 1.49 | 2.53 | 2.11 |
| TRIM59       | 1.39 | 1.32 | 1.35 | 1.92 | 1.54 | 1.49 | 2.87 | 2.39 |
| HHIPL2       | 1.51 | 1.32 | 1.9  | 2.35 | 1.32 | 1.49 | 2.68 | 2.71 |
| GYPC         | 2.1  | 1.98 | 1.83 | 1.41 | 1.19 | 1.5  | 1.17 | 1.25 |
| CASZ1        | 1.43 | 1.47 | 1.49 | 1.29 | 1.47 | 1.5  | 1.1  | 1.59 |
| SETBP1       | 1.31 | 1.49 | 1.81 | 1.87 | 1.25 | 1.5  | 1.58 | 1.78 |
| ZNF596       | 1.3  | 1.21 | 1.33 | 1.76 | 1.49 | 1.5  | 1.71 | 1.79 |
| PDGFD        | 1.47 | 1.46 | 1.43 | 1.74 | 1.21 | 1.5  | 2.26 | 1.84 |
| RAB42        | 1.68 | 1.13 | 1.42 | 2.08 | 1.47 | 1.5  | 1.66 | 2.23 |
| SLFN12       | 1.29 | 1.17 | 1.51 | 1.77 | 1.57 | 1.5  | 2.73 | 2.33 |
| CPNE5        | 1.87 | 2.21 | 1.66 | 1.79 | 2.14 | 1.51 | 1.57 | 1.3  |
| ZNF792       | 1.7  | 1.92 | 1.72 | 1.95 | 1.55 | 1.51 | 1.35 | 1.33 |
| ZNF132       | 1.18 | 1.21 | 1.37 | 1.14 | 1.06 | 1.51 | 1.75 | 1.34 |
| SRGAP1       | 1.11 | 1.2  | 1.26 | 1.33 | 1.56 | 1.51 | 1.63 | 1.46 |
| SAMD13       | 1.18 | 1.41 | 1.58 | 1.07 | 1.27 | 1.51 | 2.34 | 1.46 |
| GK           | 1.39 | 1.26 | 1.6  | 1.67 | 1.64 | 1.51 | 2.16 | 1.69 |
| LOC107986211 | 1.7  | 1.79 | 1.81 | 1.87 | 1.54 | 1.51 | 1.89 | 1.87 |
| TLE2         | 2.1  | 2.27 | 2.3  | 1.88 | 1.22 | 1.52 | 1.28 | 1.04 |
| DHRS4L2      | 1.76 | 1.57 | 1.78 | 1.49 | 1.37 | 1.52 | 1.01 | 1.19 |
| NUPR2        | 1.94 | 1.49 | 1.42 | 2.06 | 1.59 | 1.52 | 1.17 | 1.49 |
| LHFPL4       | 1.81 | 1.66 | 1.63 | 1.41 | 1.61 | 1.52 | 1.29 | 1.57 |
| RARRES3      | 2.07 | 2.59 | 2.33 | 2.58 | 1.58 | 1.52 | 2.37 | 1.57 |
| ZBTB34       | 1.38 | 1.32 | 1.59 | 1.78 | 1.52 | 1.52 | 2.03 | 1.65 |
| CCL24        | 1.15 | 1.29 | 1.52 | 1.66 | 1.79 | 1.52 | 2.37 | 1.85 |
| CCNE2        | 1.67 | 1.97 | 2    | 2.19 | 2.1  | 1.52 | 2.42 | 1.85 |
| ZNF14        | 1.66 | 1.37 | 2.1  | 2.42 | 1.4  | 1.52 | 3.21 | 2.5  |
| FAM200B      | 1.78 | 1.52 | 1.84 | 2.08 | 1.86 | 1.52 | 2.73 | 2.53 |
| HCAR3        | 2.04 | 1.73 | 1.83 | 1.72 | 1.89 | 1.53 | 1.1  | 1.45 |
| NRG2         | 1.47 | 1.35 | 1.23 | 1.39 | 1.45 | 1.53 | 1.13 | 1.56 |
| CCDC40       | 1.18 | 1.46 | 1.73 | 1.7  | 1.13 | 1.53 | 1.5  | 1.64 |
| IFIH1        | 2.74 | 2.3  | 2.88 | 3.53 | 1.58 | 1.53 | 2.56 | 1.79 |
| SETDB2       | 1.2  | 1.01 | 1.76 | 1.82 | 1.71 | 1.53 | 2.39 | 1.8  |
| GIN1         | 1.55 | 1.44 | 1.24 | 1.67 | 1.66 | 1.53 | 2.22 | 1.84 |
| PRRX1        | 1.75 | 1.7  | 1.92 | 2.42 | 1.81 | 1.53 | 2.58 | 2.1  |
| LOC100506127 | 1.63 | 1.31 | 1.74 | 2.07 | 1.74 | 1.53 | 2.35 | 2.12 |
| FOXD4        | 1.34 | 1.27 | 1.57 | 1.95 | 1.47 | 1.54 | 1.47 | 1.4  |
| STXBP5       | 1.87 | 1.35 | 1.49 | 2.08 | 1.58 | 1.54 | 2.04 | 1.94 |
| MCOLN2       | 1.9  | 1.66 | 1.84 | 2.14 | 2.15 | 1.54 | 3.06 | 2.52 |
| ZNF273       | 1.77 | 1.36 | 2.14 | 1.83 | 2.25 | 1.54 | 2.93 | 3.17 |
| RNF39        | 1.98 | 2.1  | 1.63 | 1.78 | 1.46 | 1.55 | 1.26 | 1.16 |
| ZIC4         | 1.48 | 1.48 | 1.73 | 2.53 | 1.68 | 1.55 | 2.04 | 2.05 |
| PIM1         | 1.84 | 2.13 | 2.14 | 1.76 | 1.77 | 1.55 | 1.63 | 2.2  |
| XAF1         | 1.45 | 1.65 | 2.08 | 2.56 | 1.48 | 1.55 | 2.98 | 2.37 |
| ZNF780B      | 1.24 | 1.21 | 1.73 | 2.19 | 1.55 | 1.55 | 3.04 | 2.51 |
| ZNF780A      | 1.58 | 1.69 | 1.7  | 2.13 | 1.43 | 1.55 | 2.95 | 3.02 |
| KIAA1328     | 1.41 | 1.48 | 1.28 | 1.66 | 1.73 | 1.56 | 1.87 | 1.55 |
| PTPRCAP      | 2.35 | 1.53 | 2.08 | 1.56 | 1.72 | 1.56 | 1.2  | 1.66 |
| TFCP2L1      | 1.76 | 1.93 | 1.76 | 1.68 | 1.4  | 1.56 | 1.42 | 1.66 |
| PRKCE        | 1.43 | 1.38 | 1.39 | 1.77 | 1.46 | 1.56 | 1.67 | 1.69 |
| FAM184A      | 1.25 | 1.32 | 1.54 | 1.73 | 1.26 | 1.56 | 3.07 | 2.04 |
| AQP3         | 1.48 | 1.77 | 1.17 | 1.01 | 1.43 | 1.57 | 1.23 | 1.51 |
| FUT1         | 1.57 | 1.6  | 1.69 | 1.49 | 1.5  | 1.57 | 1.44 | 1.55 |
| SEMA4D       | 1.52 | 1.59 | 1.76 | 1.56 | 1.36 | 1.57 | 1.39 | 1.57 |
| NUTM2A       | 2.33 | 1.81 | 2.01 | 2.07 | 1.78 | 1.57 | 1.88 | 1.7  |
| XDH          | 1.47 | 1.54 | 1.52 | 1.35 | 1.85 | 1.57 | 2.06 | 1.73 |
| ZNF835       | 1.75 | 1.88 | 1.79 | 1.66 | 1.62 | 1.57 | 1.43 | 1.81 |
| MCM9         | 1.33 | 1.25 | 1.78 | 1.61 | 1.86 | 1.57 | 2.12 | 1.83 |
| MFSD8        | 1.37 | 1.37 | 1.48 | 1.85 | 1.57 | 1.57 | 2.56 | 2.27 |
| COL8A2       | 1.77 | 1.33 | 1.53 | 1.49 | 1.19 | 1.58 | 1.28 | 1.31 |
| LOX          | 2.14 | 1.81 | 2.25 | 2.48 | 1.75 | 1.58 | 2.35 | 1.74 |
| FAM129A      | 2.96 | 2.92 | 2.81 | 2.92 | 1.81 | 1.58 | 1.81 | 1.96 |
| PPM1K        | 1.67 | 1.37 | 1.85 | 2.07 | 1.63 | 1.58 | 2.33 | 1.99 |
| METTL4       | 1.45 | 1.11 | 1.81 | 1.63 | 1.89 | 1.58 | 2.66 | 2.32 |
| ATP8A1       | 1.14 | 1.18 | 1.21 | 1.65 | 1.33 | 1.58 | 2.98 | 2.72 |
| CCDC126      | 2.49 | 2.04 | 2.38 | 2.55 | 2.11 | 1.58 | 2.41 | 3.05 |
| TSACC        | 1.16 | 1.61 | 1.19 | 1.4  | 1.51 | 1.59 | 1.46 | 1.5  |
| ZNF35        | 1.77 | 1.35 | 1.45 | 1.79 | 1.36 | 1.59 | 1.63 | 1.5  |
| PCDH18       | 1.62 | 2.13 | 2.28 | 2.34 | 1.58 | 1.59 | 1.82 | 1.54 |
| LOC101927789 | 2.4  | 1.97 | 2.64 | 1.91 | 1.52 | 1.59 | 2.41 | 1.6  |
| KIAA1614     | 1.61 | 1.7  | 1.69 | 1.58 | 1.43 | 1.59 | 1.54 | 1.79 |
| CCDC171      | 1.39 | 1.6  | 1.56 | 1.97 | 1.44 | 1.59 | 2.43 | 1.86 |
| RAET1G       | 1.94 | 1.87 | 1.94 | 1.68 | 1.98 | 1.59 | 1.77 | 1.89 |
| ZNF264       | 1.92 | 1.75 | 1.64 | 2.17 | 2    | 1.59 | 1.91 | 2    |
| CEP162       | 1.37 | 1.78 | 1.71 | 1.8  | 1.44 | 1.59 | 3.13 | 2.19 |
| FMN1         | 1.34 | 1.3  | 1.49 | 2.13 | 1.67 | 1.59 | 2.61 | 2.24 |

|                |      |      |      |      |      |      |      |      |
|----------------|------|------|------|------|------|------|------|------|
| AGAP5          | 1.98 | 1.29 | 1.88 | 1.58 | 1.7  | 1.59 | 2.41 | 2.26 |
| P2RY1          | 1.78 | 1.39 | 1.71 | 2.34 | 1.35 | 1.59 | 2.22 | 2.27 |
| NBEAL1         | 1.27 | 1.34 | 1.39 | 1.9  | 1.42 | 1.59 | 3.01 | 2.62 |
| ZNF605         | 1.66 | 1.54 | 2    | 2.48 | 1.82 | 1.59 | 3.61 | 3.08 |
| GXYLT2         | 1.81 | 2.17 | 2.04 | 1.96 | 1.28 | 1.6  | 1.53 | 1.17 |
| ICA1L          | 1.3  | 1.63 | 1.21 | 2.03 | 1.52 | 1.6  | 1.91 | 1.59 |
| CCDC187        | 1.72 | 1.58 | 1.55 | 1.41 | 1.53 | 1.6  | 1.61 | 1.6  |
| P2RX6          | 1.79 | 1.79 | 1.56 | 1.45 | 1.62 | 1.6  | 1.52 | 1.77 |
| ARHGAP32       | 1.53 | 1.48 | 1.66 | 1.83 | 1.64 | 1.6  | 1.94 | 1.92 |
| GPM6B          | 1.4  | 1.39 | 1.72 | 1.74 | 1.59 | 1.6  | 2.5  | 2.08 |
| CLOCK          | 1.33 | 1.32 | 1.51 | 1.99 | 1.74 | 1.6  | 2.56 | 2.34 |
| APC2           | 1.56 | 1.63 | 1.51 | 1.32 | 1.37 | 1.61 | 1.08 | 1.38 |
| TMIGD2         | 1.08 | 1.79 | 1.68 | 2.48 | 2.03 | 1.61 | 2.48 | 1.76 |
| ARID3A         | 2.1  | 2.21 | 2    | 2.61 | 1.58 | 1.61 | 1.79 | 1.89 |
| PBX4           | 1.5  | 1.69 | 1.53 | 1.54 | 1.66 | 1.61 | 1.71 | 1.95 |
| ZNF181         | 1.56 | 1.47 | 1.36 | 2.08 | 1.69 | 1.61 | 2.74 | 2.08 |
| ENTPD7         | 1.59 | 1.43 | 1.54 | 1.89 | 1.46 | 1.61 | 2.3  | 2.14 |
| GPSM3          | 2.03 | 2.33 | 1.74 | 1.81 | 1.64 | 1.61 | 1.56 | 2.25 |
| MYO5C          | 1.61 | 1.26 | 1.85 | 1.8  | 1.59 | 1.61 | 2.5  | 2.48 |
| LOC653602      | 1.71 | 1.33 | 1.72 | 1.92 | 1.68 | 1.61 | 3.11 | 2.92 |
| DAPL1          | 2.9  | 1.5  | 2.81 | 2.2  | 1.14 | 1.62 | 1.86 | 1.38 |
| HECW1          | 1.16 | 1.21 | 1.34 | 1.21 | 1.65 | 1.62 | 1.76 | 1.7  |
| CARD6          | 1.24 | 1.4  | 1.25 | 1.53 | 1.38 | 1.62 | 1.55 | 1.74 |
| ENOX1          | 1.57 | 1.21 | 1.42 | 1.59 | 1.58 | 1.62 | 1.71 | 1.75 |
| RGL3           | 1.64 | 1.22 | 1.41 | 1.47 | 1.22 | 1.62 | 1.92 | 1.93 |
| PCDHB11        | 1.84 | 2.12 | 2.07 | 1.81 | 1.69 | 1.62 | 1.82 | 1.94 |
| NPIP11         | 1.41 | 1.04 | 1.16 | 1.97 | 1.01 | 1.62 | 1.45 | 2.06 |
| CEP44          | 1.45 | 1.14 | 1.55 | 2    | 1.95 | 1.62 | 3.46 | 2.34 |
| KLHL28         | 1.65 | 1.82 | 1.94 | 1.96 | 1.25 | 1.62 | 2.9  | 2.53 |
| KANK3          | 1.65 | 1.53 | 1.25 | 1.26 | 1.57 | 1.63 | 1.31 | 1.48 |
| TMEM253        | 1.38 | 1.85 | 1.2  | 1.1  | 1.84 | 1.63 | 1.78 | 1.53 |
| MN1            | 1.78 | 1.85 | 1.62 | 1.71 | 1.38 | 1.63 | 1.42 | 1.55 |
| ZNF432         | 1.37 | 1.32 | 1.33 | 1.84 | 1.43 | 1.63 | 2.42 | 1.91 |
| LOC100996598   | 1.23 | 1.96 | 1.5  | 1.89 | 1.91 | 1.63 | 2.8  | 1.92 |
| CDH1           | 1.49 | 1.67 | 1.74 | 1.67 | 1.75 | 1.63 | 2.09 | 2.06 |
| GPR173         | 1.62 | 1.55 | 1.84 | 1.75 | 1.4  | 1.63 | 2.22 | 2.09 |
| FBXL2          | 1.48 | 1.87 | 1.96 | 1.88 | 1.86 | 1.63 | 2.76 | 2.43 |
| FAM179B        | 1.88 | 1.26 | 1.98 | 2.26 | 1.77 | 1.63 | 2.72 | 2.74 |
| PHOSPHO2       | 1.7  | 1.86 | 1.69 | 2.22 | 1.86 | 1.63 | 2.57 | 3.31 |
| TRIM39-RPP21   | 1.22 | 2.07 | 1.89 | 2.11 | 2.83 | 1.64 | 1.88 | 1.33 |
| PCDHGB2        | 1.17 | 1.46 | 1.95 | 2.18 | 1.32 | 1.64 | 1.95 | 1.36 |
| E2F2           | 2.21 | 1.92 | 1.94 | 2.35 | 1.78 | 1.64 | 1.43 | 1.68 |
| C1orf233       | 2.28 | 2.33 | 1.93 | 2.4  | 1.73 | 1.64 | 1.43 | 1.69 |
| LOC102724488   | 1.56 | 1.51 | 1.48 | 1.95 | 1.22 | 1.64 | 1.89 | 1.81 |
| PLA2R1         | 1.39 | 1.13 | 1.5  | 1.68 | 1.42 | 1.64 | 2.38 | 1.96 |
| KIAA1107       | 1.49 | 1.56 | 1.8  | 1.93 | 1.49 | 1.64 | 2.97 | 2.16 |
| NETO1          | 1.49 | 1.62 | 2.31 | 2.02 | 2.23 | 1.64 | 2.54 | 2.38 |
| CCDC191        | 1.45 | 1.29 | 1.86 | 2.03 | 1.44 | 1.64 | 3.15 | 2.44 |
| WDPCP          | 1.98 | 1.61 | 1.81 | 2.12 | 2.18 | 1.64 | 2.87 | 2.95 |
| VWA7           | 1.31 | 1.31 | 1.58 | 1.17 | 1.09 | 1.65 | 1.53 | 1.47 |
| NAT1           | 1.22 | 1.42 | 1.56 | 2.01 | 1.26 | 1.65 | 1.94 | 1.84 |
| HIVEP1         | 1.7  | 1.36 | 1.81 | 2.29 | 1.95 | 1.65 | 2.74 | 2.17 |
| NCOA7          | 1.8  | 1.62 | 1.99 | 2.25 | 1.44 | 1.65 | 3.05 | 2.36 |
| C15orf38-AP3S2 | 2.53 | 2.77 | 2.84 | 2.94 | 1.81 | 1.65 | 2.76 | 2.45 |
| SNX16          | 1.7  | 1.79 | 1.85 | 2.32 | 2.21 | 1.65 | 3.05 | 2.62 |
| GSG2           | 1.43 | 1.74 | 1.3  | 1.38 | 1.89 | 1.66 | 1.22 | 1.27 |
| ZSCAN16        | 1.93 | 1.65 | 1.28 | 1.55 | 1.47 | 1.66 | 1.79 | 1.99 |
| KIAA1958       | 1.69 | 1.45 | 1.73 | 2.04 | 1.69 | 1.66 | 2.4  | 2.38 |
| KCNJ8          | 1.41 | 1.66 | 1.36 | 1.31 | 1.95 | 1.67 | 1.85 | 1.81 |
| DCUN1D3        | 1.32 | 1.35 | 1.58 | 1.86 | 1.42 | 1.67 | 2.01 | 1.82 |
| GAPDHS         | 1.14 | 1.21 | 1.32 | 1.12 | 1.49 | 1.67 | 1.63 | 1.85 |
| MUC1           | 2.04 | 2.18 | 2.04 | 1.92 | 1.45 | 1.67 | 1.4  | 2    |
| ZFP69B         | 1.25 | 1.45 | 1.51 | 2.07 | 1.8  | 1.67 | 2.27 | 2.26 |
| ZNF548         | 2.02 | 1.77 | 2    | 2.58 | 2.4  | 1.67 | 2.68 | 2.28 |
| SULT4A1        | 1.59 | 1.23 | 1.68 | 1.88 | 1.86 | 1.67 | 1.91 | 2.31 |
| TSPAN2         | 1.64 | 1.95 | 2.04 | 2.19 | 1.82 | 1.67 | 2.16 | 2.36 |
| SERAC1         | 1.45 | 1.44 | 1.6  | 2.03 | 1.82 | 1.67 | 2.63 | 2.38 |
| LOC105379272   | 1.75 | 1.15 | 1.97 | 2.22 | 2.89 | 1.67 | 3.21 | 3.36 |
| MINOS1-NBL1    | 5.35 | 7.81 | 1.63 | 3.97 | 1.85 | 1.67 | 4.62 | 4.21 |
| CCDC88B        | 2.13 | 1.97 | 1.56 | 1.89 | 1.8  | 1.68 | 2.04 | 1.65 |
| LOC107984648   | 2.24 | 1.79 | 2.33 | 2.46 | 2.08 | 1.68 | 2.5  | 1.68 |
| ARMCX1         | 1.51 | 2.08 | 1.6  | 1.59 | 2.02 | 1.68 | 1.79 | 1.87 |
| SLC2A3         | 3.59 | 4.13 | 3.82 | 3.84 | 1.67 | 1.68 | 1.99 | 1.93 |
| SLC9A9         | 1.92 | 1.76 | 1.85 | 1.66 | 1.72 | 1.68 | 2.07 | 1.93 |
| IL1A           | 1.24 | 1.36 | 1.5  | 2.04 | 1.92 | 1.68 | 2.63 | 1.98 |
| KLF7           | 1.61 | 1.61 | 1.76 | 2.01 | 1.86 | 1.68 | 2.53 | 2.17 |
| VCX3B          | 1.77 | 2.1  | 1.75 | 2.44 | 1.59 | 1.68 | 2.32 | 2.31 |
| ENPP1          | 2.45 | 1.96 | 2.28 | 2.56 | 1.65 | 1.68 | 2.31 | 2.58 |
| HMOX1          | 1.29 | 1.69 | 1.38 | 1.53 | 1.65 | 1.69 | 1.47 | 1.74 |

|              |      |      |      |      |      |      |      |      |
|--------------|------|------|------|------|------|------|------|------|
| MMRN2        | 2.95 | 3.1  | 2.79 | 2.76 | 1.46 | 1.69 | 1.72 | 1.75 |
| PRSS8        | 1.95 | 2.6  | 2.36 | 1.88 | 1.48 | 1.69 | 1.11 | 1.77 |
| DDO          | 2.09 | 2.54 | 3.07 | 2.58 | 2.3  | 1.69 | 2.33 | 2.05 |
| DENND5B      | 1.52 | 1.28 | 1.69 | 2.05 | 1.67 | 1.69 | 2.48 | 2.11 |
| FAM228B      | 1.9  | 1.98 | 1.31 | 3.02 | 1.25 | 1.69 | 2.08 | 2.18 |
| ZNF518A      | 1.46 | 1.31 | 1.79 | 2.09 | 1.6  | 1.69 | 2.9  | 2.34 |
| CCDC66       | 1.73 | 1.44 | 1.54 | 1.65 | 1.11 | 1.69 | 2.81 | 2.41 |
| ZNF720       | 1.54 | 1.85 | 1.78 | 2.22 | 2.26 | 1.69 | 2.51 | 2.48 |
| TCTEX1D4     | 1.56 | 1.31 | 1.42 | 1.26 | 1.57 | 1.69 | 2.57 | 2.58 |
| NPIP8        | 1.19 | 1.55 | 1.69 | 1.65 | 1.32 | 1.69 | 3.83 | 2.91 |
| SORCS1       | 1.45 | 1.89 | 1.62 | 1.71 | 1.19 | 1.7  | 1.58 | 1.41 |
| LOC107987017 | 2.16 | 1.56 | 1.38 | 2.37 | 2.1  | 1.7  | 1.64 | 1.52 |
| HAP1         | 2.13 | 2.39 | 2.19 | 2.07 | 1.79 | 1.7  | 1.39 | 1.55 |
| NPTXR        | 1.62 | 1.8  | 1.6  | 1.62 | 1.66 | 1.7  | 1.36 | 1.63 |
| PIPOX        | 1.33 | 1.3  | 1.36 | 1.38 | 1.79 | 1.7  | 1.56 | 1.87 |
| UPK3B        | 1.93 | 2.11 | 1.8  | 2.14 | 2.72 | 1.7  | 2.06 | 1.9  |
| ZSCAN5A      | 2.11 | 1.76 | 1.64 | 1.41 | 1.62 | 1.7  | 1.66 | 2.16 |
| ZNF136       | 1.61 | 1.39 | 1.47 | 2.13 | 1.49 | 1.7  | 2.65 | 2.6  |
| MGLL         | 1.09 | 1.46 | 1.28 | 1.16 | 1.7  | 1.71 | 1.25 | 1.35 |
| CCNA1        | 1.45 | 1.42 | 1.63 | 1.81 | 1.89 | 1.71 | 1.51 | 1.35 |
| WRB-SH3BGR   | 1.09 | 1.25 | 1.8  | 1.02 | 2.08 | 1.71 | 1.99 | 1.61 |
| KDM4D        | 1.61 | 1.66 | 1.74 | 1.95 | 2.14 | 1.71 | 2.06 | 2.02 |
| TIGD2        | 1.51 | 1.49 | 1.79 | 2    | 1.8  | 1.71 | 2.19 | 2.18 |
| ZNF33B       | 1.71 | 1.55 | 1.88 | 2.52 | 1.74 | 1.71 | 3.6  | 2.55 |
| HOGA1        | 2.18 | 1.61 | 1.48 | 1.93 | 1.43 | 1.72 | 1.42 | 1.6  |
| RCS1         | 1.91 | 1.91 | 1.94 | 2.05 | 2.18 | 1.72 | 1.66 | 1.67 |
| ICAM2        | 1.41 | 1.52 | 2.04 | 1.37 | 1.34 | 1.72 | 1.32 | 1.69 |
| LOC101929747 | 1.49 | 1.68 | 1.53 | 1.1  | 1.83 | 1.72 | 1.03 | 1.72 |
| PRKAR2B      | 1.12 | 1.22 | 1.28 | 1.42 | 1.53 | 1.72 | 2.07 | 1.73 |
| ZNF677       | 1.26 | 1.47 | 1.42 | 1.72 | 1.83 | 1.72 | 2.16 | 2.06 |
| PUS7L        | 1.3  | 1.3  | 1.4  | 1.71 | 1.68 | 1.72 | 2.95 | 2.23 |
| ZNF607       | 1.81 | 1.68 | 1.82 | 2.11 | 1.75 | 1.72 | 2.38 | 2.25 |
| ZNF468       | 1.12 | 1.42 | 1.63 | 2.16 | 1.8  | 1.72 | 2.54 | 2.28 |
| CNKS2        | 2.24 | 1.9  | 2.13 | 2.27 | 1.55 | 1.72 | 2.52 | 2.36 |
| STK17B       | 1.8  | 1.52 | 1.98 | 2.2  | 1.87 | 1.72 | 2.81 | 2.39 |
| PCDH13       | 1.91 | 1.62 | 2.28 | 2.05 | 1.43 | 1.72 | 2.05 | 2.49 |
| LYZ          | 2.19 | 1.44 | 1.79 | 1.95 | 1.72 | 1.72 | 2.47 | 2.59 |
| CPLX1        | 2.43 | 2.41 | 2.41 | 2.32 | 1.71 | 1.73 | 1.51 | 1.14 |
| ZNF837       | 1.31 | 1.57 | 1.59 | 1.77 | 1.47 | 1.73 | 1.18 | 1.34 |
| IRF5         | 1.58 | 1.32 | 1.25 | 1.5  | 1.7  | 1.73 | 1.31 | 1.41 |
| CLCF1        | 1.64 | 1.74 | 1.89 | 2.02 | 2.15 | 1.73 | 1.77 | 1.66 |
| GLIPR1       | 1.26 | 1.3  | 1.16 | 1.26 | 1.93 | 1.73 | 3.06 | 1.91 |
| C5orf34      | 1.35 | 1.07 | 1.58 | 1.81 | 1.4  | 1.73 | 2.6  | 2.05 |
| ZSCAN22      | 1.69 | 1.99 | 1.59 | 1.42 | 1.63 | 1.73 | 2.08 | 2.2  |
| TMTC1        | 1.31 | 1.25 | 1.55 | 1.71 | 1.81 | 1.73 | 2.51 | 2.27 |
| ZNF182       | 1.56 | 1.57 | 1.85 | 1.91 | 1.59 | 1.73 | 2.82 | 2.57 |
| 44256        | 1.27 | 1.39 | 1.54 | 1.23 | 1.59 | 1.74 | 1.81 | 1.56 |
| PRAME        | 1.3  | 1.86 | 1.67 | 1.81 | 1.67 | 1.74 | 1.36 | 1.72 |
| LDAH         | 1.62 | 1.46 | 1.71 | 1.75 | 2.09 | 1.74 | 2.43 | 2.1  |
| ECHDC2       | 1.41 | 1.25 | 1.41 | 1.41 | 1.82 | 1.74 | 2.5  | 2.38 |
| KIF21A       | 1.43 | 1.54 | 1.66 | 2.18 | 1.68 | 1.74 | 3.03 | 2.52 |
| NLRP6        | 1.55 | 1.63 | 1.51 | 1.29 | 1.58 | 1.75 | 1.31 | 1.33 |
| BCL2         | 1.64 | 1.16 | 1.33 | 1.25 | 1.34 | 1.75 | 1.8  | 1.45 |
| RIBC1        | 1.58 | 1.55 | 1.5  | 1.94 | 1.65 | 1.75 | 1.55 | 1.7  |
| SEMA6A       | 2.64 | 2.51 | 2.67 | 2.84 | 1.62 | 1.75 | 1.96 | 1.81 |
| LOC107984110 | 1.61 | 1.63 | 1.25 | 1.8  | 1.57 | 1.75 | 2.36 | 1.82 |
| SNCAIP       | 1.88 | 1.76 | 2.09 | 2.74 | 1.69 | 1.75 | 2.18 | 1.96 |
| ZW10         | 1.76 | 1.39 | 1.91 | 2.03 | 1.93 | 1.75 | 2.77 | 2    |
| MAP3K1       | 2.1  | 1.73 | 2.23 | 2.29 | 1.83 | 1.75 | 2.32 | 2.09 |
| ZSCAN9       | 2.72 | 1.51 | 2.7  | 2.96 | 1.94 | 1.75 | 2.62 | 2.13 |
| KIF9         | 2.33 | 1.92 | 1.72 | 2.41 | 2.67 | 1.75 | 2.24 | 2.22 |
| TTC25        | 1.8  | 2.59 | 1.97 | 1.81 | 1.86 | 1.75 | 1.74 | 2.34 |
| PRMT9        | 1.6  | 1.54 | 1.69 | 2.23 | 1.79 | 1.75 | 2.54 | 2.4  |
| ARL13B       | 1.86 | 1.59 | 1.89 | 2.31 | 1.66 | 1.75 | 3.36 | 2.59 |
| SESTD1       | 1.5  | 1.5  | 1.77 | 2.25 | 1.94 | 1.75 | 2.92 | 2.61 |
| LYST         | 1.52 | 1.43 | 1.83 | 2.37 | 1.63 | 1.75 | 3.31 | 2.92 |
| PKDCC        | 2.03 | 2.21 | 2.09 | 2    | 1.54 | 1.76 | 1.78 | 1.61 |
| ZNF445       | 2.14 | 1.92 | 2.09 | 2.42 | 1.81 | 1.76 | 2.28 | 1.92 |
| SPICE1       | 1.65 | 1.45 | 2.32 | 2.42 | 1.64 | 1.76 | 2.81 | 2.23 |
| SPAG1        | 1.61 | 1.66 | 1.89 | 1.67 | 1.52 | 1.76 | 2.79 | 2.27 |
| ZSCAN26      | 2.54 | 2.9  | 3    | 3.33 | 1.46 | 1.76 | 2.61 | 2.31 |
| CEP83        | 1.65 | 1.78 | 1.72 | 1.81 | 1.78 | 1.76 | 3.02 | 2.33 |
| ATXN3        | 1.46 | 1.35 | 1.6  | 1.98 | 1.84 | 1.76 | 2.72 | 2.44 |
| ZNF44        | 1.91 | 1.67 | 2.06 | 2.49 | 1.7  | 1.76 | 2.96 | 2.59 |
| CASC5        | 1.36 | 1.28 | 1.67 | 1.48 | 1.68 | 1.76 | 3.29 | 2.6  |
| ARHGFE26     | 2.09 | 1.39 | 1.82 | 1.96 | 1.64 | 1.76 | 2.68 | 2.65 |
| OSBP2        | 1.83 | 2.15 | 1.95 | 1.91 | 1.83 | 1.77 | 1.54 | 1.65 |
| CASKIN1      | 1.66 | 1.41 | 1.43 | 1.55 | 1.69 | 1.77 | 1.87 | 1.84 |
| HRH1         | 1.38 | 1.27 | 1.29 | 1.81 | 1.86 | 1.77 | 2.29 | 1.94 |
| TREX2        | 1.97 | 2.01 | 2.05 | 1.37 | 1.65 | 1.77 | 2.35 | 2.03 |
| ARHGAP33     | 1.73 | 1.65 | 2.04 | 2.01 | 1.61 | 1.77 | 2.24 | 2.07 |
| MBD5         | 1.37 | 1.38 | 1.67 | 1.92 | 1.73 | 1.77 | 2.38 | 2.1  |

|              |      |      |      |      |      |      |      |      |
|--------------|------|------|------|------|------|------|------|------|
| DTWD2        | 1.65 | 1.41 | 1.54 | 2.01 | 1.64 | 1.77 | 2.45 | 2.21 |
| ZNF736       | 1.75 | 2.32 | 2.63 | 2.04 | 1.83 | 1.77 | 3.01 | 2.77 |
| RNF32        | 1.6  | 1.79 | 2.11 | 2.33 | 1.86 | 1.77 | 2.6  | 2.78 |
| AKR1C2       | 1.7  | 1.41 | 1.42 | 1    | 1.34 | 1.78 | 1.82 | 1.76 |
| ZNF155       | 1.44 | 1.6  | 1.58 | 1.51 | 1.45 | 1.78 | 2.25 | 1.95 |
| KIAA1211     | 1.64 | 1.63 | 1.74 | 1.74 | 1.72 | 1.78 | 2.44 | 2.06 |
| LOC401052    | 1.39 | 1.77 | 1.75 | 1.48 | 1.83 | 1.78 | 1.82 | 2.32 |
| TTL3         | 1.97 | 2.12 | 1.69 | 2.3  | 2.24 | 1.78 | 2.74 | 2.61 |
| SAYSD1       | 1.52 | 1.28 | 2.04 | 1.61 | 1.98 | 1.79 | 1.88 | 1.43 |
| AK5          | 1.3  | 1.02 | 1.19 | 1.03 | 1.76 | 1.79 | 1.67 | 1.61 |
| HID1         | 3.1  | 2.88 | 2.56 | 2.42 | 1.96 | 1.79 | 1.33 | 1.75 |
| ATP8B3       | 1.86 | 1.55 | 1.85 | 1.78 | 1.55 | 1.79 | 2    | 1.83 |
| GPR39        | 2.01 | 1.86 | 1.94 | 1.65 | 2.09 | 1.79 | 1.79 | 1.92 |
| KLLN         | 1.64 | 1.4  | 1.38 | 1.61 | 2.06 | 1.79 | 2.45 | 2    |
| FAM149A      | 2.03 | 2.13 | 1.9  | 1.88 | 1.82 | 1.79 | 1.78 | 2.08 |
| SIK2         | 1.88 | 1.81 | 2.02 | 1.76 | 2.02 | 1.79 | 1.9  | 2.21 |
| SGK494       | 1.87 | 1.49 | 1.59 | 2.01 | 1.73 | 1.79 | 2.84 | 2.28 |
| MSANTD2      | 1.57 | 1.79 | 2.07 | 2.35 | 1.89 | 1.79 | 3.14 | 2.4  |
| YOD1         | 1.78 | 1.34 | 1.84 | 2.2  | 1.83 | 1.79 | 3.53 | 3.16 |
| RPS6KA6      | 1.4  | 1.7  | 2.03 | 2.12 | 2.35 | 1.79 | 3.36 | 3.27 |
| DOK6         | 1.23 | 1.28 | 1.55 | 1.93 | 1.29 | 1.8  | 1.96 | 1.31 |
| STAT5A       | 1.66 | 1.97 | 1.78 | 1.79 | 1.96 | 1.8  | 1.52 | 1.83 |
| SYNM         | 2.12 | 1.74 | 2.31 | 2.15 | 1.7  | 1.8  | 2.02 | 2.07 |
| ZSCAN30      | 1.62 | 1.63 | 2.17 | 2    | 1.54 | 1.8  | 2.5  | 2.18 |
| ZNF407       | 1.6  | 1.28 | 1.8  | 1.94 | 1.96 | 1.8  | 2.42 | 2.24 |
| PLAGL1       | 1.83 | 1.87 | 2.15 | 2.21 | 2.07 | 1.8  | 2.82 | 2.28 |
| ZNF772       | 1.72 | 1.61 | 2.1  | 2.18 | 1.76 | 1.8  | 2.11 | 2.38 |
| CEP57L1      | 1.22 | 1.48 | 2.18 | 2.05 | 1.58 | 1.8  | 3.49 | 2.57 |
| DENND4A      | 1.41 | 1.36 | 1.83 | 2.2  | 1.59 | 1.8  | 3.03 | 2.66 |
| PRSS22       | 1.81 | 1.95 | 1.81 | 2.14 | 1.48 | 1.81 | 1.46 | 1.12 |
| IL22RA1      | 2.46 | 2.42 | 2.08 | 2.15 | 2.04 | 1.81 | 1.79 | 1.64 |
| KSR1         | 1.53 | 1.69 | 1.52 | 1.46 | 1.6  | 1.81 | 2.16 | 2.08 |
| CASP10       | 2.04 | 2.01 | 2.02 | 2.11 | 2.26 | 1.81 | 2.01 | 2.13 |
| ZNF814       | 1.63 | 1.68 | 1.85 | 2.1  | 1.73 | 1.81 | 2.4  | 2.29 |
| SHOX         | 1.53 | 1.61 | 1.58 | 1.87 | 1.71 | 1.81 | 2.82 | 2.29 |
| RAPGEF2      | 1.91 | 1.54 | 1.86 | 2.35 | 1.86 | 1.81 | 2.91 | 2.65 |
| ZBTB21       | 1.79 | 1.71 | 2.38 | 2.63 | 2.11 | 1.81 | 3.58 | 2.78 |
| AUNIP        | 2.23 | 2.09 | 2.19 | 2.16 | 2.45 | 1.82 | 2.6  | 1.99 |
| ZNF20        | 1.53 | 1.29 | 1.8  | 1.97 | 1.41 | 1.82 | 2.02 | 2.2  |
| ROR1         | 1.76 | 1.3  | 2.03 | 1.99 | 1.97 | 1.82 | 2.24 | 2.38 |
| FRS2         | 1.82 | 1.47 | 1.86 | 2.24 | 2.18 | 1.82 | 3.21 | 2.76 |
| FNTB         | 3.98 | 3.08 | 2.87 | 3.73 | 3.42 | 1.82 | 3.34 | 2.77 |
| FILIP1L      | 3.12 | 3.29 | 3.95 | 4.32 | 1.9  | 1.82 | 3.38 | 3    |
| LOC107984155 | 1.88 | 1.69 | 1.81 | 1.69 | 2.26 | 1.83 | 1.64 | 1.66 |
| DISP1        | 1.74 | 1.7  | 1.76 | 1.8  | 1.65 | 1.83 | 1.68 | 1.75 |
| TMEM182      | 1.57 | 1.6  | 1.39 | 2.68 | 2.04 | 1.83 | 2.21 | 1.97 |
| USP28        | 1.8  | 1.63 | 1.9  | 1.77 | 2.04 | 1.83 | 2.24 | 2.09 |
| KLF9         | 1.61 | 1.6  | 1.89 | 2.11 | 1.69 | 1.83 | 1.99 | 2.1  |
| SERPINB8     | 1.58 | 1.83 | 1.8  | 1.79 | 1.77 | 1.83 | 2.22 | 2.12 |
| HELQ         | 1.46 | 1.8  | 2.15 | 1.95 | 1.98 | 1.83 | 2.65 | 2.21 |
| ZNF721       | 1.38 | 1.21 | 1.44 | 2.14 | 1.46 | 1.83 | 2.96 | 2.36 |
| FAIM         | 2.08 | 1.69 | 2.88 | 2.13 | 2.11 | 1.83 | 2.34 | 2.54 |
| PRKCH        | 2.1  | 1.85 | 2    | 2.24 | 2.24 | 1.83 | 2.4  | 2.76 |
| C18orf54     | 1.93 | 1.69 | 1.82 | 2.41 | 1.99 | 1.83 | 3.7  | 2.84 |
| PHYHIPL      | 1.46 | 1.39 | 1.6  | 2.08 | 1.62 | 1.83 | 3.59 | 3.04 |
| ARIH2OS      | 1.71 | 1.86 | 1.66 | 2.59 | 1.72 | 1.84 | 1.91 | 1.85 |
| NAP1L2       | 1.77 | 1.7  | 1.85 | 2.23 | 2.11 | 1.84 | 2.54 | 1.98 |
| ADGRL3       | 2.17 | 1.88 | 2.32 | 2.43 | 1.6  | 1.84 | 2.19 | 2.04 |
| GRAPL        | 1.92 | 1.99 | 1.74 | 2.04 | 2.02 | 1.84 | 2.53 | 2.28 |
| MICU3        | 1.94 | 1.11 | 1.25 | 1.59 | 1.34 | 1.84 | 2.51 | 2.38 |
| ZFX          | 1.58 | 1.6  | 1.79 | 2.18 | 1.61 | 1.84 | 2.47 | 2.52 |
| PLSCR4       | 2.36 | 2.08 | 2.81 | 3.45 | 2.26 | 1.84 | 3.15 | 3.29 |
| C5orf66      | 1.48 | 1.42 | 1.94 | 2.11 | 1.96 | 1.85 | 2.18 | 1.65 |
| ALX4         | 2.19 | 2.2  | 2.61 | 2.05 | 1.87 | 1.85 | 1.7  | 2.22 |
| CCNJ         | 1.74 | 1.57 | 1.69 | 2.13 | 1.66 | 1.85 | 2.5  | 2.26 |
| ATAD5        | 1.39 | 1.72 | 1.47 | 2.09 | 1.55 | 1.85 | 2.94 | 2.41 |
| ANK3         | 1.67 | 1.79 | 2.07 | 2.23 | 2.23 | 1.85 | 2.85 | 2.52 |
| ERO1B        | 2.06 | 1.86 | 2.35 | 2.71 | 1.72 | 1.85 | 3.49 | 2.53 |
| LMLN         | 1.81 | 1.66 | 1.98 | 2.44 | 1.97 | 1.85 | 3.16 | 2.6  |
| FAM111B      | 1.89 | 1.45 | 2.23 | 2.36 | 1.97 | 1.85 | 3.29 | 2.65 |
| ZFP30        | 1.84 | 1.55 | 2.26 | 2.47 | 1.75 | 1.85 | 2.86 | 2.71 |
| LRCH2        | 1.53 | 1.43 | 2.05 | 1.9  | 1.61 | 1.85 | 3.54 | 2.89 |
| USP45        | 1.74 | 1.99 | 2.48 | 2.23 | 2.73 | 1.85 | 4.67 | 4.02 |
| USP27X       | 2.24 | 1.99 | 1.99 | 1.88 | 1.69 | 1.86 | 1.64 | 1.94 |
| PDZD7        | 2.47 | 2.39 | 1.94 | 1.98 | 1.93 | 1.86 | 2.11 | 2.03 |
| DNMT3B       | 2.15 | 2.31 | 2.52 | 2.22 | 2.28 | 1.86 | 2.14 | 2.05 |
| ZNF641       | 1.82 | 2.12 | 1.77 | 1.77 | 1.93 | 1.86 | 2.47 | 2.21 |
| NUP62CL      | 1.99 | 1.69 | 1.63 | 2.6  | 1.6  | 1.86 | 2.6  | 2.41 |
| SPATA17      | 2.51 | 2.45 | 2.79 | 2.81 | 2.57 | 1.86 | 3.29 | 2.46 |
| RBM7         | 1.93 | 1.43 | 1.81 | 2.13 | 2.02 | 1.86 | 2.89 | 2.49 |
| ZNF514       | 2.11 | 1.85 | 2.06 | 2.22 | 2.2  | 1.86 | 3.05 | 2.68 |
| B4GALT6      | 1.88 | 1.51 | 2.1  | 2.42 | 1.89 | 1.86 | 2.81 | 2.85 |
| PRR36        | 2.79 | 2.9  | 2.4  | 2.59 | 1.65 | 1.87 | 1.23 | 1.51 |
| VAX2         | 2.13 | 2.23 | 1.42 | 1.32 | 1.87 | 1.87 | 1.38 | 1.51 |
| C19orf57     | 2.14 | 2.12 | 2    | 1.75 | 1.47 | 1.87 | 1.78 | 1.55 |

|                |      |      |      |      |      |      |      |      |
|----------------|------|------|------|------|------|------|------|------|
| CASC10         | 1.59 | 1.86 | 1.81 | 1.75 | 1.76 | 1.87 | 1.53 | 1.59 |
| NKX3-1         | 1.67 | 1.73 | 1.78 | 1.97 | 1.78 | 1.87 | 2.01 | 1.84 |
| LOC105370687   | 2.01 | 1.84 | 1.88 | 1.47 | 1.97 | 1.87 | 2.22 | 1.93 |
| ZNF606         | 1.72 | 1.37 | 2    | 2.28 | 1.8  | 1.87 | 2.37 | 2.03 |
| CARD11         | 1.73 | 1.74 | 1.75 | 1.85 | 2.1  | 1.87 | 1.65 | 2.18 |
| ALG10          | 1.35 | 1.39 | 1.75 | 1.78 | 1.77 | 1.87 | 2.52 | 2.26 |
| NIPAL2         | 1.66 | 1.36 | 1.88 | 2    | 1.95 | 1.87 | 2.54 | 2.33 |
| PFKFB2         | 1.58 | 1.44 | 1.49 | 1.98 | 1.69 | 1.87 | 2.63 | 2.36 |
| ZNF793         | 1.67 | 1.65 | 1.74 | 2.25 | 1.76 | 1.87 | 2.91 | 2.61 |
| EPHA3          | 2.22 | 1.68 | 2.18 | 2.66 | 1.53 | 1.87 | 2.09 | 2.64 |
| SNRNP48        | 1.68 | 1.95 | 1.74 | 2.67 | 2.4  | 1.87 | 3.99 | 3.32 |
| CISH           | 2.19 | 1.94 | 1.84 | 1.74 | 1.55 | 1.88 | 1.24 | 1.53 |
| DEPTOR         | 1.9  | 2.13 | 2.16 | 2.01 | 1.77 | 1.88 | 1.96 | 1.62 |
| C1orf116       | 1.2  | 1.62 | 1.44 | 1.24 | 2.15 | 1.88 | 1.67 | 1.68 |
| RNF144A        | 2.12 | 2.12 | 1.96 | 2.04 | 1.73 | 1.88 | 1.81 | 1.97 |
| TMEM242        | 1.96 | 1.91 | 2.09 | 2.24 | 1.9  | 1.88 | 2.75 | 2.42 |
| ADPRM          | 1.76 | 1.59 | 1.72 | 1.29 | 2.26 | 1.88 | 2.37 | 2.47 |
| RPGR           | 1.31 | 1.44 | 1.76 | 2.28 | 2    | 1.88 | 2.81 | 2.71 |
| ZNF675         | 1.89 | 2.22 | 2.05 | 2.62 | 1.91 | 1.88 | 3.6  | 3.47 |
| CYP2J2         | 1.68 | 1.91 | 1.88 | 2.24 | 2.04 | 1.89 | 1.83 | 1.5  |
| PTPRN2         | 1.66 | 1.71 | 1.82 | 1.66 | 1.82 | 1.89 | 1.78 | 1.86 |
| FSTL3          | 2.09 | 2.42 | 2.11 | 1.98 | 2.3  | 1.89 | 1.78 | 2.17 |
| SERTM1         | 1.68 | 1.51 | 1.69 | 2.12 | 2.21 | 1.89 | 2.84 | 2.25 |
| IDI2           | 1.42 | 1.24 | 1.86 | 2.01 | 1.96 | 1.89 | 1.98 | 2.29 |
| ZBTB3          | 1.73 | 1.73 | 1.82 | 1.91 | 1.97 | 1.89 | 2.21 | 2.3  |
| ATAD3C         | 2.06 | 2.27 | 2.03 | 2.48 | 1.86 | 1.89 | 2.19 | 2.43 |
| DYX1C1         | 1.66 | 1.54 | 1.43 | 2.02 | 2.16 | 1.89 | 2.12 | 2.47 |
| SMAD9          | 1.59 | 1.67 | 2.11 | 2.37 | 2.17 | 1.89 | 2.73 | 2.59 |
| DZIP1L         | 1.92 | 1.57 | 2.28 | 2.19 | 1.66 | 1.89 | 1.93 | 2.66 |
| FAM83B         | 1.65 | 1.58 | 1.81 | 2.15 | 1.62 | 1.89 | 2.83 | 2.83 |
| ENTPD1         | 2.47 | 2.32 | 2.42 | 2.43 | 2.84 | 1.89 | 3.47 | 3.22 |
| SPRN           | 1.81 | 1.65 | 1.66 | 1.62 | 1.91 | 1.9  | 2.2  | 1.96 |
| STAT4          | 1.65 | 1.49 | 1.73 | 1.46 | 1.62 | 1.9  | 2.01 | 1.98 |
| PXYLP1         | 3.08 | 2.69 | 2.96 | 3.67 | 2.3  | 1.9  | 2.72 | 2.35 |
| DSEL           | 1.84 | 1.51 | 1.89 | 2.11 | 1.77 | 1.9  | 2.62 | 2.49 |
| CEP97          | 1.38 | 1.28 | 1.56 | 2.09 | 1.83 | 1.9  | 3.24 | 2.87 |
| C7orf55-LUC7L2 | 2.22 | 3.8  | 2.86 | 4.93 | 4.01 | 1.9  | 4.73 | 4.66 |
| CYP26B1        | 2.41 | 2.55 | 2.49 | 2.39 | 1.85 | 1.91 | 1.46 | 1.63 |
| MAML3          | 2.16 | 1.94 | 2.18 | 2.44 | 2.25 | 1.91 | 2.51 | 2.19 |
| MTM1           | 1.91 | 1.32 | 1.85 | 2.26 | 1.55 | 1.91 | 2.99 | 2.31 |
| SPIN3          | 1.7  | 1.64 | 2.2  | 2.02 | 2.27 | 1.91 | 3.15 | 2.53 |
| OGFRL1         | 1.91 | 1.77 | 2.28 | 2.61 | 2.2  | 1.91 | 3.55 | 2.91 |
| RAB20          | 2.46 | 2.52 | 2.49 | 1.83 | 1.82 | 1.92 | 1.6  | 1.44 |
| C17orf67       | 1.91 | 1.98 | 1.86 | 1.79 | 1.41 | 1.92 | 1.75 | 1.52 |
| CALHM2         | 1.82 | 1.47 | 1.3  | 1.35 | 2.05 | 1.92 | 1.6  | 1.84 |
| ZNF202         | 1.73 | 2.06 | 1.99 | 2.01 | 2.15 | 1.92 | 2.68 | 2.11 |
| C2orf27A       | 1.89 | 2.03 | 2.08 | 2.39 | 2.5  | 1.92 | 2.26 | 2.35 |
| THAP10         | 2.33 | 2.08 | 2.36 | 2.48 | 2.09 | 1.92 | 2.47 | 2.35 |
| ZNF267         | 2.12 | 2.16 | 1.97 | 2.18 | 1.64 | 1.92 | 3.28 | 2.45 |
| STXBP4         | 1.29 | 1.22 | 1.75 | 1.83 | 1.69 | 1.92 | 3.05 | 2.59 |
| GBP3           | 2.47 | 2.25 | 2.39 | 3.05 | 1.82 | 1.92 | 3.25 | 2.77 |
| SH3BGRL2       | 2.11 | 1.79 | 1.83 | 2.32 | 1.94 | 1.93 | 2.58 | 2.36 |
| MOXD1          | 1.86 | 1.99 | 2.23 | 2.42 | 1.94 | 1.93 | 3.05 | 2.4  |
| LECT1          | 2.43 | 3.49 | 2.85 | 2.59 | 1.66 | 1.93 | 1.75 | 2.46 |
| ABCA5          | 1.66 | 1.34 | 1.94 | 2.3  | 1.81 | 1.93 | 3.41 | 2.99 |
| BAIAP3         | 2.46 | 2.28 | 2.14 | 1.94 | 1.39 | 1.94 | 1.11 | 1.44 |
| SLC30A4        | 1.78 | 1.28 | 2.19 | 2.46 | 2    | 1.94 | 2.06 | 1.71 |
| NPAS1          | 1.85 | 2.66 | 2.26 | 1.57 | 1.81 | 1.94 | 1.87 | 1.73 |
| PRDM5          | 1.56 | 1.28 | 1.64 | 1.49 | 1.37 | 1.94 | 1.81 | 1.8  |
| ALDH5A1        | 1.77 | 1.95 | 2.03 | 2.35 | 1.87 | 1.94 | 1.85 | 1.92 |
| PTPRM          | 2.3  | 2    | 2.2  | 2.56 | 2.04 | 1.94 | 2.84 | 2.15 |
| MFSD4B         | 2.12 | 2.17 | 2.17 | 2.08 | 1.92 | 1.94 | 2.51 | 2.18 |
| FUT10          | 1.88 | 1.63 | 2.01 | 2.42 | 1.65 | 1.94 | 2.51 | 2.41 |
| GAGE2A         | 3.6  | 1.45 | 2.7  | 1.78 | 3.53 | 1.95 | 1.37 | 1.13 |
| CA11           | 1.7  | 2.15 | 2.2  | 1.69 | 1.28 | 1.95 | 1.67 | 1.63 |
| DENND2A        | 2.49 | 2.32 | 2.5  | 2.74 | 1.61 | 1.95 | 2.09 | 1.95 |
| SLAIN1         | 1.88 | 2.22 | 2.41 | 2.35 | 2.14 | 1.95 | 2.14 | 1.96 |
| HOXB3          | 1.78 | 1.59 | 1.63 | 2.2  | 1.49 | 1.95 | 1.96 | 1.97 |
| CDC14A         | 2.02 | 1.81 | 2.1  | 2.24 | 2.16 | 1.95 | 2.7  | 2.12 |
| TAF5           | 1.41 | 1.22 | 1.71 | 1.81 | 1.88 | 1.95 | 2.14 | 2.37 |
| ZNF138         | 1.58 | 1.2  | 1.74 | 2.07 | 1.9  | 1.95 | 2.85 | 2.49 |
| RBM43          | 2.22 | 2.05 | 2.33 | 2.48 | 2.11 | 1.95 | 2.63 | 2.63 |
| ARFGEF3        | 1.72 | 1.68 | 2.22 | 2.43 | 2    | 1.95 | 2.94 | 2.76 |
| ZEB1           | 1.71 | 1.62 | 2.21 | 2.44 | 1.56 | 1.95 | 3.2  | 2.81 |
| CLGN           | 2.25 | 2.67 | 2.42 | 3.03 | 2.44 | 1.95 | 3.88 | 2.86 |
| DOPEY1         | 2    | 1.65 | 2.16 | 2.74 | 1.92 | 1.95 | 3.6  | 3.05 |
| ZNF471         | 1.6  | 1.45 | 1.88 | 2.75 | 2.19 | 1.95 | 3.71 | 3.21 |
| ZNF680         | 1.84 | 1.79 | 1.97 | 2.66 | 1.79 | 1.95 | 3.24 | 3.26 |
| MOCS1          | 1.62 | 1.36 | 1.49 | 1.72 | 1.94 | 1.96 | 1.48 | 1.52 |
| CXCL16         | 2.22 | 1.99 | 2.16 | 1.66 | 2.14 | 1.96 | 1.73 | 1.84 |
| CDS1           | 1.88 | 1.72 | 1.85 | 2.56 | 2.05 | 1.96 | 2.81 | 2.41 |
| CACNA2D1       | 1.51 | 1.63 | 1.79 | 2.92 | 2.15 | 1.96 | 3.13 | 2.66 |
| SLC36A4        | 1.14 | 1.61 | 1.67 | 2.12 | 2.05 | 1.96 | 2.97 | 2.88 |
| CCDC152        | 1.69 | 1.71 | 2.12 | 3.07 | 2.32 | 1.96 | 3.77 | 3.49 |



|              |      |      |      |      |      |      |      |      |
|--------------|------|------|------|------|------|------|------|------|
| RHPN2        | 2.2  | 2.04 | 2.24 | 1.87 | 2.37 | 1.97 | 2.64 | 1.82 |
| ARSG         | 1.54 | 1.44 | 1.42 | 1.63 | 1.64 | 1.97 | 1.5  | 1.88 |
| ALG1L2       | 2.77 | 1.88 | 1.87 | 1.7  | 1.65 | 1.97 | 1.77 | 1.93 |
| PCED1B       | 2.82 | 2.28 | 2.17 | 3.03 | 2.36 | 1.97 | 2.38 | 2.28 |
| LSM8         | 1.75 | 1.66 | 1.74 | 1.96 | 1.89 | 1.97 | 2.76 | 2.48 |
| ZNF141       | 1.67 | 1.78 | 1.51 | 2.34 | 1.69 | 1.97 | 2.95 | 2.61 |
| C16orf52     | 1.68 | 1.62 | 1.91 | 2.9  | 2.41 | 1.97 | 3.75 | 3.1  |
| LOC100652777 | 1.79 | 1.85 | 1.92 | 2.17 | 1.63 | 1.97 | 4.19 | 3.11 |
| BICDL1       | 1.52 | 1.49 | 1.36 | 1.58 | 1.93 | 1.98 | 1.86 | 1.76 |
| RPS6KL1      | 2.02 | 1.42 | 2.15 | 2.02 | 1.42 | 1.98 | 1.88 | 1.82 |
| ZNF618       | 2.24 | 2.16 | 1.96 | 2.13 | 2.15 | 1.98 | 2.15 | 1.88 |
| CACNG8       | 1.71 | 1.63 | 1.89 | 1.85 | 1.63 | 1.98 | 2.26 | 2.33 |
| PCSK4        | 1.76 | 2.05 | 1.58 | 1.95 | 1.82 | 1.98 | 2.4  | 2.33 |
| CISD2        | 1.72 | 1.74 | 1.85 | 2.06 | 2    | 1.98 | 3.1  | 2.44 |
| PTEN         | 2.03 | 1.99 | 2.12 | 2.56 | 1.82 | 1.98 | 3.1  | 2.77 |
| NOCT         | 2.05 | 2.04 | 1.98 | 1.73 | 1.98 | 1.99 | 1.36 | 1.71 |
| SPATA25      | 1.81 | 1.61 | 1.68 | 2.13 | 1.44 | 1.99 | 2.25 | 1.77 |
| PRSS53       | 2.21 | 1.89 | 1.93 | 2.04 | 2.44 | 1.99 | 2.11 | 1.84 |
| TNRC6C       | 1.74 | 1.43 | 1.73 | 1.82 | 1.7  | 1.99 | 1.78 | 1.95 |
| LINGO2       | 2.22 | 2.38 | 2.6  | 2.39 | 1.93 | 1.99 | 2.34 | 2.33 |
| GDPD1        | 1.92 | 1.82 | 2.23 | 2.2  | 1.96 | 1.99 | 3.12 | 2.58 |
| ADAMTS12     | 1.98 | 2.35 | 2.28 | 2.5  | 2.05 | 1.99 | 2.23 | 2.75 |
| HIVEP2       | 2.28 | 1.98 | 2.46 | 2.57 | 2.04 | 1.99 | 3.3  | 2.81 |
| BBS9         | 1.95 | 2.02 | 2.07 | 2.49 | 2.76 | 1.99 | 2.42 | 2.94 |
| FAM161B      | 1.88 | 1.65 | 2.05 | 1.97 | 2.18 | 2    | 2    | 1.76 |
| CHAC1        | 2.15 | 2.22 | 2.06 | 2.04 | 1.84 | 2    | 1.39 | 1.87 |
| IBA57        | 2.02 | 1.88 | 2.06 | 1.75 | 1.92 | 2    | 2.23 | 1.93 |
| NR4A1        | 1.84 | 1.69 | 2.24 | 1.88 | 2.46 | 2    | 1.91 | 1.95 |
| EFEMP2       | 2.22 | 3.2  | 2.27 | 2.58 | 1.64 | 2    | 2.2  | 2.11 |
| C7orf31      | 2.44 | 1.94 | 2.48 | 2.56 | 2.5  | 2    | 2.37 | 2.16 |
| LIPT1        | 1.48 | 1.45 | 1.85 | 2.16 | 2.05 | 2    | 3.08 | 2.37 |
| TPK1         | 1.84 | 1.58 | 1.98 | 2.13 | 2.22 | 2    | 2.84 | 2.43 |
| IFT46        | 2.93 | 3.29 | 3.14 | 2.93 | 1.55 | 2.01 | 1.2  | 1.67 |
| AMER1        | 1.85 | 1.93 | 2.07 | 1.8  | 1.75 | 2.01 | 2.23 | 2.13 |
| STARD13      | 1.86 | 1.76 | 2.22 | 2.09 | 2.13 | 2.01 | 2.28 | 2.18 |
| GTF2H5       | 2.12 | 2.02 | 2    | 2.39 | 1.76 | 2.01 | 2.6  | 2.44 |
| FRMD3        | 1.8  | 1.74 | 2.26 | 2.01 | 2.5  | 2.01 | 3.1  | 2.56 |
| AKAP12       | 2.7  | 2.13 | 2.89 | 2.95 | 2.02 | 2.01 | 3.15 | 2.56 |
| PRR16        | 2.05 | 1.79 | 2.32 | 2.16 | 2.42 | 2.01 | 2.77 | 2.65 |
| KIAA1551     | 1.65 | 1.36 | 1.9  | 2.32 | 1.91 | 2.01 | 3.8  | 3.16 |
| BFSP1        | 2.14 | 2.05 | 2.02 | 2.1  | 1.98 | 2.02 | 1.83 | 2.13 |
| RMDN2        | 1.99 | 1.74 | 1.4  | 2.48 | 1.66 | 2.02 | 3.07 | 2.19 |
| NHSL1        | 2.16 | 2.16 | 2.11 | 2.38 | 2.08 | 2.02 | 2.37 | 2.22 |
| CSMD1        | 1.93 | 1.88 | 2.03 | 2.27 | 2.07 | 2.02 | 2.1  | 2.3  |
| ZNF430       | 1.4  | 1.35 | 1.97 | 2.45 | 1.67 | 2.02 | 3.77 | 3.06 |
| LOC107985103 | 1.47 | 1.52 | 1.5  | 1.48 | 1.78 | 2.03 | 1.3  | 1.45 |
| GDPD5        | 1.75 | 1.92 | 2.13 | 1.67 | 2.16 | 2.03 | 1.7  | 1.89 |
| ERCC6        | 1.85 | 1.56 | 1.94 | 2.27 | 1.61 | 2.03 | 2.67 | 2.02 |
| ESRP1        | 1.78 | 2.19 | 1.95 | 1.95 | 1.95 | 2.03 | 2.29 | 2.32 |
| BLM          | 1.89 | 1.53 | 2.38 | 2.6  | 2.35 | 2.03 | 3.32 | 2.45 |
| GPR155       | 2.03 | 1.87 | 2.39 | 2.92 | 1.97 | 2.03 | 3.27 | 2.63 |
| FEM1C        | 1.8  | 1.59 | 2.12 | 2.28 | 2.14 | 2.03 | 3.04 | 2.88 |
| LRRC8C       | 2    | 1.92 | 2.2  | 2.89 | 1.98 | 2.03 | 3.33 | 2.95 |
| NOTCH2NL     | 1.98 | 2.4  | 2.18 | 2.27 | 2.35 | 2.04 | 1.91 | 2.05 |
| SEMA6B       | 4.01 | 4.7  | 3.98 | 3.73 | 2.03 | 2.04 | 1.41 | 2.31 |
| ARL6         | 1.81 | 2.18 | 2.1  | 2.09 | 2.03 | 2.04 | 3.24 | 2.41 |
| LNP1         | 2.57 | 2.29 | 2.55 | 2    | 2.11 | 2.04 | 2.63 | 2.76 |
| RASA2        | 1.96 | 1.77 | 2.36 | 2.48 | 2.34 | 2.04 | 3.99 | 2.89 |
| PANK1        | 2.07 | 2.16 | 2.69 | 2.63 | 2.58 | 2.04 | 3.32 | 3.39 |
| HIST2H2BE    | 2.09 | 2.65 | 2.21 | 2.16 | 1.69 | 2.05 | 1.7  | 1.61 |
| CELF2        | 2.26 | 1.57 | 2.43 | 2.39 | 2.45 | 2.05 | 2.76 | 1.96 |
| ARMCX5-      | 2.24 | 1.94 | 1.76 | 2.13 | 2.09 | 2.05 | 1.88 | 2.01 |
| GPRASP2      | 2.43 | 2.36 | 2.52 | 2.53 | 1.91 | 2.05 | 2.41 | 2.09 |
| ZNF713       | 1.83 | 1.98 | 2.07 | 2.54 | 2.31 | 2.05 | 2.67 | 2.25 |
| TRPV1        | 1.83 | 1.98 | 2.07 | 2.54 | 2.31 | 2.05 | 2.67 | 2.25 |
| LOC102724843 | 2.81 | 2.61 | 2.52 | 3.47 | 1.87 | 2.05 | 2.31 | 2.56 |
| ZKSCAN3      | 2.61 | 2.43 | 2.67 | 2.6  | 1.87 | 2.05 | 2.54 | 2.83 |
| LOC101927345 | 2.75 | 1.67 | 2.97 | 4.06 | 3.71 | 2.05 | 5.98 | 4.53 |
| AMIGO1       | 1.82 | 2    | 1.61 | 1.62 | 1.69 | 2.06 | 1.6  | 1.52 |
| SNAI1        | 1.65 | 2.11 | 1.94 | 2.07 | 2.03 | 2.06 | 1.4  | 1.83 |
| PTK2B        | 2.71 | 1.92 | 2.15 | 1.98 | 1.74 | 2.06 | 1.76 | 2.05 |
| SLC2A13      | 1.46 | 1.51 | 1.18 | 1.65 | 1.62 | 2.06 | 2.49 | 2.1  |
| CT55         | 2.38 | 1.67 | 1.66 | 1.38 | 1.81 | 2.06 | 1.83 | 2.26 |
| TUBE1        | 2.12 | 1.88 | 2.25 | 2.45 | 2.17 | 2.06 | 3.47 | 2.49 |
| ZBTB43       | 1.66 | 1.82 | 1.9  | 2.07 | 2.01 | 2.06 | 2.72 | 2.71 |
| SPOPL        | 1.9  | 1.87 | 2.01 | 2.46 | 1.83 | 2.06 | 3.61 | 2.76 |
| TNFRSF6B     | 2.45 | 1.94 | 2.45 | 2.55 | 2.27 | 2.06 | 2.73 | 3.12 |
| ZSCAN20      | 1.62 | 1.95 | 1.92 | 1.9  | 1.91 | 2.07 | 2.07 | 2.09 |
| PAEP         | 1.24 | 1.73 | 1.2  | 1.48 | 2.04 | 2.07 | 1.84 | 2.1  |
| ASTE1        | 1.79 | 1.54 | 2.4  | 2.24 | 2.33 | 2.07 | 2.83 | 2.47 |
| TNFAIP8      | 1.76 | 1.78 | 1.56 | 2.4  | 2.13 | 2.07 | 3.2  | 2.59 |
| SLC22A15     | 1.64 | 1.75 | 1.88 | 2.17 | 2.21 | 2.07 | 3.35 | 2.62 |

|                |      |      |      |      |      |      |      |      |
|----------------|------|------|------|------|------|------|------|------|
| KLHL2          | 2.26 | 2.2  | 2.03 | 2.24 | 2.44 | 2.07 | 2.34 | 2.83 |
| CXorf23        | 1.95 | 1.79 | 2.16 | 2.24 | 1.75 | 2.07 | 3.47 | 3    |
| FZD7           | 3.63 | 3.37 | 3.07 | 3.32 | 2.14 | 2.08 | 2.03 | 2.09 |
| HSB2D          | 2.9  | 3.39 | 3.18 | 3.78 | 1.71 | 2.08 | 2.28 | 2.13 |
| CTC1           | 1.91 | 2.05 | 1.98 | 1.83 | 2.04 | 2.08 | 2.03 | 2.16 |
| C16orf86       | 2.19 | 2.04 | 1.81 | 1.54 | 1.92 | 2.08 | 2.06 | 2.21 |
| PLEKHH1        | 1.95 | 1.73 | 2.2  | 2.07 | 1.8  | 2.08 | 2.65 | 2.27 |
| PLK4           | 1.59 | 1.51 | 1.95 | 1.85 | 1.66 | 2.08 | 3.65 | 2.27 |
| ZNF510         | 1.66 | 1.58 | 2.1  | 2.65 | 1.83 | 2.08 | 3.15 | 2.47 |
| PROCA1         | 1.61 | 1.84 | 2.23 | 1.9  | 2.2  | 2.08 | 2.29 | 2.57 |
| LOC150051      | 3.6  | 2.94 | 3.36 | 2.94 | 2.93 | 2.08 | 1.94 | 2.65 |
| TDRP           | 1.89 | 2.13 | 2.03 | 1.99 | 2.26 | 2.08 | 2.74 | 2.69 |
| NFKBID         | 1.43 | 1.57 | 1.79 | 1.93 | 2.1  | 2.08 | 2.22 | 2.78 |
| ZNF776         | 2.03 | 1.94 | 2.23 | 2.75 | 2.2  | 2.08 | 3.62 | 2.83 |
| KANSL1L        | 1.94 | 1.95 | 2.29 | 3.1  | 1.99 | 2.08 | 3.59 | 3    |
| TEX9           | 2.43 | 2.2  | 2.52 | 2.23 | 1.93 | 2.08 | 3.99 | 3.17 |
| DNAJC25        | 2.41 | 1.81 | 2.74 | 2.61 | 2.76 | 2.08 | 4.13 | 3.27 |
| ZNF33A         | 1.75 | 1.71 | 1.89 | 2.34 | 1.82 | 2.08 | 4.18 | 3.42 |
| CCDC186        | 1.68 | 1.55 | 1.93 | 2.36 | 1.86 | 2.08 | 4.27 | 4.19 |
| DHRS12         | 2.28 | 2.65 | 2.28 | 2.01 | 2.12 | 2.09 | 2.12 | 1.73 |
| MX1            | 5.38 | 5.76 | 5.13 | 5.92 | 2.15 | 2.09 | 2.29 | 1.92 |
| ZNF530         | 2.16 | 1.84 | 2.06 | 1.91 | 2.79 | 2.09 | 2.82 | 1.98 |
| JADE3          | 1.7  | 1.7  | 1.75 | 2.04 | 2.21 | 2.09 | 2.45 | 2.11 |
| SMKR1          | 2.24 | 1.91 | 1.63 | 2.14 | 1.66 | 2.09 | 2.63 | 2.11 |
| MXRA5          | 5.07 | 5    | 5.27 | 5.11 | 2.05 | 2.09 | 2.3  | 2.24 |
| BTBD9          | 1.93 | 2.11 | 2.03 | 2.08 | 2.09 | 2.09 | 2.37 | 2.28 |
| FAM46C         | 1.65 | 1.67 | 1.43 | 1.89 | 1.94 | 2.09 | 2.24 | 2.46 |
| CENPE          | 1.19 | 1.28 | 1.55 | 1.37 | 2.18 | 2.09 | 3.45 | 2.8  |
| KIAA0895       | 2.26 | 2.33 | 2.57 | 2.86 | 2.12 | 2.09 | 3.12 | 2.83 |
| CIPC           | 2.08 | 1.87 | 2.16 | 2.57 | 2.28 | 2.09 | 3.48 | 2.93 |
| DDIAS          | 1.88 | 1.56 | 2.02 | 2.33 | 2.58 | 2.09 | 3.6  | 3.14 |
| FERMT2         | 2.1  | 1.97 | 2.61 | 2.87 | 2.07 | 2.09 | 3.41 | 3.16 |
| VPS13C         | 1.45 | 1.51 | 1.86 | 2.46 | 1.84 | 2.09 | 4.09 | 3.54 |
| HERC6          | 3.89 | 3.48 | 4.29 | 4.46 | 1.9  | 2.1  | 2.55 | 1.86 |
| SMAGP          | 1.37 | 1.61 | 1.65 | 1.66 | 1.82 | 2.1  | 1.58 | 1.95 |
| LOC107984156   | 1.26 | 1.7  | 1.76 | 1.85 | 1.67 | 2.1  | 2.79 | 2.1  |
| CIDEB          | 1.78 | 1.55 | 1.63 | 2    | 1.9  | 2.1  | 2.78 | 2.21 |
| ZNF816-ZNF321P | 1.71 | 1.98 | 1.82 | 2.1  | 1.85 | 2.1  | 2.32 | 2.4  |
| PLEKHA7        | 2.51 | 2.32 | 2.45 | 2.5  | 2.11 | 2.1  | 2.34 | 2.6  |
| ZNF490         | 2.06 | 1.87 | 2.33 | 2.37 | 2.13 | 2.1  | 2.41 | 2.89 |
| TNFSF12        | 1.78 | 1.66 | 1.86 | 1.76 | 1.89 | 2.11 | 1.1  | 1.33 |
| TERT           | 1.86 | 1.8  | 1.9  | 1.98 | 2.03 | 2.11 | 1.83 | 1.83 |
| STAR           | 1.6  | 1.66 | 1.64 | 2    | 1.77 | 2.11 | 1.67 | 2    |
| DISC1          | 2.38 | 2.1  | 2.08 | 2.74 | 2.24 | 2.11 | 2.54 | 2.21 |
| ZNF587B        | 2.08 | 1.71 | 1.97 | 1.95 | 2.13 | 2.11 | 2.39 | 2.54 |
| LDB2           | 1.97 | 2.19 | 1.65 | 2.52 | 2.11 | 2.11 | 2.43 | 2.56 |
| DOC2A          | 1.64 | 1.84 | 2.06 | 1.88 | 2.13 | 2.11 | 2.5  | 2.67 |
| FZD4           | 2.64 | 2.52 | 2.47 | 2.62 | 2.47 | 2.11 | 2.69 | 2.69 |
| FAM155A        | 2    | 1.7  | 2.1  | 2.26 | 2.36 | 2.11 | 2.86 | 2.71 |
| CCDC18         | 1.48 | 1.58 | 1.55 | 2.03 | 1.5  | 2.11 | 3    | 2.74 |
| PELI2          | 1.95 | 1.61 | 2.44 | 2.85 | 1.89 | 2.11 | 3.31 | 2.76 |
| VAMP1          | 2.11 | 1.76 | 2.57 | 2.54 | 2.55 | 2.11 | 2.35 | 2.87 |
| ATM            | 1.58 | 1.69 | 1.86 | 2.45 | 1.96 | 2.11 | 3.81 | 3    |
| TDRD5          | 2.79 | 2.43 | 2.48 | 2.34 | 2.74 | 2.11 | 3.14 | 3.01 |
| ADM5           | 1.83 | 1.48 | 1.92 | 1.73 | 2    | 2.12 | 2.35 | 1.51 |
| HDAC4          | 2.25 | 2.31 | 2    | 2.12 | 2.04 | 2.12 | 1.91 | 1.95 |
| SLC15A2        | 2.02 | 1.87 | 2.12 | 2.23 | 1.85 | 2.12 | 2.27 | 2.09 |
| SFMBT1         | 1.85 | 1.94 | 2.09 | 2.18 | 2.43 | 2.12 | 2.51 | 2.27 |
| GAB2           | 1.79 | 1.93 | 1.94 | 1.82 | 2.13 | 2.12 | 2.14 | 2.34 |
| ZSWIM6         | 1.98 | 1.75 | 2.4  | 2.3  | 2.49 | 2.12 | 2.92 | 2.41 |
| BEX1           | 1.31 | 1.55 | 1.63 | 1.37 | 2.02 | 2.12 | 2.61 | 2.62 |
| FAM169A        | 1.62 | 1.38 | 1.85 | 2.26 | 1.83 | 2.12 | 3.23 | 2.63 |
| FAM71E1        | 2.9  | 2.61 | 2.41 | 1.97 | 2.35 | 2.12 | 2.18 | 2.66 |
| TTC30A         | 2.57 | 2.34 | 2.51 | 2.71 | 2.18 | 2.12 | 2.65 | 2.81 |
| MMP13          | 3.76 | 3.9  | 3.96 | 4.08 | 2.36 | 2.12 | 3.74 | 2.87 |
| NR2F1          | 2.45 | 2.08 | 2.03 | 2.74 | 1.86 | 2.12 | 1.73 | 2.97 |
| ARID4A         | 1.81 | 1.9  | 2.06 | 2.78 | 2.11 | 2.12 | 3.91 | 3.31 |
| CARF           | 2.03 | 1.44 | 2.1  | 2.1  | 2.05 | 2.12 | 3.42 | 3.33 |
| GJC2           | 3.5  | 3.38 | 3.97 | 2.73 | 2.27 | 2.13 | 1.36 | 1.81 |
| HOMER2         | 2.1  | 1.66 | 1.91 | 2    | 1.81 | 2.13 | 1.52 | 2.15 |
| KLF12          | 1.27 | 2.02 | 2.07 | 2.26 | 1.68 | 2.13 | 2.93 | 2.44 |
| MCMDC2         | 2.39 | 2.19 | 2.27 | 2.08 | 2.3  | 2.13 | 2.82 | 2.49 |
| KAT6B          | 2.04 | 1.8  | 2.5  | 2.56 | 2.29 | 2.13 | 3.26 | 2.79 |
| UHRF1BP1L      | 1.63 | 1.68 | 1.91 | 2.23 | 1.98 | 2.13 | 3.19 | 2.92 |
| ZNF483         | 2.24 | 1.68 | 2.37 | 2.66 | 1.98 | 2.13 | 2.55 | 3.4  |
| IFITM10        | 2.48 | 2.83 | 2.47 | 2.63 | 1.95 | 2.14 | 1.76 | 1.71 |
| DLX2           | 1.88 | 2.03 | 1.86 | 1.47 | 2.69 | 2.14 | 1.77 | 1.76 |
| MEX3B          | 2.87 | 2.35 | 2.72 | 2.74 | 2.14 | 2.14 | 1.85 | 1.94 |
| ZBTB8A         | 2.03 | 2.02 | 2.06 | 2.33 | 1.97 | 2.14 | 2.47 | 2.4  |
| FBXO33         | 1.84 | 1.58 | 2    | 1.96 | 2.1  | 2.14 | 2.55 | 2.4  |
| ZNF383         | 1.71 | 1.48 | 1.9  | 2.23 | 2    | 2.14 | 2.71 | 2.5  |
| ISL2           | 2.44 | 2.61 | 2.52 | 1.94 | 2.44 | 2.14 | 2.14 | 2.51 |
| HSPA12A        | 1.82 | 1.98 | 1.85 | 2.24 | 2.27 | 2.14 | 2.6  | 2.51 |
| TIGD7          | 1.93 | 1.51 | 2.58 | 2.6  | 2.59 | 2.14 | 4.47 | 2.68 |
| AASDH          | 1.94 | 1.91 | 2.49 | 2.68 | 2.35 | 2.14 | 2.81 | 2.81 |

|              |      |      |      |      |      |      |      |      |
|--------------|------|------|------|------|------|------|------|------|
| ZNF429       | 2.12 | 1.89 | 2.33 | 2.72 | 1.86 | 2.14 | 3.43 | 2.85 |
| TMEM171      | 1.71 | 2.51 | 2.49 | 1.54 | 1.47 | 2.15 | 1.55 | 1.4  |
| PLEKHG4B     | 1.34 | 1.85 | 1.95 | 1.68 | 1.8  | 2.15 | 1.53 | 1.87 |
| ARHGGEF37    | 2.47 | 2.38 | 2.95 | 2.54 | 1.84 | 2.15 | 2.01 | 2.03 |
| HNRNPH2      | 1.08 | 1.56 | 2.56 | 2.31 | 2.84 | 2.15 | 2.95 | 2.09 |
| ZBTB39       | 2.4  | 2.17 | 2.41 | 2.24 | 2.12 | 2.15 | 1.93 | 2.1  |
| GAREM1       | 2.4  | 1.91 | 2.57 | 2.9  | 1.96 | 2.15 | 2.71 | 2.26 |
| RAB17        | 2.11 | 2.09 | 2.4  | 2.35 | 3.09 | 2.15 | 3.02 | 2.38 |
| ZNF93        | 2.08 | 2.02 | 2.63 | 3.21 | 2.6  | 2.15 | 3.63 | 3.74 |
| NOXO1        | 1.68 | 2.14 | 2.34 | 1.54 | 2.04 | 2.16 | 1.56 | 1.92 |
| C19orf71     | 2.2  | 2.58 | 1.82 | 1.86 | 1.77 | 2.16 | 2.69 | 2.16 |
| TBC1D12      | 2.17 | 1.79 | 1.7  | 2.17 | 1.63 | 2.16 | 2.12 | 2.17 |
| ATXN1        | 2.04 | 1.99 | 2.25 | 2.49 | 2.02 | 2.16 | 2.59 | 2.64 |
| NAP1L3       | 1.98 | 2.15 | 2.37 | 2.4  | 2.3  | 2.16 | 2.92 | 2.82 |
| LOC100129940 | 2.31 | 1.91 | 2.31 | 2.62 | 2.71 | 2.16 | 3.13 | 3.08 |
| TVP23C-CDRT4 | 1.39 | 1.74 | 1.96 | 2.33 | 2    | 2.17 | 2.51 | 1.58 |
| SNX25        | 2.29 | 1.84 | 2.27 | 2.14 | 2.21 | 2.17 | 2.65 | 2.55 |
| BORA         | 1.39 | 1.39 | 2.11 | 1.87 | 2.12 | 2.17 | 3.22 | 2.72 |
| ABHD18       | 1.73 | 1.68 | 2.03 | 2.05 | 2.49 | 2.17 | 3.49 | 2.73 |
| EXOC6        | 2.08 | 2.21 | 2.04 | 2.44 | 2.44 | 2.17 | 3.73 | 2.74 |
| AUTS2        | 2.37 | 2.33 | 2.29 | 2.51 | 2.48 | 2.17 | 2.62 | 3.01 |
| GALNT5       | 2.26 | 2.1  | 2.49 | 2.9  | 2.48 | 2.17 | 2.99 | 3.17 |
| SALL4        | 2.26 | 2.08 | 2.3  | 3.16 | 1.99 | 2.17 | 3.69 | 3.21 |
| BAZZB        | 1.8  | 1.87 | 2.04 | 2.84 | 2.06 | 2.17 | 3.28 | 3.36 |
| 44263        | 2.36 | 2.24 | 1.87 | 2.13 | 2.07 | 2.18 | 2.44 | 2.36 |
| PPP1R3C      | 2.52 | 2.61 | 2.61 | 2.71 | 2.39 | 2.18 | 2.87 | 2.61 |
| SLCO1A2      | 2.38 | 2    | 2.38 | 2.42 | 1.72 | 2.18 | 2.59 | 2.68 |
| PPP2R3A      | 2.11 | 1.73 | 2.23 | 2.83 | 2.21 | 2.18 | 3.81 | 3.22 |
| FAM214A      | 1.91 | 1.86 | 2.33 | 2.52 | 2.25 | 2.18 | 3.73 | 3.31 |
| PTGR1        | 2.79 | 3.23 | 3.59 | 3.53 | 2.58 | 2.18 | 2.37 | 3.46 |
| NCAM2        | 2.28 | 2.41 | 2.28 | 3.24 | 2.79 | 2.18 | 3.65 | 3.49 |
| NLRCS5       | 2.3  | 2.19 | 2.41 | 2.98 | 2.28 | 2.19 | 2.1  | 1.85 |
| ZBTB42       | 2.82 | 3.22 | 2.41 | 2.59 | 2.38 | 2.19 | 1.85 | 2.25 |
| RGS16        | 2.05 | 1.85 | 2.03 | 1.52 | 2.61 | 2.19 | 2.54 | 2.47 |
| PLEKHM3      | 2.21 | 2.06 | 2.31 | 2.31 | 2.52 | 2.19 | 2.99 | 2.71 |
| UBN2         | 1.66 | 1.66 | 1.97 | 2.68 | 1.86 | 2.19 | 3.34 | 2.96 |
| PTX3         | 2.25 | 2.31 | 2.31 | 2.18 | 2.09 | 2.2  | 2.52 | 2.42 |
| BORCS8-MEF2B | 2.55 | 3.01 | 2.41 | 3.05 | 2.45 | 2.2  | 2.22 | 2.6  |
| PDK4         | 2.49 | 2.21 | 3.2  | 3.47 | 1.78 | 2.2  | 3.19 | 2.71 |
| CSPP1        | 1.93 | 1.99 | 2.35 | 2.72 | 2.07 | 2.2  | 3.91 | 3.47 |
| LOC101930090 | 1.45 | 1.71 | 1.36 | 1.7  | 1.68 | 2.21 | 1.25 | 2.06 |
| GLIPR2       | 3.16 | 3.14 | 2.57 | 2.75 | 2.63 | 2.21 | 2.12 | 2.06 |
| DZANK1       | 1.96 | 1.8  | 1.97 | 2.24 | 1.76 | 2.21 | 2.67 | 2.16 |
| PITPNC1      | 2.09 | 2.46 | 2.37 | 2.13 | 2.29 | 2.21 | 2.04 | 2.25 |
| AGPAT4       | 1.87 | 1.9  | 2.2  | 2.5  | 2.28 | 2.21 | 2.83 | 2.48 |
| ADAT2        | 1.85 | 1.9  | 2.46 | 2.01 | 2.39 | 2.21 | 3.05 | 2.5  |
| RASSF3       | 1.8  | 1.98 | 1.78 | 2.15 | 2.35 | 2.21 | 2.49 | 2.63 |
| LMO7         | 1.73 | 1.51 | 1.76 | 2.16 | 2.11 | 2.21 | 3.43 | 2.65 |
| ELAC1        | 3.22 | 2.74 | 2.98 | 3.45 | 2.43 | 2.21 | 2.61 | 2.74 |
| C3orf18      | 2.01 | 1.85 | 2.09 | 1.94 | 2.13 | 2.22 | 1.49 | 1.94 |
| PPFIA3       | 1.64 | 1.95 | 1.48 | 1.6  | 2.05 | 2.22 | 1.46 | 1.97 |
| SLC35G1      | 1.99 | 2.02 | 1.98 | 2.2  | 2.23 | 2.22 | 3.3  | 2.36 |
| IRGQ         | 1.77 | 1.99 | 2.01 | 2.59 | 2.17 | 2.22 | 2.58 | 2.5  |
| SLC22A4      | 2.15 | 2.45 | 2.7  | 2.05 | 2.56 | 2.22 | 2.64 | 2.57 |
| PCDHB16      | 3.08 | 2.53 | 2.48 | 2.81 | 2.18 | 2.22 | 2.95 | 2.88 |
| NBPF20       | 1.66 | 1.71 | 2.07 | 2.32 | 2.4  | 2.22 | 3    | 2.96 |
| TBC1D8B      | 1.93 | 1.82 | 2.54 | 2.37 | 1.64 | 2.22 | 3.4  | 3.14 |
| LOC644249    | 1.59 | 1.03 | 1.21 | 1.91 | 1.19 | 2.23 | 3.25 | 2.04 |
| FRMD5        | 2.1  | 2.02 | 2.75 | 2.96 | 2.8  | 2.23 | 3.53 | 2.71 |
| TIFA         | 2.69 | 2.63 | 2.46 | 3.07 | 2.53 | 2.23 | 3.36 | 3.14 |
| TIGD6        | 2.14 | 2.11 | 2.28 | 2.39 | 2.5  | 2.24 | 2.5  | 2.56 |
| PROS1        | 2.08 | 2.15 | 2.29 | 2.58 | 2.32 | 2.24 | 3.32 | 2.62 |
| AKNA         | 2.49 | 2.74 | 2.45 | 2.52 | 2.46 | 2.24 | 2.25 | 2.63 |
| MAP3K9       | 2.32 | 2.25 | 2.47 | 2.72 | 2.64 | 2.24 | 2.6  | 2.69 |
| MITF         | 1.88 | 2.02 | 1.85 | 2.65 | 2.46 | 2.24 | 3.23 | 2.73 |
| BORCS7       | 2.02 | 1.84 | 2.15 | 3.08 | 1.97 | 2.24 | 3.82 | 2.89 |
| EEA1         | 1.63 | 1.5  | 1.91 | 2.01 | 1.89 | 2.24 | 3.6  | 3.04 |
| SERTAD4      | 3.1  | 2.98 | 3.1  | 3.46 | 3.1  | 2.24 | 2.73 | 3.1  |
| SC5D         | 1.49 | 1.81 | 1.73 | 2.29 | 2.21 | 2.24 | 3.74 | 3.1  |
| SECISBP2L    | 1.99 | 1.76 | 2.27 | 2.62 | 2.07 | 2.24 | 3.41 | 3.29 |
| REST         | 2.26 | 2.05 | 2.61 | 2.98 | 2.39 | 2.24 | 3.75 | 3.45 |
| LEPR         | 2.02 | 2.14 | 2.14 | 2.54 | 2.13 | 2.24 | 4.08 | 3.46 |
| SKIL         | 2.15 | 2.23 | 2.59 | 3.1  | 2.16 | 2.24 | 4.09 | 3.62 |
| LIFR         | 2.11 | 1.89 | 2.53 | 3.07 | 2.51 | 2.24 | 4.5  | 3.66 |
| SLC52A1      | 1.95 | 1.82 | 1.62 | 2.15 | 1.79 | 2.25 | 1.89 | 1.59 |
| ZNF552       | 2.15 | 2.32 | 2.52 | 1.96 | 2.45 | 2.25 | 2.89 | 2.36 |
| FAM171B      | 2.22 | 1.71 | 2.15 | 2.63 | 2.04 | 2.25 | 3.36 | 2.43 |
| NNAT         | 2.4  | 2.64 | 2.66 | 2.55 | 2.65 | 2.25 | 3.26 | 2.51 |
| STRIP2       | 1.58 | 1.41 | 1.97 | 2.27 | 2.06 | 2.25 | 3.02 | 2.64 |
| FKBP7        | 2.26 | 2.01 | 2.21 | 2.33 | 2.04 | 2.25 | 3.26 | 2.85 |

|              |      |      |      |      |      |      |      |      |
|--------------|------|------|------|------|------|------|------|------|
| ZNF23        | 2.22 | 1.58 | 2.23 | 2.63 | 2.25 | 2.25 | 3.94 | 2.97 |
| RNF219       | 2.44 | 2.08 | 2.73 | 3.55 | 2.61 | 2.25 | 3.7  | 3.62 |
| C10orf95     | 2.25 | 2.16 | 2.35 | 2.43 | 2.02 | 2.26 | 2.31 | 2.05 |
| UBASH3B      | 1.64 | 1.73 | 1.78 | 1.9  | 2.38 | 2.26 | 2.54 | 2.39 |
| APOBEC3D     | 2.31 | 2.31 | 2.03 | 2.48 | 2.08 | 2.26 | 2.92 | 2.41 |
| OAS2         | 6.88 | 7.72 | 7.15 | 7.42 | 2.4  | 2.26 | 3.13 | 2.79 |
| LOC102724250 | 1.79 | 1.88 | 2.07 | 2.5  | 2.08 | 2.26 | 3.55 | 2.8  |
| ATG4A        | 2.4  | 1.68 | 2.38 | 2.44 | 2.95 | 2.26 | 3.02 | 3.09 |
| ERCC6L       | 2.21 | 1.73 | 2.78 | 2.68 | 3.01 | 2.26 | 4.01 | 3.23 |
| CCDC84       | 1.77 | 1.58 | 2.09 | 2.11 | 2.52 | 2.27 | 3.44 | 2.65 |
| SAPCD1       | 1.1  | 1.31 | 2.02 | 1.52 | 1.74 | 2.27 | 3.27 | 2.77 |
| SLC19A2      | 2.22 | 2.11 | 2.26 | 2.67 | 2.65 | 2.27 | 3.46 | 2.92 |
| SOX6         | 2.71 | 2.54 | 2.72 | 3.17 | 2.44 | 2.27 | 2.83 | 2.94 |
| LRP1B        | 1.56 | 1.32 | 1.9  | 2.11 | 2.4  | 2.27 | 3.49 | 3.08 |
| IKZF5        | 2.11 | 1.95 | 1.95 | 2.8  | 2.19 | 2.27 | 3.92 | 3.3  |
| SASS6        | 1.92 | 1.47 | 2.06 | 2.75 | 2.11 | 2.27 | 4.46 | 3.56 |
| ANKRD36      | 1.87 | 2.29 | 2.22 | 3.11 | 2.53 | 2.27 | 5.42 | 4.01 |
| IL17D        | 1.35 | 1.62 | 1.84 | 2.14 | 1.9  | 2.28 | 2.26 | 1.85 |
| PDGFB        | 3.26 | 3.03 | 3.67 | 3.73 | 2.02 | 2.28 | 2.3  | 2.05 |
| SOCS1        | 2.12 | 2.61 | 2.45 | 1.83 | 2.53 | 2.28 | 2.17 | 2.06 |
| CDK20        | 2.38 | 2.3  | 1.96 | 2.66 | 2.91 | 2.28 | 1.98 | 2.16 |
| BTN3A3       | 2.19 | 2.47 | 2.41 | 2.29 | 2.06 | 2.28 | 2.6  | 2.22 |
| UCP2         | 2.27 | 3.38 | 2.48 | 2.41 | 2.7  | 2.28 | 1.81 | 2.39 |
| PDE4B        | 2.08 | 2.03 | 1.66 | 2.12 | 2.4  | 2.28 | 3.02 | 2.51 |
| ZRANB3       | 2.25 | 2.11 | 1.98 | 2.44 | 2.44 | 2.28 | 3.21 | 2.56 |
| C4orf33      | 2.52 | 2.92 | 3.04 | 2.76 | 2.38 | 2.28 | 3.71 | 2.71 |
| RAB23        | 2.12 | 1.97 | 2.34 | 2.48 | 2.3  | 2.28 | 3.05 | 2.74 |
| CNOT6L       | 2.09 | 1.94 | 2.51 | 2.76 | 2.36 | 2.28 | 3.06 | 3.02 |
| ZNF708       | 1.72 | 2.25 | 2.37 | 2.44 | 1.91 | 2.28 | 4.46 | 3.17 |
| AFF1         | 2.38 | 1.93 | 2.41 | 3.48 | 2.37 | 2.28 | 3.19 | 3.25 |
| PIGA         | 2.65 | 2.25 | 2.69 | 3.51 | 2.66 | 2.28 | 4.31 | 3.69 |
| LIPT2        | 2.61 | 2.31 | 1.76 | 1.84 | 1.55 | 2.29 | 1.53 | 1.63 |
| BEND3        | 2.09 | 1.92 | 2.01 | 2.21 | 2.09 | 2.29 | 1.87 | 2    |
| WDFY3        | 2.04 | 2.13 | 2.62 | 2.77 | 2.14 | 2.29 | 2.98 | 2.58 |
| CY5D1        | 2.42 | 2.35 | 2.7  | 2.7  | 3.02 | 2.29 | 2.76 | 3.09 |
| ATP8B1       | 3.13 | 2.93 | 3.56 | 4.03 | 2.21 | 2.29 | 3.27 | 3.1  |
| C12orf66     | 2.55 | 2.34 | 2.74 | 2.42 | 2.71 | 2.29 | 2.95 | 3.21 |
| NRL          | 2.48 | 2.41 | 1.99 | 1.64 | 1.87 | 2.3  | 1.84 | 1.51 |
| ANXA9        | 2.4  | 2.19 | 1.74 | 1.74 | 1.84 | 2.3  | 1.93 | 2.23 |
| CDKN1C       | 5.1  | 4.79 | 4.42 | 4.57 | 2.48 | 2.3  | 2.07 | 2.49 |
| NPL          | 2.46 | 2.39 | 2.28 | 2.76 | 2.01 | 2.3  | 3.21 | 2.57 |
| MFSD9        | 2.28 | 2.14 | 2.46 | 2.42 | 2.64 | 2.3  | 2.79 | 2.58 |
| DNMBP        | 2.85 | 2.71 | 2.82 | 3.11 | 2.62 | 2.3  | 2.97 | 2.73 |
| ZNF101       | 2.81 | 2.63 | 2.84 | 3.12 | 2.99 | 2.3  | 2.89 | 2.91 |
| PTBP2        | 2.08 | 1.88 | 2.26 | 2.18 | 2.22 | 2.3  | 4.41 | 3.21 |
| MAGIX        | 1.78 | 1.89 | 1.55 | 1.55 | 2.22 | 2.31 | 1.59 | 1.69 |
| EPHB3        | 2.37 | 2.5  | 1.83 | 2.15 | 2.13 | 2.31 | 1.82 | 2.23 |
| SCLT1        | 1.54 | 1.58 | 1.52 | 2.1  | 1.91 | 2.31 | 1.99 | 2.3  |
| ALPK1        | 1.83 | 2.02 | 2.15 | 2.26 | 2.07 | 2.31 | 2.86 | 2.53 |
| CAP2         | 2.39 | 2.61 | 2.58 | 3.17 | 2.49 | 2.31 | 2.73 | 2.62 |
| CLEC2B       | 2.12 | 2.43 | 2.51 | 2.49 | 3.01 | 2.31 | 3.54 | 2.83 |
| RAB8B        | 2.28 | 2.43 | 2.35 | 3.2  | 2.61 | 2.31 | 3.7  | 3.11 |
| FRAS1        | 2.87 | 2.82 | 2.7  | 3.1  | 2.46 | 2.32 | 2.62 | 2.56 |
| C3orf67      | 2.2  | 1.78 | 2.2  | 2.05 | 1.81 | 2.32 | 2.56 | 2.58 |
| ATG4C        | 1.96 | 1.79 | 2.4  | 2.68 | 2.47 | 2.32 | 4.2  | 2.68 |
| MAGEE1       | 3.02 | 3.34 | 3.1  | 2.86 | 2.54 | 2.32 | 3.01 | 2.93 |
| ZMYM5        | 1.88 | 1.49 | 1.88 | 2.71 | 1.79 | 2.32 | 3.4  | 3.07 |
| ZNF107       | 1.88 | 1.74 | 1.98 | 2.54 | 2.05 | 2.32 | 4.55 | 3.39 |
| PHACTR2      | 2    | 1.83 | 2.21 | 2.81 | 2.53 | 2.32 | 4.56 | 4    |
| IZUMO4       | 2.38 | 1.76 | 2.59 | 2.26 | 1.97 | 2.33 | 2.61 | 1.72 |
| DPF1         | 2.51 | 2.58 | 1.89 | 2.27 | 1.97 | 2.33 | 1.51 | 1.9  |
| ZNF250       | 2.69 | 3.19 | 3.62 | 3.09 | 2.76 | 2.33 | 2.7  | 2.25 |
| BAHCC1       | 2.54 | 2.47 | 2.62 | 2.47 | 2.15 | 2.33 | 1.95 | 2.35 |
| ANK1         | 2.3  | 2.34 | 2.11 | 2.18 | 2.59 | 2.33 | 2.54 | 2.59 |
| TLCD2        | 2.16 | 2.4  | 2.52 | 2.76 | 2.34 | 2.33 | 2.47 | 2.65 |
| MMMP16       | 1.71 | 2.06 | 1.83 | 2.27 | 1.89 | 2.33 | 3.32 | 3.05 |
| UBL3         | 1.86 | 1.99 | 2.15 | 2.56 | 2.77 | 2.33 | 3.55 | 3.14 |
| TTC30B       | 2.56 | 2.74 | 3.3  | 2.94 | 2.25 | 2.33 | 3.23 | 3.51 |
| TMEM267      | 2.34 | 2.53 | 2.26 | 2.71 | 2.48 | 2.33 | 4.14 | 3.77 |
| CPEB2        | 2.92 | 3.14 | 3.37 | 3.91 | 2.84 | 2.33 | 3.76 | 3.93 |
| CCDC61       | 2.44 | 2.13 | 2.07 | 1.93 | 1.93 | 2.34 | 1.62 | 1.96 |
| PPP1R1B      | 2.95 | 4.18 | 2.71 | 2.88 | 1.7  | 2.34 | 1.65 | 2.25 |
| CARD8        | 1.63 | 2.42 | 2.43 | 2.31 | 2.5  | 2.34 | 3.65 | 2.53 |
| DLG4         | 2.65 | 2.44 | 2.7  | 2.73 | 1.91 | 2.34 | 2.21 | 2.54 |
| VLDLR        | 3.72 | 3.61 | 4.27 | 3.63 | 1.97 | 2.34 | 2.78 | 2.55 |
| WWC1         | 1.87 | 2.08 | 2.1  | 1.9  | 2.48 | 2.34 | 2.07 | 2.7  |
| SHPRH        | 1.99 | 1.83 | 2.1  | 3.01 | 2.3  | 2.34 | 4.27 | 3.67 |
| CTSV         | 2.35 | 1.96 | 2.51 | 2.6  | 2.49 | 2.35 | 2.43 | 2.55 |
| RHOBTB1      | 1.89 | 2.31 | 2.78 | 2.7  | 2.41 | 2.35 | 2.52 | 2.67 |
| ZNF227       | 2.18 | 1.97 | 2.73 | 2.61 | 2.64 | 2.35 | 3.45 | 2.87 |
| PRRT2        | 2.39 | 2.08 | 2.31 | 2.47 | 2.11 | 2.35 | 3.61 | 3.19 |
| TTC33        | 2.19 | 1.92 | 2.55 | 2.7  | 2.66 | 2.35 | 3.72 | 3.27 |
| WDR35        | 1.79 | 1.36 | 2.56 | 2.39 | 2.36 | 2.35 | 3.87 | 3.43 |
| ZBTB24       | 2.33 | 3.19 | 2.6  | 3.05 | 2.55 | 2.35 | 3.7  | 3.64 |
| ZC4H2        | 2.04 | 2.49 | 2.18 | 2.2  | 2.21 | 2.36 | 1.89 | 2.08 |
| IL11         | 2.01 | 2.18 | 1.52 | 1.9  | 2.83 | 2.36 | 2.49 | 2.64 |
| MED14OS      | 3.46 | 2.7  | 2.47 | 3.53 | 2.79 | 2.36 | 2.39 | 2.72 |

|              |      |      |      |      |      |      |      |      |
|--------------|------|------|------|------|------|------|------|------|
| ZNF440       | 2.22 | 1.84 | 2.63 | 2.89 | 2.51 | 2.36 | 4.09 | 2.89 |
| PCDH20       | 3.48 | 3.08 | 3.41 | 3.34 | 2.12 | 2.36 | 3.14 | 3    |
| ZNF773       | 2.78 | 2.65 | 2.74 | 3.58 | 2.73 | 2.36 | 3.18 | 3.15 |
| TMEM67       | 2.2  | 1.8  | 2.47 | 2.61 | 2.2  | 2.36 | 3.55 | 3.3  |
| CD302        | 2.46 | 2.19 | 2.41 | 3.56 | 2.9  | 2.36 | 4.46 | 3.51 |
| SGTB         | 1.92 | 1.78 | 2.31 | 2.63 | 2.49 | 2.36 | 4.27 | 3.75 |
| ZNF550       | 1.96 | 1.78 | 2.49 | 2.53 | 2.5  | 2.36 | 4.87 | 3.8  |
| MOB1B        | 2.15 | 2.19 | 2.74 | 2.92 | 2.12 | 2.36 | 4.34 | 3.94 |
| LOC100996842 | 2.32 | 2.69 | 2.8  | 2.23 | 2.58 | 2.37 | 1.74 | 1.66 |
| LOC107985388 | 2.4  | 1.9  | 2.29 | 1.91 | 2.05 | 2.37 | 2.14 | 2.04 |
| ATP6V0A2     | 1.83 | 1.82 | 2.24 | 2.31 | 2.35 | 2.37 | 2.69 | 2.56 |
| C4orf46      | 2.19 | 1.99 | 2.08 | 2.52 | 2.17 | 2.37 | 3.14 | 2.64 |
| DHFR1L1      | 2.22 | 1.98 | 2.21 | 2.46 | 2.88 | 2.37 | 3.5  | 2.74 |
| PER2         | 2.4  | 2.51 | 2.75 | 2.66 | 2.34 | 2.37 | 2.71 | 2.94 |
| SPOCK3       | 3.3  | 3.34 | 2.98 | 4.06 | 2.55 | 2.37 | 3.05 | 3.21 |
| ANGPT1       | 2.04 | 2.08 | 2.61 | 2.48 | 2.1  | 2.37 | 4.14 | 3.21 |
| FOXO4        | 2.45 | 3.09 | 2.75 | 2.51 | 2.89 | 2.37 | 2.46 | 3.33 |
| MYO9A        | 1.86 | 1.69 | 2.28 | 2.84 | 2.37 | 2.37 | 3.52 | 3.36 |
| S100A4       | 3.22 | 3.04 | 2.43 | 2.38 | 2.98 | 2.37 | 3.91 | 3.51 |
| ADRB2        | 2.12 | 2.24 | 2.07 | 1.95 | 2.2  | 2.38 | 2.41 | 2.58 |
| SLX4IP       | 2.05 | 1.95 | 2.2  | 3.24 | 2.6  | 2.38 | 3.57 | 3.13 |
| PCLO         | 2.22 | 2.01 | 2.66 | 2.87 | 2.27 | 2.38 | 3.61 | 3.31 |
| ATG2B        | 2.36 | 1.9  | 2.41 | 2.77 | 2.54 | 2.38 | 4.19 | 3.58 |
| KIAA1715     | 2.24 | 2.13 | 2.7  | 3.15 | 2.73 | 2.38 | 4.08 | 3.64 |
| SP4          | 2.46 | 2.09 | 2.87 | 3.99 | 2.82 | 2.38 | 4.15 | 3.82 |
| C2orf69      | 1.88 | 1.97 | 2.4  | 2.52 | 2.36 | 2.38 | 3.74 | 3.89 |
| GDPGP1       | 2.67 | 2.34 | 2.19 | 1.95 | 2.06 | 2.39 | 2.04 | 2.21 |
| ZNF57        | 2.01 | 2.08 | 2.32 | 2.44 | 2.53 | 2.39 | 2.82 | 2.5  |
| PANO1        | 1.66 | 1.83 | 1.77 | 1.76 | 1.96 | 2.39 | 2.16 | 2.56 |
| SIX4         | 2.4  | 1.89 | 2.37 | 2.93 | 2.03 | 2.39 | 3.09 | 2.81 |
| CEP295       | 1.81 | 1.64 | 2.19 | 2.58 | 2.17 | 2.39 | 4.05 | 3.46 |
| ZNF493       | 2.18 | 1.95 | 2.09 | 2.73 | 2.12 | 2.39 | 4.71 | 3.51 |
| THAP6        | 2.27 | 1.83 | 2.27 | 2.86 | 2.43 | 2.39 | 4.23 | 3.83 |
| LYPD1        | 2.46 | 3    | 3.3  | 2.67 | 2.69 | 2.4  | 2.09 | 1.63 |
| SPDYE17      | 2.45 | 2.28 | 2.25 | 3.1  | 2.97 | 2.4  | 3.21 | 2.58 |
| ZNF699       | 2.53 | 2.18 | 2.76 | 2.85 | 2.94 | 2.4  | 4.14 | 3.24 |
| ANKRD26      | 1.65 | 2.03 | 2.11 | 2.59 | 2.39 | 2.4  | 4.04 | 3.27 |
| ZNF268       | 2.23 | 2.06 | 2.69 | 2.74 | 2.6  | 2.4  | 4.14 | 3.49 |
| ANKRD46      | 2.68 | 2.99 | 3.26 | 3.51 | 2.88 | 2.4  | 3.92 | 3.71 |
| CNIH2        | 2.37 | 2.19 | 2.63 | 2.16 | 1.89 | 2.41 | 2.06 | 1.99 |
| PDLIM3       | 2.28 | 2.45 | 2.38 | 2.37 | 2.38 | 2.41 | 2.06 | 2.35 |
| ALX3         | 1.97 | 2.14 | 2.24 | 2.49 | 2.48 | 2.41 | 2.62 | 2.66 |
| KATNAL1      | 2.15 | 1.82 | 2.36 | 2.68 | 2.46 | 2.41 | 3.25 | 3.09 |
| STAMBPL1     | 3.29 | 2.23 | 3.5  | 3.64 | 2.07 | 2.41 | 3.81 | 3.15 |
| MAP9         | 2.1  | 2.17 | 2.13 | 2.79 | 2.46 | 2.41 | 3.34 | 3.25 |
| ZNF507       | 1.83 | 1.74 | 2.49 | 3.28 | 2.74 | 2.41 | 4.9  | 3.83 |
| APC          | 2.11 | 2    | 2.59 | 3.29 | 2.57 | 2.41 | 5.05 | 4.17 |
| FAM132B      | 2.02 | 2.09 | 1.92 | 1.92 | 2.3  | 2.42 | 1.54 | 1.64 |
| TYMP         | 2.47 | 3.09 | 3.07 | 2.44 | 2.48 | 2.42 | 1.68 | 1.92 |
| ANKDD1A      | 1.8  | 1.9  | 2.03 | 2.12 | 1.88 | 2.42 | 2.57 | 2.15 |
| MAPK8IP2     | 1.72 | 1.64 | 1.63 | 1.52 | 3.06 | 2.42 | 2.39 | 2.33 |
| FAM76A       | 1.81 | 1.78 | 2.52 | 2.42 | 2.35 | 2.42 | 2.95 | 2.62 |
| TIRAP        | 2.01 | 2.24 | 2.14 | 2.18 | 2.27 | 2.42 | 2.17 | 2.98 |
| ITPR1        | 2.46 | 2.14 | 2.6  | 2.87 | 2.59 | 2.42 | 2.9  | 3.01 |
| SYNC         | 1.52 | 2.21 | 1.8  | 2.13 | 2.79 | 2.42 | 2.58 | 3.18 |
| ARID2        | 2.8  | 2.26 | 3.06 | 3.81 | 2.74 | 2.42 | 3.9  | 3.39 |
| DUSP28       | 2.05 | 2.05 | 1.66 | 2.41 | 1.73 | 2.43 | 1.6  | 2.09 |
| NXPH4        | 4.95 | 4.42 | 4.36 | 3.94 | 1.99 | 2.43 | 1.85 | 2.38 |
| TXNDC16      | 1.98 | 1.7  | 2.27 | 2.75 | 2.27 | 2.43 | 3.63 | 2.65 |
| RAPH1        | 2.08 | 1.84 | 2.14 | 2.5  | 2.6  | 2.43 | 3.1  | 2.71 |
| CRIP1        | 2.71 | 3.04 | 2.17 | 3.1  | 2.87 | 2.43 | 1.7  | 2.96 |
| POLE2        | 2.97 | 3.19 | 3.19 | 3.83 | 2.38 | 2.43 | 5.09 | 3.08 |
| VCPKMT       | 1.95 | 1.85 | 2.76 | 2.63 | 2.8  | 2.43 | 4.69 | 3.21 |
| ZNF34        | 2.57 | 2.48 | 2.35 | 2.81 | 2.32 | 2.43 | 2.92 | 3.43 |
| GK5          | 2.12 | 2.01 | 2.29 | 2.73 | 2.29 | 2.43 | 3.93 | 3.47 |
| HSD3B7       | 2.64 | 2.62 | 2.92 | 1.8  | 1.83 | 2.44 | 2.18 | 2.04 |
| ITPKA        | 2.78 | 2.59 | 3.26 | 2.95 | 2.27 | 2.44 | 2.28 | 2.43 |
| OTUD1        | 2.8  | 2.55 | 2.48 | 2.91 | 2.66 | 2.44 | 2.83 | 2.6  |
| CHMP4C       | 2.26 | 2.07 | 2.49 | 2.42 | 2.64 | 2.44 | 3.28 | 2.63 |
| ARHGEF28     | 2.63 | 2.7  | 3.15 | 3.13 | 3.17 | 2.44 | 3.72 | 2.91 |
| RHBDL2       | 2.23 | 2.57 | 2.3  | 3    | 2.91 | 2.44 | 3.42 | 3.01 |
| EIF5A2       | 1.95 | 1.72 | 2.33 | 2.56 | 2.41 | 2.44 | 3.43 | 3.23 |
| BRIP1        | 2.2  | 2.01 | 2.76 | 3.44 | 2.56 | 2.44 | 4.31 | 3.5  |
| LANCL2       | 2.08 | 2.42 | 2.21 | 2.16 | 1.9  | 2.45 | 2    | 2.03 |
| SLC9B2       | 1.83 | 1.79 | 2.19 | 2.05 | 2.36 | 2.45 | 2.99 | 2.45 |
| TOX3         | 2.41 | 1.88 | 2.54 | 2.82 | 2.42 | 2.45 | 3.1  | 2.94 |
| C12orf76     | 2.71 | 3.17 | 2.8  | 3.58 | 3.22 | 2.45 | 3.15 | 3.14 |
| RELL1        | 2.19 | 2.41 | 2.39 | 2.92 | 2.71 | 2.45 | 3.06 | 3.7  |
| FICD         | 1.85 | 1.79 | 2.26 | 2.56 | 1.94 | 2.46 | 1.87 | 1.88 |
| CENPP        | 2.2  | 2.06 | 2.45 | 2.04 | 2.88 | 2.46 | 2.62 | 2.12 |
| FIBCD1       | 1.78 | 1.97 | 1.94 | 2.07 | 2.36 | 2.46 | 1.96 | 2.36 |
| ACVR2B       | 2.06 | 2.01 | 2.42 | 2.85 | 2.44 | 2.46 | 2.92 | 2.82 |
| S1PR4        | 1.22 | 1.62 | 1.37 | 1.81 | 2.3  | 2.46 | 2.84 | 2.85 |
| SH3YL1       | 1.51 | 1.14 | 1.53 | 1.75 | 2.13 | 2.46 | 3.21 | 2.92 |

|              |      |      |      |      |      |      |      |      |
|--------------|------|------|------|------|------|------|------|------|
| RAD54B       | 2.34 | 2.18 | 2.46 | 2.49 | 2.56 | 2.46 | 3.96 | 3.17 |
| COLGALT2     | 3.51 | 3.73 | 3.72 | 3.73 | 2.4  | 2.46 | 2.56 | 3.18 |
| ZNF320       | 2.27 | 2.01 | 2.55 | 3.08 | 2.33 | 2.46 | 3.76 | 3.18 |
| NEIL3        | 2.44 | 2.15 | 2.82 | 2.76 | 3.22 | 2.46 | 3.59 | 3.24 |
| CASP8AP2     | 1.97 | 1.87 | 2.58 | 3.07 | 2.27 | 2.46 | 4.82 | 3.68 |
| GBX2         | 2.44 | 2.34 | 2.33 | 2.62 | 2.27 | 2.47 | 1.79 | 1.85 |
| TRPV4        | 2.75 | 2.94 | 2.9  | 2.79 | 1.92 | 2.47 | 1.36 | 1.89 |
| PCDHA3       | 2.19 | 1.63 | 2.37 | 1.87 | 2.34 | 2.47 | 1.95 | 2.28 |
| RGL4         | 2.94 | 3.18 | 3.21 | 2.97 | 3.12 | 2.47 | 4.02 | 3.13 |
| FGF1         | 1.86 | 1.72 | 2.4  | 1.87 | 2.42 | 2.47 | 2.97 | 3.23 |
| LAMTOR3      | 2.27 | 2.21 | 2.98 | 2.83 | 2.92 | 2.47 | 3.84 | 3.45 |
| FAXC         | 2.38 | 2.18 | 2.08 | 1.9  | 2.26 | 2.48 | 2.77 | 1.58 |
| C14orf169    | 2.08 | 2.61 | 2.34 | 1.97 | 2.43 | 2.48 | 2.52 | 2.31 |
| TTC12        | 2.31 | 2.34 | 2.32 | 2.27 | 2.18 | 2.48 | 2.28 | 2.38 |
| TLE4         | 3.1  | 3.3  | 2.84 | 3.29 | 2.56 | 2.48 | 3.05 | 2.75 |
| RAB40A       | 2.2  | 1.42 | 2.41 | 2.35 | 2.4  | 2.48 | 2.75 | 2.78 |
| ZNF197       | 2.43 | 2.39 | 2.72 | 3.42 | 2.24 | 2.48 | 3.42 | 3.04 |
| CEP290       | 1.88 | 2.03 | 2.07 | 2.41 | 2.41 | 2.48 | 4.12 | 3.46 |
| DEPDC7       | 2.46 | 2.22 | 2.74 | 2.66 | 2.84 | 2.48 | 3.96 | 3.58 |
| ECM1         | 1.88 | 1.7  | 1.69 | 1.64 | 2.09 | 2.49 | 1.58 | 1.91 |
| HOXA4        | 3.27 | 2.96 | 2.62 | 2.73 | 2.83 | 2.49 | 1.99 | 1.91 |
| KCNH3        | 2.05 | 2.36 | 2.15 | 1.84 | 2.43 | 2.49 | 2.07 | 2.27 |
| MRAS         | 2.19 | 2.26 | 2.57 | 2.63 | 2.25 | 2.49 | 2.2  | 2.52 |
| SMIM1        | 3.22 | 3.81 | 3.52 | 3.29 | 1.69 | 2.49 | 1.94 | 2.77 |
| CRISPLD1     | 2.79 | 2.15 | 2.58 | 2.95 | 2.2  | 2.49 | 3    | 2.95 |
| RPGRIPL1L    | 1.96 | 2.04 | 2.11 | 2.46 | 2.3  | 2.49 | 3.46 | 3.25 |
| CEP19        | 2.55 | 2.14 | 2.69 | 2.81 | 2.54 | 2.49 | 3.23 | 3.39 |
| SLF1         | 2.28 | 2.45 | 2.74 | 3.22 | 2.34 | 2.49 | 4.95 | 3.47 |
| MTERF2       | 2.14 | 2.34 | 2.28 | 3.25 | 2.78 | 2.49 | 3.8  | 3.5  |
| CA5B         | 2.3  | 2.29 | 2.36 | 2.58 | 2.52 | 2.49 | 2.83 | 3.52 |
| GULP1        | 2.19 | 3.28 | 2.98 | 3.41 | 2.63 | 2.49 | 3.95 | 3.57 |
| SEMA4G       | 2.29 | 2.64 | 2.25 | 2.48 | 2.27 | 2.5  | 2.14 | 2.47 |
| APOM         | 3.01 | 3.06 | 3.21 | 3.01 | 2.92 | 2.5  | 2.69 | 2.7  |
| ZNF586       | 2.45 | 2.6  | 3.21 | 2.61 | 2.93 | 2.5  | 3.41 | 2.74 |
| SAMD14       | 3.34 | 3.49 | 3.37 | 3.02 | 2.66 | 2.5  | 2.33 | 2.77 |
| ESCO2        | 1.8  | 1.51 | 2.45 | 3.42 | 2.08 | 2.5  | 4.78 | 2.77 |
| ZXDB         | 2.45 | 2.62 | 2.64 | 2.5  | 2.55 | 2.5  | 2.7  | 2.79 |
| RFXAP        | 2.41 | 2.04 | 2.88 | 3.19 | 2.25 | 2.5  | 3.89 | 2.92 |
| ALG9         | 2.28 | 2.49 | 3.11 | 3.05 | 2.73 | 2.5  | 2.79 | 2.96 |
| USP49        | 2.35 | 2    | 2.63 | 3.23 | 2.58 | 2.5  | 3.92 | 3.29 |
| TSPAN12      | 2.52 | 2.63 | 2.55 | 3.07 | 2.65 | 2.5  | 3.53 | 3.43 |
| MANEA        | 2.55 | 2.91 | 3.07 | 3.61 | 2.55 | 2.5  | 4.5  | 3.48 |
| DDX60        | 4.34 | 4    | 4.85 | 6.01 | 2.44 | 2.5  | 4.96 | 3.81 |
| KIN          | 3.28 | 3.29 | 2.93 | 3.64 | 3.13 | 2.5  | 3.97 | 4    |
| TNFSF10      | 3.86 | 4.07 | 4.92 | 6.1  | 3.35 | 2.5  | 4.57 | 4.87 |
| SELM         | 3.28 | 3.42 | 2.67 | 2.17 | 1.95 | 2.51 | 1.29 | 1.29 |
| CHRN1        | 2.67 | 3.29 | 2.93 | 2.7  | 2.36 | 2.51 | 2.88 | 2.23 |
| ZSWIM3       | 2.92 | 2.63 | 2.89 | 2.74 | 2.45 | 2.51 | 2.14 | 2.41 |
| NFIA         | 2.16 | 1.94 | 2.33 | 2.94 | 2.4  | 2.51 | 2.88 | 2.83 |
| TSTD3        | 2.62 | 1.88 | 1.96 | 2.64 | 2.42 | 2.51 | 3.05 | 2.99 |
| UNC5D        | 3.42 | 3    | 3.73 | 4    | 2.3  | 2.51 | 3.12 | 3.02 |
| ATP7A        | 2.22 | 2.09 | 2.71 | 3.19 | 2.46 | 2.51 | 4.11 | 3.47 |
| HEATR5A      | 2.38 | 1.89 | 2.2  | 2.77 | 2.38 | 2.51 | 4.02 | 3.48 |
| LOC107984799 | 2.45 | 2.57 | 1.93 | 2.45 | 2.33 | 2.52 | 1.72 | 2.27 |
| CCDC120      | 3.03 | 2.82 | 2.64 | 2.84 | 2.7  | 2.52 | 2.39 | 2.32 |
| RRAGD        | 1.74 | 1.44 | 2.2  | 1.91 | 2.3  | 2.52 | 2.54 | 2.44 |
| C11orf71     | 3.47 | 2.79 | 3.16 | 3.04 | 2.08 | 2.52 | 2.2  | 2.8  |
| TAF4B        | 1.97 | 1.73 | 2.24 | 2.6  | 2.77 | 2.52 | 2.99 | 2.93 |
| TCHP         | 2.63 | 2.28 | 2.42 | 2.8  | 2.55 | 2.52 | 3.04 | 2.98 |
| WDR7         | 2.63 | 2.44 | 2.73 | 2.91 | 2.85 | 2.52 | 3.22 | 3.07 |
| NMU          | 2.89 | 2.07 | 2.68 | 2.43 | 3.67 | 2.52 | 2.9  | 3.2  |
| DCC          | 1.73 | 2.49 | 2.18 | 2.5  | 2.31 | 2.52 | 3.19 | 3.23 |
| FAM102B      | 1.8  | 1.72 | 2.33 | 2.94 | 2.68 | 2.52 | 4.14 | 3.49 |
| MIS18BP1     | 2.35 | 2.2  | 2.82 | 2.59 | 2.94 | 2.52 | 4.93 | 3.81 |
| STEAP2       | 1.83 | 1.94 | 1.96 | 2.91 | 2.31 | 2.52 | 3.74 | 3.84 |
| JMY          | 2.13 | 2.16 | 3.06 | 3.57 | 2.77 | 2.52 | 4.72 | 3.97 |
| CGB7         | 1.91 | 2.21 | 1.83 | 2.18 | 3.09 | 2.53 | 3.1  | 2.22 |
| PIK3R3       | 2.47 | 2.67 | 2.52 | 2.59 | 2.81 | 2.53 | 2.85 | 3.15 |
| GRIK2        | 1.99 | 2.39 | 2.48 | 3.06 | 2.26 | 2.53 | 3.63 | 3.26 |
| DNA2         | 2.22 | 1.96 | 2.69 | 3    | 2.7  | 2.53 | 4.74 | 3.28 |
| CREBRF       | 2.33 | 1.89 | 1.96 | 2.73 | 2.43 | 2.53 | 3.63 | 3.39 |
| FAAH2        | 1.86 | 1.96 | 2.28 | 3.55 | 2.17 | 2.53 | 4.48 | 3.58 |
| ZNF431       | 2.09 | 1.98 | 2.13 | 3.03 | 2.47 | 2.53 | 4.74 | 4.48 |
| KLF15        | 1.4  | 1.57 | 1.78 | 2.16 | 3.14 | 2.54 | 2.11 | 1.77 |
| DUSP1        | 3.81 | 3.46 | 2.83 | 2.87 | 2.44 | 2.54 | 2.51 | 2.04 |
| 44440        | 2.99 | 3.11 | 3.53 | 2.62 | 2.68 | 2.54 | 2.3  | 2.18 |
| CAMK2B       | 4.1  | 4.44 | 4.01 | 4.11 | 2.01 | 2.54 | 2.27 | 2.32 |
| FOLR1        | 2.54 | 2.76 | 1.92 | 2.92 | 1.96 | 2.54 | 1.14 | 2.68 |
| MAGEH1       | 3.42 | 3.62 | 3.52 | 3.19 | 2.5  | 2.54 | 2.92 | 3.42 |
| NFKB1Z       | 2.91 | 2.49 | 3.14 | 3.73 | 2.89 | 2.54 | 4.17 | 3.7  |
| ZNF84        | 2.6  | 2.32 | 3.19 | 3.79 | 2.54 | 2.54 | 5.42 | 4.29 |
| FAM135A      | 2.24 | 2.1  | 2.68 | 3.03 | 2.4  | 2.54 | 5.31 | 4.55 |
| CFB          | 4.82 | 4.15 | 4.89 | 4.22 | 2.47 | 2.55 | 2.52 | 1.9  |
| MYRF         | 2.87 | 3.03 | 2.83 | 2.7  | 2.53 | 2.55 | 2.33 | 2.62 |
| ERN1         | 2.76 | 2.42 | 2.43 | 2.33 | 2.42 | 2.55 | 2.51 | 2.76 |

|              |      |      |      |      |      |      |      |      |
|--------------|------|------|------|------|------|------|------|------|
| CENPJ        | 2.31 | 2.04 | 2.25 | 3.07 | 2.32 | 2.55 | 4.31 | 3.46 |
| TGDS         | 2.71 | 2.4  | 3.45 | 3.73 | 3.15 | 2.55 | 4.4  | 4.38 |
| RWDD2A       | 2.06 | 2.05 | 2.29 | 2.49 | 2.45 | 2.56 | 2.84 | 2.37 |
| APOD         | 3.55 | 4.85 | 4.63 | 4.82 | 2.51 | 2.56 | 2.26 | 2.46 |
| HOXA6        | 2.7  | 1.95 | 3.02 | 2.31 | 2.87 | 2.56 | 2.36 | 2.64 |
| GRTF1        | 2.74 | 2.69 | 2.76 | 2.9  | 2.2  | 2.56 | 2.76 | 2.65 |
| GYG2         | 2.8  | 2.39 | 2.41 | 2.71 | 2.8  | 2.56 | 2.51 | 2.72 |
| KDELC2       | 2.55 | 2.13 | 2.42 | 3.78 | 2.35 | 2.56 | 3.31 | 2.88 |
| PRDM15       | 2.03 | 2.12 | 2.27 | 2.47 | 2.99 | 2.56 | 2.96 | 2.95 |
| SCAPER       | 2.02 | 1.83 | 2.29 | 2.74 | 2.68 | 2.56 | 3.61 | 3.38 |
| RTN4R        | 2.9  | 3.59 | 3.01 | 2.01 | 2.28 | 2.57 | 2.1  | 2.12 |
| TMC4         | 3.08 | 2.86 | 2.82 | 3.2  | 3.03 | 2.57 | 2.37 | 2.36 |
| MAPK13       | 2.09 | 2.09 | 2.08 | 2.12 | 2.51 | 2.57 | 2.57 | 2.42 |
| GPC2         | 2.27 | 2.43 | 2.39 | 2.92 | 2.83 | 2.57 | 2.92 | 2.67 |
| SALL1        | 2.87 | 2.76 | 2.5  | 2.98 | 2.36 | 2.57 | 2.51 | 3.1  |
| CDKN2AIP     | 2.43 | 2.58 | 2.67 | 2.87 | 2.75 | 2.57 | 3.54 | 3.16 |
| TMCC1        | 2.6  | 2.53 | 2.87 | 3.12 | 2.53 | 2.57 | 3.34 | 3.25 |
| ZNF654       | 2.36 | 2.32 | 2.38 | 3.03 | 2.39 | 2.57 | 4.06 | 3.57 |
| FAM86B2      | 3.03 | 3.92 | 2.82 | 4.16 | 3.41 | 2.57 | 3.09 | 3.62 |
| CEP350       | 2.26 | 2.01 | 2.87 | 3.7  | 2.64 | 2.57 | 5.43 | 4.21 |
| BIK          | 1.71 | 1.86 | 1.29 | 1.9  | 2.21 | 2.58 | 2.22 | 1.79 |
| TMEM145      | 2.6  | 3.06 | 2.85 | 2.63 | 2.14 | 2.58 | 2.81 | 1.9  |
| OGDHL        | 1.39 | 1.56 | 1.6  | 1.53 | 2.41 | 2.58 | 2.41 | 2.52 |
| JAZF1        | 1.94 | 2.11 | 1.96 | 2.08 | 2.37 | 2.58 | 3.3  | 3.01 |
| USP38        | 2.41 | 2.45 | 2.58 | 3.22 | 2.65 | 2.58 | 3.35 | 3.48 |
| NFXL1        | 2.39 | 2.09 | 2.73 | 3.41 | 2.93 | 2.58 | 4.56 | 3.68 |
| ALMS1        | 2.14 | 1.95 | 2.64 | 3.19 | 2.64 | 2.58 | 4.22 | 3.76 |
| ERBB2        | 2.48 | 2.59 | 2.36 | 2.12 | 2.18 | 2.59 | 2.32 | 2.05 |
| B3GALT4      | 3.52 | 3.29 | 3.55 | 3.42 | 1.76 | 2.59 | 2.05 | 2.42 |
| TENM4        | 2.9  | 2.97 | 2.84 | 3.05 | 2.38 | 2.59 | 2.57 | 2.66 |
| DNAL1        | 2.19 | 2.18 | 2.26 | 2.69 | 2.48 | 2.59 | 2.98 | 2.75 |
| C11orf57     | 2.28 | 2.24 | 1.92 | 2.44 | 2.5  | 2.59 | 3.01 | 2.85 |
| AADAT        | 2    | 1.96 | 2.4  | 2.65 | 2.17 | 2.59 | 3.71 | 3.07 |
| MND1         | 2.44 | 3.68 | 2.86 | 3.58 | 3.18 | 2.59 | 3.32 | 3.12 |
| MBLAC2       | 2.76 | 2.72 | 2.68 | 3.22 | 2.81 | 2.59 | 3.74 | 3.12 |
| LRRC37B      | 3    | 3.03 | 2.9  | 3.56 | 3.11 | 2.59 | 3.95 | 3.12 |
| TRPC1        | 2.14 | 2.18 | 2.18 | 3.16 | 2.39 | 2.59 | 4.44 | 3.76 |
| HOXA1        | 2.69 | 2.89 | 2.36 | 2.63 | 2.85 | 2.6  | 2.51 | 2.3  |
| LOXL4        | 3.08 | 3.03 | 2.69 | 2.46 | 2.72 | 2.6  | 2.36 | 2.46 |
| ZBTB14       | 2.55 | 2.07 | 3.08 | 2.83 | 2.64 | 2.6  | 3.35 | 2.73 |
| XYLB         | 2.39 | 2.75 | 2.76 | 2.8  | 2.63 | 2.6  | 3.58 | 3.07 |
| BCDIN3D      | 2.47 | 3    | 3.02 | 2.82 | 3.25 | 2.6  | 3.39 | 3.37 |
| TRIP11       | 2.34 | 2.11 | 2.95 | 3.32 | 2.5  | 2.6  | 4.96 | 3.98 |
| FDX1         | 2.26 | 2.26 | 2.48 | 2.22 | 2.73 | 2.61 | 2.71 | 2.65 |
| ZNF512       | 2.67 | 2.52 | 3.06 | 2.96 | 2.61 | 2.61 | 3    | 3    |
| RNF43        | 3.22 | 3.17 | 3.24 | 3.28 | 2.73 | 2.61 | 2.46 | 3.22 |
| ICK          | 2.64 | 2.57 | 3.18 | 4.09 | 2.94 | 2.61 | 4.49 | 3.37 |
| DENND2C      | 2.67 | 2.2  | 2.91 | 3.32 | 3.12 | 2.61 | 4.31 | 3.43 |
| DIAPH3       | 2.44 | 2.04 | 3.08 | 3.03 | 3.06 | 2.61 | 4.42 | 3.7  |
| ADM2         | 2.22 | 2.27 | 2.47 | 2.16 | 2.24 | 2.62 | 2.03 | 2.4  |
| HARB1        | 2.49 | 2.88 | 2.57 | 2.17 | 2.72 | 2.62 | 3.54 | 2.52 |
| ARL10        | 2.71 | 2.22 | 2.83 | 2.81 | 2.23 | 2.62 | 2.95 | 2.56 |
| SLFN5        | 2.84 | 2.92 | 3.25 | 3.86 | 2.58 | 2.62 | 3.28 | 2.99 |
| SALL2        | 3.89 | 3.87 | 3.73 | 3.52 | 2.83 | 2.62 | 2.39 | 3.08 |
| TRAK2        | 2.29 | 2.31 | 2.36 | 2.79 | 2.56 | 2.62 | 3.32 | 3.18 |
| CPEB4        | 2.39 | 2.11 | 2.89 | 2.93 | 2.47 | 2.62 | 3.82 | 3.27 |
| NOVA2        | 2.74 | 2.78 | 2.7  | 2.69 | 2.49 | 2.63 | 2.13 | 2.53 |
| ING2         | 2.96 | 3.51 | 3.35 | 2.64 | 2.42 | 2.63 | 3.45 | 2.61 |
| GSTCD        | 2.65 | 1.78 | 2.88 | 2.94 | 2.7  | 2.63 | 3.69 | 3.01 |
| ZNF554       | 2.54 | 3.11 | 3.12 | 2.88 | 3.8  | 2.63 | 3.7  | 3.05 |
| LOC100505549 | 2.16 | 2.71 | 2.54 | 2.41 | 2.88 | 2.63 | 2.95 | 3.16 |
| DCLRE1A      | 2.36 | 2.38 | 2.68 | 3    | 2.35 | 2.63 | 4.41 | 3.17 |
| DAB2         | 2.58 | 2.45 | 2.45 | 2.99 | 2.42 | 2.63 | 3.03 | 3.32 |
| LOC100130451 | 2.1  | 2.04 | 2.13 | 2.92 | 2.99 | 2.63 | 3.53 | 3.61 |
| SPIN4        | 2.06 | 2.12 | 2.25 | 2.58 | 3.04 | 2.63 | 4.02 | 3.62 |
| ANKRD36B     | 1.86 | 1.91 | 1.99 | 2.83 | 2.83 | 2.63 | 4.27 | 3.96 |
| ZMYM6        | 2.38 | 2.39 | 3.15 | 3.24 | 3.26 | 2.63 | 4.63 | 4.5  |
| ZNF287       | 2.05 | 1.93 | 2.06 | 2.16 | 2.3  | 2.64 | 2.87 | 2.46 |
| TCN2         | 3.05 | 3.16 | 2.51 | 2.82 | 3.01 | 2.64 | 2.46 | 2.49 |
| MAP2K6       | 2.39 | 2.48 | 2.46 | 3.16 | 2.25 | 2.64 | 3.44 | 2.75 |
| RAPGEF3      | 2.22 | 2.15 | 1.78 | 2.11 | 2.68 | 2.64 | 2.72 | 2.78 |
| ENOX2        | 2.58 | 2.05 | 2.63 | 2.76 | 3.01 | 2.64 | 3.6  | 3.12 |
| TTC26        | 4.12 | 2.43 | 2.86 | 3.86 | 2.71 | 2.64 | 3.67 | 3.55 |
| C3orf33      | 2.95 | 2.22 | 3.17 | 3.6  | 3.5  | 2.64 | 3.83 | 3.55 |
| EMSY         | 2.48 | 2.47 | 2.9  | 3.22 | 2.83 | 2.64 | 4.24 | 3.85 |
| ZNF326       | 2.6  | 2.85 | 3.13 | 4.07 | 3.3  | 2.64 | 5.01 | 4.21 |
| FBXO8        | 2.72 | 2.71 | 3.41 | 3.85 | 3.27 | 2.64 | 4.1  | 3.33 |
| TIGAR        | 1.74 | 1.67 | 1.75 | 2.13 | 2.93 | 2.65 | 3.65 | 3.5  |
| DLX5         | 3.65 | 4.14 | 4.03 | 3.62 | 2.43 | 2.65 | 4.04 | 3.61 |
| TRMT11       | 2.09 | 2.05 | 2.33 | 2.85 | 2.72 | 2.65 | 4.49 | 3.81 |
| ZNF354C      | 2.32 | 2.27 | 2.75 | 3.9  | 2.4  | 2.65 | 4.78 | 3.94 |
| ZDHHHC21     | 2.29 | 1.97 | 2.53 | 3.11 | 2.78 | 2.65 | 4.86 | 3.94 |
| DCP2         | 2.13 | 2.18 | 2.57 | 3.32 | 2.44 | 2.65 | 4.76 | 4.07 |
| MTX3         | 2.08 | 1.76 | 2.4  | 3.04 | 2.42 | 2.65 | 5.16 | 4.25 |

|              |      |      |      |      |      |      |      |      |
|--------------|------|------|------|------|------|------|------|------|
| PPP1R12B     | 1.72 | 2.03 | 2.29 | 3.28 | 2.76 | 2.66 | 3.35 | 2.77 |
| ZFP28        | 2.57 | 2.15 | 2.59 | 2.88 | 2.44 | 2.66 | 3.97 | 2.79 |
| C1QTNF6      | 2.65 | 2.26 | 2.71 | 2.91 | 2.28 | 2.66 | 3.5  | 2.96 |
| HHIP         | 3.04 | 3.02 | 3.19 | 3.6  | 3.11 | 2.66 | 3.44 | 3.23 |
| ZNF331       | 2.39 | 2.45 | 2.53 | 3.19 | 2.61 | 2.66 | 3.72 | 3.33 |
| PPFIBP2      | 4.16 | 4.03 | 4.61 | 4.38 | 3.73 | 2.66 | 4.04 | 3.55 |
| COL11A1      | 3.25 | 3.31 | 3.7  | 4.03 | 2.69 | 2.66 | 3.64 | 3.76 |
| ASB9         | 1.66 | 1.78 | 1.41 | 1.41 | 2.42 | 2.67 | 2.23 | 2.62 |
| DMRT2        | 3.24 | 3.16 | 3.54 | 2.76 | 2.92 | 2.67 | 2.32 | 2.96 |
| ZNF827       | 2.99 | 2.49 | 2.94 | 2.93 | 2.75 | 2.67 | 3.06 | 3.17 |
| VAMP4        | 2.12 | 2    | 2.59 | 2.84 | 2.59 | 2.67 | 4.57 | 3.85 |
| ZUFSP        | 2.31 | 2.45 | 2.88 | 3.31 | 3.37 | 2.67 | 4.59 | 4.14 |
| C5orf42      | 2.52 | 2.26 | 3.1  | 3.89 | 2.73 | 2.67 | 5.15 | 4.56 |
| IL15RA       | 2.66 | 2.55 | 2.47 | 2.32 | 2.22 | 2.68 | 2.88 | 1.86 |
| C17orf96     | 3.32 | 3.28 | 2.85 | 2.54 | 2.34 | 2.68 | 2.19 | 2.55 |
| ING1         | 2.53 | 2.91 | 3.21 | 2.84 | 2.7  | 2.68 | 2.88 | 2.92 |
| MYNN         | 2.82 | 3.24 | 2.64 | 3.02 | 2.65 | 2.68 | 4.21 | 3.65 |
| FZD3         | 2.81 | 2.75 | 2.71 | 3.71 | 2.98 | 2.68 | 4.5  | 4.26 |
| ZNF91        | 2.59 | 2.61 | 2.67 | 3.81 | 2.74 | 2.68 | 4.69 | 5.09 |
| KIF24        | 2.86 | 2.33 | 2.86 | 2.59 | 2.93 | 2.69 | 2.72 | 2.34 |
| ADAMTS13     | 2.22 | 2.06 | 2.68 | 2.14 | 2.39 | 2.69 | 2.75 | 2.44 |
| LZTS1        | 3.36 | 3.69 | 3.25 | 3.25 | 2.67 | 2.69 | 2.53 | 2.63 |
| PEX11A       | 2.87 | 2.87 | 3.08 | 2.94 | 2.86 | 2.69 | 3.05 | 2.84 |
| TCEANC2      | 2.3  | 2.08 | 2.68 | 2.49 | 2.88 | 2.69 | 3.32 | 3.02 |
| PDZD2        | 2.59 | 2.26 | 2.86 | 3.17 | 2.73 | 2.69 | 3.66 | 3.11 |
| RNASEL       | 2.78 | 2.87 | 2.96 | 3.45 | 2.84 | 2.69 | 3.32 | 3.22 |
| PAPD5        | 2.12 | 2.01 | 3.01 | 3.27 | 2.66 | 2.69 | 3.92 | 3.24 |
| LRP5L        | 3.8  | 3.74 | 3.44 | 4.31 | 3.34 | 2.69 | 4.24 | 3.73 |
| ZBED8        | 2.98 | 2.63 | 3.16 | 3.54 | 2.94 | 2.69 | 4.35 | 3.84 |
| ZNF292       | 2.59 | 2.55 | 2.94 | 3.94 | 2.68 | 2.69 | 4.83 | 4.29 |
| ZNF22        | 5.23 | 4.93 | 5.97 | 6.62 | 2.78 | 2.69 | 4.94 | 4.45 |
| CIB2         | 2.81 | 2.96 | 2.88 | 2.96 | 2.16 | 2.7  | 1.8  | 1.62 |
| LIMS4        | 1.95 | 2.18 | 2.21 | 2.37 | 2.24 | 2.7  | 2.27 | 2.29 |
| FOX11        | 2.88 | 2.75 | 2.74 | 2.65 | 2.52 | 2.7  | 2.38 | 2.34 |
| NOTCH3       | 3.43 | 3.95 | 3.52 | 3.45 | 2.65 | 2.7  | 2.26 | 2.86 |
| POLR3B       | 2.35 | 2.16 | 2.44 | 2.83 | 2.79 | 2.7  | 2.99 | 2.95 |
| AKAP7        | 2.11 | 2.34 | 2.42 | 3.55 | 2.38 | 2.7  | 3.51 | 3.17 |
| USP46        | 2.53 | 2.08 | 3    | 3.37 | 2.79 | 2.7  | 3.9  | 3.56 |
| PGAP1        | 2.54 | 2.56 | 2.85 | 3.96 | 2.64 | 2.7  | 5.12 | 4.56 |
| MME          | 2.75 | 2.38 | 3.47 | 3.81 | 2.74 | 2.7  | 4.98 | 4.61 |
| HLA-G        | 4.17 | 3.54 | 3    | 2.9  | 2.33 | 2.71 | 2.06 | 1.64 |
| ARHGAP25     | 2.4  | 2.34 | 2.4  | 2.06 | 2.38 | 2.71 | 2.84 | 2.08 |
| LOC107983998 | 1.81 | 1.26 | 1.5  | 2.25 | 1.8  | 2.71 | 2.16 | 2.19 |
| NOD1         | 2.08 | 2.12 | 2.27 | 2.33 | 2.65 | 2.71 | 3.09 | 2.65 |
| PPM1N        | 3.03 | 2.63 | 2.02 | 2.5  | 2.38 | 2.71 | 2.68 | 2.81 |
| HERC1        | 2.54 | 2.41 | 2.71 | 2.8  | 2.46 | 2.71 | 3.11 | 3.1  |
| PAQR6        | 2.51 | 2.47 | 2.67 | 2.95 | 2.82 | 2.71 | 3.32 | 3.38 |
| MMS22L       | 2.33 | 1.95 | 3.08 | 3.39 | 2.88 | 2.71 | 4.75 | 3.57 |
| NBEA         | 2.08 | 2.1  | 2.47 | 3.36 | 3.21 | 2.71 | 4.7  | 4.47 |
| TGFB3L       | 2.11 | 1.99 | 2.05 | 2.18 | 1.95 | 2.72 | 1.48 | 1.06 |
| FAM118B      | 3.03 | 2.86 | 2.95 | 2.66 | 3.53 | 2.72 | 3.66 | 2.95 |
| AGO3         | 2.53 | 2.26 | 2.58 | 3.22 | 2.74 | 2.72 | 3.07 | 3.17 |
| NTN4         | 3.46 | 3.89 | 3.76 | 3.94 | 3.03 | 2.72 | 3.48 | 3.58 |
| MYO5A        | 1.99 | 1.8  | 2.44 | 3.05 | 2.63 | 2.72 | 4.36 | 3.62 |
| KIF14        | 1.76 | 1.72 | 1.98 | 2.73 | 2.51 | 2.72 | 5.79 | 4.66 |
| NIM1K        | 1.88 | 1.53 | 1.9  | 1.51 | 2.56 | 2.73 | 2.19 | 2.56 |
| SLITRK5      | 3.08 | 2.9  | 3.21 | 2.99 | 2.62 | 2.73 | 2.91 | 3.07 |
| ANKRD42      | 2.1  | 2.35 | 2.61 | 2.62 | 2.83 | 2.73 | 3.84 | 3.13 |
| CRY1         | 2.67 | 2.46 | 2.73 | 2.97 | 2.85 | 2.73 | 3.19 | 3.18 |
| POLR3G       | 1.85 | 2.38 | 2.23 | 2.6  | 2.38 | 2.73 | 3.65 | 3.2  |
| ARNTL2       | 2.55 | 2.25 | 2.83 | 2.87 | 3.32 | 2.73 | 3.85 | 3.32 |
| HOXB5        | 3.54 | 3.71 | 3    | 3.05 | 3.08 | 2.73 | 3    | 3.76 |
| PBX3         | 3.12 | 3.14 | 3.36 | 3.41 | 3.27 | 2.73 | 3.23 | 3.93 |
| SNED1        | 3.35 | 3.47 | 3.43 | 3.83 | 2.3  | 2.74 | 2.23 | 2.63 |
| DUSP18       | 2.66 | 3.03 | 2.6  | 2.99 | 2.59 | 2.74 | 2.77 | 3    |
| SYNGAP1      | 3    | 3.12 | 3.04 | 3.24 | 2.82 | 2.74 | 2.84 | 3.05 |
| CTH          | 3.51 | 3.27 | 3.16 | 3.18 | 3.09 | 2.74 | 4.03 | 3.8  |
| MTBP         | 2.24 | 2.15 | 3.02 | 2.63 | 3.02 | 2.74 | 4.67 | 3.9  |
| IQCG         | 2.16 | 2.28 | 2.33 | 2.45 | 2.41 | 2.75 | 3.43 | 2.74 |
| C2CD2L       | 2.69 | 3.07 | 3.03 | 2.71 | 3.16 | 2.75 | 2.95 | 3.02 |
| SOCS6        | 2.33 | 2.58 | 2.52 | 3.01 | 2.78 | 2.75 | 3.47 | 3.16 |
| HIST1H2BD    | 3.7  | 3.73 | 3.97 | 4    | 2.42 | 2.75 | 3.67 | 3.19 |
| ZKSCAN2      | 2.72 | 2.68 | 2.88 | 3.13 | 2.73 | 2.75 | 3.1  | 3.28 |
| SNTB2        | 2.36 | 2.46 | 2.75 | 3.25 | 2.93 | 2.75 | 3.84 | 3.53 |
| PIGB         | 2.7  | 2.47 | 2.59 | 2.79 | 2.39 | 2.75 | 3.49 | 3.59 |
| TMEM17       | 2.95 | 2.32 | 2.58 | 3.22 | 3.04 | 2.75 | 4.09 | 3.98 |
| CACNB4       | 2.64 | 2.43 | 2.99 | 3.31 | 2.68 | 2.75 | 5.14 | 4.49 |
| GADD45B      | 2.75 | 3.17 | 3.33 | 2.47 | 3.28 | 2.75 | 2.41 | 2.16 |
| LOC730183    | 2.53 | 2.71 | 1.84 | 2.5  | 1.51 | 2.76 | 2.47 | 2.2  |
| TLL11        | 2.02 | 1.89 | 2.13 | 2.22 | 2.72 | 2.76 | 2.27 | 2.7  |
| ZNF16        | 3.46 | 3.17 | 3.36 | 3.52 | 2.79 | 2.76 | 3.1  | 2.85 |
| PCYT1B       | 2.49 | 2.86 | 3    | 2.89 | 2.64 | 2.76 | 2.73 | 2.86 |
| MDM1         | 1.85 | 2.45 | 1.97 | 2.88 | 2.54 | 2.76 | 4.53 | 3.25 |
| CCDC138      | 1.98 | 1.93 | 2.06 | 2.45 | 2.59 | 2.76 | 4.26 | 3.49 |



|              |      |      |      |      |      |      |      |      |
|--------------|------|------|------|------|------|------|------|------|
| KRBOX4       | 2.67 | 2.15 | 2.51 | 3.09 | 2.67 | 2.76 | 3.7  | 3.56 |
| TRAPPC6B     | 3.41 | 2.2  | 2.62 | 3.5  | 3.04 | 2.76 | 3.94 | 4.16 |
| G2E3         | 2.45 | 2.2  | 2.39 | 2.66 | 3    | 2.76 | 5.12 | 4.19 |
| PPM1L        | 2.03 | 2.1  | 2.33 | 2.57 | 2.77 | 2.77 | 3.22 | 2.77 |
| DDX10        | 2.07 | 1.92 | 2.35 | 2.54 | 2.72 | 2.77 | 3.28 | 2.77 |
| LOC105379417 | 2.02 | 2.09 | 2.7  | 2.39 | 2.49 | 2.77 | 2.77 | 2.92 |
| SYTL4        | 2.81 | 2.76 | 3.13 | 2.87 | 2.23 | 2.77 | 2.72 | 3.06 |
| ANKRD34A     | 3.22 | 3.22 | 2.53 | 2.93 | 2.94 | 2.77 | 2.61 | 3.12 |
| TUBGCP5      | 2.25 | 2.28 | 2.86 | 2.7  | 3.2  | 2.77 | 3.54 | 3.15 |
| DNAJC12      | 2.92 | 1.91 | 3.09 | 3.08 | 3.25 | 2.77 | 4.57 | 3.19 |
| RNF169       | 2.55 | 2.55 | 2.98 | 2.95 | 2.84 | 2.77 | 3.73 | 3.4  |
| GNG2         | 2.29 | 2.68 | 3.03 | 3.18 | 2.72 | 2.77 | 3.89 | 3.5  |
| ZNF700       | 2.57 | 2.94 | 3.05 | 3.59 | 2.63 | 2.77 | 4.49 | 3.67 |
| CRIPT        | 2.57 | 2.37 | 2.52 | 3.23 | 2.77 | 2.77 | 3.92 | 3.68 |
| MIER3        | 2.61 | 2.33 | 2.78 | 3.61 | 2.54 | 2.77 | 4.68 | 4.1  |
| CBWD6        | 3.04 | 2.45 | 3.24 | 2.07 | 2.86 | 2.77 | 5.48 | 4.34 |
| LOC100126447 | 3.19 | 2.24 | 2.91 | 4.82 | 3.33 | 2.77 | 4.5  | 4.87 |
| DNAAF3       | 2.35 | 2.61 | 2.43 | 2.29 | 2.25 | 2.78 | 1.74 | 2.76 |
| ZCWPW1       | 2.36 | 2.27 | 2.96 | 2.3  | 3.02 | 2.78 | 3.13 | 2.85 |
| PRUNE2       | 2.3  | 2.68 | 2.75 | 3.13 | 2.75 | 2.78 | 3.56 | 3.27 |
| GTPBP10      | 2.33 | 2.3  | 2.53 | 2.95 | 2.89 | 2.78 | 4.39 | 3.44 |
| STON1        | 2.85 | 2.46 | 3.11 | 3.9  | 2.78 | 2.78 | 3.83 | 3.55 |
| PLEKHG1      | 2.51 | 2.41 | 2.77 | 2.97 | 2.83 | 2.78 | 3.69 | 3.6  |
| UTP14C       | 2.6  | 2.1  | 3.16 | 3.78 | 3.31 | 2.78 | 3.98 | 4.05 |
| HOCK3        | 2.67 | 2.45 | 2.8  | 3.54 | 2.83 | 2.78 | 4.39 | 4.08 |
| MYO1G        | 3.43 | 3.51 | 3.13 | 3.23 | 2.8  | 2.79 | 2.26 | 2.66 |
| XPNPPE3      | 2.11 | 2.14 | 2.18 | 3.04 | 2.76 | 2.79 | 3.15 | 2.92 |
| SERPINF2     | 3.33 | 3.61 | 3.48 | 3.76 | 2.74 | 2.79 | 2.79 | 3.1  |
| SNX30        | 2.53 | 2.33 | 2.84 | 3.17 | 3.41 | 2.79 | 3.21 | 3.47 |
| ZNF438       | 3.63 | 3.66 | 3.78 | 3.93 | 3.36 | 2.79 | 3.95 | 3.83 |
| ZNF761       | 2.5  | 2.22 | 2.31 | 2.41 | 2.8  | 2.79 | 4.8  | 3.99 |
| SCN1B        | 3.93 | 3.59 | 3.94 | 3.92 | 2.97 | 2.8  | 2.82 | 1.94 |
| SYCE2        | 2.99 | 3.16 | 1.97 | 3.32 | 2.73 | 2.8  | 3.04 | 2.15 |
| GSTM2        | 3.21 | 2.76 | 3.57 | 3.1  | 2.23 | 2.8  | 2.94 | 2.43 |
| C17orf51     | 2.54 | 2.58 | 2.13 | 2.35 | 3.08 | 2.8  | 2.34 | 2.53 |
| CDK5R1       | 2.28 | 2.64 | 2.44 | 2.5  | 2.6  | 2.8  | 2.72 | 2.99 |
| ZNF365       | 2.3  | 2.39 | 2.19 | 2.93 | 3.28 | 2.8  | 3.9  | 3.37 |
| FOXN2        | 2.55 | 2.69 | 2.53 | 3.05 | 2.51 | 2.8  | 4.61 | 3.53 |
| PTCH1        | 3.85 | 3.7  | 4.24 | 4.04 | 2.9  | 2.8  | 3.78 | 3.71 |
| ZNF419       | 3.05 | 2.57 | 3.73 | 3.51 | 2.48 | 2.8  | 3.72 | 3.84 |
| FNIP1        | 2.04 | 1.99 | 2.35 | 3.42 | 2.66 | 2.8  | 4.84 | 3.88 |
| GALNT13      | 1.8  | 2.12 | 2.51 | 2.52 | 3.3  | 2.8  | 4.08 | 3.9  |
| DNHD1        | 2.14 | 1.92 | 2.36 | 2.64 | 2.78 | 2.8  | 4.12 | 3.96 |
| RGAG4        | 3.43 | 4    | 3.04 | 3.44 | 2.46 | 2.81 | 2.34 | 2.86 |
| DIAPH2       | 2.26 | 1.72 | 2.34 | 2.56 | 2.86 | 2.81 | 4.2  | 3.33 |
| NHLRC2       | 2.57 | 3.07 | 2.47 | 4.01 | 3.46 | 2.81 | 5.01 | 4.45 |
| EFCAB2       | 2.84 | 2.88 | 2.56 | 3.02 | 2.85 | 2.81 | 3.19 | 4.52 |
| FLRT3        | 3.79 | 3.45 | 4.16 | 4.74 | 3.04 | 2.81 | 4.52 | 4.57 |
| JMJD1C       | 2.43 | 2.15 | 2.9  | 3.75 | 2.79 | 2.81 | 5.43 | 4.66 |
| SLC25A35     | 2.55 | 2.88 | 2.39 | 2.75 | 2.25 | 2.82 | 1.8  | 2.24 |
| TUBB4A       | 3.46 | 4.07 | 3.67 | 3.19 | 2.4  | 2.82 | 1.8  | 2.47 |
| WNT3         | 2.18 | 2.73 | 2.4  | 2.61 | 2.76 | 2.82 | 3.14 | 2.79 |
| AMIGO3       | 3.64 | 3.38 | 3.59 | 2.94 | 2.68 | 2.82 | 2.79 | 3.03 |
| CRIPAK       | 2.33 | 2.2  | 2.65 | 2.99 | 2.57 | 2.82 | 3.72 | 3.06 |
| HACD1        | 3.46 | 3.11 | 3.18 | 2.67 | 3.04 | 2.82 | 2.97 | 3.09 |
| RAD51B       | 2.91 | 2.81 | 2.83 | 2.92 | 3.13 | 2.82 | 3.33 | 3.14 |
| MAGI1        | 2.95 | 2.46 | 3.1  | 3.51 | 3.03 | 2.82 | 3.77 | 3.31 |
| FAR2         | 2.57 | 2.53 | 2.69 | 3.29 | 3.54 | 2.82 | 4.57 | 3.9  |
| DTWD1        | 2.85 | 2.93 | 2.52 | 3.4  | 3.48 | 2.82 | 4.31 | 4.13 |
| CLEC11A      | 2.63 | 2.64 | 2.05 | 2.66 | 2.01 | 2.83 | 1.78 | 1.64 |
| BCL11A       | 2.96 | 3.23 | 3.14 | 3.16 | 2.49 | 2.83 | 2.73 | 2.44 |
| TREM2        | 1.66 | 1.53 | 2.27 | 1.37 | 4.19 | 2.83 | 2.32 | 2.59 |
| WASF3        | 2.43 | 2.47 | 2.38 | 3.19 | 2.73 | 2.83 | 3    | 2.98 |
| MXD1         | 2.47 | 2.13 | 2.8  | 2.87 | 3.11 | 2.83 | 4.34 | 3.51 |
| SYNJ1        | 2.35 | 2.29 | 2.64 | 3.15 | 2.73 | 2.83 | 4.14 | 3.62 |
| ZBTB18       | 2.96 | 2.84 | 3.23 | 3.69 | 3.39 | 2.83 | 4.29 | 3.67 |
| EXOG         | 2.37 | 1.99 | 3.2  | 3.21 | 2.92 | 2.83 | 3.45 | 3.82 |
| ZNF506       | 2.94 | 2.63 | 3.35 | 4.13 | 3.02 | 2.83 | 4.77 | 4.01 |
| C4orf36      | 2.89 | 2.55 | 2.91 | 3.93 | 2.94 | 2.83 | 5.15 | 4.49 |
| HOXA5        | 2.58 | 2.97 | 2.35 | 2.31 | 2.54 | 2.84 | 3.26 | 2.25 |
| DET1         | 2.44 | 2.65 | 2.3  | 2.64 | 2.55 | 2.84 | 2.81 | 2.88 |
| PM20D2       | 2    | 1.94 | 2.86 | 2.44 | 2.48 | 2.84 | 3.12 | 2.96 |
| OPHN1        | 3.05 | 2.68 | 3.11 | 3.35 | 2.65 | 2.84 | 3.6  | 3.28 |
| KCNQ5        | 2.4  | 1.72 | 2.43 | 2.77 | 2.79 | 2.84 | 3.45 | 3.35 |
| ZNF160       | 2.79 | 2.46 | 3.12 | 3.84 | 2.57 | 2.84 | 4    | 3.77 |
| PCGF5        | 2.39 | 2.22 | 2.39 | 3.19 | 2.66 | 2.84 | 5.28 | 4.04 |
| PCF11        | 3.08 | 2.83 | 3.25 | 3.98 | 3.35 | 2.84 | 4.58 | 4.23 |
| FBLN7        | 3.24 | 3.46 | 3.42 | 2.79 | 2.59 | 2.85 | 2.35 | 2.55 |
| MAF          | 3.4  | 3.07 | 3.15 | 3.17 | 3.03 | 2.85 | 2.7  | 2.76 |
| ZNF425       | 3.21 | 3.17 | 3.29 | 3.13 | 2.59 | 2.85 | 2.34 | 2.89 |
| OTUD6B       | 2.53 | 2.25 | 2.59 | 3.03 | 2.76 | 2.85 | 5.3  | 4.43 |
| KIAA1109     | 2.43 | 2.18 | 2.82 | 3.7  | 2.65 | 2.85 | 5.9  | 4.85 |
| CCDC149      | 2.99 | 2.82 | 2.92 | 2.81 | 3.21 | 2.86 | 2.93 | 2.95 |
| CYB5RL       | 3.14 | 2.61 | 3.36 | 3.15 | 3.41 | 2.86 | 3.81 | 3.12 |
| TDRD3        | 2.52 | 2.38 | 2.78 | 3.44 | 3.18 | 2.86 | 4.33 | 3.49 |

|              |      |      |      |      |      |      |      |      |
|--------------|------|------|------|------|------|------|------|------|
| ROM1         | 2.97 | 3.64 | 2.97 | 3.03 | 3.63 | 2.86 | 2.71 | 3.57 |
| AHI1         | 2.3  | 2.25 | 2.74 | 2.85 | 2.52 | 2.86 | 5.38 | 4.15 |
| TEX30        | 2.61 | 3.01 | 3.22 | 3.55 | 2.95 | 2.86 | 4.04 | 4.22 |
| ZNF124       | 2.7  | 2.34 | 2.86 | 3.84 | 3.37 | 2.86 | 5.3  | 4.57 |
| AADAC        | 1.85 | 1.46 | 3.11 | 2.82 | 2.65 | 2.86 | 5.81 | 4.61 |
| SOCS4        | 2.38 | 2.02 | 2.42 | 3.42 | 2.97 | 2.86 | 5.94 | 4.91 |
| SLC2A5       | 2.45 | 2.4  | 1.8  | 2.25 | 2.32 | 2.87 | 1.89 | 2.38 |
| MT1F         | 4.39 | 3.82 | 3.51 | 4.9  | 3.86 | 2.87 | 3.36 | 2.56 |
| NOMO3        | 2.52 | 4.17 | 1.98 | 1.42 | 3.66 | 2.87 | 2.72 | 2.57 |
| DNM3         | 2.86 | 2.55 | 2.5  | 2.75 | 3.11 | 2.87 | 3.2  | 3.26 |
| SETD4        | 3.21 | 3.31 | 2.67 | 3.17 | 3.7  | 2.87 | 4.27 | 3.58 |
| USP37        | 3.11 | 2.76 | 3.26 | 3.69 | 2.85 | 2.87 | 4.04 | 3.77 |
| MSANTD4      | 3.12 | 3.26 | 3.02 | 4.15 | 3.25 | 2.87 | 4.64 | 4.59 |
| KIAA0753     | 2.55 | 2.65 | 2.94 | 3.45 | 3    | 2.88 | 4.49 | 3.51 |
| ITGB8        | 2.87 | 2.84 | 3.2  | 4.18 | 3    | 2.88 | 5.73 | 4.65 |
| HLA-F        | 3.05 | 3.19 | 3.04 | 3.14 | 2.23 | 2.89 | 2.85 | 2.03 |
| ZBTB47       | 2.37 | 2.63 | 2.35 | 2.36 | 2.52 | 2.89 | 2.44 | 2.58 |
| TEKT4        | 2.71 | 2.8  | 2.39 | 2.3  | 2.97 | 2.89 | 2.84 | 2.77 |
| SCNN1D       | 1.91 | 1.63 | 2.21 | 2.56 | 3.01 | 2.89 | 2.94 | 2.83 |
| MAPK8        | 2.3  | 2.69 | 2.94 | 3.1  | 2.83 | 2.89 | 3.9  | 3.49 |
| LCLAT1       | 2.79 | 2.28 | 3.19 | 3.34 | 3.24 | 2.89 | 4.17 | 3.82 |
| TMEM170A     | 2.85 | 2.87 | 3.04 | 3.41 | 3.04 | 2.89 | 3.61 | 4.08 |
| JRKL         | 3.27 | 2.95 | 3.45 | 4.08 | 3.44 | 2.89 | 6.07 | 4.8  |
| F8           | 3.34 | 2.76 | 3.51 | 3.87 | 2.93 | 2.9  | 4.16 | 3.52 |
| ZFH3         | 2.89 | 2.72 | 3.09 | 3.78 | 2.93 | 2.9  | 3.53 | 3.76 |
| SEC61A2      | 2.94 | 3.22 | 2.64 | 3.58 | 3.7  | 2.9  | 4.12 | 3.99 |
| UACA         | 2.91 | 2.87 | 3.35 | 3.81 | 2.91 | 2.9  | 4.89 | 4.11 |
| PRRG1        | 2.89 | 2.7  | 3.05 | 3.93 | 3.42 | 2.9  | 5.19 | 4.26 |
| ID2          | 2.11 | 2.29 | 2.11 | 2.45 | 3.4  | 2.91 | 2.83 | 2.33 |
| ZFAT         | 2.51 | 2.54 | 2.49 | 2.42 | 2.74 | 2.91 | 2.46 | 2.69 |
| LSM11        | 2.36 | 2.09 | 2.8  | 2.66 | 2.89 | 2.91 | 3.07 | 2.78 |
| SLC1A4       | 2.92 | 3.26 | 2.85 | 2.65 | 3.04 | 2.91 | 2.97 | 2.9  |
| ARPC4-TTL3   | 2.43 | 2.35 | 2.8  | 2.82 | 2.3  | 2.91 | 3.28 | 2.96 |
| PYROXD1      | 2.38 | 2.1  | 1.88 | 1.95 | 1.99 | 2.91 | 3.17 | 3.04 |
| UAP1L1       | 2.82 | 2.8  | 3.02 | 2.78 | 2.58 | 2.91 | 3.1  | 3.09 |
| EFHC1        | 2.81 | 2.43 | 2.66 | 3.31 | 2.93 | 2.91 | 4.42 | 3.49 |
| GKAP1        | 2.49 | 2.86 | 3.24 | 3.39 | 2.74 | 2.91 | 3.88 | 3.66 |
| LOC107986800 | 2.81 | 2.54 | 3.01 | 3.27 | 2.78 | 2.91 | 4.4  | 3.7  |
| TBC1D31      | 2.8  | 2.39 | 2.88 | 3.24 | 2.71 | 2.91 | 5.04 | 4.09 |
| ZNF253       | 2.63 | 2.16 | 2.78 | 3.61 | 2.58 | 2.91 | 5.04 | 4.17 |
| MTMR9        | 3.19 | 3.21 | 3.52 | 3.33 | 3.84 | 2.91 | 4.93 | 4.27 |
| NPHP3        | 2.54 | 2.28 | 3.27 | 3.56 | 2.59 | 2.91 | 5.96 | 4.59 |
| RCN3         | 4.64 | 5.4  | 3.85 | 4.5  | 3.13 | 2.92 | 1.96 | 2    |
| PNCK         | 3.38 | 3.05 | 2.7  | 3.35 | 1.49 | 2.92 | 2.17 | 2.12 |
| CCDC157      | 2.86 | 2.32 | 2.99 | 2.49 | 2.17 | 2.92 | 2.62 | 2.44 |
| GALK2        | 2.36 | 2.66 | 2.42 | 2.24 | 3.27 | 2.92 | 2.75 | 2.92 |
| SCG2         | 1.45 | 1.17 | 1.7  | 1.64 | 2.17 | 2.92 | 3.61 | 2.99 |
| PTPDC1       | 2.58 | 2.43 | 2.78 | 2.67 | 2.85 | 2.92 | 4.24 | 3.63 |
| RASAL2       | 2.33 | 2.28 | 2.84 | 3.13 | 2.98 | 2.92 | 4.21 | 3.82 |
| HACE1        | 2.9  | 2.17 | 3.41 | 3.71 | 3.15 | 2.92 | 5.13 | 3.85 |
| ERCC4        | 2.62 | 2.02 | 2.63 | 2.93 | 2.94 | 2.92 | 3.84 | 3.91 |
| FBXO30       | 2.76 | 2.51 | 2.84 | 3.58 | 3.31 | 2.92 | 4.84 | 4.4  |
| ERCC6L2      | 2.21 | 1.99 | 2.88 | 3.68 | 2.82 | 2.92 | 5.16 | 4.56 |
| ROCK2        | 2.59 | 2.24 | 3.24 | 4.05 | 2.72 | 2.92 | 5.21 | 4.68 |
| RUFY2        | 2.81 | 2.2  | 3.15 | 4.14 | 2.74 | 2.92 | 5.7  | 4.74 |
| EDARADD      | 4.47 | 4.34 | 4.09 | 4.13 | 2.81 | 2.93 | 2.73 | 2.85 |
| MBOAT1       | 3.55 | 3.22 | 3.13 | 3.88 | 2.99 | 2.93 | 4.02 | 2.91 |
| TMEM218      | 2.98 | 3.08 | 2.75 | 3.27 | 3.39 | 2.93 | 3.34 | 3.08 |
| NDUFAF4      | 3.02 | 3.14 | 3.65 | 3.31 | 3.81 | 2.93 | 3.9  | 3.72 |
| ZNF18        | 3.63 | 3.42 | 2.86 | 3.8  | 3.35 | 2.93 | 3.79 | 3.94 |
| EFCAB7       | 3.63 | 3.44 | 3.33 | 3.94 | 3.55 | 2.93 | 5.35 | 4.43 |
| LZTS3        | 3.37 | 3.3  | 3.14 | 2.96 | 2.98 | 2.94 | 2.79 | 2.93 |
| ZNF304       | 3.04 | 3.12 | 2.9  | 2.97 | 3.13 | 2.94 | 3.53 | 3.4  |
| TOX          | 3.22 | 2.91 | 3.26 | 3.41 | 3.61 | 2.94 | 3.37 | 3.64 |
| TTBK2        | 2.69 | 2.25 | 2.99 | 3.4  | 2.79 | 2.94 | 4.31 | 3.74 |
| EPM2AIP1     | 2.65 | 2.38 | 3.07 | 3.45 | 2.89 | 2.94 | 5.24 | 4.31 |
| CEBPA        | 3.13 | 3.56 | 3.15 | 2.88 | 2.85 | 2.95 | 2.29 | 2.36 |
| ZNF256       | 3.03 | 2.79 | 2.87 | 3.05 | 3.15 | 2.95 | 3.41 | 2.68 |
| SLC24A3      | 2.61 | 3.05 | 2.85 | 2.63 | 3.26 | 2.95 | 3.44 | 3.03 |
| MDFIC        | 2.46 | 2.76 | 3.81 | 3.55 | 2.85 | 2.95 | 4.12 | 3.11 |
| CCDC153      | 2.44 | 3.22 | 3.03 | 2.75 | 2.84 | 2.95 | 2.77 | 3.47 |
| PPP4R4       | 1.99 | 2.18 | 2.58 | 3.45 | 1.49 | 2.95 | 3.17 | 3.47 |
| CD274        | 2.71 | 3.1  | 2.98 | 3.84 | 3.28 | 2.95 | 4.69 | 3.48 |
| SIMC1        | 2.9  | 2.35 | 3.12 | 3.44 | 2.56 | 2.95 | 3.15 | 3.54 |
| CNTN1        | 1.93 | 1.99 | 2.31 | 2.97 | 2.74 | 2.95 | 4.67 | 3.88 |
| HAUS3        | 2.91 | 2.74 | 2.68 | 3.26 | 3.56 | 2.95 | 5.65 | 4.59 |
| C9orf116     | 2.77 | 2.63 | 2.84 | 3.19 | 3.17 | 2.96 | 2.9  | 2.4  |
| LOC107985108 | 2.78 | 2.66 | 2.42 | 1.67 | 2.09 | 2.96 | 2.47 | 2.42 |
| CDKL4        | 2.83 | 2.94 | 2.99 | 2.99 | 2.54 | 2.96 | 2.29 | 2.43 |
| TESMIN       | 3.04 | 2.56 | 3.08 | 2.49 | 3.04 | 2.96 | 2.62 | 2.62 |
| TSHZ3        | 3.55 | 3.47 | 3.22 | 3.76 | 3.24 | 2.96 | 3.01 | 2.68 |
| ZBTB46       | 4.15 | 3.67 | 3.84 | 4.24 | 3.71 | 2.96 | 2.91 | 2.7  |
| JAK3         | 3.51 | 3.9  | 3.53 | 3.23 | 2.77 | 2.96 | 3.15 | 3.1  |
| TRIM9        | 3    | 2.85 | 2.9  | 2.98 | 2.77 | 2.96 | 3.2  | 3.11 |

|              |      |      |      |      |      |      |      |      |
|--------------|------|------|------|------|------|------|------|------|
| NBPF19       | 3.63 | 3.65 | 3.76 | 4.32 | 4.27 | 2.96 | 4.41 | 3.61 |
| VCP1P1       | 2.62 | 2.65 | 2.96 | 3.51 | 3    | 2.96 | 4.66 | 4.19 |
| TBCK         | 2.54 | 2.04 | 3.03 | 3.59 | 3.33 | 2.96 | 4.24 | 4.28 |
| EGFL8        | 1.76 | 1.72 | 1.94 | 1.8  | 2.28 | 2.97 | 3.2  | 2.2  |
| IQCD         | 1.46 | 2.1  | 2.05 | 2.34 | 2.6  | 2.97 | 2.36 | 2.9  |
| AAK1         | 2.79 | 2.85 | 2.98 | 3.37 | 3    | 2.97 | 3.55 | 3.33 |
| ALG11        | 2.27 | 1.88 | 3.25 | 3.2  | 2.5  | 2.97 | 3.83 | 3.42 |
| DCUN1D2      | 2.93 | 2.75 | 2.59 | 3.15 | 3.16 | 2.97 | 4.13 | 3.45 |
| NEK4         | 2.99 | 2.63 | 3.12 | 4.19 | 3.38 | 2.97 | 4.12 | 3.52 |
| SLC24A1      | 3.39 | 3.07 | 3.49 | 3.95 | 3.54 | 2.97 | 4.02 | 4.05 |
| FAM76B       | 2.33 | 2.48 | 2.72 | 3.19 | 2.78 | 2.97 | 5.32 | 4.11 |
| DMXL1        | 2.38 | 2.07 | 2.85 | 3.34 | 2.79 | 2.97 | 4.93 | 4.14 |
| LOC107984138 | 3.17 | 3.31 | 3.53 | 3.57 | 2.87 | 2.97 | 5.02 | 4.33 |
| RBAK         | 2.62 | 2.57 | 3.3  | 3.56 | 2.64 | 2.97 | 5.54 | 4.87 |
| NEMP2        | 3.11 | 2.47 | 2.76 | 2.5  | 2.72 | 2.98 | 2.96 | 2.26 |
| LOC105371397 | 2.38 | 2.68 | 2.23 | 2.64 | 2.99 | 2.98 | 3.51 | 3.14 |
| HOXD4        | 2.5  | 2.92 | 2.42 | 3.18 | 3.42 | 2.98 | 2.6  | 3.23 |
| TET3         | 3.36 | 2.89 | 3.26 | 3.4  | 3.2  | 2.98 | 3.54 | 3.42 |
| ACSL1        | 3.13 | 3.48 | 3.41 | 3.4  | 3.43 | 2.98 | 3.79 | 3.54 |
| EPB41L4B     | 2.79 | 2.87 | 3.07 | 3.38 | 3.32 | 2.98 | 3.99 | 3.55 |
| BMP2         | 3    | 2.74 | 2.88 | 2.91 | 3.19 | 2.98 | 3.19 | 3.63 |
| SGO2         | 2    | 1.81 | 2.15 | 2.46 | 2.62 | 2.98 | 4.78 | 3.66 |
| B3GLCT       | 2.65 | 2.37 | 2.95 | 2.92 | 3.45 | 2.98 | 3.91 | 3.79 |
| PELI1        | 2.94 | 3.29 | 3.06 | 3.7  | 3.58 | 2.98 | 4.11 | 3.96 |
| SREK1IP1     | 2.38 | 2.52 | 2.88 | 3.33 | 2.78 | 2.98 | 4.44 | 3.99 |
| FAM161A      | 2.48 | 2.63 | 3.03 | 3.86 | 2.42 | 2.98 | 5.55 | 4.01 |
| ACADSB       | 2.13 | 2.19 | 2.81 | 2.86 | 2.72 | 2.98 | 5.05 | 4.37 |
| KIF18A       | 2.85 | 2.44 | 2.67 | 2.93 | 3.52 | 2.98 | 5.78 | 4.4  |
| IL32         | 5.66 | 4.77 | 4.34 | 6.03 | 5.83 | 2.98 | 3.94 | 4.44 |
| ZNF208       | 2.1  | 2.03 | 2.69 | 2.89 | 2.52 | 2.98 | 5.75 | 4.48 |
| SSTR5        | 2.95 | 3.07 | 2.7  | 2.98 | 2.39 | 2.99 | 2.21 | 2.57 |
| METTL18      | 2.92 | 2.75 | 3.11 | 3.41 | 3.37 | 2.99 | 3.95 | 3.03 |
| MMACHC       | 2.83 | 2.71 | 2.34 | 2.78 | 2.8  | 2.99 | 2.11 | 3.05 |
| TRIM39       | 3.32 | 3.04 | 2.83 | 2.82 | 2.92 | 2.99 | 3.06 | 3.2  |
| MEIS1        | 3.76 | 3.48 | 3.99 | 4.4  | 3.48 | 2.99 | 4.48 | 4.35 |
| MDM4         | 2.94 | 2.85 | 3.26 | 4.22 | 3.41 | 2.99 | 4.43 | 4.36 |
| BCAT1        | 2.61 | 2.5  | 3.23 | 3.71 | 3.23 | 2.99 | 5.4  | 4.41 |
| IRAK1BP1     | 2.26 | 2.3  | 2.76 | 2.7  | 1.85 | 3    | 2.68 | 2.6  |
| SEMA3G       | 2.42 | 2.19 | 2.43 | 2.23 | 3.3  | 3    | 2.66 | 2.92 |
| C1S          | 3.47 | 3.48 | 3.82 | 3.7  | 3.51 | 3    | 3.98 | 3.23 |
| ICA1         | 3.13 | 3.14 | 3.1  | 3.2  | 3.16 | 3    | 3.81 | 3.59 |
| SLC7A2       | 2.24 | 2.26 | 2.86 | 2.9  | 3.5  | 3    | 4.3  | 4.1  |
| BAGE5        | 2.76 | 3.38 | 3.12 | 3.07 | 3.42 | 3    | 4.32 | 4.18 |
| ZNF148       | 2.44 | 2.6  | 2.83 | 3.39 | 2.89 | 3    | 4.72 | 4.37 |
| ZBTB41       | 2.67 | 2.7  | 2.65 | 3.03 | 3.14 | 3    | 4.12 | 4.73 |
| LOC101928120 | 2.45 | 2.68 | 3.07 | 1.75 | 1.93 | 3.01 | 1.47 | 1.29 |
| CPVL         | 2.42 | 1.92 | 2.35 | 2.41 | 2.51 | 3.01 | 2.64 | 1.89 |
| FAM131C      | 2.83 | 3.86 | 2.7  | 2.7  | 3.32 | 3.01 | 2.34 | 2.3  |
| MRAP2        | 2.71 | 3.01 | 2.97 | 2.93 | 2.76 | 3.01 | 3.17 | 2.5  |
| CAPN5        | 3.07 | 3.54 | 3.07 | 2.81 | 2.82 | 3.01 | 2.15 | 2.66 |
| WDR76        | 3.48 | 3.17 | 3.27 | 3.22 | 3.06 | 3.01 | 3.49 | 2.91 |
| VSIG10       | 3.11 | 3.26 | 3.56 | 3.53 | 3    | 3.01 | 3.73 | 3.06 |
| RAD54L2      | 3.35 | 3.34 | 3.43 | 3.59 | 3.07 | 3.01 | 3.28 | 3.21 |
| ZNF416       | 3.21 | 3.83 | 3.85 | 3.32 | 3.25 | 3.01 | 3.5  | 3.36 |
| ATXN7        | 2.94 | 2.47 | 3.31 | 3.68 | 3.24 | 3.01 | 4.83 | 3.97 |
| ZFYVE16      | 2.56 | 2.27 | 2.58 | 3.4  | 2.85 | 3.01 | 5.36 | 4.54 |
| ZNF324B      | 3.16 | 3.41 | 3.11 | 3.43 | 3.02 | 3.02 | 2.49 | 2.85 |
| ARID3B       | 3.8  | 3.79 | 4.01 | 4.17 | 3.39 | 3.02 | 3.14 | 3.46 |
| CPNE7        | 2.8  | 2.27 | 2.42 | 2.16 | 2.96 | 3.02 | 3.15 | 3.49 |
| TAPT1        | 3.15 | 2.53 | 3.12 | 3.15 | 3.1  | 3.02 | 4.15 | 3.87 |
| LOC105370045 | 3.39 | 2.7  | 2.91 | 3.11 | 2.95 | 3.03 | 1.16 | 1.6  |
| AGAP2        | 3.35 | 3.15 | 2.7  | 2.53 | 2.71 | 3.03 | 2.27 | 2.91 |
| SUSD5        | 4.14 | 3.87 | 4.38 | 4.54 | 2.53 | 3.03 | 2.93 | 3.04 |
| FRS3         | 3.84 | 3.79 | 3.77 | 4.65 | 3.36 | 3.03 | 2.87 | 3.28 |
| STC2         | 5.01 | 4.4  | 4.71 | 4.35 | 3.44 | 3.03 | 3.37 | 3.31 |
| LARP1B       | 2.41 | 2.62 | 2.9  | 2.73 | 3.26 | 3.03 | 4.2  | 3.7  |
| FAM69A       | 3.02 | 2.29 | 2.74 | 2.8  | 2.99 | 3.03 | 3.94 | 3.89 |
| LOC107984026 | 1.91 | 1.6  | 1.6  | 3.03 | 2.42 | 3.04 | 3.17 | 2.43 |
| OTX1         | 2.95 | 3.6  | 2.82 | 3.02 | 2.76 | 3.04 | 2.59 | 2.74 |
| PRELID3A     | 2.41 | 1.81 | 2.1  | 2.46 | 3.05 | 3.04 | 3.14 | 3.05 |
| POU2F1       | 2.65 | 2.78 | 2.89 | 4.21 | 3.37 | 3.04 | 4.38 | 3.34 |
| METTL11B     | 3.62 | 3.36 | 3.15 | 2.5  | 1.98 | 3.04 | 2.68 | 3.42 |
| SMIM13       | 2.98 | 2.92 | 3.25 | 3.6  | 3.07 | 3.04 | 4.28 | 3.99 |
| OR7E24       | 3.04 | 3.51 | 2.96 | 3.76 | 4.21 | 3.04 | 3.63 | 4.23 |
| HOMER1       | 3.64 | 2.89 | 3.13 | 3.52 | 3.27 | 3.04 | 4.53 | 4.28 |
| TTC21B       | 2.89 | 2.5  | 3.15 | 4.09 | 3.13 | 3.04 | 5.5  | 4.64 |
| PCDHA4       | 3.14 | 2.68 | 3.23 | 2.96 | 3.12 | 3.05 | 3.23 | 2.76 |
| SOWAHC       | 3.25 | 2.53 | 2.9  | 3.13 | 2.46 | 3.05 | 3.11 | 3.31 |
| RIC8B        | 2.99 | 3.06 | 2.92 | 3.53 | 3.16 | 3.05 | 3.9  | 3.64 |
| HSPBAP1      | 2.99 | 2.4  | 2.66 | 2.74 | 2.82 | 3.05 | 4.27 | 3.85 |
| FBXO4        | 4.43 | 5.17 | 4.56 | 5.91 | 3.95 | 3.05 | 5.32 | 3.99 |
| EAF2         | 2.8  | 2.61 | 3.3  | 3.34 | 2.7  | 3.05 | 3.69 | 4.03 |
| AGO4         | 3.38 | 3.18 | 3.85 | 3.76 | 3.21 | 3.05 | 4.65 | 4.33 |

|              |      |      |      |      |      |      |      |      |
|--------------|------|------|------|------|------|------|------|------|
| PRCD         | 2.3  | 2.42 | 2.74 | 2.32 | 3.39 | 3.06 | 3.69 | 3.45 |
| BIRC2        | 2.54 | 2.63 | 3.34 | 3.4  | 2.89 | 3.06 | 4.58 | 3.73 |
| HEG1         | 3.63 | 3.77 | 3.84 | 3.99 | 3.62 | 3.06 | 3.83 | 3.84 |
| POLK         | 2.64 | 2.56 | 3.08 | 3.86 | 2.56 | 3.06 | 6.38 | 4.98 |
| EPHX4        | 3.08 | 2.91 | 2.87 | 2.87 | 2.89 | 3.07 | 2.82 | 2.55 |
| ZNF200       | 3.19 | 3.03 | 3.13 | 3.09 | 3.16 | 3.07 | 4.06 | 3.09 |
| USP54        | 2.8  | 2.97 | 3.35 | 3.39 | 2.85 | 3.07 | 3.34 | 3.12 |
| ZNF8         | 2.72 | 2.74 | 2.97 | 2.69 | 3.24 | 3.07 | 2.8  | 3.28 |
| PCDHGA10     | 3.59 | 4.19 | 3.46 | 3.85 | 3.49 | 3.07 | 3.19 | 3.46 |
| TBC1D3E      | 2.57 | 1.81 | 2.33 | 2.36 | 2.51 | 3.07 | 4.76 | 3.49 |
| TAOK3        | 2.83 | 2.57 | 3.25 | 3.6  | 3.25 | 3.07 | 4.02 | 3.6  |
| SLC16A9      | 3.62 | 3.28 | 3.89 | 4.36 | 3.26 | 3.07 | 3.81 | 3.7  |
| SPTSSB       | 2.52 | 2.73 | 3    | 3.97 | 4.47 | 3.07 | 6.06 | 3.92 |
| CEP192       | 2.68 | 2.31 | 2.98 | 3.49 | 3.28 | 3.07 | 4.61 | 4.08 |
| RBM41        | 2.26 | 2.23 | 2.85 | 3.16 | 2.88 | 3.07 | 4.56 | 4.1  |
| RAPGEF6      | 2.23 | 2.47 | 3.07 | 3.63 | 2.74 | 3.07 | 5.4  | 4.72 |
| NSUN6        | 3.29 | 2.93 | 4.02 | 4.07 | 3.07 | 3.07 | 5.82 | 5.02 |
| NAPB         | 2.99 | 2.74 | 3.25 | 3.84 | 3.49 | 3.07 | 5.73 | 5.05 |
| ZNF121       | 2.99 | 2.71 | 2.5  | 3.46 | 3.16 | 3.07 | 6.33 | 5.44 |
| ARHGEF19     | 3.39 | 3.73 | 3.76 | 3.16 | 3.14 | 3.08 | 2.44 | 2.78 |
| PLCD1        | 4.14 | 4.44 | 4.05 | 3.7  | 3.12 | 3.08 | 2.95 | 2.83 |
| TMEM91       | 2.9  | 2.44 | 3.03 | 1.89 | 2.64 | 3.08 | 3.07 | 3.04 |
| TTC28        | 2.96 | 3.05 | 3.08 | 3.34 | 2.89 | 3.08 | 3.21 | 3.25 |
| LOC107985805 | 3.06 | 3.3  | 4.83 | 3.61 | 3.47 | 3.08 | 3.69 | 3.34 |
| KIAA1841     | 2.34 | 2    | 2.6  | 2.92 | 2.54 | 3.08 | 4.03 | 3.37 |
| TRIM13       | 2.94 | 2.66 | 3.19 | 3.8  | 3.06 | 3.08 | 3.83 | 3.7  |
| NBPF10       | 2.1  | 2.26 | 2.98 | 3.36 | 2.81 | 3.08 | 3.55 | 4    |
| FOXS1        | 2.41 | 2.45 | 2.38 | 1.83 | 2.67 | 3.09 | 2.75 | 2.42 |
| LRRC56       | 2.83 | 2.42 | 2.43 | 2.45 | 2.32 | 3.09 | 2.71 | 2.49 |
| MOCOS        | 2.38 | 2.56 | 2.47 | 2.5  | 2.71 | 3.09 | 2.49 | 2.59 |
| CD83         | 3.49 | 3.03 | 3.26 | 3.64 | 2.87 | 3.09 | 3.19 | 2.72 |
| GCNT2        | 2.87 | 2.58 | 2.76 | 2.69 | 2.71 | 3.09 | 3.36 | 3.38 |
| GTF2H2C_2    | 2.06 | 3.4  | 3.39 | 3.09 | 3.64 | 3.09 | 3.51 | 3.38 |
| C8orf37      | 2.4  | 2.51 | 2.4  | 2.42 | 2.54 | 3.09 | 4.03 | 3.93 |
| ZNF480       | 2.79 | 2.38 | 3.08 | 3.82 | 2.79 | 3.09 | 5.13 | 4.75 |
| HYKK         | 3.22 | 2.3  | 2.39 | 3.01 | 2.42 | 3.1  | 3.21 | 2.34 |
| RIN3         | 2.9  | 2.88 | 3.11 | 2.99 | 2.61 | 3.1  | 2.35 | 2.38 |
| SLC2A12      | 2.85 | 2.9  | 2.95 | 3.54 | 3.12 | 3.1  | 3.68 | 3.85 |
| TBRG1        | 2.73 | 2.47 | 2.59 | 3.03 | 2.78 | 3.1  | 3.9  | 3.95 |
| UGGT2        | 2.71 | 2.74 | 2.77 | 3.25 | 3.06 | 3.1  | 5.13 | 4.56 |
| CCDC151      | 2.99 | 3.31 | 3.08 | 2.87 | 2.72 | 3.11 | 2.97 | 2.78 |
| CATSPER1     | 2.02 | 2.19 | 2.3  | 2.21 | 3.3  | 3.11 | 2.42 | 2.9  |
| EPC1         | 3.37 | 2.7  | 3.41 | 3.37 | 2.99 | 3.11 | 4.29 | 3.56 |
| GRPEL2       | 2.53 | 2.03 | 2.68 | 3.61 | 3.28 | 3.11 | 4.15 | 4.16 |
| HYI          | 2.86 | 3.12 | 2.54 | 3.49 | 2.4  | 3.12 | 1.99 | 1.54 |
| C1orf106     | 4.37 | 4.06 | 4.25 | 3.97 | 3.18 | 3.13 | 2.82 | 2.69 |
| CDC25A       | 3.48 | 3.48 | 3.15 | 3.43 | 3.26 | 3.13 | 3.1  | 2.7  |
| KIAA0513     | 2.78 | 3.12 | 2.81 | 2.65 | 3.23 | 3.13 | 2.5  | 2.97 |
| EXD3         | 3.51 | 3.86 | 3.52 | 2.65 | 3.34 | 3.13 | 2.79 | 3.45 |
| TSC1         | 2.96 | 2.86 | 3.13 | 3.44 | 3.22 | 3.13 | 4.17 | 3.58 |
| ZNF551       | 3.04 | 2.73 | 3.18 | 3.61 | 3.29 | 3.13 | 4.12 | 3.76 |
| PKD2         | 3    | 2.76 | 3.19 | 3.55 | 2.55 | 3.13 | 4.59 | 3.89 |
| NLK          | 2.59 | 2.33 | 3.19 | 3.16 | 2.96 | 3.13 | 4.07 | 3.91 |
| CDK19        | 3.24 | 3.43 | 3.58 | 3.87 | 3.39 | 3.13 | 4.78 | 4.48 |
| ZC3H8        | 2.17 | 2.09 | 2.25 | 3.24 | 3.62 | 3.13 | 4.83 | 4.76 |
| IFT81        | 3.34 | 3.19 | 3.67 | 3.78 | 3.33 | 3.13 | 5.53 | 4.9  |
| ZNF69        | 2.75 | 2.33 | 2.98 | 4.18 | 2.62 | 3.13 | 5.19 | 5.02 |
| WSCD1        | 3.26 | 3.45 | 3.49 | 3.1  | 2.91 | 3.14 | 2.35 | 2.38 |
| ITFG2        | 2.29 | 2.8  | 2.62 | 2.42 | 2.97 | 3.14 | 3.13 | 2.8  |
| C16orf87     | 3.15 | 3.57 | 3.08 | 3.79 | 3.7  | 3.14 | 4.47 | 3.46 |
| TMCC2        | 4.35 | 4.21 | 4.26 | 3.84 | 3.58 | 3.14 | 2.65 | 3.69 |
| ZNF354A      | 2.74 | 2.34 | 3.38 | 3.26 | 3.13 | 3.14 | 5.75 | 4.57 |
| GTF2A1       | 2.91 | 2.83 | 3.08 | 4.13 | 3.38 | 3.14 | 5.72 | 4.84 |
| MBTD1        | 3.03 | 2.88 | 3.47 | 4.15 | 3.9  | 3.14 | 6.81 | 5.28 |
| TRPM7        | 2.18 | 2.17 | 2.92 | 3.85 | 3.2  | 3.14 | 6.54 | 5.85 |
| SLC37A1      | 2.24 | 2.49 | 2.15 | 2.58 | 2.87 | 3.15 | 2.27 | 2.53 |
| LATS2        | 2.69 | 2.73 | 3.04 | 2.87 | 2.83 | 3.15 | 3.02 | 2.87 |
| ACOT2        | 3.87 | 3.96 | 4.11 | 4.34 | 3.74 | 3.15 | 3.22 | 3.03 |
| TNFRSF11B    | 2.45 | 2.37 | 2.7  | 2.84 | 2.64 | 3.15 | 3.17 | 3.25 |
| FAM126A      | 2.78 | 2.81 | 3.22 | 3.72 | 3.13 | 3.15 | 5.43 | 4.72 |
| KIAA1586     | 2.56 | 2.07 | 2.74 | 2.34 | 2.22 | 3.15 | 4.75 | 4.79 |
| KLF4         | 2.75 | 2.43 | 2.53 | 2.59 | 3.4  | 3.16 | 3.37 | 3.07 |
| CD1D         | 4.31 | 4.4  | 3.6  | 4.38 | 3.22 | 3.16 | 3.67 | 3.12 |
| TMEM265      | 2.63 | 2.98 | 3.26 | 3.4  | 3.01 | 3.16 | 3.26 | 3.52 |
| ZNF286A      | 2.72 | 2.37 | 3.13 | 3.67 | 3.24 | 3.16 | 5.21 | 4.67 |
| C1GALT1      | 3.24 | 3.18 | 3.62 | 4.83 | 3.03 | 3.16 | 5.58 | 4.88 |
| CACNA1H      | 3.26 | 3.38 | 3.39 | 3.28 | 3.26 | 3.17 | 2.46 | 2.72 |
| CNIH3        | 2.91 | 3.65 | 3.44 | 3.32 | 3.42 | 3.17 | 2.94 | 2.91 |
| TSPAN7       | 2.89 | 3.11 | 2.62 | 3.01 | 3.13 | 3.17 | 2.97 | 3.24 |
| FBXW7        | 2.6  | 2.31 | 2.84 | 3.61 | 3.21 | 3.17 | 4.96 | 4.34 |
| CAMKMT       | 3.34 | 2.89 | 2.48 | 3.8  | 3.39 | 3.17 | 3.82 | 4.4  |
| GEN1         | 2.47 | 2.4  | 2.94 | 3.29 | 3.1  | 3.17 | 5.91 | 4.64 |
| PLA2G4B      | 3.23 | 3.61 | 4.12 | 2.53 | 4.13 | 3.18 | 3.18 | 2.3  |

|              |      |      |      |      |      |      |      |      |
|--------------|------|------|------|------|------|------|------|------|
| TMEFF1       | 1.79 | 2.01 | 1.61 | 1.78 | 1.73 | 3.18 | 2.49 | 2.69 |
| KRT4         | 1.64 | 1.46 | 1.8  | 1.4  | 3.55 | 3.18 | 2.29 | 2.75 |
| RNF157       | 4.29 | 3.82 | 3.74 | 3.91 | 3.32 | 3.18 | 3.03 | 3.17 |
| ZNF333       | 2.67 | 2.99 | 2.97 | 2.9  | 3.07 | 3.18 | 3.72 | 3.31 |
| EPC2         | 3.01 | 2.9  | 3.11 | 3.75 | 2.89 | 3.18 | 4.42 | 3.77 |
| GCNT1        | 2.77 | 3.04 | 3.28 | 3.61 | 3.22 | 3.18 | 4.02 | 3.91 |
| INTS6        | 3.13 | 2.87 | 3.76 | 3.91 | 3.24 | 3.18 | 4.23 | 4.04 |
| SOCS5        | 3.21 | 3.27 | 3.52 | 3.87 | 3.33 | 3.18 | 5.63 | 4.18 |
| HELZ         | 3.12 | 3.15 | 3.67 | 4.54 | 3.4  | 3.18 | 4.83 | 4.74 |
| PROB1        | 2.77 | 2.74 | 2.62 | 2.65 | 3.03 | 3.19 | 2.69 | 3.02 |
| GYLTL1B      | 3.86 | 3.64 | 3.37 | 4.13 | 3.83 | 3.19 | 2.64 | 3.29 |
| ZNF595       | 2.8  | 3.09 | 3.12 | 3.94 | 3    | 3.19 | 4.02 | 3.52 |
| METTL21B     | 3.56 | 3.1  | 3.34 | 3.81 | 3.3  | 3.19 | 3.82 | 3.7  |
| ZBTB2        | 3.15 | 3.4  | 3.16 | 3.68 | 3.21 | 3.19 | 4.1  | 3.91 |
| FAM234B      | 3.74 | 3.65 | 3.96 | 4.29 | 3.74 | 3.19 | 4    | 4.27 |
| SPATA7       | 2.38 | 3.6  | 3.66 | 4.07 | 3.78 | 3.19 | 4.94 | 4.68 |
| DPP8         | 2.9  | 3.01 | 3.27 | 4.87 | 3.62 | 3.19 | 5.9  | 4.8  |
| USPL1        | 2.72 | 2.39 | 3.38 | 3.57 | 3.08 | 3.19 | 5.39 | 4.81 |
| NRIP1        | 2.71 | 2.56 | 3.65 | 4.14 | 3.08 | 3.19 | 5.82 | 5.06 |
| LRRC27       | 3.13 | 3.09 | 2.75 | 2.86 | 2.92 | 3.2  | 2.97 | 3.16 |
| WDSUB1       | 3.96 | 2.93 | 3.22 | 3.47 | 3.18 | 3.2  | 4.64 | 3.21 |
| ANKRD33B     | 2.47 | 2.33 | 2.76 | 2.59 | 3.54 | 3.2  | 3.7  | 3.59 |
| CCDC78       | 1.39 | 1.55 | 2.38 | 1.71 | 2.95 | 3.2  | 3.27 | 3.74 |
| FBXL20       | 2.87 | 2.7  | 2.86 | 3.23 | 3.42 | 3.2  | 3.79 | 3.81 |
| HUS1         | 2.32 | 2.18 | 3.12 | 3.12 | 3.55 | 3.2  | 4.1  | 3.83 |
| PURA         | 3.47 | 2.88 | 3.71 | 3.75 | 3.99 | 3.2  | 4.74 | 4.06 |
| MON2         | 2.97 | 2.76 | 3.43 | 3.62 | 3.37 | 3.2  | 5.38 | 4.14 |
| FAM35A       | 3.03 | 3.17 | 2.84 | 3.38 | 3.44 | 3.2  | 5.8  | 4.7  |
| ITGA1        | 2.89 | 2.55 | 3.69 | 3.61 | 4.07 | 3.2  | 6.31 | 4.86 |
| PARP15       | 2.68 | 2.95 | 3.4  | 4.99 | 3.13 | 3.2  | 8.75 | 5.52 |
| CHAC2        | 2.2  | 3.19 | 2.66 | 2.95 | 2.66 | 3.21 | 3.73 | 2.87 |
| PER1         | 3.13 | 3.35 | 2.75 | 3.11 | 3.66 | 3.21 | 2.79 | 3.18 |
| TNRC6B       | 2.77 | 2.64 | 2.95 | 3.35 | 3.16 | 3.21 | 3.57 | 3.36 |
| TNFAIP3      | 3.73 | 3.52 | 3.49 | 3.64 | 3.51 | 3.21 | 4.13 | 3.58 |
| NUFIP1       | 3.05 | 3.03 | 3.56 | 3.38 | 3.05 | 3.21 | 3.66 | 3.69 |
| C3orf62      | 3.36 | 2.89 | 3.52 | 3.65 | 3.6  | 3.21 | 4.02 | 3.88 |
| LGALS1       | 3.03 | 3.38 | 3.11 | 3.36 | 3.42 | 3.21 | 3.99 | 3.92 |
| KIAA1524     | 2.98 | 2.73 | 3.61 | 3.59 | 3.87 | 3.21 | 5.46 | 4.36 |
| FAM175A      | 2.21 | 2.29 | 2.52 | 3.34 | 3.09 | 3.21 | 5.51 | 4.42 |
| WDR72        | 3.36 | 3.11 | 3.58 | 4.09 | 3.29 | 3.21 | 5.53 | 4.6  |
| ANKRD18A     | 2.28 | 2.04 | 2.46 | 2.73 | 2.85 | 3.21 | 5.51 | 4.8  |
| LOC101929950 | 3.56 | 2.58 | 4.31 | 4.59 | 3.26 | 3.21 | 5.23 | 5.02 |
| KHDRBS3      | 2.92 | 2.44 | 2.75 | 2.29 | 3.73 | 3.22 | 2.81 | 2.4  |
| LETM2        | 2.26 | 2.02 | 2.49 | 2.74 | 2.83 | 3.22 | 3.61 | 2.75 |
| PCDH89       | 3.96 | 3.92 | 3.93 | 4.26 | 3.41 | 3.22 | 3.4  | 3.37 |
| C2CD3        | 3.24 | 2.92 | 3.17 | 3.48 | 2.84 | 3.22 | 4.1  | 3.48 |
| NSUN3        | 2.66 | 2.05 | 2.66 | 3.65 | 2.34 | 3.22 | 4.26 | 3.72 |
| HECA         | 2.86 | 2.37 | 3.11 | 4.07 | 3.23 | 3.22 | 5.04 | 4.27 |
| RAB31P       | 3.13 | 3.98 | 4.01 | 4.02 | 2.9  | 3.22 | 5.76 | 5.3  |
| PIGBOS1      | 2.16 | 2.83 | 2.44 | 2.82 | 3.01 | 3.23 | 3.7  | 2.84 |
| LOC101929796 | 2.1  | 2.77 | 3.23 | 2.99 | 3.41 | 3.23 | 2.4  | 2.87 |
| BICD1        | 3.02 | 2.78 | 3.18 | 3.08 | 3.48 | 3.23 | 3.17 | 3.31 |
| TMEM47       | 3.39 | 3.29 | 4.03 | 4.43 | 2.97 | 3.23 | 5.4  | 3.94 |
| METTL8       | 2.3  | 2.17 | 2.59 | 3.04 | 3.98 | 3.23 | 4.68 | 3.97 |
| STRN         | 2.51 | 2.16 | 3.12 | 3.32 | 3.35 | 3.23 | 5.4  | 4.31 |
| NIPA1        | 3.43 | 3.12 | 3.88 | 4.34 | 3.8  | 3.23 | 5.29 | 4.51 |
| COX7B2       | 2.37 | 2.95 | 2.4  | 2.04 | 3.91 | 3.24 | 3.61 | 2.02 |
| FOXC2        | 2.97 | 2.95 | 3.2  | 2.46 | 2.4  | 3.24 | 2.17 | 2.51 |
| MPP3         | 1.79 | 2.05 | 1.98 | 2.21 | 2.87 | 3.24 | 3.97 | 2.7  |
| AP4S1        | 3.01 | 2.76 | 2.95 | 3.34 | 2.68 | 3.24 | 3.55 | 3.41 |
| STAG3        | 2.41 | 3.05 | 3.28 | 3.2  | 3.46 | 3.24 | 3.33 | 3.54 |
| NFYB         | 2.99 | 2.59 | 3.29 | 3.26 | 2.91 | 3.24 | 4.45 | 3.67 |
| CYP20A1      | 3.27 | 3.34 | 3.33 | 4.21 | 3.31 | 3.24 | 4.2  | 3.77 |
| PRIMPOL      | 3.22 | 2.91 | 3    | 3.7  | 2.74 | 3.24 | 3.71 | 3.97 |
| GPAM         | 2.75 | 2.46 | 3.01 | 3.43 | 3.45 | 3.24 | 4.58 | 4    |
| MIS12        | 3.3  | 3.24 | 3.57 | 4.09 | 3.89 | 3.24 | 5.43 | 4.94 |
| ONECUT3      | 3.55 | 2.89 | 2.99 | 2.99 | 1.96 | 3.25 | 2.05 | 2.44 |
| RINL         | 2.6  | 2.75 | 2.56 | 2.52 | 3.61 | 3.25 | 3.18 | 3.14 |
| TNFRSF10C    | 3.48 | 2.74 | 3.07 | 3.1  | 3.15 | 3.25 | 3.75 | 3.22 |
| ITGA10       | 5.92 | 5.91 | 5.86 | 6.26 | 2.96 | 3.25 | 3.18 | 3.56 |
| TMEM216      | 4.62 | 4.16 | 3.76 | 4.28 | 3.09 | 3.25 | 4.06 | 3.68 |
| PUS3         | 3.12 | 3.93 | 3.32 | 3.79 | 3.93 | 3.25 | 4.98 | 3.96 |
| AP1AR        | 2.68 | 2.95 | 3.26 | 3.6  | 3.61 | 3.25 | 6.09 | 4    |
| LOC107984351 | 5.06 | 4.5  | 3.72 | 3.61 | 3.19 | 3.25 | 4.43 | 6.47 |
| GLYCTK       | 2.98 | 2.45 | 2.17 | 2.52 | 3.72 | 3.26 | 2.89 | 3.09 |
| CAMKK1       | 2.79 | 3.04 | 2.87 | 2.9  | 3.52 | 3.26 | 2.41 | 3.17 |
| FPGT         | 2.87 | 2.71 | 2.88 | 3.71 | 3.3  | 3.26 | 5.21 | 3.68 |
| SLC25A30     | 3.27 | 2.66 | 3.52 | 3.88 | 2.75 | 3.27 | 3.58 | 3.29 |
| GPATCH1      | 3.35 | 3.28 | 3.57 | 3.06 | 3.43 | 3.27 | 3.79 | 3.96 |
| ZNF417       | 3.26 | 2.93 | 3.23 | 3.49 | 3.01 | 3.27 | 4.76 | 3.98 |
| C6orf141     | 2.78 | 2.53 | 2.96 | 2.92 | 3.04 | 3.27 | 4.79 | 4.01 |
| BIVM         | 2.66 | 2.4  | 3.03 | 3.4  | 3.33 | 3.27 | 5.25 | 4.04 |

|              |      |      |      |      |      |      |      |      |
|--------------|------|------|------|------|------|------|------|------|
| CYP4V2       | 3.53 | 3.37 | 3.86 | 4.99 | 3.63 | 3.27 | 5.11 | 4.16 |
| SAMD8        | 2.59 | 2.4  | 3.3  | 3.39 | 3.33 | 3.27 | 5.51 | 4.8  |
| MYSM1        | 2.37 | 2.1  | 2.63 | 3.71 | 2.88 | 3.27 | 7.42 | 5.38 |
| ZNF770       | 3.52 | 3.57 | 4.47 | 5.72 | 3.92 | 3.27 | 7.02 | 6.15 |
| USP18        | 7.23 | 8.48 | 7.09 | 7.11 | 4.11 | 3.28 | 3.51 | 3.33 |
| CCDC69       | 3.14 | 3.23 | 3.22 | 3.74 | 2.83 | 3.28 | 3.3  | 3.56 |
| USP3         | 3.36 | 3.23 | 3.44 | 3.66 | 3.52 | 3.28 | 3.91 | 3.66 |
| SGO1         | 2.94 | 2.39 | 3.21 | 3.37 | 3.39 | 3.28 | 5.42 | 3.9  |
| UPRT         | 3.24 | 3.35 | 3.57 | 3.3  | 3.09 | 3.28 | 4.52 | 3.93 |
| PPP1R15B     | 3.26 | 3.09 | 3.99 | 4.3  | 3.81 | 3.28 | 4.61 | 4.25 |
| ZNF600       | 3.04 | 2.84 | 2.96 | 4.58 | 3.06 | 3.28 | 5.35 | 4.58 |
| TTC8         | 3.49 | 3.46 | 3.86 | 3.99 | 4.41 | 3.28 | 5.6  | 5.23 |
| BDP1         | 2.86 | 2.88 | 3.05 | 3.75 | 3.5  | 3.28 | 6.86 | 5.43 |
| KCNC4        | 2.35 | 2.14 | 2.26 | 2.17 | 2.72 | 3.29 | 2.67 | 2.68 |
| EFCAB11      | 3.49 | 2.52 | 3.45 | 3.22 | 3.15 | 3.29 | 3.96 | 2.9  |
| SLC25A25     | 3.68 | 3.04 | 3.35 | 3.66 | 3.08 | 3.29 | 3.54 | 3.4  |
| IFNLR1       | 3.22 | 3.71 | 3.27 | 3.72 | 4    | 3.29 | 3.87 | 4.07 |
| RAB11FIP2    | 2.11 | 2.36 | 2.98 | 2.78 | 3.04 | 3.29 | 4.49 | 4.22 |
| BDNF         | 3.63 | 3.34 | 3.97 | 3.86 | 3.93 | 3.29 | 4.49 | 4.27 |
| SRBD1        | 3.04 | 2.59 | 3.62 | 3.46 | 3.41 | 3.29 | 5.72 | 4.35 |
| SRFBP1       | 2.69 | 3.14 | 3.33 | 3.48 | 3.19 | 3.29 | 5.37 | 4.61 |
| NAPEPLD      | 3.06 | 3.35 | 4.04 | 4.4  | 3.43 | 3.29 | 5.34 | 4.92 |
| SATB1        | 3.29 | 3.7  | 3.8  | 4.25 | 3.27 | 3.29 | 4.96 | 5.28 |
| VPS13A       | 2.67 | 2.62 | 2.92 | 3.59 | 3.25 | 3.29 | 6.64 | 5.78 |
| DND1         | 3.68 | 2.95 | 2.78 | 3.44 | 3.05 | 3.3  | 2.26 | 2.01 |
| CCDC189      | 2.76 | 2.72 | 2.93 | 2.83 | 3.48 | 3.3  | 3.1  | 3.04 |
| GDAP2        | 2.74 | 2.81 | 2.68 | 3.15 | 3.32 | 3.3  | 3.75 | 3.06 |
| PLEKHO2      | 3.89 | 3.72 | 3.41 | 3.36 | 3.32 | 3.3  | 2.85 | 3.33 |
| ZNF329       | 3.37 | 3.79 | 3.74 | 3.46 | 3.71 | 3.3  | 4    | 3.33 |
| IQCE         | 3.93 | 3.61 | 3.86 | 3.98 | 4.18 | 3.3  | 3.75 | 3.51 |
| SLC35F3      | 4.28 | 4.53 | 4.29 | 4.36 | 3.45 | 3.3  | 3.67 | 3.6  |
| PCSK5        | 3.76 | 3.39 | 4.03 | 3.97 | 3.31 | 3.3  | 3.39 | 3.78 |
| ARHGAP26     | 3.07 | 3.05 | 3.52 | 3.23 | 2.94 | 3.3  | 3.47 | 4.03 |
| MLH3         | 2.99 | 2.45 | 3.6  | 3.7  | 2.83 | 3.3  | 5.18 | 4.07 |
| SENP1        | 3.21 | 2.88 | 3.64 | 4.36 | 3.5  | 3.3  | 4.74 | 4.26 |
| WHAMM        | 3.61 | 3.36 | 3.94 | 4.14 | 3.72 | 3.3  | 5.26 | 4.52 |
| LMBRD2       | 3.46 | 3.68 | 4.45 | 4.58 | 4.19 | 3.3  | 6.97 | 5.06 |
| HS3ST3A1     | 3.29 | 3.06 | 3.06 | 3.17 | 3.21 | 3.31 | 2.7  | 2.81 |
| FOXC1        | 3.86 | 3.79 | 3.63 | 3.59 | 2.95 | 3.31 | 3.12 | 3.18 |
| ZNF517       | 3.67 | 3.5  | 3.99 | 3.51 | 2.72 | 3.31 | 2.67 | 3.22 |
| EPB41L1      | 2.24 | 2.79 | 2.84 | 2.56 | 3.4  | 3.31 | 2.98 | 3.44 |
| ZNF560       | 2.72 | 2.88 | 2.99 | 3.89 | 3.58 | 3.31 | 3.7  | 3.66 |
| SEMA5A       | 3.44 | 3.32 | 3.94 | 4.2  | 3.12 | 3.31 | 4.04 | 3.87 |
| CLSPN        | 3    | 2.49 | 3.56 | 4.02 | 3.28 | 3.31 | 4.68 | 3.99 |
| ZNF841       | 2.82 | 2.12 | 3.03 | 3.92 | 3.26 | 3.31 | 4.62 | 4.15 |
| KIF15        | 2.99 | 2.37 | 3.42 | 4.06 | 3.33 | 3.31 | 5.97 | 4.84 |
| TMEM260      | 3.33 | 3.52 | 3.78 | 4.42 | 3.79 | 3.31 | 4.23 | 4.87 |
| FAM117A      | 3    | 3.46 | 4.17 | 3.54 | 3.21 | 3.32 | 2.78 | 3.28 |
| LY6G5B       | 2.09 | 2.15 | 1.24 | 2.87 | 2.92 | 3.32 | 3.89 | 3.29 |
| GABPB2       | 3.22 | 2.62 | 3.04 | 3.83 | 2.96 | 3.32 | 3.49 | 3.38 |
| MCM10        | 4.08 | 3.25 | 4.24 | 4.58 | 3.78 | 3.32 | 4.71 | 3.92 |
| ZBTB26       | 2.39 | 2.9  | 3.11 | 3.19 | 3.28 | 3.32 | 4.84 | 3.95 |
| NOVA1        | 3.3  | 3.24 | 3.22 | 4.31 | 3.27 | 3.33 | 3.92 | 3.34 |
| PHKA1        | 3.02 | 2.7  | 3.06 | 3.21 | 3.53 | 3.33 | 3.92 | 3.67 |
| NRDE2        | 3    | 3.4  | 3.16 | 3.26 | 3.38 | 3.33 | 3.85 | 3.85 |
| HINT3        | 3.29 | 2.79 | 3.07 | 4.01 | 3.05 | 3.33 | 5.31 | 4.56 |
| TUBD1        | 2.77 | 2.08 | 3.56 | 3.96 | 3.28 | 3.33 | 6.24 | 4.59 |
| WDR19        | 3.14 | 3.01 | 3.49 | 3.98 | 3.69 | 3.33 | 5.42 | 4.73 |
| FKBP14       | 3.14 | 2.64 | 3.54 | 3.67 | 3.31 | 3.33 | 5.84 | 4.95 |
| NP1PB6       | 3.61 | 2.66 | 4.51 | 4.76 | 4.12 | 3.33 | 6.88 | 6.1  |
| RFX2         | 2.91 | 3.14 | 3.28 | 2.67 | 3.16 | 3.34 | 2.62 | 2.92 |
| LOC105372731 | 2.76 | 3.35 | 2.78 | 2.87 | 3.01 | 3.34 | 2.65 | 3.01 |
| SHPK         | 3.28 | 3.6  | 3.08 | 3.14 | 2.95 | 3.34 | 3.1  | 3.25 |
| LCAT         | 2.99 | 2.63 | 2.07 | 2.04 | 3.18 | 3.34 | 3.57 | 3.26 |
| NPHP1        | 2.63 | 2.8  | 3.2  | 3.3  | 2.8  | 3.34 | 4.69 | 3.45 |
| S1PR2        | 3.5  | 3.77 | 3.33 | 3.8  | 3.02 | 3.34 | 3.14 | 3.47 |
| FGFR1OP      | 3.28 | 2.5  | 3.32 | 4.19 | 3.64 | 3.34 | 6.16 | 4.65 |
| ZNF667       | 2.95 | 2.25 | 3.1  | 3.75 | 3.37 | 3.34 | 5.72 | 4.7  |
| TRAF5        | 3.07 | 2.59 | 3.6  | 4.07 | 3.24 | 3.34 | 6.03 | 4.71 |
| ZKSCAN8      | 3.95 | 3.65 | 4.36 | 5.5  | 3.44 | 3.34 | 5.93 | 5.33 |
| PIK3C2B      | 2.99 | 2.85 | 2.73 | 3.25 | 2.96 | 3.35 | 3.3  | 3    |
| PPP2R1B      | 2.79 | 3.15 | 2.85 | 3.17 | 3.23 | 3.35 | 3.95 | 3.4  |
| TBC1D24      | 3.52 | 3.52 | 3.51 | 3.52 | 3.61 | 3.35 | 3.83 | 3.55 |
| WDR31        | 3.55 | 3.39 | 3.67 | 3.68 | 3.56 | 3.35 | 3.48 | 3.58 |
| ETS1         | 3.12 | 2.49 | 3.24 | 3.65 | 3.72 | 3.35 | 4.27 | 4.18 |
| DNAJC24      | 2.54 | 2.54 | 3.16 | 2.94 | 3.27 | 3.35 | 4.81 | 4.66 |
| SENP7        | 2.89 | 3.53 | 4.56 | 4.96 | 4    | 3.35 | 5.45 | 5.55 |
| FAM110B      | 3.06 | 3.29 | 3.52 | 3.65 | 3.1  | 3.36 | 3.08 | 2.54 |
| BMP4         | 3.7  | 4.15 | 3.84 | 3.86 | 2.95 | 3.36 | 2.57 | 2.85 |
| NBPF12       | 3.09 | 2.92 | 3.33 | 3.69 | 3.15 | 3.36 | 4.43 | 3.73 |
| ZNF236       | 3.25 | 2.72 | 3.49 | 3.6  | 3.6  | 3.36 | 4.72 | 3.9  |
| ARRDC3       | 3.24 | 3.28 | 4.1  | 4.88 | 3.5  | 3.36 | 5.62 | 4.17 |
| FNDC4        | 3.16 | 2.81 | 2.54 | 2.25 | 2.75 | 3.37 | 2.03 | 2.43 |
| FCHO1        | 3.46 | 3.56 | 3.19 | 3.28 | 2.74 | 3.37 | 2.93 | 2.98 |

|           |      |      |      |      |      |      |      |      |
|-----------|------|------|------|------|------|------|------|------|
| KIAA1549L | 2.86 | 2.91 | 2.91 | 2.69 | 2.55 | 3.37 | 3.53 | 3.19 |
| LBH       | 4.33 | 5.05 | 4.76 | 4.7  | 4.55 | 3.37 | 3.77 | 3.24 |
| ZNF564    | 2.86 | 2.53 | 3.58 | 3.33 | 3.47 | 3.37 | 4.66 | 4.05 |
| DYRK2     | 3.25 | 2.68 | 3.36 | 3.56 | 3.14 | 3.37 | 4.12 | 4.08 |
| WDR5B     | 3.45 | 2.98 | 3.45 | 3.72 | 3.49 | 3.37 | 5.26 | 4.24 |
| UTP15     | 2.67 | 2.64 | 3.12 | 4.05 | 3.68 | 3.37 | 5.27 | 4.43 |
| ZBTB6     | 2.82 | 2.83 | 3.55 | 3.87 | 3.51 | 3.37 | 5.73 | 4.43 |
| KLHL23    | 2.85 | 2.85 | 3.42 | 4.28 | 3.79 | 3.37 | 4.26 | 4.62 |
| TRAPPC13  | 2.59 | 2.61 | 3.15 | 4.09 | 3.71 | 3.37 | 6.07 | 5.06 |
| MTR       | 3.19 | 3.03 | 4.03 | 4.71 | 4    | 3.37 | 5.39 | 5.21 |
| ZNF676    | 2.98 | 3.22 | 4.01 | 4.64 | 3.65 | 3.37 | 6.28 | 5.32 |
| SHROOM3   | 4.14 | 3.52 | 4.01 | 3.59 | 3.4  | 3.38 | 3.76 | 3.46 |
| USP2      | 3.65 | 3.22 | 3.27 | 3.43 | 3.67 | 3.38 | 3.31 | 3.55 |
| EMP1      | 3.73 | 3.63 | 3.86 | 4.14 | 3.76 | 3.38 | 4.31 | 3.63 |
| METAP1D   | 2.82 | 2.78 | 3.11 | 3.81 | 3.83 | 3.38 | 4.47 | 4.36 |
| FAM117B   | 3.04 | 2.84 | 4.17 | 3.76 | 3.15 | 3.38 | 4.88 | 4.45 |
| FBXL3     | 3.33 | 2.75 | 3.61 | 3.76 | 3.29 | 3.38 | 5.42 | 4.56 |
| ZCCHC6    | 3.25 | 2.65 | 3.55 | 4.21 | 3.52 | 3.38 | 5.98 | 5.14 |
| PARPBP    | 2.49 | 2.35 | 2.83 | 3.23 | 3.14 | 3.39 | 4.84 | 3.63 |
| IL17RD    | 4.09 | 3.58 | 3.84 | 4.19 | 3.52 | 3.39 | 3.93 | 3.94 |
| C5orf45   | 3.59 | 3.93 | 3.14 | 3.6  | 4.21 | 3.39 | 4.23 | 4.14 |
| WRN       | 2.94 | 2.67 | 3.24 | 4.28 | 3.37 | 3.39 | 5.23 | 4.47 |
| NXT2      | 3.46 | 3.77 | 4.43 | 4.1  | 3.62 | 3.39 | 6.16 | 4.92 |
| PLEKHA4   | 5.29 | 5.08 | 4.44 | 4.88 | 3.35 | 3.4  | 2.38 | 2.64 |
| COX19     | 2.74 | 3.01 | 3.02 | 2.79 | 3.71 | 3.4  | 3.15 | 3.34 |
| POU4F1    | 2.75 | 2.33 | 2.8  | 3.05 | 2.86 | 3.4  | 3.7  | 3.34 |
| MTFR2     | 2.59 | 2.07 | 2.56 | 2.27 | 2.82 | 3.4  | 4.19 | 3.56 |
| SNRK      | 3.56 | 3.12 | 3.53 | 4.67 | 3.28 | 3.4  | 4.57 | 4.07 |
| ZNF880    | 3.26 | 3.94 | 3.97 | 5.06 | 4.22 | 3.4  | 4.43 | 4.14 |
| CCSAP     | 2.92 | 2.48 | 3.57 | 3.8  | 3.52 | 3.4  | 4.66 | 4.38 |
| ZBTB1     | 3.57 | 3.49 | 3.77 | 3.94 | 3.42 | 3.4  | 5.28 | 4.62 |
| SLC38A4   | 4.65 | 4.27 | 4.74 | 5.86 | 3.69 | 3.4  | 5.39 | 5.03 |
| FAM120C   | 3.25 | 3.25 | 3.57 | 4.41 | 3.37 | 3.41 | 4.18 | 2.98 |
| INPP5B    | 3.43 | 3.62 | 3.19 | 3.54 | 3.74 | 3.41 | 3.41 | 3.1  |
| COQ2      | 2.75 | 2.49 | 3.13 | 2.41 | 3.37 | 3.41 | 4.02 | 3.45 |
| AMACR     | 3.43 | 3.09 | 3.12 | 3.39 | 3.57 | 3.41 | 4.09 | 3.9  |
| NAV2      | 3.46 | 3.27 | 3.33 | 3.7  | 3.8  | 3.41 | 4.04 | 4.12 |
| PEX12     | 3.85 | 3.5  | 4    | 3.81 | 4.18 | 3.41 | 3.86 | 4.26 |
| WDR89     | 2.94 | 2.7  | 3.14 | 3.44 | 3.57 | 3.41 | 4.6  | 4.27 |
| FAM122C   | 4.98 | 3.59 | 3.92 | 4.21 | 3.88 | 3.41 | 5.59 | 4.63 |
| SACS      | 2.21 | 1.93 | 2.82 | 3.27 | 3.32 | 3.41 | 6.97 | 5.5  |
| CCDC125   | 2.85 | 3.05 | 2.81 | 3.68 | 3.44 | 3.42 | 3.98 | 2.85 |
| IGF2BP1   | 3.79 | 3.55 | 3.72 | 3.52 | 3.18 | 3.42 | 3.53 | 3.39 |
| BBS7      | 2.35 | 2.36 | 3.07 | 3.38 | 3.17 | 3.42 | 4.27 | 4.28 |
| FASTKD2   | 3.14 | 3.03 | 3.6  | 3.69 | 3.53 | 3.42 | 5.36 | 4.59 |
| ARMCX5    | 3.6  | 3.06 | 3.85 | 4.94 | 3.55 | 3.42 | 5.66 | 4.64 |
| LINS1     | 2.96 | 2.48 | 3.6  | 3.81 | 3.43 | 3.42 | 6.14 | 4.86 |
| FAM217B   | 3.34 | 2.84 | 4.06 | 4.41 | 3.89 | 3.42 | 6.16 | 4.88 |
| NUDT17    | 3.27 | 3.61 | 2.92 | 3.4  | 3.38 | 3.43 | 3.23 | 2.79 |
| EEF1A2    | 2.86 | 2.91 | 2.84 | 2.77 | 3.84 | 3.43 | 2.81 | 2.95 |
| FBXO10    | 2.79 | 3.16 | 3.31 | 3.4  | 2.61 | 3.43 | 3.08 | 3.17 |
| NHEJ1     | 3    | 3.39 | 3.65 | 2.89 | 3.69 | 3.43 | 3.54 | 4.01 |
| RSBN1     | 3.45 | 3.25 | 3.69 | 4.13 | 3.47 | 3.43 | 4.21 | 4.02 |
| ERMAP     | 3.78 | 3.59 | 3.51 | 4.46 | 3.5  | 3.43 | 3.97 | 4.1  |
| TBC1D3L   | 3.26 | 2.59 | 3.37 | 5.14 | 3.94 | 3.43 | 3.52 | 4.3  |
| RSC1A1    | 3.35 | 3.43 | 3.74 | 4.4  | 3.56 | 3.43 | 5.92 | 5.05 |
| TMF1      | 3    | 2.9  | 3.45 | 4.01 | 3.47 | 3.43 | 6.37 | 5.32 |
| LRRC29    | 2.8  | 2.73 | 3    | 3.03 | 3.1  | 3.44 | 1.78 | 3.41 |
| SH2D5     | 2.76 | 2.59 | 2.92 | 2.94 | 3.68 | 3.44 | 3.23 | 3.46 |
| CDKAL1    | 3.47 | 3.1  | 3.64 | 3.66 | 3.63 | 3.44 | 4.5  | 3.49 |
| BAMBI     | 3.17 | 4.09 | 3.89 | 3.45 | 3.43 | 3.44 | 2.85 | 3.67 |
| STK33     | 3.06 | 2.81 | 2.94 | 3.49 | 3.77 | 3.44 | 4.44 | 4.03 |
| LRRC8B    | 2.87 | 2.26 | 2.88 | 3.72 | 3.34 | 3.44 | 4.86 | 4.17 |
| RRAGB     | 3.5  | 3.2  | 4.11 | 3.42 | 3.8  | 3.44 | 4.35 | 4.67 |
| HELLS     | 3.78 | 3.6  | 4.2  | 4.47 | 3.8  | 3.44 | 5.49 | 4.81 |
| BATF2     | 5.36 | 5.54 | 5.67 | 5.09 | 2.86 | 3.45 | 2.85 | 2.71 |
| MYL9      | 3.59 | 3.71 | 4.26 | 4.14 | 2.82 | 3.45 | 2.69 | 3.55 |
| ARHGAP19  | 3.35 | 3.18 | 3.16 | 3.23 | 3.6  | 3.45 | 4.19 | 3.6  |
| TULP4     | 2.84 | 2.78 | 3.13 | 3.7  | 3.39 | 3.45 | 3.91 | 3.96 |
| DAGLA     | 3.37 | 3.38 | 3.37 | 3.4  | 3.16 | 3.46 | 2.81 | 2.81 |
| WNT7B     | 3.04 | 3.7  | 2.98 | 3.05 | 3.34 | 3.46 | 3.01 | 3.37 |
| IDNK      | 4.13 | 4.15 | 3.66 | 4.15 | 3.3  | 3.46 | 3.77 | 3.71 |
| LRRC16A   | 3.3  | 3.37 | 3.62 | 3.83 | 3.7  | 3.46 | 4.36 | 4.19 |
| IFIT5     | 4.54 | 4.33 | 4.69 | 5.78 | 3.58 | 3.46 | 5.48 | 4.32 |
| NOV       | 3.15 | 2.95 | 3.06 | 3.05 | 3.85 | 3.46 | 3.86 | 4.39 |
| ZNF211    | 2.99 | 2.84 | 3.31 | 3.87 | 3.65 | 3.46 | 5.19 | 4.4  |
| INSIG2    | 3.99 | 3.7  | 4.31 | 4.79 | 2.89 | 3.46 | 5.04 | 4.51 |
| ITSN2     | 2.73 | 2.69 | 3.54 | 4.3  | 3.25 | 3.46 | 5.25 | 4.54 |
| EPB41L5   | 3.42 | 3.59 | 4.21 | 3.88 | 3.96 | 3.46 | 5.37 | 4.61 |
| CBWD3     | 2.58 | 2.16 | 3.01 | 5.86 | 3.56 | 3.46 | 6.41 | 4.61 |
| IFT88     | 3.29 | 2.92 | 4.11 | 4.14 | 3.35 | 3.46 | 5.83 | 4.64 |
| PITPNM2   | 3.31 | 3.17 | 3.27 | 3.01 | 3.1  | 3.47 | 3.32 | 3.05 |
| DOPEY2    | 3.58 | 3.69 | 3.66 | 4.12 | 3.48 | 3.47 | 3.61 | 3.53 |
| OSGIN1    | 3.55 | 3.91 | 3.66 | 3.74 | 3.54 | 3.47 | 2.75 | 3.81 |
| ZCCHC2    | 3.69 | 3.59 | 4.08 | 4.56 | 3.21 | 3.47 | 4.16 | 4.02 |

|              |      |      |      |      |      |      |      |      |
|--------------|------|------|------|------|------|------|------|------|
| MYCBP2       | 2.9  | 2.7  | 3.7  | 4.01 | 3.25 | 3.47 | 4.88 | 4.41 |
| CCDC181      | 2.94 | 3.26 | 3.26 | 3.55 | 2.77 | 3.47 | 4.32 | 4.43 |
| C2orf76      | 3.55 | 4.81 | 3.47 | 3.56 | 4.02 | 3.47 | 4.79 | 4.65 |
| CGREF1       | 3.88 | 3.35 | 3.46 | 3.34 | 2.84 | 3.48 | 3.01 | 3.32 |
| RGL1         | 3.33 | 3.45 | 3.44 | 4.19 | 3.51 | 3.48 | 3.72 | 3.87 |
| CECR2        | 3.53 | 3.49 | 3.63 | 3.82 | 3.44 | 3.48 | 4.27 | 3.92 |
| TMEM184A     | 3.63 | 3.71 | 4.17 | 3.89 | 3.65 | 3.48 | 3.05 | 3.98 |
| RBM45        | 3.25 | 3.46 | 3.65 | 4.66 | 3.51 | 3.48 | 4.52 | 4.03 |
| SNX10        | 3.46 | 3.79 | 4.24 | 4.29 | 3.14 | 3.48 | 5.29 | 4.79 |
| DCP1A        | 4.11 | 3.84 | 4.41 | 4.68 | 4.17 | 3.48 | 5.63 | 4.81 |
| METTL14      | 3.14 | 2.84 | 3.97 | 4.48 | 3.66 | 3.48 | 5.27 | 4.86 |
| POLI         | 3.9  | 3.35 | 3.72 | 4.06 | 3.1  | 3.48 | 5.87 | 5.23 |
| PRRT3        | 5.82 | 5.48 | 5.44 | 5.28 | 3.13 | 3.49 | 2.38 | 2.95 |
| WBSCR28      | 5.29 | 4.72 | 4.17 | 4.78 | 4.01 | 3.49 | 3.18 | 2.98 |
| NEU3         | 3.76 | 2.87 | 3.55 | 3.81 | 3.75 | 3.49 | 3.52 | 4.21 |
| ACSL5        | 3.81 | 3.16 | 3.5  | 3.17 | 4.22 | 3.49 | 4.44 | 4.21 |
| PLA2G4A      | 3.34 | 3.27 | 3.84 | 4.5  | 4.25 | 3.49 | 5.9  | 4.93 |
| GPR37        | 3.08 | 3.04 | 3.07 | 3.34 | 3.37 | 3.5  | 3.11 | 3.13 |
| RAB15        | 4.23 | 3.8  | 3.98 | 3.9  | 3.64 | 3.5  | 3.55 | 4.22 |
| SOS2         | 2.99 | 2.97 | 3.57 | 4.29 | 3.36 | 3.5  | 5.77 | 4.94 |
| DRD4         | 2.69 | 3.12 | 2.37 | 2.49 | 3.06 | 3.51 | 2.21 | 2.71 |
| ELMO1        | 2.81 | 3.14 | 2.73 | 2.7  | 3.56 | 3.51 | 3.11 | 3.14 |
| FAAP24       | 3.81 | 3.32 | 3.75 | 3.42 | 3.35 | 3.51 | 3.41 | 3.15 |
| LOC728392    | 3.64 | 3.87 | 3.64 | 4.22 | 3.57 | 3.51 | 3.26 | 3.2  |
| TASP1        | 2.92 | 2.77 | 3.14 | 3.84 | 3.82 | 3.51 | 4.16 | 3.59 |
| C18orf25     | 2.95 | 2.59 | 3.5  | 3.83 | 3.38 | 3.51 | 4.58 | 4.25 |
| SLC25A16     | 2.4  | 1.92 | 2.87 | 2.82 | 3.35 | 3.51 | 4.23 | 4.31 |
| NIPSNAP3A    | 4.16 | 4.22 | 4.79 | 3.94 | 3.97 | 3.51 | 5.4  | 4.67 |
| ODF3B        | 3.81 | 4.54 | 3.76 | 3.74 | 2.36 | 3.52 | 1.78 | 2.33 |
| SSC4D        | 5.53 | 6.63 | 5.34 | 5.09 | 3.66 | 3.52 | 2.6  | 3.18 |
| LOC101930307 | 3.11 | 2.21 | 2.88 | 3.15 | 3    | 3.52 | 4.29 | 3.89 |
| LOC642249    | 2.53 | 2.32 | 3.42 | 3.81 | 3.33 | 3.52 | 4.73 | 3.96 |
| NAA16        | 2.94 | 2.42 | 2.67 | 4.11 | 2.84 | 3.52 | 5.78 | 4.2  |
| C14orf142    | 4.08 | 3.5  | 3.79 | 4.47 | 3.64 | 3.52 | 5.49 | 4.55 |
| HDAC9        | 2.96 | 3.51 | 3.29 | 4.35 | 4.13 | 3.52 | 6.01 | 4.86 |
| NUBPL        | 3.58 | 3.39 | 3.62 | 4.43 | 3.84 | 3.52 | 5.34 | 4.92 |
| LOC389831    | 3.87 | 2.45 | 3.86 | 4.72 | 4.19 | 3.52 | 5.63 | 5.03 |
| NPIP15       | 3.67 | 2.3  | 3.68 | 4.25 | 4.02 | 3.52 | 6.66 | 5.2  |
| CRLF1        | 9.04 | 9.04 | 8.28 | 7.22 | 3.04 | 3.53 | 1.66 | 3.15 |
| SULT1A1      | 4.84 | 4.85 | 4.85 | 3.78 | 3.75 | 3.53 | 3.69 | 3.4  |
| ZBTB44       | 2.42 | 2.69 | 2.94 | 3.53 | 3.29 | 3.53 | 4.41 | 3.63 |
| AMOT         | 3.82 | 3.88 | 4    | 4.26 | 3.58 | 3.53 | 4.03 | 4.12 |
| CEP76        | 4.14 | 2.5  | 3.49 | 3.68 | 4.01 | 3.53 | 5.41 | 4.34 |
| HTR7         | 2.38 | 2.55 | 2.53 | 2.94 | 3.75 | 3.53 | 4.11 | 4.42 |
| PITX2        | 3.41 | 3.39 | 3.77 | 3.5  | 3.45 | 3.54 | 3.8  | 3.33 |
| PECR         | 3.92 | 3.97 | 3.64 | 4.23 | 4.25 | 3.54 | 5.25 | 3.73 |
| FER          | 2.66 | 2.32 | 2.94 | 4.02 | 2.49 | 3.54 | 5.4  | 3.92 |
| SLC31A2      | 3.33 | 3.44 | 3.8  | 3.26 | 4.53 | 3.54 | 4.69 | 4.22 |
| RAD51AP1     | 3.1  | 3.34 | 3.65 | 4.01 | 3.71 | 3.54 | 5.89 | 4.58 |
| SLC5A3       | 3.51 | 3.16 | 4.05 | 4.48 | 3.7  | 3.54 | 5.94 | 5.18 |
| TRMT13       | 3.5  | 2.77 | 3.28 | 3.75 | 3.29 | 3.54 | 6.94 | 5.89 |
| U2AF1L4      | 3.05 | 2.81 | 2.69 | 3.11 | 2.78 | 3.55 | 2.57 | 2.99 |
| DLX6         | 3.85 | 3.52 | 3.68 | 3.44 | 3.42 | 3.55 | 3.5  | 3.82 |
| SIRT1        | 2.77 | 2.79 | 3.66 | 4.38 | 3.49 | 3.55 | 5.11 | 4.26 |
| SFXN2        | 3.53 | 3.43 | 3.86 | 3.77 | 3.99 | 3.55 | 4.03 | 4.27 |
| UTRN         | 2.76 | 2.82 | 3.85 | 4.76 | 3.74 | 3.55 | 6.22 | 5.48 |
| NFAT5        | 3.29 | 2.68 | 3.78 | 4.55 | 3.56 | 3.55 | 6.57 | 5.71 |
| UBE2D1       | 3.47 | 3.41 | 3.33 | 3.37 | 3.57 | 3.56 | 5.04 | 3.94 |
| ADAL         | 3.73 | 2.79 | 3.36 | 3.74 | 3.98 | 3.56 | 5.03 | 4.27 |
| CMTR2        | 3.32 | 3.04 | 3.32 | 4.09 | 3.49 | 3.56 | 5.04 | 4.68 |
| B3GNT5       | 3.19 | 3.05 | 3.45 | 4.17 | 3.62 | 3.56 | 6.06 | 5.17 |
| WDCP         | 3.5  | 3.3  | 3.46 | 3.6  | 3.6  | 3.57 | 5.02 | 4.17 |
| TMED7-TICAM2 | 3.62 | 3.77 | 3.8  | 4.29 | 3.82 | 3.57 | 4.78 | 4.54 |
| ZFP1         | 3.72 | 3.32 | 4.21 | 4.83 | 3.99 | 3.57 | 5.93 | 4.92 |
| CCPG1        | 3.65 | 3.41 | 4.23 | 4.95 | 3.7  | 3.57 | 6.66 | 5.16 |
| SAMD5        | 3.27 | 3.37 | 3.99 | 4.74 | 3.74 | 3.57 | 5.52 | 5.54 |
| SASH1        | 2.89 | 2.45 | 3.44 | 3.77 | 3.58 | 3.58 | 4.19 | 3.83 |
| MARS2        | 3.01 | 2.92 | 3.69 | 3.16 | 3.85 | 3.58 | 3.94 | 3.96 |
| ATP6AP1L     | 3.56 | 3.55 | 3.85 | 4.18 | 4.02 | 3.58 | 5.02 | 4.67 |
| ZNF226       | 3.02 | 3.39 | 3.3  | 3.67 | 4.07 | 3.58 | 5.11 | 4.69 |
| F5           | 4.59 | 5.12 | 4.98 | 5.77 | 3.37 | 3.58 | 4.52 | 4.77 |
| KIF3A        | 3.06 | 3.08 | 3.75 | 4.7  | 3.74 | 3.58 | 5.89 | 6.06 |
| POU5F1       | 3.46 | 3.3  | 4.26 | 4.69 | 3.5  | 3.59 | 4.62 | 3.73 |
| MID2         | 3.97 | 3.66 | 4.51 | 4.65 | 3.52 | 3.59 | 4.5  | 4.02 |
| GPC6         | 3.28 | 2.94 | 3.85 | 3.7  | 3.65 | 3.59 | 4.77 | 4.54 |
| SUV39H2      | 3.38 | 2.83 | 3.54 | 3.84 | 3.72 | 3.59 | 5.73 | 4.88 |
| PRR14L       | 3.25 | 2.91 | 3.77 | 4.38 | 3.79 | 3.59 | 5.22 | 5.25 |
| TMEM143      | 3.16 | 2.67 | 3.06 | 2.61 | 3.14 | 3.6  | 2.55 | 3.35 |
| VANGL1       | 3.74 | 3.77 | 3.81 | 3.57 | 3.41 | 3.6  | 3.42 | 3.55 |
| PARP16       | 4.27 | 4.32 | 4.08 | 4.13 | 3.66 | 3.6  | 4.11 | 3.6  |



|          |      |      |      |      |      |      |      |      |
|----------|------|------|------|------|------|------|------|------|
| TRAF6    | 3.02 | 3.31 | 3.31 | 3.84 | 3.5  | 3.6  | 4.19 | 4.01 |
| CNKSR3   | 5.22 | 4.77 | 4.69 | 4.7  | 3.74 | 3.6  | 3.66 | 4.02 |
| ESCO1    | 3.24 | 3.02 | 3.27 | 3.28 | 3.14 | 3.6  | 5.51 | 4.52 |
| LRRC49   | 2.86 | 2.83 | 3.27 | 3.34 | 3.67 | 3.6  | 5.08 | 4.58 |
| FRRS1    | 3.99 | 3.35 | 4.34 | 4.63 | 3.66 | 3.6  | 5.21 | 5.14 |
| GCC2     | 2.28 | 2.53 | 2.87 | 3.65 | 3.1  | 3.6  | 6.55 | 5.84 |
| TEAD3    | 3.93 | 3.91 | 3.86 | 4.2  | 3.54 | 3.61 | 2.82 | 3.36 |
| TTC39B   | 2.85 | 2.94 | 3.38 | 3.34 | 3.12 | 3.61 | 4.52 | 3.77 |
| L3MBTL3  | 3.85 | 3.44 | 4.2  | 4.46 | 3.59 | 3.61 | 4.71 | 4.06 |
| WDR27    | 2.7  | 3.12 | 3.17 | 3.75 | 3.54 | 3.61 | 5.09 | 4.3  |
| DCLRE1C  | 2.99 | 2.78 | 3.39 | 4.33 | 3.02 | 3.61 | 4.97 | 4.69 |
| FGF13    | 2.59 | 2.42 | 2.15 | 2.49 | 3.61 | 3.62 | 3.52 | 3.37 |
| RAB7B    | 2.95 | 3.68 | 3.55 | 3.45 | 2.9  | 3.62 | 2.83 | 3.48 |
| ZNF275   | 3.8  | 3.67 | 3.87 | 4.18 | 3.74 | 3.62 | 3.86 | 3.68 |
| IDO1     | 3.57 | 3.07 | 3.21 | 4.24 | 4.49 | 3.62 | 3.05 | 4.09 |
| PCCA     | 3.28 | 2.91 | 3.3  | 3.42 | 3.18 | 3.62 | 4.54 | 4.17 |
| MTPAP    | 2.81 | 2.89 | 3.11 | 3.54 | 3.66 | 3.62 | 4.87 | 4.3  |
| MAGI3    | 3.22 | 2.86 | 3.6  | 4.11 | 3.28 | 3.62 | 4.75 | 4.41 |
| AMMECR1  | 3.35 | 2.83 | 3.95 | 3.4  | 3.48 | 3.62 | 5.08 | 4.52 |
| C12orf29 | 3.48 | 3.08 | 3.33 | 3.61 | 4.15 | 3.62 | 6.08 | 4.75 |
| PCDHB12  | 4.42 | 4.18 | 4.38 | 4.77 | 3.69 | 3.63 | 4.06 | 4.48 |
| ZNF37A   | 3.2  | 3.23 | 3.74 | 4.1  | 3.57 | 3.63 | 7.07 | 5.66 |
| SBK1     | 3.9  | 4.15 | 3.92 | 3.74 | 3.36 | 3.64 | 2.67 | 3.01 |
| CLEC18B  | 5.82 | 5.2  | 4.91 | 4.02 | 2.42 | 3.64 | 2.85 | 3.13 |
| PHLPP1   | 3.83 | 3.63 | 3.45 | 3.72 | 3.3  | 3.64 | 3.04 | 3.2  |
| COPZ2    | 4.4  | 5.38 | 4.33 | 5.08 | 4.6  | 3.64 | 2.68 | 3.7  |
| TXNRD3   | 3.05 | 3.66 | 3.88 | 3.56 | 3.56 | 3.64 | 4.34 | 3.79 |
| ZNF140   | 3.44 | 3.68 | 3.62 | 4.29 | 3.42 | 3.64 | 5.36 | 4.69 |
| UTP20    | 3.31 | 2.8  | 3.46 | 4.28 | 3.73 | 3.64 | 5.44 | 4.82 |
| GLMN     | 3.57 | 3.13 | 3.24 | 4.01 | 4.13 | 3.64 | 6.16 | 4.98 |
| XRN1     | 3.3  | 2.84 | 3.47 | 4.85 | 2.65 | 3.64 | 6.35 | 5.2  |
| ZNF559   | 3.74 | 2.92 | 3.8  | 4.16 | 3.93 | 3.64 | 6.19 | 5.22 |
| PCBD2    | 2.81 | 2.4  | 2.99 | 3.48 | 3.11 | 3.65 | 4.08 | 3.32 |
| NECTIN4  | 2.82 | 3.17 | 3.03 | 2.28 | 3.58 | 3.65 | 3.12 | 3.33 |
| ARHGEF25 | 3.79 | 4.46 | 3.58 | 4.14 | 3.54 | 3.65 | 3.5  | 3.38 |
| ADIG     | 2.87 | 3.71 | 2.94 | 3.66 | 4.55 | 3.65 | 2.94 | 3.49 |
| IL18     | 2.68 | 3.27 | 3.2  | 3.17 | 4.81 | 3.65 | 5.26 | 3.66 |
| LIN9     | 3.2  | 3.14 | 3.56 | 2.86 | 3.4  | 3.65 | 4.6  | 3.91 |
| DUSP16   | 3.56 | 3.14 | 3.79 | 3.77 | 3.45 | 3.65 | 4.34 | 4.03 |
| VPS13B   | 3.18 | 2.68 | 3.65 | 4.72 | 3.81 | 3.65 | 5.4  | 4.74 |
| SYNJ2BP  | 2.83 | 2.87 | 3.3  | 3.96 | 3.86 | 3.65 | 5.31 | 5.02 |
| BAGE2    | 3.41 | 2.61 | 3.85 | 4.29 | 3.31 | 3.65 | 5.64 | 5.02 |
| HCN3     | 3.04 | 3.35 | 3.26 | 3.4  | 3.4  | 3.66 | 3.72 | 3.77 |
| CRY2     | 4.05 | 3.98 | 3.87 | 3.64 | 3.67 | 3.66 | 3.31 | 3.83 |
| SFT2D2   | 3.08 | 3.25 | 4.16 | 4.02 | 2.78 | 3.66 | 4.95 | 4.43 |
| HMBOX1   | 2.91 | 2.9  | 3.28 | 3.92 | 3.33 | 3.66 | 4.73 | 4.56 |
| FAM200A  | 3    | 2.79 | 3.7  | 4.48 | 3.03 | 3.66 | 6.16 | 4.66 |
| ZNF621   | 2.99 | 3.15 | 3.86 | 3.87 | 3.53 | 3.66 | 5.14 | 5.23 |
| PYROXD2  | 2.97 | 3.24 | 4.11 | 4.3  | 4.07 | 3.66 | 4.94 | 5.36 |
| CLIP1    | 3.33 | 3.1  | 4.04 | 5.05 | 3.42 | 3.66 | 5.8  | 5.46 |
| DNAJB4   | 3.36 | 3.61 | 3.45 | 4.07 | 3.82 | 3.66 | 5.72 | 5.63 |
| UTP23    | 2.75 | 3.13 | 3.6  | 4.54 | 3.55 | 3.66 | 6.09 | 5.86 |
| WDR25    | 4.47 | 4.69 | 3.69 | 3.15 | 3.57 | 3.67 | 3.13 | 3.56 |
| CLCN4    | 3.65 | 3.73 | 3.88 | 3.88 | 3.53 | 3.67 | 4.4  | 4    |
| RBM15    | 3.67 | 3.58 | 3.68 | 4.31 | 3.98 | 3.67 | 4.63 | 4.64 |
| FRMD4B   | 3    | 2.74 | 3.44 | 3.95 | 3.89 | 3.67 | 5.2  | 5.08 |
| BACH1    | 3.31 | 2.98 | 3.95 | 5.24 | 3.77 | 3.67 | 6.96 | 5.27 |
| ZCCHC10  | 3.94 | 4.4  | 4.09 | 4.88 | 4.06 | 3.67 | 7.13 | 5.38 |
| NRGN     | 4.25 | 4.01 | 3.41 | 3.44 | 3.35 | 3.68 | 3.02 | 2.74 |
| PIBF1    | 3.47 | 3.26 | 3.92 | 3.59 | 3.22 | 3.68 | 5.82 | 4.47 |
| BDH2     | 3.28 | 3.33 | 3.03 | 3.59 | 3.49 | 3.68 | 4.4  | 4.55 |
| ZNF783   | 3.37 | 3.21 | 3.86 | 4.28 | 3.54 | 3.68 | 4.69 | 4.57 |
| CMTM4    | 3.6  | 3.02 | 3.73 | 3.72 | 3.96 | 3.68 | 4.46 | 4.63 |
| LATS1    | 3.71 | 3.73 | 4.54 | 4.95 | 3.31 | 3.68 | 5.43 | 5.37 |
| CCDC82   | 3.85 | 3.4  | 3.5  | 4.01 | 4.13 | 3.68 | 6.77 | 5.48 |
| DCAF17   | 3.69 | 3.09 | 3.46 | 4.34 | 3.76 | 3.68 | 6.12 | 5.82 |
| VGFB     | 3.2  | 2.45 | 2.49 | 2.8  | 3.35 | 3.69 | 3.23 | 3.08 |
| C19orf68 | 3.47 | 3.68 | 3.44 | 3.7  | 3.62 | 3.69 | 3.15 | 3.23 |
| PLCD4    | 4.15 | 4.21 | 4.3  | 4.06 | 3.95 | 3.69 | 3.86 | 3.79 |
| CBLB     | 3.69 | 3.58 | 4.36 | 4.2  | 3.59 | 3.69 | 4.34 | 4.02 |
| UVRAG    | 3.41 | 3.18 | 3.45 | 3.58 | 3.65 | 3.69 | 4.65 | 4.03 |
| EXOC8    | 3.11 | 3.02 | 3.54 | 3.9  | 3.62 | 3.69 | 4.33 | 4.42 |
| GSAP     | 3.46 | 2.99 | 3.86 | 4.02 | 3.78 | 3.69 | 5.35 | 5.19 |
| ALG6     | 3.96 | 3.66 | 4.23 | 4.28 | 4.58 | 3.69 | 6.38 | 5.5  |
| ATF1     | 3.28 | 3.16 | 3.93 | 4.53 | 4.24 | 3.69 | 6.61 | 5.79 |
| GORAB    | 3.76 | 3.13 | 4.21 | 4.76 | 4.68 | 3.69 | 6.85 | 5.98 |
| DHRX     | 3.72 | 3.33 | 3.59 | 2.97 | 3.51 | 3.7  | 2.89 | 2.71 |
| LOC81691 | 4.06 | 3.25 | 3.37 | 3.56 | 3.99 | 3.7  | 3.59 | 3.25 |
| JRK      | 3.88 | 4    | 4.58 | 3.91 | 3.93 | 3.7  | 4.01 | 3.74 |
| HAPLN3   | 5.14 | 5.15 | 4.52 | 4.86 | 4.88 | 3.7  | 3.16 | 3.88 |
| CENPI    | 2.6  | 2.57 | 3.28 | 3.97 | 3.98 | 3.7  | 4.78 | 4.55 |
| SMAD1    | 4.19 | 4.37 | 4.39 | 4.83 | 3.79 | 3.7  | 5.54 | 4.74 |
| XPO4     | 3.04 | 2.75 | 3.55 | 4.3  | 3.58 | 3.7  | 5.9  | 4.89 |
| CLK4     | 2.57 | 3    | 3.5  | 3.64 | 3.19 | 3.7  | 5.5  | 4.94 |
| SCX      | 2.67 | 2.87 | 2.43 | 2.13 | 3.31 | 3.71 | 3.05 | 3.15 |
| CENPL    | 3.26 | 3.38 | 3.22 | 3.3  | 3.98 | 3.71 | 4.62 | 3.73 |

|              |      |      |      |      |      |      |      |      |
|--------------|------|------|------|------|------|------|------|------|
| SRD5A3       | 4.76 | 4.38 | 4.81 | 4.82 | 4.02 | 3.71 | 4.1  | 3.78 |
| SSH2         | 3.52 | 2.93 | 3.06 | 3.59 | 3.13 | 3.71 | 3.68 | 4.29 |
| BMPR2        | 3.1  | 3.11 | 3.63 | 4.51 | 3.45 | 3.71 | 5.42 | 4.93 |
| C5orf51      | 2.89 | 2.67 | 3.52 | 4.79 | 3.74 | 3.71 | 7.05 | 5.81 |
| TBC1D9       | 2.66 | 2.84 | 2.86 | 3.23 | 3.66 | 3.72 | 4    | 3.99 |
| AGAP4        | 3.61 | 2.88 | 4.38 | 5.3  | 4.08 | 3.72 | 6.8  | 5.46 |
| GABPA        | 3.71 | 3.11 | 3.86 | 4.89 | 4.09 | 3.72 | 6.98 | 5.99 |
| SIK1         | 3.51 | 3.79 | 3.74 | 2.23 | 4.29 | 3.73 | 3.96 | 2.18 |
| POU3F1       | 3.71 | 3.46 | 3.1  | 3.14 | 3.96 | 3.73 | 3.01 | 3.22 |
| LOC391322    | 4.43 | 3.54 | 3.7  | 3.75 | 3.75 | 3.73 | 4.8  | 3.83 |
| FBXO16       | 3.99 | 4.17 | 5.12 | 3.93 | 4.72 | 3.73 | 5.58 | 4.04 |
| RASA4        | 3.71 | 3.98 | 4.09 | 3.22 | 3.63 | 3.73 | 3.03 | 4.33 |
| RPS6KA5      | 3.15 | 3.72 | 3.14 | 3.99 | 3.94 | 3.73 | 5.32 | 4.62 |
| GLTSCR1L     | 3.64 | 3.17 | 3.72 | 3.85 | 4.13 | 3.73 | 4.97 | 4.75 |
| RELT         | 4.23 | 3.77 | 4.02 | 3.74 | 4    | 3.74 | 3.32 | 3.47 |
| FAM122A      | 3.68 | 4.12 | 4.24 | 4.48 | 3.44 | 3.75 | 4.39 | 3.82 |
| FBXL7        | 3.94 | 3.65 | 4.06 | 4.51 | 3.25 | 3.75 | 3.79 | 4    |
| UHRF1BP1     | 3.98 | 3.94 | 4.03 | 4.28 | 3.87 | 3.75 | 4.35 | 4.27 |
| ABCC4        | 3.36 | 2.64 | 3.22 | 3.25 | 3.27 | 3.75 | 4.19 | 4.44 |
| LOC102724428 | 4    | 3.4  | 3.59 | 4.41 | 3.12 | 3.75 | 2.95 | 4.51 |
| GCH1         | 3.26 | 3.96 | 3.86 | 4.09 | 3.52 | 3.75 | 4.21 | 4.59 |
| ELF2         | 4.01 | 3.87 | 4.64 | 4.77 | 4.43 | 3.75 | 5.65 | 5.62 |
| CFAP97       | 3.41 | 4.13 | 4.29 | 4.9  | 4.42 | 3.75 | 7.94 | 6.79 |
| ZSCAN2       | 3.51 | 3.71 | 3.79 | 3.54 | 3.85 | 3.76 | 3.19 | 3.37 |
| OR51B5       | 3.65 | 3.45 | 4.3  | 4.77 | 4.16 | 3.76 | 3.89 | 3.38 |
| ZNF488       | 3.23 | 3.23 | 3.05 | 2.76 | 3.76 | 3.76 | 3.45 | 3.45 |
| NAAA         | 3.86 | 4.23 | 3.85 | 3.97 | 3.96 | 3.76 | 4.3  | 4.16 |
| FNBP1        | 3.9  | 3.84 | 4.14 | 4.33 | 3.92 | 3.76 | 4.26 | 4.31 |
| PIGL         | 4.29 | 3.25 | 3.87 | 4.03 | 3.51 | 3.76 | 5.15 | 4.9  |
| SLC25A4      | 3.85 | 3.89 | 3.71 | 3.35 | 3.79 | 3.77 | 3.15 | 3.18 |
| NCOA1        | 3.35 | 2.95 | 3.72 | 4.53 | 3.37 | 3.77 | 4.32 | 4.28 |
| THSD1        | 2.89 | 3.3  | 3.45 | 3.72 | 3.94 | 3.78 | 4.36 | 3.34 |
| BRPF3        | 3.76 | 3.61 | 4.56 | 4.06 | 3.75 | 3.78 | 3.46 | 3.44 |
| HIC2         | 3.67 | 3.89 | 3.88 | 3.69 | 3.72 | 3.78 | 3.34 | 3.64 |
| MARK1        | 3.15 | 3.45 | 3.46 | 3.98 | 3.51 | 3.78 | 4.21 | 3.97 |
| SPINT1       | 2.81 | 3.63 | 3.29 | 3.51 | 4.65 | 3.78 | 3.97 | 4.04 |
| STON2        | 2.96 | 2.85 | 3.84 | 5.06 | 4.15 | 3.78 | 5.57 | 5.47 |
| TLR4         | 2.77 | 2.61 | 3.43 | 4.21 | 4.37 | 3.78 | 6.89 | 5.98 |
| LGALS7       | 4.92 | 2.44 | 3.52 | 3.65 | 2.96 | 3.79 | 2.84 | 2.41 |
| SPERT        | 4.69 | 5.25 | 4.89 | 4.37 | 3.82 | 3.79 | 3.01 | 2.89 |
| SHANK3       | 3.42 | 3.13 | 3.63 | 3.25 | 3.76 | 3.79 | 3.15 | 3.52 |
| CSRNP2       | 3.76 | 3.47 | 3.23 | 3.62 | 3.79 | 3.79 | 3.31 | 3.6  |
| ATP7B        | 3.35 | 3.43 | 3.56 | 3.68 | 3.74 | 3.79 | 4.1  | 4.22 |
| CLEC18A      | 4.2  | 6.54 | 4.23 | 4.45 | 4.94 | 3.79 | 3.21 | 4.23 |
| BRMS1L       | 2.99 | 2.83 | 3.84 | 3.85 | 4.24 | 3.79 | 6.15 | 4.59 |
| MB21D1       | 3.81 | 3.64 | 3.81 | 3.75 | 4.24 | 3.79 | 4.82 | 4.92 |
| MTF1         | 4.3  | 4.09 | 4.25 | 4.52 | 4.39 | 3.79 | 5.2  | 4.95 |
| LOC107985082 | 4.49 | 4.23 | 4.7  | 5.37 | 4.71 | 3.79 | 6.08 | 5.43 |
| BBIP1        | 3.46 | 4.15 | 3.54 | 4.3  | 4.03 | 3.79 | 5.59 | 5.63 |
| LOC107987428 | 3.72 | 3.15 | 3.27 | 2.81 | 3.89 | 3.8  | 2.71 | 2.97 |
| RDM1         | 4.17 | 4.18 | 3.05 | 3.21 | 4.55 | 3.8  | 3.77 | 3.76 |
| RAB36        | 3.47 | 4.29 | 3.89 | 3.45 | 3.37 | 3.8  | 3.64 | 4.04 |
| RTN4IP1      | 3.7  | 3.84 | 4.45 | 3.72 | 4.46 | 3.8  | 4.1  | 4.17 |
| RAB21        | 3.26 | 3.12 | 3.86 | 3.83 | 4.09 | 3.8  | 5.69 | 5.08 |
| RALGAPA1     | 2.98 | 2.66 | 3.54 | 4.29 | 4.01 | 3.8  | 6.24 | 5.39 |
| FAS          | 3.02 | 3.1  | 3.67 | 4.3  | 3.51 | 3.8  | 6.62 | 5.54 |
| RLF          | 4.17 | 3.99 | 4.77 | 5.81 | 3.83 | 3.8  | 7.03 | 6.18 |
| APH1B        | 3.92 | 3.94 | 3.95 | 3.81 | 3.23 | 3.81 | 4.05 | 3.46 |
| PEX3         | 3.31 | 3.23 | 3.67 | 3.67 | 2.93 | 3.81 | 4.54 | 3.57 |
| MLKL         | 2.99 | 3.35 | 3.2  | 3.38 | 3.55 | 3.81 | 4.55 | 3.92 |
| PDE4DIP      | 3.63 | 3.58 | 3.78 | 3.99 | 3.8  | 3.81 | 3.68 | 4.07 |
| HNRNPA1L2    | 3.58 | 4.17 | 4.53 | 4.81 | 4.02 | 3.81 | 6.22 | 4.17 |
| GPATCH11     | 2.64 | 2.48 | 3.44 | 3.78 | 4.08 | 3.81 | 6.33 | 4.74 |
| CSGALNACT2   | 3.44 | 3.36 | 3.64 | 5.23 | 3.54 | 3.81 | 6.35 | 4.74 |
| TNIK         | 3.64 | 3.46 | 4.04 | 4.63 | 3.91 | 3.81 | 5.1  | 4.85 |
| AASS         | 3.03 | 3.02 | 3.41 | 4.43 | 4.05 | 3.81 | 6.17 | 5.86 |
| C10orf88     | 2.96 | 2.92 | 3.11 | 3.86 | 3.62 | 3.82 | 4.35 | 3.92 |
| THAP1        | 2.76 | 2.55 | 2.83 | 3.44 | 3.34 | 3.82 | 4.72 | 3.94 |
| PTS          | 4.22 | 3.43 | 2.85 | 3.34 | 4.35 | 3.82 | 6.62 | 4.49 |
| DOCK9        | 3.67 | 3.15 | 4.13 | 4.59 | 3.51 | 3.82 | 5.08 | 4.84 |
| EDRF1        | 3.59 | 2.92 | 4.15 | 4.32 | 3.79 | 3.82 | 5.93 | 5.13 |
| ATP6V1E2     | 3.47 | 3.41 | 3.3  | 3.47 | 3.26 | 3.83 | 4.02 | 3.55 |
| GNAZ         | 3.89 | 3.62 | 3.7  | 3.38 | 3.74 | 3.83 | 3.31 | 3.56 |
| CSNK1G1      | 3.44 | 3.5  | 3.92 | 3.61 | 4.09 | 3.83 | 4.46 | 4.29 |
| TMEM192      | 3.2  | 3.14 | 3.5  | 3.8  | 4.13 | 3.83 | 4.83 | 4.48 |
| RBM48        | 3.91 | 3.86 | 4.04 | 4.31 | 5.27 | 3.83 | 6.28 | 4.51 |
| NANP         | 3.17 | 3.3  | 3.9  | 3.93 | 3.91 | 3.83 | 5.4  | 4.52 |
| FMNL3        | 4.28 | 4.68 | 4.29 | 4.33 | 3.9  | 3.84 | 4.08 | 4.14 |
| USP30        | 4.41 | 4.4  | 4.52 | 3.91 | 4.34 | 3.84 | 4.92 | 4.31 |

|              |      |      |      |      |      |      |      |      |
|--------------|------|------|------|------|------|------|------|------|
| ANKRD13C     | 3.63 | 3.3  | 3.87 | 4.08 | 4.1  | 3.84 | 5.78 | 4.68 |
| SLC25A51     | 2.7  | 3.86 | 3.71 | 3.38 | 4.17 | 3.84 | 4.68 | 4.77 |
| PRELID2      | 5.01 | 5.41 | 6.26 | 5.24 | 4.3  | 3.84 | 4.88 | 4.9  |
| ING3         | 3.91 | 3.81 | 3.91 | 3.77 | 4.08 | 3.84 | 6.46 | 5.42 |
| KIAA0586     | 3.14 | 2.76 | 3.58 | 4.76 | 4.1  | 3.84 | 6.5  | 5.44 |
| OTUD4        | 3.18 | 2.63 | 3.79 | 4.8  | 3.8  | 3.84 | 6.99 | 5.82 |
| PTPRJ        | 3.61 | 3.46 | 3.23 | 3.77 | 3.28 | 3.85 | 3.54 | 3.69 |
| C1orf56      | 4.29 | 4.93 | 4.97 | 4.8  | 4.03 | 3.85 | 3.81 | 3.74 |
| SIX1         | 3.95 | 4.1  | 4.54 | 4.47 | 3.69 | 3.85 | 3.34 | 3.8  |
| UST          | 3.49 | 3.59 | 3.55 | 3.98 | 3.32 | 3.85 | 3.77 | 3.82 |
| SLC6A9       | 3.85 | 3.94 | 3.23 | 2.92 | 3.51 | 3.85 | 3.44 | 4.1  |
| VPS54        | 3.67 | 3.39 | 3.97 | 4.59 | 3.48 | 3.85 | 6.44 | 5.35 |
| LYRM7        | 2.74 | 2.52 | 3.3  | 4.27 | 3.41 | 3.85 | 7.36 | 5.45 |
| SCML1        | 2.83 | 2.96 | 3.57 | 3.58 | 3.83 | 3.85 | 6.77 | 5.47 |
| ZNF737       | 3.66 | 3.62 | 4.18 | 5.03 | 3.74 | 3.85 | 6.12 | 5.74 |
| GSDMB        | 4.13 | 4.63 | 4.85 | 6.05 | 3.6  | 3.85 | 6.11 | 5.97 |
| PTAFR        | 3.8  | 3.44 | 3.38 | 3.91 | 4.04 | 3.86 | 3.49 | 3.75 |
| TMEM25       | 5.08 | 4.9  | 5.62 | 4.91 | 3.56 | 3.86 | 3.4  | 3.87 |
| RFFL         | 4.2  | 4.29 | 4.65 | 4.98 | 4.01 | 3.86 | 4.77 | 4.75 |
| NUDT6        | 4.09 | 2.78 | 3.45 | 3.16 | 3.15 | 3.87 | 4.17 | 2.55 |
| ADAMTS7      | 3.43 | 3.39 | 3.16 | 3.4  | 3.54 | 3.87 | 2.9  | 3.15 |
| RAP1GAP2     | 3.28 | 3.62 | 3.8  | 3.42 | 4.02 | 3.87 | 3.47 | 3.28 |
| PKNOX1       | 4.67 | 3.94 | 4.62 | 4.61 | 4.26 | 3.87 | 4.34 | 3.96 |
| BTRC         | 3.72 | 4.15 | 4.01 | 4.19 | 4.01 | 3.87 | 4.97 | 4.21 |
| ATL3         | 3.66 | 3.91 | 4.06 | 4.43 | 4.14 | 3.87 | 4.63 | 4.46 |
| CD3EAP       | 2.84 | 2.93 | 2.96 | 3.27 | 4.17 | 3.87 | 3.41 | 4.49 |
| LRR1         | 4.66 | 3.63 | 4.13 | 4.28 | 4.64 | 3.87 | 4.65 | 4.82 |
| PTPRZ1       | 3.38 | 3.33 | 3.79 | 4.58 | 3.26 | 3.87 | 4.46 | 4.93 |
| ANKRD49      | 3.26 | 4.16 | 4.44 | 4.48 | 3.63 | 3.87 | 5.87 | 5.03 |
| ZHX1         | 3.26 | 3.07 | 3.5  | 4.28 | 3.92 | 3.87 | 6.46 | 5.44 |
| ZNF43        | 3.07 | 3.22 | 3.45 | 4.56 | 3.62 | 3.87 | 5.56 | 5.53 |
| SMAD7        | 3.58 | 3.64 | 3.48 | 3.42 | 4.27 | 3.88 | 3.54 | 4.12 |
| OSBPL7       | 3.01 | 3.14 | 3.36 | 4.18 | 3.56 | 3.88 | 4.29 | 4.18 |
| PAMR1        | 2.95 | 3.12 | 3.27 | 3.34 | 4.71 | 3.88 | 3.72 | 4.32 |
| UVSSA        | 3.59 | 3.05 | 3.36 | 4.58 | 3.12 | 3.88 | 5.27 | 4.55 |
| SCRN3        | 3.32 | 3.38 | 3.89 | 4.79 | 4.24 | 3.88 | 6.09 | 5.21 |
| SKA3         | 3.92 | 3.5  | 4.41 | 4.36 | 4.35 | 3.88 | 6.42 | 5.24 |
| ZNF486       | 3.44 | 3.53 | 3.69 | 4.92 | 4.03 | 3.88 | 6.39 | 5.37 |
| PAQR8        | 3.76 | 3.97 | 3.8  | 4.08 | 3.8  | 3.89 | 3.95 | 3.95 |
| MAP7         | 3.8  | 3.46 | 3.74 | 3.57 | 4.58 | 3.89 | 4.19 | 4.02 |
| SCAMP5       | 4.91 | 4.17 | 4.4  | 4.21 | 4.62 | 3.89 | 4.02 | 4.87 |
| ERI2         | 3.37 | 2.76 | 3.17 | 4.33 | 3.92 | 3.89 | 6.23 | 5.4  |
| NOS1         | 3.29 | 3.49 | 3.27 | 3.48 | 3.86 | 3.9  | 4.01 | 3.83 |
| PDK1         | 5.38 | 4.35 | 5.1  | 5.09 | 3.36 | 3.9  | 5.99 | 4.08 |
| LYSMD1       | 3.72 | 3.64 | 4.12 | 4    | 4.45 | 3.9  | 4.69 | 4.42 |
| LOC100996763 | 3.76 | 3.39 | 2.85 | 3.59 | 3.31 | 3.9  | 4.93 | 4.57 |
| PPP1R3B      | 4.63 | 3.89 | 4.17 | 4.91 | 4.28 | 3.9  | 5.1  | 4.9  |
| RMI1         | 4.57 | 3.67 | 4.45 | 5.22 | 4.01 | 3.9  | 7.45 | 5.98 |
| NATD1        | 3.9  | 3.77 | 3.65 | 3.55 | 3.49 | 3.91 | 3.27 | 3.76 |
| SLC35D1      | 2.99 | 2.7  | 3.15 | 3.76 | 3.94 | 3.91 | 4.7  | 4.17 |
| DPH3         | 3.32 | 3.15 | 3.57 | 3.79 | 4.17 | 3.91 | 5.87 | 4.91 |
| NECTIN3      | 4.04 | 3.78 | 5.07 | 4.88 | 3.78 | 3.91 | 5.86 | 5.19 |
| ATXN7L1      | 4.15 | 3.38 | 4.57 | 4.53 | 3.86 | 3.91 | 5.05 | 5.21 |
| ZNF248       | 3.38 | 3.31 | 3.85 | 4.88 | 3.94 | 3.91 | 5.67 | 6.23 |
| SLX4         | 3.53 | 3.52 | 3.52 | 3.56 | 3.75 | 3.92 | 3.37 | 3.39 |
| CCDC134      | 3.35 | 4.02 | 3.95 | 4.22 | 3.9  | 3.92 | 3.85 | 3.91 |
| SH3RF1       | 3.98 | 3.91 | 3.94 | 4.32 | 3.83 | 3.92 | 4.55 | 4.31 |
| PPARGC1B     | 3.98 | 3.12 | 3.75 | 3.95 | 4.46 | 3.92 | 4.09 | 4.47 |
| KLHL42       | 3.75 | 3.21 | 4.07 | 4.51 | 3.98 | 3.92 | 5.06 | 4.62 |
| EFNA5        | 4.15 | 3.69 | 4.18 | 4.45 | 3.92 | 3.92 | 4.06 | 4.65 |
| GABRE        | 2.89 | 2.91 | 3.27 | 4.16 | 3.59 | 3.92 | 5.75 | 5.29 |
| NHS          | 3.92 | 3.06 | 4.2  | 5.3  | 3.47 | 3.92 | 6.47 | 5.63 |
| BBS10        | 3.79 | 3.69 | 4.34 | 4.78 | 3.6  | 3.92 | 6.25 | 5.77 |
| ZFP62        | 4.13 | 3.86 | 5.06 | 6.3  | 3.99 | 3.92 | 7.64 | 5.98 |
| ZNF658       | 3.71 | 3.39 | 4.04 | 5.56 | 4.06 | 3.92 | 6.98 | 6.11 |
| PANX2        | 4.1  | 3.9  | 4.13 | 3.7  | 3.4  | 3.93 | 2.6  | 3.18 |
| PTCHD4       | 4.46 | 4.38 | 4.51 | 4.62 | 4.25 | 3.93 | 4.71 | 4.67 |
| FAM160B1     | 3.3  | 3.19 | 3.65 | 4.57 | 4.3  | 3.93 | 5.66 | 5.26 |
| ADAMTSL4     | 3.67 | 3.92 | 3.76 | 4.3  | 2.86 | 3.94 | 2.98 | 3.36 |
| PASK         | 3.76 | 3.34 | 3.41 | 3.95 | 3.01 | 3.94 | 4.14 | 3.72 |
| ZSCAN32      | 4.06 | 3.93 | 3.76 | 4.46 | 4.24 | 3.94 | 4.61 | 4.65 |
| PDE7B        | 3.19 | 2.71 | 3.22 | 3.8  | 4.03 | 3.94 | 4.83 | 4.8  |
| SERPINI1     | 4.31 | 4.1  | 4.04 | 4.91 | 3.1  | 3.94 | 5.61 | 5.06 |
| LRP6         | 3.73 | 3.25 | 3.79 | 4.86 | 3.92 | 3.94 | 5.81 | 5.29 |
| NBPF11       | 3.2  | 3.16 | 3.52 | 3.65 | 3.72 | 3.94 | 5.29 | 5.33 |
| PTPRS        | 5.09 | 5.04 | 4.9  | 4.76 | 3.39 | 3.95 | 2.94 | 3.22 |
| AZIN2        | 4.26 | 4.2  | 4.32 | 4.1  | 3.61 | 3.95 | 3.57 | 3.8  |
| GAL3ST4      | 4.06 | 4.02 | 3.75 | 4.14 | 3.99 | 3.95 | 3.92 | 3.91 |
| ARHGAP18     | 3.23 | 2.75 | 4.02 | 4.62 | 3.92 | 3.95 | 6.27 | 5.02 |
| ETFDH        | 3.6  | 3.52 | 3.63 | 3.67 | 4.98 | 3.95 | 6.56 | 5.2  |
| ZNF92        | 4.73 | 4.93 | 5    | 5.6  | 4.1  | 3.95 | 6.18 | 5.53 |
| GABBR1       | 3.11 | 2.92 | 3.11 | 4.15 | 3.53 | 3.95 | 6.23 | 5.95 |

|           |      |      |      |      |      |      |      |      |
|-----------|------|------|------|------|------|------|------|------|
| MT1E      | 3.66 | 3.59 | 2.93 | 2.85 | 1.82 | 3.96 | 1.35 | 2.72 |
| MMP28     | 2.55 | 3.2  | 3.15 | 2.49 | 3.78 | 3.96 | 3.26 | 3.39 |
| HINFP     | 4.24 | 3.93 | 4.43 | 4.24 | 4.52 | 3.96 | 4.34 | 4.07 |
| SLC16A13  | 4.46 | 4.14 | 3.91 | 3.97 | 4.18 | 3.96 | 3.1  | 4.52 |
| COX18     | 3.44 | 3.65 | 3.73 | 4.37 | 4.48 | 3.96 | 4.99 | 4.55 |
| ZFYVE26   | 3.93 | 3.83 | 4.15 | 4.39 | 4.37 | 3.96 | 4.77 | 5.12 |
| SETD7     | 3.06 | 3.03 | 3.59 | 4.42 | 4.06 | 3.96 | 5.75 | 5.21 |
| ZNF341    | 2.84 | 2.47 | 2.57 | 2.24 | 3.96 | 3.97 | 3.35 | 3.47 |
| MEIS2     | 4.04 | 3.98 | 4.1  | 5.16 | 3.32 | 3.97 | 4.49 | 4.05 |
| SMIM14    | 3.33 | 3.41 | 3.34 | 4.06 | 3.77 | 3.97 | 4.6  | 4.48 |
| CEP164    | 3.91 | 3.75 | 3.72 | 4.28 | 4.4  | 3.97 | 4.18 | 4.51 |
| KATNBL1   | 4    | 3.55 | 4.67 | 4.64 | 3.78 | 3.97 | 5.92 | 4.88 |
| RAP2A     | 3.57 | 3.64 | 3.66 | 4.51 | 4.01 | 3.97 | 5.48 | 5.16 |
| DPY19L3   | 3.39 | 2.89 | 3.74 | 4.4  | 3.86 | 3.97 | 6.5  | 5.17 |
| MOSPD1    | 3.72 | 3.49 | 4.29 | 3.83 | 4.6  | 3.97 | 6.74 | 5.23 |
| STX17     | 3.61 | 3.13 | 4.04 | 4.91 | 3.9  | 3.97 | 5.98 | 5.36 |
| FMO4      | 4.12 | 3.33 | 4.4  | 4.29 | 4.03 | 3.97 | 6.61 | 5.62 |
| ZNF846    | 3.78 | 3.81 | 4.39 | 5.62 | 4.59 | 3.97 | 5.63 | 5.96 |
| KIAA1324  | 3.62 | 4.96 | 3.42 | 3.92 | 3.35 | 3.98 | 2.66 | 4.13 |
| CCDC112   | 3.46 | 3.63 | 3.95 | 4.26 | 4.34 | 3.98 | 6.01 | 5.16 |
| BNIP2     | 3.43 | 3.56 | 3.92 | 4.5  | 4.24 | 3.98 | 6.85 | 6    |
| LY96      | 3.96 | 3.63 | 3.3  | 2.48 | 4.6  | 3.99 | 5.12 | 4.03 |
| IRAK4     | 3.33 | 3.33 | 3.68 | 4.51 | 3.77 | 3.99 | 5.94 | 4.78 |
| R3HCC1L   | 3.71 | 3.06 | 3.68 | 4.08 | 3.67 | 3.99 | 5.96 | 5.49 |
| ZNF300    | 3.64 | 3.21 | 4.07 | 5.28 | 4.43 | 3.99 | 7.96 | 6.4  |
| RICTOR    | 3.5  | 3.47 | 4.09 | 4.82 | 4.32 | 3.99 | 7.88 | 6.69 |
| VASN      | 6.24 | 6.64 | 5.96 | 5.79 | 3.91 | 4    | 2.68 | 2.88 |
| USP13     | 3.51 | 2.85 | 3.23 | 3.9  | 3.27 | 4    | 3.76 | 3.62 |
| MOK       | 4.14 | 3.87 | 3.37 | 4.04 | 4.22 | 4    | 4.72 | 4.02 |
| ZNF473    | 3.83 | 3.82 | 4.32 | 4.48 | 3.97 | 4    | 4.31 | 4.11 |
| ITPRIP    | 3.75 | 4.05 | 3.68 | 4.2  | 4.16 | 4    | 3.96 | 4.21 |
| SH3D21    | 5.07 | 5.21 | 4.9  | 5.99 | 3.81 | 4    | 5.78 | 4.24 |
| FRMD4A    | 4.26 | 3.8  | 3.9  | 4.46 | 4.22 | 4    | 4.54 | 4.53 |
| LIN7C     | 2.53 | 2.98 | 3.06 | 3.96 | 4.08 | 4    | 6.3  | 5.44 |
| RAB11FIP4 | 4.1  | 4.14 | 4.2  | 4.22 | 3.98 | 4.01 | 3.93 | 4.21 |
| ZRSR2     | 3.69 | 3.38 | 4.47 | 4.38 | 4.29 | 4.01 | 4.79 | 4.8  |
| LYSMD3    | 3.83 | 3.31 | 3.55 | 4.2  | 3.87 | 4.01 | 6.51 | 5.8  |
| IL17RA    | 4.03 | 3.77 | 3.84 | 4.2  | 3.52 | 4.02 | 3.48 | 3.74 |
| FIG4      | 3.47 | 2.97 | 3.61 | 3.64 | 4.35 | 4.02 | 5.15 | 4.73 |
| MTF2      | 4.53 | 3.86 | 5.09 | 5.88 | 4.5  | 4.02 | 6.72 | 5.45 |
| ASB16     | 3.76 | 3.2  | 3.55 | 3.77 | 3.52 | 4.03 | 3.8  | 3.48 |
| UBA7      | 6.57 | 6.83 | 5.93 | 5.53 | 4.48 | 4.03 | 3.78 | 3.59 |
| APAF1     | 3.47 | 2.99 | 3.42 | 4.73 | 3.74 | 4.03 | 5.64 | 4.76 |
| KIF20B    | 3.42 | 2.91 | 3.61 | 3.33 | 4.43 | 4.03 | 6.68 | 5.77 |
| DNAJB5    | 3.8  | 3.99 | 3.63 | 3.36 | 3.64 | 4.04 | 3.09 | 3.35 |
| RAD18     | 3.41 | 2.6  | 3.95 | 3.77 | 3.57 | 4.04 | 5.12 | 4.53 |
| LIMCH1    | 4.83 | 4.17 | 5.17 | 5.51 | 4.77 | 4.04 | 5.75 | 4.92 |
| GPATCH2   | 3.51 | 3.75 | 4.16 | 4.59 | 3.83 | 4.04 | 5.69 | 5.61 |
| SPIN2B    | 3.74 | 3.74 | 3.3  | 4.33 | 4.18 | 4.05 | 4.35 | 4.32 |
| BEX2      | 3.21 | 2.38 | 2.45 | 3.17 | 3.32 | 4.05 | 3.76 | 4.49 |
| TPM2      | 4.28 | 3.3  | 3.74 | 4.28 | 3.36 | 4.05 | 5.06 | 4.71 |
| CHD7      | 3.76 | 3.5  | 4.21 | 4.5  | 3.7  | 4.05 | 4.96 | 4.95 |
| RAB3B     | 4.37 | 4.23 | 4.94 | 5.57 | 4.57 | 4.05 | 5.19 | 4.98 |
| YAF2      | 4.62 | 3.01 | 3.95 | 4.31 | 4.17 | 4.05 | 5.35 | 5.03 |
| CBL       | 4.22 | 3.77 | 4.34 | 4.54 | 4.1  | 4.05 | 4.6  | 5.13 |
| ZNF562    | 3.63 | 3.53 | 3.88 | 4.47 | 4.21 | 4.05 | 5.72 | 5.22 |
| TBC1D23   | 3.97 | 4.02 | 4.31 | 5.49 | 4.47 | 4.05 | 7.95 | 6    |
| CARNMT1   | 3.36 | 3.44 | 4.11 | 5.31 | 5.18 | 4.05 | 8.6  | 6.77 |
| THAP8     | 5.08 | 4.55 | 4.03 | 3.86 | 4.1  | 4.06 | 3.71 | 3.79 |
| SUPT3H    | 3.25 | 3.62 | 3.06 | 3.73 | 4.58 | 4.06 | 5.17 | 4.58 |
| CNTRL     | 3.18 | 3.4  | 4.2  | 4.99 | 3.7  | 4.06 | 7.83 | 6.57 |
| FAM110C   | 3.97 | 3.6  | 3.43 | 4.14 | 4.54 | 4.07 | 4.04 | 3.58 |
| VRK2      | 4.87 | 3.88 | 4.86 | 5.26 | 4.25 | 4.07 | 6.65 | 5.65 |
| ZNF302    | 4.45 | 3.27 | 5.22 | 5.46 | 4    | 4.07 | 8.76 | 5.84 |
| ZNRF3     | 4.13 | 4.08 | 4.04 | 4.05 | 3.9  | 4.08 | 3.63 | 3.51 |
| WDR62     | 4    | 3.38 | 3.33 | 3.8  | 4.57 | 4.08 | 3.72 | 3.64 |
| SYNGR3    | 3.77 | 3.99 | 3.09 | 3.47 | 4.05 | 4.08 | 2.88 | 3.82 |
| EYA4      | 3.53 | 3.44 | 4.24 | 4.55 | 4.06 | 4.08 | 6.56 | 5.08 |
| PLPPR1    | 3.63 | 3.61 | 3.95 | 4.83 | 3.69 | 4.08 | 4.83 | 5.2  |
| MED31     | 3.85 | 4.71 | 3.93 | 4.03 | 4.94 | 4.09 | 3.8  | 3.41 |
| C2CD2     | 4.14 | 2.95 | 3.33 | 3.44 | 3.44 | 4.09 | 3.95 | 3.6  |
| ZNF497    | 3.65 | 3.73 | 3.34 | 3.13 | 3.99 | 4.09 | 3.3  | 3.61 |
| LYN       | 3.07 | 3.38 | 3.33 | 3.68 | 3.84 | 4.09 | 4.78 | 3.86 |
| NKIRAS1   | 3.3  | 2.89 | 3.23 | 3.8  | 3.83 | 4.09 | 5.63 | 4.41 |
| GIPR      | 3.06 | 2.79 | 3.84 | 3.54 | 3.81 | 4.1  | 5.36 | 4.49 |
| LOC730268 | 3.62 | 3.6  | 2.94 | 2.83 | 4.02 | 4.1  | 3.87 | 4.51 |
| SAGE1     | 4.12 | 3.25 | 3.46 | 4.11 | 4.72 | 4.1  | 6.91 | 5.23 |
| DTNA      | 3.65 | 3.84 | 4.28 | 4.7  | 4.75 | 4.1  | 6.06 | 5.74 |
| RNFT1     | 3.9  | 3.84 | 3.86 | 4.14 | 4.49 | 4.1  | 5.95 | 5.93 |
| CTIF      | 3.68 | 4.17 | 4.27 | 3.74 | 4.11 | 4.11 | 3.51 | 3.73 |
| EVL       | 4.4  | 4.67 | 4.76 | 4.5  | 4.3  | 4.11 | 3.51 | 4.09 |
| FAM210A   | 3.77 | 3.4  | 3.47 | 3.91 | 4.41 | 4.11 | 5.33 | 4.41 |
| PTGER4    | 4.31 | 3.99 | 4.24 | 4.37 | 3.73 | 4.11 | 4.21 | 4.51 |
| SMAD4     | 3.94 | 3.71 | 4.28 | 4.38 | 4.47 | 4.11 | 5.06 | 4.57 |
| DEPDC1    | 2.56 | 2.65 | 2.79 | 3.13 | 4.12 | 4.11 | 7.17 | 5.6  |
| KDM6A     | 4.65 | 4.22 | 4.85 | 4.88 | 4.52 | 4.11 | 5.86 | 6.1  |

|          |      |      |      |      |      |      |      |      |
|----------|------|------|------|------|------|------|------|------|
| DNAAF2   | 3.83 | 3.93 | 3.78 | 4.19 | 4.56 | 4.12 | 5.34 | 5.03 |
| MTRF1    | 2.22 | 2.82 | 2.97 | 3.83 | 4.52 | 4.12 | 8.02 | 5.27 |
| ZNF397   | 4.92 | 3.99 | 4.65 | 5.56 | 4.51 | 4.12 | 6.84 | 5.43 |
| ZC2HC1A  | 3.52 | 3.38 | 3.7  | 5    | 4.3  | 4.12 | 5.49 | 5.44 |
| PRPF39   | 3.75 | 3.54 | 3.77 | 4.77 | 4.36 | 4.12 | 8.15 | 5.77 |
| SNX29    | 3.48 | 3.79 | 3.36 | 3.72 | 3.96 | 4.13 | 3.31 | 3.94 |
| FAM101B  | 3.73 | 4.17 | 4.02 | 3.91 | 4.31 | 4.13 | 3.77 | 4.01 |
| PTP4A3   | 5.03 | 5.98 | 4.8  | 5.05 | 4.14 | 4.13 | 3.54 | 4.06 |
| PAX9     | 4.02 | 4.55 | 3.99 | 4.46 | 4.06 | 4.13 | 3.55 | 4.06 |
| PASD1    | 5.05 | 4.82 | 4.97 | 4.62 | 3.98 | 4.13 | 4.12 | 4.19 |
| EME2     | 3.22 | 3.15 | 2.84 | 3.67 | 4.31 | 4.13 | 4.22 | 4.21 |
| PTPN3    | 4.52 | 4.26 | 4.57 | 5.05 | 4.65 | 4.13 | 5    | 4.75 |
| ERCC8    | 4.05 | 3.98 | 3.81 | 4.73 | 4.72 | 4.13 | 5.52 | 5.39 |
| ARSK     | 3.92 | 4    | 4.35 | 5.15 | 4.43 | 4.13 | 5.99 | 5.45 |
| RIOK2    | 5.97 | 5.46 | 6.36 | 5.71 | 4.74 | 4.13 | 6.77 | 6.16 |
| SYT1     | 3.87 | 3.62 | 4.25 | 4.92 | 4.21 | 4.13 | 6.14 | 6.33 |
| FAM72C   | 3.39 | 3.22 | 2.18 | 3.55 | 3.84 | 4.14 | 5.39 | 2.62 |
| SPATA5L1 | 4.32 | 3.76 | 3.92 | 3.5  | 4.47 | 4.14 | 4.45 | 4.22 |
| AP1S3    | 3.64 | 3.31 | 3.75 | 4.23 | 3.95 | 4.14 | 5.93 | 5.26 |
| NUDT12   | 4.31 | 4.59 | 4.1  | 4.84 | 4.37 | 4.14 | 6.93 | 5.68 |
| PHC3     | 4    | 3.21 | 4.6  | 6.71 | 4.39 | 4.14 | 7.71 | 6.48 |
| IQCC     | 4.59 | 4.42 | 3.87 | 3.76 | 3.01 | 4.15 | 3.99 | 4.21 |
| RYBP     | 3.97 | 4.12 | 4.86 | 5.51 | 4.21 | 4.15 | 6.1  | 5.38 |
| MRE11A   | 3.43 | 3.24 | 4.4  | 4.69 | 4.22 | 4.15 | 7.51 | 5.89 |
| KBTBD7   | 4.23 | 4.35 | 4.6  | 4.63 | 4.88 | 4.16 | 4.68 | 4.47 |
| CCNO     | 5.08 | 3.99 | 4.65 | 4.45 | 3.88 | 4.16 | 3.16 | 4.92 |
| SAMD9    | 7.17 | 7.64 | 8.2  | 8.45 | 4.11 | 4.16 | 7.2  | 5.79 |
| UNKL     | 3.92 | 3.87 | 3.71 | 4.03 | 4.22 | 4.17 | 4.21 | 3.8  |
| CHGB     | 4.29 | 3.81 | 4.15 | 4.67 | 4.02 | 4.17 | 3.71 | 3.86 |
| ZNF862   | 4.73 | 4.52 | 4.61 | 5.09 | 4.25 | 4.17 | 4.81 | 4.57 |
| SHOX2    | 4.76 | 4.41 | 4.38 | 5.51 | 4.18 | 4.17 | 4.72 | 4.68 |
| RP2      | 3.1  | 3.13 | 4.4  | 4.6  | 4.4  | 4.17 | 6.77 | 6.14 |
| ATP2B1   | 4.21 | 4.16 | 5.24 | 5.91 | 4.81 | 4.17 | 7.84 | 7.02 |
| KLF13    | 3.49 | 3.75 | 3.39 | 3.69 | 4.44 | 4.18 | 4.12 | 3.92 |
| B3GNT3   | 3.96 | 4.89 | 4.19 | 4.84 | 4.08 | 4.18 | 3.82 | 4.19 |
| SLC35A3  | 3.76 | 3.31 | 4.2  | 4.43 | 3.48 | 4.18 | 6.91 | 5.26 |
| LIN52    | 3.8  | 4.19 | 3.71 | 5.48 | 4.86 | 4.18 | 5.74 | 5.44 |
| UBE2W    | 4.42 | 4.19 | 3.89 | 5.11 | 4.55 | 4.18 | 6.14 | 5.57 |
| NEK11    | 4.03 | 4.27 | 4.39 | 4.67 | 3.71 | 4.18 | 6.97 | 6.5  |
| TICRR    | 3.69 | 3.46 | 3.65 | 3.88 | 3.54 | 4.19 | 4.16 | 3.76 |
| PRKCA    | 4.49 | 3.72 | 3.64 | 3.93 | 3.81 | 4.19 | 4.4  | 4.24 |
| EDA2R    | 2.52 | 2.58 | 2.51 | 3.67 | 4.37 | 4.19 | 5.77 | 4.64 |
| SPDYE16  | 2.48 | 3.34 | 3.59 | 4.06 | 4.24 | 4.19 | 4.67 | 4.84 |
| TANC2    | 4.85 | 4.6  | 5.16 | 5.17 | 4.36 | 4.19 | 5    | 4.91 |
| FCHO2    | 3.18 | 3.23 | 3.58 | 4.79 | 4.51 | 4.19 | 6.23 | 5.58 |
| RFX3     | 4.35 | 4    | 4.82 | 5.64 | 5    | 4.19 | 6.99 | 6.39 |
| EVC      | 3.77 | 3.96 | 3.84 | 4.46 | 3.77 | 4.2  | 3.97 | 4.11 |
| LYSMD4   | 4.26 | 3.48 | 3.78 | 3.62 | 4.01 | 4.2  | 4.62 | 4.47 |
| KLRC2    | 3.62 | 4.65 | 5.17 | 4.48 | 4.24 | 4.2  | 5.21 | 4.58 |
| ABL2     | 4.41 | 3.93 | 4.39 | 4.63 | 4.22 | 4.2  | 5.16 | 4.75 |
| NCBP3    | 3.89 | 4.52 | 4.79 | 4.77 | 4.58 | 4.2  | 5.46 | 5.09 |
| LRRCC1   | 4.39 | 5.1  | 4.47 | 4.35 | 4.41 | 4.2  | 6.81 | 5.1  |
| RFX7     | 3.46 | 3.39 | 4.29 | 5.38 | 3.92 | 4.2  | 6.07 | 5.53 |
| SH2D4A   | 4.87 | 4.4  | 4.82 | 4.95 | 4.91 | 4.21 | 5.29 | 4.43 |
| JADE1    | 3.09 | 3.14 | 3.83 | 3.76 | 4.28 | 4.21 | 5.4  | 4.81 |
| SNX27    | 4.26 | 4.4  | 4.87 | 5.42 | 4.8  | 4.21 | 5.51 | 4.94 |
| ZNF12    | 4.35 | 4.24 | 4.93 | 5.45 | 4.11 | 4.21 | 7.26 | 5.89 |
| ZIC2     | 4.53 | 4.44 | 4.34 | 4.83 | 4.38 | 4.22 | 3.38 | 3.23 |
| CASP3    | 4.62 | 3.89 | 4.61 | 4.68 | 4.33 | 4.22 | 7.06 | 4.79 |
| FAXDC2   | 3.88 | 4    | 3.76 | 4.29 | 4.34 | 4.22 | 3.93 | 4.98 |
| CMTM1    | 4.64 | 3.74 | 4.17 | 6.14 | 3.93 | 4.22 | 4.06 | 5.15 |
| RHOJ     | 3.75 | 3.39 | 4.41 | 4.43 | 3.86 | 4.22 | 6.11 | 5.16 |
| KAT2B    | 3.58 | 2.97 | 3.84 | 4.01 | 3.99 | 4.22 | 5.82 | 5.35 |
| ADAM22   | 4.04 | 4.1  | 4.4  | 5.29 | 5.05 | 4.22 | 5.78 | 5.38 |
| SLC38A6  | 4.26 | 3.99 | 4.18 | 3.98 | 4.68 | 4.22 | 5.77 | 5.59 |
| TRIM23   | 4.1  | 3.39 | 4.4  | 4.89 | 4.3  | 4.22 | 7.77 | 6.15 |
| ANKRD12  | 3.34 | 3.81 | 4.2  | 4.44 | 4.1  | 4.22 | 6.82 | 6.42 |
| PIGZ     | 4.04 | 4.03 | 4.03 | 4.64 | 3.48 | 4.23 | 3.62 | 4.11 |
| HIST2H4A | 6.82 | 7.23 | 6.62 | 6.02 | 3.95 | 4.23 | 5.31 | 4.5  |
| HIST2H4B | 6.82 | 7.23 | 6.62 | 6.02 | 3.95 | 4.23 | 5.31 | 4.5  |
| CGRRF1   | 4.39 | 3.44 | 4.38 | 4.77 | 4.59 | 4.23 | 5.47 | 5.07 |
| PRICKLE4 | 4.36 | 4.9  | 4.36 | 5.74 | 4.35 | 4.23 | 5.12 | 5.28 |
| ATP11C   | 3.99 | 3.78 | 4.91 | 4.82 | 4.33 | 4.23 | 7.87 | 6.46 |
| ZNF789   | 5.67 | 4.88 | 5.26 | 6.88 | 4.85 | 4.23 | 6.03 | 6.79 |
| APOL1    | 4.72 | 4.85 | 4.57 | 4.8  | 3.7  | 4.24 | 3.51 | 3.68 |
| MST1     | 3.56 | 2.99 | 3.85 | 4.1  | 3.42 | 4.24 | 3.8  | 3.83 |
| MXRA8    | 3.25 | 3.1  | 3.41 | 3.11 | 3.29 | 4.24 | 4.37 | 3.91 |
| CDC37L1  | 3.55 | 3.77 | 3.87 | 4.45 | 4.41 | 4.24 | 5.78 | 5.53 |
| FAM72D   | 3.45 | 2.74 | 5.53 | 4.85 | 3.88 | 4.24 | 5.34 | 5.8  |
| C2CD5    | 4.21 | 3.67 | 4.57 | 5.6  | 4.62 | 4.24 | 7.55 | 6.68 |
| TLE6     | 4.78 | 4.66 | 4.07 | 4.01 | 3.62 | 4.25 | 3.29 | 3.67 |
| RSPH3    | 4.17 | 3.6  | 4.37 | 3.93 | 4.22 | 4.25 | 4.24 | 4.34 |
| TSPAN33  | 4.3  | 5.07 | 4.22 | 4.18 | 5.03 | 4.25 | 4.33 | 4.46 |
| ZNF587   | 4.09 | 3.85 | 4.44 | 5.06 | 4.14 | 4.25 | 6.13 | 5.98 |
| DGKQ     | 4.09 | 4.47 | 4    | 4.01 | 3.46 | 4.26 | 3.11 | 3.54 |
| TPCN2    | 3.77 | 3.55 | 3.73 | 3.75 | 4.15 | 4.26 | 3.93 | 4.39 |
| CPA4     | 3.71 | 3.9  | 4.31 | 4.61 | 4.67 | 4.26 | 5.25 | 4.59 |
| CGNL1    | 4.64 | 5.14 | 5.14 | 5.2  | 4.05 | 4.26 | 4.63 | 4.89 |
| KIAA1804 | 3.12 | 3.33 | 3.85 | 4.49 | 4.08 | 4.26 | 5.08 | 4.92 |

|              |      |      |      |      |      |      |      |      |
|--------------|------|------|------|------|------|------|------|------|
| TRAF3IP1     | 3.86 | 3.7  | 4.72 | 4.68 | 4.46 | 4.26 | 5.17 | 5.18 |
| SLC17A5      | 4.21 | 4.16 | 4.45 | 4.7  | 4.47 | 4.26 | 5.31 | 5.34 |
| CHEK1        | 4.67 | 3.95 | 3.97 | 4.57 | 4.25 | 4.26 | 5.6  | 5.45 |
| MEGF6        | 5.24 | 5.07 | 5.08 | 5.08 | 3.88 | 4.27 | 3.93 | 4.46 |
| ZNF318       | 4.02 | 3.78 | 4.7  | 4.94 | 4.34 | 4.27 | 5.14 | 4.7  |
| TCP11L2      | 3.68 | 3.16 | 4.43 | 4.32 | 3.99 | 4.27 | 5.56 | 4.99 |
| LRRC23       | 5.33 | 4.86 | 5.93 | 5.77 | 4.54 | 4.27 | 5.4  | 5.15 |
| PGGT1B       | 3.45 | 3    | 3.61 | 4.32 | 4.28 | 4.27 | 5.92 | 5.48 |
| CDH8         | 3.91 | 3.93 | 4.17 | 4.37 | 4.49 | 4.27 | 6.32 | 5.48 |
| VPS50        | 4.31 | 4.75 | 5.22 | 5.5  | 5.38 | 4.27 | 8.65 | 7.16 |
| SCYL3        | 3.59 | 3.25 | 3.86 | 4.64 | 4.44 | 4.28 | 5.92 | 4.53 |
| FABP6        | 4.28 | 4.17 | 3.41 | 3.52 | 3.2  | 4.28 | 4.25 | 4.75 |
| GTPBP8       | 4.02 | 3.48 | 4.05 | 3.55 | 4.94 | 4.28 | 5.95 | 5.18 |
| ZNF800       | 4.06 | 3.78 | 4.79 | 5.28 | 4.37 | 4.28 | 5.88 | 5.89 |
| ABCC10       | 4.13 | 4.52 | 3.73 | 3.7  | 4.5  | 4.29 | 4.25 | 4.08 |
| ST7          | 4.01 | 3.87 | 4.03 | 3.75 | 3.8  | 4.29 | 4.35 | 4.23 |
| HHAT         | 4.7  | 3.84 | 4.52 | 4.3  | 4.3  | 4.29 | 4.45 | 4.4  |
| BDH1         | 3.65 | 3.54 | 4.11 | 4.25 | 4.23 | 4.29 | 4.36 | 4.76 |
| ZNF426       | 3.58 | 3.54 | 4.39 | 4.48 | 4.47 | 4.29 | 5.58 | 4.88 |
| C12orf4      | 3.81 | 3.59 | 4.75 | 4.85 | 4.98 | 4.29 | 6.85 | 5.71 |
| PRDM8        | 3.3  | 3.11 | 3.85 | 4.01 | 3.93 | 4.3  | 4.01 | 4.23 |
| SLC25A43     | 4.53 | 3.64 | 3.9  | 4.64 | 4.48 | 4.3  | 4.4  | 4.55 |
| CCDC93       | 3.82 | 3.93 | 3.97 | 4.51 | 4.73 | 4.3  | 5.44 | 5.29 |
| LRCH1        | 4.45 | 4.37 | 5.22 | 5.16 | 4.63 | 4.3  | 5.52 | 5.44 |
| CDK3         | 3.88 | 3.48 | 4.73 | 4    | 3.76 | 4.31 | 4.13 | 4.25 |
| STIM2        | 3.96 | 4.16 | 4.59 | 4.89 | 4.24 | 4.31 | 5.64 | 5.1  |
| DNAJB14      | 3.86 | 3.16 | 4.45 | 4.13 | 3.33 | 4.31 | 5.99 | 5.88 |
| TRNT1        | 3.63 | 3.62 | 4.4  | 4.85 | 4.45 | 4.31 | 7.18 | 6.09 |
| BMT2         | 4.64 | 4.51 | 4.98 | 5.53 | 4.24 | 4.31 | 6.6  | 6.12 |
| ARL15        | 4.5  | 4.8  | 5.14 | 5.59 | 4.89 | 4.31 | 7.01 | 6.13 |
| MCTS1        | 3.91 | 3.92 | 3.93 | 4.29 | 4.12 | 4.32 | 5.33 | 4.79 |
| CWC22        | 3.9  | 4.6  | 4.67 | 5.29 | 4.4  | 4.32 | 6.73 | 5.66 |
| UBR1         | 4    | 3.55 | 4.7  | 4.82 | 4.8  | 4.32 | 6.75 | 6.04 |
| ZNF83        | 3.71 | 4.08 | 4.44 | 4.68 | 4.21 | 4.32 | 8.3  | 6.84 |
| ATP23        | 3.37 | 4.03 | 3.28 | 3.83 | 3.85 | 4.33 | 4.01 | 4.2  |
| C12orf73     | 3.83 | 4.07 | 3.7  | 4.1  | 4.27 | 4.33 | 5.03 | 4.55 |
| PLA2G12A     | 3.52 | 3.11 | 4.13 | 3.84 | 4.12 | 4.33 | 5.87 | 4.72 |
| LNX2         | 4.94 | 4.03 | 5.16 | 5.49 | 4.95 | 4.33 | 5.52 | 5.55 |
| SPTY2D1      | 4.3  | 3.71 | 4.7  | 5.16 | 4.54 | 4.33 | 6.23 | 5.98 |
| SRGAP2B      | 4.1  | 3.38 | 4.59 | 5.47 | 4.44 | 4.33 | 7.92 | 6.68 |
| ZZEF1        | 4.15 | 3.84 | 4.08 | 4.09 | 4.16 | 4.34 | 4.27 | 4.19 |
| BUB1B-PAK6   | 3.88 | 4.69 | 3.23 | 4.32 | 3.72 | 4.34 | 4.34 | 4.87 |
| CDC7         | 4.26 | 3.38 | 3.93 | 4.89 | 4.12 | 4.34 | 7.08 | 5.26 |
| NOC3L        | 3.5  | 3.63 | 4.91 | 4.68 | 4.71 | 4.34 | 7.43 | 5.9  |
| MTMR6        | 4.65 | 4.15 | 4.57 | 5.81 | 5.23 | 4.34 | 6.96 | 6.18 |
| ARHGAP11A    | 3.7  | 3.12 | 3.85 | 4.04 | 4.39 | 4.34 | 6.98 | 6.73 |
| FKTN         | 3.74 | 3.46 | 4.24 | 5.04 | 3.95 | 4.35 | 7.24 | 5.82 |
| KIF5C        | 3.13 | 3.23 | 4.12 | 4.19 | 4.41 | 4.35 | 6.43 | 5.83 |
| C1orf52      | 4.57 | 4.33 | 4.89 | 4.91 | 4.71 | 4.36 | 6.32 | 5.01 |
| PARP8        | 4.38 | 4.73 | 4.83 | 5.03 | 4.51 | 4.36 | 5.71 | 5.11 |
| CFL2         | 3.71 | 4.01 | 3.98 | 4.26 | 5.07 | 4.36 | 6.31 | 5.29 |
| PEAK1        | 4.41 | 4.04 | 4.7  | 5.33 | 4.55 | 4.36 | 6.21 | 5.45 |
| PPM1D        | 4.12 | 3.4  | 3.72 | 3.92 | 4.63 | 4.37 | 5.3  | 4.56 |
| NOXA1        | 4.67 | 4.62 | 4.34 | 3.84 | 4.14 | 4.38 | 4.24 | 4.15 |
| C6orf223     | 2.74 | 3.85 | 2.63 | 3.16 | 3.59 | 4.38 | 3.23 | 4.36 |
| NCOA2        | 4.03 | 3.49 | 4.41 | 5.46 | 4.1  | 4.38 | 6.38 | 5.6  |
| ELMOD2       | 4.16 | 3.83 | 4.25 | 5.02 | 4.12 | 4.38 | 6.29 | 5.85 |
| SLC27A5      | 3.97 | 4.67 | 3.57 | 4.09 | 4.32 | 4.39 | 3.42 | 4    |
| CIART        | 4.56 | 4.44 | 3.82 | 4.31 | 4.57 | 4.39 | 3.64 | 4.93 |
| TRIM66       | 3.73 | 3.46 | 3.93 | 4.5  | 4.36 | 4.39 | 6.37 | 5.77 |
| ATG5         | 4.64 | 4.64 | 4.41 | 5.23 | 4.72 | 4.39 | 7.61 | 5.98 |
| FBXO42       | 5.03 | 5.3  | 4.82 | 4.8  | 4.44 | 4.4  | 4.62 | 4.27 |
| CSAD         | 3.9  | 4.08 | 3.97 | 4.47 | 4.43 | 4.4  | 6.15 | 5.27 |
| RWDD3        | 3.25 | 3.33 | 3.65 | 4.11 | 3.58 | 4.4  | 6.55 | 5.57 |
| RAPGEF5      | 4.56 | 4.29 | 4.84 | 5.59 | 4.62 | 4.4  | 6.25 | 5.6  |
| COQ3         | 4.34 | 4.46 | 4.73 | 5.08 | 3.89 | 4.41 | 5.37 | 4.77 |
| RAP1GDS1     | 4.38 | 4.05 | 4.5  | 4.89 | 4.74 | 4.41 | 5.28 | 5.43 |
| WDHD1        | 4.3  | 3.56 | 4.8  | 5.4  | 4.28 | 4.41 | 7.24 | 5.99 |
| KIAA1033     | 3.35 | 3.33 | 4.05 | 4.78 | 3.97 | 4.41 | 7.4  | 6.18 |
| RPIA         | 3.66 | 3.4  | 3.96 | 4.24 | 5.25 | 4.42 | 4.95 | 4.41 |
| MAGEA10      | 5.39 | 5.05 | 5.17 | 5.37 | 5.26 | 4.42 | 4.94 | 4.43 |
| SLC12A6      | 3.7  | 3.57 | 4.08 | 4.62 | 4.31 | 4.42 | 5.04 | 4.91 |
| LOC105373132 | 4.26 | 3.6  | 4.67 | 5.47 | 3.98 | 4.42 | 6.09 | 5.13 |
| LRTOMT       | 4.31 | 4.53 | 5.51 | 5.41 | 4.38 | 4.42 | 4.8  | 5.19 |
| EOGT         | 3.76 | 3.25 | 4.24 | 5.58 | 4.47 | 4.42 | 8.29 | 5.81 |
| SPRTN        | 4.09 | 3.39 | 4.05 | 5.19 | 4.87 | 4.42 | 6.31 | 6.05 |
| ARHGAP12     | 3.7  | 3.72 | 4.51 | 5.64 | 4.34 | 4.42 | 7.39 | 6.85 |
| S1PR3        | 4.68 | 4.69 | 4.97 | 5.02 | 4.09 | 4.43 | 4.18 | 4.07 |
| TMEM241      | 4.07 | 4.23 | 4.27 | 3.75 | 4.17 | 4.43 | 4.47 | 4.31 |
| COQ10A       | 4.13 | 3.11 | 4.64 | 4.09 | 4.09 | 4.43 | 4.11 | 4.46 |
| PHF7         | 3.08 | 3.32 | 2.6  | 3.12 | 4.1  | 4.43 | 4.67 | 4.7  |
| OSBPL11      | 3.51 | 3.66 | 3.87 | 4.63 | 4.59 | 4.43 | 5.35 | 5.1  |
| KBTBD6       | 3.71 | 2.8  | 4.13 | 4.47 | 4.95 | 4.43 | 5.86 | 5.19 |

|              |      |      |      |      |      |      |      |      |
|--------------|------|------|------|------|------|------|------|------|
| LYRM5        | 4.57 | 3.48 | 4.72 | 4.06 | 5.78 | 4.43 | 5.77 | 5.74 |
| PPIC         | 3.83 | 3.63 | 3.67 | 4.16 | 3.86 | 4.43 | 5.51 | 5.83 |
| PPIL4        | 5.24 | 5.36 | 4.69 | 5.72 | 5.65 | 4.43 | 7.39 | 6.7  |
| SH2D3A       | 4.55 | 5.09 | 4.79 | 4.44 | 5.25 | 4.44 | 4.4  | 4.77 |
| PEX13        | 3.57 | 3.13 | 4.08 | 4.14 | 4.1  | 4.44 | 6.29 | 5.1  |
| DEPDC1B      | 4.26 | 3.16 | 3.95 | 4.27 | 4.73 | 4.44 | 8.28 | 6    |
| LYRM2        | 3.81 | 3.23 | 4.32 | 5.29 | 4.92 | 4.44 | 7.51 | 6.17 |
| TRIP4        | 4.59 | 4.48 | 4.67 | 5.34 | 4.44 | 4.44 | 5.58 | 6.19 |
| GPR89B       | 2.91 | 2.61 | 3.49 | 2.54 | 3.88 | 4.44 | 4.41 | 6.47 |
| ASPM         | 3.51 | 3.3  | 3.77 | 4.14 | 4.29 | 4.44 | 7.77 | 6.94 |
| ZNF48        | 5.74 | 5.89 | 4.97 | 5.03 | 4.56 | 4.45 | 3.29 | 3.7  |
| CCDC102A     | 4.9  | 4.66 | 4.51 | 4.42 | 3.91 | 4.45 | 3.38 | 3.75 |
| FAM156A      | 4.4  | 5.05 | 3.22 | 3.55 | 4.1  | 4.45 | 3.1  | 3.9  |
| DEPDC5       | 3.76 | 3.53 | 3.7  | 3.85 | 4.33 | 4.45 | 4.76 | 4.11 |
| VTI1A        | 3.79 | 3.71 | 4.18 | 4.37 | 4.37 | 4.45 | 5.37 | 4.71 |
| AMN1         | 2.93 | 3.05 | 2.95 | 3.05 | 4.11 | 4.45 | 5.43 | 4.9  |
| FAM73A       | 3.22 | 3.48 | 3.82 | 4.82 | 4.28 | 4.45 | 7.59 | 6.19 |
| INTS2        | 3.13 | 3.43 | 4.14 | 5.46 | 3.99 | 4.45 | 7.31 | 6.42 |
| GALNT14      | 4.21 | 4.2  | 4.42 | 4.67 | 4.5  | 4.46 | 4.31 | 4.42 |
| ANKRD1       | 2.58 | 2.24 | 3.12 | 3.82 | 4.85 | 4.46 | 5.52 | 4.7  |
| ZNF589       | 4.66 | 4.9  | 5.05 | 5.1  | 4.52 | 4.46 | 5.07 | 5.06 |
| SRR          | 5.16 | 3.78 | 4.6  | 5.22 | 3.79 | 4.46 | 5.25 | 5.08 |
| MGA          | 3.68 | 3.72 | 4.95 | 5.56 | 5.09 | 4.46 | 6.52 | 5.9  |
| WDR36        | 4.43 | 3.66 | 4.49 | 5.44 | 4.98 | 4.46 | 7.76 | 6.53 |
| TRAPPC8      | 3.64 | 3.75 | 4.47 | 5    | 4.22 | 4.46 | 7.46 | 6.54 |
| STK38L       | 4.71 | 3.91 | 5.79 | 6.85 | 5.21 | 4.46 | 8.5  | 7.42 |
| SAMD10       | 4.83 | 3.92 | 4.38 | 4.3  | 3.85 | 4.47 | 3.52 | 3.85 |
| KIF7         | 5.05 | 5.01 | 5.11 | 4.93 | 4.22 | 4.47 | 4.17 | 4.04 |
| FAM72A       | 2.15 | 3.17 | 2.08 | 2.38 | 5.21 | 4.47 | 6.06 | 4.23 |
| C1orf74      | 5.32 | 4.76 | 4.8  | 5.2  | 4.98 | 4.47 | 4.71 | 4.66 |
| LRR37A2      | 4.86 | 4.05 | 4.97 | 5.72 | 5.23 | 4.47 | 6.66 | 6.52 |
| RLIM         | 3.53 | 3.34 | 4.56 | 5.79 | 4.27 | 4.47 | 7.31 | 6.52 |
| PRDM11       | 6.43 | 5.66 | 5.4  | 4.79 | 4.57 | 4.48 | 3.37 | 4.19 |
| UNC13B       | 3.87 | 4.01 | 3.97 | 3.89 | 4.54 | 4.48 | 4.68 | 4.78 |
| TRIM34       | 5.19 | 5.17 | 5.62 | 5.62 | 4.14 | 4.48 | 6.67 | 4.89 |
| ZCCHC8       | 5.04 | 3.95 | 4.88 | 5.16 | 4.82 | 4.48 | 5.89 | 5.19 |
| CACNB1       | 5.08 | 4.57 | 4.66 | 5.72 | 5.19 | 4.48 | 6.06 | 5.37 |
| TIGD1        | 4.52 | 3.87 | 4.47 | 4.9  | 4.89 | 4.48 | 6.92 | 5.99 |
| STAG1        | 4    | 3.51 | 5.11 | 5.38 | 5.07 | 4.48 | 7.79 | 6.13 |
| CDC42BPA     | 3.42 | 2.96 | 4.13 | 5.27 | 4.36 | 4.48 | 7.02 | 6.49 |
| PEX11G       | 3.12 | 4.21 | 3.45 | 4.23 | 4.29 | 4.49 | 2.63 | 2.6  |
| NFKBIE       | 5.36 | 5.29 | 4.48 | 4.17 | 5.63 | 4.49 | 3.89 | 3.83 |
| LIN7B        | 4.81 | 4.42 | 3.57 | 4.42 | 4.82 | 4.49 | 4.52 | 4.2  |
| PLD6         | 3.44 | 3.38 | 3.07 | 3.46 | 4.59 | 4.49 | 4.78 | 4.54 |
| DFFB         | 4.09 | 3.36 | 3.56 | 3.98 | 3.69 | 4.49 | 5.04 | 5.01 |
| CACNG7       | 5.53 | 6.42 | 5.7  | 5.16 | 4.15 | 4.49 | 3.4  | 5.06 |
| EXD2         | 4.39 | 5.02 | 5.13 | 4.7  | 5.5  | 4.49 | 5.84 | 5.36 |
| PAK3         | 3.39 | 3.95 | 4.77 | 4.92 | 4.02 | 4.49 | 4.94 | 5.71 |
| MTMR10       | 4.08 | 3.7  | 4.64 | 4.85 | 4.91 | 4.49 | 6.21 | 6.04 |
| KIAA2026     | 3.96 | 3.77 | 4.17 | 5.77 | 3.92 | 4.49 | 8.3  | 7.4  |
| IRX5         | 4    | 3.79 | 3.96 | 3.61 | 4.35 | 4.5  | 3.79 | 2.99 |
| APOL2        | 5.33 | 4.66 | 4.38 | 5.39 | 4.49 | 4.5  | 4.38 | 4.67 |
| BLOC1S5      | 3.53 | 3.59 | 4.25 | 4.44 | 4.42 | 4.5  | 6.56 | 4.78 |
| RUBCN        | 4.44 | 4.11 | 4.17 | 4.25 | 4.58 | 4.5  | 4.84 | 4.92 |
| GPRC5A       | 6.73 | 6.67 | 6.24 | 6.5  | 5.31 | 4.5  | 4.87 | 5.2  |
| MMP17        | 3.56 | 3.32 | 3.27 | 3.09 | 4.03 | 4.51 | 2.76 | 4.21 |
| OXNAD1       | 3.9  | 3.13 | 3.53 | 3.9  | 3.89 | 4.51 | 5.28 | 4.22 |
| EID2B        | 4.09 | 3.55 | 3.7  | 4    | 4.87 | 4.51 | 4.93 | 4.23 |
| TMEM255B     | 4.48 | 4.31 | 4.71 | 4    | 4.43 | 4.51 | 3.76 | 4.36 |
| ASB7         | 4.27 | 4.4  | 5.12 | 4.54 | 5.05 | 4.51 | 5.54 | 5.31 |
| ZYG11B       | 3.59 | 2.94 | 4.08 | 4.68 | 4.11 | 4.51 | 6.53 | 5.69 |
| LTN1         | 3.9  | 3.71 | 4.06 | 4.54 | 3.92 | 4.51 | 7.27 | 6.85 |
| VCX3A        | 3.27 | 2.26 | 4.33 | 4.96 | 3.84 | 4.52 | 2.73 | 1.92 |
| C4A          | 5.29 | 5.51 | 4.31 | 4.57 | 3.84 | 4.52 | 4.21 | 1.99 |
| TRMT44       | 4.15 | 3.92 | 4.63 | 4.51 | 4.41 | 4.52 | 4.18 | 4.22 |
| CCDC136      | 3.68 | 3.84 | 3.97 | 4.42 | 3.93 | 4.52 | 5.44 | 4.87 |
| LURAP1L      | 3.24 | 3.3  | 3.98 | 5.12 | 4.33 | 4.52 | 5.44 | 5.33 |
| FEM1B        | 4.54 | 4.12 | 5.02 | 5.73 | 4.64 | 4.52 | 6.17 | 5.67 |
| ALS2         | 4.57 | 4.37 | 4.59 | 5.58 | 4.69 | 4.52 | 5.58 | 5.78 |
| SLF2         | 4.69 | 3.14 | 4.42 | 4.92 | 4.24 | 4.52 | 7.45 | 5.89 |
| GEM          | 3.87 | 4.43 | 3.42 | 4.76 | 4.14 | 4.53 | 5.71 | 4.41 |
| C9orf91      | 4.04 | 4.45 | 4.25 | 4.41 | 4.79 | 4.53 | 4.82 | 4.71 |
| CRTC3        | 4.3  | 5.03 | 4.9  | 4.77 | 4.79 | 4.53 | 4.73 | 4.92 |
| ETV6         | 5.05 | 4.91 | 5.43 | 5.87 | 4.81 | 4.53 | 5.86 | 5.06 |
| CCDC77       | 3.74 | 3.48 | 4.55 | 4.57 | 4.53 | 4.53 | 6.22 | 5.26 |
| CENPQ        | 4.45 | 4.36 | 4.34 | 4.5  | 4.22 | 4.53 | 6.25 | 5.46 |
| VWA8         | 4.08 | 3.83 | 4.46 | 5.17 | 4.89 | 4.53 | 6.89 | 6.38 |
| ELK4         | 3.23 | 3.53 | 3.98 | 5.48 | 4.53 | 4.53 | 7.73 | 6.76 |
| LOC102724770 | 4.28 | 5.35 | 4.77 | 5.47 | 3.95 | 4.54 | 4.93 | 2.79 |
| INPP4A       | 4.3  | 4.71 | 4.48 | 4.64 | 4.34 | 4.54 | 5.37 | 5.34 |
| GPATCH2L     | 3.97 | 3    | 4.14 | 4.86 | 4.07 | 4.54 | 6.36 | 6.36 |
| ATR          | 3.58 | 3.08 | 4.32 | 5.45 | 5.66 | 4.54 | 8.78 | 6.73 |
| DPYSL4       | 4.93 | 4.23 | 4.49 | 3.94 | 4.94 | 4.55 | 4.08 | 4.47 |

|           |      |      |      |      |      |      |       |      |
|-----------|------|------|------|------|------|------|-------|------|
| KIAA0922  | 3.91 | 3.94 | 4.02 | 4.2  | 4.2  | 4.55 | 5.06  | 4.68 |
| AGAP6     | 3.39 | 3.45 | 4.02 | 3.63 | 3.19 | 4.55 | 5.9   | 4.74 |
| MREG      | 4.02 | 4.17 | 3.38 | 4.56 | 4.68 | 4.55 | 4.19  | 5.01 |
| DNASE1    | 4.86 | 4.03 | 5.33 | 5.86 | 4.6  | 4.55 | 5.9   | 5.13 |
| MAP2      | 3.41 | 3.24 | 4.26 | 5.47 | 4.31 | 4.55 | 6.76  | 5.94 |
| ZDHHC17   | 4.23 | 3.59 | 4.32 | 5.5  | 4.39 | 4.55 | 8.14  | 6.61 |
| COG6      | 4.63 | 3.77 | 4.84 | 6.01 | 5.06 | 4.55 | 8.26  | 6.92 |
| CCNT2     | 4.17 | 4.11 | 4.66 | 5.73 | 4.78 | 4.55 | 8.36  | 7    |
| RARRES2   | 2.85 | 3.33 | 2.04 | 2.51 | 4.84 | 4.56 | 2.75  | 3.52 |
| CABLES1   | 3.67 | 3.76 | 3.65 | 3.85 | 4.86 | 4.56 | 3.84  | 4.21 |
| C16orf54  | 5.88 | 6.59 | 5.81 | 5.14 | 4.33 | 4.56 | 3.96  | 4.78 |
| TRMT10B   | 2.82 | 2.76 | 4.3  | 4.34 | 3.83 | 4.56 | 4.87  | 5.07 |
| NCK1      | 4.25 | 4.51 | 4.96 | 5.36 | 4.55 | 4.56 | 6.58  | 5.53 |
| FBXL4     | 4.55 | 4.49 | 4.4  | 5.43 | 5.71 | 4.56 | 6.67  | 6.03 |
| TRIM52    | 4.7  | 4.07 | 4.5  | 6.6  | 4.72 | 4.56 | 9.1   | 6.52 |
| PIKFYVE   | 3.92 | 3.57 | 4.41 | 5.48 | 5.01 | 4.56 | 8.24  | 6.59 |
| TMEM116   | 4.65 | 3.46 | 3.79 | 4.24 | 4.08 | 4.57 | 4.89  | 3.9  |
| MTRNR2L3  | 3.91 | 4.57 | 4.09 | 4.34 | 3.88 | 4.57 | 4.65  | 4.09 |
| PPP1R3D   | 4.08 | 4.46 | 4.78 | 4.1  | 4.59 | 4.57 | 4.29  | 4.31 |
| SYNE3     | 4.3  | 4.2  | 4.24 | 4.1  | 4.56 | 4.57 | 4.16  | 4.54 |
| NRP2      | 4.03 | 3.99 | 3.9  | 4.34 | 4.76 | 4.57 | 5.14  | 5.02 |
| POC1B     | 3.22 | 3.51 | 3.6  | 3.7  | 4.29 | 4.57 | 6.07  | 5.21 |
| PWWP2A    | 4.21 | 4.42 | 4.75 | 5.31 | 4.5  | 4.57 | 6.11  | 5.54 |
| N6AMT1    | 4.01 | 3.4  | 4.37 | 4.59 | 6.45 | 4.57 | 5.99  | 5.96 |
| MPP5      | 4.21 | 3.46 | 4.4  | 5    | 5.19 | 4.57 | 6.47  | 6.5  |
| BAG4      | 3.99 | 3.44 | 4.76 | 5.72 | 4.7  | 4.57 | 6.34  | 6.52 |
| FAM13B    | 4.2  | 3.77 | 4.64 | 5.74 | 4.72 | 4.57 | 8.43  | 7    |
| PIK3CA    | 4.54 | 4.51 | 4.64 | 6.18 | 5.07 | 4.57 | 8.49  | 7.45 |
| FKBP11    | 2.63 | 2.58 | 2.89 | 4.15 | 3.42 | 4.58 | 5.24  | 3.55 |
| ARHGAP4   | 4.73 | 4.32 | 4.58 | 4.27 | 3.97 | 4.58 | 3.49  | 3.83 |
| FANCE     | 4.62 | 5.54 | 4.22 | 4.69 | 4.88 | 4.58 | 4.59  | 4.54 |
| C3orf58   | 5.1  | 4.83 | 5.55 | 6.37 | 4.49 | 4.58 | 5.89  | 4.87 |
| PARP6     | 5.97 | 5.85 | 6.07 | 7.49 | 5.85 | 4.58 | 7.44  | 6.23 |
| ZNF669    | 4.92 | 4.53 | 5.16 | 5.24 | 5.7  | 4.58 | 6.64  | 6.5  |
| ASB3      | 5.13 | 4.92 | 5.28 | 6.1  | 5.4  | 4.58 | 4.18  | 7.25 |
| TSPAN10   | 5.48 | 5.63 | 5.22 | 4.76 | 4.43 | 4.59 | 2.98  | 4.02 |
| NRF1      | 5.19 | 5.49 | 5.1  | 4.74 | 4.64 | 4.59 | 5.11  | 4.26 |
| SMIM10L1  | 3.83 | 3.66 | 4.59 | 4.49 | 3.98 | 4.59 | 4.73  | 4.27 |
| ZFYVE9    | 4.48 | 4.55 | 5.01 | 4.62 | 4.36 | 4.59 | 5.52  | 5.11 |
| CLMN      | 4.64 | 4.87 | 4.54 | 4.81 | 4.73 | 4.6  | 4.62  | 4.42 |
| LHFPL2    | 3.97 | 3.52 | 4.06 | 4.44 | 4.36 | 4.6  | 4.59  | 4.84 |
| XPA       | 3.54 | 3.8  | 4.02 | 5.16 | 4.47 | 4.6  | 6.69  | 5.19 |
| ADAM23    | 4.09 | 4.22 | 4.44 | 5.06 | 4.63 | 4.6  | 5.19  | 5.39 |
| METTL15   | 4.03 | 3.57 | 4.21 | 5.03 | 3.71 | 4.6  | 7.09  | 5.61 |
| ZNF189    | 4.87 | 4.64 | 5.44 | 7.02 | 4.59 | 4.6  | 8.25  | 7.08 |
| EFNB2     | 5.02 | 4.54 | 4.9  | 4.93 | 4.48 | 4.61 | 4.64  | 4.41 |
| LRIG2     | 3.81 | 3.83 | 4.39 | 5    | 4.11 | 4.61 | 5.77  | 5.37 |
| NBPF14    | 4.95 | 4.7  | 4.69 | 5.28 | 4.81 | 4.61 | 6     | 5.72 |
| ZMYM1     | 3.96 | 4.12 | 4.57 | 5.55 | 5.27 | 4.61 | 8.77  | 7    |
| TROVE2    | 4.87 | 4.49 | 4.85 | 5.78 | 4.71 | 4.61 | 8.79  | 7.06 |
| ATP11B    | 4.15 | 3.78 | 4.64 | 5.5  | 4.63 | 4.61 | 8.03  | 7.23 |
| DOK4      | 5.24 | 5.74 | 5.18 | 4.9  | 4.34 | 4.62 | 4.5   | 4.36 |
| NAF1      | 5.49 | 4.77 | 5.4  | 5.74 | 5.42 | 4.62 | 5.48  | 5.41 |
| TMOD3     | 4.11 | 3.91 | 5.25 | 5.75 | 4.58 | 4.62 | 6.53  | 6.29 |
| MIOS      | 4.98 | 5.15 | 5.85 | 5.49 | 5.32 | 4.62 | 6.93  | 6.54 |
| TMEM88B   | 4.54 | 3.8  | 3.91 | 3.67 | 3.76 | 4.63 | 2.76  | 3.33 |
| ZNF784    | 4.83 | 4.69 | 5.11 | 3.97 | 4.32 | 4.63 | 3.5   | 3.54 |
| GMEB1     | 3.75 | 4.22 | 4.46 | 4.44 | 4.63 | 4.63 | 4.23  | 4.02 |
| WBP4      | 3.84 | 4.42 | 4.55 | 5.75 | 3.88 | 4.63 | 7.46  | 6.15 |
| TTF1      | 4.53 | 3.74 | 4.29 | 5.17 | 5.12 | 4.63 | 5.98  | 6.35 |
| FOXO6     | 6.51 | 7.01 | 5.9  | 6.01 | 4.23 | 4.64 | 3.03  | 3.6  |
| GATA6     | 5.67 | 4.51 | 5.13 | 4.67 | 4.83 | 4.64 | 3.46  | 3.94 |
| PLEKHN1   | 4.71 | 4.4  | 4.64 | 5.3  | 4.53 | 4.64 | 3.96  | 4.09 |
| PRRG2     | 4.42 | 4.99 | 3.68 | 3.4  | 4.25 | 4.64 | 3.77  | 4.12 |
| PLCXD1    | 4.92 | 4.78 | 4.65 | 3.91 | 4.47 | 4.64 | 3.98  | 4.68 |
| BTN2A2    | 4.25 | 4.31 | 4.12 | 4.52 | 4.53 | 4.64 | 4.76  | 4.71 |
| SGMS1     | 3.99 | 3.68 | 4.39 | 4.77 | 4.99 | 4.64 | 5.44  | 5.06 |
| AP5B1     | 4.49 | 4.41 | 4.58 | 4.12 | 4.16 | 4.65 | 3.91  | 4.39 |
| BUD13     | 3.99 | 5.02 | 4.43 | 5.01 | 4.09 | 4.65 | 4.64  | 4.49 |
| LDLRAD3   | 4.38 | 4.56 | 4.27 | 4.33 | 5.51 | 4.65 | 5.86  | 5.14 |
| CCDC113   | 4.12 | 4.29 | 5.09 | 5.47 | 5.06 | 4.65 | 4.9   | 5.34 |
| XRCC2     | 3.59 | 3.41 | 4.21 | 5.5  | 4.6  | 4.65 | 7.76  | 5.56 |
| CNTLN     | 4.09 | 3.79 | 4.31 | 5.08 | 4.99 | 4.65 | 7.85  | 6.29 |
| SHISA9    | 4.02 | 3.27 | 4.52 | 5.77 | 4.01 | 4.65 | 8.31  | 7.08 |
| SLC45A1   | 6.31 | 6.17 | 6.26 | 5.53 | 4.36 | 4.66 | 3.84  | 4.57 |
| TTL5      | 4.89 | 4.64 | 5.01 | 5.06 | 4.57 | 4.66 | 5.06  | 4.94 |
| BTBD7     | 3.68 | 3.13 | 4.55 | 4.61 | 3.95 | 4.66 | 4.82  | 5.05 |
| HAS2      | 5.77 | 4.95 | 5.56 | 6.75 | 4.49 | 4.66 | 6.19  | 5.31 |
| C20orf194 | 4.59 | 4.87 | 4.94 | 5.63 | 5.37 | 4.66 | 5.97  | 5.45 |
| TMEM161B  | 4.87 | 4.66 | 5.37 | 5.55 | 5.28 | 4.66 | 10.17 | 8.64 |
| NTF4      | 4.42 | 4.42 | 3.64 | 4.34 | 3.7  | 4.67 | 4.15  | 3.85 |
| CLTCL1    | 4.46 | 4.62 | 4.26 | 4.05 | 4.98 | 4.67 | 5.38  | 5.19 |
| DLAT      | 4.04 | 4.44 | 4.92 | 5.03 | 5.52 | 4.67 | 6.62  | 5.7  |
| MTERF1    | 3.99 | 4.6  | 4.92 | 5.26 | 3.99 | 4.67 | 7.76  | 5.75 |
| MCEE      | 4.58 | 4.51 | 4.6  | 5.69 | 5.72 | 4.67 | 6.7   | 5.91 |



|              |      |       |      |      |      |      |      |      |
|--------------|------|-------|------|------|------|------|------|------|
| DCUN1D1      | 4.08 | 4.61  | 4.48 | 5.17 | 5.1  | 4.67 | 8.14 | 6.55 |
| USP8         | 4.48 | 4.49  | 5.56 | 7.24 | 5.63 | 4.67 | 8.71 | 7.97 |
| TBL1X        | 4.78 | 4.95  | 4.84 | 5.3  | 4.47 | 4.68 | 4.62 | 4.52 |
| CCDC174      | 5.09 | 4.87  | 5.08 | 4.41 | 4.56 | 4.68 | 5.84 | 4.98 |
| SLC35A5      | 4.62 | 4.74  | 5.14 | 5.86 | 5.18 | 4.68 | 7.25 | 5.39 |
| FAM98B       | 4.35 | 3.84  | 4.48 | 4.91 | 5.24 | 4.68 | 7.48 | 5.95 |
| SMIM3        | 6.33 | 5.94  | 5.75 | 6.16 | 4.22 | 4.69 | 4.84 | 4.31 |
| ALKBH1       | 4.43 | 4.57  | 3.98 | 3.92 | 4.47 | 4.69 | 4.2  | 4.52 |
| KIAA0355     | 4.41 | 4.28  | 4.45 | 5.12 | 5    | 4.69 | 4.85 | 4.89 |
| PDSS1        | 3.55 | 3.41  | 3.57 | 4.8  | 4.75 | 4.69 | 5.48 | 5.09 |
| NAPG         | 3.32 | 3.79  | 4.18 | 4.63 | 4.19 | 4.69 | 6.71 | 5.95 |
| DBP          | 3.89 | 5.16  | 3.86 | 3.54 | 4.15 | 4.7  | 3.24 | 3.84 |
| KHDC1        | 5.14 | 5.17  | 3.79 | 3.79 | 3.89 | 4.7  | 3.89 | 4.56 |
| ZNF398       | 5    | 5.45  | 5.58 | 5.32 | 4.66 | 4.7  | 4.82 | 4.68 |
| PXK          | 4.45 | 4.43  | 4.46 | 5.03 | 4.16 | 4.7  | 4.5  | 4.83 |
| ARNTL        | 4.81 | 4.11  | 4.4  | 5.15 | 4.8  | 4.7  | 5.63 | 4.84 |
| FMO3         | 4.75 | 4.86  | 5.79 | 5.37 | 5.39 | 4.7  | 6.13 | 5.42 |
| FAM175B      | 4.29 | 3.59  | 4.78 | 5.66 | 4.69 | 4.7  | 7.22 | 6.2  |
| NAA25        | 3.78 | 3.31  | 4.85 | 5.2  | 4.58 | 4.7  | 7.84 | 6.86 |
| SNAI3        | 3.78 | 4.51  | 3.7  | 3.52 | 3.68 | 4.71 | 3.18 | 3.89 |
| POC5         | 4.32 | 3.56  | 4.19 | 5.41 | 4.71 | 4.71 | 7    | 5.31 |
| RASSF8       | 5.21 | 4.94  | 5.28 | 7.08 | 4.81 | 4.71 | 7.97 | 6.62 |
| SPDL1        | 4.53 | 3.4   | 4.68 | 5.04 | 4.46 | 4.71 | 8.57 | 7.47 |
| ZNF710       | 5.18 | 5.52  | 4.77 | 5.23 | 5.24 | 4.72 | 4.55 | 4.56 |
| LOC107986794 | 2.62 | 3.42  | 3.17 | 3.65 | 3.76 | 4.72 | 5.27 | 4.83 |
| KCNK2        | 4.11 | 3.55  | 4.29 | 4.67 | 4.53 | 4.72 | 5.15 | 5.07 |
| LMO4         | 5.2  | 5.23  | 5.08 | 5.27 | 4.65 | 4.72 | 4.86 | 5.25 |
| THSD4        | 4.88 | 4.92  | 4.94 | 5.17 | 4.85 | 4.72 | 5.23 | 5.25 |
| ZNF766       | 3.9  | 3.8   | 4.71 | 5.11 | 4.35 | 4.72 | 6.21 | 5.94 |
| RAB1F        | 4.51 | 5.32  | 5.08 | 5.5  | 4.7  | 4.73 | 5    | 4.73 |
| UBE4A        | 3.79 | 3.53  | 3.67 | 4.62 | 4.35 | 4.73 | 6.27 | 5.08 |
| VANGL2       | 4.45 | 5.35  | 5.11 | 4.96 | 4.87 | 4.73 | 4.2  | 5.11 |
| FABP5        | 4.04 | 4.58  | 4.98 | 5.44 | 4.45 | 4.73 | 5.91 | 5.94 |
| LGALS8       | 5.31 | 4.28  | 6.07 | 6.21 | 5.19 | 4.73 | 7.35 | 6.4  |
| LOC101926982 | 3.37 | 3.81  | 3.33 | 4.86 | 2.67 | 4.74 | 5.95 | 4.23 |
| CLASP2       | 4.45 | 3.83  | 4.93 | 4.63 | 5.14 | 4.74 | 6.16 | 5.43 |
| ATG14        | 4.74 | 4.35  | 4.83 | 5.11 | 5.11 | 4.74 | 7.09 | 5.72 |
| AKR1B15      | 4.37 | 4.41  | 5.18 | 5.37 | 4.31 | 4.74 | 4.85 | 5.99 |
| L3HYPDH      | 5.45 | 4.88  | 4.53 | 4.78 | 5.26 | 4.74 | 6.57 | 6.05 |
| DSC2         | 5.04 | 5.03  | 5.95 | 6.13 | 4.72 | 4.74 | 6.8  | 6.53 |
| GPR3         | 4.41 | 4.26  | 4.78 | 4.72 | 4.93 | 4.75 | 4.33 | 4.57 |
| HIVEP3       | 4.21 | 4.14  | 4.1  | 4.53 | 4.48 | 4.75 | 4.38 | 4.92 |
| SOX11        | 4.47 | 4.52  | 4.89 | 5.38 | 5    | 4.75 | 4.89 | 5    |
| TBC1D4       | 4.49 | 3.79  | 5.03 | 5.53 | 4.62 | 4.75 | 6.02 | 5.7  |
| TMEM62       | 5.35 | 5.45  | 4.97 | 5.27 | 5.71 | 4.75 | 6.67 | 5.76 |
| SAR1B        | 3.93 | 3.53  | 4.52 | 5.49 | 4.84 | 4.75 | 6.79 | 6.43 |
| HIPK3        | 3.85 | 4.16  | 4.82 | 5.64 | 4.86 | 4.75 | 6.96 | 6.51 |
| ICE2         | 4.36 | 3.82  | 5.21 | 5.33 | 4.78 | 4.75 | 8.87 | 6.83 |
| KRAS         | 3.98 | 4.16  | 4.93 | 5.91 | 5.38 | 4.75 | 8.66 | 7.24 |
| SMCHD1       | 4.01 | 3.39  | 5.17 | 6.12 | 4.51 | 4.75 | 9.14 | 7.57 |
| ARMC9        | 5.24 | 5.45  | 5.62 | 5.76 | 4.75 | 4.76 | 4.77 | 4.79 |
| THNSL1       | 4.02 | 3.11  | 4.35 | 4.73 | 4.71 | 4.76 | 6.76 | 5.49 |
| EAF1         | 4.03 | 3.71  | 4.19 | 4.29 | 5.15 | 4.76 | 5.54 | 5.7  |
| HOMEZ        | 5.88 | 6.41  | 5.58 | 5.6  | 5.54 | 4.76 | 4.68 | 5.73 |
| CHM          | 3.99 | 3.91  | 4.68 | 5.39 | 4.49 | 4.76 | 7.82 | 6.97 |
| EPHB2        | 4.49 | 4.67  | 4.42 | 3.92 | 4.52 | 4.77 | 3.95 | 4.53 |
| RREB1        | 4.92 | 5.11  | 4.77 | 4.83 | 4.01 | 4.77 | 4.59 | 4.59 |
| STEAP1       | 3.83 | 3.87  | 4.02 | 4.41 | 5.1  | 4.77 | 5.77 | 4.75 |
| PALM         | 8.84 | 10.12 | 8.27 | 7.27 | 4.69 | 4.77 | 3.34 | 5.14 |
| WDR44        | 4.23 | 3.97  | 4.12 | 4.91 | 4.6  | 4.77 | 6.18 | 5.92 |
| SLC7A11      | 3.34 | 3.27  | 4.18 | 5.36 | 4.25 | 4.77 | 9.78 | 7.03 |
| WDFY2        | 4.55 | 4.6   | 4.45 | 5.71 | 4.72 | 4.78 | 4.98 | 4.88 |
| SYNJ2        | 4.45 | 4.77  | 5.49 | 5.3  | 5.09 | 4.78 | 5.38 | 5.29 |
| ANKRD6       | 4.12 | 4     | 4.89 | 5.1  | 4.51 | 4.78 | 6.89 | 6.17 |
| LOC107986877 | 4.99 | 5     | 4.99 | 6.43 | 5.63 | 4.79 | 4.24 | 4.43 |
| OPN3         | 4.67 | 4.7   | 4.96 | 5.37 | 5.2  | 4.79 | 5.57 | 5.2  |
| CLCA2        | 3.7  | 2.91  | 4.22 | 4.17 | 4.64 | 4.79 | 6.42 | 5.35 |
| STAM         | 4.22 | 4.01  | 4.86 | 5.58 | 5    | 4.79 | 6.42 | 5.67 |
| POGLUT1      | 4.47 | 4.11  | 4.69 | 5.15 | 5.3  | 4.79 | 7.6  | 5.97 |
| PAN3         | 4.06 | 3.53  | 4.1  | 5.66 | 4.29 | 4.79 | 6.06 | 6.26 |
| SPDYE2       | 3.11 | 4.22  | 3.98 | 4.23 | 3.86 | 4.79 | 4.73 | 6.84 |
| ZNHIT6       | 5.08 | 4.27  | 4.84 | 5.71 | 5.53 | 4.79 | 8.21 | 7.17 |
| LRRC8E       | 4.38 | 4.13  | 4.45 | 4.25 | 4.38 | 4.8  | 3.31 | 4.06 |
| QRS1L        | 3.54 | 4     | 4.12 | 4.28 | 4.63 | 4.8  | 5.16 | 4.88 |
| NR1D2        | 2.68 | 2.65  | 3.36 | 4.19 | 4.49 | 4.8  | 7.26 | 6.5  |
| SHOC2        | 4.38 | 4.34  | 5.01 | 6.07 | 4.87 | 4.8  | 8.41 | 7.51 |
| ARHGAP39     | 4.76 | 4.75  | 4.26 | 4.5  | 4.86 | 4.81 | 4.04 | 4.22 |
| UBE2D4       | 5.05 | 4.86  | 4.87 | 4.87 | 5.25 | 4.81 | 5.06 | 4.71 |
| BRAF         | 4.29 | 4.64  | 4.88 | 5.93 | 5.01 | 4.81 | 6.11 | 5.97 |
| CEACAM1      | 5.34 | 5.48  | 6.35 | 5.82 | 6    | 4.81 | 4.53 | 6.12 |
| PCGF6        | 4.26 | 4.36  | 5.09 | 5.27 | 6.25 | 4.81 | 6.62 | 6.16 |
| NHLRC3       | 4.34 | 4.34  | 5.19 | 6.82 | 4.56 | 4.81 | 7.19 | 6.47 |
| SEMA3D       | 5.12 | 4.54  | 5.29 | 7.13 | 4.45 | 4.81 | 8.73 | 7.03 |
| FAM177A1     | 4.18 | 4.36  | 4.47 | 4.96 | 4.92 | 4.82 | 5.71 | 5.42 |

|           |      |      |      |      |      |      |       |      |
|-----------|------|------|------|------|------|------|-------|------|
| HIST2H2AC | 3.59 | 3.91 | 4.66 | 3.91 | 2.94 | 4.83 | 2.6   | 3.64 |
| IL27RA    | 6.22 | 6.27 | 5.64 | 4.96 | 4.66 | 4.83 | 3.86  | 3.95 |
| ZBED3     | 4.63 | 4.88 | 4.23 | 4.39 | 4.75 | 4.83 | 4.2   | 4.01 |
| SPDYE3    | 3.83 | 3.87 | 4.04 | 4.71 | 4.52 | 4.83 | 4.93  | 4.43 |
| ZNF85     | 4.71 | 5.18 | 4.93 | 5.72 | 5.74 | 4.83 | 6.58  | 5.19 |
| GLB1L     | 5.61 | 6.01 | 6.1  | 5.92 | 5.57 | 4.83 | 6.2   | 5.38 |
| EIF2AK3   | 4.39 | 4.19 | 5.09 | 5.63 | 5.34 | 4.83 | 7.03  | 5.6  |
| CYLD      | 4.02 | 3.74 | 4.6  | 5.27 | 5.06 | 4.83 | 5.88  | 5.91 |
| ENTPD5    | 5.05 | 4.62 | 4.72 | 6.41 | 5.24 | 4.83 | 7.2   | 6.63 |
| TCAIM     | 4.97 | 4.25 | 5.33 | 6.3  | 6.47 | 4.83 | 7.6   | 6.8  |
| NBPF8     | 3.77 | 3.4  | 5.51 | 6.79 | 5.07 | 4.83 | 7.77  | 6.82 |
| REV3L     | 4.01 | 4.11 | 5.31 | 6.56 | 4.58 | 4.83 | 9.05  | 7.81 |
| CENPO     | 4.83 | 4.54 | 4.86 | 4.84 | 5.81 | 4.84 | 5.63  | 4.86 |
| PHF10     | 5.65 | 5.34 | 5.64 | 6.08 | 5.31 | 4.84 | 6.37  | 5.31 |
| TRIM45    | 4.33 | 4.24 | 4.21 | 5.32 | 4.51 | 4.84 | 4.94  | 5.61 |
| EPG5      | 4.12 | 4.04 | 4.65 | 5.18 | 4.71 | 4.84 | 6.1   | 5.66 |
| CHD9      | 4.26 | 3.91 | 5.15 | 6.53 | 4.63 | 4.84 | 9.93  | 8.4  |
| DQX1      | 3.59 | 3.87 | 4.17 | 3.81 | 4.89 | 4.85 | 4.83  | 5.94 |
| ZNF254    | 5.4  | 4.48 | 5.74 | 5.74 | 4.87 | 4.85 | 7.29  | 6.57 |
| DIS3      | 4.3  | 3.96 | 5.03 | 5.44 | 4.63 | 4.85 | 7.76  | 6.62 |
| BOD1L1    | 3.75 | 3.92 | 4.53 | 6.11 | 4.27 | 4.85 | 8.15  | 7.57 |
| STIL      | 5.09 | 3.75 | 5.46 | 6.2  | 4.97 | 4.86 | 7.11  | 5.85 |
| C2orf49   | 4.34 | 4.49 | 4.94 | 5.23 | 4.01 | 4.86 | 6.08  | 6.04 |
| ZNF174    | 4.76 | 5.15 | 4.72 | 4.97 | 4.54 | 4.87 | 4.47  | 4.43 |
| RPL22L1   | 3.93 | 4.33 | 3.62 | 5.14 | 4.71 | 4.87 | 6.27  | 5.34 |
| CEP120    | 4.55 | 4.02 | 5.18 | 6.07 | 4.6  | 4.87 | 8.27  | 6.69 |
| KCTD7     | 4.46 | 4.7  | 4.7  | 5.03 | 4.94 | 4.88 | 5.47  | 5    |
| VPS53     | 5.54 | 5.68 | 4.54 | 5.44 | 4.92 | 4.88 | 5.65  | 5.65 |
| ULBP3     | 4.85 | 4.81 | 4.98 | 5.4  | 4.57 | 4.88 | 5.18  | 5.81 |
| SH3D19    | 4.68 | 4.08 | 4.86 | 5.26 | 5.02 | 4.88 | 6.59  | 5.94 |
| TBCCD1    | 5.46 | 4.84 | 4.94 | 5.49 | 4.66 | 4.88 | 5.88  | 6.35 |
| SPINK5    | 3.79 | 3.67 | 4.19 | 5.82 | 4.37 | 4.88 | 7.78  | 7.43 |
| UPF2      | 4.23 | 3.96 | 5.23 | 6.42 | 5.69 | 4.88 | 9.08  | 7.66 |
| MAP7D3    | 4.15 | 3.24 | 5.03 | 5.3  | 4.9  | 4.89 | 6.59  | 6.03 |
| GPX8      | 4.79 | 5.12 | 6.26 | 6.62 | 5.05 | 4.89 | 7.5   | 6.6  |
| ARRDC4    | 4.42 | 4.29 | 5.02 | 4.93 | 5.23 | 4.89 | 6.86  | 6.82 |
| KMT2C     | 4.66 | 4.31 | 5.08 | 6.59 | 5.12 | 4.89 | 7.44  | 7.18 |
| MAP4K3    | 5.11 | 4.37 | 4.95 | 6.42 | 5.43 | 4.89 | 8.98  | 7.19 |
| RNPC3     | 4.44 | 4.19 | 4.66 | 5.02 | 6.22 | 4.89 | 9.17  | 8.53 |
| RAD51     | 5.75 | 4.88 | 5.65 | 5.17 | 5.9  | 4.9  | 4.95  | 4.44 |
| ZCCHC24   | 6.01 | 6.12 | 5.72 | 5.89 | 4.71 | 4.9  | 4.31  | 4.78 |
| NMI       | 4.56 | 5.31 | 5.57 | 6.84 | 4.54 | 4.9  | 5.92  | 4.96 |
| SRGAP3    | 4.08 | 4.87 | 4.13 | 5.08 | 4.59 | 4.9  | 5.11  | 5.1  |
| NUDT7     | 5.02 | 4.48 | 5.41 | 5.2  | 5.1  | 4.9  | 6.4   | 5.89 |
| ERI1      | 4.42 | 4.59 | 5.79 | 4.94 | 5.16 | 4.9  | 6.91  | 6.21 |
| RGS20     | 5.15 | 5.5  | 6.13 | 4.47 | 5.7  | 4.9  | 6.02  | 6.22 |
| CHORDC1   | 5.76 | 5.84 | 5.78 | 6.43 | 5.33 | 4.9  | 8.93  | 7.98 |
| FZD8      | 6.27 | 6.17 | 5.48 | 6.01 | 4.36 | 4.91 | 4.19  | 4.31 |
| LHX6      | 5.56 | 4.9  | 4.9  | 4.27 | 4.39 | 4.91 | 3.77  | 4.36 |
| TBC1D22B  | 4.31 | 4.5  | 4.99 | 4.54 | 4.45 | 4.91 | 4.61  | 4.56 |
| ANKMY1    | 4.2  | 4    | 3.94 | 4.27 | 5.03 | 4.91 | 5.11  | 4.68 |
| CREM      | 4.8  | 4.93 | 4.35 | 4.12 | 5.95 | 4.91 | 6.73  | 4.74 |
| CNNM2     | 5.15 | 4.75 | 4.33 | 4.41 | 5.28 | 4.91 | 4.75  | 4.85 |
| RNGTT     | 4.31 | 4.06 | 5.06 | 4.85 | 4.87 | 4.91 | 6.48  | 5.63 |
| ZCCHC4    | 3.74 | 4    | 4.7  | 4.53 | 5.06 | 4.91 | 6.5   | 5.73 |
| CCDC117   | 4.8  | 4.5  | 4.98 | 4.99 | 6.13 | 4.91 | 6.72  | 6.29 |
| SNAPC1    | 5.17 | 5.25 | 5.82 | 6.07 | 5.76 | 4.91 | 7.28  | 6.62 |
| SNX24     | 4.57 | 4.23 | 4.61 | 5.49 | 5.45 | 4.91 | 5.78  | 6.93 |
| MDP1      | 7.07 | 7.66 | 7.18 | 7.16 | 6.42 | 4.92 | 5.09  | 4.03 |
| SLC16A2   | 3.66 | 4.15 | 3.66 | 3.74 | 4.99 | 4.92 | 4.43  | 4.96 |
| VPS36     | 4.52 | 4.18 | 4.88 | 6    | 5.28 | 4.92 | 7.69  | 6.49 |
| CEP89     | 6.49 | 5.67 | 6.35 | 6.21 | 6.06 | 4.92 | 6.75  | 6.54 |
| AP5M1     | 4.52 | 4.05 | 4.59 | 5.92 | 5.18 | 4.92 | 8.59  | 7.19 |
| CYP2R1    | 4.8  | 4.78 | 5.51 | 5.62 | 5.17 | 4.93 | 7.68  | 5.92 |
| SPAG16    | 4.67 | 4.84 | 4.83 | 5.74 | 4.26 | 4.93 | 7.2   | 6.08 |
| KLHL20    | 5.22 | 4.2  | 4.83 | 6.45 | 5.46 | 4.93 | 7.84  | 6.34 |
| NBPF26    | 4.16 | 3.45 | 4.12 | 5.33 | 5.83 | 4.93 | 7.09  | 6.61 |
| PDS5B     | 4.51 | 3.86 | 5.35 | 5.83 | 5.07 | 4.93 | 7.9   | 6.61 |
| ACAP2     | 3.84 | 4.14 | 5.14 | 5.57 | 4.69 | 4.93 | 7.98  | 6.88 |
| DNMT3A    | 4.54 | 5.35 | 4.88 | 5.02 | 4.54 | 4.94 | 4.59  | 4.76 |
| ME1       | 4    | 3.55 | 4.01 | 4.7  | 5.06 | 4.94 | 6.27  | 5.63 |
| LYPD6     | 5.17 | 4.47 | 5.42 | 5.36 | 5.35 | 4.94 | 6.78  | 6.03 |
| SDHAF3    | 4.64 | 5.94 | 5.45 | 5.11 | 5.8  | 4.94 | 7.55  | 6.09 |
| GLCE      | 4.46 | 4.11 | 5.21 | 5.6  | 5.77 | 4.94 | 6.68  | 6.23 |
| TMEM184C  | 4.26 | 4.59 | 4.99 | 5.6  | 4.93 | 4.94 | 7.16  | 6.71 |
| SCGB1A1   | 2.08 | 3.24 | 1.74 | 2.37 | 4.71 | 4.95 | 3.15  | 4.01 |
| PNMA5     | 6.77 | 7.31 | 7.14 | 6.77 | 5.17 | 4.95 | 4.59  | 4.31 |
| METTL16   | 4.61 | 4.74 | 5.16 | 4.88 | 4.76 | 4.95 | 4.88  | 5.15 |
| HECTD4    | 4.87 | 4.4  | 4.67 | 5.16 | 4.64 | 4.95 | 5.52  | 5.26 |
| SLC18B1   | 4.54 | 3.61 | 4.64 | 4.66 | 4.8  | 4.95 | 6.05  | 5.71 |
| BRWD3     | 4.53 | 4.22 | 4.52 | 5.93 | 4.69 | 4.95 | 8.4   | 7.14 |
| THAP5     | 3.87 | 4.53 | 4.7  | 5.79 | 4.49 | 4.95 | 10.12 | 7.98 |
| ZFC3H1    | 4.16 | 3.95 | 4.76 | 6.24 | 4.81 | 4.95 | 9.07  | 8    |
| KAZALD1   | 5.9  | 5.51 | 5.24 | 4.7  | 4.63 | 4.96 | 4.28  | 3.98 |
| DERL2     | 3.91 | 4.34 | 4.36 | 4.72 | 5.03 | 4.96 | 5.05  | 4.58 |

|           |      |      |      |      |      |      |      |      |
|-----------|------|------|------|------|------|------|------|------|
| GPR176    | 3.72 | 3.86 | 4.26 | 3.88 | 4.69 | 4.96 | 4.09 | 4.75 |
| PPP1R13B  | 5.3  | 5.46 | 5.59 | 4.64 | 4.9  | 4.96 | 4.79 | 5.27 |
| SLC1A1    | 5.65 | 4.96 | 6.17 | 6.55 | 4.33 | 4.96 | 5.94 | 5.53 |
| DYRK1A    | 5.52 | 4.77 | 5.76 | 6.31 | 5.27 | 4.96 | 6.52 | 5.95 |
| FARP2     | 5.71 | 5.66 | 5.47 | 5.34 | 5.98 | 4.96 | 5.94 | 5.96 |
| TGFBR1    | 3.06 | 3.26 | 3.81 | 4.57 | 5.03 | 4.96 | 8.14 | 6.23 |
| SMARCAD1  | 4.12 | 3.52 | 4.46 | 5.41 | 4.97 | 4.96 | 8.41 | 7.68 |
| SOS1      | 4.34 | 4.07 | 5.51 | 6.5  | 5.6  | 4.96 | 8.97 | 8.16 |
| SWSAP1    | 5    | 4.23 | 4.49 | 4.23 | 5.5  | 4.97 | 4.34 | 4.34 |
| GATA2     | 4.79 | 4.96 | 4.52 | 4.78 | 4.49 | 4.97 | 3.77 | 4.61 |
| EMP2      | 4.44 | 4.51 | 4.7  | 5.02 | 4.77 | 4.97 | 4.86 | 4.84 |
| HEMK1     | 4.4  | 4.7  | 4.3  | 4.91 | 5.04 | 4.97 | 5.57 | 5.23 |
| TMEM234   | 5.76 | 4.69 | 4.88 | 4.41 | 6.44 | 4.97 | 4.32 | 5.3  |
| SKA1      | 4.22 | 3.75 | 4.38 | 5.58 | 5.06 | 4.97 | 6.06 | 5.33 |
| GNPDA2    | 3.93 | 4.08 | 4.05 | 5.27 | 4.43 | 4.97 | 7.04 | 5.8  |
| PACRGL    | 5.64 | 4.69 | 4.96 | 6.03 | 6.38 | 4.97 | 6.96 | 6.05 |
| LACTB     | 3.42 | 4.85 | 4.12 | 4.84 | 4.89 | 4.97 | 5.87 | 6.34 |
| ELP4      | 4.3  | 4.09 | 4.33 | 4.08 | 4.72 | 4.98 | 5.77 | 4.7  |
| NUDT9     | 4.03 | 4.71 | 4.71 | 5.19 | 4.99 | 4.98 | 6.55 | 4.7  |
| DENND3    | 3.56 | 3.54 | 3.92 | 4.11 | 5.26 | 4.98 | 5.13 | 4.8  |
| CA9       | 9.05 | 9.94 | 8.96 | 7.55 | 4.78 | 4.98 | 5.57 | 5.01 |
| CDH11     | 4.38 | 4.58 | 4.81 | 5.25 | 4.77 | 4.98 | 6.04 | 5.49 |
| PPTC7     | 4.29 | 3.75 | 4.71 | 4.62 | 4.56 | 4.98 | 5.77 | 5.71 |
| C17orf75  | 5.63 | 5.02 | 5.67 | 6.39 | 6.07 | 4.98 | 6.45 | 6.44 |
| MAML2     | 4.54 | 4.44 | 5.43 | 6.71 | 4.89 | 4.98 | 7.58 | 6.65 |
| PLCB1     | 4.31 | 4.31 | 5.32 | 5.57 | 4.98 | 4.98 | 8.1  | 6.95 |
| PIGK      | 4.27 | 4.65 | 4.43 | 5.13 | 5.42 | 4.98 | 8    | 7.01 |
| IFT80     | 3.89 | 4.15 | 4.39 | 5.96 | 5.21 | 4.98 | 9.49 | 7.59 |
| ACOT11    | 5.97 | 5.74 | 5.98 | 4.97 | 4.11 | 4.99 | 4.62 | 4.69 |
| PCDHGB5   | 5.31 | 6    | 5.74 | 5.64 | 4.22 | 4.99 | 4.38 | 4.95 |
| MAP1LC3B2 | 3.9  | 7.73 | 5.23 | 3.76 | 5.08 | 4.99 | 5.81 | 6.45 |
| CTAGE5    | 4.35 | 4.01 | 4.32 | 5.13 | 4.86 | 4.99 | 7.46 | 6.77 |
| C9orf85   | 3.66 | 3.41 | 4.27 | 4.96 | 4.76 | 4.99 | 7.91 | 7.23 |
| PPM1J     | 6.99 | 6.89 | 5.8  | 5.13 | 4.85 | 5    | 4.69 | 4.6  |
| TRMT12    | 4.12 | 4.3  | 4.25 | 4.3  | 4.23 | 5    | 4.67 | 5    |
| EFNA3     | 7.16 | 7.28 | 6.62 | 6.28 | 5.55 | 5    | 4.41 | 5.24 |
| E2F5      | 4.8  | 4.72 | 4.84 | 5.15 | 4.77 | 5    | 5.63 | 5.9  |
| BTN3A1    | 4.88 | 5.39 | 5.65 | 6.18 | 5.61 | 5    | 6.35 | 6.24 |
| FASTKD1   | 3.49 | 3.85 | 4.18 | 4.84 | 4.68 | 5    | 8.31 | 6.4  |
| DPH3P1    | 4.81 | 5.18 | 5.19 | 6.19 | 4.83 | 5    | 5.54 | 6.48 |
| DZIP3     | 4.3  | 3.84 | 4.85 | 5.56 | 4.99 | 5    | 8.85 | 7.55 |
| ZNF764    | 5.07 | 5.59 | 4.56 | 4.7  | 4.92 | 5.01 | 4.31 | 4.98 |
| STK36     | 4.02 | 4.23 | 4.46 | 4.7  | 4.59 | 5.01 | 5.37 | 5.5  |
| NPIPA7    | 5.14 | 4.67 | 5.66 | 6.4  | 5.98 | 5.01 | 7.5  | 5.63 |
| MED21     | 4.61 | 4.69 | 4.53 | 5.09 | 4.8  | 5.01 | 7.44 | 6.4  |
| TEFM      | 4.48 | 5.15 | 4.96 | 4.39 | 4.86 | 5.01 | 6.55 | 6.43 |
| DENND4C   | 4.4  | 4.19 | 5.98 | 6.61 | 5.06 | 5.01 | 8.82 | 6.86 |
| GJB5      | 3.98 | 5.32 | 3.92 | 3.89 | 3.69 | 5.02 | 3.15 | 3.51 |
| FARP1     | 5.37 | 5.29 | 5.41 | 5.06 | 5.41 | 5.02 | 4.54 | 4.63 |
| ARSB      | 4.58 | 4.78 | 4.77 | 5.4  | 4.98 | 5.02 | 5.17 | 4.99 |
| NUP35     | 3.77 | 3.62 | 4.68 | 5.16 | 4.63 | 5.02 | 6.03 | 5.09 |
| CXorf57   | 4.67 | 4.6  | 4.94 | 5.95 | 4.51 | 5.02 | 7.56 | 6.32 |
| DNAJC3    | 5.25 | 4.32 | 6.14 | 6.89 | 5.8  | 5.02 | 8.3  | 7.32 |
| REEP3     | 4.24 | 4.18 | 5.39 | 6.79 | 5.04 | 5.02 | 9.26 | 8.6  |
| ADCK1     | 3.67 | 3.77 | 3.82 | 3.77 | 3.75 | 5.03 | 4.03 | 3.73 |
| ADGRB2    | 6.09 | 5.92 | 5.59 | 5.84 | 4.47 | 5.03 | 3.85 | 4.42 |
| FAM86KP   | 5.83 | 2.81 | 4.57 | 4.19 | 3.84 | 5.03 | 5.16 | 4.44 |
| KBTBD11   | 4.24 | 3.25 | 4.06 | 3.81 | 4.72 | 5.03 | 5.13 | 4.59 |
| SMYD4     | 4.7  | 4.71 | 5.02 | 5.62 | 4.67 | 5.03 | 4.92 | 5    |
| DSE       | 3.3  | 3.4  | 4    | 4.41 | 5.08 | 5.03 | 6.66 | 5.79 |
| ATG16L2   | 3.76 | 3.4  | 3.7  | 3.66 | 5.5  | 5.03 | 6.81 | 5.91 |
| RNF217    | 5.5  | 4    | 5.36 | 6.49 | 4.61 | 5.03 | 6.66 | 6.18 |
| FBXO5     | 5.09 | 4.52 | 4.79 | 5.42 | 5.47 | 5.03 | 7.11 | 6.35 |
| PCNX4     | 5.21 | 4.58 | 5.6  | 6.54 | 5.37 | 5.03 | 8.63 | 6.93 |
| IMMP1L    | 6.1  | 4.82 | 4.54 | 5.12 | 6.56 | 5.03 | 6.37 | 7.41 |
| NAPRT     | 3.37 | 3.57 | 3.05 | 3.21 | 3.77 | 5.04 | 5.48 | 4.69 |
| ZNF576    | 4.73 | 4.78 | 4.9  | 4.45 | 5.35 | 5.04 | 4.03 | 4.95 |
| UBE3D     | 4.43 | 5.19 | 4.72 | 5.65 | 5.58 | 5.04 | 6.26 | 5.03 |
| PCDHGA4   | 5.01 | 4.66 | 5.13 | 4.86 | 4.4  | 5.04 | 4.88 | 5.41 |
| RWDD4     | 4.61 | 4.43 | 5    | 5.15 | 4.6  | 5.04 | 7.05 | 5.66 |
| POLR2M    | 4.37 | 4.49 | 4.5  | 4.78 | 5.03 | 5.04 | 6.66 | 5.7  |
| ERMARD    | 4.86 | 3.79 | 4.54 | 5.52 | 5.67 | 5.04 | 6.51 | 5.99 |
| PAPOLG    | 4.44 | 4.3  | 5.16 | 5.61 | 5.49 | 5.04 | 7.61 | 6.39 |
| MBIP      | 4.85 | 4.62 | 5.07 | 5.48 | 5.09 | 5.04 | 7.09 | 6.91 |
| GEMIN8    | 5.8  | 5.79 | 5.93 | 5.92 | 6.64 | 5.04 | 6.7  | 7.08 |
| SUSD2     | 3.95 | 3.6  | 4.24 | 3.29 | 5.24 | 5.05 | 4.15 | 4.58 |
| RAB28     | 5.68 | 5.99 | 5.25 | 5.82 | 5.36 | 5.05 | 6.44 | 6.25 |
| CKAP2L    | 3.7  | 3.39 | 4.22 | 5.13 | 4.86 | 5.05 | 9.21 | 6.95 |
| CCDC91    | 4.52 | 4.48 | 4.87 | 5.34 | 5.41 | 5.05 | 8.38 | 7.66 |
| SMAD6     | 5.37 | 5.45 | 5.65 | 5.25 | 4.66 | 5.06 | 4.47 | 4.1  |
| SHROOM1   | 5.15 | 5.09 | 4.89 | 4.45 | 5.01 | 5.06 | 3.91 | 4.7  |
| DEF6      | 5.96 | 5.79 | 6.57 | 5.21 | 4.99 | 5.06 | 4.03 | 4.76 |
| PCNT      | 4.45 | 4.18 | 4.97 | 5.03 | 5.14 | 5.06 | 6.1  | 5.72 |
| THUMPD2   | 3.42 | 3.45 | 4.19 | 4.9  | 5.57 | 5.06 | 7.15 | 5.85 |

|           |      |      |      |      |      |      |      |      |
|-----------|------|------|------|------|------|------|------|------|
| PNPLA8    | 4.6  | 5.12 | 4.82 | 5.51 | 5.46 | 5.06 | 8.65 | 7.14 |
| TLK1      | 4.38 | 4.24 | 5.21 | 6.67 | 5.34 | 5.06 | 8    | 7.19 |
| ZNF644    | 6.26 | 6.06 | 6    | 6.65 | 5.45 | 5.06 | 9.61 | 7.37 |
| ARL14EP   | 6.05 | 5.8  | 5.75 | 6.76 | 5.56 | 5.06 | 9.26 | 7.81 |
| NIPBL     | 4.89 | 4.41 | 5.65 | 6.99 | 4.8  | 5.06 | 9.77 | 8.27 |
| MPHOSPH9  | 4.48 | 4.06 | 4.98 | 6.01 | 4.65 | 5.06 | 9.16 | 8.3  |
| BMI1      | 5.55 | 5.86 | 6.18 | 8.04 | 7.21 | 5.06 | 7.75 | 9.5  |
| SAA1      | 4.29 | 3.96 | 5.56 | 2.89 | 7.4  | 5.07 | 6.45 | 4.56 |
| EEF1AKMT1 | 4.62 | 4.01 | 4.4  | 5.32 | 4.36 | 5.07 | 5.93 | 4.86 |
| PIAS2     | 4.82 | 4.51 | 5.29 | 5.61 | 5.02 | 5.07 | 6.72 | 5.98 |
| RNF138    | 5.45 | 5.41 | 5.45 | 5.67 | 5.39 | 5.07 | 6.53 | 6.2  |
| MLLT10    | 5.18 | 4.32 | 5.3  | 5.7  | 5.7  | 5.07 | 7.75 | 7.62 |
| TTL4      | 4.87 | 5.26 | 5.12 | 5.16 | 4.86 | 5.08 | 5.23 | 5.55 |
| RNF111    | 5.65 | 5.03 | 5.49 | 5.95 | 5.26 | 5.08 | 6.39 | 5.65 |
| SCFD2     | 5.86 | 6.78 | 6.34 | 5.81 | 7.37 | 5.08 | 6    | 5.84 |
| NT5DC3    | 4.39 | 4.05 | 4.36 | 4.86 | 5.27 | 5.08 | 6.62 | 6.25 |
| RALGPS2   | 4.41 | 4.69 | 4.82 | 5.68 | 5.25 | 5.08 | 7.25 | 7.05 |
| NFKB1     | 5.11 | 4.72 | 5.22 | 5.37 | 5.28 | 5.1  | 5.65 | 4.89 |
| BRAP      | 5.01 | 4.73 | 5.07 | 5.3  | 5.22 | 5.1  | 6.23 | 5.72 |
| PTPRG     | 4.88 | 4.48 | 5.16 | 6.07 | 4.56 | 5.1  | 6.23 | 6.12 |
| GSKIP     | 4.46 | 4.29 | 4.89 | 5.36 | 5.88 | 5.1  | 7.79 | 6.61 |
| STRN3     | 5.22 | 4.38 | 5.78 | 6.74 | 5.53 | 5.1  | 8.84 | 7.38 |
| APOOL     | 4.17 | 3.99 | 3.77 | 4.43 | 4.09 | 5.11 | 6.15 | 5.8  |
| OSGEPL1   | 4.04 | 4.07 | 3.99 | 4.84 | 5.21 | 5.11 | 6.54 | 5.89 |
| MMD       | 5.28 | 5.44 | 5.87 | 6.64 | 5.15 | 5.11 | 6.68 | 6.35 |
| EGR1      | 8.98 | 8.27 | 8.37 | 8.61 | 5.4  | 5.12 | 5.86 | 5.15 |
| RBMXL1    | 4.07 | 3.95 | 4.63 | 5.29 | 4.71 | 5.12 | 6.73 | 5.48 |
| BCL2L11   | 5.61 | 5.3  | 6.24 | 5.81 | 5.54 | 5.12 | 5.36 | 5.71 |
| DCK       | 4.5  | 4.58 | 4.75 | 5.5  | 5.68 | 5.12 | 7.26 | 5.72 |
| PARM1     | 6.14 | 5.86 | 5.68 | 6.92 | 4.6  | 5.12 | 5.7  | 5.79 |
| MSL2      | 6.11 | 5.93 | 6.48 | 6.45 | 6.38 | 5.12 | 7.12 | 6.32 |
| SGPP1     | 5.17 | 4.92 | 5.74 | 5.99 | 5.36 | 5.12 | 6.32 | 6.47 |
| ZBTB33    | 4.5  | 3.87 | 5.47 | 6.14 | 5.5  | 5.12 | 8.56 | 7.24 |
| TRIB1     | 4.84 | 5.58 | 5.37 | 5.44 | 5.05 | 5.13 | 5.76 | 5.01 |
| CTPS2     | 5.14 | 4.59 | 4.78 | 5.54 | 5.11 | 5.13 | 5.49 | 5.08 |
| TTC23     | 5.14 | 4.85 | 4.87 | 4.99 | 4.72 | 5.13 | 5.94 | 5.24 |
| C19orf44  | 4.86 | 5.34 | 5.1  | 5.78 | 5.34 | 5.13 | 5.46 | 5.33 |
| BTN3A2    | 4.63 | 4.73 | 4.9  | 5.22 | 5.54 | 5.13 | 5.43 | 5.55 |
| SIK3      | 4.93 | 5.02 | 4.82 | 5.31 | 5.29 | 5.13 | 4.91 | 5.89 |
| IFIT2     | 5.6  | 5.77 | 6.3  | 7.43 | 4.98 | 5.13 | 6.42 | 6.4  |
| C1orf27   | 4.01 | 3.72 | 3.82 | 4.65 | 5.41 | 5.13 | 8.72 | 6.44 |
| MLPH      | 5.23 | 5.09 | 4.99 | 5.19 | 5    | 5.14 | 4.86 | 4.93 |
| THG1L     | 5.94 | 5.54 | 5.79 | 6    | 4.83 | 5.14 | 5.32 | 5.02 |
| FAM105A   | 2.87 | 3.36 | 3.46 | 3.7  | 4.85 | 5.14 | 6.11 | 5.75 |
| ATP11A    | 5.02 | 5.02 | 5.25 | 5.27 | 5.23 | 5.14 | 5.72 | 5.89 |
| ANGEL2    | 5.46 | 4.88 | 5.33 | 5.73 | 5.49 | 5.14 | 7.81 | 7.64 |
| UFSP1     | 4.71 | 5.11 | 5.16 | 4.42 | 4.54 | 5.15 | 2.72 | 3.97 |
| TBKBP1    | 5.59 | 6.07 | 5.83 | 5.72 | 5.05 | 5.15 | 4.2  | 4.51 |
| CPQ       | 5.43 | 6.04 | 5.28 | 5.08 | 5.1  | 5.15 | 5.55 | 4.66 |
| MTHFS     | 5.01 | 5.6  | 5.6  | 5.21 | 5.15 | 5.15 | 4.86 | 5.01 |
| FBXO45    | 4.25 | 3.79 | 4.37 | 4.87 | 4.96 | 5.15 | 6.15 | 5.09 |
| EXO1      | 5.55 | 4.84 | 5.97 | 6.02 | 5.11 | 5.15 | 6.92 | 5.29 |
| TAF1      | 4.94 | 4.95 | 6.26 | 6.44 | 5.34 | 5.15 | 8.14 | 6.88 |
| DPYD      | 5.34 | 4.34 | 5.46 | 5.8  | 5.64 | 5.15 | 8.23 | 7.01 |
| PCOLCE    | 5.8  | 4.68 | 4.8  | 5.57 | 4.45 | 5.15 | 4.76 | 5.1  |
| PDE12     | 3.87 | 3.97 | 4.09 | 5.17 | 4.84 | 5.16 | 5.89 | 5.34 |
| CPS1      | 5.66 | 6.02 | 5.97 | 6.06 | 4.9  | 5.16 | 6.1  | 6.43 |
| RABL3     | 4.21 | 3.99 | 4.58 | 5.38 | 5.01 | 5.16 | 8.4  | 6.46 |
| UBR3      | 3.89 | 3.97 | 4.19 | 5.72 | 4.97 | 5.16 | 6.81 | 6.6  |
| PAPSS2    | 5.56 | 5.1  | 5.54 | 5.66 | 5.13 | 5.17 | 5.42 | 4.92 |
| ADAM19    | 6.47 | 6.83 | 5.99 | 6.7  | 4.98 | 5.17 | 5.05 | 5.42 |
| SIPA1L1   | 5.51 | 5.53 | 5.79 | 5.77 | 5.4  | 5.17 | 6.03 | 5.7  |
| SH3BP5    | 4.74 | 4.91 | 4.87 | 6.14 | 6.36 | 5.17 | 6.45 | 6.1  |
| FIGNL1    | 4.67 | 4.13 | 5.68 | 6.28 | 5.48 | 5.17 | 8.65 | 7.27 |
| SFXN5     | 4.67 | 5.04 | 5.33 | 4.71 | 4.96 | 5.18 | 4.85 | 5.55 |
| RNF38     | 4.75 | 4.78 | 5.32 | 6.06 | 5.64 | 5.18 | 7.24 | 6.3  |
| TADA2B    | 4.57 | 5.1  | 4.81 | 4.76 | 5.35 | 5.19 | 4.73 | 5.02 |
| DSCC1     | 4.55 | 4.37 | 5.08 | 5.04 | 5.4  | 5.19 | 7.36 | 5.98 |
| DLX1      | 4.67 | 4.57 | 4.19 | 4.24 | 4.77 | 5.2  | 5.74 | 5.45 |
| C12orf43  | 5.22 | 5.23 | 5.62 | 4.98 | 5.61 | 5.2  | 5.24 | 5.48 |
| STX2      | 4.59 | 4.36 | 4.95 | 5.48 | 5.9  | 5.2  | 8.21 | 6.09 |
| TTC13     | 5.32 | 4.62 | 5.63 | 5.66 | 5.67 | 5.2  | 8.27 | 6.72 |
| NADK2     | 4.31 | 4.47 | 4.99 | 5.59 | 5.36 | 5.2  | 8.45 | 6.91 |
| CHML      | 4.52 | 4.14 | 5.41 | 6.01 | 5.46 | 5.2  | 9.6  | 7.57 |
| INPP1     | 4.92 | 5.02 | 4.75 | 4.36 | 5.97 | 5.21 | 5.3  | 4.79 |
| COQ7      | 4.74 | 5.3  | 5.33 | 5.69 | 5.55 | 5.21 | 5.23 | 5.13 |
| C3orf38   | 4.98 | 4.52 | 5.01 | 5.55 | 5.61 | 5.22 | 6.97 | 6.02 |
| TACC1     | 4.65 | 4.37 | 5.2  | 5.74 | 5.28 | 5.22 | 6.89 | 6.42 |
| STK3      | 4.97 | 4.66 | 5.08 | 5.87 | 6.01 | 5.22 | 7.89 | 7.05 |
| ST20      | 4.76 | 3.1  | 3.98 | 4.6  | 4.12 | 5.23 | 5.35 | 4.5  |
| NGEF      | 5.89 | 6.48 | 6.32 | 5.63 | 5.26 | 5.23 | 4.57 | 4.97 |
| SNX1      | 5.63 | 5.26 | 5.68 | 6.25 | 5.71 | 5.23 | 6.67 | 5.88 |
| FOXF2     | 3.84 | 4    | 4.21 | 4.73 | 4.41 | 5.24 | 3.76 | 3.74 |
| TSSK6     | 5.27 | 4.63 | 5.48 | 4.28 | 4.16 | 5.24 | 3.78 | 3.84 |
| B4GALT4   | 4.64 | 4.75 | 5.37 | 5.31 | 5.18 | 5.24 | 6.79 | 5.37 |
| RABGAP1L  | 3.89 | 3.75 | 4.76 | 5.15 | 4.73 | 5.24 | 6.71 | 6.71 |

|            |      |      |      |      |      |      |       |      |
|------------|------|------|------|------|------|------|-------|------|
| RBPJ       | 5.79 | 5.62 | 5.97 | 6.73 | 5.81 | 5.24 | 7.17  | 7.02 |
| NEDD1      | 5.29 | 5.93 | 5.87 | 6.79 | 5.81 | 5.24 | 9.58  | 7.91 |
| MRGPRX3    | 3.78 | 4.37 | 4.87 | 5.12 | 4.4  | 5.25 | 3.89  | 4.28 |
| DNER       | 2.81 | 3.03 | 2.61 | 2.76 | 5.12 | 5.25 | 6.01  | 5.58 |
| LRRC1      | 5.24 | 4.92 | 5.54 | 5.12 | 5.22 | 5.25 | 6.48  | 6.09 |
| TRIM38     | 6.09 | 5.41 | 5.6  | 6.19 | 5.03 | 5.25 | 7.19  | 6.15 |
| PCDHB10    | 7.55 | 6.41 | 7.19 | 8.81 | 6.22 | 5.25 | 6.66  | 6.37 |
| ZNF71      | 5.25 | 5.82 | 5.67 | 4.8  | 5.3  | 5.27 | 4.15  | 4.87 |
| PPM1M      | 5.68 | 5.38 | 4.57 | 5.28 | 5.22 | 5.27 | 5.11  | 4.94 |
| HSD17B11   | 5.77 | 5.15 | 5.07 | 5.26 | 5.47 | 5.27 | 6.14  | 5.74 |
| TEP1       | 4.64 | 4.86 | 4.8  | 5.44 | 5.31 | 5.27 | 5.7   | 5.8  |
| RAD52      | 4.64 | 4    | 4.17 | 4.95 | 5.12 | 5.27 | 7.1   | 5.99 |
| HOXB6      | 4.6  | 4.31 | 3.89 | 4.65 | 4.17 | 5.28 | 5.26  | 4.24 |
| PRTFDC1    | 4.84 | 4.38 | 4.58 | 4.77 | 5.23 | 5.28 | 6.42  | 5.32 |
| CENPA      | 4.17 | 3.31 | 2.97 | 3.42 | 4.69 | 5.28 | 5.27  | 5.44 |
| C2orf42    | 6.05 | 5.38 | 5    | 5.85 | 5.2  | 5.28 | 6.14  | 5.82 |
| GANC       | 4.39 | 4.24 | 4.6  | 5.64 | 5.06 | 5.28 | 6.21  | 6.16 |
| ACADS      | 5.44 | 6.27 | 5.44 | 4.56 | 5.71 | 5.29 | 3.52  | 3.75 |
| TSPYL2     | 5.5  | 6.1  | 5.57 | 5.93 | 5.13 | 5.29 | 4.96  | 5.62 |
| RDH10      | 4.06 | 3.92 | 4.29 | 5    | 5.02 | 5.29 | 6.74  | 5.85 |
| CXADR      | 3.89 | 3.57 | 4.69 | 5.37 | 3.64 | 5.29 | 6.35  | 6.18 |
| ZNF134     | 5.11 | 4.86 | 6.01 | 5.89 | 5.74 | 5.29 | 6.88  | 6.25 |
| PPAT       | 4.39 | 4.11 | 5.09 | 5.87 | 5.84 | 5.29 | 9.41  | 7.41 |
| ZNF883     | 5.11 | 4.99 | 5.59 | 6.38 | 5.07 | 5.29 | 9.59  | 8.07 |
| HIST2H2AA3 | 5.27 | 5.24 | 4.68 | 5.29 | 4.22 | 5.3  | 4.41  | 4.07 |
| HIST2H2AA4 | 5.27 | 5.24 | 4.68 | 5.29 | 4.22 | 5.3  | 4.41  | 4.07 |
| IL11RA     | 5.74 | 5.29 | 5.83 | 5.41 | 4.66 | 5.3  | 4.58  | 4.54 |
| RBKS       | 5.82 | 6.25 | 5.94 | 5.16 | 5.92 | 5.3  | 4.83  | 5.51 |
| TUBGCP3    | 5.56 | 5.19 | 5.34 | 5.82 | 5.45 | 5.3  | 5.59  | 5.58 |
| SUDS3      | 5    | 5.39 | 5.35 | 5.64 | 5.46 | 5.3  | 6.44  | 6.43 |
| ZC3H10     | 4.51 | 4.89 | 4.19 | 4.55 | 5.19 | 5.31 | 3.8   | 4.75 |
| SEC22A     | 4.63 | 4.34 | 4.68 | 5    | 5.54 | 5.32 | 6.68  | 5.14 |
| E2F6       | 5.2  | 4.64 | 5.44 | 5.62 | 6.17 | 5.32 | 6.36  | 5.35 |
| TMEM107    | 5.5  | 4.91 | 5.75 | 5.28 | 5.47 | 5.32 | 5.61  | 5.55 |
| SCYL2      | 4.97 | 4.44 | 5.45 | 5.98 | 5.58 | 5.32 | 8.92  | 7.02 |
| ETAA1      | 5.78 | 5.8  | 6.43 | 6.27 | 5.64 | 5.32 | 8.52  | 7.07 |
| ACTR6      | 4.2  | 5.05 | 4.99 | 4.93 | 5.56 | 5.32 | 8.33  | 7.11 |
| INPP5F     | 4.37 | 3.98 | 5    | 5.21 | 5.19 | 5.32 | 7.51  | 7.15 |
| ZNF528     | 4.38 | 4.82 | 5.52 | 6.94 | 4.86 | 5.32 | 8.13  | 7.22 |
| FAM72B     | 5.17 | 3.73 | 4.48 | 5.53 | 5.53 | 5.32 | 7.39  | 7.25 |
| ANKRD50    | 4.54 | 3.78 | 4.58 | 6.15 | 5.31 | 5.32 | 8.44  | 7.42 |
| RPAP2      | 4.91 | 4.05 | 5.65 | 6.27 | 5.19 | 5.32 | 8.1   | 7.7  |
| PTAR1      | 4.1  | 4.54 | 5.72 | 5.89 | 4.64 | 5.32 | 9.01  | 8.74 |
| AP3S2      | 4.47 | 4.05 | 3.74 | 3.85 | 5.29 | 5.33 | 4.53  | 4.92 |
| UBOX5      | 6.18 | 6.16 | 5.83 | 5.57 | 5.41 | 5.33 | 4.77  | 5.38 |
| INVS       | 4.67 | 4.8  | 4.82 | 5.66 | 4.89 | 5.33 | 6.32  | 6.02 |
| RNF214     | 5.06 | 5.03 | 6.28 | 5.36 | 5.43 | 5.33 | 6.59  | 6.06 |
| TMEM64     | 4.42 | 4.58 | 5.09 | 5.37 | 5.44 | 5.33 | 6.6   | 6.07 |
| PRKAB2     | 3.85 | 4.23 | 4.9  | 5.41 | 6.02 | 5.33 | 8.1   | 6.77 |
| TAF1A      | 4.81 | 4.26 | 6.01 | 6.77 | 5.51 | 5.33 | 8.51  | 7    |
| EHBP1      | 5.5  | 4.61 | 5.61 | 6.3  | 5.67 | 5.33 | 8.94  | 7.33 |
| KCNS3      | 5.77 | 6.88 | 6.3  | 6.54 | 4.45 | 5.34 | 5.16  | 5.44 |
| CXorf40A   | 5.71 | 4.87 | 5.24 | 5.72 | 6.06 | 5.34 | 5.67  | 5.45 |
| KLHL13     | 4.83 | 4.33 | 5.38 | 5.97 | 5.68 | 5.34 | 6.4   | 5.65 |
| MDN1       | 4.51 | 4.12 | 4.81 | 5.17 | 5.65 | 5.34 | 7.28  | 6.07 |
| CDC14B     | 4.91 | 4.77 | 5.68 | 6.32 | 5.84 | 5.34 | 7.52  | 6.8  |
| ZNF821     | 5.31 | 5.47 | 6.56 | 5.09 | 5.45 | 5.35 | 4.88  | 5.22 |
| FAM49A     | 3.87 | 3.91 | 4.03 | 3.9  | 5.56 | 5.35 | 6.21  | 5.41 |
| IFT172     | 5.41 | 5.48 | 5.53 | 5.46 | 5.26 | 5.35 | 5.67  | 5.42 |
| TOE1       | 5    | 4.36 | 4.49 | 5.12 | 6.08 | 5.35 | 5.41  | 5.58 |
| PLAUR      | 6.22 | 6.56 | 7.34 | 5.79 | 5.32 | 5.35 | 6.85  | 6.1  |
| UMAD1      | 5.08 | 5.13 | 5.29 | 6.36 | 6.31 | 5.35 | 8.19  | 6.74 |
| KLHL25     | 5.14 | 5.41 | 4.9  | 4.8  | 5.49 | 5.36 | 4.18  | 4.8  |
| ABLIM3     | 5.69 | 6.12 | 5.83 | 5.84 | 4.59 | 5.36 | 4.63  | 4.96 |
| OPA3       | 4.93 | 4.72 | 4.68 | 4.99 | 4.95 | 5.36 | 4.73  | 5.22 |
| SNIP1      | 6.16 | 5.62 | 5.65 | 5.79 | 5.74 | 5.36 | 6.07  | 5.94 |
| CHST7      | 4.44 | 4.36 | 3.61 | 3.67 | 4.7  | 5.37 | 4.02  | 3.65 |
| MAP6D1     | 4.88 | 5.61 | 5.34 | 4.92 | 4.46 | 5.37 | 3.89  | 4.2  |
| ZNF696     | 4.94 | 4.65 | 4.76 | 5.19 | 4.33 | 5.37 | 4.69  | 4.91 |
| CENPK      | 3.75 | 5.09 | 4.29 | 4.76 | 4.5  | 5.37 | 8.03  | 5.2  |
| ABHD3      | 5.41 | 5.58 | 5.6  | 5.44 | 4.78 | 5.37 | 7.97  | 5.58 |
| C5orf30    | 4.66 | 4.36 | 4.79 | 5.68 | 5.2  | 5.37 | 6.65  | 5.69 |
| ZADH2      | 5.03 | 4.64 | 5.37 | 5.6  | 5.41 | 5.37 | 6.62  | 6.22 |
| PTGR2      | 5.78 | 4.89 | 5.97 | 7.31 | 6.01 | 5.37 | 9.55  | 7.43 |
| AKAP9      | 4.29 | 4.37 | 5.02 | 5.57 | 4.97 | 5.37 | 9.5   | 8.18 |
| SNX13      | 4.75 | 4.14 | 5.44 | 6.89 | 5.43 | 5.37 | 10.43 | 8.6  |
| RBPMS      | 5.73 | 5    | 5.09 | 5.06 | 5.62 | 5.38 | 4.03  | 5.05 |
| BAG2       | 4.6  | 4.61 | 4.82 | 5.19 | 5.01 | 5.38 | 6.42  | 5.91 |
| ZNF330     | 4.79 | 5.84 | 5.97 | 6.73 | 6.2  | 5.38 | 6.56  | 6.51 |
| REPS2      | 5.65 | 5.62 | 7.12 | 5.86 | 5.69 | 5.38 | 6.04  | 6.57 |
| FAM8A1     | 4.69 | 4.53 | 4.94 | 5.53 | 4.59 | 5.38 | 6.89  | 6.66 |
| C9orf40    | 5.06 | 4.67 | 4.96 | 4.9  | 4.77 | 5.39 | 4.94  | 4.6  |
| DDI2       | 4.2  | 3.7  | 4.22 | 5.33 | 4.28 | 5.39 | 5.46  | 5.78 |
| OMA1       | 4.66 | 5.15 | 5.5  | 5.72 | 6.35 | 5.39 | 7.32  | 5.85 |
| HMGXB4     | 5.65 | 4.95 | 5.85 | 6.16 | 6.1  | 5.39 | 6.58  | 6.58 |
| C6orf203   | 5.58 | 5.27 | 5.75 | 5.51 | 6.23 | 5.39 | 8.21  | 6.58 |

|               |      |      |      |      |      |      |       |      |
|---------------|------|------|------|------|------|------|-------|------|
| FAM84B        | 4.96 | 5.23 | 6.32 | 7.38 | 5.87 | 5.39 | 6.77  | 6.7  |
| LOC102724985  | 4.98 | 5.79 | 5.34 | 5.58 | 6.97 | 5.39 | 6.58  | 6.93 |
| CCSER2        | 3.93 | 4.31 | 4.91 | 6.39 | 6.42 | 5.39 | 7.75  | 8.67 |
| FAM101A       | 6.61 | 7.68 | 5.93 | 6.23 | 3.51 | 5.4  | 4.29  | 3.9  |
| GLTSCR1       | 6.22 | 5.73 | 5.66 | 5.39 | 5    | 5.4  | 4.13  | 4.7  |
| CES3          | 6.26 | 5.69 | 5.82 | 6.38 | 5.25 | 5.4  | 6.01  | 5.16 |
| LBHD1         | 3.63 | 4.35 | 4.61 | 4.59 | 5.83 | 5.4  | 6.51  | 5.2  |
| LDHD          | 4.32 | 6.11 | 5.01 | 4.53 | 5.05 | 5.4  | 4.23  | 5.43 |
| CLPX          | 4.24 | 3.95 | 4.68 | 5.28 | 5.07 | 5.4  | 6.63  | 6.04 |
| PATJ          | 5.42 | 4.85 | 5.53 | 5.8  | 5.58 | 5.4  | 6.85  | 6.75 |
| FAM204A       | 4.78 | 4.79 | 5.48 | 5.82 | 6.08 | 5.4  | 8.2   | 6.95 |
| PBDC1         | 5.63 | 4.82 | 4.99 | 4.8  | 4.65 | 5.41 | 6.32  | 5.54 |
| JMJD7-PLA2G4B | 3.8  | 3.09 | 2.57 | 4.87 | 3.14 | 5.41 | 5.6   | 6.44 |
| PAXBP1        | 4.47 | 4.32 | 5.12 | 6.41 | 5.09 | 5.41 | 8.03  | 7.16 |
| TRMO          | 3.72 | 3.76 | 3.61 | 3.99 | 5.23 | 5.42 | 6.17  | 4.64 |
| METTL12       | 4.78 | 5.02 | 5.25 | 5.14 | 5.8  | 5.42 | 5.15  | 5.39 |
| KDM6B         | 6.51 | 6.54 | 6.86 | 6.69 | 5.15 | 5.42 | 4.82  | 5.78 |
| UMPS          | 4.77 | 4.46 | 5.29 | 4.98 | 5.51 | 5.42 | 6.03  | 5.81 |
| PTCD2         | 4.57 | 4.09 | 4.21 | 5.24 | 5.75 | 5.42 | 6.2   | 5.83 |
| BMPRI1A       | 5.01 | 4.31 | 5.64 | 5.82 | 5.52 | 5.42 | 7.19  | 6.37 |
| GEMIN2        | 4.95 | 4.63 | 5.12 | 5.63 | 4.92 | 5.42 | 7.06  | 6.45 |
| FAM114A2      | 5.4  | 5.64 | 6.29 | 6.61 | 6.8  | 5.42 | 8.5   | 7.21 |
| ARFIP1        | 5.12 | 4.48 | 5.49 | 6.91 | 6.12 | 5.42 | 8.5   | 7.23 |
| NABP1         | 3.46 | 3.72 | 4.57 | 4.78 | 4.79 | 5.42 | 9.59  | 7.24 |
| SFR1          | 4.95 | 5.39 | 6.4  | 6.52 | 6.57 | 5.42 | 10.52 | 7.75 |
| CHAMP1        | 5.35 | 5.2  | 6.11 | 5.73 | 5    | 5.43 | 5.79  | 5.63 |
| PAQR3         | 4.61 | 4.12 | 4.62 | 5.28 | 4.98 | 5.43 | 7.38  | 5.66 |
| SPA17         | 5.08 | 5.71 | 4.37 | 5.58 | 4.88 | 5.44 | 4.83  | 5.3  |
| ZNF142        | 5.79 | 5.73 | 5.92 | 5.56 | 5.42 | 5.44 | 5.58  | 5.43 |
| PDE8A         | 5.49 | 4.17 | 5.41 | 5.2  | 5.6  | 5.44 | 6.77  | 6.06 |
| KIAA0232      | 5.09 | 4.26 | 5.5  | 6.04 | 4.98 | 5.44 | 7.29  | 6.2  |
| MIS18A        | 4.99 | 5.35 | 6.18 | 5.98 | 6.56 | 5.44 | 6.58  | 6.49 |
| PIAS1         | 6.03 | 5.62 | 6.37 | 7.27 | 6.19 | 5.44 | 8.06  | 7.4  |
| C9orf172      | 5.35 | 5    | 4.95 | 4.67 | 4.48 | 5.45 | 4.43  | 3.95 |
| ZNF79         | 4.41 | 3.75 | 4.66 | 5.05 | 5.24 | 5.45 | 5.47  | 5.3  |
| TRIM16        | 5.41 | 5.34 | 5.46 | 4.41 | 5.1  | 5.45 | 5.8   | 5.43 |
| CENPU         | 5.27 | 4.75 | 5.31 | 6.42 | 5.96 | 5.45 | 8.74  | 6.66 |
| TRIM2         | 5.15 | 4.82 | 4.94 | 5.82 | 4.12 | 5.46 | 5.46  | 5.65 |
| NR2C1         | 4.73 | 5.7  | 5.33 | 6.42 | 4.82 | 5.46 | 7.81  | 5.87 |
| TLL1          | 5.5  | 6.47 | 5.69 | 6.25 | 5.25 | 5.46 | 5.31  | 6.07 |
| ASB8          | 5.78 | 5.81 | 6.33 | 6.8  | 6.66 | 5.46 | 6.87  | 6.28 |
| ZBTB25        | 4.87 | 4.28 | 5    | 5.83 | 5.2  | 5.46 | 6.97  | 6.64 |
| STK32A        | 4.83 | 4.38 | 4.95 | 6.07 | 5.79 | 5.46 | 7.64  | 7.06 |
| MCTP1         | 4.38 | 4.49 | 4.98 | 5.66 | 5.58 | 5.46 | 9.11  | 7.72 |
| RASA4B        | 6.66 | 6.97 | 6.22 | 7.37 | 5.14 | 5.47 | 4.81  | 5.09 |
| RBSN          | 5.43 | 5.73 | 5.78 | 5.65 | 5.36 | 5.47 | 5.41  | 5.5  |
| COQ10B        | 4.99 | 3.98 | 5.46 | 6.16 | 5.1  | 5.47 | 8.53  | 6.88 |
| AQP10         | 5.03 | 4.46 | 5.19 | 4.68 | 4.46 | 5.48 | 3.8   | 4.43 |
| CRAMP1        | 5.01 | 4.88 | 5.28 | 5.24 | 5.25 | 5.48 | 5.79  | 5.84 |
| EPB41         | 4.75 | 5.1  | 4.96 | 5.59 | 5.38 | 5.48 | 6.56  | 5.9  |
| FKBPL         | 4.95 | 4.59 | 4.19 | 3.54 | 5.26 | 5.48 | 5.06  | 4.67 |
| JUN           | 8.18 | 7.49 | 7.21 | 7.22 | 5.79 | 5.49 | 4.83  | 4.73 |
| FBXO6         | 6.15 | 6.38 | 7.17 | 6.4  | 5.42 | 5.49 | 4.77  | 4.9  |
| GPD2          | 5.61 | 4.35 | 5.79 | 6.82 | 5.79 | 5.49 | 8.18  | 6.72 |
| RPAP3         | 4.75 | 4.51 | 5.83 | 6.91 | 5.64 | 5.49 | 10.18 | 7.94 |
| ACBD5         | 4.46 | 4.12 | 5.66 | 6.89 | 6.11 | 5.49 | 9     | 8.15 |
| MTRNR2L9      | 6.3  | 3.49 | 4.8  | 3.87 | 5.31 | 5.5  | 2.62  | 3.78 |
| HOXB4         | 4.67 | 4.84 | 4.46 | 4.82 | 4.66 | 5.5  | 3.41  | 5.36 |
| WHRN          | 5.53 | 5.23 | 5.32 | 5.67 | 4.66 | 5.5  | 4.95  | 5.53 |
| URB2          | 4.95 | 4.68 | 5.27 | 5.01 | 5.27 | 5.51 | 5.34  | 5.41 |
| DNAJC15       | 6.12 | 6.15 | 6.5  | 6.33 | 5.47 | 5.51 | 6.57  | 5.41 |
| PIK3CD        | 5.38 | 5.72 | 5.42 | 5.51 | 5.58 | 5.51 | 5.53  | 5.59 |
| UBA5          | 4.72 | 4.42 | 6.03 | 6.16 | 4.86 | 5.51 | 8.24  | 7.16 |
| NBPF9         | 3.63 | 4.59 | 5.48 | 5.15 | 5.68 | 5.51 | 8.6   | 7.3  |
| DBT           | 4.11 | 3.52 | 4.41 | 6.18 | 5.44 | 5.51 | 9.36  | 7.53 |
| ATXN7L2       | 4.8  | 4.66 | 4.42 | 4.7  | 6.34 | 5.52 | 5.43  | 5.4  |
| LTBP1         | 4.81 | 4.88 | 5.3  | 5.4  | 6.03 | 5.52 | 6.34  | 5.97 |
| ANAPC4        | 4.92 | 4.18 | 5.32 | 6.51 | 4.96 | 5.52 | 9.8   | 7.49 |
| CXorf38       | 4.79 | 4.63 | 5.5  | 5.63 | 5.24 | 5.53 | 5.94  | 5.85 |
| FAM24B        | 3.64 | 4.48 | 5.16 | 4.02 | 5.23 | 5.53 | 6.31  | 5.88 |
| PPARA         | 5.23 | 5.41 | 5.71 | 5.63 | 5.71 | 5.53 | 5.62  | 5.98 |
| LPIN2         | 5.51 | 5.19 | 5.47 | 5.96 | 5.98 | 5.53 | 6.45  | 6.13 |
| GPHN          | 5.11 | 5.35 | 5.44 | 4.99 | 5.65 | 5.53 | 7.16  | 6.44 |
| ITSN1         | 6.2  | 5.29 | 6.61 | 7.03 | 6.26 | 5.53 | 7.29  | 6.89 |
| COG3          | 5.17 | 4.43 | 5.53 | 6.21 | 5.94 | 5.53 | 8.22  | 7.33 |
| ETV1          | 6.18 | 5.43 | 6.69 | 6.41 | 6.02 | 5.53 | 8.01  | 7.6  |
| THUMPD1       | 4.53 | 4.83 | 6.79 | 7.42 | 6.39 | 5.53 | 10.3  | 9.4  |
| CCP110        | 5.1  | 4.54 | 6.1  | 7.05 | 5.63 | 5.53 | 12.77 | 9.71 |
| TMEM53        | 5.01 | 5.65 | 4.88 | 4.51 | 5.19 | 5.54 | 3.99  | 4.84 |
| TRAIP         | 6.19 | 6.69 | 5.07 | 4.88 | 6.26 | 5.54 | 5.93  | 5.73 |
| ZNF786        | 5.83 | 5.56 | 5.54 | 6.19 | 6.2  | 5.54 | 5.75  | 6.11 |
| RIPK1         | 6.03 | 5.92 | 6.41 | 5.36 | 5.04 | 5.54 | 5.53  | 6.26 |
| SS18L1        | 5.2  | 4.42 | 5.08 | 6.35 | 5.26 | 5.54 | 8.83  | 7.53 |
| LPP           | 4.27 | 4.03 | 5.64 | 6.69 | 5.32 | 5.54 | 8.55  | 7.92 |

|            |      |      |      |      |      |      |       |      |
|------------|------|------|------|------|------|------|-------|------|
| PPIP5K2    | 4.56 | 4.64 | 4.8  | 5.92 | 5.47 | 5.54 | 9.63  | 8.14 |
| IRS1       | 4.85 | 4.67 | 5.29 | 5.09 | 5.72 | 5.55 | 5.48  | 5.87 |
| KLHL18     | 4.93 | 4.91 | 4.56 | 4.87 | 6.02 | 5.55 | 6.38  | 5.96 |
| HABP4      | 4.51 | 4.9  | 5.02 | 5.09 | 5.57 | 5.55 | 6.17  | 6.21 |
| GTF2E1     | 5.83 | 5.27 | 5.37 | 6.37 | 5.95 | 5.55 | 7.39  | 6.66 |
| P3H2       | 6.1  | 5.52 | 5.54 | 5.87 | 6.24 | 5.55 | 7.37  | 7.01 |
| TMTC3      | 4.36 | 4.37 | 5.3  | 5.96 | 4.98 | 5.55 | 9.14  | 7.64 |
| EPS8       | 5.28 | 4.27 | 6.2  | 7.31 | 5.86 | 5.55 | 7.95  | 7.68 |
| TOPORS     | 5.51 | 5.85 | 6.28 | 7.05 | 7.05 | 5.55 | 9.47  | 7.71 |
| TADA1      | 6.59 | 5.78 | 6.72 | 6.98 | 5.63 | 5.56 | 7.21  | 6.66 |
| ALG13      | 4.1  | 4.62 | 5.02 | 5.29 | 6    | 5.56 | 7.88  | 6.75 |
| ASXL2      | 4.69 | 3.88 | 5.42 | 6.23 | 5.54 | 5.56 | 7.28  | 6.79 |
| ATF2       | 4.66 | 4.88 | 5.8  | 7.42 | 5.36 | 5.56 | 9.64  | 7.76 |
| DNAJB9     | 5.44 | 6.19 | 6.15 | 6.7  | 6.37 | 5.56 | 9.47  | 7.98 |
| GOS2       | 5.26 | 5.06 | 4.45 | 4.7  | 5.3  | 5.57 | 3.9   | 4.99 |
| ZNF324     | 5.95 | 5.82 | 5.25 | 5.5  | 6.24 | 5.57 | 5.06  | 5.84 |
| BCKDHB     | 6.16 | 6.94 | 7.02 | 7.96 | 5.72 | 5.57 | 8.21  | 7.85 |
| MAGOHB     | 6.91 | 6.85 | 6.19 | 6.75 | 7.09 | 5.57 | 8.78  | 7.95 |
| LCMT2      | 6.31 | 5.68 | 6.24 | 5.16 | 5.38 | 5.58 | 5.31  | 4.88 |
| MYO1E      | 5.85 | 6.45 | 6    | 5.61 | 5.93 | 5.58 | 5.93  | 5.58 |
| CABYR      | 4.53 | 5.33 | 4.96 | 5.13 | 5.73 | 5.58 | 6.82  | 5.88 |
| RTTN       | 5.21 | 4.7  | 5.25 | 5.49 | 6.07 | 5.58 | 7.08  | 6.11 |
| ZBTB40     | 4.4  | 4.34 | 4.66 | 5.37 | 5.5  | 5.58 | 6.84  | 6.37 |
| ZSCAN29    | 4.86 | 4.95 | 5.52 | 6.13 | 5.11 | 5.58 | 6.67  | 6.8  |
| EPT1       | 4.45 | 3.75 | 5    | 5.75 | 6.16 | 5.58 | 9.06  | 7.42 |
| CRLF3      | 5.92 | 6.02 | 6.06 | 6.95 | 6.85 | 5.58 | 9.46  | 7.58 |
| PDGFRA     | 5.19 | 5.18 | 5.06 | 5.68 | 5.18 | 5.58 | 6.56  | 7.76 |
| MORC3      | 4.84 | 4.99 | 5.72 | 6.41 | 5.12 | 5.58 | 8.44  | 7.94 |
| SLC36A1    | 3.93 | 4.63 | 4.82 | 4.39 | 4.4  | 5.59 | 5.65  | 4.96 |
| C7orf25    | 5.83 | 4.76 | 5.73 | 6.67 | 6.31 | 5.59 | 8.53  | 6.67 |
| KRT13      | 4.75 | 5.11 | 4.79 | 4.79 | 4.43 | 5.6  | 4.87  | 5.22 |
| PDSS2      | 4.86 | 5.06 | 5.08 | 5.14 | 5.16 | 5.6  | 5.66  | 5.22 |
| ZSCAN25    | 6.52 | 6.02 | 6.11 | 6.79 | 5.85 | 5.6  | 5.5   | 5.38 |
| ELMOD3     | 5.41 | 5.45 | 6.63 | 5.77 | 6.04 | 5.6  | 5.55  | 5.94 |
| USP12      | 4.99 | 4.63 | 5.14 | 6.55 | 5.26 | 5.6  | 8.11  | 7.04 |
| WDR20      | 5.27 | 6.3  | 5.94 | 6.16 | 6.7  | 5.6  | 6.48  | 7.08 |
| TRAPPC11   | 6.17 | 4.94 | 5.44 | 5.83 | 5.82 | 5.6  | 8.02  | 7.44 |
| C15orf41   | 5.86 | 5.61 | 5.03 | 5.72 | 4.81 | 5.61 | 6.19  | 4.71 |
| HYAL3      | 4.85 | 5.12 | 5.17 | 4.6  | 5.67 | 5.61 | 5.13  | 5.21 |
| TDP1       | 5.37 | 5.58 | 5.42 | 5.31 | 5.9  | 5.61 | 6.44  | 5.81 |
| MSRB3      | 4.44 | 4.49 | 5.58 | 5.81 | 5.16 | 5.61 | 7.1   | 6.24 |
| ACTR8      | 5.32 | 5.2  | 6.35 | 5.84 | 6.18 | 5.61 | 6.36  | 6.72 |
| ZNF343     | 5.29 | 5.27 | 5.54 | 6.5  | 6.32 | 5.61 | 6.94  | 7.5  |
| ZSWIM5     | 6.23 | 5.95 | 5.76 | 6.14 | 5.08 | 5.62 | 5.11  | 5.3  |
| NAA30      | 4.6  | 4.44 | 4.81 | 5.53 | 5.06 | 5.62 | 6.45  | 5.59 |
| AVEN       | 5.87 | 5.07 | 5.31 | 5.1  | 5.15 | 5.62 | 5.64  | 5.88 |
| ZNF623     | 5.88 | 5.28 | 6.12 | 6.67 | 5.53 | 5.62 | 7.03  | 6.4  |
| UBR2       | 5.02 | 4.83 | 5.68 | 6.04 | 6.06 | 5.62 | 7.58  | 6.55 |
| DTD2       | 5.18 | 5    | 5.61 | 5.92 | 6.39 | 5.62 | 9.06  | 7.35 |
| NME6       | 8.15 | 6.76 | 7.14 | 6.92 | 7.06 | 5.62 | 7.73  | 7.76 |
| CEP70      | 5.12 | 5.53 | 5.79 | 6.17 | 5.55 | 5.62 | 10.4  | 8.1  |
| PRAG1      | 6.22 | 6.41 | 6.14 | 6.27 | 5.36 | 5.63 | 4.22  | 4.46 |
| B9D2       | 5.12 | 5.95 | 4.96 | 4.6  | 4.23 | 5.63 | 4.52  | 4.56 |
| GIN3       | 5.69 | 5.51 | 5.21 | 4.17 | 5.58 | 5.63 | 5.35  | 4.78 |
| TECPR2     | 6.22 | 6.07 | 6.36 | 5.97 | 5.67 | 5.63 | 5.56  | 5.41 |
| ALG14      | 4    | 3.63 | 4.62 | 5.17 | 5.57 | 5.63 | 6.55  | 5.81 |
| CYP2U1     | 5.01 | 4.91 | 5.12 | 5.87 | 5.96 | 5.63 | 7.33  | 6.87 |
| CNEP1R1    | 5.99 | 5.35 | 6.81 | 7.07 | 6.62 | 5.63 | 9.1   | 7.67 |
| PTPN13     | 6.18 | 5.62 | 7.32 | 8.97 | 5.87 | 5.63 | 10.37 | 8.71 |
| MIER1      | 5.21 | 5.01 | 6.15 | 7.49 | 6.41 | 5.63 | 10.91 | 9.25 |
| ITPKB      | 5.18 | 6.47 | 5.38 | 5.31 | 5.42 | 5.64 | 4.25  | 4.69 |
| PRSS3      | 6.52 | 5.78 | 5.47 | 5.39 | 6.09 | 5.64 | 3.97  | 5.34 |
| RAD54L     | 6.7  | 6.99 | 6.03 | 6.74 | 6.21 | 5.64 | 6.03  | 6.18 |
| FCHSD2     | 5.41 | 5.3  | 5.43 | 6.2  | 6.53 | 5.64 | 7.54  | 6.78 |
| GTF2IRD2B  | 5.53 | 4.69 | 5.13 | 5.26 | 6.13 | 5.65 | 6.41  | 5.28 |
| PCK2       | 8.83 | 8.25 | 7.91 | 7.37 | 5.2  | 5.65 | 4.57  | 5.55 |
| TRERF1     | 5.91 | 5.45 | 6.42 | 6.52 | 5.55 | 5.65 | 6.39  | 6    |
| SPATA6     | 5.21 | 5.55 | 5.85 | 6.11 | 5.73 | 5.65 | 7.37  | 6.13 |
| SP140L     | 6.87 | 6.47 | 7    | 7.68 | 6.26 | 5.65 | 8.54  | 8.39 |
| UPF3B      | 5.32 | 4.86 | 5.65 | 7.69 | 6.42 | 5.65 | 11.12 | 10   |
| ORC1       | 6.67 | 6.1  | 6.75 | 6.43 | 6.41 | 5.66 | 6.43  | 5.71 |
| ZNF75A     | 4.87 | 4.03 | 5.9  | 6.53 | 5.01 | 5.66 | 9.07  | 5.81 |
| NXPE3      | 4.62 | 4.4  | 4.87 | 5.2  | 5.9  | 5.66 | 6.81  | 6.81 |
| FASTKD3    | 5.82 | 4.98 | 5.31 | 6.34 | 5.65 | 5.66 | 9.53  | 7.85 |
| DICER1     | 4.77 | 4.54 | 6.2  | 7.51 | 5.83 | 5.66 | 9.53  | 8.12 |
| UGT8       | 6.38 | 5.53 | 6.71 | 8.07 | 6.4  | 5.66 | 8.97  | 8.46 |
| TTC14      | 4.69 | 3.94 | 4.89 | 5.88 | 5.34 | 5.66 | 10.81 | 9.16 |
| C17orf53   | 6.17 | 5.95 | 6.27 | 5.11 | 6.53 | 5.67 | 5.75  | 5.95 |
| ZNF451     | 4.69 | 5.26 | 5.94 | 7.2  | 6.56 | 5.67 | 10.19 | 8.41 |
| GPR75-ASB3 | 5.67 | 5.11 | 4.41 | 5.06 | 5.28 | 5.68 | 10.65 | 4.26 |
| TMEM86B    | 5.52 | 5.19 | 5.72 | 5.37 | 5.59 | 5.68 | 4.8   | 5.14 |
| GABRA3     | 5.85 | 6.25 | 5.41 | 5.98 | 5.7  | 5.68 | 6.68  | 6.05 |
| EFL1       | 5.47 | 5.3  | 6.36 | 6.35 | 6.16 | 5.68 | 7.72  | 6.76 |
| CLCN3      | 4.98 | 5.19 | 5.8  | 6.99 | 6.38 | 5.68 | 8.69  | 7.89 |
| IGFLR1     | 7.25 | 6.89 | 6.48 | 6.29 | 5.39 | 5.69 | 4.81  | 4.41 |
| STK40      | 6.17 | 6.77 | 6.58 | 6.67 | 6.13 | 5.69 | 5.09  | 5.43 |

|           |      |      |      |      |      |      |       |      |
|-----------|------|------|------|------|------|------|-------|------|
| PPIP5K1   | 5.7  | 5.55 | 6.4  | 5.92 | 4.96 | 5.69 | 5.97  | 5.54 |
| NFIL3     | 6.73 | 7.21 | 7.01 | 6.99 | 5.37 | 5.69 | 6.71  | 6.06 |
| SLC44A5   | 5.01 | 5.12 | 5.76 | 6.86 | 5.05 | 5.69 | 9.67  | 7.16 |
| AASDHPPPT | 5.39 | 5.56 | 6.24 | 6.6  | 6.29 | 5.69 | 8.43  | 7.43 |
| CCDC103   | 6.49 | 6.14 | 5.57 | 5.36 | 4.84 | 5.7  | 4.11  | 4.74 |
| WVOX      | 6.55 | 5.73 | 6.33 | 5.28 | 5.5  | 5.7  | 4.57  | 4.84 |
| C1R       | 7.39 | 8.24 | 7.23 | 6.97 | 4.95 | 5.7  | 5.48  | 5.21 |
| C20orf196 | 6.15 | 7.48 | 7.17 | 6.94 | 5.77 | 5.7  | 5.92  | 5.82 |
| CIT       | 5.13 | 4.99 | 5.43 | 4.89 | 5.71 | 5.7  | 6.18  | 6.09 |
| FOXJ2     | 5.76 | 5.98 | 5.65 | 5.56 | 5.58 | 5.7  | 6.11  | 6.23 |
| CEBPG     | 4.5  | 4.42 | 5.2  | 5.92 | 5.49 | 5.7  | 6.89  | 6.61 |
| AHCYL2    | 5.32 | 5.55 | 5.56 | 5.9  | 6.25 | 5.7  | 7.59  | 7.07 |
| ARL4A     | 5.09 | 5.59 | 5.32 | 5.54 | 5.82 | 5.7  | 7.95  | 7.08 |
| MOB4      | 5.59 | 5.06 | 6.08 | 7.03 | 5.75 | 5.7  | 9.94  | 7.53 |
| ANKS3     | 4.81 | 4.88 | 5.05 | 5.55 | 5.44 | 5.71 | 5.81  | 4.87 |
| GATA4     | 6.05 | 6.06 | 5.64 | 5.58 | 5.77 | 5.71 | 4.09  | 5.2  |
| TTC39C    | 4.98 | 5.35 | 5.16 | 5.31 | 5.53 | 5.71 | 4.75  | 5.23 |
| NOL12     | 4.98 | 5.21 | 5.63 | 5.38 | 6.01 | 5.71 | 5.88  | 5.45 |
| SIPA1L2   | 5.32 | 5.66 | 5.58 | 5.36 | 4.89 | 5.71 | 5.51  | 5.93 |
| SLC9A7    | 4.18 | 4.54 | 4.36 | 5.34 | 5.46 | 5.71 | 5.89  | 6.43 |
| GLS2      | 6    | 5.38 | 5.32 | 5.09 | 5.96 | 5.71 | 5.75  | 6.52 |
| E2F7      | 5.32 | 4.8  | 5.97 | 5.85 | 6.05 | 5.71 | 7.52  | 6.68 |
| TBC1D15   | 5.43 | 5.11 | 5.67 | 5.96 | 5.74 | 5.71 | 8.99  | 6.82 |
| KIF16B    | 5    | 4.77 | 5.66 | 6.62 | 6.14 | 5.71 | 7.6   | 7.11 |
| PDE7A     | 7.22 | 6.15 | 7.03 | 7.93 | 5.62 | 5.71 | 9.19  | 7.82 |
| C14orf93  | 5.03 | 5.61 | 5.11 | 4.84 | 6.13 | 5.72 | 4.84  | 5.92 |
| SLC22A5   | 5.28 | 5.57 | 5.41 | 5.94 | 6.22 | 5.72 | 6.2   | 5.95 |
| PLEKHA8   | 5.21 | 4.83 | 6.1  | 6.16 | 5.6  | 5.72 | 8.22  | 6.78 |
| GDAP1     | 5.07 | 5.09 | 5.46 | 6.12 | 6.63 | 5.72 | 8.77  | 7.25 |
| MINA      | 4.85 | 3.92 | 5.06 | 6.75 | 5.88 | 5.72 | 8.25  | 7.33 |
| FAM111A   | 5.35 | 4.93 | 6.77 | 8.18 | 5.65 | 5.72 | 10.5  | 8.48 |
| SEMA6C    | 5.65 | 5.55 | 5.7  | 5.23 | 5.37 | 5.73 | 4.5   | 5.32 |
| NAIF1     | 6.26 | 6.4  | 5.43 | 5.78 | 5.93 | 5.73 | 5.62  | 5.46 |
| KIAA1462  | 4.92 | 4.61 | 5.34 | 5.18 | 5.98 | 5.74 | 6.15  | 5.76 |
| RPP40     | 5.08 | 4.47 | 5.05 | 4.31 | 6.56 | 5.74 | 7.09  | 5.84 |
| BCL2L2    | 5.42 | 5.09 | 5.42 | 5.41 | 5.31 | 5.74 | 6.84  | 5.9  |
| IL15      | 5.87 | 5.92 | 6.47 | 7.28 | 5.7  | 5.74 | 5.91  | 6.57 |
| OFD1      | 4.7  | 4.15 | 5.08 | 6.95 | 5.99 | 5.74 | 10.15 | 7.24 |
| TCF4      | 6.84 | 6.4  | 7.81 | 8.86 | 5.84 | 5.75 | 9.07  | 8.35 |
| IREB2     | 4.66 | 4.58 | 5.57 | 6.8  | 5.63 | 5.75 | 9.71  | 8.4  |
| LEO1      | 5.57 | 5.34 | 6.71 | 7.45 | 6.63 | 5.75 | 9.14  | 8.49 |
| PPCDC     | 5.39 | 5.07 | 5.76 | 5.48 | 5.44 | 5.76 | 6.64  | 4.83 |
| CDH24     | 6.49 | 6.28 | 6.19 | 6.73 | 5.29 | 5.76 | 5.51  | 5.49 |
| GATA3     | 7.07 | 6.85 | 6.34 | 6.97 | 5.11 | 5.76 | 5.01  | 5.63 |
| MLLT4     | 6.06 | 5.37 | 6.44 | 6.46 | 5.68 | 5.76 | 7.51  | 6.49 |
| PEX7      | 6.95 | 6.56 | 6.79 | 7.56 | 6.78 | 5.76 | 7.97  | 7.21 |
| KCTD18    | 5.96 | 5.64 | 6.23 | 6.41 | 5.96 | 5.76 | 7.07  | 7.44 |
| MPHOSPH8  | 5.75 | 5.11 | 6.06 | 7.89 | 6.27 | 5.76 | 8.23  | 7.81 |
| NIN       | 5.6  | 4.44 | 6.03 | 6.89 | 6.08 | 5.76 | 9.34  | 7.95 |
| CAPRIN2   | 4.6  | 3.93 | 5.86 | 6.71 | 5.86 | 5.76 | 9.91  | 8.55 |
| ZNF629    | 8.7  | 9.06 | 8.09 | 7.81 | 5.16 | 5.77 | 4.94  | 5.54 |
| USP35     | 5.27 | 4.72 | 5.1  | 4.6  | 5.57 | 5.77 | 5.87  | 5.7  |
| C1orf21   | 6.18 | 6.06 | 6.45 | 6.3  | 5.67 | 5.77 | 6.21  | 6.51 |
| TAF3      | 5.11 | 4.94 | 5.09 | 5.69 | 6.24 | 5.78 | 5.73  | 5.63 |
| FAM185A   | 4.96 | 3.77 | 5    | 4.8  | 5.47 | 5.78 | 6.89  | 5.71 |
| BBS4      | 5.4  | 5.34 | 5.35 | 5.83 | 7.19 | 5.78 | 7.36  | 6.51 |
| LRIF1     | 5.99 | 6.3  | 6.93 | 7.28 | 6.53 | 5.78 | 8.65  | 7.88 |
| ADGRG6    | 5.27 | 4.98 | 6.14 | 7.11 | 5.77 | 5.78 | 9.25  | 8.21 |
| ARHGEF39  | 5.19 | 5.07 | 6.32 | 3.95 | 5.63 | 5.79 | 6.94  | 4.54 |
| SAP30L    | 5.75 | 5.04 | 5.55 | 5.95 | 5.97 | 5.79 | 5.93  | 5.65 |
| CASP7     | 6.1  | 6.04 | 6.34 | 6.27 | 5.91 | 5.79 | 6.38  | 5.87 |
| TIAM1     | 6.53 | 5.98 | 7.09 | 6.82 | 5.84 | 5.79 | 6.61  | 6.2  |
| CWVC25    | 6.66 | 5.92 | 6.36 | 6.57 | 6.99 | 5.79 | 7.62  | 7.52 |
| RNF146    | 5.58 | 4.85 | 6.32 | 7.17 | 5.55 | 5.79 | 8.78  | 7.95 |
| FGFR1LOP2 | 7.19 | 6.66 | 6.75 | 6.22 | 7.83 | 5.79 | 7.98  | 8.88 |
| QPRT      | 8.93 | 9.54 | 8.25 | 8.41 | 4.68 | 5.8  | 5.17  | 5.32 |
| OIP5      | 4.59 | 3.57 | 4.29 | 4.01 | 4.85 | 5.8  | 6.22  | 5.59 |
| ZFP41     | 6.56 | 6.72 | 6.96 | 6.44 | 6.37 | 5.8  | 5.83  | 5.81 |
| LAYN      | 4.07 | 4.44 | 4.97 | 4.82 | 6.18 | 5.8  | 5.68  | 6.3  |
| IMPA1     | 5.07 | 5.45 | 6.05 | 6.35 | 6.63 | 5.8  | 9.06  | 7.59 |
| STYX      | 4.44 | 4.1  | 5.08 | 6.98 | 5.35 | 5.8  | 9.17  | 7.92 |
| ZNF500    | 6.13 | 6.33 | 6.53 | 5.79 | 5.2  | 5.81 | 5.53  | 5.37 |
| ZNF627    | 6.47 | 6.32 | 5.94 | 5.95 | 6.81 | 5.81 | 7.02  | 6.05 |
| IFT57     | 4.95 | 5.31 | 5.31 | 5.48 | 5.91 | 5.81 | 7.29  | 6.25 |
| WIPF1     | 6.04 | 6.17 | 6.19 | 6.96 | 6.02 | 5.81 | 6.71  | 6.55 |
| E2F3      | 4.95 | 5.43 | 5.8  | 6.32 | 6.11 | 5.81 | 8.12  | 7.11 |
| EED       | 6.59 | 6.61 | 6.19 | 6.14 | 6.95 | 5.81 | 8.04  | 7.17 |
| PRDM2     | 6.79 | 6.9  | 7.16 | 7.98 | 6.19 | 5.81 | 8.07  | 7.88 |
| OSGIN2    | 4.83 | 4.73 | 5.75 | 6.68 | 6.71 | 5.81 | 8.94  | 8.21 |
| MAP4K5    | 5.66 | 5.54 | 6.45 | 8.09 | 6.15 | 5.81 | 10.84 | 9.31 |
| GAPVD1    | 5.34 | 4.91 | 5.87 | 5.52 | 5.87 | 5.82 | 7.44  | 6.35 |
| MANSC1    | 7.36 | 7.29 | 7.42 | 8.17 | 6.47 | 5.82 | 8.3   | 7.39 |
| BRCA1     | 5.02 | 5.05 | 5.69 | 7.42 | 6.11 | 5.82 | 10.08 | 7.46 |
| HPF1      | 5.99 | 5.91 | 6.51 | 7.31 | 7.11 | 5.82 | 8.88  | 7.66 |



|          |      |      |      |      |      |      |       |      |
|----------|------|------|------|------|------|------|-------|------|
| PALB2    | 5.07 | 4.36 | 5.5  | 6.48 | 6.06 | 5.82 | 9.95  | 8.09 |
| SEC24A   | 5.65 | 6.12 | 6.65 | 7.84 | 5.88 | 5.82 | 8.06  | 8.18 |
| CCDC142  | 5.46 | 5.29 | 5.48 | 5.85 | 5.98 | 5.83 | 6.36  | 6.06 |
| DIP2B    | 4.98 | 4.91 | 5.42 | 4.96 | 5.4  | 5.83 | 6.46  | 6.08 |
| PXMP4    | 5.74 | 5.51 | 5.86 | 5.96 | 5.64 | 5.84 | 6.02  | 5.61 |
| ELMSAN1  | 6.33 | 5.91 | 6.38 | 6.85 | 6.01 | 5.84 | 5.89  | 6.31 |
| MTRF1L   | 5.58 | 5.56 | 6.36 | 6.03 | 6.2  | 5.84 | 8.42  | 7.46 |
| PRPF18   | 5.22 | 5.54 | 6.59 | 6.27 | 7.99 | 5.84 | 8.09  | 7.59 |
| APBB1    | 5.43 | 5.77 | 5.64 | 5.02 | 5.59 | 5.85 | 4.86  | 5.36 |
| ADARB1   | 5.18 | 5.03 | 4.81 | 5.11 | 5.48 | 5.85 | 6.47  | 5.99 |
| KIAA1549 | 5.37 | 5.08 | 5.43 | 5.6  | 5.33 | 5.85 | 5.51  | 6.05 |
| TSEN2    | 5.43 | 4.52 | 5.05 | 4.94 | 6.39 | 5.85 | 7.8   | 6.29 |
| STK38    | 5.93 | 5.94 | 6.45 | 6.81 | 6.32 | 5.85 | 7.33  | 6.59 |
| TIPARP   | 5.76 | 5.19 | 6.1  | 7.64 | 5.87 | 5.85 | 8.12  | 6.94 |
| SMAD2    | 5.89 | 5.81 | 6.59 | 6.74 | 6.09 | 5.85 | 7.23  | 7.29 |
| MC1R     | 5.34 | 4.44 | 4.72 | 5.38 | 5.13 | 5.86 | 5.99  | 6.14 |
| XRR1A    | 5.62 | 4.96 | 5.47 | 5.23 | 6.18 | 5.86 | 6.01  | 6.54 |
| RNF170   | 5.4  | 5.23 | 6.23 | 7.34 | 5.73 | 5.86 | 8.68  | 6.93 |
| TRUB1    | 5.24 | 5    | 5.6  | 6.35 | 5.94 | 5.86 | 8.92  | 7.37 |
| SEC24B   | 5.87 | 4.66 | 6.35 | 6.89 | 5.76 | 5.86 | 8.19  | 7.93 |
| FAM206A  | 5.34 | 5.04 | 6.37 | 6.9  | 6.73 | 5.86 | 9.82  | 8.03 |
| UEVLD    | 4.98 | 5.51 | 6.61 | 8.07 | 6.33 | 5.86 | 10.48 | 8.18 |
| YAE1D1   | 6    | 5.55 | 6.72 | 6.41 | 5.73 | 5.86 | 10    | 8.51 |
| CSTA     | 9.29 | 8.88 | 8.82 | 8.1  | 6.83 | 5.87 | 8.59  | 6.49 |
| TMEM254  | 6.54 | 6.06 | 6.2  | 7.38 | 6.71 | 5.87 | 7.61  | 6.82 |
| ASF1A    | 5.27 | 6.61 | 7.66 | 6.14 | 6.43 | 5.87 | 7.56  | 7.29 |
| FMR1     | 4.82 | 4.83 | 6.16 | 6.62 | 5.18 | 5.87 | 8.15  | 7.39 |
| LRRC58   | 5.05 | 4.79 | 5.88 | 7.89 | 5.48 | 5.87 | 11.55 | 9.29 |
| IBTK     | 5.07 | 4.71 | 5.59 | 7.45 | 6    | 5.87 | 11.03 | 9.44 |
| STK32C   | 5.51 | 6.48 | 5.2  | 4.6  | 7.21 | 5.88 | 6.1   | 4.72 |
| NINL     | 5.21 | 4.86 | 5.47 | 5.81 | 5.71 | 5.88 | 5.78  | 6.53 |
| TRIQK    | 5.46 | 5.22 | 5.53 | 5.88 | 6.1  | 5.88 | 9.23  | 7.49 |
| SACM1L   | 5.17 | 4.8  | 5.14 | 6.12 | 6.03 | 5.88 | 9.26  | 7.8  |
| ZBTB38   | 5.21 | 4.6  | 6.63 | 7.54 | 6.06 | 5.88 | 9.41  | 7.85 |
| PODNL1   | 9.14 | 8.83 | 9.11 | 8.14 | 5.08 | 5.89 | 4.38  | 4.12 |
| SNX4     | 5.81 | 5.63 | 6.28 | 7.29 | 6.19 | 5.89 | 9.11  | 7.7  |
| SENP6    | 4.89 | 4.7  | 5.58 | 6.51 | 5.96 | 5.89 | 10.19 | 8.11 |
| RAB9A    | 6.87 | 6.16 | 6.17 | 6.43 | 7.19 | 5.89 | 8.68  | 8.4  |
| NPIPB9   | 5.02 | 5.25 | 6.32 | 6.63 | 5.85 | 5.89 | 11.2  | 9.09 |
| PROSER2  | 6.57 | 6.12 | 6.58 | 5.17 | 5.77 | 5.9  | 4.97  | 5.07 |
| HPS5     | 5.4  | 4.71 | 5.72 | 5.93 | 5.67 | 5.9  | 7.44  | 6.52 |
| ATG16L1  | 5.47 | 5.71 | 5.29 | 5.68 | 5.77 | 5.9  | 6.39  | 6.69 |
| SIDT2    | 5.87 | 5.96 | 6.36 | 5.82 | 5.39 | 5.91 | 5.09  | 5.99 |
| FKBP1B   | 6.2  | 6.94 | 7.02 | 6.04 | 5.49 | 5.91 | 4.96  | 6.64 |
| DDAH1    | 4.36 | 4.48 | 5.05 | 5.7  | 6.69 | 5.91 | 8.89  | 6.71 |
| HSF4     | 3.46 | 3.15 | 4.17 | 4.25 | 4.75 | 5.91 | 8.4   | 8.02 |
| IL33     | 2.97 | 3.47 | 3.14 | 3.21 | 5.65 | 5.91 | 9.35  | 8.83 |
| SAPCD2   | 4.76 | 4.3  | 4.42 | 3.92 | 4.79 | 5.92 | 4.33  | 4.78 |
| TNFSF13  | 7.69 | 7.01 | 7.01 | 7.05 | 5.85 | 5.92 | 5.04  | 5.77 |
| IPPK     | 5.27 | 5.37 | 5.54 | 5.1  | 6.56 | 5.92 | 5.79  | 6    |
| MYLIP    | 6.08 | 5.49 | 6.07 | 7.1  | 5.09 | 5.92 | 6.59  | 6.93 |
| CRYZL1   | 5.23 | 5.13 | 5.61 | 6.63 | 6.08 | 5.92 | 8.36  | 7.27 |
| RIT1     | 6.27 | 5.74 | 6.59 | 6.93 | 6.75 | 5.92 | 7.72  | 7.64 |
| ARHGAP22 | 4.42 | 4.13 | 4.57 | 4.61 | 5.65 | 5.93 | 5.8   | 5.34 |
| AKAP13   | 5.54 | 5.08 | 5.9  | 6.38 | 5.92 | 5.93 | 6.48  | 6.26 |
| IPP      | 6.36 | 6.14 | 6.08 | 6.64 | 6.05 | 5.93 | 7.31  | 6.71 |
| DSTYK    | 5.62 | 5.65 | 6.4  | 6.34 | 6.08 | 5.93 | 6.61  | 6.95 |
| RBL1     | 5.45 | 4.52 | 6.89 | 7.57 | 6    | 5.93 | 9.14  | 7.43 |
| NDC80    | 5.84 | 5.38 | 6.16 | 5.77 | 6.46 | 5.93 | 9.16  | 7.56 |
| SENP5    | 5.67 | 4.83 | 6.01 | 6.72 | 6.18 | 5.93 | 8.63  | 7.67 |
| C9orf72  | 4.13 | 3.92 | 4.86 | 4.61 | 5.95 | 5.93 | 8.02  | 7.76 |
| CNTNAP3B | 5.71 | 5.47 | 6.3  | 6.6  | 5.47 | 5.94 | 7.76  | 6.79 |
| DUS4L    | 6.35 | 5.59 | 5.83 | 6.08 | 6.11 | 5.94 | 8.87  | 7.72 |
| RAB22A   | 4.88 | 4.71 | 5.68 | 6.49 | 6.48 | 5.94 | 8.69  | 8.13 |
| MBNL2    | 5.24 | 5.14 | 5.86 | 7.02 | 6.16 | 5.94 | 10    | 9.17 |
| C10orf35 | 6.85 | 5.86 | 5.07 | 5.92 | 6.2  | 5.95 | 5.46  | 5.65 |
| MED7     | 5.22 | 5.08 | 5.88 | 5.69 | 5.58 | 5.95 | 7.6   | 5.99 |
| IFT122   | 7.57 | 7.45 | 6.91 | 6.5  | 6.77 | 5.95 | 6.39  | 6.67 |
| AAED1    | 6.16 | 5.38 | 5.43 | 6    | 5.54 | 5.95 | 6.96  | 6.89 |
| SLC9A3   | 5.88 | 5.35 | 5.86 | 5.38 | 5.68 | 5.96 | 4.47  | 4.88 |
| MCU      | 4.95 | 4.6  | 4.99 | 5.28 | 6.24 | 5.96 | 6     | 5.62 |
| NEK8     | 4.54 | 4.84 | 4.14 | 4.51 | 5.39 | 5.96 | 6.02  | 6.07 |
| MID1     | 6.3  | 6.12 | 6.51 | 6.5  | 5.67 | 5.96 | 7.35  | 6.86 |
| RBM27    | 5.39 | 5.65 | 6.58 | 7.38 | 6.06 | 5.96 | 9.29  | 9.1  |
| KDEL3    | 8.25 | 7.71 | 7.64 | 7.17 | 6.69 | 5.97 | 5.86  | 6.1  |
| OTUD7B   | 6.2  | 6.48 | 6.45 | 6.62 | 6.03 | 5.97 | 6.88  | 6.53 |
| EPHA4    | 6.41 | 6.22 | 6.47 | 6.9  | 5.76 | 5.97 | 6.68  | 7.01 |
| FRYL     | 5.84 | 4.74 | 6.7  | 7.82 | 6.53 | 5.97 | 10.01 | 8.31 |
| PRKD3    | 4.93 | 5.46 | 6.13 | 6.75 | 6.5  | 5.97 | 10.42 | 8.81 |
| CEP72    | 4.82 | 4.6  | 5.06 | 4.82 | 4.63 | 5.98 | 5.24  | 4.94 |
| P2RX5    | 3.92 | 4.74 | 3.9  | 4.04 | 4.77 | 5.98 | 4.76  | 5.13 |
| UFSP2    | 5.52 | 5.28 | 6.76 | 6.11 | 6.62 | 5.98 | 7.97  | 6.76 |
| ZC3HAV1L | 5.87 | 5.57 | 6.28 | 7.18 | 5.62 | 5.98 | 6.71  | 7.06 |
| MASTL    | 6.08 | 4.71 | 6.22 | 7.51 | 6.86 | 5.98 | 8.12  | 7.33 |
| CHKA     | 4.55 | 4.25 | 4.91 | 4.71 | 6.18 | 5.99 | 6.77  | 5.54 |
| SIM2     | 7.11 | 7.03 | 7.1  | 7.03 | 4.96 | 5.99 | 5.18  | 5.89 |

|              |       |       |       |       |      |      |       |       |
|--------------|-------|-------|-------|-------|------|------|-------|-------|
| TOMM40L      | 7.05  | 7.06  | 6.73  | 6.46  | 6.74 | 5.99 | 7.46  | 6.8   |
| PLEKHA3      | 5.49  | 5.05  | 5.61  | 6.13  | 6.59 | 5.99 | 8.11  | 6.97  |
| TJP1         | 6.19  | 5.8   | 6.8   | 7.46  | 6.56 | 5.99 | 8.17  | 7.97  |
| EXOC5        | 5.26  | 5.16  | 6.14  | 6.62  | 5.74 | 5.99 | 10.05 | 8.8   |
| LOC107986805 | 6.02  | 4.53  | 5.41  | 6.33  | 5.56 | 6    | 7.42  | 6.83  |
| ZSCAN21      | 6.35  | 6.48  | 6.65  | 6.35  | 7.17 | 6    | 7.02  | 7.14  |
| C1orf53      | 5.02  | 5.17  | 3.42  | 3.57  | 4.37 | 6.01 | 2.74  | 3.29  |
| DOK7         | 6.11  | 5.43  | 5.71  | 5.63  | 4.62 | 6.01 | 2.85  | 4.63  |
| NFYA         | 5.83  | 6.11  | 6.31  | 6.64  | 6.03 | 6.01 | 6.94  | 6.65  |
| CDC40        | 4.95  | 4.36  | 5.05  | 6.2   | 5.45 | 6.01 | 9.93  | 7.17  |
| TIMM23B      | 4.43  | 6.03  | 5.23  | 5.99  | 5.24 | 6.01 | 7.73  | 7.4   |
| PBRM1        | 5.3   | 4.72  | 6.86  | 6.9   | 7.16 | 6.01 | 9.89  | 8.37  |
| PRKACB       | 5.63  | 5.46  | 5.84  | 6.93  | 6.8  | 6.01 | 10.05 | 8.69  |
| MRM3         | 5.63  | 5.22  | 5.39  | 6.15  | 5.9  | 6.02 | 5.45  | 5.45  |
| TANGO6       | 4.85  | 5.65  | 5.65  | 5.17  | 5.9  | 6.02 | 5.5   | 5.65  |
| KCTD11       | 7.42  | 7.55  | 6.68  | 6.75  | 5.61 | 6.02 | 5.23  | 5.66  |
| RASSF5       | 6.18  | 6.68  | 6.2   | 6.02  | 5.55 | 6.02 | 5.67  | 5.9   |
| TMEM18       | 5.76  | 5.63  | 5.86  | 6.29  | 6.98 | 6.02 | 6.48  | 6.23  |
| MRPL1        | 6.67  | 5.59  | 5.91  | 6.95  | 6.46 | 6.02 | 7.78  | 8.04  |
| WDR37        | 5.94  | 5.72  | 6.24  | 6.43  | 6.05 | 6.03 | 7.59  | 6.49  |
| WDR91        | 6.38  | 6.3   | 6.38  | 6.06  | 6.13 | 6.03 | 6.35  | 6.6   |
| LRBA         | 5.62  | 5.09  | 6.08  | 6.94  | 6.67 | 6.03 | 8.85  | 7.84  |
| NAA15        | 5.03  | 4.69  | 5.84  | 6.99  | 7.07 | 6.03 | 10.46 | 8.34  |
| SLC25A20     | 5.57  | 6.12  | 5.88  | 5.22  | 5.54 | 6.04 | 6.6   | 5.72  |
| POLA1        | 5.99  | 5.31  | 6.8   | 7.17  | 6.03 | 6.04 | 7.24  | 6.1   |
| ACOT13       | 5.86  | 6.03  | 6.14  | 6.32  | 6.52 | 6.04 | 6.73  | 6.6   |
| C21orf2      | 6.16  | 6.67  | 6.21  | 5.93  | 6.12 | 6.05 | 4.88  | 4.95  |
| CYSRT1       | 4.86  | 3.55  | 4.67  | 3.65  | 6.46 | 6.05 | 5.06  | 5.82  |
| TBP          | 5.81  | 6.02  | 5.11  | 6.32  | 5.97 | 6.05 | 6.41  | 5.94  |
| SOBP         | 7.33  | 7.5   | 7.72  | 7.88  | 5.64 | 6.05 | 5.69  | 6.16  |
| RBMS2        | 6.68  | 7.07  | 6.45  | 5.85  | 5.99 | 6.05 | 5.25  | 6.26  |
| TNFRSF19     | 7.57  | 8.26  | 7.27  | 7.75  | 5.55 | 6.05 | 6.77  | 6.61  |
| MFAP3        | 5.32  | 4.58  | 6.02  | 6.58  | 6.38 | 6.05 | 8.53  | 7.56  |
| ARMC8        | 6.15  | 5.44  | 6.05  | 7.43  | 5.55 | 6.05 | 8.02  | 7.73  |
| FAM110A      | 5.57  | 4.66  | 4.88  | 5.14  | 5.93 | 6.06 | 4.4   | 4.9   |
| IFIT1        | 13.84 | 13.97 | 14.74 | 16.06 | 6.53 | 6.06 | 8.38  | 6.11  |
| LYPLAL1      | 5.61  | 5.25  | 5.77  | 6.26  | 6.44 | 6.06 | 8.35  | 7.03  |
| CRYBB2       | 6.71  | 6.4   | 5.62  | 6.4   | 7.75 | 6.06 | 5.47  | 7.33  |
| CDC5L        | 6.29  | 5.97  | 7.15  | 7.82  | 6.67 | 6.06 | 9.17  | 8.27  |
| ANAPC10      | 5.01  | 6.25  | 6.79  | 5.19  | 6.46 | 6.06 | 8.17  | 8.37  |
| CD2AP        | 4.8   | 5.18  | 5.72  | 7.64  | 6.85 | 6.06 | 11.03 | 10.55 |
| BCORL1       | 7.21  | 7.71  | 7.26  | 6.69  | 5.61 | 6.07 | 5.27  | 6.01  |
| CASP1        | 5.61  | 4.67  | 6.5   | 6.52  | 4.77 | 6.07 | 8.17  | 7.63  |
| ZBTB11       | 5.09  | 4.37  | 5.44  | 6.26  | 5.82 | 6.07 | 8.9   | 7.77  |
| DDX52        | 5.79  | 5.24  | 6.23  | 6.95  | 7.04 | 6.07 | 8.87  | 8.33  |
| MBLAC1       | 5.94  | 6.21  | 5.99  | 5.27  | 5.18 | 6.08 | 4.03  | 4.38  |
| CDPF1        | 6.04  | 5.67  | 6.7   | 6.13  | 7.41 | 6.08 | 5.78  | 5.36  |
| KLRC3        | 7.02  | 6.76  | 7.95  | 9.75  | 7.42 | 6.08 | 9.15  | 8.48  |
| CASP6        | 6.18  | 6.63  | 6.43  | 6.87  | 6.13 | 6.09 | 7.65  | 6.31  |
| FBXL17       | 5.79  | 4.45  | 6.26  | 6.49  | 5.16 | 6.09 | 6.74  | 6.64  |
| PEX2         | 6.91  | 6.14  | 7.18  | 6.93  | 6.64 | 6.09 | 7.33  | 6.93  |
| AQR          | 6.04  | 5.32  | 6.76  | 6.54  | 6.16 | 6.09 | 8.66  | 7.6   |
| SPDYE2B      | 4.72  | 4.56  | 5.14  | 5.74  | 6.13 | 6.09 | 9.64  | 7.7   |
| ZNF131       | 5.82  | 6.15  | 7.09  | 7.73  | 6.13 | 6.09 | 10.2  | 8.99  |
| DPH6         | 6.78  | 4.21  | 7.2   | 6.45  | 7.1  | 6.1  | 7.71  | 6.28  |
| IQSEC1       | 5.88  | 5.73  | 5.99  | 6.19  | 6.18 | 6.1  | 6.17  | 6.6   |
| DIRAS1       | 6.92  | 6.21  | 5.85  | 5.95  | 6.11 | 6.1  | 5.41  | 6.95  |
| SLC2A11      | 6.32  | 6.29  | 6.8   | 5.98  | 6.44 | 6.1  | 7.32  | 6.99  |
| ZNRF2        | 6.1   | 5.06  | 6.11  | 5.43  | 5.9  | 6.11 | 6.49  | 4.98  |
| ALKBH3       | 6.08  | 5.78  | 5.53  | 5.59  | 5.02 | 6.11 | 6.36  | 5.48  |
| KPTN         | 5.9   | 6.17  | 5.4   | 5.62  | 7.28 | 6.11 | 4.85  | 5.7   |
| PARS2        | 5.97  | 6.49  | 5.35  | 5.46  | 6.82 | 6.11 | 6.18  | 5.79  |
| SPECC1       | 5     | 5.4   | 5.34  | 5.22  | 6.02 | 6.11 | 6.63  | 5.82  |
| TYW3         | 5.41  | 5.41  | 5.22  | 6.07  | 6.25 | 6.11 | 9.36  | 7.44  |
| CHD1         | 5.46  | 5.26  | 6.13  | 7.59  | 6.01 | 6.11 | 10.67 | 9.46  |
| ATP9B        | 5.18  | 5.43  | 5.49  | 6.01  | 5.64 | 6.12 | 5.7   | 5.58  |
| C22orf46     | 6.43  | 5.35  | 6.7   | 7.32  | 5.9  | 6.12 | 6.62  | 6.86  |
| KNTC1        | 6.29  | 5.26  | 6.32  | 8.01  | 6.26 | 6.12 | 11.29 | 8.18  |
| SIKE1        | 5.02  | 4.74  | 5.4   | 6.91  | 5.92 | 6.12 | 10.98 | 9.26  |
| TYMSOS       | 6.04  | 6.07  | 5.48  | 5.13  | 5.97 | 6.13 | 5.5   | 5.97  |
| CISD1        | 5.61  | 6.71  | 6.16  | 6.43  | 7.06 | 6.13 | 8.12  | 6.29  |
| NDUFAF7      | 5.08  | 5.27  | 5.56  | 6.12  | 5.99 | 6.13 | 8.7   | 6.97  |
| CLN5         | 6.22  | 5.31  | 6.91  | 6.7   | 6.72 | 6.13 | 7.52  | 7.35  |
| OSBPL8       | 5.3   | 5.27  | 5.84  | 6.95  | 6.61 | 6.13 | 11.21 | 10.16 |
| TMEM121      | 7.43  | 7.89  | 7.5   | 5.86  | 5.19 | 6.14 | 3.58  | 4.58  |
| PSMC3IP      | 6.35  | 6.96  | 6.58  | 6.3   | 7.11 | 6.14 | 7.79  | 5.65  |
| ADAMTSL5     | 6.12  | 5.53  | 5.09  | 5.94  | 6.15 | 6.14 | 4.95  | 6.36  |
| HLCS         | 5.88  | 5.86  | 6.07  | 6.9   | 5.64 | 6.14 | 6.81  | 6.99  |
| ARHGAP5      | 5.05  | 4.92  | 6.2   | 6.99  | 5.79 | 6.14 | 10.86 | 8.97  |
| SHROOM2      | 6.83  | 6.27  | 6.46  | 6.6   | 5.84 | 6.15 | 5.47  | 5.83  |
| FBXL8        | 5.2   | 4.03  | 4.93  | 5.37  | 4.78 | 6.15 | 5.5   | 5.89  |
| ANKEF1       | 6.05  | 5.71  | 6.44  | 6.61  | 6.44 | 6.15 | 7.83  | 6.77  |
| RBM12B       | 5.85  | 5.41  | 6.66  | 7.55  | 6.28 | 6.15 | 9.45  | 8.75  |
| ZNF653       | 5.48  | 6.44  | 5.42  | 5.61  | 5.16 | 6.16 | 4.62  | 4.87  |
| ORAOV1       | 4.58  | 4.73  | 4.47  | 5.05  | 5.89 | 6.16 | 7.07  | 6.25  |

|              |      |      |      |      |      |      |       |       |
|--------------|------|------|------|------|------|------|-------|-------|
| PLXDC2       | 6.12 | 5.86 | 6.98 | 7.2  | 5.94 | 6.16 | 6.93  | 7.01  |
| LOC101929839 | 5.76 | 5.88 | 4.49 | 7.23 | 6.76 | 6.16 | 6.02  | 7.31  |
| TCF12        | 6.13 | 5.56 | 7.29 | 8.35 | 6.41 | 6.16 | 9.83  | 8.1   |
| MED23        | 5.86 | 5.32 | 6.95 | 6.5  | 6.49 | 6.16 | 9.3   | 8.58  |
| RUSC2        | 5.91 | 6.41 | 5.64 | 5.63 | 6.17 | 6.17 | 5.44  | 5.92  |
| DDTL         | 5.35 | 5.56 | 4.44 | 6.09 | 6.96 | 6.18 | 6.9   | 6.06  |
| ACYP1        | 6.38 | 6.21 | 4.63 | 6.85 | 6.18 | 6.18 | 8.54  | 6.26  |
| C6orf99      | 4.9  | 4.76 | 3.88 | 6.67 | 6.28 | 6.18 | 6.31  | 6.55  |
| AKAP11       | 5.98 | 5.38 | 7.2  | 8.27 | 6.51 | 6.18 | 13.26 | 10.28 |
| PID1         | 4.13 | 3.69 | 4.52 | 4.58 | 6.76 | 6.19 | 6.57  | 5.52  |
| FKRP         | 6.69 | 7.29 | 6.07 | 6.45 | 5.77 | 6.19 | 5.55  | 5.7   |
| TSC22D2      | 5.91 | 5.91 | 6.46 | 7.24 | 5.78 | 6.19 | 6.03  | 6.43  |
| TMCO4        | 6.39 | 7.36 | 7    | 5.17 | 5.97 | 6.2  | 4.2   | 5.16  |
| KLHDC9       | 7    | 7.79 | 6.65 | 6.6  | 6.4  | 6.2  | 5.8   | 5.38  |
| C2orf81      | 6.54 | 7.13 | 6.71 | 6.01 | 6.21 | 6.2  | 5.57  | 5.79  |
| LDOC1L       | 6.32 | 6.32 | 5.94 | 6.02 | 6.38 | 6.2  | 5.91  | 5.98  |
| SLC35F2      | 5.06 | 4.88 | 5.47 | 5.33 | 6.21 | 6.2  | 6.6   | 6.2   |
| C8orf88      | 5.82 | 5.22 | 4.8  | 6.23 | 6.31 | 6.2  | 8.2   | 6.57  |
| C3orf14      | 6.91 | 5.36 | 7.73 | 7.39 | 6.98 | 6.2  | 8.28  | 7.57  |
| UBXN8        | 4.64 | 5.08 | 4.62 | 5.27 | 6.16 | 6.2  | 7.99  | 7.61  |
| SDAD1        | 6.05 | 6.11 | 6.75 | 7.43 | 7.75 | 6.21 | 10.07 | 9.13  |
| CDAN1        | 5.91 | 6.67 | 5.26 | 5.44 | 6.11 | 6.22 | 5.42  | 5.61  |
| AGAP1        | 5.96 | 6.23 | 6.13 | 6.49 | 5.98 | 6.22 | 6.3   | 6.4   |
| SOCS2        | 5.46 | 5.94 | 5.84 | 6.22 | 6.7  | 6.22 | 7.58  | 6.67  |
| GFPT2        | 6.87 | 6.89 | 6.51 | 6.4  | 6.82 | 6.22 | 6.17  | 6.86  |
| AVL9         | 5.37 | 5.28 | 6.5  | 6.99 | 6.03 | 6.22 | 8.27  | 7.58  |
| WDR47        | 6.22 | 5.55 | 7.29 | 8.25 | 7.33 | 6.22 | 9.31  | 8.75  |
| C5orf22      | 5.79 | 5.42 | 6.67 | 7.71 | 7.51 | 6.22 | 9.73  | 9.01  |
| PPP3CC       | 6.05 | 6.18 | 5.75 | 6.09 | 6.27 | 6.23 | 7.21  | 5.72  |
| TMEM40       | 8.19 | 6.61 | 7.17 | 6.03 | 7.49 | 6.23 | 5.87  | 6.43  |
| TAF8         | 6    | 5.86 | 6.31 | 6.35 | 6.2  | 6.23 | 6.7   | 7.24  |
| ACER3        | 6.78 | 5.84 | 6.25 | 7.6  | 7.26 | 6.23 | 8.3   | 8.4   |
| APBA2        | 6.16 | 5.81 | 5.57 | 5.92 | 5.56 | 6.24 | 5.38  | 4.93  |
| PLIN4        | 5.12 | 5.15 | 5.12 | 4.85 | 5.79 | 6.24 | 5.24  | 5.88  |
| WDR53        | 5.22 | 4.17 | 5.69 | 5.34 | 5.44 | 6.24 | 6.63  | 5.91  |
| C1orf112     | 5.81 | 5.72 | 6.98 | 6.41 | 7.11 | 6.24 | 8.24  | 6.92  |
| LONRF1       | 5.14 | 4.79 | 5.45 | 6.65 | 6.04 | 6.24 | 7.45  | 6.96  |
| DCP1B        | 5.83 | 6.83 | 6.52 | 7.41 | 6.02 | 6.24 | 6.57  | 6.99  |
| FBXO34       | 5.73 | 5.66 | 6.23 | 6.51 | 6.55 | 6.24 | 7.05  | 7.07  |
| SLC25A12     | 6    | 5.63 | 5.9  | 6.44 | 6.51 | 6.24 | 7.97  | 7.38  |
| ANO9         | 4.98 | 5.07 | 4.71 | 5.59 | 5.55 | 6.24 | 7.67  | 8.15  |
| RBM26        | 6.74 | 6.12 | 7.06 | 8.45 | 7.81 | 6.24 | 10.54 | 9.58  |
| WWC3         | 6.3  | 6.25 | 6.67 | 6.4  | 5.94 | 6.25 | 6.55  | 5.93  |
| DUSP5        | 6.4  | 5.66 | 5.58 | 5.58 | 5.65 | 6.25 | 5.77  | 6.57  |
| SPTLC2       | 6.02 | 5.75 | 6.54 | 6.16 | 6.53 | 6.25 | 6.89  | 6.85  |
| CHRNA5       | 4.92 | 5.71 | 6.62 | 6.14 | 6.12 | 6.25 | 6.64  | 6.91  |
| TRIM16L      | 4.58 | 6.06 | 5.81 | 6.95 | 6.69 | 6.25 | 6.27  | 6.98  |
| DMD          | 5.08 | 5.05 | 5.48 | 7.15 | 7.48 | 6.25 | 9.48  | 7.83  |
| RNF141       | 5.29 | 5.38 | 7.19 | 7.48 | 6.25 | 6.25 | 10.31 | 9.04  |
| TPRG1        | 6.74 | 6.22 | 6.73 | 7.34 | 6.95 | 6.26 | 10.05 | 7.41  |
| TMEM191B     | 5.59 | 4.38 | 5.09 | 4.28 | 4.5  | 6.27 | 4.11  | 4.86  |
| LOC107985911 | 5.99 | 7.6  | 6.1  | 6.03 | 6.19 | 6.27 | 6.45  | 6.2   |
| RMND5A       | 5.18 | 4.82 | 5.91 | 6.53 | 6.25 | 6.27 | 7.67  | 7.23  |
| LTB4R        | 4.39 | 4.17 | 4.45 | 5.05 | 5.9  | 6.27 | 8.53  | 7.46  |
| HDHD2        | 5.73 | 5.38 | 6.56 | 6.79 | 7.03 | 6.27 | 9.42  | 7.73  |
| FRAT2        | 4.85 | 5    | 4.7  | 4.94 | 5.48 | 6.28 | 4.82  | 5.19  |
| NUPR1        | 7.8  | 8.18 | 7.81 | 7.35 | 6.31 | 6.28 | 5.49  | 5.19  |
| C21orf58     | 7.36 | 6.27 | 6.45 | 5.88 | 6.27 | 6.28 | 7.57  | 6.46  |
| HAUS2        | 5.33 | 4.71 | 6.1  | 6.54 | 7.25 | 6.28 | 7.99  | 6.51  |
| ATP10D       | 5.39 | 5.4  | 6.05 | 6.49 | 6.62 | 6.28 | 7.68  | 7.51  |
| DCUN1D4      | 5.5  | 5.87 | 5.94 | 7.72 | 6.1  | 6.28 | 11.51 | 9.92  |
| LTB          | 5.68 | 5.21 | 6.84 | 5.66 | 6.24 | 6.29 | 4.4   | 3.92  |
| TUFT1        | 7.01 | 7.06 | 7.71 | 7.23 | 6.11 | 6.29 | 5.4   | 5.93  |
| PCOLCE2      | 5.59 | 5.89 | 6.15 | 5.82 | 6.93 | 6.29 | 7.08  | 5.93  |
| ELF1         | 6.07 | 5.5  | 6.84 | 7.03 | 5.92 | 6.29 | 8.17  | 6.68  |
| L2HGDH       | 4.67 | 4.75 | 5.11 | 6.31 | 6.08 | 6.29 | 7.94  | 7.68  |
| GCLM         | 5.66 | 4.99 | 6.37 | 6.59 | 6.54 | 6.29 | 8.88  | 7.71  |
| CFAP126      | 6.29 | 5.86 | 6.49 | 7.15 | 7.37 | 6.29 | 6.12  | 7.81  |
| RIF1         | 5.05 | 4.74 | 6.26 | 7.07 | 5.97 | 6.29 | 10.74 | 9.09  |
| PIK3C2A      | 4.21 | 4.51 | 5.05 | 7.52 | 5.41 | 6.29 | 12.7  | 10.6  |
| MON1A        | 6.29 | 5.54 | 5.77 | 4.34 | 5.12 | 6.3  | 4.6   | 5.1   |
| PAOX         | 6.71 | 7.85 | 6.53 | 5.97 | 5.8  | 6.3  | 4.2   | 5.27  |
| GNG4         | 6.29 | 6.33 | 6.62 | 6.22 | 6.88 | 6.3  | 6.21  | 6.43  |
| C11orf74     | 5.4  | 6.14 | 4.76 | 6.79 | 4.93 | 6.3  | 7.88  | 6.74  |
| ERCC5        | 5.03 | 4.81 | 4.88 | 5.39 | 6.2  | 6.3  | 6.69  | 6.93  |
| BRCC3        | 5.32 | 4.66 | 5.33 | 7.27 | 5.29 | 6.3  | 9.16  | 7.62  |
| ZNF143       | 4.45 | 3.4  | 3.88 | 4.97 | 7.04 | 6.3  | 10.08 | 8.25  |
| MAB21L3      | 4.87 | 4.7  | 5.92 | 8.14 | 6.13 | 6.3  | 12.17 | 11.12 |
| SLC45A4      | 7.32 | 6.43 | 6.38 | 6.8  | 6.6  | 6.31 | 5.81  | 5.67  |
| STK19        | 5.72 | 6.08 | 5.77 | 5.19 | 6.38 | 6.31 | 5.88  | 6.07  |
| LEMD3        | 5.71 | 4.94 | 6.32 | 6.75 | 6.58 | 6.31 | 7.28  | 6.53  |
| AKR1C1       | 5.96 | 5.77 | 6.29 | 6.18 | 6.74 | 6.31 | 6.75  | 7.29  |
| CACHD1       | 7.8  | 7.48 | 8.34 | 8.17 | 6.22 | 6.31 | 7.78  | 7.69  |
| SETD2        | 5.63 | 5.39 | 6.59 | 7.92 | 6.86 | 6.31 | 9.62  | 8.95  |
| RASA3        | 6.3  | 5.56 | 5.73 | 5.47 | 5.59 | 6.32 | 5.58  | 5.81  |
| TMED8        | 4.92 | 4.74 | 5.84 | 5.17 | 7.39 | 6.32 | 7.67  | 6.29  |

|              |      |      |      |      |      |      |       |       |
|--------------|------|------|------|------|------|------|-------|-------|
| FAM157B      | 6.31 | 4.99 | 6.47 | 7.09 | 6.51 | 6.32 | 10.24 | 8.82  |
| IQCJ-SCHIP1  | 6.45 | 6.21 | 6.97 | 6.1  | 5.6  | 6.33 | 5.54  | 5.11  |
| CENPBD1      | 6.7  | 6.63 | 6.67 | 6.12 | 7    | 6.33 | 6.11  | 6.68  |
| WARS2        | 5.86 | 6    | 5.88 | 6.54 | 6.45 | 6.33 | 8.03  | 6.98  |
| CASK         | 6.76 | 5.89 | 7.22 | 8.01 | 6.78 | 6.33 | 8.09  | 7.81  |
| HNMT         | 5.14 | 4.2  | 4.81 | 6.49 | 5.31 | 6.34 | 7.31  | 5.09  |
| ZNF362       | 8.37 | 9.58 | 8.31 | 8.7  | 5.68 | 6.34 | 4.71  | 5.1   |
| OXSM         | 5.44 | 5.58 | 6.22 | 5.72 | 6.06 | 6.34 | 7.71  | 6.2   |
| KAZN         | 5.92 | 6.09 | 6.39 | 6.14 | 6.96 | 6.34 | 6.57  | 6.75  |
| POLD3        | 6.33 | 6.08 | 7.1  | 7.26 | 6.68 | 6.34 | 7.35  | 7.23  |
| MAP2K4       | 5.6  | 4.99 | 6.32 | 6.94 | 6.38 | 6.34 | 9.2   | 8.51  |
| LOC107985476 | 5.32 | 5.09 | 5.71 | 6.13 | 4.83 | 6.35 | 5.97  | 4.64  |
| LENG9        | 6.73 | 6.69 | 6.55 | 5.53 | 5.36 | 6.35 | 4.79  | 5.28  |
| ZDHHHC14     | 6.63 | 6.07 | 5.84 | 5.81 | 5.61 | 6.35 | 5.16  | 5.33  |
| RTEL1        | 6.52 | 5.88 | 5.41 | 5.45 | 5.85 | 6.35 | 5.79  | 5.68  |
| CNTROB       | 6.53 | 6.19 | 6.44 | 6.15 | 6.38 | 6.35 | 5.69  | 6.56  |
| GLIS3        | 7.3  | 6.79 | 7.94 | 8.16 | 5.81 | 6.35 | 7.3   | 6.76  |
| MLLT11       | 6.86 | 6.71 | 6.87 | 7.43 | 6.55 | 6.35 | 8.49  | 7.95  |
| FUNDC2       | 6.46 | 6.47 | 6.67 | 6.38 | 7.64 | 6.36 | 6.1   | 6.81  |
| HOXA7        | 6.86 | 6.7  | 6.8  | 6.82 | 5.95 | 6.36 | 6.27  | 6.99  |
| PPM1A        | 5.59 | 5.3  | 6    | 6.61 | 6.1  | 6.36 | 8.31  | 7.89  |
| AFTPH        | 5.83 | 5.46 | 6.57 | 7.63 | 6.62 | 6.36 | 10.43 | 8.96  |
| AP3M2        | 6.7  | 6.63 | 6.79 | 7.3  | 7.07 | 6.37 | 8.45  | 7.2   |
| RIOK1        | 5.84 | 5.52 | 5.91 | 6.74 | 7.1  | 6.37 | 7.91  | 8.19  |
| FBXO28       | 5.65 | 5.53 | 6.25 | 7.29 | 7.11 | 6.37 | 9.83  | 8.5   |
| PKIA         | 7.3  | 7.37 | 8.03 | 8.37 | 6.4  | 6.37 | 8.74  | 8.71  |
| PCMTD1       | 5.48 | 5.48 | 6.02 | 7.61 | 6.17 | 6.37 | 10.27 | 9.2   |
| KBTBD4       | 6.37 | 5.84 | 6.75 | 5.99 | 7.55 | 6.38 | 6.54  | 6.53  |
| LSM5         | 5.59 | 6.43 | 6.45 | 6.97 | 7.16 | 6.38 | 9.1   | 7.86  |
| MRPL19       | 5.69 | 5.5  | 6.46 | 6.54 | 6.93 | 6.38 | 8.87  | 8.46  |
| ADGRA2       | 8.44 | 7.93 | 7.8  | 7.87 | 5.88 | 6.39 | 4.6   | 5.1   |
| USP42        | 5.89 | 5.56 | 6.47 | 6.89 | 6.08 | 6.39 | 6.43  | 6.85  |
| VPS13D       | 5.67 | 5.46 | 5.86 | 6.55 | 6.48 | 6.39 | 7.72  | 7.48  |
| RPS6KC1      | 5.55 | 5.89 | 5.62 | 6.61 | 5.43 | 6.39 | 8.89  | 7.7   |
| SNX2         | 5.16 | 5.13 | 5.87 | 7.27 | 6.62 | 6.39 | 10.37 | 8.49  |
| FARS2        | 5.73 | 6.09 | 5.78 | 5.64 | 5.8  | 6.4  | 5.15  | 5.33  |
| PPAN-P2RY11  | 4    | 5.93 | 4.81 | 5.88 | 6.46 | 6.4  | 3.31  | 5.96  |
| KDELC1       | 5.79 | 6.02 | 6.71 | 6.79 | 6.5  | 6.4  | 7.4   | 6.34  |
| RPF2         | 5.25 | 5.25 | 5.52 | 6.03 | 6.76 | 6.4  | 7.92  | 6.9   |
| DUSP22       | 5.01 | 5.89 | 5.32 | 6.65 | 6.46 | 6.4  | 6.24  | 7.32  |
| INPP4B       | 5.83 | 5.69 | 5.88 | 8.22 | 6.34 | 6.4  | 9.89  | 9.02  |
| MSX1         | 5.63 | 6.02 | 5.26 | 5.71 | 5.55 | 6.41 | 5.04  | 4.99  |
| HFE          | 7.14 | 6.61 | 6.51 | 6.64 | 5.84 | 6.41 | 6.17  | 6.31  |
| ZNF691       | 6.13 | 5.61 | 6.66 | 5.93 | 6.73 | 6.41 | 6.96  | 6.46  |
| SETD1B       | 6.32 | 6.55 | 5.93 | 6.68 | 6.13 | 6.41 | 6.26  | 6.79  |
| ACAD8        | 5.47 | 5.85 | 5.41 | 5.7  | 6.46 | 6.41 | 6.24  | 6.93  |
| YAP1         | 6.53 | 5.77 | 7.38 | 7.76 | 6.5  | 6.41 | 8.4   | 7.73  |
| CDCA2        | 5.56 | 5.3  | 5.74 | 6.15 | 7.65 | 6.41 | 8.68  | 8.16  |
| GALNT7       | 6.65 | 6.16 | 7.83 | 8.68 | 6.31 | 6.41 | 9.94  | 8.56  |
| FAM69B       | 9.46 | 8.9  | 8.48 | 8.3  | 6.49 | 6.42 | 5.41  | 6.33  |
| NMT2         | 7.58 | 6.13 | 8.06 | 7.62 | 6.72 | 6.42 | 7.67  | 7.55  |
| TMA16        | 6.16 | 6.53 | 7.47 | 8.6  | 7.78 | 6.42 | 9.43  | 8.44  |
| CLK1         | 6.4  | 7.6  | 8.82 | 8.64 | 6.1  | 6.42 | 11.54 | 9.31  |
| UFL1         | 5.12 | 5.19 | 6.05 | 7.73 | 5.92 | 6.42 | 12.21 | 10.2  |
| NEURL4       | 5.87 | 5.83 | 5.43 | 5.7  | 6.01 | 6.43 | 5.37  | 5.46  |
| PCNX2        | 5.86 | 5.62 | 6.02 | 6.91 | 6.91 | 6.43 | 7.6   | 7.5   |
| FAM208B      | 5.04 | 4.81 | 6.68 | 7.75 | 6.57 | 6.43 | 11.07 | 8.9   |
| MPDZ         | 6.19 | 5.57 | 7.41 | 8.42 | 7.17 | 6.43 | 10.79 | 9.32  |
| PPP4R2       | 6.06 | 5.95 | 7.15 | 8.08 | 7.04 | 6.43 | 11.96 | 10.14 |
| MZT1         | 5.97 | 5.33 | 5.63 | 6.41 | 6.88 | 6.43 | 9.33  | 7.36  |
| USP25        | 5.78 | 5.46 | 7.65 | 7.68 | 6.44 | 6.44 | 10.5  | 8.32  |
| EDEM3        | 5.55 | 5.06 | 6.73 | 7.7  | 6.46 | 6.44 | 12.85 | 11.07 |
| ZNF717       | 6.78 | 6.08 | 7.2  | 7.95 | 6.83 | 6.45 | 8.24  | 8.22  |
| FBXO22       | 4.69 | 4.85 | 5.86 | 4.75 | 6.38 | 6.46 | 5.97  | 6.64  |
| HSF2         | 5.32 | 5.82 | 6.58 | 6.7  | 6.41 | 6.46 | 8.23  | 7.77  |
| ATP5S        | 7.18 | 6.64 | 6.55 | 8.59 | 7.92 | 6.46 | 8.69  | 7.87  |
| C15orf57     | 6.9  | 6.31 | 6.19 | 7.53 | 6.96 | 6.46 | 5.29  | 8.13  |
| UBXN2A       | 7.01 | 6.34 | 7.84 | 7.58 | 7.77 | 6.46 | 9.08  | 9.26  |
| LOC102724813 | 5.8  | 5.01 | 5.51 | 7.18 | 5.78 | 6.46 | 10.5  | 10.24 |
| ARL5B        | 6.05 | 6.13 | 6.71 | 7.49 | 6.07 | 6.47 | 10.41 | 9.23  |
| ZNF646       | 7.28 | 6.89 | 7.1  | 6.95 | 6.49 | 6.48 | 5.42  | 5.95  |
| TBK1         | 5.33 | 5.21 | 5.81 | 6.01 | 6.28 | 6.48 | 10.56 | 7.83  |
| PLCE1        | 5.9  | 5.76 | 6.7  | 7.67 | 6.63 | 6.48 | 8.58  | 7.89  |
| TWISTNB      | 5.93 | 4.94 | 5.85 | 7.68 | 6.39 | 6.48 | 10.12 | 9.04  |
| CCNG2        | 5.93 | 6.15 | 6.58 | 6.7  | 5.94 | 6.49 | 9.42  | 7.59  |
| SLC9A6       | 5.75 | 6.41 | 6.81 | 7.33 | 6.82 | 6.49 | 8.81  | 7.96  |
| CASD1        | 4.97 | 4.72 | 5.45 | 6.63 | 5.96 | 6.49 | 10.88 | 9.06  |
| DNAJC13      | 5.48 | 4.76 | 6.7  | 7.79 | 6.31 | 6.49 | 10.31 | 9.39  |
| ATE1         | 6.61 | 4.96 | 7.08 | 8.66 | 7.5  | 6.49 | 9.62  | 10.12 |
| CHST10       | 6.7  | 6.64 | 6.41 | 6    | 6.61 | 6.5  | 5.95  | 5.95  |
| RNF103       | 5.63 | 5.02 | 6.14 | 6.22 | 5.89 | 6.5  | 7.74  | 6.47  |
| ZHX3         | 6.08 | 5.9  | 5.85 | 6.27 | 6.34 | 6.5  | 6.87  | 6.62  |
| PROSER1      | 6.46 | 6.59 | 6.44 | 7    | 6.99 | 6.5  | 7.8   | 7.57  |
| AAGAB        | 6.6  | 6.03 | 6.51 | 7.33 | 8.06 | 6.5  | 9.16  | 8.27  |
| GMCL1        | 5.75 | 5.33 | 7.04 | 7.56 | 7.29 | 6.5  | 10.61 | 9.2   |

|              |      |      |      |      |      |      |       |       |
|--------------|------|------|------|------|------|------|-------|-------|
| E2F1         | 7.78 | 7.61 | 6.63 | 7.21 | 6.43 | 6.51 | 5.58  | 5.31  |
| DNAJC16      | 5.75 | 5.61 | 6.44 | 6.54 | 6.44 | 6.51 | 7.75  | 7.11  |
| MTERF4       | 6.77 | 6.44 | 6.79 | 7.39 | 6.57 | 6.51 | 7.85  | 7.33  |
| MVB12B       | 6.78 | 6.19 | 6.29 | 6.87 | 7.12 | 6.52 | 6.09  | 6.62  |
| LOC107987205 | 6.52 | 4.98 | 7.4  | 5.96 | 4.17 | 6.52 | 6.95  | 6.66  |
| PAXIP1       | 6.58 | 5.88 | 6.81 | 7.24 | 7.52 | 6.52 | 9.3   | 7.58  |
| CBLL1        | 6.28 | 6.55 | 7.35 | 7.47 | 6.97 | 6.52 | 8.06  | 8.25  |
| APPBP2       | 6.63 | 5.94 | 7.11 | 7.97 | 6.73 | 6.52 | 11.06 | 8.81  |
| MOSPD2       | 5.06 | 5.41 | 6.64 | 7.56 | 5.99 | 6.52 | 11.87 | 10.24 |
| FBF1         | 6.67 | 6.15 | 6.29 | 5.97 | 6.58 | 6.53 | 5.86  | 5.95  |
| MRPL22       | 6.06 | 5.89 | 6.38 | 6.36 | 6.76 | 6.53 | 7.73  | 6.43  |
| C11orf95     | 7.17 | 6.79 | 6.46 | 6.69 | 6.79 | 6.53 | 6.09  | 6.63  |
| NFRKB        | 6.14 | 5.2  | 5.81 | 5.84 | 6.42 | 6.53 | 6.93  | 6.72  |
| RPP14        | 5.89 | 5.99 | 5.97 | 5.78 | 7    | 6.53 | 7.59  | 6.97  |
| CNST         | 5.06 | 4.56 | 5.53 | 6.02 | 6.59 | 6.53 | 8.93  | 7.48  |
| DBR1         | 6.44 | 6.38 | 6.34 | 6.83 | 7.27 | 6.53 | 7.87  | 7.67  |
| BRWD1        | 6.57 | 6.15 | 7.18 | 8.44 | 6.73 | 6.53 | 9.72  | 8.32  |
| CREB1        | 5.92 | 6.55 | 6.66 | 8.28 | 5.75 | 6.53 | 8.22  | 8.8   |
| GPCPD1       | 6.66 | 6.66 | 7.84 | 8.85 | 5.97 | 6.53 | 10.21 | 9.19  |
| ARHGEF18     | 7.02 | 7.28 | 6.36 | 6.75 | 5.79 | 6.54 | 5.62  | 6.02  |
| TDRD7        | 7.58 | 7.7  | 7.69 | 9.07 | 6.43 | 6.54 | 7.92  | 6.1   |
| FAM104B      | 5.65 | 6.41 | 6.02 | 5.28 | 6.29 | 6.54 | 8.47  | 6.65  |
| MAPRE2       | 7.37 | 6.55 | 7.51 | 7.75 | 7.21 | 6.54 | 7.85  | 7.26  |
| VPS8         | 5.88 | 5.55 | 6.18 | 7.29 | 6.55 | 6.54 | 9.39  | 7.81  |
| LOC100996414 | 7.3  | 6.11 | 6.89 | 7.23 | 7.29 | 6.54 | 10.19 | 8.11  |
| DBF4         | 5.23 | 4.82 | 5.7  | 6.38 | 6.49 | 6.54 | 10.27 | 9.16  |
| HIBCH        | 6.38 | 6.09 | 6.87 | 7.43 | 7.5  | 6.54 | 9.62  | 9.61  |
| RNF6         | 6.13 | 5.58 | 6.8  | 8.63 | 7.06 | 6.54 | 10.95 | 10.05 |
| MAN2A2       | 6.27 | 6.85 | 6.89 | 6.9  | 5.66 | 6.55 | 6.09  | 6.51  |
| GOLGA1       | 6.39 | 5.66 | 6.56 | 6.5  | 6.68 | 6.55 | 7.09  | 6.63  |
| GNG11        | 6.48 | 6.9  | 7.37 | 6.68 | 6.64 | 6.55 | 7.43  | 6.76  |
| GID4         | 5.2  | 5.83 | 5.38 | 6.32 | 6.32 | 6.55 | 6.93  | 6.99  |
| KMT5B        | 6.13 | 6.22 | 7.04 | 8.59 | 7.35 | 6.55 | 9     | 8.68  |
| DOCK5        | 5.84 | 5.47 | 6.57 | 7.46 | 6.57 | 6.55 | 9.8   | 8.93  |
| ADAT3        | 6.94 | 7.19 | 6.11 | 6.09 | 6.06 | 6.56 | 4.48  | 5.1   |
| DCUN1D5      | 5.57 | 5.3  | 5.66 | 5.93 | 6.72 | 6.56 | 5.78  | 5.86  |
| RNF24        | 7.18 | 6.89 | 7.34 | 7.33 | 5.61 | 6.56 | 6.61  | 6.1   |
| IKBKE        | 8.31 | 8.16 | 7.13 | 7.17 | 6.63 | 6.56 | 6.17  | 6.69  |
| KHNYN        | 6.78 | 6.29 | 6.51 | 6.08 | 6.09 | 6.56 | 6.6   | 6.9   |
| MTMR2        | 6.24 | 5.39 | 6.54 | 6.78 | 7.23 | 6.56 | 8.96  | 8.34  |
| STAM2        | 5.88 | 5.33 | 6.41 | 7.28 | 6.34 | 6.56 | 10.16 | 8.54  |
| DDX59        | 6.92 | 6.43 | 6.82 | 7.23 | 7.14 | 6.56 | 8.46  | 9.24  |
| MMP15        | 8.52 | 9.3  | 8.37 | 7.79 | 6.36 | 6.58 | 5.3   | 6.34  |
| ZRANB1       | 6.43 | 5.71 | 6.37 | 6.48 | 6.23 | 6.58 | 7.27  | 7.54  |
| RNF144B      | 7.08 | 6.58 | 7.2  | 7.64 | 6.82 | 6.58 | 8.87  | 7.8   |
| POLR3F       | 5.98 | 4.88 | 6.48 | 6.64 | 7.03 | 6.58 | 11    | 9.15  |
| FRA10AC1     | 7.1  | 6.75 | 6.06 | 7.19 | 8.64 | 6.58 | 10.17 | 10.14 |
| TMEM99       | 4.94 | 5.87 | 5.71 | 5.87 | 6.91 | 6.59 | 6.29  | 5.58  |
| RPUSD4       | 5.64 | 5.3  | 4.88 | 5.2  | 7.29 | 6.59 | 6.27  | 6.54  |
| TUBGCP4      | 5.86 | 6.19 | 6.6  | 6.22 | 6.53 | 6.59 | 6.45  | 7.02  |
| EIF4ENIF1    | 7.32 | 6.85 | 6.2  | 6.59 | 6.26 | 6.59 | 6.64  | 7.17  |
| FOXN3        | 7.47 | 6.58 | 7.41 | 7.89 | 7.36 | 6.59 | 8.04  | 7.53  |
| USP6NL       | 6.4  | 5.95 | 6.62 | 7.63 | 7.18 | 6.59 | 8.51  | 7.81  |
| PIK3C3       | 6.86 | 6.21 | 6.85 | 7.93 | 6.88 | 6.59 | 8.82  | 8.23  |
| CUTC         | 5.56 | 5.93 | 7.73 | 6.3  | 6.66 | 6.59 | 8.08  | 8.82  |
| CORO7        | 5.9  | 5.74 | 5.81 | 6.39 | 5.02 | 6.6  | 4.77  | 5.15  |
| ANGEL1       | 5.94 | 6.56 | 6.08 | 6.58 | 6.33 | 6.6  | 6.26  | 6.77  |
| PDP2         | 5.48 | 5.93 | 5.46 | 6.05 | 6.55 | 6.61 | 6.89  | 6.82  |
| CCDC188      | 5.29 | 5.64 | 6.41 | 6.26 | 6.27 | 6.61 | 8.08  | 7.29  |
| SIRPB1       | 5.27 | 7.06 | 6.04 | 5.81 | 5.91 | 6.62 | 4.42  | 4.44  |
| MEF2B        | 5.54 | 5.52 | 6.22 | 6.12 | 5.66 | 6.63 | 4.12  | 5.12  |
| PELI3        | 7.76 | 7.69 | 7.23 | 5.79 | 6.68 | 6.63 | 5.38  | 5.7   |
| FBXO41       | 6.28 | 6    | 6.46 | 6.67 | 6.06 | 6.63 | 6.26  | 6.02  |
| ALDH6A1      | 6.55 | 6.56 | 6.34 | 7.08 | 6.6  | 6.63 | 8.1   | 7.43  |
| PRR3         | 6.68 | 6.73 | 6.86 | 6.14 | 7.47 | 6.63 | 7     | 7.49  |
| PIGM         | 6.7  | 6.61 | 7.36 | 8.19 | 7.56 | 6.63 | 8.64  | 7.66  |
| SLAIN2       | 6.53 | 5.88 | 7.21 | 7.87 | 7.29 | 6.63 | 9.18  | 8.67  |
| TRMT1L       | 5.79 | 5.96 | 6.63 | 7.95 | 6.93 | 6.63 | 10.17 | 8.75  |
| SP3          | 6.82 | 7.29 | 8.02 | 9.09 | 6.85 | 6.63 | 10.57 | 9.85  |
| FMNL1        | 7.96 | 8.31 | 8.24 | 7.5  | 5.85 | 6.64 | 5.09  | 5.52  |
| ZNF266       | 5.79 | 5.73 | 5.78 | 6.61 | 6.81 | 6.64 | 8.16  | 7.92  |
| BCHE         | 6.06 | 6.26 | 7.1  | 6.91 | 6.16 | 6.64 | 9     | 8.36  |
| CACU11       | 5.93 | 5.51 | 6.68 | 7.34 | 6.92 | 6.64 | 8.85  | 8.55  |
| RGMB         | 7.13 | 6.76 | 6.17 | 7.03 | 6.62 | 6.65 | 7.13  | 6.86  |
| ZNF592       | 6.87 | 6.89 | 6.88 | 7    | 6.59 | 6.65 | 6.42  | 6.97  |
| ZZZ3         | 5.98 | 5.65 | 6.22 | 8.23 | 6.54 | 6.65 | 10.55 | 8.97  |
| RPS6KA3      | 5.7  | 5.1  | 7.24 | 8.34 | 7.26 | 6.65 | 11.57 | 9.47  |
| SLC25A15     | 6.21 | 6.02 | 5.73 | 5.85 | 7.45 | 6.66 | 7.35  | 7.14  |
| DBF4B        | 6.23 | 6.12 | 6.9  | 6.29 | 7.27 | 6.66 | 7.48  | 7.49  |
| SLC39A8      | 6.64 | 4.79 | 5.19 | 6.39 | 7.14 | 6.66 | 8.79  | 7.52  |
| MPPE1        | 7.38 | 7.54 | 6.27 | 7.13 | 5.74 | 6.66 | 6.6   | 7.65  |
| RAPGEFL1     | 7.07 | 8.29 | 6.89 | 7.32 | 6.32 | 6.66 | 6.42  | 7.87  |
| DYNC2L11     | 6.76 | 6.18 | 6.47 | 6.99 | 7.54 | 6.66 | 9.51  | 8.16  |
| NEK7         | 4.88 | 5.02 | 5.53 | 6.21 | 6.73 | 6.66 | 11.17 | 8.63  |
| GCFC2        | 5.97 | 5.93 | 6.54 | 7.21 | 6.36 | 6.66 | 8.25  | 8.66  |

|           |       |      |       |       |      |      |       |       |
|-----------|-------|------|-------|-------|------|------|-------|-------|
| F3        | 6.62  | 6.59 | 7.34  | 8.15  | 7.42 | 6.66 | 10.57 | 9.14  |
| NR3C1     | 6.39  | 5.5  | 7.31  | 8.55  | 7.37 | 6.66 | 10.36 | 9.36  |
| ZNF117    | 4.73  | 4.41 | 5.85  | 7.04  | 5.78 | 6.66 | 14.88 | 12.1  |
| PARD6A    | 6.65  | 5.37 | 5.94  | 4.22  | 6.27 | 6.67 | 5.67  | 4.96  |
| KCTD21    | 5.84  | 5.96 | 6.62  | 6.25  | 6.6  | 6.67 | 5.99  | 6.27  |
| CC2D2A    | 6.17  | 6.82 | 5.76  | 6.93  | 5.91 | 6.67 | 7.3   | 6.77  |
| IFNAR2    | 8.1   | 7.63 | 7.96  | 9.55  | 7.53 | 6.67 | 7.45  | 8.53  |
| CUL2      | 5.63  | 5.48 | 6.66  | 7.57  | 6.81 | 6.67 | 10.03 | 8.58  |
| GRAMD3    | 8.46  | 8.88 | 8.85  | 10.37 | 7.51 | 6.67 | 9.57  | 9.83  |
| TIPIN     | 5.61  | 4.93 | 5.89  | 6.41  | 6.37 | 6.68 | 7.12  | 6.85  |
| SPIRE1    | 5.06  | 5.56 | 5.36  | 6.65  | 7.51 | 6.68 | 7.33  | 7.76  |
| ARID4B    | 6.42  | 6.29 | 7.39  | 9.7   | 6.53 | 6.68 | 12.53 | 11.52 |
| ELOVL6    | 4.47  | 4.57 | 6.85  | 7.64  | 6.11 | 6.69 | 9.97  | 8.35  |
| SLC7A6    | 5.35  | 5.16 | 6.31  | 6.28  | 6.76 | 6.69 | 9.25  | 8.38  |
| TTK       | 5.82  | 5.87 | 5.64  | 5.59  | 7.07 | 6.69 | 10.31 | 8.64  |
| RAB3GAP2  | 5.69  | 5.28 | 7.19  | 8.24  | 7.48 | 6.69 | 11.7  | 9.3   |
| FLVCR1    | 5.83  | 5.47 | 6.75  | 6.4   | 5.84 | 6.7  | 8.45  | 7.09  |
| PET117    | 6.59  | 5.61 | 7.32  | 5.66  | 6.76 | 6.7  | 7.52  | 7.39  |
| USP47     | 5.89  | 5.6  | 7.39  | 8.85  | 7    | 6.7  | 11.14 | 9.56  |
| SOCS3     | 6.25  | 6.5  | 6.2   | 5.93  | 6.05 | 6.71 | 5.77  | 5.84  |
| OSBPL5    | 9.57  | 8.7  | 8.75  | 7.89  | 6.05 | 6.71 | 5.24  | 6.38  |
| MED13L    | 6.04  | 5.56 | 6.7   | 7.86  | 7.03 | 6.71 | 9.1   | 8.63  |
| PPARG     | 7.18  | 6.95 | 7.21  | 6.84  | 7.71 | 6.71 | 7.54  | 8.67  |
| UBXN7     | 5.66  | 5.27 | 7     | 7.54  | 6.41 | 6.71 | 9.04  | 8.78  |
| PLEKHA2   | 7.24  | 7.04 | 7.57  | 8.1   | 6.5  | 6.72 | 7.42  | 7.19  |
| KIF13A    | 7.22  | 5.73 | 6.53  | 7.77  | 7.48 | 6.72 | 9.82  | 7.5   |
| PHF3      | 5.69  | 5.24 | 6.94  | 9.09  | 6.74 | 6.72 | 12.65 | 10.79 |
| MZF1      | 6.33  | 6.15 | 5.18  | 6.2   | 6.42 | 6.73 | 6.65  | 5.77  |
| SFI1      | 8     | 7.53 | 6.95  | 6.52  | 7.17 | 6.73 | 7.04  | 6.81  |
| UBE2J1    | 5.92  | 5.92 | 6.18  | 6.88  | 6.45 | 6.74 | 7.69  | 6.98  |
| INTS12    | 5.91  | 5.98 | 6.56  | 6.04  | 7.35 | 6.74 | 9.59  | 7.6   |
| APPL1     | 5.88  | 5.26 | 7.06  | 7.94  | 6.76 | 6.74 | 10.1  | 9.79  |
| BHLHE41   | 8.36  | 8.25 | 8.64  | 8.14  | 7.32 | 6.75 | 7.78  | 7.34  |
| NKTR      | 5.83  | 5.17 | 6.51  | 8.49  | 6.02 | 6.75 | 13.99 | 11    |
| ZNF503    | 8.06  | 8.38 | 7.82  | 7.85  | 5.77 | 6.76 | 5     | 5.27  |
| PROSER3   | 7.08  | 7.16 | 6.26  | 6.2   | 5.91 | 6.76 | 5.8   | 6.57  |
| PRKAG2    | 4.9   | 5.3  | 5.46  | 6.03  | 7.08 | 6.76 | 8.65  | 6.58  |
| EXOC1     | 6.66  | 5.43 | 7.46  | 7.52  | 7.11 | 6.76 | 10.72 | 9.51  |
| LIAS      | 6.74  | 6.23 | 7.2   | 8.13  | 8.9  | 6.76 | 11.93 | 10.98 |
| CDC25C    | 5.29  | 5.08 | 5.83  | 5.61  | 6.77 | 6.77 | 6.37  | 6.12  |
| PCDHB8    | 7.17  | 6.91 | 6.83  | 7.89  | 6.23 | 6.77 | 6.25  | 6.54  |
| ARSJ      | 6.58  | 6.31 | 7.25  | 7.89  | 7.06 | 6.77 | 8.5   | 7.43  |
| PCNX1     | 6.83  | 6.59 | 7.37  | 8     | 6.98 | 6.77 | 10.84 | 8.76  |
| PEX1      | 6.18  | 5.84 | 6.61  | 7.57  | 7.43 | 6.77 | 11.24 | 9.05  |
| ATG12     | 6.24  | 5.91 | 6.92  | 8.05  | 7.41 | 6.77 | 10.74 | 9.13  |
| PHLDB2    | 6.5   | 6.04 | 7.36  | 8.54  | 6.65 | 6.77 | 10.86 | 9.31  |
| MAGEA2    | 12.56 | 4.29 | 9.92  | 9.23  | 9.25 | 6.78 | 6.84  | 1.29  |
| FAM109A   | 8.56  | 7.21 | 6.81  | 7.41  | 7.23 | 6.78 | 5.87  | 5.27  |
| ESPL1     | 6.54  | 6.21 | 6.85  | 6.3   | 6.82 | 6.78 | 6.15  | 5.65  |
| SLC29A3   | 6.43  | 6.37 | 6.31  | 5.72  | 6.45 | 6.78 | 5.95  | 6.34  |
| SPRED3    | 6.71  | 6.9  | 6.35  | 6.64  | 6.11 | 6.78 | 6     | 6.84  |
| HDAC8     | 7.8   | 6.92 | 7.17  | 7.17  | 7.13 | 6.78 | 8.09  | 8.54  |
| BOK       | 6.76  | 6.07 | 5.34  | 6.05  | 7.04 | 6.79 | 5.33  | 6.26  |
| PDLIM5    | 6.46  | 5.75 | 7.47  | 8.06  | 6.77 | 6.79 | 8.69  | 8.1   |
| ZNF626    | 6.4   | 5.85 | 7.06  | 7.19  | 7.22 | 6.79 | 9.2   | 8.78  |
| THOC1     | 5.79  | 5.72 | 6.03  | 7.42  | 6.73 | 6.79 | 10.94 | 10.91 |
| MKS1      | 7.37  | 7.33 | 6.39  | 7.52  | 7.1  | 6.8  | 6.87  | 7.3   |
| MAK16     | 5.68  | 4.51 | 5.89  | 7.12  | 6.64 | 6.8  | 9.71  | 7.9   |
| ARHGEF3   | 5.8   | 6.2  | 6.94  | 6.9   | 6.81 | 6.8  | 8.01  | 8.03  |
| CDK17     | 5.95  | 5.74 | 6.98  | 7.66  | 7.34 | 6.8  | 10.27 | 8.3   |
| TATDN3    | 5.85  | 5.51 | 5.57  | 7.35  | 6.35 | 6.81 | 7.84  | 6.57  |
| RCAN1     | 5.27  | 5.77 | 6.57  | 5.74  | 6.16 | 6.81 | 5.93  | 6.58  |
| UNC5B     | 6.73  | 7.11 | 6.58  | 6.5   | 6.6  | 6.81 | 6.07  | 6.81  |
| RCAN3     | 5.46  | 4.92 | 5.46  | 6.82  | 7.31 | 6.81 | 6.83  | 7.03  |
| HIST1H2AC | 8.19  | 9.81 | 11.46 | 9.49  | 5.26 | 6.81 | 5.33  | 7.43  |
| NDEL1     | 6.97  | 6.83 | 7.3   | 6.85  | 7.41 | 6.81 | 8.24  | 8.03  |
| ACSS3     | 7.08  | 6.72 | 7.84  | 9.11  | 7.95 | 6.81 | 10.17 | 8.47  |
| BORCS5    | 5.93  | 7.8  | 6.35  | 6.85  | 6.7  | 6.81 | 7.38  | 8.64  |
| CEP63     | 6.21  | 5.31 | 6.98  | 8.33  | 6.14 | 6.81 | 9.07  | 9.11  |
| USP24     | 6.26  | 5.3  | 6.7   | 7.47  | 7.46 | 6.81 | 10.28 | 9.42  |
| ATRX      | 5.93  | 5.91 | 7.23  | 8.6   | 7.19 | 6.81 | 12.88 | 11.59 |
| PPP1R3F   | 6.05  | 5.32 | 5.96  | 5.17  | 4.62 | 6.82 | 4.24  | 4.3   |
| TEF       | 5.49  | 5.98 | 5.64  | 5.4   | 5.98 | 6.82 | 5.27  | 5.65  |
| MMP24     | 6.51  | 6.13 | 6.18  | 5.83  | 6.04 | 6.82 | 5.76  | 5.84  |
| ARNT2     | 6.85  | 6.72 | 6.56  | 6.97  | 6.97 | 6.82 | 6.67  | 6.62  |
| CCNT1     | 6.27  | 6    | 6.61  | 7.51  | 6.89 | 6.82 | 8.78  | 8.02  |
| RNF168    | 5.9   | 5.41 | 7.05  | 8.07  | 7.44 | 6.82 | 9.15  | 8.7   |
| ZNF195    | 5.46  | 6.94 | 6.25  | 6.55  | 6.72 | 6.82 | 10.03 | 8.78  |
| KIAA1468  | 6.51  | 6.72 | 7.22  | 8.18  | 7.3  | 6.82 | 10.38 | 9.22  |
| MAGEB2    | 6.12  | 6.76 | 6.8   | 6.29  | 6.95 | 6.83 | 7.11  | 6.66  |
| ZNF558    | 7.17  | 6.03 | 6.83  | 8.24  | 6.74 | 6.83 | 10.51 | 8.39  |
| CSAG2     | 4.75  | 6.01 | 2.68  | 5.27  | 6.4  | 6.83 | 15.2  | 14.59 |
| RHBDF1    | 6.1   | 5.91 | 5.93  | 6.49  | 6.92 | 6.84 | 6.35  | 6.98  |
| ZAK       | 5.08  | 4.71 | 6.74  | 7.02  | 6.73 | 6.84 | 10.06 | 7.53  |
| CT45A10   | 5.76  | 7.55 | 8.38  | 7.7   | 8.06 | 6.84 | 10.81 | 9.81  |
| ZNF319    | 7.8   | 6.73 | 7.01  | 6.7   | 6.98 | 6.85 | 5.58  | 6.29  |
| ZNF707    | 8.34  | 6.99 | 7.81  | 7.31  | 6.26 | 6.85 | 6.61  | 6.34  |

|              |      |      |      |      |      |      |       |       |
|--------------|------|------|------|------|------|------|-------|-------|
| PPP2R5B      | 7.54 | 7.98 | 6.58 | 7.57 | 6.53 | 6.85 | 6.14  | 7.18  |
| C2orf47      | 6.03 | 6.23 | 7.26 | 7.2  | 6.67 | 6.85 | 6.99  | 7.31  |
| SLC25A42     | 5.98 | 6.78 | 6.41 | 6.4  | 6.47 | 6.86 | 6.14  | 5.55  |
| PIGW         | 5.35 | 4.98 | 5.87 | 6.21 | 6.41 | 6.86 | 7.7   | 7.59  |
| TSSK3        | 5.61 | 4.91 | 6.25 | 7.56 | 7.03 | 6.86 | 8.4   | 8.67  |
| FAM172A      | 5.2  | 4.69 | 5.48 | 6.49 | 7.33 | 6.86 | 9.59  | 8.67  |
| EPS15        | 6.4  | 6.2  | 7.33 | 7.64 | 8.44 | 6.86 | 11.32 | 9.36  |
| ZDHHC20      | 5.9  | 5.72 | 6.73 | 8.67 | 6.75 | 6.86 | 10.33 | 9.67  |
| SREK1        | 6.13 | 5.81 | 6.83 | 8.65 | 6.77 | 6.86 | 11.72 | 9.76  |
| ANKRD10      | 6.28 | 5.96 | 7.63 | 8.62 | 6.97 | 6.86 | 10.16 | 9.86  |
| LOC107983970 | 8.48 | 8.18 | 7.52 | 6.79 | 6.92 | 6.87 | 4.87  | 4.48  |
| OSGEP        | 6.64 | 6.11 | 6.71 | 7.41 | 7.74 | 6.87 | 7.14  | 6.45  |
| SLC22A23     | 6.32 | 5.96 | 7.39 | 6.71 | 6.85 | 6.87 | 6.97  | 7.37  |
| KDM5A        | 6.89 | 6.77 | 7.32 | 7.88 | 6.83 | 6.87 | 8.1   | 7.7   |
| TRAPPC2      | 6.1  | 7.2  | 7.07 | 8.1  | 7.24 | 6.87 | 9.43  | 9.91  |
| CAMK2D       | 5.54 | 5.81 | 6.25 | 6.42 | 5.99 | 6.88 | 7.45  | 6.86  |
| ZFP36        | 7.84 | 9.2  | 9.28 | 8.74 | 6.84 | 6.88 | 7.12  | 7.66  |
| ACAT1        | 5.42 | 4.36 | 6.3  | 5.51 | 6.76 | 6.89 | 7.47  | 7.1   |
| PRDM4        | 6.31 | 6.15 | 6.31 | 6.68 | 6.56 | 6.89 | 7.54  | 7.16  |
| CEP85        | 7.15 | 6.29 | 6.98 | 6.91 | 7.68 | 6.89 | 7.95  | 7.29  |
| RNF8         | 6.35 | 6.36 | 6.04 | 6.76 | 6.55 | 6.89 | 7.55  | 7.55  |
| ISY1         | 7.08 | 6.47 | 7.81 | 7.76 | 7.22 | 6.89 | 7.37  | 7.65  |
| NBPF3        | 6.77 | 6.78 | 6.68 | 6.98 | 7.59 | 6.89 | 7.88  | 8.1   |
| DONSON       | 6.36 | 5.64 | 6.03 | 7.06 | 6.51 | 6.9  | 8.01  | 6.34  |
| RAD51D       | 6.39 | 5.88 | 6.28 | 6.73 | 6.51 | 6.9  | 7.08  | 6.84  |
| FYCO1        | 6.84 | 6.64 | 6.84 | 6.97 | 6.88 | 6.9  | 6.93  | 7.17  |
| C20orf96     | 6.87 | 5.82 | 6.1  | 6.99 | 5.88 | 6.9  | 7.25  | 7.22  |
| RHPN1        | 6.36 | 6.35 | 6.33 | 5.82 | 6.7  | 6.9  | 7.07  | 7.48  |
| HAUS6        | 6.54 | 6.21 | 7.07 | 8.37 | 7.41 | 6.9  | 13.1  | 10.28 |
| C19orf25     | 6.2  | 6.21 | 6.43 | 5.53 | 6.4  | 6.91 | 4.3   | 5.55  |
| STAP2        | 8.73 | 7.33 | 6.88 | 6.69 | 5.83 | 6.91 | 6.4   | 5.95  |
| GABPB1       | 6.76 | 5.52 | 6.26 | 6.55 | 6.18 | 6.91 | 7.57  | 7.18  |
| TENM3        | 6.46 | 6.39 | 6.77 | 7.39 | 6.55 | 6.91 | 8.18  | 7.21  |
| PRPF40B      | 7.3  | 7.15 | 6.89 | 6.6  | 7.74 | 6.91 | 7.66  | 8.34  |
| IL6R         | 4.87 | 6.01 | 5.5  | 5.4  | 6.26 | 6.92 | 6.72  | 6.49  |
| ARHGEF7      | 7.45 | 7.81 | 7.31 | 8.48 | 8.08 | 6.92 | 8.26  | 7.62  |
| ARG2         | 6.3  | 5.66 | 6.68 | 6.3  | 7.63 | 6.92 | 8.01  | 8.2   |
| YTHDC2       | 6.42 | 5.77 | 7.63 | 8.25 | 7.71 | 6.92 | 12.43 | 10.5  |
| SAP30        | 7.9  | 7.2  | 6.8  | 8.26 | 7.72 | 6.93 | 6.69  | 6.87  |
| GNPNAT1      | 6.48 | 6.25 | 6.93 | 7.46 | 8.54 | 6.93 | 9.8   | 9.06  |
| RNF122       | 9.41 | 9.99 | 8.13 | 8.46 | 7.43 | 6.94 | 5.86  | 6.33  |
| BRPF1        | 6.44 | 6.63 | 6.45 | 6.5  | 6.65 | 6.95 | 5.6   | 5.65  |
| DCLRE1B      | 7.27 | 6.03 | 6.08 | 6.61 | 6.75 | 6.95 | 7     | 5.73  |
| C15orf61     | 5.38 | 5.43 | 5.01 | 5.81 | 6.51 | 6.95 | 4.96  | 5.98  |
| ZFYVE1       | 6.46 | 6.51 | 5.99 | 6.39 | 5.71 | 6.95 | 6.41  | 6     |
| MANBA        | 6.56 | 6.54 | 7.13 | 7.02 | 6.67 | 6.95 | 9     | 7.59  |
| SPAST        | 5.86 | 5.98 | 7.46 | 8.79 | 6.33 | 6.95 | 10.51 | 9.72  |
| ARHGEF5      | 7.39 | 7.72 | 7.69 | 7.37 | 6.82 | 6.96 | 6.43  | 7.1   |
| XRCC4        | 6.83 | 8.06 | 7.09 | 7.55 | 7.29 | 6.96 | 8.6   | 7.75  |
| AGTPBP1      | 5.66 | 5.42 | 6.76 | 7.52 | 6.41 | 6.96 | 10.8  | 8.59  |
| TCN1         | 4.21 | 5.18 | 5.4  | 5.23 | 6.06 | 6.97 | 7.64  | 5.97  |
| PPP1R21      | 6.42 | 6.91 | 6.85 | 7.02 | 7.09 | 6.97 | 8.81  | 7.73  |
| S100A3       | 5.75 | 5.9  | 5.62 | 5.89 | 7.18 | 6.98 | 6.09  | 6.99  |
| SOCS7        | 6.48 | 6.74 | 6.74 | 6.91 | 7.13 | 6.98 | 7.06  | 7.36  |
| CLEC16A      | 6.15 | 7    | 6.43 | 6.05 | 7.76 | 6.99 | 6.25  | 6.84  |
| SLC38A9      | 6.33 | 5.72 | 6.76 | 6.97 | 7.42 | 6.99 | 10.19 | 8.48  |
| FBXW8        | 7.64 | 6.33 | 6.53 | 6.56 | 6.56 | 7    | 5.94  | 6.28  |
| NPIP4        | 5.42 | 4.18 | 6.54 | 8.24 | 5.96 | 7    | 9.55  | 8.82  |
| NCAPG        | 6.09 | 5.49 | 6.92 | 8.22 | 7.22 | 7    | 12.14 | 9.36  |
| COMMD10      | 7.24 | 7.58 | 8.81 | 8.85 | 8.26 | 7    | 9.06  | 9.37  |
| VPS37D       | 8.34 | 9.3  | 8.11 | 8.07 | 5.91 | 7.01 | 4.57  | 5.56  |
| CDC42EP2     | 6.83 | 7.27 | 7.27 | 6.81 | 6.65 | 7.01 | 5.71  | 5.78  |
| TCEAL1       | 6.3  | 4.89 | 6.32 | 6.27 | 8.5  | 7.01 | 8.4   | 7.09  |
| LMBR1L       | 6.92 | 7.92 | 7.71 | 7.78 | 7.73 | 7.01 | 7.85  | 7.41  |
| NEDD4L       | 7.13 | 7.2  | 7.41 | 7.6  | 7.47 | 7.01 | 7.95  | 7.52  |
| RUFY3        | 6.76 | 6.55 | 7.37 | 8.33 | 6.65 | 7.01 | 9.47  | 8.26  |
| KAT6A        | 7.11 | 6.57 | 7.73 | 8.17 | 7.23 | 7.01 | 9.27  | 8.3   |
| ALS2CL       | 4.83 | 4.74 | 4.49 | 5.45 | 7.14 | 7.01 | 8.6   | 8.5   |
| UBA6         | 6.84 | 5.9  | 6.55 | 8.22 | 6.38 | 7.01 | 11.4  | 9.81  |
| TRMT10C      | 8.11 | 7.54 | 7.2  | 8.22 | 8.44 | 7.01 | 12.92 | 10.03 |
| TP53RK       | 6.47 | 7.14 | 6.15 | 6.17 | 6.87 | 7.02 | 7.58  | 7.03  |
| TMTC4        | 7.08 | 7.99 | 8.16 | 8.06 | 6.7  | 7.02 | 8.57  | 8.17  |
| MAST4        | 6.56 | 6.57 | 7.12 | 7.75 | 7.17 | 7.02 | 7.94  | 8.21  |
| CHUK         | 5.41 | 4.96 | 6.33 | 6.93 | 7.44 | 7.02 | 9.32  | 8.76  |
| HEATR5B      | 5.79 | 5.48 | 6.29 | 6.92 | 7.05 | 7.02 | 9.22  | 8.77  |
| ANKRD28      | 6.28 | 5.56 | 8.07 | 8.78 | 7.38 | 7.02 | 10.83 | 9.61  |
| CASP4        | 6.33 | 6.68 | 7.43 | 7.28 | 6.67 | 7.03 | 8.15  | 5.91  |
| HAUS5        | 6.19 | 6.23 | 6.29 | 6.93 | 6.13 | 7.03 | 6.93  | 6.15  |
| FBXO46       | 6.39 | 6.84 | 6.66 | 7.04 | 6.23 | 7.03 | 6.28  | 6.3   |
| FGGY         | 7.72 | 7.65 | 8.2  | 7.58 | 7.08 | 7.03 | 8     | 6.6   |
| LTB4R2       | 4.84 | 4.22 | 4.71 | 5.9  | 6.18 | 7.03 | 8.41  | 6.68  |
| ADCY9        | 6.87 | 6.69 | 6.8  | 6.6  | 6.46 | 7.03 | 6.4   | 6.71  |
| MAGEA9B      | 9.81 | 7.54 | 7.24 | 5.88 | 4.54 | 7.03 | 5     | 6.82  |
| VIPAS39      | 7.35 | 7.13 | 6.71 | 5.98 | 7.51 | 7.03 | 8.68  | 8.73  |
| UHRF1        | 8.99 | 8.04 | 9.06 | 9.06 | 6.42 | 7.04 | 6.67  | 6.28  |
| GPR161       | 7.46 | 7.24 | 7.42 | 7.67 | 6.91 | 7.04 | 7.5   | 7.38  |

|              |       |       |       |       |      |      |       |       |
|--------------|-------|-------|-------|-------|------|------|-------|-------|
| AKR1B10      | 5.34  | 5.88  | 5.22  | 4.6   | 7.06 | 7.04 | 7.64  | 9.04  |
| UBTD2        | 7.34  | 7.09  | 8.63  | 8.13  | 7.95 | 7.04 | 9.45  | 9.09  |
| HERC4        | 6.19  | 6.41  | 6.97  | 7.78  | 8.04 | 7.04 | 11.17 | 10.31 |
| BCL6         | 7.74  | 7.37  | 8.79  | 8.32  | 6.77 | 7.05 | 8.03  | 7.52  |
| TXLNG        | 5.64  | 5.1   | 7     | 7.47  | 7.17 | 7.05 | 10.32 | 8.86  |
| P2RY11       | 6.41  | 4.96  | 5.71  | 4.86  | 5.69 | 7.06 | 7.24  | 5.03  |
| MAOA         | 6.09  | 6.52  | 6.42  | 6.72  | 6.97 | 7.06 | 7.73  | 7.2   |
| CASP8        | 7.64  | 6.91  | 6.88  | 8.18  | 8.36 | 7.06 | 9.94  | 7.86  |
| MED6         | 6.59  | 6.27  | 7.43  | 7.48  | 7.66 | 7.06 | 8.49  | 7.99  |
| RSBN1L       | 6.94  | 6.86  | 8.15  | 8.18  | 7.94 | 7.06 | 9.65  | 9.24  |
| AGL          | 6.59  | 6.11  | 7.47  | 8.59  | 7.24 | 7.06 | 12.04 | 10.21 |
| KIAA1147     | 6.32  | 5.96  | 6.75  | 7.94  | 7.98 | 7.06 | 11.91 | 10.37 |
| STOML1       | 7.15  | 7.17  | 6.92  | 7.09  | 7.61 | 7.07 | 5.52  | 5.7   |
| UQCC3        | 11.64 | 11.5  | 11.09 | 10.77 | 6.27 | 7.07 | 4.79  | 5.95  |
| EGFL7        | 8.59  | 9.09  | 7.47  | 7.13  | 6.6  | 7.07 | 5.34  | 6.05  |
| ALDH3B1      | 6.23  | 6.9   | 6.02  | 5.94  | 7.45 | 7.07 | 7.02  | 6.65  |
| GNL3L        | 6.22  | 6.72  | 6.6   | 6.39  | 7.18 | 7.07 | 6.87  | 7.44  |
| TMEM251      | 7.14  | 5.73  | 5.29  | 7.49  | 6.07 | 7.07 | 7.61  | 7.56  |
| C1orf216     | 6.45  | 7.36  | 6.86  | 7.26  | 7.43 | 7.07 | 6.92  | 8.04  |
| ETNK1        | 6.1   | 6.05  | 7.23  | 7.04  | 6.79 | 7.07 | 9.57  | 8.73  |
| UBE2E2       | 5.94  | 6.66  | 7.26  | 6.37  | 7.03 | 7.08 | 7.27  | 6.84  |
| PIGH         | 6.32  | 6.26  | 6.62  | 5.93  | 7.34 | 7.08 | 7.57  | 7.21  |
| SIRT5        | 7.55  | 6.94  | 8.38  | 7.5   | 6.95 | 7.08 | 8.93  | 8.31  |
| COMMD2       | 6.15  | 5.69  | 6.43  | 7.73  | 6.91 | 7.08 | 10.66 | 8.7   |
| SPRYD7       | 7.34  | 6.82  | 7.64  | 8.06  | 7.84 | 7.08 | 9.03  | 9.06  |
| SLC4A7       | 6.63  | 6.42  | 6.83  | 8.44  | 7.8  | 7.08 | 13.08 | 10.8  |
| PRPF4B       | 5.93  | 6.19  | 7.02  | 8.31  | 6.8  | 7.09 | 11.78 | 10.28 |
| SRGAP2C      | 6.52  | 7.31  | 6.83  | 8.5   | 7.23 | 7.09 | 10.73 | 10.62 |
| CEP78        | 5.42  | 5.01  | 5.89  | 6.91  | 7.17 | 7.1  | 8.65  | 7.53  |
| TFEB         | 6.55  | 6.36  | 5.67  | 5.78  | 6.25 | 7.11 | 5.61  | 5.33  |
| RSG1         | 5.98  | 5.89  | 6.07  | 4.99  | 6.68 | 7.11 | 5.39  | 6.11  |
| CNNM4        | 7.13  | 6.52  | 6.01  | 6.6   | 6.54 | 7.11 | 5.9   | 6.19  |
| CCL2         | 7.17  | 6.65  | 7.78  | 9.72  | 6.22 | 7.11 | 8.13  | 6.29  |
| ABHD6        | 7.66  | 7.79  | 7.23  | 7.7   | 8.12 | 7.11 | 6.78  | 6.6   |
| EFHD1        | 9.1   | 10.59 | 9.12  | 8.46  | 7.77 | 7.11 | 7.3   | 8.2   |
| FAM134B      | 7.34  | 6.12  | 7.44  | 6.96  | 7.15 | 7.11 | 9.12  | 8.63  |
| ARMT1        | 6.59  | 7.14  | 7.94  | 8.15  | 8.52 | 7.11 | 11.39 | 9.96  |
| RBFA         | 6.42  | 6.36  | 6.57  | 6.46  | 7.63 | 7.12 | 6.16  | 7.08  |
| MSH5         | 6.1   | 5.19  | 5.82  | 6.37  | 6.77 | 7.12 | 9.09  | 7.37  |
| C19orf12     | 6.52  | 6.58  | 6.57  | 6.51  | 7.09 | 7.12 | 7.32  | 7.49  |
| ZNF609       | 7.85  | 8.78  | 8.74  | 8.51  | 7.81 | 7.12 | 7.94  | 7.9   |
| RAVER2       | 6.99  | 5.92  | 6.56  | 7.14  | 7.71 | 7.12 | 8.29  | 7.97  |
| DLGAP5       | 5.52  | 5.19  | 5.89  | 5.96  | 6.95 | 7.12 | 10.6  | 9.13  |
| TYRO3        | 7.13  | 7.75  | 7.36  | 6.65  | 6.82 | 7.13 | 6.67  | 6.64  |
| BTD          | 6.37  | 7.01  | 6.59  | 6.82  | 7.6  | 7.13 | 7.71  | 7.2   |
| EYA3         | 6.84  | 7.07  | 8.01  | 7.77  | 7.51 | 7.13 | 9.84  | 9.01  |
| RAB18        | 5.76  | 5.37  | 6.93  | 7.28  | 7.34 | 7.13 | 11.35 | 9.14  |
| FBXO3        | 6.18  | 5.63  | 7.73  | 8.16  | 8.21 | 7.13 | 11.22 | 9.77  |
| WNT5B        | 8.29  | 8.71  | 8.02  | 8.13  | 6.52 | 7.14 | 5.06  | 6.31  |
| GATB         | 6.02  | 6.09  | 5.52  | 6.02  | 7.2  | 7.14 | 7.13  | 7.01  |
| NICN1        | 5.92  | 6.57  | 6.26  | 6.04  | 6.35 | 7.14 | 7.36  | 7.17  |
| DCAF5        | 7.74  | 7.78  | 7.91  | 8.73  | 6.86 | 7.14 | 7.61  | 7.84  |
| DHX35        | 6.89  | 7.46  | 7.47  | 6.96  | 7.71 | 7.14 | 8.21  | 8.44  |
| KLHL24       | 6.93  | 7.38  | 7.93  | 9.86  | 7.17 | 7.14 | 11.94 | 11.99 |
| CABLES2      | 7.81  | 8.33  | 8.39  | 7.12  | 6.93 | 7.15 | 6.05  | 6.63  |
| NDUFAF1      | 7.98  | 7.46  | 7.52  | 7.68  | 8.8  | 7.15 | 8.84  | 8.17  |
| OXR1         | 6.82  | 6.56  | 6.87  | 8.6   | 7.58 | 7.15 | 11.2  | 9.49  |
| KIF11        | 6     | 5.06  | 6.95  | 8.78  | 7.4  | 7.15 | 13.26 | 10.91 |
| BUB1B        | 5.53  | 5.1   | 5.96  | 6.2   | 7.12 | 7.16 | 9.74  | 7.86  |
| XIAP         | 7.15  | 6.75  | 8.14  | 9.35  | 7.23 | 7.16 | 10.62 | 9.59  |
| PTBP3        | 6.14  | 5.74  | 6.87  | 7.8   | 7.64 | 7.16 | 12.34 | 9.96  |
| EVPL         | 7.14  | 7     | 6.59  | 6.43  | 6.89 | 7.17 | 5.96  | 6.58  |
| TRMT2B       | 5.87  | 6.53  | 6.29  | 6.47  | 6.91 | 7.17 | 6.97  | 7.77  |
| ERC1         | 6.77  | 6.81  | 7.33  | 7.03  | 6.89 | 7.17 | 8.52  | 7.95  |
| APBA3        | 7.27  | 7.19  | 6.52  | 6.33  | 7.57 | 7.18 | 5.38  | 5.56  |
| FANCC        | 7.89  | 7.77  | 8.99  | 8.12  | 7.53 | 7.18 | 8.07  | 7.66  |
| PKP2         | 7.08  | 6.35  | 7.76  | 7.25  | 7.59 | 7.18 | 8.61  | 7.76  |
| SLC25A40     | 6.41  | 6.16  | 7.3   | 7.41  | 7.17 | 7.18 | 11.2  | 9.22  |
| MNT          | 7.19  | 6.77  | 6.59  | 6.86  | 7.34 | 7.19 | 6.23  | 6.42  |
| NET1         | 6.2   | 5.81  | 7.1   | 7.51  | 7.39 | 7.19 | 9.25  | 8.09  |
| SLC35C1      | 7.75  | 7.8   | 6.45  | 8     | 9.11 | 7.19 | 6.93  | 8.97  |
| S1PR5        | 8.37  | 8.04  | 8.45  | 7.45  | 6.97 | 7.2  | 5.37  | 5.83  |
| FUK          | 7.13  | 7.15  | 6.71  | 5.93  | 6.57 | 7.2  | 5.58  | 5.88  |
| OXCT1        | 5.88  | 5.5   | 6.18  | 6.65  | 7.25 | 7.2  | 9.02  | 7.23  |
| NOL9         | 6.77  | 6.51  | 6.63  | 6.28  | 7.57 | 7.2  | 8.27  | 7.95  |
| TMEM186      | 6.69  | 7.38  | 7.24  | 7.78  | 8.49 | 7.2  | 7.25  | 8.1   |
| TMEM168      | 5.92  | 5.38  | 6.96  | 7.71  | 7.31 | 7.2  | 10.95 | 10.04 |
| ARL17B       | 6.96  | 8.45  | 5.67  | 5.93  | 5.89 | 7.21 | 3.67  | 5.52  |
| POPDC3       | 5.79  | 5.71  | 6.25  | 7.27  | 6.29 | 7.21 | 7.04  | 7.05  |
| FLRT2        | 8.7   | 7.68  | 9.15  | 9.61  | 7.68 | 7.21 | 9.34  | 9.17  |
| TMEM55A      | 8.33  | 6.54  | 8.49  | 8.16  | 7.21 | 7.22 | 8.14  | 8.78  |
| TPP2         | 5.85  | 5.76  | 6.94  | 8.19  | 7.91 | 7.22 | 10.8  | 9.48  |
| MKL2         | 6.85  | 6.43  | 7.95  | 8.45  | 7.55 | 7.22 | 10.2  | 10.01 |
| EEPDI1       | 6.9   | 6.44  | 6.83  | 6.89  | 6.92 | 7.23 | 4.91  | 5.05  |
| LOC107985803 | 7.2   | 6.08  | 6.19  | 7.03  | 7.19 | 7.23 | 6.11  | 5.78  |
| GLB1L2       | 6.94  | 7.85  | 6.6   | 6.4   | 7.44 | 7.23 | 5.99  | 5.84  |
| PTGS1        | 8.33  | 9.7   | 7.88  | 8.38  | 6.9  | 7.23 | 7.02  | 8.62  |



|              |       |       |       |       |      |      |       |       |
|--------------|-------|-------|-------|-------|------|------|-------|-------|
| DOHH         | 7.97  | 6.69  | 6.31  | 6.13  | 8.59 | 7.24 | 5.63  | 6.35  |
| NECAP1       | 6.17  | 6.25  | 6.63  | 6.71  | 6.96 | 7.24 | 8.08  | 7.96  |
| STRBP        | 6.19  | 5.91  | 6.9   | 8.01  | 7.73 | 7.24 | 10.89 | 8.78  |
| ZBTB5        | 6.8   | 7.02  | 6.78  | 7.24  | 7.05 | 7.25 | 8.33  | 7.56  |
| SBNO1        | 5.27  | 5.2   | 6.99  | 8.28  | 7.03 | 7.25 | 10.79 | 9.81  |
| TTCTA        | 7.02  | 7.3   | 7.08  | 6.72  | 6.59 | 7.26 | 6.18  | 5.86  |
| ZNF205       | 7.79  | 7.23  | 7.86  | 6.97  | 6.85 | 7.27 | 5.19  | 6.48  |
| RNF115       | 7.42  | 7.88  | 7.25  | 8.64  | 6.45 | 7.27 | 6.19  | 6.81  |
| WDR90        | 7.02  | 6.43  | 6.69  | 7.28  | 6.71 | 7.27 | 7.16  | 7.09  |
| UBIAD1       | 7.61  | 7.76  | 6.94  | 7.44  | 8.03 | 7.27 | 7.45  | 7.57  |
| PMS1         | 6.78  | 6.42  | 7.66  | 9.18  | 7.68 | 7.27 | 12.79 | 10    |
| LOC100507507 | 7.18  | 7.31  | 7.02  | 7.17  | 5.9  | 7.28 | 5.45  | 6.31  |
| UBE2Q2       | 5.63  | 5.39  | 6.78  | 6.48  | 6.48 | 7.28 | 6.55  | 6.41  |
| PAFAH2       | 7.11  | 7.26  | 6.92  | 6.85  | 7.67 | 7.28 | 7.63  | 7.16  |
| MCPH1        | 6.55  | 6.46  | 6.94  | 6.98  | 6.72 | 7.28 | 8.98  | 7.38  |
| MTMR3        | 7.85  | 7.8   | 7.97  | 7.92  | 7.67 | 7.28 | 8.09  | 7.62  |
| NREP         | 10.07 | 9     | 10.05 | 10.6  | 6.3  | 7.28 | 7.94  | 7.89  |
| COL9A2       | 6.5   | 7.33  | 7.31  | 6.7   | 7.33 | 7.28 | 6.71  | 7.99  |
| RAD1         | 7.07  | 6.99  | 6.97  | 7.11  | 7.28 | 7.28 | 8.87  | 8.37  |
| KRIT1        | 5.86  | 5.79  | 7.31  | 8.05  | 6.68 | 7.28 | 14.8  | 11.07 |
| KLHL5        | 6.54  | 5.95  | 6.92  | 8.4   | 7.3  | 7.29 | 8.78  | 8.29  |
| TDG          | 6.04  | 5.94  | 7.1   | 7.14  | 7.78 | 7.29 | 11.09 | 9.41  |
| ARL5A        | 6.93  | 6.54  | 6.27  | 7.05  | 7.49 | 7.29 | 12.83 | 9.68  |
| MBTPS2       | 7.05  | 6.54  | 8.29  | 9.23  | 8.53 | 7.29 | 12.44 | 10.12 |
| TBC1D25      | 6.59  | 6.72  | 6.7   | 6.73  | 6.9  | 7.3  | 6.28  | 6.67  |
| PADI3        | 9.3   | 10.09 | 9.28  | 7.93  | 7.11 | 7.3  | 5.86  | 6.7   |
| IQGAP3       | 6.06  | 6.24  | 6.21  | 5.77  | 7.41 | 7.3  | 7.86  | 7.05  |
| NSMAF        | 7.33  | 6.67  | 7.02  | 6.69  | 6.92 | 7.3  | 8.48  | 7.98  |
| QTRT2        | 6.37  | 5.36  | 6.54  | 6.52  | 7.12 | 7.3  | 8.91  | 8.23  |
| PKN2         | 6.71  | 6.52  | 7.71  | 9.29  | 7.97 | 7.3  | 12.89 | 11.59 |
| LRRC57       | 7.04  | 6.02  | 7.61  | 7.55  | 7.09 | 7.31 | 8.22  | 7.9   |
| GEMIN7       | 7.95  | 8.46  | 8.67  | 7.04  | 7.3  | 7.31 | 6.47  | 7.92  |
| ABHD17C      | 6.38  | 6.27  | 6.51  | 6.34  | 8.19 | 7.31 | 8.25  | 7.97  |
| BORCS6       | 5.96  | 6.04  | 5.86  | 5.24  | 6.53 | 7.32 | 4.61  | 5.65  |
| MED26        | 7.82  | 7.23  | 6.79  | 6.82  | 6.81 | 7.32 | 5.45  | 6.45  |
| NBAS         | 7.26  | 6.96  | 7.18  | 6.59  | 7.24 | 7.32 | 8.03  | 7.13  |
| ZNF830       | 6.94  | 6.47  | 6.47  | 6.95  | 6.28 | 7.32 | 7.79  | 7.2   |
| UCN2         | 6.42  | 5.66  | 6.74  | 7.28  | 6.54 | 7.32 | 8.56  | 7.28  |
| MTO1         | 5.56  | 5.43  | 7.01  | 6.69  | 8.26 | 7.32 | 8.31  | 7.46  |
| SLC30A7      | 6.18  | 5.65  | 5.99  | 8.21  | 6.79 | 7.32 | 10.26 | 7.96  |
| ABCB7        | 6.91  | 6.68  | 6.99  | 6.87  | 7.12 | 7.32 | 9.21  | 8.22  |
| DNAJC22      | 7.95  | 7.64  | 7.12  | 7.77  | 7.45 | 7.32 | 8.29  | 8.7   |
| LMNTD2       | 7.66  | 7.89  | 6.83  | 6.78  | 6.54 | 7.33 | 6.56  | 6.78  |
| FAM173B      | 6.37  | 6.31  | 7.1   | 7.61  | 6.93 | 7.34 | 9.72  | 8.53  |
| ATAT1        | 8.83  | 8.37  | 8.9   | 8.78  | 9.02 | 7.34 | 9.26  | 8.89  |
| SHQ1         | 6.15  | 6.2   | 6.91  | 6.59  | 5.99 | 7.35 | 7.11  | 6.25  |
| MLYCD        | 7.03  | 6.99  | 6.9   | 7.08  | 7.67 | 7.35 | 5.83  | 6.28  |
| TRPM4        | 7.07  | 7.25  | 6.24  | 6.54  | 6.99 | 7.35 | 7.01  | 6.33  |
| TRIM62       | 7.62  | 8.45  | 7.84  | 8.08  | 6.7  | 7.35 | 6.19  | 6.7   |
| FAM193A      | 7.51  | 7.84  | 8.16  | 7.78  | 7.12 | 7.35 | 6.93  | 7.41  |
| MAP3K7       | 6.22  | 6.14  | 7.34  | 8.35  | 7.3  | 7.35 | 11.51 | 9.02  |
| ZMYM2        | 7.52  | 7.08  | 8.67  | 10.01 | 7.49 | 7.35 | 12.13 | 11.79 |
| PIP4K2A      | 7.99  | 7.25  | 7.34  | 7.88  | 7.65 | 7.36 | 8.69  | 8.58  |
| DOCK4        | 6.64  | 5.86  | 7.32  | 8.76  | 7.21 | 7.36 | 10.11 | 8.77  |
| DTX3L        | 11.25 | 11.39 | 13.46 | 14.4  | 8.33 | 7.36 | 11.22 | 8.95  |
| TAF1B        | 7.6   | 7.21  | 7.5   | 8.75  | 8.19 | 7.36 | 11.78 | 9.48  |
| SMC5         | 5.21  | 5.13  | 6.73  | 7.8   | 6.37 | 7.36 | 13.72 | 10.32 |
| PSD3         | 5.81  | 5.04  | 6.42  | 8.13  | 7.42 | 7.36 | 11.53 | 10.38 |
| APLP1        | 4.87  | 5.65  | 4.97  | 4.99  | 7.23 | 7.37 | 6.12  | 6.1   |
| MFSD2A       | 5.89  | 5.72  | 4.8   | 6.04  | 5.8  | 7.37 | 4.83  | 6.19  |
| DAGLB        | 7.61  | 8.12  | 7.57  | 6.89  | 7.98 | 7.37 | 6.47  | 7.1   |
| MCTP2        | 6.15  | 6.55  | 6.81  | 8.31  | 7.91 | 7.37 | 9.95  | 9.11  |
| AP1S2        | 8.23  | 6.81  | 8.79  | 9.04  | 9.23 | 7.37 | 12.79 | 10.14 |
| LRRC28       | 7.24  | 7.39  | 8.11  | 6.87  | 6.88 | 7.38 | 7.19  | 7.88  |
| UTP3         | 6.21  | 6.05  | 7.55  | 7.5   | 8.34 | 7.38 | 9.48  | 8.23  |
| GUF1         | 5.76  | 5.56  | 6.34  | 7.26  | 7.51 | 7.38 | 12.61 | 9.79  |
| ISG20        | 8.43  | 6.81  | 7.78  | 7.13  | 6.92 | 7.39 | 6.09  | 5.86  |
| CSTF2T       | 8     | 7.93  | 8.15  | 8.3   | 8.09 | 7.39 | 8.15  | 8.01  |
| CMC4         | 9.5   | 10.55 | 9.21  | 10.88 | 9.34 | 7.39 | 7.69  | 8.45  |
| MOCS2        | 7.2   | 5.54  | 6.74  | 7.2   | 8.7  | 7.39 | 11.3  | 8.57  |
| LSM6         | 7.36  | 7.92  | 7.72  | 6.93  | 7.81 | 7.39 | 8     | 8.62  |
| PHF21A       | 8.51  | 8.02  | 8.43  | 8.79  | 7.66 | 7.39 | 8.69  | 8.85  |
| ZWILCH       | 6.45  | 5.95  | 7.38  | 7.27  | 7.75 | 7.39 | 12.64 | 10.21 |
| ODF2L        | 6.21  | 5.48  | 6.49  | 8.49  | 6.73 | 7.39 | 13.27 | 10.83 |
| ZNF785       | 6.56  | 7.22  | 7.34  | 7.5   | 6.52 | 7.4  | 7.51  | 7.07  |
| IGHMBP2      | 7.4   | 8.42  | 7.61  | 7.65  | 7.29 | 7.4  | 7.04  | 7.21  |
| ANKFY1       | 7.18  | 7.01  | 7.68  | 7.76  | 7.12 | 7.4  | 7.88  | 7.21  |
| EIF1AD       | 6.99  | 6.59  | 7.17  | 7.67  | 7.62 | 7.4  | 7.75  | 7.39  |
| SUPT7L       | 6.25  | 6.41  | 6.76  | 8.27  | 7.57 | 7.4  | 9.95  | 8.99  |
| UNC13D       | 7.97  | 7.37  | 6.29  | 6.5   | 7.25 | 7.41 | 6.31  | 6.56  |
| DMPK         | 6.64  | 6.43  | 6.6   | 7.24  | 7.15 | 7.41 | 6.14  | 6.78  |
| ZNF584       | 7.27  | 7.88  | 7.44  | 6.83  | 7.56 | 7.41 | 7.42  | 7.58  |
| RCOR1        | 6.91  | 7.19  | 7.62  | 7.96  | 7.25 | 7.41 | 7.95  | 7.74  |
| DRAM1        | 5.42  | 4.8   | 5.83  | 6.28  | 8.71 | 7.41 | 9.76  | 8.81  |
| RABEP2       | 8.01  | 8.06  | 7.59  | 7.3   | 8.37 | 7.42 | 6     | 7.52  |
| APBB2        | 7.79  | 6.41  | 7.06  | 8.26  | 7.1  | 7.42 | 8.71  | 7.54  |
| STX7         | 6.58  | 6.49  | 7.38  | 9.28  | 7.89 | 7.42 | 10.51 | 8.82  |
| HOXA10       | 6.81  | 6.61  | 6.47  | 6.98  | 7.77 | 7.43 | 7.7   | 8.11  |

|          |       |       |       |       |       |      |       |       |
|----------|-------|-------|-------|-------|-------|------|-------|-------|
| RALGAPA2 | 7.87  | 7.77  | 8     | 8.17  | 7.56  | 7.43 | 8.58  | 8.8   |
| DDX58    | 13.56 | 11.56 | 14.67 | 17.84 | 7.24  | 7.43 | 11.77 | 9.63  |
| ZBED6    | 6.52  | 5.43  | 7.26  | 10.14 | 7.09  | 7.43 | 12.31 | 12.64 |
| ACAD11   | 6.25  | 6.63  | 6.85  | 7.25  | 7.35  | 7.44 | 9.01  | 8.69  |
| CCDC59   | 6.32  | 8.13  | 7.25  | 7.93  | 8.01  | 7.44 | 10.5  | 8.79  |
| RGS17    | 6.99  | 5.53  | 6.99  | 8.17  | 7.22  | 7.44 | 11.18 | 9.2   |
| GMFB     | 6.84  | 7.58  | 6.72  | 7.57  | 7.78  | 7.44 | 11.23 | 9.91  |
| SHISA3   | 7.3   | 7.01  | 7.16  | 7.57  | 7.33  | 7.45 | 6.68  | 5.43  |
| SLC45A3  | 6.9   | 7.48  | 6.16  | 7.14  | 6.99  | 7.45 | 6.31  | 6.29  |
| HEATR3   | 6.23  | 5.6   | 5.72  | 5.03  | 6.99  | 7.45 | 6.93  | 6.85  |
| BLOC1S3  | 6.47  | 5.8   | 6.03  | 5.66  | 6.58  | 7.45 | 6.05  | 6.89  |
| UCN      | 6.13  | 5.95  | 6.88  | 6.01  | 7.75  | 7.45 | 7.06  | 7.81  |
| MOB3C    | 8.23  | 8.46  | 8.07  | 7.99  | 7.92  | 7.45 | 7.25  | 7.85  |
| RBM33    | 5.92  | 5.94  | 6.92  | 8.01  | 7.53  | 7.45 | 9.84  | 9.41  |
| TNIP3    | 5.73  | 5.78  | 7.02  | 9.12  | 6.71  | 7.45 | 14.27 | 11.28 |
| ZNF628   | 5.87  | 5.57  | 5.26  | 5.04  | 7.12  | 7.46 | 4.83  | 5.24  |
| TMEM102  | 8.46  | 8.71  | 8.36  | 7.15  | 7.24  | 7.46 | 5.95  | 6.25  |
| BACE2    | 7.67  | 7.19  | 7.38  | 6.92  | 6.78  | 7.46 | 7.5   | 7.14  |
| INTS7    | 8.24  | 6.96  | 8.03  | 7.95  | 8     | 7.46 | 9.49  | 8.18  |
| CROCC    | 7.04  | 6.92  | 7.03  | 7.76  | 7.39  | 7.46 | 7.57  | 8.19  |
| INIP     | 6.68  | 7.12  | 8.11  | 7.61  | 7.85  | 7.46 | 9.94  | 8.72  |
| TFCP2    | 8.43  | 7.32  | 8.05  | 8.92  | 7.94  | 7.46 | 10.54 | 8.86  |
| UBXN2B   | 6.17  | 5.59  | 8.09  | 9.59  | 8.84  | 7.46 | 11.49 | 9.66  |
| KRCC1    | 9.1   | 8.93  | 9.12  | 9.79  | 8.04  | 7.46 | 10.59 | 10.17 |
| MCM8     | 7.25  | 5.59  | 8.2   | 9.48  | 7.68  | 7.47 | 12.35 | 9.61  |
| CREBZF   | 6.69  | 6.85  | 7.36  | 8.55  | 7.23  | 7.47 | 12.04 | 10.34 |
| PAK1IP1  | 6.86  | 7.32  | 7.03  | 9.59  | 10.02 | 7.47 | 12.09 | 10.67 |
| CDK8     | 6.16  | 5.45  | 6.88  | 6.73  | 7.7   | 7.48 | 8.4   | 7.74  |
| PLEKHG2  | 8.11  | 8.13  | 7.71  | 8.57  | 7.09  | 7.48 | 6.84  | 7.92  |
| FAM133B  | 6.67  | 7.32  | 8.31  | 9.05  | 8.11  | 7.48 | 11.79 | 10.62 |
| C16orf59 | 7.59  | 5.99  | 6.42  | 5.79  | 7.88  | 7.49 | 6.32  | 5.2   |
| KLHL29   | 8.11  | 7.27  | 7.27  | 8.08  | 7.82  | 7.49 | 7.21  | 8.06  |
| SETX     | 7.07  | 6.31  | 9.03  | 11.23 | 8.15  | 7.49 | 13.16 | 12.21 |
| CAPG     | 7.6   | 7.13  | 7.09  | 7.45  | 6.89  | 7.5  | 5.41  | 6.28  |
| RABEP1   | 6     | 4.85  | 7.57  | 7.02  | 8.15  | 7.5  | 8.96  | 7.99  |
| KATNA1   | 7.44  | 7.26  | 8.23  | 7.87  | 8.45  | 7.5  | 9.77  | 8.36  |
| TMEM45A  | 10.67 | 9.91  | 11.25 | 9.87  | 6.95  | 7.5  | 10.24 | 8.75  |
| MYO6     | 6.5   | 6.01  | 7.92  | 8.64  | 7.1   | 7.51 | 11.01 | 10    |
| PPP2R3B  | 7.76  | 6.46  | 5.97  | 7     | 7.98  | 7.52 | 6.54  | 6.4   |
| ZNF74    | 7.63  | 7.14  | 7.91  | 6.82  | 8.2   | 7.52 | 6.55  | 7.53  |
| TMEM19   | 6.37  | 6.12  | 6.66  | 6.58  | 7.6   | 7.52 | 8.61  | 7.72  |
| RPS6KA2  | 7.86  | 8.11  | 8.08  | 7.52  | 8.3   | 7.52 | 7.16  | 7.87  |
| IPO11    | 7.17  | 5.56  | 7.66  | 7.47  | 8.51  | 7.52 | 10.07 | 8.98  |
| STX3     | 6.04  | 6.24  | 7.27  | 6.24  | 7.65  | 7.52 | 7.6   | 9.33  |
| PTPN2    | 6.52  | 7.12  | 7.7   | 9.47  | 7.9   | 7.52 | 11.85 | 9.45  |
| LPAR6    | 9.43  | 9.17  | 9.27  | 9.71  | 7.59  | 7.52 | 11.33 | 9.92  |
| MKLN1    | 8.89  | 6.67  | 8.74  | 9.33  | 8.69  | 7.52 | 12.99 | 11.41 |
| F12      | 7.36  | 8.33  | 6.87  | 7.42  | 8.18  | 7.53 | 5.6   | 5.99  |
| TRIM68   | 8.28  | 8.41  | 7.85  | 8.17  | 7.56  | 7.53 | 6.37  | 6.89  |
| PLRG1    | 7.52  | 7.54  | 8.1   | 8.65  | 8.51  | 7.53 | 10.89 | 9.47  |
| FAM199X  | 6.65  | 6.5   | 8.15  | 9.54  | 7.42  | 7.53 | 12.97 | 11    |
| ABHD17B  | 6.5   | 6.99  | 7.79  | 8.69  | 7.92  | 7.54 | 6.13  | 7.89  |
| SBF2     | 5.97  | 5.92  | 6.99  | 8.02  | 7.15  | 7.54 | 10.94 | 8.74  |
| RPP38    | 7.58  | 8.7   | 7.79  | 8.82  | 8.39  | 7.54 | 9.19  | 8.81  |
| RSF1     | 6.7   | 6.53  | 8.31  | 10.5  | 7.44  | 7.54 | 12.95 | 11.31 |
| BRSK1    | 7.38  | 6.99  | 7.59  | 7.3   | 7.83  | 7.55 | 6.68  | 7.16  |
| DDX31    | 6.66  | 7.59  | 7.26  | 7.41  | 8.21  | 7.56 | 8.78  | 7.32  |
| CCNJL    | 8.27  | 8.68  | 8.34  | 8.48  | 7.58  | 7.56 | 7.24  | 7.37  |
| SPATA2   | 7.63  | 7.81  | 7.22  | 7.44  | 7.66  | 7.56 | 6.6   | 8     |
| SPRED1   | 7.84  | 6.71  | 8.47  | 9.53  | 7.56  | 7.56 | 10.49 | 9.63  |
| MYPOP    | 6.65  | 7.23  | 7.38  | 5.67  | 6.99  | 7.57 | 6.15  | 7.02  |
| AGA      | 6.09  | 6.86  | 7.64  | 7.08  | 7.42  | 7.57 | 11.05 | 8.37  |
| MTERF3   | 6.38  | 6.85  | 7.55  | 8.44  | 7.98  | 7.57 | 12.55 | 9.3   |
| SLC35B3  | 7.01  | 6.58  | 6.7   | 7.54  | 6.67  | 7.57 | 10.62 | 9.35  |
| SFT2D3   | 8.33  | 7.53  | 7.53  | 7.57  | 7.56  | 7.58 | 7.02  | 6.27  |
| CLCN2    | 7.73  | 8.38  | 8.02  | 7.88  | 7.57  | 7.58 | 7.22  | 7.25  |
| TRMT61B  | 6.35  | 6.56  | 5.95  | 7.84  | 7.45  | 7.58 | 8.86  | 7.96  |
| CNOT4    | 7.48  | 7.57  | 8.25  | 9.4   | 7.95  | 7.58 | 9.3   | 8.13  |
| DDX28    | 6.54  | 6.51  | 6.39  | 5.87  | 7.71  | 7.59 | 6.02  | 6.5   |
| AGPS     | 6.2   | 5.73  | 6.95  | 8.13  | 7.92  | 7.59 | 12.03 | 10.61 |
| PARVB    | 6.91  | 7.56  | 7     | 7.72  | 7.43  | 7.6  | 6.45  | 5.82  |
| SDSL     | 8.07  | 8.09  | 8.4   | 8.01  | 7.75  | 7.6  | 5.51  | 6.69  |
| ZNF689   | 7.49  | 7.87  | 6.86  | 6.61  | 7.55  | 7.6  | 6.43  | 7.35  |
| VPRBP    | 7.25  | 7.41  | 7.32  | 7.64  | 8.25  | 7.6  | 9.12  | 8.06  |
| CHST9    | 5.98  | 7.05  | 7.19  | 7.92  | 7.1   | 7.6  | 10.07 | 9.35  |
| MAFF     | 7.77  | 7.78  | 7.85  | 7.84  | 7.1   | 7.61 | 6.21  | 6.14  |
| CBX7     | 7.48  | 7.5   | 7.84  | 7.34  | 7.87  | 7.61 | 7.66  | 7.31  |
| TAMM41   | 7.67  | 6.62  | 6.74  | 6.57  | 6.87  | 7.61 | 8.05  | 7.72  |
| HSD17B14 | 6.06  | 6.19  | 5.88  | 6.44  | 6.78  | 7.62 | 6.75  | 6.6   |
| ANKRD13A | 6.75  | 7.11  | 6.55  | 6.52  | 8.5   | 7.62 | 8.99  | 8.02  |
| ABCB10   | 6.01  | 5.86  | 6.71  | 7.65  | 7.05  | 7.62 | 9.26  | 8.21  |
| CHMP2B   | 5.86  | 6.89  | 6.05  | 8.54  | 7.82  | 7.62 | 9.27  | 8.53  |
| WDR73    | 8.41  | 8.33  | 7.89  | 7.71  | 8.53  | 7.62 | 8.77  | 9.12  |
| AMH      | 5.99  | 5.48  | 6     | 6.25  | 6.44  | 7.63 | 8.23  | 7.08  |
| GJC1     | 6.7   | 6.9   | 7.52  | 7.34  | 7.63  | 7.63 | 8.12  | 8.09  |

|          |       |       |       |       |      |      |       |       |
|----------|-------|-------|-------|-------|------|------|-------|-------|
| CYB5R4   | 5.99  | 5.56  | 6.39  | 6.9   | 7.77 | 7.63 | 10.04 | 10.12 |
| TIMM22   | 7.17  | 7.18  | 7.62  | 6.66  | 7.86 | 7.64 | 7.26  | 7.54  |
| ZMYND11  | 7.85  | 6.59  | 7.81  | 8.39  | 7.71 | 7.64 | 10.27 | 8.2   |
| PSTPIP2  | 10.02 | 9.54  | 9.9   | 10.43 | 8.92 | 7.64 | 11.14 | 10.13 |
| HOXB2    | 6.64  | 8.64  | 8.93  | 6.29  | 6.54 | 7.65 | 5.84  | 6.69  |
| WASF1    | 7.46  | 7.08  | 9.15  | 9.5   | 8.56 | 7.65 | 10.63 | 10.05 |
| CRBN     | 6.08  | 7.68  | 6.2   | 8.23  | 7.29 | 7.66 | 10.42 | 8.53  |
| LPIN3    | 7.3   | 6.76  | 7.2   | 7.13  | 7.25 | 7.66 | 8.82  | 8.64  |
| SLC8B1   | 6.9   | 7.02  | 7.64  | 6.35  | 8.47 | 7.67 | 6.98  | 7.19  |
| EME1     | 7.46  | 7.58  | 6.84  | 6.75  | 8.57 | 7.67 | 8.68  | 7.98  |
| JARID2   | 8.04  | 7.94  | 8     | 9.07  | 7.14 | 7.67 | 7.76  | 8.38  |
| UGCG     | 6.71  | 6.21  | 8.05  | 8.71  | 8.16 | 7.67 | 10.98 | 9.75  |
| ATG10    | 7.38  | 8.16  | 10.18 | 9.82  | 8.12 | 7.68 | 9.83  | 9.71  |
| PI4K2B   | 7.14  | 7.09  | 8.97  | 9.4   | 8.73 | 7.68 | 11.71 | 9.9   |
| PPP1R12A | 6.04  | 6.45  | 7.45  | 9.01  | 7.99 | 7.68 | 11.51 | 10.64 |
| PARVA    | 7.98  | 7.8   | 8.09  | 7.91  | 8.33 | 7.69 | 8.38  | 7.89  |
| ATP6V1A  | 6.5   | 5.51  | 7.46  | 7.65  | 7.73 | 7.69 | 11.43 | 8.78  |
| EIF4E    | 6.85  | 7.8   | 7.77  | 8.28  | 8.62 | 7.69 | 10.09 | 9.41  |
| BBX      | 7.15  | 6.25  | 8.65  | 10.46 | 7.66 | 7.69 | 12.56 | 11.34 |
| NUFIP2   | 6.88  | 6.73  | 7.91  | 9.78  | 8.04 | 7.69 | 13.25 | 11.59 |
| RELB     | 7.79  | 8.2   | 7.32  | 6.94  | 7.62 | 7.7  | 5.83  | 6.44  |
| MCUR1    | 7.58  | 7.11  | 7.69  | 7.96  | 8.19 | 7.7  | 8.39  | 7.73  |
| BUB1     | 6.17  | 4.91  | 6.55  | 6.4   | 7.49 | 7.7  | 9.08  | 8.72  |
| HBS1L    | 7.36  | 6.67  | 7.79  | 8.47  | 8.37 | 7.7  | 10.98 | 10.11 |
| BCL3     | 9.9   | 10.12 | 9.09  | 9.24  | 7.92 | 7.71 | 5.73  | 6.4   |
| TMEM5    | 6.88  | 6.94  | 7.45  | 7.69  | 8.65 | 7.71 | 9.52  | 8.56  |
| TPMT     | 6.86  | 6.43  | 7.56  | 8.37  | 9.16 | 7.71 | 10.6  | 9.78  |
| LEFTY1   | 8.02  | 8.54  | 8.27  | 7.41  | 6.76 | 7.72 | 5.14  | 8     |
| NUDCD1   | 6.61  | 7.05  | 6.93  | 8.08  | 7.92 | 7.72 | 11.35 | 9.57  |
| USP15    | 5.85  | 6     | 6.64  | 7.19  | 7.3  | 7.72 | 11.12 | 9.6   |
| CCDC28A  | 6.89  | 6.24  | 7.24  | 8.42  | 6.93 | 7.72 | 10.17 | 9.87  |
| MEF2A    | 6.95  | 6.14  | 7.94  | 9.32  | 8.06 | 7.72 | 11.86 | 10.18 |
| QSER1    | 6.41  | 6.26  | 7.66  | 9.22  | 7.98 | 7.72 | 12.5  | 11.66 |
| DHODH    | 7.36  | 7.37  | 7.07  | 6.63  | 7.93 | 7.73 | 7.39  | 7.37  |
| SLC48A1  | 7.34  | 8.29  | 7.69  | 7.51  | 8.41 | 7.73 | 7.98  | 7.44  |
| NEMP1    | 6.58  | 5.84  | 6.82  | 7.63  | 7.84 | 7.73 | 10.73 | 9.31  |
| RNF2     | 8.28  | 7.75  | 8.37  | 8.96  | 7.87 | 7.73 | 11.09 | 9.76  |
| ARID5B   | 7.98  | 7.31  | 8.3   | 9.35  | 8.14 | 7.73 | 9.72  | 9.81  |
| ZNF791   | 6.84  | 5.86  | 7.94  | 9.24  | 7.47 | 7.73 | 12.01 | 10.35 |
| FNDC3A   | 6.13  | 6.06  | 7.65  | 9.39  | 7.67 | 7.73 | 13.28 | 11.46 |
| ASRGL1   | 8.86  | 8.41  | 8.73  | 8.49  | 9.32 | 7.74 | 6.87  | 6.48  |
| FAM222B  | 8.15  | 9.28  | 8.53  | 8.34  | 7.79 | 7.74 | 8.15  | 8.42  |
| CDK14    | 6.76  | 6.27  | 7.33  | 7.76  | 7.09 | 7.74 | 10.39 | 8.46  |
| EBAG9    | 7.77  | 6.21  | 6.77  | 8.52  | 8.66 | 7.74 | 11.07 | 10.19 |
| PEX6     | 9.13  | 8.94  | 8.46  | 8.25  | 7.89 | 7.75 | 6.26  | 7.04  |
| MAP3K4   | 8.34  | 7.77  | 8.62  | 9.05  | 7.06 | 7.75 | 8.99  | 8.23  |
| TTPAL    | 6.85  | 6.59  | 7.18  | 7.53  | 7.41 | 7.75 | 8.83  | 8.56  |
| CCNYL1   | 7.53  | 6.87  | 8.02  | 8.51  | 8.56 | 7.75 | 10.68 | 10.42 |
| A1BG     | 7.5   | 8.54  | 7.57  | 6.08  | 7.66 | 7.76 | 5.78  | 6.57  |
| TMEM38B  | 7.16  | 6.51  | 7.13  | 6.13  | 7.13 | 7.76 | 9.45  | 8.18  |
| GOLT1B   | 6.67  | 6.71  | 7.28  | 8.63  | 8.27 | 7.76 | 12.44 | 10    |
| RANBP6   | 7.15  | 6.61  | 8.67  | 9.32  | 7.98 | 7.76 | 11.94 | 10.67 |
| STAR4    | 6.52  | 6.77  | 8.44  | 10.07 | 8.06 | 7.76 | 15.86 | 13.1  |
| VPS33B   | 6.8   | 7.54  | 6.82  | 6.35  | 6.79 | 7.77 | 7.23  | 7.18  |
| DHX34    | 7.36  | 7.34  | 7.11  | 7.43  | 7.7  | 7.77 | 7.05  | 7.52  |
| NOP9     | 6.19  | 6.65  | 6.38  | 6.71  | 7.28 | 7.77 | 8.88  | 8.21  |
| PGM2     | 6.98  | 5.39  | 6.63  | 7.39  | 8.08 | 7.77 | 10.27 | 8.6   |
| SMURF2   | 8.12  | 6.7   | 8.52  | 8.93  | 7.53 | 7.77 | 10.7  | 9.36  |
| MCC      | 7.13  | 6.18  | 7.67  | 8.6   | 7.95 | 7.77 | 10.25 | 9.61  |
| ANO6     | 7.6   | 7.01  | 8.35  | 8.91  | 8.01 | 7.77 | 10.51 | 10.6  |
| ZNF213   | 8.04  | 7.84  | 7.87  | 7.11  | 7.66 | 7.78 | 6.78  | 7.26  |
| FANCD2   | 7.05  | 6.72  | 7.72  | 7.95  | 7.58 | 7.78 | 10.29 | 7.5   |
| KDM2B    | 8.18  | 8.17  | 7.89  | 7.98  | 7.76 | 7.78 | 7.51  | 8.09  |
| MTFMT    | 6.49  | 6.7   | 7.2   | 7.28  | 6.94 | 7.78 | 8.19  | 8.65  |
| NUP54    | 6.65  | 7.21  | 8.03  | 8.51  | 8.07 | 7.78 | 11.67 | 9.25  |
| FAM149B1 | 7.27  | 7.65  | 7.31  | 8.22  | 8.45 | 7.78 | 10.26 | 9.52  |
| VMA21    | 6.39  | 5.83  | 7.12  | 8.83  | 8.12 | 7.78 | 12.35 | 11.37 |
| DENND6A  | 7.69  | 7.11  | 8.2   | 8.36  | 9.26 | 7.79 | 10.77 | 9.36  |
| LGALS9   | 12.17 | 11.01 | 10.21 | 9.35  | 8.42 | 7.8  | 7.48  | 7.14  |
| PARG     | 5.61  | 6.29  | 7.46  | 7.94  | 6.82 | 7.8  | 9.21  | 8.66  |
| GPALPP1  | 7.1   | 7.49  | 7.25  | 8.27  | 7.79 | 7.8  | 10.94 | 9.61  |
| TIMM8A   | 7.38  | 6.95  | 7.46  | 6.85  | 8.75 | 7.8  | 8.38  | 10.04 |
| ZNF747   | 8.21  | 8.15  | 7.95  | 8.02  | 7.69 | 7.81 | 6.48  | 7.49  |
| ZDHHC1   | 8.57  | 8.83  | 9     | 8.07  | 7.78 | 7.82 | 5.94  | 6.23  |
| ATRIP    | 6.35  | 6.26  | 7.07  | 6.03  | 7.7  | 7.82 | 7.18  | 6.57  |
| SLCO4A1  | 8.88  | 7.77  | 8.26  | 7.95  | 8.09 | 7.82 | 7.15  | 7.37  |
| HOXA2    | 7.97  | 8.42  | 8.97  | 7.73  | 7.36 | 7.82 | 9     | 8.38  |
| CCDC9    | 8.64  | 7.74  | 7.91  | 7.79  | 7.35 | 7.83 | 6.19  | 6.52  |
| PHLDB3   | 6.39  | 6.41  | 5.83  | 5.86  | 7.11 | 7.83 | 5.31  | 6.64  |
| SDE2     | 7.75  | 7.38  | 8.03  | 9.44  | 7.54 | 7.83 | 9.71  | 9.21  |
| KPNA4    | 6.66  | 6.3   | 7.76  | 8.58  | 8.42 | 7.83 | 11.11 | 10.08 |
| ABHD10   | 7.61  | 6.96  | 8.41  | 9.07  | 9.73 | 7.83 | 10.4  | 10.25 |
| BACE1    | 7.34  | 7.68  | 8.22  | 7.41  | 8    | 7.84 | 7.93  | 7.74  |
| C14orf79 | 7.35  | 6.79  | 8.05  | 7.51  | 7.79 | 7.85 | 6.77  | 7.01  |
| GAREM2   | 7.32  | 6.99  | 7.13  | 6.62  | 7.94 | 7.85 | 6.57  | 7.35  |
| WAPL     | 7.28  | 6.42  | 7.45  | 8.77  | 8.29 | 7.85 | 11.4  | 10.04 |
| FAM64A   | 6.3   | 6.72  | 7.2   | 5.74  | 7.19 | 7.86 | 6.52  | 6.2   |

|              |       |       |       |       |       |      |       |       |
|--------------|-------|-------|-------|-------|-------|------|-------|-------|
| KLHDC8B      | 8.54  | 8.49  | 7.47  | 6.83  | 8.05  | 7.86 | 5.84  | 6.8   |
| NDUFAF6      | 6.25  | 6.4   | 6.64  | 7.21  | 7.52  | 7.86 | 8.73  | 7.23  |
| DNAJC18      | 7.25  | 7.22  | 6.97  | 6.87  | 8.3   | 7.86 | 8.32  | 7.98  |
| SAAL1        | 7.58  | 7.81  | 8.04  | 8.93  | 7.94  | 7.86 | 9.3   | 8.21  |
| TCTN2        | 10.93 | 10.11 | 9.53  | 10.66 | 8.72  | 7.86 | 8.45  | 8.52  |
| TP53BP2      | 6.97  | 6.45  | 8.59  | 8.48  | 8.64  | 7.86 | 10.07 | 9.01  |
| NEK2         | 6.23  | 6.19  | 6.33  | 7.24  | 8.31  | 7.86 | 10.89 | 9.42  |
| LRRC37A      | 5.75  | 6.37  | 7.51  | 7.5   | 6.87  | 7.86 | 10.8  | 9.71  |
| CPNE8        | 7.61  | 7.82  | 8.57  | 9.74  | 7.95  | 7.86 | 12.59 | 10.95 |
| FZD2         | 9.75  | 9.95  | 9.54  | 8.4   | 7.22  | 7.87 | 6.21  | 6.95  |
| ENGASE       | 7.64  | 6.91  | 7.27  | 8.81  | 7.76  | 7.87 | 7.81  | 7.45  |
| ZNF436       | 8.2   | 8.35  | 8.9   | 8.21  | 7.58  | 7.87 | 8.62  | 8.22  |
| ZNF839       | 7.88  | 7.86  | 7.23  | 7.76  | 8     | 7.87 | 8.21  | 8.77  |
| IDE          | 6.38  | 6.53  | 7.84  | 8.53  | 8.69  | 7.87 | 12.72 | 11.03 |
| RSPRY1       | 7.18  | 6.99  | 8.38  | 9.73  | 8.34  | 7.87 | 12    | 11.08 |
| TRMT5        | 7.85  | 6.94  | 8.5   | 8.82  | 8.64  | 7.87 | 11.64 | 11.34 |
| SLC25A36     | 7.05  | 6.49  | 7.99  | 9.7   | 7.57  | 7.87 | 14.54 | 13.15 |
| C16orf95     | 7.44  | 8     | 6.43  | 5.74  | 6.23  | 7.88 | 5.19  | 4.59  |
| GPR157       | 7.4   | 7.35  | 6.36  | 6.21  | 8.09  | 7.88 | 6.18  | 6.13  |
| SLC25A14     | 5.73  | 6.04  | 5.25  | 6.24  | 7.18  | 7.88 | 8.5   | 7.49  |
| FAM73B       | 8.19  | 7.88  | 7.27  | 7.83  | 8.34  | 7.88 | 7.41  | 7.76  |
| HK2          | 11.8  | 10.89 | 11.43 | 11.94 | 8.33  | 7.88 | 9.14  | 8.43  |
| NKRF         | 7.17  | 6.49  | 7.36  | 8.51  | 8.61  | 7.88 | 9.75  | 9.28  |
| WDR60        | 7.11  | 6.7   | 8.58  | 9.79  | 7.62  | 7.88 | 10.4  | 10.07 |
| IFIT3        | 11.96 | 11.03 | 13.14 | 15.31 | 8.03  | 7.88 | 12.06 | 10.52 |
| SUCO         | 8.47  | 8.31  | 9.52  | 12.34 | 8.06  | 7.88 | 13.47 | 11.55 |
| DIS3L        | 7.09  | 7.32  | 6.76  | 7.83  | 7.88  | 7.89 | 9.03  | 8.96  |
| TXNL4B       | 6.84  | 6.23  | 6.35  | 6.66  | 7.65  | 7.9  | 8.08  | 7.43  |
| FAM84A       | 6.49  | 6.48  | 6.38  | 6.56  | 7.24  | 7.9  | 6.73  | 8.21  |
| COA5         | 6.91  | 6.48  | 7.37  | 7.1   | 8.87  | 7.9  | 10.23 | 8.59  |
| NPIPA5       | 4.95  | 6.26  | 7.38  | 6.32  | 7.26  | 7.9  | 11.89 | 8.9   |
| LOC101929959 | 6.08  | 5.6   | 7.14  | 6.87  | 7.86  | 7.9  | 8.29  | 9.12  |
| TRIT1        | 8.28  | 6.59  | 7.96  | 9.09  | 9.48  | 7.9  | 11.06 | 10.04 |
| GTF2IRD2     | 5.24  | 6.74  | 5.03  | 7.4   | 8.54  | 7.91 | 5.54  | 5.79  |
| TTC38        | 8.74  | 8.16  | 8.32  | 7.5   | 7.88  | 7.91 | 7.45  | 7.45  |
| S100BPB      | 8.46  | 7.27  | 7.69  | 7.51  | 7.64  | 7.91 | 9.94  | 8.33  |
| SPRYD4       | 7.34  | 7.79  | 7.35  | 7.87  | 8.18  | 7.91 | 8.07  | 8.6   |
| EZH1         | 7.53  | 7.74  | 7.96  | 9.02  | 8.46  | 7.91 | 10.11 | 9.66  |
| KIAA1324L    | 7.76  | 7.44  | 8.97  | 9.46  | 8.26  | 7.91 | 11.22 | 10.34 |
| FBXO27       | 8.91  | 8.72  | 8.32  | 8.7   | 7.7   | 7.92 | 7.59  | 6.71  |
| FANCF        | 7.63  | 7.05  | 7.93  | 7.55  | 7.64  | 7.92 | 7.78  | 7.94  |
| COL4A3BP     | 7.1   | 6.4   | 7.75  | 9.79  | 7.82  | 7.92 | 10.73 | 10.03 |
| PRAP1        | 5.4   | 6.57  | 5.93  | 4.9   | 7.75  | 7.93 | 6.48  | 5.88  |
| BPHL         | 8.06  | 7.88  | 8.32  | 7.65  | 8.85  | 7.93 | 7.19  | 8.36  |
| PPP2R3C      | 6.48  | 5.66  | 6.9   | 7.17  | 7.86  | 7.93 | 10.19 | 9.4   |
| IDUA         | 6.76  | 5.91  | 6.24  | 6.24  | 5.82  | 7.94 | 6.07  | 7.12  |
| GSPT2        | 7.73  | 8.64  | 8.53  | 8.33  | 7.49  | 7.94 | 8.78  | 8.69  |
| ZCCHC11      | 6.45  | 6.65  | 8.21  | 9.65  | 7.88  | 7.94 | 13.95 | 11.81 |
| HSD11B1L     | 7.96  | 8.2   | 7.03  | 8.12  | 7.45  | 7.95 | 6.93  | 6.78  |
| ASB1         | 6.73  | 6.49  | 7     | 6.9   | 7.97  | 7.95 | 8.23  | 7.4   |
| NDUFAF5      | 6.98  | 7.04  | 7.97  | 8.87  | 10.34 | 7.95 | 9.41  | 8.7   |
| ISOC1        | 7.89  | 6.77  | 7.85  | 8.67  | 9.24  | 7.95 | 9.52  | 8.94  |
| TANC1        | 8.09  | 7.95  | 8.46  | 8.67  | 8.15  | 7.95 | 9.45  | 9.17  |
| SPATA24      | 9.3   | 8.22  | 7.25  | 7.77  | 7.42  | 7.95 | 6.89  | 9.28  |
| TSTD2        | 8.12  | 7.14  | 7.98  | 8.98  | 8.58  | 7.95 | 10.71 | 9.43  |
| CTDSP2       | 8.41  | 8.03  | 9.55  | 10.17 | 9.18  | 7.95 | 12.4  | 11.7  |
| B3GNT2       | 8.47  | 7.78  | 8.24  | 9.33  | 8.85  | 7.96 | 10.29 | 9.35  |
| RFK          | 6.79  | 5.29  | 6.85  | 7.73  | 8.69  | 7.96 | 12.23 | 9.58  |
| BTBD19       | 5.46  | 5.5   | 5.96  | 7.6   | 6.74  | 7.97 | 10.05 | 8.78  |
| ATAD2        | 8.56  | 7.02  | 9.64  | 11.29 | 8.82  | 7.97 | 14.06 | 10.78 |
| ISY1-RAB43   | 8.27  | 7.72  | 7.94  | 7.22  | 9.57  | 7.98 | 8.24  | 8.15  |
| RECK         | 7.73  | 8.02  | 7.83  | 8.05  | 7.9   | 7.98 | 9.24  | 9.76  |
| MED28        | 8.09  | 8.14  | 8.67  | 7.99  | 9.17  | 7.98 | 9.45  | 9.78  |
| TAF2         | 6.4   | 5.72  | 7.24  | 8.59  | 8.36  | 7.98 | 12.13 | 10.33 |
| SERGEF       | 8.05  | 9.31  | 8.25  | 8.3   | 7.94  | 7.99 | 6.99  | 7.85  |
| FUT8         | 6.03  | 5.6   | 7.57  | 7.57  | 8.53  | 7.99 | 10.08 | 9.68  |
| PGRMC2       | 8.1   | 7.73  | 8.39  | 9.56  | 9.13  | 7.99 | 10.27 | 9.76  |
| SGCB         | 8.61  | 7.52  | 9.19  | 10.66 | 9.51  | 7.99 | 13.36 | 10.72 |
| CBX8         | 10.84 | 10.35 | 9.12  | 8.64  | 7.89  | 8    | 5.97  | 6.99  |
| PARP14       | 10.48 | 9.38  | 12.08 | 15.29 | 7.59  | 8    | 13.78 | 11.03 |
| TTI2         | 8.44  | 9.11  | 8.14  | 7.6   | 8.65  | 8.01 | 7.57  | 7.23  |
| YARS2        | 7.77  | 6.69  | 7.64  | 7.37  | 9.09  | 8.01 | 9.46  | 8.45  |
| KMT2A        | 8.01  | 7.8   | 8.5   | 8.95  | 8.07  | 8.01 | 10.21 | 9.9   |
| NLRX1        | 8.42  | 8.53  | 8.54  | 7.31  | 7.32  | 8.02 | 6.9   | 7.53  |
| MED20        | 8.45  | 8.71  | 8.68  | 7.86  | 7.22  | 8.02 | 8.28  | 8.19  |
| APOBEC3F     | 9.09  | 10.71 | 9.36  | 10.08 | 8.7   | 8.02 | 9.47  | 8.61  |
| FAN1         | 7.75  | 7.69  | 8.91  | 9.43  | 8.71  | 8.02 | 11.06 | 10.34 |
| TCF7L1       | 8.36  | 10.08 | 8.8   | 8.73  | 9.12  | 8.03 | 6.79  | 8.41  |
| SLC6A6       | 7.53  | 7.4   | 7.8   | 7.41  | 8.15  | 8.03 | 8.58  | 9.3   |
| ZSWIM7       | 6.08  | 6.02  | 6.23  | 6.44  | 7.43  | 8.04 | 8.21  | 7.12  |
| RAP2B        | 6.93  | 6.37  | 7.5   | 7.07  | 7.89  | 8.04 | 8.28  | 7.83  |
| CHRAC1       | 7.87  | 7.68  | 8.06  | 8.29  | 9.03  | 8.04 | 10.22 | 9.17  |
| ZNF106       | 7.68  | 6.77  | 7.73  | 8.43  | 8.61  | 8.04 | 10.15 | 9.21  |

|              |       |       |       |       |       |      |       |       |
|--------------|-------|-------|-------|-------|-------|------|-------|-------|
| ZDHHC2       | 7.69  | 7.71  | 8.24  | 8.31  | 7.92  | 8.04 | 9.76  | 10.35 |
| AIFM2        | 7.9   | 7.79  | 7.58  | 7.5   | 7.58  | 8.05 | 7.54  | 7.14  |
| EHF          | 6.27  | 6.39  | 7.06  | 8.14  | 8.68  | 8.05 | 11.98 | 10.36 |
| ORC2         | 7.64  | 7.15  | 8.86  | 9.6   | 9.34  | 8.05 | 11.22 | 10.51 |
| CHURC1       | 6.82  | 5.76  | 8.35  | 10.51 | 8.54  | 8.05 | 14.91 | 11.84 |
| LRP4         | 8.08  | 8.25  | 7.92  | 8.96  | 7.94  | 8.06 | 7.85  | 8.34  |
| ABHD2        | 8.45  | 7.92  | 8.74  | 8.81  | 8.53  | 8.06 | 9.83  | 8.96  |
| SIAH1        | 8.46  | 8.52  | 8.53  | 9.91  | 8.45  | 8.06 | 10.78 | 10.03 |
| DCAF16       | 7.53  | 6.5   | 8.37  | 9.32  | 9.5   | 8.06 | 12.09 | 11.84 |
| NTNG1        | 7.51  | 7.64  | 7.8   | 8.32  | 8.02  | 8.07 | 9.31  | 9.74  |
| TRIM22       | 11.25 | 10.21 | 11.36 | 13.27 | 8.53  | 8.07 | 11.33 | 9.85  |
| NDUFA5       | 8.11  | 8.61  | 7.65  | 8.55  | 9.06  | 8.07 | 12.02 | 10.92 |
| NSUN4        | 7.15  | 7.33  | 7.33  | 7.09  | 6.99  | 8.08 | 7.37  | 7.24  |
| FAM63A       | 8.2   | 9.71  | 9.41  | 7.98  | 7.97  | 8.08 | 7.22  | 7.46  |
| PHF20L1      | 6.85  | 7.12  | 8.47  | 10.18 | 7.99  | 8.08 | 14.74 | 11.42 |
| NDST2        | 7.47  | 7.69  | 7.88  | 8.61  | 7.66  | 8.09 | 7.11  | 7.6   |
| TMEM70       | 7.07  | 5.9   | 8.32  | 7.11  | 8.42  | 8.09 | 9.35  | 8.24  |
| CAMTA2       | 8.03  | 7.99  | 7.8   | 7.7   | 7.87  | 8.09 | 7.19  | 8.33  |
| RIPK2        | 6.14  | 6.33  | 6.9   | 7.06  | 8.32  | 8.09 | 10.63 | 9.63  |
| SLC25A46     | 7.66  | 7.4   | 8.62  | 8.91  | 8.14  | 8.09 | 12.25 | 10.88 |
| ZNF24        | 9.36  | 7.57  | 10.65 | 12.47 | 9.99  | 8.09 | 14.77 | 11.24 |
| TMEM106B     | 7.73  | 7.62  | 8.09  | 9.66  | 8.6   | 8.1  | 13.92 | 12.02 |
| NBL1         | 5.88  | 4.53  | 9.29  | 6.09  | 6.59  | 8.11 | 2.1   | 4.24  |
| CTSF         | 7.31  | 8.99  | 8.95  | 7.52  | 7.67  | 8.11 | 5.85  | 6.93  |
| MALT1        | 6.83  | 6.6   | 8.54  | 7.69  | 6.32  | 8.11 | 10.15 | 7.65  |
| ZBTB12       | 8.09  | 8.45  | 8.99  | 7.66  | 7.35  | 8.12 | 6.93  | 7.42  |
| EGLN3        | 12.69 | 11.88 | 12.67 | 11.72 | 7.72  | 8.12 | 9.58  | 7.43  |
| LOC107987372 | 7.75  | 6.84  | 7.95  | 6.98  | 5.64  | 8.12 | 6.87  | 7.5   |
| RMND1        | 7.3   | 7.1   | 6.5   | 6.71  | 8.18  | 8.12 | 12.01 | 9.6   |
| PPWD1        | 7.2   | 6.82  | 7.72  | 8.85  | 6.84  | 8.12 | 13.1  | 10.25 |
| LTV1         | 7.56  | 6.69  | 8.83  | 9.02  | 9.11  | 8.12 | 12.44 | 12.95 |
| DDX51        | 7.54  | 7.35  | 8.53  | 7.68  | 10.31 | 8.13 | 7.14  | 8.06  |
| C16orf70     | 7.05  | 7.8   | 8     | 8.77  | 7.63  | 8.13 | 8.28  | 8.92  |
| BTA1         | 6.9   | 5.88  | 7.31  | 8.75  | 6.71  | 8.13 | 13.99 | 11.33 |
| ATP6V1C1     | 6.92  | 6.36  | 7.39  | 8.97  | 8.43  | 8.13 | 13.86 | 11.48 |
| DOT1L        | 7.9   | 7.91  | 8.16  | 7.99  | 7.88  | 8.14 | 7.22  | 7.99  |
| ZDHHC13      | 7.84  | 7.68  | 7.82  | 8.55  | 8.8   | 8.14 | 11.46 | 9.64  |
| SUOX         | 8.84  | 9.5   | 8.28  | 7.82  | 8.32  | 8.15 | 7.38  | 8.41  |
| PHTF2        | 6.77  | 5.6   | 8.1   | 9.33  | 8.63  | 8.16 | 13.68 | 10.97 |
| IRS2         | 7.95  | 7.49  | 7.62  | 8.05  | 7.41  | 8.17 | 6.59  | 6.89  |
| C19orf47     | 7.77  | 7.7   | 7.72  | 6.91  | 8.34  | 8.17 | 7.23  | 7.34  |
| ADSSL1       | 10.77 | 11.08 | 9.85  | 10.06 | 7.11  | 8.17 | 6.04  | 7.53  |
| TAPBPL       | 9.92  | 9.22  | 9.42  | 9.11  | 7.99  | 8.17 | 7.02  | 7.76  |
| NR1H3        | 7.13  | 7.8   | 7.34  | 6.91  | 9.15  | 8.17 | 8.09  | 8.91  |
| SPPL2A       | 6.62  | 6.88  | 7.18  | 8.12  | 8.38  | 8.17 | 11.36 | 10.26 |
| ITGA4        | 8.93  | 8.41  | 10.13 | 12.81 | 7.84  | 8.17 | 12.52 | 11.28 |
| MNX1         | 8.35  | 8.31  | 8.05  | 8.2   | 7.07  | 8.18 | 5.36  | 6.06  |
| FOXQ1        | 6.26  | 5.92  | 6.06  | 5.92  | 6.59  | 8.18 | 6.86  | 6.3   |
| ASNSD1       | 5.63  | 5.66  | 6.87  | 7.49  | 7.82  | 8.18 | 11.54 | 9.42  |
| TMEM245      | 7.61  | 7.31  | 8.42  | 8.92  | 8.35  | 8.18 | 11.16 | 9.7   |
| SH3BP2       | 8.91  | 8.86  | 9.65  | 10.3  | 8.03  | 8.18 | 9.45  | 9.86  |
| CLUAP1       | 7.8   | 7.76  | 8.95  | 8.7   | 8.38  | 8.18 | 10.18 | 10.21 |
| GNPTAB       | 7.43  | 7.2   | 8.02  | 9.52  | 8.98  | 8.18 | 12.16 | 10.92 |
| LRRC40       | 7.33  | 8.12  | 8     | 9.04  | 8.73  | 8.18 | 13.42 | 11.81 |
| CHURC1-FNTB  | 7.16  | 8.19  | 7.86  | 6.72  | 5.29  | 8.19 | 5.49  | 6.17  |
| ANKRD16      | 8.08  | 6.45  | 7.92  | 7.36  | 7.08  | 8.19 | 6.04  | 6.31  |
| FGD1         | 9.3   | 9.52  | 8.55  | 8.69  | 7.74  | 8.19 | 6.89  | 7.59  |
| N4BP1        | 8.57  | 8.4   | 8.25  | 8.67  | 7.39  | 8.19 | 8.85  | 8.45  |
| AREL1        | 7.33  | 7.25  | 7.5   | 7.53  | 8.41  | 8.19 | 9.23  | 8.9   |
| MAN1A1       | 7.8   | 7.84  | 8.68  | 10.26 | 8.01  | 8.19 | 9.36  | 8.94  |
| TMEM50B      | 8.76  | 8.13  | 9.1   | 9.56  | 9.17  | 8.19 | 11.27 | 9.92  |
| MLXIP        | 6.94  | 7.68  | 7.3   | 7.66  | 7.69  | 8.2  | 7.83  | 8.27  |
| CREBL2       | 7.58  | 7.14  | 7.56  | 8.35  | 7.72  | 8.2  | 9.9   | 9.08  |
| TMEM135      | 6.31  | 7.18  | 7.61  | 8.59  | 8.39  | 8.2  | 11.5  | 10.25 |
| PGAP3        | 10.06 | 9.65  | 9.02  | 9.27  | 8.01  | 8.21 | 7.03  | 6.97  |
| CLDN15       | 6.84  | 6.29  | 6.18  | 8.01  | 7.79  | 8.21 | 9.03  | 7.83  |
| AEBP2        | 7.41  | 7.19  | 7.78  | 9.21  | 8.29  | 8.21 | 12.56 | 10.29 |
| YJEFN3       | 5.87  | 5.69  | 5.4   | 7.45  | 7.66  | 8.21 | 14.8  | 10.76 |
| B4GALNT1     | 7.34  | 8.64  | 7.96  | 7.98  | 7.46  | 8.22 | 5.95  | 6.75  |
| PDK3         | 8.41  | 7.34  | 8.35  | 8.08  | 7.85  | 8.22 | 7.69  | 7.89  |
| TMX4         | 8.07  | 8.04  | 9.08  | 9.26  | 8.77  | 8.22 | 9.97  | 9.36  |
| DMTF1        | 8.23  | 7.39  | 9.26  | 11.04 | 8.78  | 8.22 | 16.95 | 13.93 |
| USP31        | 7.41  | 7.02  | 8.11  | 8.22  | 7.63  | 8.23 | 8.22  | 7.22  |
| ZNF574       | 9.15  | 9.06  | 8.72  | 8.68  | 7.75  | 8.23 | 6.6   | 7.29  |
| CAAP1        | 8.22  | 7.97  | 8.58  | 9.33  | 8.3   | 8.23 | 10.48 | 9.58  |
| ZNF608       | 8.59  | 8.16  | 9.51  | 11.28 | 8.95  | 8.23 | 11.47 | 10.75 |
| IMPACT       | 7.14  | 6.47  | 8.09  | 9.35  | 9.68  | 8.23 | 13.35 | 11.4  |
| YEATS4       | 7.28  | 6.53  | 6.89  | 7.38  | 8.31  | 8.24 | 10.26 | 8.79  |
| SEC24D       | 9.34  | 8.68  | 10.22 | 9.5   | 8.25  | 8.24 | 9.84  | 9.33  |
| SHCBP1       | 7.8   | 7.12  | 8.44  | 8.32  | 9.42  | 8.24 | 9.93  | 9.86  |
| GIT2         | 9.19  | 8.03  | 8.56  | 9.05  | 9.55  | 8.24 | 10.13 | 9.91  |
| CIR1         | 7.48  | 7.82  | 8.5   | 10.12 | 9.71  | 8.24 | 13.19 | 11.78 |
| BIRC6        | 7.42  | 6.61  | 9.21  | 10.56 | 8.55  | 8.24 | 13.42 | 12.07 |
| SERTAD1      | 9.15  | 8.42  | 7.93  | 7.69  | 8.81  | 8.25 | 7.78  | 7     |

|                |       |       |       |       |       |      |       |       |
|----------------|-------|-------|-------|-------|-------|------|-------|-------|
| ACOX3          | 7.76  | 7.55  | 7.51  | 6.93  | 8.21  | 8.25 | 7.21  | 8.14  |
| GPC4           | 10.58 | 10.15 | 9.66  | 9.48  | 7.98  | 8.25 | 8.28  | 9.51  |
| ZNF462         | 8.15  | 7.31  | 8.84  | 10.12 | 7.37  | 8.25 | 9.73  | 9.7   |
| PLD1           | 8.13  | 6.69  | 8.48  | 8.54  | 7.89  | 8.25 | 10.61 | 9.7   |
| PPM1B          | 7.33  | 7.82  | 9.51  | 11.14 | 8.71  | 8.25 | 11.68 | 10.09 |
| B3GALNT1       | 7.64  | 7.3   | 8.72  | 10.16 | 9.18  | 8.25 | 12.5  | 10.48 |
| BOLA1          | 9.75  | 9.07  | 8.87  | 8.49  | 8.93  | 8.26 | 7.39  | 6.95  |
| LARS2          | 8.2   | 8.36  | 8.25  | 7.71  | 7.51  | 8.26 | 8.02  | 8.42  |
| ADIRF          | 10.94 | 10.02 | 10.55 | 10.88 | 9.64  | 8.27 | 7.03  | 7.21  |
| MPHOSPH6       | 7.96  | 8.38  | 8.51  | 8.09  | 7.78  | 8.27 | 11.05 | 8.12  |
| NLRP1          | 7.38  | 6.88  | 7.25  | 7.66  | 9.03  | 8.27 | 9.43  | 9.19  |
| EXOC6B         | 7.44  | 7.96  | 8.42  | 8.51  | 9.32  | 8.27 | 11.05 | 10.01 |
| ZNF322         | 9.76  | 8.51  | 10.49 | 11.85 | 7.54  | 8.27 | 12.42 | 11.64 |
| ZNF740         | 7.23  | 8.72  | 8.21  | 8.41  | 8.17  | 8.28 | 8.33  | 8.3   |
| SMU1           | 8     | 7.88  | 8.23  | 8.53  | 7.9   | 8.28 | 9.68  | 9.05  |
| TMEM87B        | 7.13  | 6.62  | 7.78  | 9.21  | 8.34  | 8.28 | 11.14 | 9.94  |
| CCDC88A        | 7.51  | 7.29  | 7.7   | 9.69  | 7.71  | 8.28 | 14.2  | 12.64 |
| FAM120B        | 8.97  | 8.06  | 10.34 | 9.85  | 7.98  | 8.29 | 9.38  | 9.49  |
| TBPL1          | 8.67  | 9.37  | 9.06  | 9.66  | 9.74  | 8.29 | 12.31 | 9.72  |
| ZNF281         | 8.63  | 7.48  | 9.53  | 11.15 | 8.98  | 8.29 | 11.96 | 11.24 |
| TBX1           | 9.59  | 8.45  | 9.61  | 8.99  | 7.68  | 8.3  | 6.98  | 7.07  |
| ZBTB9          | 8.51  | 8.57  | 8.74  | 7.83  | 8.21  | 8.3  | 7.45  | 7.81  |
| AGFG1          | 8.03  | 8.19  | 8.22  | 9.33  | 8.84  | 8.3  | 11.04 | 9.79  |
| MUT            | 7.62  | 6.65  | 8.65  | 9.66  | 9.85  | 8.3  | 13.09 | 10.17 |
| PHIP           | 6.68  | 7.01  | 7.96  | 9.72  | 7.66  | 8.3  | 12.75 | 11.42 |
| ZC3H12A        | 7.41  | 7.46  | 7.29  | 7.75  | 9.04  | 8.31 | 7.75  | 7.04  |
| SNAPC4         | 6.81  | 6.79  | 6.19  | 6.68  | 7.2   | 8.31 | 7.42  | 7.36  |
| ACTR5          | 8.2   | 8.55  | 8.49  | 8.73  | 8.89  | 8.31 | 9.06  | 8.64  |
| MTMR11         | 8.01  | 8.18  | 8.78  | 9.05  | 7.71  | 8.31 | 8.99  | 8.73  |
| TOP3B          | 7.95  | 7.1   | 8.13  | 7.55  | 7.57  | 8.32 | 8.13  | 7.02  |
| TMEM79         | 7.75  | 7.29  | 8.17  | 8.28  | 8.31  | 8.32 | 8.17  | 8.23  |
| PDZD8          | 6.68  | 6.52  | 7.34  | 8.19  | 7.73  | 8.32 | 9.91  | 8.62  |
| COQ6           | 8.06  | 8.42  | 7.82  | 8.2   | 9.29  | 8.32 | 8.8   | 8.66  |
| TMEM185A       | 8.82  | 9.35  | 9.29  | 9.95  | 9.25  | 8.32 | 9     | 9.64  |
| BAG5           | 7.36  | 6.83  | 7.84  | 8.58  | 8.39  | 8.32 | 10.06 | 9.68  |
| RFX1           | 8.67  | 8.58  | 7.91  | 7.42  | 7.49  | 8.33 | 5.5   | 6.31  |
| MPC1           | 8.41  | 6.64  | 7.55  | 7.16  | 7.95  | 8.33 | 9.4   | 7.41  |
| ABCB9          | 7.91  | 7.64  | 8.16  | 7.59  | 8.28  | 8.33 | 6.54  | 7.57  |
| FXN            | 7.53  | 7.53  | 8.21  | 6.53  | 8.42  | 8.33 | 7.12  | 7.6   |
| C1orf50        | 6.88  | 7.75  | 9.44  | 7.48  | 8.86  | 8.33 | 9.2   | 8.7   |
| SORL1          | 7.46  | 6.99  | 8.15  | 8.78  | 8.66  | 8.33 | 9.58  | 9.83  |
| TSPYL4         | 7.83  | 8.16  | 8.59  | 9.01  | 8.44  | 8.34 | 9.79  | 9.09  |
| RND3           | 6.68  | 6.64  | 7.11  | 8.98  | 9.08  | 8.34 | 13.49 | 10.36 |
| NDFIP2         | 7.62  | 7.73  | 8.22  | 9.12  | 9.12  | 8.34 | 11.93 | 10.38 |
| MED11          | 7.46  | 7.51  | 6.09  | 7.66  | 7.37  | 8.35 | 7.18  | 7.74  |
| NCALD          | 8.61  | 8.08  | 8.51  | 7.86  | 7.92  | 8.35 | 8.01  | 8.1   |
| TMEM41A        | 8.18  | 8.92  | 9.47  | 7.73  | 9     | 8.35 | 8.84  | 8.75  |
| MYCBP          | 7.47  | 7.05  | 8.01  | 8.73  | 8.53  | 8.35 | 11.37 | 9.15  |
| PIK3R4         | 7.92  | 7.41  | 8.57  | 8.68  | 8.75  | 8.35 | 11.52 | 10.77 |
| BLOC1S6        | 6.64  | 5.35  | 7.81  | 8.96  | 8     | 8.35 | 14.7  | 12.04 |
| TAB3           | 6.22  | 6.31  | 7.93  | 9.57  | 8.21  | 8.35 | 13.55 | 12.31 |
| KTI12          | 8.63  | 8.82  | 7.38  | 7.39  | 8.47  | 8.36 | 7.38  | 7.06  |
| TECPR1         | 7.76  | 7.65  | 7.41  | 7.36  | 7.81  | 8.36 | 7.26  | 7.36  |
| PDE4A          | 7.13  | 7.24  | 6.96  | 7.24  | 7.8   | 8.36 | 7.05  | 7.86  |
| LIN37          | 7.95  | 8.93  | 8.04  | 7.4   | 9.89  | 8.36 | 7.17  | 8.27  |
| HYAL1          | 7.3   | 7.33  | 8.02  | 7.46  | 9.21  | 8.36 | 7.75  | 8.68  |
| N4BP2L2        | 7.83  | 7.43  | 8.97  | 10.65 | 8.96  | 8.36 | 16.37 | 12.33 |
| TNFRSF14       | 6.66  | 7.47  | 6.61  | 7.34  | 7.9   | 8.37 | 8.33  | 7.48  |
| TSNARE1        | 8.05  | 8.28  | 7.55  | 6.8   | 8.25  | 8.37 | 8.25  | 8.6   |
| CRNDE          | 7.49  | 7.43  | 8.28  | 8.83  | 7.81  | 8.37 | 8.08  | 9.42  |
| DDX20          | 8.2   | 6.7   | 8.07  | 8.41  | 8.55  | 8.37 | 10.94 | 9.61  |
| SPG20          | 8.17  | 7.44  | 8.94  | 9.64  | 8.41  | 8.37 | 12.9  | 11.39 |
| RABL2A         | 7.42  | 7.33  | 6.6   | 7.79  | 7.11  | 8.38 | 7.45  | 7.62  |
| AKAP10         | 7.23  | 6.4   | 8.66  | 9.42  | 8.27  | 8.38 | 11.58 | 9.29  |
| TMTC2          | 9.13  | 9.31  | 10.04 | 10.74 | 8.74  | 8.38 | 10.69 | 9.47  |
| SKP2           | 9.17  | 8.12  | 9.07  | 9.58  | 9.21  | 8.38 | 12.02 | 10.06 |
| KIAA1143       | 7.08  | 7.45  | 7.88  | 8.79  | 9.72  | 8.38 | 11.87 | 11.02 |
| RSRC1          | 6.49  | 7.13  | 8.15  | 8.95  | 9.07  | 8.38 | 12.69 | 12.99 |
| PLA2G6         | 7.8   | 7.34  | 7.56  | 7.25  | 7.48  | 8.39 | 8.12  | 7.63  |
| PCDHGB1        | 7.47  | 8.21  | 7.82  | 7.98  | 6.79  | 8.39 | 7.36  | 8.53  |
| RTN2           | 6.44  | 6.24  | 5.93  | 5.89  | 7.72  | 8.4  | 5.99  | 6.85  |
| SPCS3          | 7.28  | 7.22  | 9.08  | 10.62 | 8.89  | 8.4  | 12.77 | 11.09 |
| TAOK1          | 7.24  | 6.43  | 8.83  | 10.81 | 8.59  | 8.4  | 14.72 | 13.04 |
| TMEM164        | 8.97  | 9.58  | 9.22  | 9.01  | 9.52  | 8.41 | 9.49  | 9.25  |
| NEMF           | 7.31  | 7.17  | 8.38  | 9.35  | 7.86  | 8.41 | 13.25 | 11.94 |
| RPL17-C18orf32 | 7.05  | 7.7   | 9.85  | 8.41  | 10.73 | 8.41 | 13.19 | 14.44 |
| CLDN4          | 6.96  | 8.05  | 6.76  | 8.04  | 7.57  | 8.42 | 7.14  | 7.01  |
| TTC5           | 9.09  | 8.79  | 8.92  | 8.63  | 8.03  | 8.42 | 7.55  | 7.45  |
| DHX57          | 8.89  | 8.32  | 9.23  | 9.4   | 9.59  | 8.42 | 12.3  | 9.97  |
| ARFGEF1        | 7.13  | 6.44  | 8.35  | 9.84  | 8.74  | 8.42 | 14.97 | 12.81 |
| NIPA2          | 7.32  | 7.05  | 6.92  | 8.29  | 8.48  | 8.43 | 9.99  | 9.85  |
| ZNF7           | 7.62  | 7.73  | 8.68  | 9.28  | 8.55  | 8.43 | 10.64 | 9.87  |
| FAM229A        | 6.86  | 6.23  | 4.89  | 6.29  | 6.84  | 8.44 | 6.95  | 7.21  |
| PRIM2          | 8.4   | 7.75  | 8.4   | 7.8   | 8.07  | 8.44 | 9.52  | 8.57  |

|              |       |       |       |       |       |      |       |       |
|--------------|-------|-------|-------|-------|-------|------|-------|-------|
| AGO2         | 7.5   | 8.16  | 7.82  | 8.51  | 8.25  | 8.44 | 9.59  | 9.43  |
| NGLY1        | 7.97  | 6.97  | 7.9   | 8.11  | 8.41  | 8.45 | 9.63  | 10.77 |
| SLK          | 7.54  | 6.88  | 7.94  | 10.15 | 8.47  | 8.45 | 13.5  | 12.5  |
| HIST1H4C     | 4.21  | 3.95  | 3.81  | 4.45  | 7.61  | 8.46 | 7.54  | 7.43  |
| SLC38A7      | 7.05  | 7.38  | 6.89  | 6.96  | 8.3   | 8.46 | 7.52  | 7.93  |
| MTMR1        | 8.24  | 7.89  | 7.76  | 8.63  | 8.03  | 8.46 | 8.63  | 8.09  |
| PEAR1        | 7.2   | 7.55  | 7.44  | 7.46  | 8.29  | 8.46 | 8.74  | 8.67  |
| BPGM         | 7.06  | 7.32  | 7.24  | 7.25  | 9.27  | 8.46 | 11.64 | 9.55  |
| CDR2L        | 7.79  | 8.69  | 7.74  | 7.65  | 7     | 8.47 | 6.29  | 7.29  |
| NUDT19       | 8.46  | 6.56  | 6.82  | 7.3   | 8.3   | 8.47 | 7.77  | 8.01  |
| DHX33        | 6.28  | 6.63  | 6.98  | 7.17  | 8.87  | 8.47 | 9.82  | 8.3   |
| CDK18        | 10.29 | 9.79  | 10.23 | 10.06 | 7.77  | 8.49 | 8.2   | 8.38  |
| FAM212B      | 7.37  | 7.54  | 6.89  | 6.83  | 9.11  | 8.49 | 8.86  | 8.85  |
| ZMAT3        | 4.91  | 4.76  | 5.6   | 7.02  | 8.61  | 8.49 | 12.86 | 11.56 |
| DPY19L4      | 8.58  | 8.31  | 9.3   | 11.08 | 9     | 8.49 | 14.25 | 12.91 |
| LYAR         | 8.66  | 8.62  | 9.53  | 10.07 | 11.67 | 8.49 | 14.78 | 13.21 |
| FAM86C1      | 7.91  | 8.61  | 8.5   | 7.5   | 8.45  | 8.5  | 7.56  | 8.24  |
| ZBED4        | 8.59  | 8.16  | 8.86  | 8.75  | 8.85  | 8.5  | 9.34  | 8.82  |
| FOXO3        | 9.34  | 8.31  | 9.61  | 10.17 | 7.91  | 8.5  | 9.32  | 9.68  |
| C2orf74      | 6.69  | 7.77  | 7.1   | 8.79  | 7.02  | 8.5  | 11.93 | 9.74  |
| ANKRD17      | 8.44  | 7.45  | 9.56  | 9.79  | 9.02  | 8.5  | 11.17 | 10.5  |
| FMNL2        | 7.66  | 7.26  | 8.34  | 9.48  | 8.44  | 8.5  | 12.43 | 11.15 |
| ARMCX3       | 8.34  | 8.31  | 9.97  | 11.48 | 9.74  | 8.51 | 12.83 | 11.74 |
| MAP3K6       | 9.35  | 10.01 | 9.91  | 8.72  | 7.43  | 8.52 | 6.43  | 7.32  |
| MKL1         | 9.87  | 9.25  | 9.06  | 8.57  | 9.03  | 8.52 | 7.49  | 8.3   |
| AZI2         | 8.59  | 9.29  | 11.01 | 10.2  | 8.98  | 8.52 | 12.71 | 11.77 |
| NFATC3       | 8.67  | 8.22  | 9.08  | 9.38  | 8.38  | 8.53 | 10.3  | 9.24  |
| ZNF639       | 7.91  | 7.43  | 8.99  | 9.15  | 9.35  | 8.53 | 13.48 | 12.05 |
| LOC102724751 | 7.17  | 8.1   | 7.58  | 8.36  | 8.09  | 8.54 | 6.04  | 6.45  |
| MOAP1        | 7.52  | 7.28  | 7.86  | 8.57  | 8.47  | 8.54 | 9.65  | 8.76  |
| SH3RF2       | 8.42  | 8.47  | 8.53  | 9.17  | 9.35  | 8.54 | 10.02 | 8.94  |
| TRAPPC10     | 8.22  | 7.44  | 8.79  | 9.24  | 9.16  | 8.54 | 10.22 | 9.94  |
| ZSWIM4       | 8.4   | 9.14  | 7.98  | 7.49  | 8.2   | 8.55 | 7.08  | 7.8   |
| UBR7         | 9.81  | 9.68  | 9.8   | 10.37 | 9.96  | 8.55 | 11.44 | 9.12  |
| BPTF         | 7.64  | 6.97  | 9.22  | 11.34 | 8.25  | 8.55 | 13.64 | 12.5  |
| WDR24        | 9.03  | 9.59  | 8.52  | 8.54  | 7.57  | 8.56 | 6.69  | 7.21  |
| GINS4        | 8.23  | 7.47  | 7.88  | 7.68  | 9.53  | 8.56 | 9.34  | 8.25  |
| TMEM38A      | 8.54  | 8.66  | 8.45  | 7.93  | 8.17  | 8.56 | 7.95  | 8.67  |
| ZNF251       | 7.87  | 7.13  | 7.76  | 8.66  | 8.12  | 8.56 | 10.99 | 9.07  |
| CLIC3        | 12.32 | 14.5  | 11.53 | 10.51 | 6.17  | 8.58 | 4.21  | 6.18  |
| ASB6         | 8.52  | 8.81  | 8.28  | 7.61  | 8.96  | 8.58 | 6.87  | 7.57  |
| PHF8         | 8.92  | 8.85  | 9.31  | 9.16  | 8.62  | 8.58 | 8.19  | 8.35  |
| GTF2H2       | 6.57  | 6.46  | 5.85  | 8.13  | 6.44  | 8.58 | 12.41 | 8.48  |
| PFKFB4       | 14.64 | 12.22 | 13.72 | 12.15 | 9.16  | 8.58 | 11.35 | 9.11  |
| RNF128       | 9.27  | 8.74  | 8.89  | 10.9  | 8.2   | 8.58 | 10.47 | 9.57  |
| THAP12       | 8.69  | 7.87  | 9.07  | 9.9   | 8.51  | 8.58 | 10.84 | 10.38 |
| B3GALNT2     | 6.9   | 6.37  | 7.54  | 9.36  | 8.17  | 8.58 | 11.31 | 10.44 |
| ROCK1        | 7.37  | 7.27  | 7.58  | 9.66  | 7.95  | 8.58 | 13.53 | 11.79 |
| C11orf80     | 8.06  | 8.68  | 8.12  | 7.81  | 7.9   | 8.59 | 9.51  | 7.39  |
| TIMELESS     | 10.01 | 9.34  | 9.66  | 8.64  | 9.32  | 8.59 | 9.39  | 8.52  |
| CCDC88C      | 9.17  | 9.05  | 8.77  | 9.01  | 9.13  | 8.59 | 8.1   | 8.82  |
| ERBIN        | 7.9   | 7.9   | 8.81  | 10.55 | 7.75  | 8.59 | 14.2  | 12.88 |
| RAD9A        | 9.92  | 8.69  | 8.75  | 9.5   | 9.02  | 8.6  | 7.57  | 8.85  |
| MESDC2       | 10.11 | 9.57  | 9.88  | 10.2  | 9.53  | 8.6  | 9.61  | 10.06 |
| ALAD         | 9.74  | 9.2   | 9.27  | 9.5   | 9.29  | 8.6  | 9.66  | 10.11 |
| LPAR2        | 8.82  | 8.1   | 7.9   | 9.08  | 9.6   | 8.6  | 9.14  | 10.4  |
| RNMT         | 7.66  | 6.68  | 8.67  | 10.84 | 9.2   | 8.6  | 12.22 | 12.15 |
| SHTN1        | 7.81  | 7.47  | 9.46  | 11.06 | 8.8   | 8.6  | 13.93 | 12.77 |
| ZNF526       | 9.74  | 9.92  | 9.45  | 9.53  | 8.49  | 8.61 | 7.46  | 7.66  |
| RRP15        | 7.1   | 7.31  | 8.14  | 8.64  | 8.74  | 8.61 | 10.62 | 11.05 |
| PDP1         | 7.28  | 7.27  | 7.98  | 9.01  | 9.38  | 8.61 | 12.27 | 11.35 |
| TMEM154      | 4.32  | 4.74  | 5.73  | 5.97  | 9.65  | 8.61 | 13.81 | 11.45 |
| BNIP1        | 7.87  | 8.22  | 7.83  | 7.34  | 7.94  | 8.62 | 8.74  | 7.72  |
| GMPR         | 12.25 | 12.53 | 11.52 | 10.91 | 9.06  | 8.62 | 7.38  | 8.68  |
| ZBTB22       | 7.95  | 9.68  | 8.39  | 8.65  | 8.58  | 8.62 | 7.13  | 8.79  |
| ARL3         | 8.73  | 8.59  | 9.23  | 9.54  | 9.29  | 8.62 | 9.64  | 9.39  |
| SUZ12        | 8.47  | 8.39  | 8.9   | 10.38 | 8.82  | 8.62 | 15.28 | 12.72 |
| TGFBRAP1     | 7.19  | 6.96  | 7.23  | 7.33  | 9.27  | 8.63 | 9.03  | 8.98  |
| TMEM128      | 6.96  | 7.21  | 9.07  | 8.7   | 9.42  | 8.63 | 11.78 | 10.16 |
| CDK13        | 8.84  | 7.97  | 10.23 | 9.77  | 8.92  | 8.63 | 10.08 | 10.2  |
| INO80        | 7.79  | 7.5   | 7.71  | 8.52  | 8.83  | 8.64 | 9.68  | 8.67  |
| ZC3H13       | 8.45  | 7.94  | 9.52  | 11.94 | 9.31  | 8.64 | 13.75 | 12.69 |
| C16orf91     | 7.83  | 8.29  | 7.94  | 8.06  | 9.19  | 8.65 | 7.3   | 7.02  |
| TICAM1       | 8.61  | 10.16 | 9.33  | 8.71  | 8.63  | 8.65 | 6.26  | 8.02  |
| URGCP        | 8.7   | 9.65  | 9.15  | 9.14  | 8.94  | 8.65 | 7.54  | 8.45  |
| ZNF668       | 7.74  | 7.82  | 8.13  | 8.02  | 8.57  | 8.66 | 7.65  | 8.2   |
| TEAD4        | 8.03  | 8.21  | 8.01  | 6.89  | 7.36  | 8.66 | 6.48  | 8.22  |
| MAP3K5       | 8.05  | 7.33  | 8.89  | 9.38  | 9.17  | 8.66 | 11.17 | 9.97  |
| LHPP         | 8.32  | 9.43  | 8     | 8.56  | 8.96  | 8.67 | 7.58  | 7.86  |
| NRN1         | 9.82  | 9.53  | 8.51  | 9.89  | 8.73  | 8.67 | 9.26  | 8.8   |
| EVI5L        | 8.93  | 9.87  | 9.44  | 7.7   | 8.85  | 8.68 | 6.58  | 7.2   |
| TANK         | 7.34  | 7.72  | 7.77  | 10.04 | 7.76  | 8.68 | 12.9  | 10.28 |
| FAM156B      | 7.69  | 5.73  | 8.43  | 10.99 | 8.81  | 8.68 | 13.58 | 11.81 |
| CTU1         | 7.71  | 6.79  | 6.6   | 6.13  | 7.35  | 8.69 | 5.15  | 5.96  |

|          |       |       |       |       |       |      |       |       |
|----------|-------|-------|-------|-------|-------|------|-------|-------|
| KIF3C    | 7.48  | 8.58  | 7.96  | 7.57  | 7.73  | 8.69 | 6.72  | 8.04  |
| ATXN1L   | 8.5   | 8.67  | 9.13  | 9.16  | 9.16  | 8.69 | 9.12  | 8.93  |
| SIAE     | 8.19  | 9.39  | 8.84  | 9.83  | 9.88  | 8.69 | 11.11 | 10.04 |
| WDR92    | 7.79  | 6.92  | 8.44  | 9.35  | 8.37  | 8.7  | 10.63 | 8.84  |
| RAB4A    | 8.27  | 8.23  | 8.3   | 8.06  | 10.62 | 8.7  | 9.67  | 9.51  |
| HSPA14   | 8.46  | 7.29  | 8.78  | 10.02 | 9.13  | 8.7  | 11.97 | 10.13 |
| TCP11L1  | 8.18  | 7.38  | 7.3   | 8.66  | 8.39  | 8.71 | 9.42  | 9.23  |
| EFR3A    | 7.41  | 6.76  | 9.14  | 9.61  | 9.29  | 8.72 | 12.85 | 11.03 |
| TNRC6A   | 8.13  | 7.29  | 9.18  | 11.17 | 8.72  | 8.72 | 12.94 | 11.69 |
| LNPEP    | 8.39  | 8.06  | 9.09  | 11.17 | 8.63  | 8.72 | 15.16 | 12.88 |
| CETN3    | 7.08  | 8.83  | 9.59  | 9.31  | 7.99  | 8.73 | 12.89 | 10.03 |
| MNAT1    | 9.24  | 9.9   | 9.8   | 10.16 | 8.43  | 8.73 | 12.46 | 10.2  |
| RAP2C    | 7.38  | 7.31  | 9.34  | 9.38  | 9.55  | 8.73 | 12.45 | 10.85 |
| GOLGA4   | 6.13  | 6.06  | 7.49  | 8.5   | 8.09  | 8.73 | 14.71 | 12.71 |
| SMG6     | 7.64  | 8.04  | 8.11  | 7.72  | 7.38  | 8.74 | 7.26  | 7.89  |
| ADCY7    | 8.43  | 7.54  | 8.62  | 8.87  | 7.99  | 8.74 | 8.8   | 8.15  |
| TBC1D2B  | 7.87  | 8.43  | 8.13  | 8.61  | 8.88  | 8.74 | 8.64  | 8.29  |
| EPOR     | 8.33  | 7.92  | 8.96  | 7.55  | 8.74  | 8.74 | 7.39  | 9.26  |
| RPS6KB1  | 6.49  | 7.23  | 8.93  | 9.91  | 8.57  | 8.74 | 15.21 | 12.42 |
| WRAP53   | 8.7   | 8.89  | 7.79  | 7.68  | 8.42  | 8.75 | 7.34  | 7.41  |
| YIPF6    | 7.31  | 7.75  | 8.66  | 9.56  | 8.34  | 8.75 | 11.6  | 11.06 |
| CCDC71L  | 9.31  | 8.88  | 8.6   | 8.06  | 8.18  | 8.76 | 7.28  | 7.3   |
| ARHGEF4  | 7.21  | 5.61  | 6.52  | 8.4   | 8.19  | 8.76 | 7.12  | 8     |
| VDR      | 8.82  | 8.85  | 9.44  | 8.2   | 8.04  | 8.76 | 7.66  | 8.1   |
| USP20    | 9.37  | 9.72  | 8.66  | 8.48  | 8.69  | 8.76 | 7.8   | 8.31  |
| TMEM237  | 7.98  | 7.58  | 9.06  | 9.16  | 8.86  | 8.76 | 10.66 | 9.55  |
| ANOS1    | 10.56 | 9.64  | 11.5  | 12.63 | 7.82  | 8.76 | 10.41 | 10.24 |
| FANCL    | 11.4  | 9.74  | 9.32  | 11.9  | 10.35 | 8.76 | 14.67 | 12.12 |
| TBL1XR1  | 8.18  | 8.27  | 9.15  | 11.19 | 8.93  | 8.76 | 14.83 | 12.83 |
| TOP3A    | 9.16  | 9.35  | 9.17  | 9.28  | 8.84  | 8.77 | 8.48  | 7.97  |
| DIRC2    | 6.73  | 7.95  | 8.15  | 7.2   | 8.11  | 8.77 | 9.56  | 8.39  |
| BCOR     | 10.99 | 10.62 | 10.82 | 11.01 | 7.78  | 8.77 | 8.87  | 9.1   |
| TSPAN5   | 8.68  | 8.79  | 8.38  | 8.99  | 8.11  | 8.77 | 8.82  | 9.13  |
| CNTNAP3  | 9.83  | 9.33  | 9.98  | 11.83 | 8.64  | 8.77 | 10.65 | 10.03 |
| YES1     | 6.73  | 6.93  | 8.22  | 10.21 | 8.49  | 8.77 | 14.58 | 12.48 |
| REV1     | 8.09  | 7.34  | 8.76  | 9.88  | 9.49  | 8.78 | 14.43 | 12.59 |
| FBXL14   | 8.34  | 8.68  | 9.3   | 7.66  | 7.75  | 8.79 | 5.41  | 6.7   |
| NMB      | 9.19  | 10.96 | 8.63  | 7.9   | 10.4  | 8.79 | 7.24  | 7.63  |
| OASL     | 13.45 | 15.4  | 14.59 | 14.02 | 9.32  | 8.79 | 7.31  | 8.39  |
| DDX6     | 8.58  | 7.73  | 9.46  | 9.83  | 9.24  | 8.79 | 10.75 | 9.43  |
| PIK3R1   | 8.14  | 6.9   | 10.15 | 11.53 | 9.38  | 8.79 | 14.02 | 12.96 |
| DYRK4    | 8.69  | 8.64  | 8.59  | 8.19  | 8.15  | 8.8  | 8.1   | 7.61  |
| BCL9     | 10.01 | 10.69 | 10.84 | 10.59 | 9.25  | 8.8  | 9.24  | 9.64  |
| ATL2     | 8.65  | 8.46  | 10.11 | 10.43 | 9.1   | 8.8  | 14.36 | 12.1  |
| PNPLA4   | 8.42  | 9.01  | 8.29  | 8.04  | 8.32  | 8.81 | 7.63  | 8.02  |
| DENND6B  | 9.36  | 10.96 | 9.18  | 9.75  | 7.83  | 8.81 | 8.02  | 8.56  |
| SYNRG    | 9.12  | 8.98  | 9.06  | 8.75  | 8.63  | 8.81 | 9.61  | 9.62  |
| AGO1     | 8.67  | 8.35  | 8.73  | 9.21  | 8.97  | 8.81 | 9     | 9.7   |
| PPP6C    | 7.94  | 7.68  | 7.77  | 8.68  | 9.51  | 8.81 | 10.62 | 9.95  |
| MDM2     | 6.11  | 5.74  | 7.27  | 8.81  | 8.94  | 8.81 | 14.23 | 12.97 |
| THOC2    | 8.1   | 7.7   | 9.97  | 11.6  | 9.3   | 8.81 | 16.27 | 14.8  |
| PCSK7    | 8.68  | 8.75  | 8.59  | 8.28  | 8.95  | 8.82 | 8.88  | 8.05  |
| CYB561D1 | 10.17 | 9.27  | 9.46  | 9.87  | 9.82  | 8.82 | 8.96  | 9.34  |
| COMMD8   | 7.1   | 8.24  | 7.38  | 7.12  | 8.49  | 8.82 | 10.98 | 9.38  |
| CCZ1B    | 9.34  | 9.67  | 12.11 | 8.02  | 13.65 | 8.82 | 12.52 | 12.62 |
| WDR4     | 9.78  | 8.71  | 8.52  | 8.07  | 8.61  | 8.84 | 8.15  | 8.58  |
| AK6      | 9.52  | 9.43  | 8.05  | 7.69  | 9.95  | 8.84 | 12.41 | 11.49 |
| TAF5L    | 9.42  | 8.97  | 10.04 | 10.22 | 10.16 | 8.85 | 9.71  | 9.22  |
| GOLPH3L  | 10.02 | 9.12  | 10.65 | 11.07 | 8.9   | 8.85 | 10.41 | 10.17 |
| ACER2    | 6.79  | 7.31  | 8.84  | 9.78  | 9.9   | 8.85 | 11.84 | 11.62 |
| IFT74    | 8.01  | 8.12  | 8.67  | 9.29  | 8.26  | 8.85 | 12.75 | 11.97 |
| RNF19A   | 8.98  | 8.17  | 10.85 | 12.24 | 8.86  | 8.85 | 15.33 | 12.39 |
| MORN2    | 8.28  | 7.42  | 7.28  | 8.68  | 7.47  | 8.86 | 9.23  | 9     |
| KCTD20   | 8.82  | 8.1   | 9.01  | 10.1  | 8.56  | 8.87 | 10.07 | 9.95  |
| RBBP5    | 8.54  | 8.05  | 8.76  | 8.85  | 8.9   | 8.87 | 10.46 | 10.2  |
| PURB     | 8.81  | 7.66  | 9.3   | 9.88  | 9.34  | 8.87 | 11.62 | 10.86 |
| USP32    | 7.34  | 7.71  | 8.44  | 9.35  | 9.35  | 8.87 | 12.29 | 11.14 |
| TGS1     | 8.29  | 7.81  | 9.45  | 8.66  | 9.74  | 8.87 | 12.95 | 11.41 |
| SCO1     | 7.72  | 7.23  | 7.8   | 8.41  | 9.26  | 8.88 | 9     | 9.74  |
| FAM216A  | 7.16  | 7.13  | 8.39  | 7.63  | 7.64  | 8.89 | 10.66 | 8.31  |
| CHCHD7   | 9.63  | 8.77  | 9.01  | 9     | 9.88  | 8.89 | 10.52 | 10.53 |
| IFT27    | 8.46  | 10.64 | 9.78  | 8.38  | 7.47  | 8.9  | 8.12  | 7.58  |
| MIEF2    | 10.09 | 10.04 | 9.83  | 9.18  | 8.95  | 8.9  | 7.16  | 7.87  |
| GTSE1    | 6.92  | 6.59  | 7.29  | 6.6   | 8.57  | 8.9  | 8.04  | 8.39  |
| HIF1AN   | 8.35  | 9.06  | 9.07  | 9.46  | 8.65  | 8.9  | 8.55  | 8.99  |
| TPD52L1  | 10.59 | 10.47 | 10.66 | 10.18 | 10.45 | 8.9  | 9.61  | 10.68 |
| EEF1E1   | 10.58 | 9.02  | 8.07  | 8.3   | 10.59 | 8.9  | 12.21 | 11.45 |
| NCOA3    | 7.54  | 7.1   | 9.08  | 9.23  | 8.84  | 8.91 | 12.68 | 11.39 |
| GTF3C3   | 9.45  | 9.27  | 9.81  | 10.44 | 10.51 | 8.91 | 12.5  | 12.14 |
| TWIST1   | 10.36 | 9.19  | 8.91  | 8.61  | 7.91  | 8.92 | 6.18  | 7.22  |
| NUAK2    | 7.67  | 8.67  | 7.89  | 7.14  | 8.08  | 8.92 | 7.98  | 8.28  |
| PRKX     | 7.12  | 6.59  | 8.16  | 8.34  | 9.5   | 8.92 | 10.67 | 10.01 |
| CTBS     | 8.6   | 8.56  | 9.59  | 10.22 | 9.54  | 8.92 | 12.75 | 11.26 |
| INPP5E   | 7.63  | 7.89  | 7.91  | 7.5   | 7.55  | 8.93 | 7.25  | 6.79  |
| RDH13    | 8.22  | 8.07  | 8.69  | 7.95  | 9.41  | 8.93 | 8.24  | 8.11  |
| ST7L     | 8.24  | 8.89  | 9.45  | 9.73  | 9.16  | 8.93 | 12.07 | 8.89  |
| DTL      | 11.21 | 10.42 | 11.95 | 12.79 | 10.04 | 8.93 | 13.4  | 10.1  |
| RFC3     | 10.02 | 8.3   | 10.85 | 9.56  | 8.47  | 8.94 | 12.14 | 11.39 |



|              |       |       |       |       |       |      |       |       |
|--------------|-------|-------|-------|-------|-------|------|-------|-------|
| RC3H2        | 7.61  | 6.5   | 8.79  | 9.68  | 8.59  | 8.94 | 13.06 | 11.79 |
| CPSF2        | 7.67  | 6.53  | 8.35  | 9.24  | 9.63  | 8.94 | 13.18 | 12.04 |
| SCAF11       | 8.32  | 7.3   | 10.12 | 12.11 | 8.88  | 8.94 | 16.9  | 14.31 |
| POLE4        | 10.06 | 10.86 | 10.22 | 9.05  | 10.82 | 8.95 | 9.26  | 7.8   |
| ASPHD1       | 8.84  | 9.03  | 8.28  | 7.5   | 9.29  | 8.95 | 9.07  | 9.44  |
| CLCN6        | 7.09  | 7.38  | 7.32  | 8.55  | 8.97  | 8.95 | 10.49 | 10.47 |
| KPNA3        | 8.41  | 7.76  | 9.83  | 10.52 | 9.73  | 8.95 | 12.84 | 11.83 |
| CFLAR        | 8.87  | 8.23  | 9.4   | 10.68 | 9.42  | 8.95 | 13.73 | 12.05 |
| TIMM8B       | 6.89  | 7.37  | 7.39  | 5.83  | 8.65  | 8.96 | 6.75  | 7.45  |
| TMEM110      | 8.3   | 8.57  | 8.23  | 8.42  | 8.46  | 8.96 | 9.18  | 8.64  |
| STRADB       | 9.6   | 9.84  | 9.44  | 9.49  | 8.84  | 8.96 | 10.7  | 9.78  |
| KLF3         | 8.88  | 8.49  | 10.08 | 11.14 | 8.91  | 8.96 | 11.75 | 12.07 |
| PLEKHH2      | 7.39  | 6.61  | 8.86  | 10.83 | 8.94  | 8.96 | 17.66 | 13.58 |
| TRIM3        | 7.14  | 8.13  | 7.38  | 7.41  | 8.81  | 8.97 | 8.34  | 7.92  |
| MIPEP        | 8.1   | 8.62  | 8.04  | 8.61  | 8.43  | 8.97 | 9.2   | 8.45  |
| NUDT15       | 6.83  | 7.27  | 7.99  | 7.98  | 8.8   | 8.97 | 10.42 | 9.87  |
| SESN1        | 8.21  | 7.01  | 8.11  | 7.88  | 10.54 | 8.97 | 12.7  | 10.9  |
| FNBP1L       | 9.68  | 8.65  | 10.37 | 13.29 | 9.77  | 8.97 | 15.05 | 13.6  |
| VEZT         | 9.01  | 8.45  | 10    | 12.11 | 9.44  | 8.98 | 13.53 | 11.58 |
| CBR3         | 9.53  | 10.22 | 10.33 | 9.1   | 8.45  | 8.99 | 6.93  | 6.94  |
| STAC         | 8.23  | 8.17  | 7.58  | 7.84  | 8.28  | 8.99 | 7.28  | 8.06  |
| SLC35E2      | 7.87  | 7.67  | 8.12  | 9.78  | 8.55  | 8.99 | 9.79  | 8.82  |
| RNF41        | 8.7   | 8.94  | 8.3   | 9.08  | 8.65  | 8.99 | 8.68  | 9.1   |
| ADAMTS1      | 8.26  | 8.43  | 8.69  | 8.04  | 9.36  | 8.99 | 9.99  | 9.91  |
| LOC105371063 | 7.73  | 12.13 | 11.17 | 8.72  | 7.99  | 8.99 | 13.22 | 11.26 |
| ALDH16A1     | 11.41 | 9.88  | 9.67  | 9.3   | 8.6   | 9    | 6.61  | 8.69  |
| GRHL3        | 4.56  | 4.25  | 4.68  | 4.52  | 8.95  | 9    | 8.39  | 9.16  |
| DPH7         | 7.68  | 8.32  | 8.98  | 8.07  | 10.59 | 9    | 9.84  | 10.39 |
| SLC25A32     | 7.79  | 7.43  | 8.11  | 9.66  | 8.69  | 9    | 13.57 | 11.3  |
| CTTNBP2NL    | 8.81  | 8.87  | 9.84  | 10.56 | 10.15 | 9    | 13.2  | 11.38 |
| PNISR        | 8     | 6.8   | 8.38  | 10.61 | 8.62  | 9    | 17.16 | 13.82 |
| CNTNAP1      | 8.69  | 9.09  | 7.95  | 8.64  | 8.4   | 9.01 | 8.42  | 8.55  |
| PBK          | 8.61  | 7.4   | 8.5   | 9.45  | 9.5   | 9.01 | 13.31 | 10.77 |
| METTL6       | 8.35  | 7.6   | 7.2   | 8.19  | 7.51  | 9.02 | 9.78  | 8.04  |
| ACOX1        | 7.7   | 7.99  | 8.34  | 8.31  | 8.67  | 9.03 | 9.94  | 9.49  |
| L3MBTL2      | 9.85  | 10.23 | 9.94  | 8.91  | 10.09 | 9.04 | 8.58  | 8.06  |
| MRPS18C      | 7.45  | 8.46  | 8.22  | 8.73  | 8.55  | 9.04 | 10.09 | 9.56  |
| BTN2A1       | 8.81  | 8.91  | 8.46  | 10.76 | 9.25  | 9.04 | 9.72  | 10.39 |
| PGM3         | 9.94  | 8.35  | 11.4  | 13.16 | 9.78  | 9.04 | 13.92 | 11.83 |
| NUDT11       | 8.54  | 8.7   | 8.31  | 9.18  | 8.78  | 9.05 | 10.13 | 9.11  |
| TMEM65       | 9.6   | 8.37  | 8.32  | 9.76  | 9.35  | 9.05 | 8.66  | 9.54  |
| NUDT8        | 11.11 | 10.32 | 10.37 | 8.65  | 8.65  | 9.06 | 7.11  | 8.15  |
| TRIM4        | 8.56  | 8.76  | 8.75  | 8.87  | 8.69  | 9.06 | 9.62  | 9.07  |
| SMCR8        | 8.76  | 7.67  | 9.05  | 8.76  | 9.34  | 9.06 | 9.15  | 9.42  |
| EXOSC8       | 8.67  | 8.44  | 9.32  | 10.21 | 10.75 | 9.06 | 14.39 | 10.12 |
| ADAT1        | 8.04  | 8.12  | 8.26  | 9.64  | 9.12  | 9.06 | 11.08 | 10.18 |
| ZNF263       | 8.72  | 8.89  | 8.21  | 8.32  | 9.22  | 9.07 | 8.42  | 8.72  |
| C7           | 6.71  | 7.99  | 7.58  | 8.22  | 7.82  | 9.07 | 9.67  | 9.25  |
| NUS1         | 7.25  | 6.82  | 8.27  | 8.16  | 8.63  | 9.07 | 13.11 | 9.92  |
| GON4L        | 9.29  | 8.75  | 10.02 | 10.88 | 9.47  | 9.07 | 11.26 | 10.76 |
| NPIP5        | 7.29  | 8.23  | 9.78  | 14.19 | 9.31  | 9.07 | 16.93 | 15.46 |
| CEMIP        | 4.47  | 4.73  | 4.68  | 4.86  | 8.44  | 9.08 | 8.67  | 9.34  |
| NUMB         | 8.75  | 8.14  | 9.18  | 9.96  | 9.5   | 9.08 | 10.49 | 10.88 |
| USP34        | 7.53  | 7.16  | 9.09  | 11.06 | 9.04  | 9.08 | 16.81 | 14.54 |
| MSH3         | 7.99  | 6.58  | 8.29  | 9.51  | 9.37  | 9.09 | 12.62 | 10.84 |
| ARHGAP21     | 8.68  | 7.85  | 9.83  | 11.47 | 9.23  | 9.09 | 13.71 | 12.48 |
| FUZ          | 9.28  | 10.16 | 8.05  | 9.22  | 8.09  | 9.1  | 6.33  | 5.97  |
| TRIM35       | 8.45  | 9.35  | 7.83  | 8.03  | 9.34  | 9.1  | 7.49  | 8.71  |
| RIDA         | 8.78  | 8.29  | 9.68  | 9.63  | 10.04 | 9.1  | 15.53 | 11.2  |
| SUV39H1      | 9.52  | 9.64  | 8.93  | 8.49  | 9.38  | 9.11 | 8.03  | 7.72  |
| ZNF276       | 6.98  | 7.43  | 7.25  | 7.79  | 8.88  | 9.11 | 9.1   | 8.96  |
| WDR48        | 8.21  | 8.19  | 8.98  | 8.56  | 9.67  | 9.11 | 11.91 | 10.42 |
| PLEKHA5      | 9.32  | 8.24  | 10.04 | 12.16 | 9.58  | 9.11 | 13.06 | 12.62 |
| HSPB8        | 8.71  | 8.81  | 8.27  | 6.79  | 11.19 | 9.12 | 9.41  | 8.71  |
| HIRIP3       | 11.17 | 10.13 | 9.5   | 11.52 | 10.22 | 9.12 | 9.59  | 9.23  |
| CCDC109B     | 9.49  | 8.77  | 8.99  | 9.23  | 10.03 | 9.13 | 9.21  | 7.62  |
| SLC4A1AP     | 8.2   | 7.22  | 9.08  | 8.71  | 9.39  | 9.13 | 9.65  | 8.87  |
| RAB2B        | 9.35  | 8.86  | 8.71  | 9.15  | 8.75  | 9.14 | 10.5  | 8.84  |
| DTX3         | 9.75  | 10.05 | 8.96  | 9.18  | 9.53  | 9.15 | 9.02  | 9.56  |
| MALL         | 9.32  | 9.11  | 9.17  | 8.64  | 9.29  | 9.15 | 9.3   | 9.6   |
| UBE3B        | 9.03  | 9.12  | 8.43  | 9.54  | 9.53  | 9.15 | 9.69  | 11.22 |
| KIF13B       | 9.36  | 9.11  | 8.85  | 8.62  | 9.22  | 9.16 | 8.21  | 8.78  |
| TK2          | 10.31 | 11.11 | 10.09 | 10    | 8.48  | 9.16 | 9.56  | 9.2   |
| GNB5         | 10.12 | 8.92  | 9.04  | 9.37  | 9.87  | 9.16 | 9.37  | 9.37  |
| GIGYF2       | 9.25  | 9.13  | 10.24 | 10.36 | 10.04 | 9.16 | 10.3  | 10.61 |
| MED4         | 9.35  | 9.46  | 9.86  | 10.61 | 10.68 | 9.16 | 14.44 | 11.6  |
| NAV1         | 9.38  | 9.18  | 9.3   | 9.53  | 9.24  | 9.17 | 9.83  | 9.66  |
| TMEM231      | 9.92  | 10.39 | 10.02 | 9.28  | 9.04  | 9.18 | 8.52  | 9.32  |
| HIPK2        | 9.38  | 9.29  | 9.97  | 11.04 | 8.56  | 9.18 | 9.97  | 10.45 |
| SMC2         | 8.68  | 8.34  | 9.68  | 11.37 | 9.73  | 9.18 | 16.86 | 14.18 |
| RAD17        | 9.19  | 7.21  | 9.83  | 10.6  | 9.57  | 9.18 | 16.34 | 14.52 |
| GZF1         | 9.25  | 9.05  | 10.1  | 9.59  | 8.47  | 9.2  | 10.27 | 8.45  |
| CCNA2        | 7.54  | 6.25  | 7.36  | 7.41  | 8.8   | 9.2  | 10.88 | 9.45  |

|          |       |       |       |       |       |      |       |       |
|----------|-------|-------|-------|-------|-------|------|-------|-------|
| C15orf40 | 8.67  | 6.91  | 9.14  | 9.61  | 9.18  | 9.2  | 10.99 | 9.59  |
| DHTKD1   | 8.56  | 9.08  | 9.23  | 8.82  | 9.01  | 9.2  | 9.93  | 10    |
| COIL     | 8.96  | 8.84  | 9.45  | 10.52 | 10.33 | 9.21 | 12.66 | 11.9  |
| FNBP4    | 9.21  | 8.32  | 9.7   | 11.38 | 10.7  | 9.21 | 16.02 | 14.08 |
| MICAL3   | 8.44  | 9.06  | 8.59  | 8.53  | 8.92  | 9.22 | 8.73  | 8.84  |
| C1orf198 | 10.52 | 10.38 | 9.43  | 9.06  | 9.54  | 9.22 | 8.78  | 8.96  |
| DBNDD2   | 8.68  | 7.73  | 7.86  | 7.65  | 9.85  | 9.23 | 9.51  | 8.99  |
| MR1      | 9.23  | 9.69  | 9.7   | 9.77  | 9.86  | 9.23 | 10.86 | 9.44  |
| SNX19    | 7.86  | 7.23  | 8.33  | 8.64  | 8.66  | 9.23 | 10.74 | 10.75 |
| KIF18B   | 7.02  | 6.92  | 7.39  | 7.9   | 8.61  | 9.24 | 9.44  | 9.28  |
| NUPL2    | 8.29  | 7.43  | 8.78  | 9.86  | 9     | 9.24 | 12.84 | 11.26 |
| GJD3     | 9.39  | 9.62  | 8.94  | 8.86  | 8.9   | 9.25 | 6.8   | 8.1   |
| KAT14    | 9.78  | 9.61  | 10.13 | 10.21 | 10.7  | 9.25 | 10.06 | 9.45  |
| KDM1B    | 10.19 | 8.89  | 10.19 | 10.39 | 10.17 | 9.25 | 11.56 | 10.71 |
| WDR41    | 8.6   | 9.3   | 10.35 | 11.74 | 9.87  | 9.25 | 12.67 | 11.2  |
| ZMYM4    | 9.59  | 9.13  | 11.06 | 13.02 | 9.91  | 9.25 | 14.2  | 12.52 |
| KIAA0754 | 7.63  | 7.04  | 7.71  | 7.72  | 8.41  | 9.26 | 9.74  | 9.05  |
| MED13    | 8.32  | 7.67  | 10.07 | 12.1  | 9.84  | 9.26 | 15.21 | 13.46 |
| ANTXR2   | 9.18  | 8.39  | 10.82 | 10.27 | 9.13  | 9.27 | 11.14 | 10.56 |
| ANKMY2   | 8.59  | 8.48  | 9.08  | 9.91  | 8.51  | 9.27 | 13.09 | 10.73 |
| SLC30A6  | 9.08  | 8.14  | 8.86  | 9.48  | 9.84  | 9.27 | 13.48 | 11.31 |
| VPS45    | 9.61  | 8.51  | 9.88  | 11.28 | 10.12 | 9.27 | 13.48 | 11.42 |
| UGDH     | 9.5   | 8.52  | 10.12 | 11.02 | 9.8   | 9.27 | 12.46 | 12.11 |
| TRIM7    | 8.17  | 7.24  | 7.03  | 6.53  | 8.44  | 9.28 | 6.87  | 6.99  |
| C11orf1  | 10.75 | 9.62  | 10.62 | 9.41  | 10.42 | 9.28 | 9.29  | 7.9   |
| KIAA0556 | 8.85  | 8.06  | 8.96  | 8.98  | 8.98  | 9.28 | 8.59  | 8.53  |
| RNF121   | 8.62  | 9.17  | 9.74  | 8.1   | 9.13  | 9.28 | 9.39  | 9.1   |
| CLASP1   | 9.13  | 8.81  | 9.49  | 10.85 | 9.51  | 9.28 | 11.21 | 10.34 |
| CAB39    | 7.73  | 7.2   | 8.32  | 9.77  | 9.08  | 9.28 | 12.78 | 10.87 |
| NR2C2    | 7.88  | 7.33  | 8.41  | 9.64  | 8.84  | 9.28 | 12.43 | 10.89 |
| C15orf52 | 8.46  | 8.23  | 8.5   | 9.05  | 11.99 | 9.28 | 12.31 | 10.99 |
| NT5C3A   | 7.81  | 8.32  | 9.08  | 10.09 | 9.2   | 9.28 | 13.67 | 11.24 |
| MORN1    | 9.39  | 9.8   | 9.3   | 10.02 | 9.05  | 9.29 | 7.49  | 8.13  |
| ZNF212   | 8.27  | 9.15  | 8.19  | 8.12  | 9.18  | 9.29 | 7.76  | 8.69  |
| NCAPD3   | 7.91  | 8.68  | 8.45  | 9.17  | 9.45  | 9.29 | 10.01 | 9.11  |
| APBB3    | 8.99  | 7.86  | 8.65  | 8.13  | 9.26  | 9.29 | 11.63 | 9.7   |
| LCP1     | 8.29  | 8.79  | 8.92  | 9.49  | 9.6   | 9.29 | 10.19 | 10.13 |
| MRPL42   | 9.11  | 8.93  | 9.18  | 10.75 | 10.04 | 9.29 | 14.62 | 11.62 |
| R3HDM1   | 8.98  | 8.29  | 9.24  | 9.9   | 10.16 | 9.29 | 12.45 | 11.89 |
| POMGNT2  | 9.52  | 10.49 | 9.79  | 9.24  | 8.26  | 9.3  | 7.21  | 7.85  |
| FOXRED2  | 8.69  | 8.55  | 8.94  | 8.67  | 8.3   | 9.3  | 8.38  | 8.92  |
| LIMK2    | 10.08 | 9.98  | 10.67 | 10.22 | 9.14  | 9.3  | 10.07 | 9.17  |
| CAMSAP1  | 8.68  | 8.02  | 8.55  | 8.73  | 9.01  | 9.3  | 8.62  | 9.33  |
| ENC1     | 9.27  | 8.33  | 9.16  | 9.42  | 8.72  | 9.3  | 11.01 | 10.06 |
| NXF2     | 9.01  | 10.21 | 9.67  | 10.15 | 10.06 | 9.3  | 10.67 | 10.25 |
| CDCA3    | 6.81  | 7.24  | 7.56  | 5.95  | 9.25  | 9.31 | 8.54  | 8.01  |
| CCDC107  | 11.41 | 12.1  | 11.17 | 9.99  | 9.89  | 9.31 | 7.67  | 8.07  |
| RBM19    | 8.23  | 7.21  | 8.26  | 8.18  | 9.84  | 9.31 | 10.49 | 9.57  |
| PLS1     | 7.76  | 7.96  | 9.33  | 10.41 | 9.13  | 9.31 | 15.6  | 12.42 |
| BCAN     | 13.94 | 12.45 | 12.76 | 12.27 | 8.38  | 9.32 | 8.51  | 8.5   |
| FHOD3    | 9.69  | 10    | 9.78  | 10.16 | 9     | 9.32 | 9.39  | 9.25  |
| DNAL4    | 10.12 | 10.88 | 10.23 | 10.02 | 9.57  | 9.32 | 7.98  | 9.26  |
| VRK1     | 9.13  | 9.05  | 10.36 | 9.49  | 10.22 | 9.32 | 11.58 | 9.28  |
| HSDL1    | 8.6   | 7.59  | 9.22  | 10.46 | 9.43  | 9.32 | 12.1  | 10.21 |
| AMMECR1L | 7     | 9.15  | 8.45  | 8.73  | 7.38  | 9.33 | 10.42 | 9.63  |
| ARID1B   | 9.35  | 8.14  | 9.13  | 10.2  | 8.39  | 9.33 | 9.04  | 9.68  |
| ST6GAL1  | 8.83  | 8.94  | 9.03  | 8.94  | 10.02 | 9.33 | 9.9   | 10.2  |
| PDCL     | 9.08  | 9.33  | 9.92  | 10.68 | 10.71 | 9.33 | 11.25 | 10.27 |
| ARMC5    | 8.38  | 7.75  | 7.62  | 6.92  | 8.06  | 9.34 | 5.83  | 6.96  |
| ABCC3    | 9.19  | 9.1   | 9.88  | 9.68  | 8.16  | 9.34 | 8.57  | 8.15  |
| FBXO38   | 8.61  | 7.54  | 8.95  | 9.29  | 8.96  | 9.34 | 11.73 | 9.78  |
| DDIT3    | 10.31 | 11.52 | 12.16 | 12.11 | 10.87 | 9.34 | 11.12 | 9.91  |
| SPG11    | 8.1   | 7.12  | 9.4   | 9.98  | 8.74  | 9.34 | 12.17 | 10.93 |
| EGLN1    | 12.17 | 10.56 | 12.5  | 13.42 | 9.42  | 9.34 | 12.42 | 11.07 |
| DOCK7    | 10.01 | 8.09  | 10.71 | 11.97 | 9.39  | 9.35 | 14.32 | 12.22 |
| GLIS2    | 10.47 | 10.89 | 10.47 | 9.57  | 9.04  | 9.36 | 7.4   | 8.25  |
| MTHFSD   | 9.43  | 10.33 | 9.02  | 9.09  | 9.73  | 9.36 | 9.33  | 9.57  |
| TRIM32   | 11.23 | 10.55 | 11.2  | 11.52 | 9.14  | 9.36 | 11.05 | 11.15 |
| AKAP17A  | 10.11 | 9.23  | 9.71  | 10.12 | 9.92  | 9.37 | 9.3   | 9.49  |
| COX10    | 8.33  | 7.84  | 7.9   | 8.13  | 9.76  | 9.37 | 9.89  | 9.8   |
| ETV3     | 9.82  | 7.98  | 8.88  | 9.89  | 10.01 | 9.37 | 10.25 | 10.55 |
| ZCCHC7   | 7.01  | 7.02  | 9.07  | 10.1  | 9.48  | 9.37 | 12.42 | 10.63 |
| NAXD     | 9.14  | 8.88  | 8.28  | 9.02  | 9.22  | 9.38 | 9.45  | 8.78  |
| KCNK1    | 9.32  | 9.55  | 10.1  | 9.79  | 9.97  | 9.38 | 9.49  | 10.21 |
| SUCLA2   | 7.7   | 8.24  | 9.5   | 9.16  | 9.31  | 9.38 | 14.15 | 10.53 |
| PUDP     | 8.19  | 8.49  | 10.23 | 9.25  | 9.93  | 9.39 | 9.5   | 9.26  |
| MSRA     | 11.89 | 10.44 | 11.1  | 10.57 | 9.64  | 9.39 | 7.94  | 9.27  |
| MFSD13A  | 8.22  | 8.46  | 8.69  | 7.75  | 10.05 | 9.39 | 9.17  | 9.62  |
| GTF3C4   | 8.96  | 8.45  | 9.17  | 9.94  | 10.23 | 9.39 | 11.23 | 9.72  |
| DNAJC19  | 9.34  | 8.52  | 8.59  | 8.43  | 10.46 | 9.39 | 12.72 | 11.4  |
| CELSR3   | 7.94  | 8.16  | 7.98  | 7.96  | 8.19  | 9.4  | 7.71  | 8.21  |
| TTL      | 8.11  | 8.3   | 7.54  | 8.72  | 9.31  | 9.4  | 10.66 | 10.17 |
| DHX32    | 9.02  | 9.26  | 9.6   | 9.54  | 9.67  | 9.4  | 10.47 | 10.22 |
| RNASEH2C | 9.81  | 10.12 | 9.47  | 9.24  | 9.35  | 9.41 | 8.52  | 8.57  |
| ARHGAP27 | 8.67  | 9.11  | 7.72  | 8.69  | 9.03  | 9.41 | 7.82  | 9.1   |

|              |       |       |       |       |       |      |       |       |
|--------------|-------|-------|-------|-------|-------|------|-------|-------|
| PRUNE        | 10.57 | 10.96 | 11.7  | 10.83 | 10.13 | 9.41 | 10.9  | 11.11 |
| SMC6         | 8     | 8.62  | 8.81  | 9.77  | 9.5   | 9.41 | 14.8  | 13.02 |
| L1CAM        | 10.6  | 10.68 | 10.58 | 10.43 | 9.55  | 9.42 | 8.17  | 8.51  |
| TOX2         | 11.9  | 11.23 | 10.34 | 10.72 | 8.25  | 9.42 | 8.34  | 8.55  |
| OSBPL1A      | 9.86  | 8.72  | 9.37  | 10.11 | 9.59  | 9.42 | 11.82 | 10.12 |
| RPUSD2       | 9.56  | 9.06  | 8.73  | 8.7   | 8.85  | 9.43 | 7.43  | 6.86  |
| LOC105379554 | 8.65  | 8.76  | 9.27  | 8.54  | 9.69  | 9.43 | 8.84  | 7.59  |
| DUS3L        | 9.54  | 8.57  | 8.68  | 8.37  | 9.33  | 9.43 | 8.18  | 8.34  |
| SZT2         | 9.25  | 9.51  | 9.52  | 9.5   | 8.98  | 9.43 | 9.7   | 9.8   |
| POLR1B       | 8.65  | 7.93  | 8.63  | 9.02  | 9.9   | 9.43 | 11.47 | 10.32 |
| STOM         | 9.3   | 8.08  | 9.72  | 9.91  | 11.28 | 9.43 | 12.18 | 10.75 |
| ITGB3        | 9.15  | 9.85  | 9.5   | 10.14 | 11.09 | 9.43 | 12.12 | 10.86 |
| FYTTD1       | 9.16  | 8.56  | 9.62  | 11.15 | 9.51  | 9.43 | 12.44 | 11.78 |
| MAST3        | 9     | 9.29  | 8.77  | 9.1   | 9.15  | 9.44 | 8     | 8.76  |
| DTNBP1       | 11.16 | 10.72 | 10.21 | 11.02 | 10.07 | 9.44 | 8.44  | 9     |
| LIF          | 8.38  | 8.63  | 8.39  | 8.67  | 9.88  | 9.44 | 8.75  | 9.04  |
| SLC7A6OS     | 8.48  | 7.94  | 7.65  | 8.76  | 9.03  | 9.44 | 9.32  | 9.35  |
| DIP2A        | 8.2   | 8.62  | 9.04  | 9.55  | 9.45  | 9.44 | 10.44 | 10.37 |
| ICAM3        | 8.43  | 9.13  | 8.23  | 7.38  | 8.83  | 9.45 | 7.02  | 7.65  |
| ZCCHC14      | 7.38  | 7.53  | 8.96  | 9.34  | 9.02  | 9.45 | 9.03  | 9.16  |
| MCM6         | 10.97 | 10.6  | 11.65 | 11.55 | 8.91  | 9.45 | 10.56 | 10.23 |
| BAHD1        | 9.94  | 10.95 | 9.87  | 8.86  | 9.4   | 9.46 | 7.63  | 8.85  |
| HACL1        | 11.59 | 9.83  | 9.55  | 9.79  | 10.89 | 9.46 | 11.62 | 10.07 |
| CBFA2T2      | 9.41  | 9.04  | 10.19 | 10.41 | 9.08  | 9.46 | 10.29 | 10.26 |
| RPAIN        | 9.01  | 8.06  | 9.14  | 10.09 | 10.32 | 9.46 | 12.08 | 10.54 |
| SNAPC5       | 6.66  | 6.92  | 6.03  | 9.42  | 10.39 | 9.46 | 8.6   | 10.82 |
| STXBP3       | 8.68  | 8.75  | 9.25  | 10.94 | 9.9   | 9.46 | 17.21 | 13.62 |
| FIZ1         | 10.4  | 10.71 | 10.36 | 9.59  | 9.06  | 9.47 | 6.93  | 7.74  |
| PDCD7        | 9.6   | 9.36  | 9.62  | 9.85  | 9.18  | 9.47 | 8.54  | 8.95  |
| NOTCH2       | 9.63  | 9.44  | 10.02 | 10.28 | 9.37  | 9.47 | 10.52 | 10.52 |
| C4orf3       | 12.87 | 12.22 | 12.75 | 14.44 | 9.41  | 9.47 | 11.93 | 11.49 |
| MAPK6        | 8.24  | 8.2   | 10.31 | 10.94 | 9.96  | 9.47 | 14.28 | 12.26 |
| FBXO31       | 9.2   | 8.89  | 8.53  | 8.53  | 9.45  | 9.48 | 8.07  | 8.55  |
| FAM160A2     | 9.04  | 8.87  | 9.65  | 10.06 | 9.28  | 9.48 | 10.34 | 10.67 |
| NRBF2        | 10.24 | 8.76  | 9.34  | 10.72 | 10.54 | 9.48 | 12.13 | 11.08 |
| C1orf109     | 8.78  | 7.81  | 7.55  | 8.26  | 10.41 | 9.49 | 10.71 | 9.66  |
| CEP250       | 9.76  | 9.68  | 10.62 | 10.36 | 10.11 | 9.49 | 10.99 | 10.05 |
| CHFR         | 8.97  | 8     | 9.05  | 8.6   | 9.17  | 9.5  | 8.04  | 8.15  |
| REXO2        | 7.03  | 7.42  | 7.25  | 7.41  | 9.79  | 9.5  | 9.39  | 10.11 |
| SVIL         | 9.47  | 9.04  | 9.95  | 10.35 | 9.9   | 9.5  | 10.91 | 10.22 |
| PAN2         | 9.62  | 9.17  | 9.59  | 9.83  | 9.76  | 9.5  | 11.81 | 10.42 |
| PNPT1        | 10.81 | 8.98  | 11.16 | 13.81 | 10.07 | 9.5  | 15.07 | 12.86 |
| SUFU         | 10.33 | 10.04 | 9.42  | 10.43 | 8.96  | 9.51 | 7.77  | 8.65  |
| MTMR12       | 10.12 | 7.86  | 10    | 10.01 | 9.97  | 9.52 | 11.37 | 9.91  |
| GPR89A       | 7.67  | 7.4   | 8.23  | 8.64  | 9.07  | 9.53 | 12.01 | 7.64  |
| LTBP2        | 8.53  | 8.06  | 8.4   | 8.8   | 8.93  | 9.53 | 8.55  | 9.06  |
| CLYBL        | 8.42  | 8.2   | 7.94  | 7.94  | 9.19  | 9.53 | 10.96 | 9.21  |
| ACVR1        | 8.86  | 10.11 | 10.87 | 10.05 | 9.37  | 9.53 | 10.89 | 9.53  |
| TBC1D7       | 9.59  | 10.93 | 10.07 | 10.48 | 10.83 | 9.53 | 10.68 | 10.69 |
| SCAF8        | 10.04 | 9.55  | 11.05 | 12.04 | 9.98  | 9.53 | 12.18 | 11.76 |
| TRNAU1AP     | 8.68  | 8.74  | 8.66  | 7.56  | 9.19  | 9.54 | 8.7   | 6.88  |
| LRRC8D       | 8.5   | 7.29  | 9.66  | 9.82  | 10.19 | 9.55 | 13.12 | 11.22 |
| RILP         | 8.96  | 9.02  | 9.35  | 7.29  | 8.61  | 9.56 | 7.6   | 8.01  |
| NACC2        | 8.98  | 8.33  | 9.23  | 8.92  | 9.39  | 9.56 | 8.71  | 8.85  |
| FBXW9        | 11.02 | 9.54  | 9.43  | 10.22 | 10.47 | 9.56 | 8.2   | 9.09  |
| ZKSCAN5      | 8.69  | 9.13  | 9.67  | 9.74  | 10.19 | 9.56 | 10.5  | 11.27 |
| PAK6         | 7.39  | 6.86  | 8.29  | 7.08  | 9.34  | 9.57 | 7.1   | 6.51  |
| MOCS3        | 10.19 | 8.74  | 9.23  | 8.34  | 9.16  | 9.57 | 8.74  | 8.51  |
| MBP          | 8.52  | 7.66  | 8.75  | 8.87  | 10.41 | 9.57 | 9.89  | 9.84  |
| TRIM21       | 14.8  | 15.82 | 14.44 | 14.73 | 11.42 | 9.57 | 9.45  | 11.3  |
| PLEKHG3      | 9.26  | 9.45  | 9.42  | 8.53  | 8.53  | 9.58 | 8.14  | 8.35  |
| SMG8         | 9.4   | 9.74  | 9.9   | 9.04  | 9.01  | 9.58 | 10.34 | 9.2   |
| PARP9        | 17.38 | 15.87 | 17.04 | 19.8  | 9.62  | 9.58 | 13.26 | 9.92  |
| USP40        | 8.96  | 9.32  | 10.09 | 9.53  | 9.94  | 9.58 | 11.38 | 10.42 |
| APITD1       | 8.59  | 9.09  | 9.35  | 10.36 | 10.22 | 9.58 | 10.72 | 11.21 |
| NUF2         | 8.36  | 7.7   | 8.33  | 9.19  | 9.55  | 9.58 | 15.08 | 11.27 |
| SLTM         | 8.36  | 8.31  | 9.8   | 12.88 | 10.55 | 9.58 | 15.75 | 15.78 |
| CHST3        | 8.64  | 9.15  | 8.64  | 8.38  | 8.63  | 9.59 | 8.54  | 8.83  |
| SLC29A2      | 8.21  | 9.17  | 8.66  | 9.11  | 7.98  | 9.59 | 7.99  | 9.48  |
| STK35        | 8.87  | 9.81  | 8.98  | 8.65  | 9.34  | 9.59 | 8.96  | 9.5   |
| NKAP         | 9.1   | 9.57  | 7.82  | 9.87  | 9.38  | 9.59 | 11.51 | 10.47 |
| CDCA7        | 9.94  | 9.99  | 10.91 | 10.59 | 11.53 | 9.59 | 12.54 | 10.72 |
| IRX2         | 9.45  | 8.77  | 9.9   | 9.25  | 8.61  | 9.6  | 7.86  | 7.66  |
| ZNF771       | 10.36 | 9.8   | 10.23 | 9.88  | 8.14  | 9.6  | 6.45  | 9.36  |
| SLC4A3       | 10.37 | 11.94 | 10    | 10.67 | 9.01  | 9.6  | 8.77  | 9.74  |
| PTCD3        | 7.81  | 7.2   | 8.22  | 9.77  | 9.72  | 9.6  | 13.31 | 12.08 |
| TMEM212      | 7.52  | 6.53  | 9.18  | 11.78 | 8.21  | 9.6  | 17.61 | 16.05 |
| TFAP4        | 10.13 | 9.5   | 10.17 | 9.6   | 10.87 | 9.61 | 8.55  | 9.25  |
| ADCY6        | 9.96  | 9.99  | 10.28 | 10.29 | 9.27  | 9.61 | 9     | 9.51  |
| PTPRE        | 8.53  | 6.69  | 8.8   | 9.01  | 9.57  | 9.61 | 11.55 | 10.5  |
| GAR1         | 8.15  | 9.53  | 10.21 | 10.7  | 11.87 | 9.61 | 11.69 | 12.95 |
| PAPD4        | 9.17  | 7.8   | 9.72  | 11.89 | 9.65  | 9.61 | 13.65 | 13.55 |
| SLC46A1      | 10.02 | 10.19 | 9.58  | 9.07  | 10    | 9.62 | 9.57  | 9.53  |
| CREBBP       | 10.28 | 9.71  | 10.07 | 10.56 | 9.55  | 9.62 | 9.34  | 9.81  |
| MAMDC2       | 11.49 | 10.94 | 11.51 | 11.97 | 9.42  | 9.62 | 12.37 | 10.77 |

|              |       |       |       |       |       |      |       |       |
|--------------|-------|-------|-------|-------|-------|------|-------|-------|
| SLC35E4      | 7.33  | 8.79  | 7.32  | 7.47  | 8.68  | 9.63 | 6.14  | 7.56  |
| ECHDC1       | 8.31  | 8.28  | 9.46  | 10.35 | 10.84 | 9.63 | 15.41 | 13.1  |
| CAPN7        | 8.83  | 8.78  | 9.11  | 9.91  | 9.68  | 9.64 | 13.27 | 11.72 |
| LARP7        | 9.1   | 9.92  | 9.49  | 10.91 | 10.1  | 9.65 | 13.09 | 12.25 |
| LRRC24       | 10.35 | 9.44  | 8.91  | 6.87  | 7.06  | 9.66 | 6.73  | 5.83  |
| SPATA33      | 9.55  | 9.05  | 8.9   | 9.61  | 9.87  | 9.66 | 7.25  | 7.9   |
| TOB2         | 9.01  | 9.56  | 9.37  | 9.38  | 9.17  | 9.66 | 8.09  | 9.02  |
| TMEM80       | 8.61  | 10.06 | 10.09 | 11.01 | 10.56 | 9.66 | 10.81 | 11.1  |
| COPS2        | 8.39  | 10.09 | 9.6   | 9.86  | 10.67 | 9.66 | 13.99 | 11.7  |
| C18orf21     | 10.22 | 8.15  | 9.24  | 9.53  | 10.97 | 9.66 | 13.94 | 11.89 |
| LOC100996717 | 8.89  | 8.18  | 9.26  | 9.47  | 9     | 9.67 | 7.44  | 9.31  |
| ASIC1        | 10.92 | 11.8  | 10.59 | 10.96 | 9.54  | 9.67 | 8.71  | 10.22 |
| MSL3         | 9.05  | 7.62  | 9.62  | 11.02 | 10.1  | 9.67 | 11.01 | 10.71 |
| DYNLT3       | 9.46  | 9.56  | 8.95  | 9.55  | 10.5  | 9.67 | 14.76 | 11.84 |
| TROAP        | 8.38  | 8.11  | 6.56  | 6.11  | 9.33  | 9.68 | 9.87  | 8.3   |
| KANK1        | 11.65 | 10.32 | 10.8  | 11.21 | 9.75  | 9.68 | 11.02 | 10.34 |
| GSTA4        | 10.99 | 12    | 13.07 | 12.16 | 11.66 | 9.68 | 14.2  | 11.49 |
| BBC3         | 7.55  | 7.27  | 7.75  | 7.58  | 9.02  | 9.69 | 6.58  | 6.94  |
| SMARCAL1     | 10.77 | 9.02  | 10.18 | 10.41 | 9.99  | 9.69 | 9.6   | 9.23  |
| SELENBP1     | 13.49 | 12.96 | 12.64 | 12.18 | 9.38  | 9.69 | 9.95  | 10.21 |
| C1orf131     | 8.83  | 8.02  | 9.99  | 9.07  | 9.26  | 9.69 | 12.49 | 11.49 |
| GPSM2        | 7.64  | 6.66  | 8.06  | 8.49  | 9.77  | 9.69 | 14.22 | 12.04 |
| MAD2L1       | 11.6  | 10.9  | 11.55 | 11.52 | 13.26 | 9.69 | 17.8  | 13.17 |
| SH3PXD2B     | 11.01 | 11.26 | 10.38 | 10.48 | 9     | 9.7  | 8.51  | 8.68  |
| SEMA4C       | 12.23 | 11.03 | 11.85 | 11.16 | 9.19  | 9.7  | 8.71  | 9.55  |
| C8orf76      | 8.8   | 9.55  | 9.92  | 10.57 | 11.5  | 9.7  | 10.62 | 9.75  |
| MORN4        | 8.43  | 8.68  | 8.45  | 8.37  | 10.17 | 9.7  | 10.18 | 10.25 |
| SLC25A33     | 8.55  | 9.96  | 8.22  | 8.67  | 10.12 | 9.7  | 10.39 | 10.66 |
| ATMIN        | 9.19  | 8.94  | 9.9   | 10.22 | 9.36  | 9.7  | 11.5  | 10.68 |
| ZFP90        | 9.35  | 8.92  | 9.49  | 11.38 | 9.61  | 9.7  | 12.83 | 11.25 |
| RSU1         | 9.23  | 9.34  | 9.57  | 9.73  | 11.3  | 9.7  | 11.14 | 11.57 |
| RINT1        | 8.83  | 8.04  | 9.89  | 10.42 | 10.51 | 9.7  | 13.53 | 12.1  |
| CACFD1       | 10.32 | 10.5  | 10.36 | 9.76  | 9.24  | 9.71 | 7.47  | 8.61  |
| TMED5        | 8.24  | 8.39  | 9.04  | 10    | 9.51  | 9.71 | 13.98 | 12.3  |
| SLC2A9       | 10.44 | 10.77 | 10.31 | 10.71 | 9.45  | 9.72 | 10.14 | 9.63  |
| SETMAR       | 9.28  | 8.75  | 10.68 | 11.78 | 8.86  | 9.72 | 11.99 | 10.19 |
| CHEK2        | 9.56  | 8.54  | 8.85  | 8.82  | 9.26  | 9.72 | 11.27 | 10.38 |
| ANKRD36C     | 7.26  | 6.5   | 8.37  | 9.9   | 8.49  | 9.72 | 16.95 | 13.81 |
| RNF135       | 9.08  | 9.2   | 8.5   | 9.08  | 9.37  | 9.73 | 8.51  | 8.2   |
| BRF2         | 10.25 | 10.25 | 9.69  | 8.41  | 9.08  | 9.73 | 8.99  | 8.85  |
| DGKD         | 9.26  | 8.17  | 8.78  | 9.31  | 9.95  | 9.73 | 10.16 | 9.43  |
| MPHOSPH10    | 8.41  | 8.87  | 9.91  | 10.75 | 9.55  | 9.73 | 15.93 | 13.17 |
| TMEM187      | 9.69  | 9.99  | 9.27  | 10    | 8.42  | 9.74 | 7.58  | 8.14  |
| MAPK8IP3     | 9.17  | 8.96  | 9.18  | 9.74  | 9.38  | 9.74 | 10.08 | 9.71  |
| NPR2         | 9.37  | 9.5   | 9.78  | 9.64  | 10.09 | 9.74 | 10.5  | 11.03 |
| PHF6         | 7.56  | 7.47  | 8.97  | 11.23 | 9.24  | 9.74 | 14.88 | 13.53 |
| HOXA3        | 10.06 | 9.72  | 9.62  | 10.39 | 9.66  | 9.75 | 8.15  | 9.43  |
| FAM174A      | 8.83  | 8.99  | 9.5   | 9.15  | 8.84  | 9.75 | 8.78  | 9.67  |
| GCC1         | 9.01  | 9.04  | 9.19  | 10.22 | 9.83  | 9.75 | 10.35 | 9.97  |
| SLC35G2      | 7.37  | 7.51  | 8.04  | 7.97  | 8.94  | 9.75 | 10.09 | 10.86 |
| MEGF9        | 7.24  | 6.73  | 8.19  | 9.22  | 9.43  | 9.75 | 12.92 | 11.21 |
| TSPAN15      | 9.7   | 10.63 | 9.04  | 8.93  | 9.27  | 9.76 | 7.9   | 8.48  |
| B3GNT7       | 11.29 | 11.96 | 10.76 | 10.4  | 8.36  | 9.76 | 6.97  | 9.4   |
| MORC4        | 10.45 | 9.46  | 10.38 | 10.78 | 10.73 | 9.76 | 11.63 | 10.17 |
| ITPRIPL2     | 9.76  | 9.57  | 10.08 | 9.76  | 11.39 | 9.76 | 10.11 | 10.81 |
| SLMAP        | 7.96  | 8.2   | 9.53  | 11.48 | 10.56 | 9.76 | 13.57 | 13.49 |
| LARP4        | 7.85  | 7.17  | 9.04  | 10.65 | 9.93  | 9.76 | 16.21 | 14.5  |
| TMEM120B     | 8.1   | 8.45  | 8.4   | 8.93  | 9.98  | 9.77 | 9.11  | 9.33  |
| TACC2        | 9.49  | 9.38  | 9.31  | 10.29 | 8.96  | 9.77 | 9.29  | 9.55  |
| CD47         | 9.65  | 8.39  | 9.98  | 11.27 | 9.93  | 9.77 | 13.99 | 11.94 |
| PLAT         | 20.64 | 20.64 | 18.92 | 17.32 | 10.18 | 9.78 | 9.69  | 9.65  |
| ALG1L        | 11.92 | 11.48 | 10.78 | 11.55 | 8.86  | 9.78 | 10.43 | 11.4  |
| C18orf32     | 11.2  | 9.35  | 7.15  | 10.62 | 9.8   | 9.79 | 11.14 | 8.06  |
| TMEM98       | 12.14 | 13.36 | 11.09 | 11.76 | 9.65  | 9.79 | 9.52  | 9.36  |
| MAP2K5       | 8.68  | 9.36  | 8.78  | 8.78  | 9.15  | 9.79 | 8.34  | 9.43  |
| KMT2D        | 9.16  | 9.19  | 9.05  | 9.37  | 9.22  | 9.79 | 9.26  | 10.01 |
| ABCD1        | 9.87  | 10.55 | 9.7   | 10.03 | 9.49  | 9.8  | 7.39  | 8.75  |
| METTL22      | 8.54  | 8.4   | 8.68  | 8.86  | 8.65  | 9.8  | 9.14  | 9.1   |
| RDH14        | 8.13  | 7.88  | 7.94  | 8.53  | 8.25  | 9.8  | 10.51 | 10.57 |
| TULP3        | 11.3  | 10.44 | 11.04 | 11.63 | 10.58 | 9.8  | 11.33 | 10.72 |
| KIF23        | 7.89  | 7.55  | 8.49  | 9.37  | 11.07 | 9.8  | 15.47 | 13.24 |
| HEATR6       | 8.49  | 8.79  | 8.64  | 8.16  | 9.31  | 9.81 | 9.94  | 9.39  |
| PARP3        | 8.87  | 9.46  | 9.55  | 9.96  | 9.36  | 9.81 | 9.23  | 10.02 |
| SNX33        | 10.3  | 10.24 | 9.83  | 9.92  | 9.53  | 9.81 | 8.45  | 10.16 |
| TOR1AIP2     | 8.94  | 8.64  | 9.52  | 11.56 | 10.01 | 9.81 | 13.02 | 13.04 |
| TMEM177      | 10.18 | 10.68 | 10.24 | 8.78  | 10.46 | 9.82 | 9.12  | 9.46  |
| LAMA3        | 10.15 | 9.08  | 10.26 | 11.24 | 10.09 | 9.82 | 12.33 | 10.06 |
| PLAA         | 8.1   | 7.64  | 8.18  | 9.64  | 10.6  | 9.82 | 12.26 | 11.7  |
| ERO1A        | 10.88 | 10.53 | 12.9  | 14.4  | 10.99 | 9.82 | 15.19 | 14.27 |
| MED17        | 8.83  | 8.33  | 9.75  | 9.82  | 10.41 | 9.83 | 10.73 | 10.01 |
| EXOSC9       | 10.76 | 9.61  | 10.68 | 10.58 | 11.22 | 9.83 | 12.69 | 11    |
| DNM1L        | 8.57  | 7.47  | 10.08 | 11.42 | 10.03 | 9.83 | 16.22 | 14.09 |
| ECE2         | 9.46  | 9.08  | 9.91  | 8.69  | 9.1   | 9.84 | 8.12  | 8.47  |

|           |       |       |       |       |       |       |       |       |
|-----------|-------|-------|-------|-------|-------|-------|-------|-------|
| RCBTB1    | 8.12  | 7.68  | 9.33  | 10.58 | 10.57 | 9.84  | 13.36 | 11.29 |
| HOXD10    | 9.25  | 7.88  | 10.18 | 12.09 | 10.18 | 9.84  | 14.03 | 14.84 |
| GOLGA8A   | 10.11 | 8.69  | 10.36 | 14.02 | 10.19 | 9.84  | 22.97 | 16.81 |
| P2RX4     | 12.06 | 11.75 | 10.45 | 11.11 | 10.8  | 9.85  | 7.4   | 9.63  |
| C12orf49  | 9.49  | 8.83  | 9.31  | 9.24  | 9.79  | 9.85  | 9.33  | 9.82  |
| EVA1C     | 11.17 | 9.47  | 10.12 | 9.25  | 10.58 | 9.85  | 11.02 | 10.04 |
| HEXDC     | 10.04 | 11.02 | 10.65 | 9.42  | 9.26  | 9.86  | 9.41  | 8.46  |
| SNX18     | 9.91  | 8.2   | 9.44  | 9.37  | 9.1   | 9.86  | 8.37  | 8.54  |
| SUSD6     | 10.08 | 9.55  | 10.29 | 10.26 | 10.13 | 9.86  | 10.45 | 10.2  |
| MBD4      | 9.49  | 10.67 | 10.33 | 11.52 | 10.06 | 9.86  | 15.03 | 14.87 |
| PPP1R15A  | 10.68 | 10.12 | 9.41  | 9.82  | 12.3  | 9.87  | 9.28  | 10.12 |
| CHD2      | 11.04 | 9.79  | 12.37 | 13.38 | 10.57 | 9.87  | 14.29 | 13.54 |
| SPHK2     | 8.66  | 8.81  | 8.02  | 7.47  | 10.03 | 9.88  | 7.94  | 8.9   |
| MRPS14    | 10.21 | 10.49 | 10.38 | 11.13 | 10.53 | 9.88  | 11.17 | 10.38 |
| C1GALT1C1 | 8.98  | 8.49  | 9.3   | 10.08 | 11.15 | 9.88  | 14.46 | 11.05 |
| QKI       | 11.32 | 10.33 | 12.09 | 14.12 | 9.66  | 9.88  | 14.35 | 12.04 |
| SEC23IP   | 9.21  | 9.47  | 10.53 | 10.99 | 11.08 | 9.88  | 14.34 | 12.46 |
| CASC4     | 7.91  | 7.38  | 9.15  | 10.78 | 8.86  | 9.88  | 14.37 | 13.39 |
| POLE      | 9.92  | 9.55  | 9.74  | 9.38  | 9.43  | 9.89  | 9.62  | 9.18  |
| RMDN3     | 9.57  | 9.69  | 10.12 | 10.02 | 10.49 | 9.89  | 10.29 | 9.97  |
| SNRNP35   | 10.53 | 11.66 | 11.18 | 13.17 | 10.21 | 9.89  | 9.36  | 10.14 |
| GPRIN1    | 8.42  | 8.27  | 8.21  | 7.26  | 8.99  | 9.9   | 7.06  | 8.58  |
| BANP      | 12.42 | 11.6  | 11.43 | 10.5  | 9.84  | 9.9   | 9.3   | 8.59  |
| CCL5      | 10.25 | 10.3  | 9.04  | 12.25 | 6.61  | 9.9   | 7.94  | 8.98  |
| MAST2     | 10.19 | 10.06 | 9.97  | 9.53  | 10.16 | 9.9   | 9.35  | 9.75  |
| PLEKHF2   | 9.76  | 8.39  | 9.87  | 11.03 | 10.38 | 9.9   | 15.63 | 11.62 |
| TGFBR3    | 10.41 | 9.94  | 12.38 | 13.57 | 10.55 | 9.9   | 12.27 | 12.31 |
| SCFD1     | 7.71  | 8.31  | 9.2   | 9.77  | 9.45  | 9.9   | 15.69 | 12.47 |
| IFITM2    | 15.81 | 19.6  | 15.94 | 16.48 | 9.37  | 9.91  | 9.15  | 8.46  |
| SPACA9    | 8.56  | 9.38  | 9.04  | 8.7   | 9.47  | 9.91  | 8.64  | 9.08  |
| FLI1      | 8.5   | 8.16  | 9.51  | 10.46 | 10.07 | 9.91  | 11.39 | 9.38  |
| CWF19L1   | 9.2   | 8.65  | 8.99  | 9.42  | 9.99  | 9.91  | 10.18 | 9.39  |
| MRPL46    | 10.99 | 9.2   | 10.52 | 9.75  | 10.99 | 9.91  | 11.65 | 11.2  |
| ZBTB17    | 11.14 | 12.55 | 10.72 | 10.5  | 10    | 9.92  | 8.73  | 9.27  |
| DSN1      | 9.86  | 8.26  | 10.72 | 11.85 | 12.41 | 9.92  | 14.77 | 11.59 |
| NME7      | 11.32 | 11.13 | 11.61 | 11.49 | 11.84 | 9.92  | 15.51 | 11.66 |
| DZIP1     | 8.28  | 8.23  | 9.38  | 10.15 | 10.21 | 9.92  | 13.41 | 12.21 |
| TMEM33    | 8.45  | 8.14  | 8.74  | 10.41 | 10.16 | 9.92  | 13.28 | 12.3  |
| CYB561    | 9.48  | 9.84  | 9.18  | 9.89  | 10.06 | 9.93  | 9.38  | 8.41  |
| KANSL3    | 9.57  | 9.75  | 9.78  | 9.7   | 9.92  | 9.93  | 9.86  | 9.81  |
| LMTK2     | 9.07  | 9     | 9.53  | 10.19 | 9.83  | 9.93  | 10.57 | 10.2  |
| PRKCI     | 7.69  | 6.92  | 9.14  | 11.61 | 9.69  | 9.93  | 16.1  | 13.27 |
| RASA1     | 8.09  | 7.96  | 10.38 | 12.44 | 9.42  | 9.93  | 17.15 | 15    |
| SPATA2L   | 10.61 | 9.9   | 10.99 | 8.92  | 9.29  | 9.94  | 7.7   | 7.77  |
| SETD6     | 8.89  | 8.45  | 8.44  | 9.22  | 9.8   | 9.94  | 11.04 | 9.52  |
| SDCCAG8   | 8.28  | 7.58  | 9.69  | 10.87 | 9.35  | 9.94  | 13.55 | 11.6  |
| SLC35F5   | 8.92  | 8.94  | 10.21 | 10.77 | 9.87  | 9.94  | 13.48 | 11.76 |
| FAM188A   | 8.4   | 9.2   | 10.12 | 10.68 | 9.48  | 9.94  | 13.11 | 13.1  |
| TWSG1     | 8.69  | 8.57  | 10.08 | 11.95 | 11.17 | 9.94  | 16.75 | 13.87 |
| HSCB      | 7.91  | 8.74  | 8.29  | 9.56  | 10.2  | 9.95  | 9     | 9.17  |
| TMEM199   | 9.2   | 8.95  | 8.93  | 9.04  | 9.96  | 9.95  | 10.2  | 9.42  |
| CNRIP1    | 9.6   | 9.97  | 10.45 | 10.8  | 9.94  | 9.95  | 9.54  | 10.88 |
| HPS4      | 9.28  | 9.49  | 9.12  | 10.35 | 9.93  | 9.95  | 11.71 | 11.19 |
| ZNF544    | 10.6  | 9.75  | 11    | 11.97 | 10.42 | 9.95  | 12.82 | 11.76 |
| HECTD1    | 9.04  | 7.51  | 10.07 | 12.28 | 10.59 | 9.95  | 16.05 | 14.33 |
| CAMK1     | 10.67 | 10.73 | 11.47 | 9.67  | 9.47  | 9.96  | 9.07  | 8.66  |
| SLC5A6    | 8.22  | 9.04  | 8.77  | 8.59  | 10.33 | 9.96  | 9.29  | 9.29  |
| ERICH1    | 10.32 | 9.76  | 10.65 | 11.23 | 11.77 | 9.96  | 13.09 | 12.35 |
| LIMS1     | 8.83  | 8.03  | 10.13 | 11.71 | 10.35 | 9.96  | 14.6  | 13    |
| CLDN12    | 8.95  | 8.41  | 10.48 | 12.08 | 11.35 | 9.96  | 17.62 | 14.47 |
| CEP170    | 9.75  | 8.44  | 11.12 | 13.39 | 10.25 | 9.96  | 17.28 | 15.54 |
| BIN1      | 10.86 | 11.55 | 10.81 | 9.42  | 9.42  | 9.97  | 7.1   | 8.32  |
| NPIPA8    | 10.1  | 7.94  | 9.69  | 11.74 | 7.99  | 9.97  | 14.27 | 11.05 |
| TRMU      | 9.4   | 7.19  | 8.36  | 8.33  | 10.07 | 9.98  | 9.78  | 9.38  |
| TSHZ1     | 10.81 | 10.24 | 10.12 | 11.35 | 9.84  | 9.98  | 10.02 | 10.45 |
| NVL       | 9.53  | 8.77  | 10.01 | 11.11 | 11.66 | 9.98  | 12.42 | 11.56 |
| NT5DC1    | 8.64  | 8.65  | 9.31  | 9.83  | 9.64  | 9.98  | 14.31 | 11.63 |
| KIAA0895L | 7.03  | 6.65  | 7.38  | 8.9   | 9.34  | 9.98  | 12.37 | 12.3  |
| AIMP1     | 8.98  | 8.33  | 10.1  | 10.48 | 9.96  | 9.98  | 14.86 | 13.78 |
| ADD3      | 11.12 | 10.16 | 12.37 | 13.95 | 10.52 | 9.98  | 16.34 | 14.1  |
| PIAS4     | 10.59 | 10.85 | 10.94 | 9.75  | 9.19  | 9.99  | 7.58  | 9.05  |
| POMT2     | 9.21  | 9.93  | 9.09  | 9.15  | 9.46  | 9.99  | 8.52  | 9.46  |
| MROH6     | 9.41  | 9.57  | 9.4   | 8.47  | 9.48  | 9.99  | 9.31  | 10.45 |
| MCCC1     | 9.61  | 10.15 | 10.92 | 12.18 | 10.79 | 9.99  | 12.45 | 11.83 |
| WFS1      | 9.98  | 10.98 | 9.27  | 9.8   | 8.98  | 10    | 7.72  | 8.84  |
| ZNF410    | 9.84  | 9.97  | 9.96  | 10.14 | 11.06 | 10    | 10.81 | 9.4   |
| GORASP1   | 10.08 | 10.68 | 10.35 | 10.91 | 9.26  | 10    | 8.12  | 9.7   |
| CRADD     | 9.48  | 8.33  | 9.57  | 9.66  | 10.37 | 10    | 10.85 | 9.97  |
| KANSL2    | 9.67  | 11.15 | 9.84  | 9.93  | 11.62 | 10    | 11.5  | 10.47 |
| SNRNP27   | 9.78  | 9.48  | 10.78 | 11.18 | 9.26  | 10    | 12.25 | 11.07 |
| NARS2     | 8.95  | 8.3   | 8.89  | 9.25  | 9.07  | 10    | 13.04 | 11.17 |
| GEMIN4    | 9.74  | 9.65  | 9.52  | 8.71  | 10.21 | 10.01 | 8.27  | 8.69  |
| PCDHB15   | 11.15 | 11.67 | 10.73 | 11.43 | 9.62  | 10.01 | 10.66 | 9.72  |
| FAM86B1   | 8.05  | 8.19  | 9.19  | 8.42  | 9.04  | 10.02 | 9.5   | 10.72 |
| C15orf39  | 10.8  | 11.33 | 10.32 | 9.89  | 9.9   | 10.03 | 8.11  | 9.6   |
| PIN4      | 8.29  | 8.32  | 9.5   | 11.12 | 9.31  | 10.03 | 10.43 | 11.32 |
| NDC1      | 8.76  | 7.82  | 10.01 | 9.86  | 11.51 | 10.03 | 14.27 | 11.65 |

|           |       |       |       |       |       |       |       |       |
|-----------|-------|-------|-------|-------|-------|-------|-------|-------|
| NPIPA1    | 10.07 | 9.58  | 10.96 | 10.69 | 9.73  | 10.03 | 11.55 | 12.35 |
| NFATC1    | 10.19 | 10.03 | 9.67  | 10.51 | 8.89  | 10.04 | 7.02  | 8.12  |
| LIME1     | 8.6   | 8.3   | 8.21  | 8.25  | 9.68  | 10.04 | 9.76  | 9.38  |
| FHL2      | 14.04 | 13.81 | 13.72 | 13.12 | 11.64 | 10.04 | 11.58 | 9.76  |
| SNX9      | 8.4   | 8.34  | 9.6   | 10.98 | 9.63  | 10.04 | 12.23 | 11.82 |
| KRT19     | 9.32  | 8.97  | 8.44  | 8.22  | 9.35  | 10.05 | 8.2   | 8.24  |
| MICB      | 8.4   | 9.02  | 8.29  | 8.42  | 9.59  | 10.05 | 9.64  | 9.26  |
| TSC22D3   | 10.03 | 11.12 | 9.85  | 10.23 | 9.42  | 10.05 | 8.53  | 12    |
| AHCTF1    | 8.7   | 7.59  | 10.12 | 12.15 | 10.23 | 10.05 | 17.68 | 15.36 |
| ANO10     | 9.43  | 10.94 | 9.78  | 9.21  | 10.63 | 10.06 | 10.19 | 9.62  |
| EXTL2     | 9.86  | 8.92  | 11.01 | 12.15 | 9.23  | 10.06 | 14.76 | 13.16 |
| RP9       | 12.16 | 12.38 | 12.97 | 13.5  | 12.38 | 10.06 | 11.74 | 13.3  |
| MKRN2     | 10.07 | 9.6   | 10.06 | 10.27 | 10.48 | 10.07 | 12.1  | 10.51 |
| KITLG     | 6.12  | 5.85  | 6.53  | 7.44  | 10.95 | 10.07 | 16.82 | 13.93 |
| PAQR7     | 8.13  | 8.06  | 8.93  | 8.49  | 8.83  | 10.08 | 8.13  | 9.57  |
| UBE2G1    | 9.11  | 8.97  | 8.92  | 9.31  | 9.14  | 10.08 | 11.08 | 9.63  |
| CLCC1     | 10.31 | 10.24 | 10.52 | 12.32 | 10.97 | 10.08 | 14.82 | 13.19 |
| POC1A     | 9.06  | 8.38  | 7.69  | 6.99  | 9.9   | 10.09 | 8.8   | 8.22  |
| PXDC1     | 11.14 | 11.28 | 11.6  | 10.29 | 10.27 | 10.09 | 9.22  | 9.65  |
| MRS2      | 8.76  | 7.92  | 8.52  | 9.77  | 9.92  | 10.09 | 11.41 | 9.76  |
| ABI2      | 9.62  | 9.4   | 11.36 | 10.76 | 10.02 | 10.09 | 13.19 | 11.67 |
| HPS3      | 8.98  | 8.18  | 10.05 | 11.73 | 9.62  | 10.09 | 15.13 | 12.93 |
| CEP95     | 8.58  | 8.16  | 10.67 | 11.41 | 10.99 | 10.09 | 16.63 | 13.68 |
| PCM1      | 8.19  | 7.49  | 10    | 12.56 | 10.42 | 10.09 | 19.5  | 15.75 |
| ABI1      | 9.7   | 8.61  | 9.43  | 11.93 | 10.5  | 10.1  | 14.91 | 12.38 |
| COG7      | 10.12 | 8.92  | 8.76  | 9.63  | 9.15  | 10.11 | 9.96  | 9.23  |
| PEX26     | 8.44  | 9.47  | 9.05  | 9.37  | 9.75  | 10.11 | 8.83  | 9.66  |
| SDHAF4    | 8.84  | 10.71 | 10.71 | 10.44 | 8.99  | 10.11 | 10.99 | 10.22 |
| PARP2     | 9.14  | 9.23  | 10.16 | 10.61 | 11.51 | 10.11 | 11.54 | 10.73 |
| COA7      | 8.41  | 8.27  | 9.04  | 10.45 | 10.29 | 10.11 | 12.81 | 11.81 |
| CHD6      | 10.44 | 9.63  | 11.29 | 13.27 | 9.84  | 10.11 | 13.57 | 12.43 |
| FUT11     | 12.33 | 12.24 | 12.98 | 11.88 | 9.69  | 10.12 | 9.91  | 8.72  |
| KIFAP3    | 10.84 | 9.45  | 10.97 | 11.03 | 10.05 | 10.12 | 12.15 | 10.09 |
| FASTKD5   | 8.68  | 8.65  | 8.88  | 8.72  | 10.19 | 10.12 | 11.66 | 10.37 |
| DNAJC17   | 9.52  | 9.63  | 10.76 | 8.65  | 8.85  | 10.13 | 8.51  | 7.3   |
| E4F1      | 10.37 | 9.16  | 10.14 | 9.01  | 9.57  | 10.13 | 8.24  | 7.87  |
| HDHD3     | 10.61 | 10.15 | 10.06 | 9.36  | 10.22 | 10.13 | 8.71  | 9.48  |
| SNUPN     | 10.49 | 10.4  | 8.73  | 10.19 | 12.95 | 10.13 | 9.87  | 10.49 |
| MBD2      | 11.12 | 8.82  | 11.21 | 10.79 | 10.37 | 10.13 | 10.35 | 10.75 |
| PIGF      | 11.56 | 11.01 | 10.54 | 12.31 | 12.38 | 10.13 | 17.07 | 14.29 |
| HR        | 11.91 | 11.47 | 11.45 | 10.73 | 10.7  | 10.14 | 8.69  | 9.6   |
| SARM1     | 9.47  | 9.44  | 9.17  | 8.9   | 8.94  | 10.15 | 8.01  | 8.76  |
| TADA2A    | 9.13  | 8.42  | 9.47  | 9.31  | 10.23 | 10.15 | 10.08 | 9.56  |
| KIZ       | 9.02  | 8.57  | 10.38 | 10.32 | 11.14 | 10.15 | 14.11 | 11.99 |
| MRPS25    | 9.28  | 9.13  | 8.86  | 10.1  | 10.28 | 10.15 | 14.31 | 12.47 |
| ARL1      | 10.17 | 8.81  | 9.65  | 11.54 | 10.6  | 10.15 | 13.93 | 12.66 |
| KIAA1161  | 9.63  | 10.75 | 9.52  | 9.8   | 8.94  | 10.16 | 9.01  | 10.03 |
| ANKS1A    | 10.24 | 10.04 | 9.76  | 9.5   | 10.22 | 10.16 | 9.43  | 10.56 |
| C17orf80  | 9.42  | 8.26  | 9.78  | 9.99  | 9.97  | 10.16 | 12.85 | 12.09 |
| TRIM24    | 9.52  | 9.02  | 10.57 | 12.09 | 10.95 | 10.16 | 14.29 | 12.47 |
| STARD10   | 9.36  | 9.15  | 8.53  | 7.38  | 9.95  | 10.17 | 7.81  | 8.49  |
| DIS3L2    | 9.94  | 8.96  | 9.14  | 9.01  | 9.71  | 10.17 | 8.74  | 8.7   |
| CNPY4     | 9.96  | 9.39  | 9.72  | 11.62 | 8.8   | 10.17 | 9.88  | 10.44 |
| SLC9A8    | 9.94  | 9.69  | 10.69 | 10.29 | 10.51 | 10.17 | 10.88 | 11.01 |
| MSH2      | 9.14  | 8.4   | 10.59 | 11.38 | 10.53 | 10.17 | 16.14 | 13.18 |
| SMARCA5   | 9.3   | 8.49  | 11.24 | 13.12 | 10.34 | 10.17 | 15.18 | 13.94 |
| GOLGB1    | 7.44  | 7.42  | 9.54  | 11.42 | 9.47  | 10.18 | 19.17 | 17.14 |
| POP1      | 8.57  | 8.47  | 9.59  | 9.28  | 10.15 | 10.19 | 10.03 | 10.45 |
| GAS8      | 8.98  | 9.09  | 9.4   | 9.15  | 9.28  | 10.2  | 9.71  | 9.58  |
| KMT5C     | 10.92 | 10.69 | 10.5  | 9.36  | 10.01 | 10.2  | 8.89  | 9.78  |
| ZNF346    | 10.57 | 9.86  | 10.77 | 11.34 | 10.78 | 10.2  | 10.15 | 9.88  |
| FAM57A    | 10.32 | 10.63 | 10.85 | 10.17 | 9.91  | 10.2  | 8.63  | 10.18 |
| KIDINS220 | 9.09  | 8.54  | 10.65 | 12.33 | 10.66 | 10.2  | 15.1  | 13.84 |
| COPS4     | 9.04  | 9.55  | 9.39  | 10.04 | 10.97 | 10.21 | 11.75 | 9.53  |
| FANCA     | 10.07 | 9.83  | 10.52 | 10    | 10.51 | 10.21 | 10.9  | 9.58  |
| ZSWIM1    | 11.23 | 9.62  | 11    | 9.37  | 10.25 | 10.21 | 10.25 | 11.11 |
| KDM4C     | 11.83 | 11.36 | 11.76 | 13.24 | 11.21 | 10.21 | 13.16 | 12.26 |
| CWC27     | 10.34 | 11.18 | 9.93  | 12.39 | 9.62  | 10.21 | 12.58 | 12.35 |
| ELN       | 18.72 | 19.19 | 17.33 | 16.5  | 9.73  | 10.22 | 7.88  | 8.49  |
| AARS2     | 8.85  | 9.09  | 9.2   | 8.58  | 9.31  | 10.22 | 8.46  | 8.58  |
| SOX13     | 12.17 | 12.07 | 11.65 | 10.79 | 9.28  | 10.22 | 8.9   | 10    |
| TRAF3     | 11.16 | 10.22 | 10.79 | 11.55 | 10.31 | 10.22 | 10.25 | 10.98 |
| MRPS31    | 8.97  | 9.13  | 10.33 | 10.45 | 11.41 | 10.22 | 13.56 | 12.06 |
| MITD1     | 10.09 | 8.64  | 10.48 | 11.5  | 11.49 | 10.23 | 14.37 | 11.51 |
| PREPL     | 8.8   | 8.29  | 9.99  | 11.75 | 10.08 | 10.23 | 16.02 | 13.58 |
| PQLC3     | 9.22  | 7.27  | 9.15  | 7.62  | 9.25  | 10.24 | 10.69 | 9.06  |
| PHAX      | 8.91  | 7.94  | 9.27  | 10.64 | 10.58 | 10.24 | 14.01 | 13    |
| PTPN18    | 9.55  | 9.31  | 9.74  | 9.61  | 9.51  | 10.25 | 8.26  | 8.58  |
| PCDHB14   | 12.21 | 12.85 | 12.08 | 13.6  | 9.91  | 10.25 | 10.65 | 10.76 |
| RILPL2    | 10.61 | 11.75 | 10.48 | 10.48 | 10.4  | 10.25 | 10.85 | 10.87 |
| GSK3B     | 8.43  | 8.44  | 9.49  | 10.91 | 10.37 | 10.25 | 12.53 | 11.7  |
| ZFAND2A   | 10.95 | 9.17  | 8.09  | 8.36  | 11.98 | 10.25 | 10.67 | 11.72 |
| ABCA1     | 6.57  | 7.02  | 7.26  | 9.37  | 9.4   | 10.25 | 14.92 | 13.94 |
| ADI1      | 10.78 | 11.79 | 10.02 | 10.27 | 11.57 | 10.26 | 8.81  | 8.64  |
| TXNDC15   | 12.23 | 11.49 | 11.28 | 11.64 | 10.86 | 10.26 | 10.69 | 11.23 |
| THUMPD3   | 10.13 | 9.59  | 11.19 | 11.93 | 11.13 | 10.26 | 15.6  | 13.13 |
| DHX29     | 8.08  | 7.46  | 8.82  | 10.87 | 9.79  | 10.26 | 14.87 | 13.73 |

|          |       |       |       |       |       |       |       |       |
|----------|-------|-------|-------|-------|-------|-------|-------|-------|
| ASH1L    | 9.72  | 8.8   | 11.03 | 13.67 | 11.07 | 10.26 | 15.84 | 14.48 |
| FAM208A  | 9.22  | 8.65  | 10.96 | 13.13 | 10.28 | 10.26 | 18.31 | 15.67 |
| SLC25A19 | 9.72  | 7.87  | 7.98  | 8.33  | 10.75 | 10.27 | 8.86  | 8.72  |
| PHF2     | 11.83 | 11.55 | 11.7  | 11.02 | 10.67 | 10.27 | 10.11 | 10.89 |
| DSP      | 10.14 | 9.46  | 11.23 | 11.78 | 10.75 | 10.27 | 12.62 | 11.85 |
| OGFOD3   | 10.73 | 10.67 | 10.86 | 10.13 | 9.85  | 10.28 | 7.82  | 9     |
| CDH4     | 12.06 | 12.67 | 11.28 | 11.61 | 10.35 | 10.28 | 8.67  | 9.85  |
| IFNAR1   | 8.65  | 7.97  | 9.29  | 10.47 | 10.51 | 10.28 | 13.32 | 11.14 |
| NCEH1    | 7.58  | 7.58  | 8.95  | 8.73  | 10.06 | 10.28 | 12.72 | 11.51 |
| PRMT3    | 6.61  | 7.04  | 8.22  | 8.69  | 9.78  | 10.28 | 14.64 | 11.87 |
| CCAR1    | 8.93  | 8.44  | 10.37 | 12.22 | 10.52 | 10.28 | 17.99 | 15.12 |
| ARHGAP17 | 10.47 | 10.94 | 10.95 | 11.58 | 11.25 | 10.3  | 9.49  | 10.34 |
| ARL6IP6  | 10.73 | 10.65 | 10.82 | 12.41 | 9.23  | 10.3  | 12.91 | 10.98 |
| OXSR1    | 8.94  | 8.83  | 10.16 | 10.68 | 10.85 | 10.3  | 13.85 | 11.83 |
| C6orf120 | 9.74  | 9.18  | 10.05 | 12.23 | 8.93  | 10.3  | 13.74 | 12.5  |
| TMEM41B  | 8.95  | 9.19  | 9.83  | 12.01 | 9.96  | 10.3  | 15.05 | 14.2  |
| BROX     | 8.34  | 7.99  | 8.86  | 11.32 | 9.98  | 10.3  | 18.83 | 15.21 |
| DENND1A  | 10.25 | 10.28 | 10.47 | 10.49 | 9.91  | 10.31 | 8.88  | 8.97  |
| ST3GAL1  | 9.63  | 10.23 | 10.11 | 10.87 | 10.87 | 10.31 | 10.72 | 10.75 |
| THADA    | 9.59  | 8.57  | 9.71  | 9.57  | 10.75 | 10.31 | 10.59 | 11.21 |
| CSNK1G3  | 7.79  | 7.88  | 8.99  | 10.55 | 9.36  | 10.31 | 14.96 | 13.31 |
| EML4     | 12.39 | 10.58 | 13.36 | 14.07 | 11.79 | 10.31 | 15.64 | 13.41 |
| NPRL2    | 10.45 | 10.92 | 8.78  | 9.46  | 10.42 | 10.33 | 10.33 | 10.29 |
| MEAF6    | 9.72  | 8.97  | 9.5   | 10.43 | 11.04 | 10.33 | 11.52 | 11.33 |
| PPIE     | 9.26  | 11.3  | 8.32  | 8.36  | 11    | 10.34 | 9.7   | 8.81  |
| ZNF133   | 9.47  | 9.01  | 9.35  | 10.4  | 9.46  | 10.34 | 11.91 | 11.13 |
| DCAF10   | 10.25 | 9.93  | 10.45 | 11.17 | 10.17 | 10.34 | 11.55 | 11.88 |
| TIA1     | 10.47 | 9.13  | 10.83 | 13.31 | 10.23 | 10.34 | 19.59 | 15.71 |
| KIF4A    | 10.46 | 9.02  | 9.35  | 10.02 | 11.2  | 10.35 | 11.78 | 10.02 |
| INPP5K   | 10.01 | 10.22 | 9.94  | 10.06 | 10.6  | 10.35 | 9.25  | 10.05 |
| NEIL2    | 9.52  | 9.92  | 10.62 | 10.25 | 11.1  | 10.35 | 10.86 | 10.61 |
| ACYP2    | 9.15  | 10.42 | 8.33  | 9.13  | 10.68 | 10.35 | 11.48 | 11.59 |
| NSD1     | 9.21  | 8.9   | 9.85  | 10.37 | 10.56 | 10.35 | 12.54 | 11.68 |
| DIEXF    | 8.89  | 8.09  | 10.3  | 10.12 | 10.5  | 10.35 | 13.7  | 12.09 |
| SMOX     | 11.13 | 11.56 | 11.82 | 10.5  | 10.29 | 10.36 | 8.01  | 9.07  |
| FBXO11   | 10.8  | 9.75  | 11.77 | 12.15 | 10.33 | 10.36 | 14.51 | 13.28 |
| CACTIN   | 9.46  | 10.31 | 9.38  | 8.97  | 9.35  | 10.37 | 7.83  | 8.84  |
| IFFO2    | 12.08 | 12.82 | 12.39 | 11.74 | 10.66 | 10.37 | 10.42 | 10.28 |
| SLC25A17 | 9.72  | 9.17  | 9.7   | 9.12  | 11.44 | 10.37 | 11.26 | 10.29 |
| HKR1     | 10.56 | 10.92 | 11.12 | 10.68 | 10.9  | 10.37 | 11.1  | 11.07 |
| VPS41    | 9.49  | 8.97  | 11.07 | 10.7  | 11.71 | 10.37 | 15.38 | 13.63 |
| PRKAA1   | 9.1   | 8.81  | 10.78 | 12.78 | 10.68 | 10.37 | 18.81 | 15.05 |
| ZNF408   | 10.73 | 10.13 | 9.58  | 8.91  | 8.88  | 10.38 | 6.74  | 7.42  |
| IFFO1    | 9.33  | 8.92  | 9.04  | 9.72  | 10.07 | 10.38 | 11.65 | 10.93 |
| TRIM33   | 8.36  | 7.95  | 11.04 | 11.87 | 9.5   | 10.38 | 13.71 | 12.65 |
| IQCB1    | 10.22 | 10.75 | 11.63 | 13.9  | 12.27 | 10.38 | 17.26 | 13.82 |
| ZNF777   | 10.75 | 11.7  | 11.06 | 10.96 | 8.77  | 10.39 | 7.77  | 8.62  |
| THTPA    | 10.01 | 9.6   | 10.3  | 9.18  | 10.75 | 10.4  | 9.53  | 10.67 |
| AP4B1    | 9.59  | 10.45 | 11.82 | 10.07 | 10.1  | 10.4  | 10.77 | 11.25 |
| SLC31A1  | 10.82 | 11.26 | 12.24 | 11.34 | 11.23 | 10.4  | 11.83 | 11.48 |
| ATP13A3  | 9.03  | 8.02  | 9.83  | 12.32 | 10.69 | 10.4  | 18.29 | 15.04 |
| MRM1     | 9.12  | 8.14  | 8.23  | 7.75  | 11.79 | 10.41 | 8.22  | 8.27  |
| C6orf47  | 9.1   | 9.83  | 10.57 | 9.53  | 9.43  | 10.41 | 9.36  | 8.81  |
| FOSL2    | 13.31 | 11.66 | 13.27 | 11.5  | 10.36 | 10.41 | 9.6   | 9.83  |
| RUNX1    | 11.92 | 10.53 | 11.9  | 12.46 | 10.31 | 10.41 | 10.81 | 11.2  |
| DUS2     | 10.07 | 10.01 | 9.1   | 9.55  | 10.88 | 10.42 | 9.77  | 9.89  |
| FAM92A1  | 7.9   | 8.24  | 9.68  | 8.92  | 9.97  | 10.42 | 12.57 | 11.12 |
| C1orf159 | 10.88 | 10.38 | 10.33 | 9.69  | 10.28 | 10.43 | 9.99  | 9.08  |
| CLP1     | 8.85  | 9.61  | 9.5   | 9.33  | 11.27 | 10.43 | 10.14 | 9.84  |
| MRPL39   | 9.59  | 8.57  | 9.63  | 9.24  | 11.96 | 10.43 | 14    | 12.07 |
| TXNRD2   | 12.46 | 12.15 | 11.63 | 10.89 | 10.21 | 10.44 | 8.77  | 9.22  |
| PSEN2    | 10.16 | 10.91 | 10.88 | 9.78  | 10.04 | 10.44 | 8.92  | 10.08 |
| IPO8     | 8.95  | 8.24  | 9.81  | 10.15 | 10.35 | 10.44 | 13.93 | 12.04 |
| MAPK7    | 11.86 | 12.87 | 11.55 | 10.83 | 10.49 | 10.45 | 8     | 9.64  |
| CDYL     | 11.39 | 10.24 | 10.97 | 11.02 | 10.31 | 10.45 | 11.75 | 10.69 |
| GATAD2B  | 10.27 | 11.45 | 11.11 | 11.1  | 10.31 | 10.45 | 10.8  | 11.98 |
| ORC3     | 9.39  | 8.78  | 10.61 | 9.61  | 10.6  | 10.45 | 14.17 | 12.14 |
| CNNM3    | 10.25 | 9.89  | 10.71 | 9.53  | 9.75  | 10.46 | 7.73  | 8.06  |
| IRAK2    | 12.52 | 12.15 | 12.45 | 12.37 | 11.01 | 10.46 | 10.34 | 10.63 |
| ZNF446   | 11.61 | 10.78 | 10.57 | 8.92  | 10.07 | 10.47 | 8.78  | 9.12  |
| FBXL5    | 9.81  | 8.65  | 9.87  | 9.33  | 10.6  | 10.47 | 12.08 | 10.75 |
| AAMDC    | 12.69 | 14.25 | 11.33 | 11.96 | 12.24 | 10.47 | 12.75 | 12.97 |
| AEN      | 9.09  | 8.6   | 8.44  | 8.5   | 11.84 | 10.48 | 10.95 | 9.52  |
| COG2     | 9.38  | 9.23  | 10.23 | 8.98  | 9.93  | 10.48 | 11.41 | 10.84 |
| TBC1D20  | 11.21 | 10.83 | 10.53 | 11.42 | 9.54  | 10.48 | 11.07 | 11.25 |
| MED9     | 10.05 | 10.19 | 9.55  | 9.18  | 10.79 | 10.49 | 9.39  | 9.9   |
| PPP2R2D  | 9.86  | 9.91  | 10    | 10.69 | 11.62 | 10.49 | 11.43 | 10.97 |
| SS18L2   | 9.32  | 10.47 | 9.7   | 10.16 | 8.85  | 10.49 | 10.97 | 11.09 |
| SMAP1    | 10.78 | 9.44  | 10.62 | 11.84 | 10.59 | 10.49 | 12.57 | 11.98 |
| TMEM189- |       |       |       |       |       |       |       |       |
| UBE2V1   | 16.32 | 9.98  | 12.09 | 13.74 | 10.4  | 10.5  | 8.86  | 5.76  |
| C9orf114 | 10.55 | 10.61 | 10.19 | 10.3  | 10.38 | 10.5  | 9.26  | 9.8   |
| STX18    | 9.55  | 9.81  | 11.97 | 10.16 | 11.8  | 10.5  | 11.27 | 11.48 |
| EIF4EBP2 | 10.85 | 10.96 | 11.63 | 11.5  | 10.36 | 10.5  | 11.61 | 11.59 |
| SEL1L    | 9.75  | 8.94  | 10.36 | 11.61 | 11.29 | 10.5  | 15.04 | 13.97 |
| NOL8     | 8.3   | 8.25  | 9.45  | 11.99 | 11.27 | 10.5  | 19.16 | 16.62 |
| CLPB     | 8.97  | 9.12  | 7.95  | 8.59  | 10.19 | 10.51 | 8.51  | 8.98  |

|          |       |       |       |       |       |       |       |       |
|----------|-------|-------|-------|-------|-------|-------|-------|-------|
| DMRTA1   | 10.14 | 9.56  | 11.04 | 12.35 | 10.6  | 10.51 | 14.6  | 12    |
| TSFM     | 9.89  | 9.49  | 8.83  | 8.18  | 11.06 | 10.52 | 9.58  | 9.44  |
| MAP3K12  | 9.75  | 11.15 | 10.36 | 10.71 | 9.8   | 10.52 | 10.33 | 11.5  |
| HS2ST1   | 10.05 | 8.98  | 11.81 | 13.8  | 12.09 | 10.52 | 14.4  | 13.91 |
| NSRP1    | 8.41  | 8.32  | 10.13 | 12.34 | 11.33 | 10.52 | 16.76 | 15.89 |
| BCAR3    | 10.3  | 9.92  | 10.18 | 9.98  | 10.61 | 10.53 | 9.32  | 10.11 |
| PHKA2    | 9.93  | 9.83  | 10.26 | 10.22 | 9.74  | 10.53 | 11.67 | 10.48 |
| NCAPH    | 11.26 | 9.38  | 9.23  | 9.9   | 11.03 | 10.53 | 10.8  | 10.54 |
| DXO      | 10    | 8.84  | 9.88  | 10.19 | 11.26 | 10.53 | 10.71 | 10.93 |
| SLC25A28 | 11.61 | 11.51 | 12.33 | 11.98 | 11.31 | 10.53 | 10.41 | 11.45 |
| FAM168A  | 11.12 | 11    | 11.62 | 11.54 | 11.08 | 10.53 | 11.52 | 11.48 |
| LRRC17   | 9.94  | 9.66  | 10.29 | 11.36 | 9.77  | 10.53 | 13.56 | 13.46 |
| RAPGEF1  | 11.09 | 10.34 | 10.43 | 10.47 | 10.39 | 10.54 | 9.31  | 10.12 |
| MBOAT2   | 7.71  | 9.88  | 9.32  | 10.89 | 10.23 | 10.54 | 13.36 | 12.24 |
| RHOT1    | 10.08 | 9.53  | 10.66 | 12.31 | 12.2  | 10.54 | 16.03 | 14.03 |
| ANKRD39  | 10.57 | 10.2  | 9.54  | 8.79  | 9.7   | 10.55 | 8.54  | 7.95  |
| OGFOD2   | 9.85  | 8.9   | 9.76  | 8.77  | 11.09 | 10.55 | 8.62  | 9.17  |
| C22orf39 | 11.96 | 9.69  | 10.43 | 10.3  | 10.28 | 10.55 | 10.32 | 9.86  |
| TMEM51   | 10.28 | 11.47 | 11.29 | 10.38 | 10.84 | 10.55 | 7.87  | 10.21 |
| VMAC     | 10.42 | 11.21 | 10.44 | 10.91 | 9.6   | 10.55 | 9.32  | 10.43 |
| ENDOD1   | 12.38 | 11.96 | 12.36 | 12.47 | 10.18 | 10.55 | 11.66 | 11.11 |
| PVRIG    | 7.62  | 7.96  | 8.38  | 9.48  | 10.69 | 10.55 | 13.17 | 11.94 |
| OSBPL3   | 9.29  | 9.02  | 10.21 | 11.21 | 12.06 | 10.55 | 16.2  | 13.95 |
| GPBP1    | 10.75 | 10.55 | 12.43 | 14.46 | 12.64 | 10.56 | 18.61 | 16.29 |
| CEBPD    | 12.27 | 12.33 | 12.4  | 10.72 | 8.94  | 10.57 | 7.98  | 8.45  |
| NPHP4    | 9.98  | 9.82  | 9.84  | 9.61  | 9.63  | 10.57 | 9.09  | 9.07  |
| PDGFC    | 10.81 | 10.54 | 11.56 | 14.12 | 12.12 | 10.57 | 13.87 | 12.87 |
| BLZF1    | 10.39 | 9.76  | 11.66 | 12.26 | 11.02 | 10.57 | 17    | 13.64 |
| AGGF1    | 9.67  | 9.41  | 10.93 | 13.54 | 11.41 | 10.57 | 16.07 | 14.77 |
| ELL      | 9.81  | 10.67 | 10.3  | 9.15  | 9.48  | 10.58 | 8.2   | 9.12  |
| PIGX     | 10.34 | 9     | 10.41 | 10.82 | 11.02 | 10.58 | 14.48 | 11.95 |
| TNKS2    | 10.16 | 9.35  | 10.97 | 12.68 | 10.93 | 10.58 | 15.88 | 14.43 |
| DHRS7B   | 10.14 | 10.33 | 9.39  | 9.48  | 9.96  | 10.59 | 8.42  | 9.88  |
| DNAJC1   | 10.7  | 10.96 | 11.54 | 11.35 | 10.89 | 10.59 | 10.41 | 10.03 |
| ZNF185   | 11.97 | 11.27 | 11.6  | 10.68 | 11.72 | 10.59 | 10.8  | 10.25 |
| BTF3L4   | 9.81  | 9.92  | 10.49 | 10.91 | 11.72 | 10.59 | 13.81 | 11.7  |
| ERP44    | 10.03 | 10.25 | 12.18 | 11.9  | 10.47 | 10.59 | 13.92 | 11.7  |
| ATF7     | 11.48 | 9.02  | 9.85  | 10.96 | 10.4  | 10.59 | 11.19 | 12.29 |
| MEX3C    | 10    | 9.5   | 11.74 | 12.13 | 10.55 | 10.59 | 13.37 | 12.59 |
| MSMP     | 8.32  | 8.53  | 6.14  | 9.54  | 7.12  | 10.6  | 4.79  | 7.01  |
| KDM4B    | 11.94 | 12.26 | 11.61 | 11.18 | 10.01 | 10.6  | 8.76  | 9.51  |
| TFPI2    | 13.05 | 12.88 | 12.87 | 12.58 | 9.67  | 10.6  | 11.81 | 9.85  |
| RHBDL1   | 5.01  | 4.48  | 4.69  | 5.42  | 10.27 | 10.6  | 11.19 | 10.22 |
| OTULIN   | 9.58  | 9.2   | 10.24 | 11.32 | 10.52 | 10.6  | 12.93 | 11.66 |
| TERF1    | 10.08 | 11.22 | 11.84 | 12.43 | 11.45 | 10.6  | 15.71 | 14.18 |
| CENPW    | 8.72  | 8.66  | 7.74  | 8.55  | 10.06 | 10.61 | 9.92  | 8.35  |
| DPH1     | 10.07 | 10.83 | 10.05 | 9.2   | 11.39 | 10.61 | 8.99  | 11.16 |
| CSRP2    | 15.18 | 12.65 | 13.3  | 13.32 | 11.37 | 10.62 | 11.91 | 11.43 |
| ALG2     | 10    | 9.73  | 9.75  | 10.23 | 11.03 | 10.63 | 11.81 | 11.15 |
| KYNU     | 10.14 | 8.5   | 10.84 | 10.03 | 11.08 | 10.63 | 15.61 | 12.21 |
| GOLGA5   | 11.01 | 9.34  | 11.25 | 12.71 | 11.78 | 10.63 | 15.6  | 14.2  |
| SMPD2    | 11.52 | 12.15 | 11.03 | 9.39  | 12.22 | 10.64 | 9.3   | 9.77  |
| DYNC1I1  | 10.3  | 11.24 | 11.52 | 12.06 | 10.99 | 10.64 | 12.23 | 12    |
| ZNF638   | 9.14  | 8.95  | 11.36 | 12.92 | 10.16 | 10.64 | 17.37 | 14.97 |
| PLEKHO1  | 11.41 | 12.92 | 11.55 | 11.13 | 10.13 | 10.65 | 9.38  | 10.75 |
| CEP41    | 10.71 | 10.3  | 10.93 | 11.62 | 10.67 | 10.65 | 13.33 | 11.79 |
| BST2     | 28.98 | 30.39 | 28.97 | 29.55 | 8.99  | 10.66 | 9.19  | 7.29  |
| TGIF2    | 10.61 | 10.94 | 11.24 | 10.96 | 10.5  | 10.66 | 11.15 | 11.23 |
| FBXW2    | 9.14  | 8.89  | 10.48 | 11.08 | 11.28 | 10.66 | 13.52 | 12.57 |
| B3GNTL1  | 8.54  | 8.94  | 7.62  | 8.6   | 10.01 | 10.67 | 9.04  | 8.58  |
| TMEM150A | 11.7  | 11.41 | 10.74 | 9.86  | 11.21 | 10.67 | 10.27 | 10.92 |
| TMEM263  | 9.43  | 8.69  | 11.05 | 13.96 | 10.7  | 10.67 | 16.34 | 14.98 |
| RECQL    | 9.36  | 8.68  | 9.72  | 11.68 | 10.66 | 10.67 | 18.83 | 15.04 |
| SERTAD2  | 10.6  | 10.62 | 11.21 | 11.77 | 11.35 | 10.68 | 13.69 | 12.73 |
| NUCB2    | 11.86 | 9.89  | 11.3  | 11.91 | 11.18 | 10.68 | 16.12 | 14.29 |
| METTL1   | 9.69  | 11.41 | 10.28 | 9.47  | 11.88 | 10.69 | 9.41  | 9.14  |
| SLC26A11 | 10.33 | 11.18 | 10.53 | 9.94  | 10.02 | 10.69 | 9.07  | 10.06 |
| SOX7     | 12.38 | 12.45 | 12.94 | 12.05 | 10.79 | 10.69 | 11.06 | 10.99 |
| C10orf2  | 7.86  | 9.18  | 8.73  | 8.45  | 11.42 | 10.69 | 10.35 | 11.09 |
| GATC     | 10.71 | 10.78 | 10.71 | 10.44 | 11.59 | 10.69 | 12    | 12.03 |
| AKTIP    | 10.8  | 10.91 | 11.85 | 12.06 | 12.33 | 10.69 | 14.5  | 14.01 |
| SSX2IP   | 10.48 | 9.74  | 11.79 | 13.58 | 10.97 | 10.69 | 17.53 | 15.18 |
| SH2B2    | 12.02 | 11.77 | 11.37 | 10.63 | 10.15 | 10.7  | 6.69  | 8.49  |
| GMEB2    | 9.73  | 10.75 | 10.38 | 9.77  | 11.17 | 10.7  | 7.95  | 9.96  |
| PCGF3    | 9.8   | 9.62  | 10.56 | 11.72 | 10.71 | 10.7  | 12.05 | 11.91 |
| PHF14    | 9.53  | 8.75  | 10.65 | 12.62 | 11.68 | 10.7  | 16.01 | 14.65 |
| GPATCH3  | 9.18  | 10.25 | 9.79  | 8.44  | 9.95  | 10.71 | 8.75  | 8.92  |
| NAGPA    | 8.47  | 8.21  | 8.94  | 7.94  | 10.36 | 10.71 | 8.19  | 9.05  |
| USP4     | 10.95 | 10.94 | 10.94 | 11.61 | 11.79 | 10.71 | 11.86 | 10.95 |
| ANKRD52  | 10.42 | 10.52 | 10.88 | 11.29 | 10.84 | 10.71 | 10.94 | 11.31 |
| TP53INP1 | 7.38  | 7.2   | 8.33  | 9.34  | 11.03 | 10.71 | 15.34 | 14.72 |
| SULF1    | 8.96  | 9.48  | 10.06 | 10.54 | 11.27 | 10.72 | 12.97 | 11.85 |
| KLHL7    | 10.71 | 9.65  | 9.78  | 10.8  | 11.11 | 10.72 | 12.37 | 12.09 |
| CAMK2N2  | 7.23  | 7.16  | 6.62  | 5.35  | 9.83  | 10.74 | 6.61  | 7.37  |
| SUPV3L1  | 9.54  | 8.99  | 10.13 | 9.64  | 12.1  | 10.74 | 12.98 | 10.55 |
| CYB561D2 | 10.27 | 11.3  | 10.4  | 9.2   | 11.64 | 10.74 | 9.73  | 10.62 |



|              |       |       |       |       |       |       |       |       |
|--------------|-------|-------|-------|-------|-------|-------|-------|-------|
| DDX55        | 8.71  | 8.46  | 10.17 | 9.79  | 11.48 | 10.74 | 12.91 | 11.1  |
| HERPUD2      | 11.17 | 10.86 | 11.46 | 11.84 | 11.15 | 10.74 | 12.78 | 11.57 |
| TREX1        | 13.37 | 13.4  | 12.99 | 11.67 | 10.86 | 10.75 | 9.71  | 9.78  |
| FAM127C      | 13.23 | 12.67 | 12.56 | 12.5  | 11.19 | 10.75 | 9.1   | 10.13 |
| RNF14        | 10.13 | 9.01  | 10.2  | 10.18 | 11.08 | 10.75 | 12.51 | 12.52 |
| DPY19L1      | 9.81  | 8.82  | 10.63 | 11.56 | 11.09 | 10.75 | 15.5  | 12.85 |
| RB1CC1       | 9.28  | 9.03  | 9.68  | 10.36 | 10.55 | 10.75 | 16.16 | 15.16 |
| TPRN         | 8.58  | 9.7   | 8.04  | 8.04  | 9.09  | 10.76 | 7.2   | 6.46  |
| ADO          | 10.14 | 9.49  | 10.46 | 10.94 | 11.39 | 10.77 | 12.48 | 11.36 |
| LOC105371303 | 9.09  | 8.82  | 8.99  | 10.66 | 10.14 | 10.77 | 10.39 | 11.93 |
| GDF11        | 8.11  | 9.32  | 8.96  | 7.85  | 9.71  | 10.78 | 7.49  | 8.51  |
| AMBRA1       | 11.44 | 11.53 | 11.75 | 10.96 | 11.03 | 10.78 | 9.02  | 9.77  |
| ATG7         | 10.31 | 10.36 | 9.91  | 9.82  | 10.4  | 10.78 | 10.82 | 10.93 |
| DES12        | 10.1  | 8.98  | 10.99 | 11    | 11.03 | 10.78 | 14.46 | 13.01 |
| ATF7IP       | 10.05 | 10.48 | 12.95 | 13.62 | 10.81 | 10.78 | 15.18 | 14.98 |
| SRSF8        | 10.15 | 9.36  | 9.74  | 9.96  | 10.91 | 10.79 | 12.05 | 10.43 |
| CBS          | 14.75 | 11.71 | 9.32  | 10.02 | 12.86 | 10.79 | 10.88 | 11.34 |
| CAMSAP2      | 9.45  | 8.82  | 11.08 | 13.59 | 11.21 | 10.79 | 17.92 | 15.81 |
| PPIG         | 11.41 | 10.96 | 11.96 | 13.7  | 12.1  | 10.79 | 18.94 | 18.38 |
| ABCB8        | 9.24  | 9.53  | 9.21  | 8.28  | 9.96  | 10.8  | 8.69  | 8.81  |
| RASSF4       | 11.41 | 11.2  | 11.3  | 12.04 | 11.74 | 10.8  | 13.32 | 12.67 |
| ANKIB1       | 8.83  | 8.52  | 11.42 | 13.29 | 11.19 | 10.8  | 17.88 | 15.29 |
| BAZ1A        | 10.26 | 9.06  | 11.12 | 13.56 | 10.88 | 10.8  | 19.2  | 16.54 |
| SNAPC3       | 9.54  | 9.78  | 11.68 | 11.86 | 10.62 | 10.81 | 15.28 | 14.46 |
| ABHD14A      | 9.32  | 11.66 | 9.39  | 7.67  | 10.57 | 10.82 | 7.89  | 8.19  |
| C6orf136     | 9.21  | 8.94  | 9.96  | 8.84  | 9.84  | 10.82 | 10.53 | 10.42 |
| CXorf56      | 11.84 | 10.14 | 11.1  | 11.17 | 12.69 | 10.82 | 11.64 | 11.7  |
| C5orf24      | 8.83  | 8.81  | 11.38 | 13.45 | 10.35 | 10.82 | 18.68 | 15.37 |
| TMCO6        | 8.66  | 10.02 | 9.66  | 10.56 | 12.16 | 10.83 | 10.97 | 9.17  |
| BRI3BP       | 12.25 | 10.94 | 12.61 | 12.25 | 9.38  | 10.83 | 8.99  | 9.85  |
| HIPK1        | 10.66 | 10.97 | 11.71 | 12.35 | 10.88 | 10.83 | 13.71 | 13.45 |
| ZC3H4        | 10.96 | 11.22 | 10.58 | 9.89  | 10.59 | 10.84 | 9.44  | 9.26  |
| UAP1         | 9.75  | 9.61  | 11.4  | 11.81 | 11.38 | 10.84 | 14.24 | 12.05 |
| CBR4         | 9.97  | 9.84  | 9.31  | 10.84 | 11.77 | 10.84 | 14.34 | 12.31 |
| NSL1         | 10.69 | 9.97  | 10.68 | 11.24 | 10.97 | 10.84 | 12.03 | 12.68 |
| MTRNR2L8     | 8.73  | 9.84  | 9.09  | 8.48  | 9.45  | 10.85 | 9.02  | 11.99 |
| MED1         | 9.77  | 9.27  | 10.77 | 12    | 11.39 | 10.85 | 14.19 | 12.79 |
| C11orf54     | 9.17  | 7.85  | 10.3  | 10.77 | 11.83 | 10.85 | 16.61 | 14.11 |
| CCNF         | 9.05  | 9.27  | 8.95  | 7.26  | 11.53 | 10.86 | 9.55  | 9.98  |
| ANAPC1       | 9.7   | 9.05  | 9.91  | 10.03 | 10.89 | 10.86 | 13.11 | 12.06 |
| ZDHHC6       | 9.62  | 8.96  | 10.14 | 10.76 | 10.43 | 10.87 | 14.94 | 13.76 |
| SKAP2        | 9.66  | 8.68  | 10.75 | 13.2  | 10.86 | 10.87 | 16.54 | 14.76 |
| ULK3         | 10.02 | 9.53  | 9.58  | 9.22  | 10.37 | 10.88 | 10.75 | 9.46  |
| CCDC22       | 11.45 | 12.01 | 10.6  | 10.31 | 11.45 | 10.88 | 10.8  | 10.09 |
| TAF11        | 8.02  | 7.93  | 8.71  | 9.32  | 8.97  | 10.88 | 11.63 | 11.15 |
| APIP         | 7.88  | 7.18  | 7.8   | 10.57 | 11.58 | 10.88 | 14.65 | 11.91 |
| SLC11A2      | 11.17 | 11.29 | 12.5  | 12.22 | 12.1  | 10.88 | 13.92 | 13.34 |
| TMEM158      | 14.26 | 12.48 | 12.87 | 11.95 | 9.94  | 10.89 | 8.01  | 6.9   |
| SIX5         | 11.84 | 11.16 | 11.16 | 10.48 | 9.97  | 10.89 | 7.9   | 8.49  |
| NIF3L1       | 10.14 | 9.29  | 10.28 | 11.46 | 9.92  | 10.89 | 12.62 | 11.24 |
| MTURN        | 9.06  | 8.17  | 8.86  | 8.9   | 12.62 | 10.89 | 13.26 | 13.13 |
| VPS26A       | 9.11  | 9.9   | 10.31 | 11.7  | 11.28 | 10.89 | 16.23 | 14.32 |
| SCD5         | 11.03 | 11.24 | 12.1  | 13.31 | 11.41 | 10.89 | 15.82 | 15.27 |
| SLC27A3      | 16.79 | 15.96 | 15.22 | 13.19 | 10.28 | 10.9  | 8.43  | 8.62  |
| TINF2        | 10.66 | 11.02 | 10.78 | 11.27 | 10.44 | 10.9  | 10.82 | 10.51 |
| RANBP10      | 11    | 10.86 | 10.79 | 10.27 | 10.71 | 10.91 | 10.66 | 11.69 |
| TTC7B        | 10.65 | 11.7  | 11.23 | 10.97 | 12.86 | 10.91 | 11.54 | 12.4  |
| RNF208       | 12.08 | 11.91 | 11.23 | 10.36 | 11.09 | 10.92 | 9.45  | 9.64  |
| POLG         | 10.65 | 10.62 | 10.21 | 9.67  | 10.89 | 10.92 | 9.96  | 10.5  |
| ACAA2        | 12.04 | 12.23 | 11.65 | 11.93 | 10.93 | 10.92 | 11.52 | 10.58 |
| NUP88        | 10.65 | 10.03 | 11.62 | 10.87 | 12.25 | 10.92 | 13.28 | 11.86 |
| MRPS36       | 10.6  | 9.83  | 10.13 | 10.65 | 14.64 | 10.92 | 14.39 | 12.94 |
| POLR3K       | 10.97 | 8.93  | 9.71  | 9.25  | 9.02  | 10.94 | 9.33  | 9.51  |
| CCDC28B      | 11.67 | 12.66 | 12.06 | 11.73 | 10.52 | 10.94 | 9.41  | 9.53  |
| TTC27        | 10.06 | 8.83  | 10.12 | 10.19 | 11.45 | 10.94 | 13.03 | 12.18 |
| SPC25        | 9.65  | 7.33  | 10.19 | 9.42  | 10.36 | 10.94 | 15.92 | 13.96 |
| OSTM1        | 10.43 | 10.9  | 11.08 | 12.53 | 11.29 | 10.94 | 15.64 | 14.26 |
| ZNF697       | 10.89 | 9.42  | 11.19 | 11.54 | 11.29 | 10.95 | 12.43 | 11.63 |
| MERTK        | 9.42  | 8.73  | 9.7   | 10.9  | 11.93 | 10.95 | 13.73 | 12.18 |
| RBM14        | 11.83 | 11.92 | 12.05 | 11.17 | 10.45 | 10.96 | 8.91  | 9.56  |
| PISD         | 9.84  | 10.17 | 10.36 | 10.27 | 11.84 | 10.96 | 10.74 | 10.56 |
| SNX11        | 11.19 | 12.74 | 10.39 | 10.92 | 11.48 | 10.96 | 10.33 | 10.86 |
| CUL4A        | 9.64  | 9.32  | 9.96  | 10.88 | 10.81 | 10.96 | 13.52 | 11.74 |
| ST3GAL5      | 9.46  | 10.36 | 10.96 | 10.46 | 11.51 | 10.96 | 11.74 | 11.84 |
| SLIT3        | 9.41  | 9.39  | 8.64  | 9.3   | 10.31 | 10.97 | 10    | 10.14 |
| CHPT1        | 10.49 | 10.15 | 11.06 | 11.82 | 10.32 | 10.97 | 11.43 | 11.03 |
| EXOSC2       | 10.78 | 10.78 | 10.98 | 11.37 | 10.97 | 10.97 | 11.38 | 11.26 |
| RSRC2        | 11.33 | 11.95 | 12.55 | 13.59 | 11.8  | 10.97 | 15.75 | 15.61 |
| FAM219B      | 11.3  | 9.85  | 9.12  | 8.97  | 9.97  | 10.98 | 9.77  | 9.38  |
| RAB31        | 9.48  | 9.55  | 10.14 | 10.14 | 10.69 | 10.98 | 12.56 | 11.38 |
| ZNF76        | 9.88  | 9.31  | 9.02  | 8.9   | 10.57 | 10.99 | 8.96  | 9.76  |
| HIST1H1C     | 13.4  | 13.07 | 11.76 | 12.79 | 10.9  | 10.99 | 6.94  | 10.97 |
| TMEM175      | 9.25  | 10.89 | 10.97 | 11.06 | 10.88 | 10.99 | 10.87 | 11.33 |
| GTF2B        | 10.57 | 11.2  | 10.76 | 12    | 11.46 | 10.99 | 15.15 | 13.15 |
| ZNF688       | 11.73 | 11.83 | 10.06 | 10.54 | 10.81 | 11    | 9.73  | 9.94  |
| TOR2A        | 12.36 | 13.59 | 10.31 | 10.57 | 13.02 | 11    | 8.84  | 10.21 |
| GPATCH4      | 9.01  | 9.83  | 11.36 | 10.24 | 10.13 | 11    | 13.02 | 11.49 |

|              |       |       |       |       |       |       |       |       |
|--------------|-------|-------|-------|-------|-------|-------|-------|-------|
| ST3GAL3      | 11.07 | 12.03 | 10.53 | 9.76  | 11.61 | 11.01 | 10.05 | 10.2  |
| IRF2         | 11.12 | 11.3  | 11.74 | 11.96 | 11.1  | 11.01 | 14.27 | 10.95 |
| TOR1AIP1     | 10.1  | 8.91  | 11.04 | 11.64 | 11.4  | 11.01 | 15.25 | 13.59 |
| ERGIC2       | 10.55 | 11.69 | 10.7  | 10.82 | 11.66 | 11.01 | 16.02 | 13.79 |
| ECT2         | 9.18  | 9.1   | 9.47  | 11.08 | 11.84 | 11.01 | 20.4  | 15.56 |
| SYNE2        | 10.02 | 9.14  | 12.17 | 14.6  | 11.29 | 11.01 | 19.16 | 17.09 |
| VPS11        | 9.72  | 11.17 | 9.59  | 10.13 | 10.61 | 11.02 | 9.83  | 9.38  |
| BBS1         | 11.32 | 11.37 | 10.65 | 11.49 | 11.99 | 11.02 | 11.34 | 11.64 |
| PDF          | 10.65 | 10.18 | 9.36  | 7.86  | 9.91  | 11.03 | 10.01 | 9.48  |
| MYH10        | 11.05 | 10.23 | 11.51 | 11.96 | 11.22 | 11.03 | 12.06 | 12.05 |
| USP16        | 9.07  | 9.76  | 9.57  | 10.22 | 10.33 | 11.03 | 15.63 | 14.3  |
| RDX          | 9.82  | 9.08  | 11.39 | 13.97 | 10.96 | 11.03 | 17.3  | 16.33 |
| PPP3CA       | 10.55 | 9.47  | 10.99 | 13.01 | 11.59 | 11.04 | 13.47 | 12.24 |
| DCAF4        | 8.82  | 8.89  | 9.14  | 9.43  | 10.8  | 11.05 | 11.55 | 10.38 |
| ARFGEF2      | 8.81  | 7.89  | 9.58  | 10.92 | 11.71 | 11.05 | 16.75 | 14.27 |
| ICE1         | 9.89  | 8.42  | 10.91 | 12.59 | 10.4  | 11.05 | 16.71 | 14.68 |
| CBX2         | 12.77 | 12.6  | 11.98 | 11.86 | 12.07 | 11.06 | 9.11  | 9.39  |
| HSPA1A       | 12.52 | 14.7  | 10.04 | 11.86 | 9.68  | 11.06 | 7.41  | 10    |
| ACVR1B       | 11.71 | 11.74 | 11.18 | 12.11 | 11.25 | 11.06 | 11.06 | 10.18 |
| NUMBL        | 11.49 | 11.35 | 10.35 | 10.43 | 10.64 | 11.06 | 9.02  | 10.82 |
| C10orf76     | 10.16 | 10.1  | 10.25 | 9.81  | 10.71 | 11.06 | 11.76 | 11.42 |
| RFC5         | 11.88 | 12.45 | 11.53 | 12.36 | 13.18 | 11.06 | 12.78 | 12.41 |
| PPP2R5E      | 10.31 | 9.95  | 11.82 | 11.27 | 10.92 | 11.06 | 13.41 | 12.73 |
| CBWD2        | 9.34  | 8.74  | 11.27 | 10.73 | 12.24 | 11.06 | 17.76 | 15.73 |
| ADCK5        | 11    | 10.4  | 10.96 | 9.65  | 9.28  | 11.07 | 8.68  | 9.19  |
| PGP          | 8.59  | 9.34  | 8.47  | 7.8   | 9.83  | 11.08 | 8.85  | 8.8   |
| PIP5K1C      | 10.95 | 11.39 | 10.32 | 10.72 | 9.68  | 11.08 | 8.45  | 9.54  |
| ENO2         | 19.49 | 18.1  | 17.68 | 17    | 10.78 | 11.08 | 12.91 | 11.61 |
| TCF19        | 10.58 | 10.49 | 10.81 | 10.28 | 10.76 | 11.09 | 10.82 | 9.37  |
| UPP1         | 12.56 | 11.96 | 12.15 | 11.08 | 10.94 | 11.09 | 10.97 | 10.75 |
| PATL1        | 10.89 | 11.69 | 12.83 | 12.12 | 11.09 | 11.09 | 13.35 | 13.38 |
| MFN1         | 8.82  | 8.6   | 10.83 | 12.24 | 11.55 | 11.09 | 16.61 | 14.32 |
| UBXN11       | 11.17 | 11.79 | 9.43  | 10.16 | 12.16 | 11.1  | 10.23 | 10.52 |
| POLR3C       | 12.86 | 13.49 | 11.38 | 13.11 | 9.92  | 11.1  | 10.77 | 10.55 |
| KNSTRN       | 7.59  | 9.03  | 8.58  | 8.4   | 11.25 | 11.1  | 12.96 | 11.23 |
| RNASEH1      | 9.65  | 10.17 | 10.57 | 10.1  | 11.98 | 11.1  | 11.67 | 11.93 |
| PLXNA3       | 11.07 | 11.55 | 10.65 | 11.91 | 10.45 | 11.11 | 10.53 | 10.88 |
| CACNB3       | 12.4  | 12.49 | 12.28 | 10.91 | 10.27 | 11.11 | 11.16 | 10.98 |
| TXNRD1       | 10.05 | 9.76  | 10.84 | 11.29 | 11.96 | 11.11 | 13.86 | 12.88 |
| TRIM37       | 10.05 | 9.8   | 11.89 | 12.11 | 11.52 | 11.11 | 14.44 | 13.27 |
| THBS3        | 11.05 | 11.85 | 9.93  | 11.25 | 10.84 | 11.12 | 11.29 | 10.65 |
| RNASEH2B     | 9.62  | 10.27 | 11.8  | 11.37 | 12.22 | 11.12 | 13.04 | 12.47 |
| ARHGEF12     | 9.86  | 9.36  | 11.42 | 12.81 | 10.85 | 11.12 | 14.51 | 13.2  |
| GPATCH8      | 11.4  | 11.39 | 12.7  | 13.34 | 12.15 | 11.12 | 13.79 | 13.28 |
| CASP9        | 11.2  | 10.44 | 10.68 | 9.9   | 10.32 | 11.13 | 10.12 | 8.47  |
| STPG1        | 8.21  | 8.55  | 8.72  | 7.71  | 10.32 | 11.13 | 10.39 | 10.66 |
| GPN1         | 12.81 | 12    | 11.84 | 12.22 | 11.85 | 11.13 | 12.39 | 11.65 |
| SOGA1        | 9.87  | 10.18 | 10.11 | 10.11 | 11.3  | 11.13 | 10.75 | 11.84 |
| POLG2        | 8.31  | 8.45  | 9.82  | 10.5  | 11.5  | 11.13 | 15.43 | 13.25 |
| AGFG2        | 12.01 | 12.71 | 12.42 | 11.26 | 12.23 | 11.14 | 10.43 | 10.8  |
| INTS4        | 10.19 | 8.89  | 9.3   | 9.61  | 10.28 | 11.14 | 11.75 | 10.93 |
| ECD          | 10.65 | 10.77 | 12.44 | 11.03 | 12.08 | 11.14 | 14.59 | 12.37 |
| TOPBP1       | 9.68  | 7.94  | 11.01 | 12.02 | 11.82 | 11.14 | 17.49 | 14.25 |
| HAUS8        | 10.59 | 11.57 | 11.26 | 10.03 | 11.52 | 11.15 | 10.58 | 10.06 |
| ILKAP        | 11.42 | 12.83 | 11.71 | 10.49 | 12.82 | 11.15 | 12.58 | 10.75 |
| LOC105375355 | 10.06 | 10.94 | 11.78 | 12.44 | 11.55 | 11.15 | 12.86 | 11.94 |
| PPIL2        | 11.55 | 11.16 | 10.42 | 10.68 | 12.52 | 11.15 | 11.68 | 12.26 |
| MELK         | 11.37 | 9.77  | 12.77 | 11.55 | 12.2  | 11.15 | 14.5  | 12.46 |
| INAFM1       | 9.88  | 10.3  | 10.96 | 9.62  | 8.01  | 11.16 | 6.06  | 7.22  |
| NAT6         | 10.24 | 10.85 | 8.63  | 9.49  | 9.59  | 11.16 | 8.38  | 9.34  |
| LOC100996720 | 14.96 | 13.97 | 15.83 | 14.41 | 12.17 | 11.16 | 10.15 | 9.77  |
| CHAF1B       | 12.33 | 14.15 | 11.92 | 11.46 | 11.53 | 11.16 | 11.12 | 10.08 |
| CDKN2C       | 13.52 | 12.47 | 12.58 | 11.7  | 10.67 | 11.16 | 9.13  | 10.39 |
| C18orf8      | 9.09  | 9.72  | 9.64  | 10.02 | 10.14 | 11.17 | 11.9  | 11.9  |
| GGPS1        | 10.35 | 8.92  | 11.33 | 12.42 | 10.89 | 11.17 | 14.96 | 13.93 |
| FAR1         | 9.62  | 8.63  | 10.44 | 12.96 | 10.94 | 11.17 | 20.45 | 17.02 |
| TMC7         | 8.75  | 9.61  | 9.3   | 10.13 | 11.25 | 11.18 | 12.54 | 11.29 |
| AFAP1L2      | 10.27 | 10.16 | 11.01 | 10.72 | 11.22 | 11.18 | 11.21 | 12.5  |
| KCTD9        | 10.18 | 8.89  | 10.92 | 12.59 | 12.63 | 11.18 | 16.39 | 14.96 |
| DOLPP1       | 10.37 | 10.98 | 10.64 | 10.5  | 10.45 | 11.19 | 8.88  | 9.9   |
| NDOR1        | 10.48 | 10.1  | 9.4   | 10.19 | 10.46 | 11.19 | 9.78  | 10.49 |
| PHF20        | 10.94 | 9.75  | 12.06 | 12.93 | 11.76 | 11.19 | 13.99 | 13.5  |
| SPC24        | 10.83 | 10.66 | 10.87 | 11.86 | 10.92 | 11.2  | 11.08 | 10.24 |
| PIK3IP1      | 9.98  | 10.59 | 9.28  | 10.71 | 10.66 | 11.2  | 9.68  | 10.47 |
| FAM220A      | 12.34 | 10.91 | 12.31 | 12.13 | 11.3  | 11.2  | 12.38 | 11.76 |
| KYAT1        | 9.7   | 10.44 | 10.25 | 9.09  | 11.82 | 11.2  | 11.51 | 12.15 |
| VPS37A       | 10.63 | 10.2  | 10.85 | 12.18 | 11.2  | 11.2  | 12.95 | 12.31 |
| POGZ         | 11.72 | 11.51 | 12.28 | 13.36 | 11.6  | 11.2  | 13.73 | 13.19 |
| COMMD9       | 10.74 | 10.18 | 9.78  | 9.09  | 12.75 | 11.21 | 12.16 | 10.74 |
| ZDHHC18      | 12.27 | 12.35 | 13.1  | 11.89 | 11.88 | 11.21 | 10.38 | 10.82 |
| FADS2        | 10.47 | 12.84 | 10.7  | 10.46 | 11.27 | 11.21 | 9.8   | 11.53 |
| GTF2H1       | 10.54 | 9.28  | 10.3  | 10.78 | 12.31 | 11.21 | 15.92 | 13.82 |
| RANBP2       | 8.66  | 8.52  | 11.83 | 13.8  | 10.99 | 11.21 | 19.74 | 17.05 |
| OPLAH        | 11.02 | 10.85 | 10.95 | 9.75  | 9.46  | 11.22 | 8.32  | 9.17  |
| WDR81        | 9.75  | 10.42 | 10.44 | 9.23  | 9.49  | 11.22 | 8.94  | 9.62  |

|              |       |       |       |       |       |       |       |       |
|--------------|-------|-------|-------|-------|-------|-------|-------|-------|
| ACTR3B       | 9.77  | 8.95  | 9.58  | 9.76  | 12.79 | 11.22 | 10.89 | 10.49 |
| AKAP8        | 10.06 | 9.53  | 9.54  | 10.85 | 11.07 | 11.22 | 11.84 | 11.45 |
| HOXD9        | 8.42  | 8.1   | 9.1   | 10.78 | 9.57  | 11.22 | 11.24 | 12.06 |
| INTS9        | 11.37 | 11.24 | 10.88 | 10.67 | 12.09 | 11.22 | 11.21 | 12.15 |
| NUP153       | 11.15 | 10.72 | 12.19 | 12.32 | 11.16 | 11.22 | 14.12 | 12.77 |
| SKA2         | 10.25 | 9.03  | 10.52 | 12.1  | 11.07 | 11.22 | 17.8  | 13.96 |
| HSPA4L       | 8.32  | 7.97  | 10.21 | 10.86 | 10.86 | 11.22 | 18.34 | 14.33 |
| LOC101929479 | 11.08 | 11.98 | 10.21 | 13.54 | 11.81 | 11.23 | 11.23 | 11.84 |
| TTC31        | 12.24 | 12.72 | 11.58 | 12.07 | 12.56 | 11.23 | 13.42 | 13.34 |
| ZC3H15       | 9.71  | 10.58 | 10.17 | 10.98 | 11.37 | 11.23 | 13.23 | 13.69 |
| ESF1         | 10.16 | 11.43 | 10.87 | 11.84 | 12.1  | 11.23 | 15.37 | 15.26 |
| VPS33A       | 9.8   | 10.5  | 10.04 | 9.05  | 10.79 | 11.24 | 11.7  | 10.38 |
| SH3KBP1      | 11.6  | 11.76 | 12.29 | 12.95 | 11.54 | 11.24 | 11.81 | 11.02 |
| HTT          | 10.65 | 11.07 | 10.6  | 10.42 | 10.97 | 11.24 | 10.63 | 11.13 |
| TYW1         | 11.1  | 10.33 | 10.36 | 11.03 | 11.88 | 11.24 | 12.7  | 12.3  |
| TOM1         | 10.68 | 10.81 | 11.13 | 9.3   | 9.8   | 11.25 | 8.92  | 9.63  |
| PINX1        | 9.91  | 10.3  | 8.84  | 8.17  | 11.14 | 11.26 | 10.29 | 10.84 |
| PPT2         | 11.04 | 11.02 | 11.24 | 10.97 | 11.04 | 11.26 | 10.98 | 11.6  |
| RRN3         | 9.95  | 9.29  | 11.56 | 11.4  | 12.25 | 11.26 | 15.13 | 12.92 |
| CDC42SE2     | 10.15 | 10.31 | 11.54 | 11.99 | 11.34 | 11.27 | 14.85 | 13.58 |
| CUL3         | 10.74 | 9.62  | 10.45 | 12.28 | 12.45 | 11.27 | 15.64 | 14.99 |
| TMEM159      | 10.07 | 10.75 | 10.62 | 10.91 | 11.41 | 11.28 | 10.08 | 9.99  |
| IQSEC2       | 11.41 | 12.39 | 10.29 | 11.75 | 11.93 | 11.28 | 10.05 | 11.01 |
| RUNDC1       | 12.59 | 12.05 | 11.99 | 12.27 | 11.97 | 11.29 | 11.03 | 11.7  |
| STX8         | 11.07 | 11.13 | 11.94 | 10.9  | 11.86 | 11.29 | 12.08 | 12.66 |
| CCNDBP1      | 10.84 | 9.56  | 10.39 | 10.62 | 12.35 | 11.3  | 14.18 | 12.08 |
| STX12        | 10.78 | 10.91 | 10.84 | 10.77 | 12.41 | 11.3  | 14.04 | 12.99 |
| FAM45A       | 8.84  | 8.97  | 10.2  | 11.21 | 11.63 | 11.3  | 16.28 | 14.35 |
| TAF9B        | 10.52 | 9.13  | 10.82 | 11.6  | 11.64 | 11.31 | 16.22 | 12.91 |
| KRR1         | 9.01  | 9.1   | 9.8   | 9.56  | 11.3  | 11.31 | 17.5  | 14.51 |
| KCTD3        | 11.4  | 10.81 | 13.12 | 14.05 | 12.26 | 11.31 | 18.03 | 14.94 |
| GPT2         | 12.77 | 12.34 | 11.97 | 11.49 | 11.77 | 11.32 | 9.69  | 10.53 |
| POLR3A       | 10.68 | 11.01 | 11.2  | 10.62 | 11.37 | 11.32 | 11.8  | 11.01 |
| FAM214B      | 10.86 | 11.11 | 10.16 | 11.66 | 10.64 | 11.32 | 10.26 | 11.66 |
| GNB4         | 9.08  | 8.71  | 10.88 | 13.89 | 11.39 | 11.32 | 15.93 | 13.71 |
| PFAS         | 9.51  | 10.1  | 9.37  | 9.65  | 10.7  | 11.33 | 9.89  | 10.16 |
| SLC15A4      | 11.27 | 10.74 | 12.21 | 11.67 | 11.08 | 11.33 | 11.98 | 10.38 |
| MMGT1        | 10    | 9.97  | 10.29 | 11.46 | 10.74 | 11.33 | 14.9  | 12.02 |
| GTF2H2C      | 10.91 | 8.75  | 10.4  | 13.33 | 12.45 | 11.33 | 18.28 | 16.13 |
| RAB40B       | 10.37 | 9.57  | 9.22  | 9.93  | 10.65 | 11.34 | 11.19 | 11.02 |
| C14orf80     | 12.14 | 11.26 | 11.23 | 9.47  | 10.93 | 11.35 | 8.5   | 8.51  |
| CDC16        | 10.08 | 10.69 | 12.28 | 12.4  | 13.74 | 11.35 | 15.6  | 14.53 |
| HLTF         | 10.01 | 10.17 | 11.96 | 13.68 | 12.6  | 11.35 | 19.76 | 17.04 |
| LRCH3        | 10.32 | 10.68 | 11.06 | 11.02 | 9.94  | 11.37 | 10.63 | 10.83 |
| RNF25        | 12.25 | 11.31 | 11.92 | 11.7  | 11.16 | 11.37 | 10.06 | 11.14 |
| MECOM        | 11.25 | 10.2  | 13.84 | 15.44 | 11.64 | 11.37 | 16.94 | 15.64 |
| RASSF1       | 7.96  | 9.4   | 8.23  | 7.69  | 10.13 | 11.38 | 8.91  | 8.76  |
| MTHFR        | 11.81 | 12.05 | 11.36 | 11.31 | 10.76 | 11.38 | 8.84  | 10.89 |
| TNS2         | 13.65 | 12.84 | 13.18 | 13.16 | 10.41 | 11.38 | 9.83  | 10.98 |
| STK11IP      | 11.83 | 12.36 | 10.66 | 10.39 | 12.12 | 11.39 | 10    | 9.52  |
| TATDN2       | 11.11 | 10.72 | 10.74 | 11.16 | 10.9  | 11.39 | 10.75 | 10.84 |
| TMEM126B     | 10.01 | 10.77 | 11    | 11.72 | 12.59 | 11.39 | 18.02 | 15.15 |
| SLC30A9      | 11    | 11.42 | 12.1  | 13.71 | 13    | 11.39 | 18.6  | 15.63 |
| YTHDC1       | 11.78 | 10.48 | 12.92 | 14.51 | 12.73 | 11.39 | 16.69 | 15.94 |
| NUP107       | 9.93  | 8.97  | 10.96 | 13.32 | 12    | 11.39 | 18.81 | 16.03 |
| SPSB1        | 12.24 | 13.08 | 12.19 | 11.71 | 11.56 | 11.4  | 11.21 | 10.31 |
| SYNPO        | 13.89 | 14.44 | 13.29 | 13.16 | 12.04 | 11.4  | 10.84 | 10.6  |
| TNFAIP8L1    | 9.43  | 10.55 | 8.85  | 9.44  | 10.75 | 11.4  | 10.14 | 11.05 |
| CYB5D2       | 10.64 | 11.69 | 11.17 | 12.39 | 11.19 | 11.4  | 9.61  | 11.48 |
| CCNB2        | 10.15 | 10.22 | 10.73 | 10.06 | 11.74 | 11.4  | 12.39 | 12.06 |
| CNOT2        | 10.24 | 10.27 | 11.09 | 11.35 | 11.66 | 11.4  | 13.77 | 12.66 |
| HSPA13       | 12.36 | 11.04 | 11.87 | 13.8  | 13.37 | 11.4  | 19.99 | 15.91 |
| ATF5         | 15.08 | 14.38 | 15.22 | 14.94 | 11.46 | 11.41 | 9     | 10.4  |
| ENY2         | 10.79 | 11.82 | 11.29 | 12.99 | 12.2  | 11.41 | 14.39 | 12.61 |
| PLA2G15      | 11.43 | 12.16 | 10.97 | 11.24 | 11.01 | 11.42 | 10.52 | 10.69 |
| RNF149       | 9.98  | 9.72  | 10.07 | 10.82 | 11.37 | 11.42 | 12.56 | 11.97 |
| CNOT10       | 10.65 | 10.83 | 11.25 | 11.71 | 12.81 | 11.42 | 15.25 | 12.41 |
| GEMIN6       | 9.99  | 8.85  | 8.49  | 9.78  | 10.39 | 11.43 | 11.13 | 12.63 |
| IFT140       | 12.32 | 11.36 | 11.61 | 11.12 | 10.17 | 11.44 | 9.32  | 10.79 |
| RNF34        | 11.2  | 11.18 | 11.88 | 12.13 | 12.03 | 11.44 | 11.75 | 11.77 |
| FAM114A1     | 12.6  | 13.11 | 13.46 | 14.32 | 11.96 | 11.44 | 14.17 | 12.89 |
| GPANK1       | 10.85 | 12.55 | 11.06 | 10.01 | 11.99 | 11.45 | 9.64  | 9.83  |
| SGCE         | 12.99 | 12.85 | 15.08 | 14.57 | 11.72 | 11.45 | 16.93 | 14.55 |
| ABCD3        | 10.88 | 11.2  | 13.28 | 14.2  | 14.09 | 11.45 | 18.9  | 16.69 |
| GOLGA3       | 11.4  | 12    | 12.32 | 12.04 | 12.43 | 11.46 | 12.29 | 12.81 |
| RIC1         | 10.03 | 9.31  | 11.87 | 12.81 | 11.76 | 11.46 | 15.46 | 13.51 |
| CYBRD1       | 11.75 | 11.16 | 13.01 | 13.98 | 12.05 | 11.46 | 15.85 | 14.49 |
| RBM4B        | 10.59 | 10.39 | 12.55 | 11.33 | 12.49 | 11.47 | 12.87 | 11.51 |
| PLD2         | 10.99 | 11.21 | 10.9  | 11.47 | 11.8  | 11.47 | 10.91 | 11.83 |
| CCDC92       | 11.88 | 12.95 | 13.2  | 13.02 | 9.25  | 11.48 | 9.18  | 10.79 |
| CDC6         | 14.3  | 12.49 | 13.88 | 14.39 | 12.97 | 11.48 | 13.37 | 12.18 |
| SCHIP1       | 10.08 | 9.91  | 11.29 | 13.53 | 11.13 | 11.48 | 13.98 | 14    |
| CEP55        | 8.55  | 7.51  | 9.18  | 9.95  | 11.19 | 11.48 | 16.63 | 14.08 |
| FAM107B      | 10.91 | 10.23 | 11.89 | 12.6  | 13.35 | 11.48 | 15.99 | 14.26 |

|           |       |       |       |       |       |       |       |       |
|-----------|-------|-------|-------|-------|-------|-------|-------|-------|
| RRP8      | 12.24 | 11.76 | 11.84 | 11.17 | 12.01 | 11.49 | 10.42 | 9.04  |
| SNTA1     | 11.51 | 13.04 | 12.4  | 10.17 | 10.45 | 11.49 | 7.78  | 9.07  |
| ZNF865    | 11.88 | 10.77 | 11.54 | 11.08 | 11.19 | 11.49 | 9.43  | 10.26 |
| PCID2     | 9.13  | 10.01 | 10.12 | 10.5  | 11.29 | 11.49 | 12.34 | 10.66 |
| KLHDC10   | 12.1  | 11.63 | 11.3  | 12.59 | 12.86 | 11.49 | 13.95 | 12.99 |
| STAU2     | 11.87 | 11.07 | 12.86 | 13.59 | 12.04 | 11.49 | 16.68 | 14.29 |
| NAB2      | 12.99 | 13.55 | 13.22 | 11.99 | 11.13 | 11.5  | 10.04 | 9.95  |
| CCDC159   | 10.77 | 10.31 | 9.42  | 10.15 | 12.09 | 11.5  | 10.4  | 11.18 |
| APPL2     | 11.28 | 10.68 | 11.02 | 10.81 | 13.03 | 11.51 | 14.01 | 13.31 |
| COPS7B    | 12.94 | 13.4  | 12.63 | 13.4  | 11.96 | 11.52 | 12.5  | 11.66 |
| ANKHD1    | 12.25 | 11.59 | 12.13 | 12.36 | 13.95 | 11.52 | 14.8  | 12.18 |
| GFPT1     | 11.12 | 11.27 | 12.18 | 13.01 | 12.04 | 11.52 | 15.4  | 13.61 |
| MFS6      | 10.89 | 10.04 | 11.75 | 12.98 | 12.99 | 11.52 | 14.97 | 14    |
| RCOR3     | 10.81 | 10.13 | 12.56 | 14.01 | 12.45 | 11.52 | 15.71 | 15.38 |
| POLA2     | 13.61 | 13.97 | 13.01 | 11.99 | 12.73 | 11.53 | 12.35 | 12.04 |
| ING5      | 9.51  | 10.02 | 10.07 | 10.37 | 12.02 | 11.53 | 13.26 | 12.25 |
| PDI5      | 11.93 | 14.2  | 11.92 | 12.69 | 12.14 | 11.53 | 14.02 | 13.26 |
| ADAM10    | 11.01 | 10.27 | 13.19 | 15.47 | 12.27 | 11.53 | 20.09 | 17.32 |
| ANKRD54   | 11.65 | 10.31 | 10.5  | 11.45 | 10.52 | 11.54 | 9.53  | 10.21 |
| OAS1      | 33.92 | 36.47 | 35.7  | 35.42 | 11.07 | 11.54 | 11.22 | 10.35 |
| SCAF4     | 11.89 | 12.67 | 12.33 | 12.45 | 10.96 | 11.55 | 12.72 | 12.31 |
| C12orf45  | 9.69  | 8.71  | 10.03 | 10.07 | 12.28 | 11.55 | 10.82 | 12.43 |
| ZNF775    | 12.67 | 12.57 | 12.72 | 11.88 | 10.09 | 11.56 | 8.17  | 8.74  |
| NOM1      | 9.3   | 9.42  | 10.18 | 10.86 | 11.26 | 11.56 | 12.72 | 11.51 |
| MTRNR2L2  | 12.28 | 11.82 | 11.75 | 13.31 | 12.82 | 11.56 | 13.66 | 13.24 |
| ARNT      | 11.67 | 11.99 | 12.17 | 12.41 | 12.03 | 11.57 | 13.28 | 12.79 |
| PPID      | 10.55 | 9.71  | 10.54 | 13.07 | 13.13 | 11.57 | 14.43 | 13.33 |
| USP1      | 11.26 | 11.43 | 11.21 | 12.92 | 12.3  | 11.57 | 16.16 | 14.64 |
| RAB43     | 14.01 | 13.81 | 13.03 | 12.85 | 8.58  | 11.58 | 7.43  | 8.69  |
| OAF       | 8.76  | 9.59  | 8.49  | 8.09  | 11.23 | 11.58 | 8.4   | 9.55  |
| TNKS      | 11.51 | 10.8  | 12.31 | 12.83 | 11.62 | 11.58 | 14.42 | 13.52 |
| SECISBP2  | 10.64 | 9.24  | 11.4  | 11.92 | 12.01 | 11.58 | 14.77 | 13.8  |
| UBLCP1    | 9.44  | 8.5   | 10.85 | 13.08 | 11.51 | 11.58 | 19.82 | 17.35 |
| POT1      | 10.75 | 12.02 | 10.7  | 12.78 | 10.18 | 11.6  | 16.38 | 12.99 |
| RAB12     | 9.27  | 8.83  | 9.27  | 9.72  | 11.07 | 11.61 | 12.17 | 10.95 |
| KPNA1     | 10.42 | 9.37  | 10.44 | 10.2  | 10.97 | 11.61 | 14.41 | 12.27 |
| LRRRC37A3 | 11.27 | 10.4  | 12.14 | 13.18 | 11.58 | 11.61 | 15.86 | 14.26 |
| ANKS6     | 10.69 | 10.74 | 10.56 | 10.73 | 12.38 | 11.62 | 12.07 | 10.85 |
| CUL9      | 12.19 | 11.49 | 12.18 | 11.1  | 12.01 | 11.62 | 11.08 | 11.45 |
| PGAM2     | 7.96  | 8.19  | 9.21  | 11.78 | 10.97 | 11.62 | 14.94 | 11.87 |
| LRRFIP2   | 9.19  | 8.04  | 11.07 | 11.05 | 13.85 | 11.62 | 15.07 | 13.65 |
| WDR12     | 10.14 | 9.13  | 9.55  | 10.85 | 13.23 | 11.62 | 14.88 | 13.82 |
| F2RL1     | 12.81 | 11.09 | 12.78 | 13.04 | 12.58 | 11.63 | 15.4  | 12.61 |
| SPRY4     | 11.78 | 12.71 | 12.39 | 12.8  | 11.2  | 11.64 | 11.34 | 12.31 |
| RBBP6     | 11.83 | 11.07 | 12.67 | 13.34 | 10.31 | 11.64 | 13.05 | 12.85 |
| PTGES     | 25.78 | 23.67 | 22.78 | 21.48 | 10.77 | 11.66 | 9.08  | 10.53 |
| TMEM206   | 11.42 | 11.05 | 10.17 | 12.1  | 12.3  | 11.66 | 12.09 | 11.91 |
| ANKRD27   | 10.39 | 10.43 | 10.35 | 12.15 | 12.18 | 11.66 | 12.37 | 12.72 |
| DDHD2     | 10.84 | 10.28 | 11.39 | 12.02 | 12.48 | 11.66 | 14.42 | 14.4  |
| CENPF     | 8.14  | 7.45  | 10.24 | 11.12 | 11.14 | 11.66 | 19.03 | 17.27 |
| CORO1A    | 15.38 | 15.52 | 14.71 | 12.99 | 12.86 | 11.67 | 8.74  | 11.26 |
| MRPL54    | 11.21 | 12.69 | 10.82 | 9.64  | 11.74 | 11.68 | 7.73  | 9.74  |
| NLN       | 10.41 | 9.33  | 11.72 | 12.59 | 12.35 | 11.68 | 16.39 | 14.57 |
| SSR1      | 11.1  | 11.2  | 12.52 | 13.86 | 13.01 | 11.68 | 17.69 | 15.51 |
| DOLK      | 11.38 | 11.99 | 11.35 | 11.13 | 12.81 | 11.69 | 8.63  | 10.94 |
| MAN2C1    | 13.12 | 12.95 | 12.32 | 11.09 | 11.07 | 11.69 | 11.18 | 11.28 |
| FAM193B   | 11.15 | 10.75 | 11.46 | 11.42 | 12.06 | 11.69 | 12.63 | 12.49 |
| RBMS1     | 11.31 | 10.36 | 12.29 | 14.9  | 11.99 | 11.69 | 17.55 | 16.02 |
| CPSF6     | 12.28 | 11.23 | 12.36 | 13.42 | 12.56 | 11.7  | 14.94 | 14.03 |
| RBM17     | 11.39 | 11.63 | 11.97 | 13.11 | 11.72 | 11.71 | 14.39 | 12.94 |
| ABHD15    | 10.74 | 10.26 | 10.15 | 10.34 | 11.2  | 11.72 | 8.89  | 10.07 |
| HIRA      | 11.4  | 11.29 | 11.14 | 11.58 | 11.75 | 11.72 | 10.86 | 11.36 |
| SMG1      | 10.49 | 9.75  | 12.52 | 14.4  | 11.77 | 11.72 | 19.71 | 17.15 |
| KMT2E     | 11.89 | 11.33 | 13.86 | 17.96 | 12.09 | 11.72 | 18.36 | 18.33 |
| LMAN2L    | 12.27 | 12.97 | 12.15 | 11.98 | 11.75 | 11.73 | 11.76 | 11.79 |
| PLPP6     | 10.31 | 9.98  | 10.87 | 10.82 | 12.13 | 11.73 | 11.99 | 12.15 |
| RFC1      | 10.42 | 9.08  | 12.09 | 13.75 | 12.4  | 11.73 | 17.55 | 15.44 |
| TONSL     | 12.19 | 11.32 | 12.32 | 11.61 | 11.67 | 11.74 | 10.3  | 9.97  |
| OLFML2A   | 14.94 | 15.48 | 14.69 | 15.44 | 12.27 | 11.74 | 10.3  | 11.6  |
| GPD1L     | 9.66  | 9.57  | 10.56 | 10.71 | 12.28 | 11.74 | 13.99 | 13.63 |
| SNX8      | 10.87 | 10.33 | 11    | 9.92  | 10.36 | 11.75 | 8.71  | 9.31  |
| PNP       | 9.81  | 9.98  | 10.08 | 9.56  | 12.28 | 11.75 | 11.95 | 11.09 |
| MTSS1     | 14.11 | 14.92 | 15.28 | 16.07 | 10.53 | 11.76 | 12.18 | 13.88 |
| GFM1      | 9.93  | 9.46  | 11.94 | 13.01 | 13.33 | 11.76 | 16.16 | 14.84 |
| GFOD2     | 11.59 | 11.24 | 11.54 | 11.11 | 12.02 | 11.77 | 10.74 | 11.04 |
| BAG1      | 10.35 | 10.75 | 10.32 | 8.94  | 12.69 | 11.77 | 11.04 | 11.62 |
| GBE1      | 11.95 | 11.44 | 12.43 | 13.02 | 11.98 | 11.78 | 14.11 | 11.37 |
| CNOT6     | 9.58  | 8.76  | 11.07 | 12.54 | 11.99 | 11.78 | 16.01 | 14.62 |
| SGSM2     | 10.98 | 11.48 | 11.67 | 11.27 | 12.09 | 11.8  | 11.54 | 11.33 |
| EDC3      | 13.27 | 14.02 | 13.38 | 12.82 | 12.53 | 11.8  | 12.33 | 11.96 |
| TAF1C     | 10.49 | 10.46 | 9.94  | 10.04 | 11.66 | 11.8  | 11.99 | 13.29 |
| FOPNL     | 10.61 | 9.25  | 10.83 | 12.1  | 13.24 | 11.8  | 18.55 | 14.18 |
| MICU2     | 10.91 | 10.02 | 11.13 | 12.4  | 12.47 | 11.8  | 18.21 | 15.87 |
| TP53INP2  | 11.53 | 12.2  | 11.81 | 12.43 | 11.75 | 11.81 | 10.64 | 12.1  |
| GMPBB     | 11.18 | 10.99 | 10.94 | 10.17 | 10.36 | 11.82 | 8.22  | 8.86  |
| HSBP1L1   | 13.04 | 12.73 | 11.28 | 13.95 | 13.27 | 11.82 | 14.33 | 12.89 |
| SOAT1     | 11.16 | 10.85 | 11.91 | 12.67 | 12.03 | 11.83 | 15.85 | 13    |

|              |       |       |       |       |       |       |       |       |
|--------------|-------|-------|-------|-------|-------|-------|-------|-------|
| TBC1D8       | 11.44 | 11.61 | 12.5  | 12.57 | 11.79 | 11.83 | 13.63 | 13.49 |
| KDM3A        | 18.56 | 16.27 | 18.32 | 19.99 | 11.4  | 11.83 | 16.42 | 14.63 |
| ARVCF        | 10.35 | 10.39 | 10.34 | 9.93  | 11.08 | 11.84 | 10.04 | 10.35 |
| SRRD         | 9.55  | 9.09  | 9.2   | 8.95  | 11.33 | 11.84 | 10.97 | 10.73 |
| TMEM92       | 12.84 | 14.01 | 15.05 | 11.77 | 11.18 | 11.84 | 8.8   | 10.85 |
| ERCC2        | 12.75 | 10.76 | 11.19 | 11.1  | 11.82 | 11.84 | 10.41 | 11.46 |
| EID2         | 9.98  | 9.39  | 11.36 | 10.28 | 11.62 | 11.85 | 10.73 | 10.57 |
| TNFRSF21     | 13.03 | 13.42 | 13.05 | 13.14 | 10.66 | 11.85 | 10.14 | 11.01 |
| SLC35E3      | 10.71 | 9.46  | 10.8  | 10.51 | 11.87 | 11.85 | 10.81 | 11.31 |
| GOPC         | 9.16  | 9.27  | 11.34 | 13.55 | 12.11 | 11.85 | 19.54 | 16.53 |
| 44264        | 12.63 | 12.42 | 10.85 | 11.4  | 12.52 | 11.87 | 10.32 | 11.04 |
| RANBP9       | 11.1  | 10.61 | 11.46 | 13.33 | 10.75 | 11.87 | 13.62 | 13    |
| SP1          | 11.3  | 10.36 | 11.44 | 12.3  | 11.96 | 11.87 | 14.43 | 13.28 |
| NAB1         | 9.86  | 9.59  | 11.07 | 13.41 | 11.63 | 11.87 | 18.14 | 15.67 |
| TFF3         | 13.79 | 12.67 | 11.87 | 10.05 | 11.34 | 11.89 | 10.28 | 9.29  |
| CBSL         | 8.28  | 11.71 | 15.79 | 13.49 | 6.1   | 11.89 | 8.07  | 9.83  |
| SMG9         | 9.6   | 9.67  | 10.34 | 9.48  | 12.16 | 11.89 | 10.94 | 10.75 |
| PTPN9        | 11.37 | 12.2  | 12.12 | 11.18 | 11.36 | 11.89 | 11.36 | 11.52 |
| KIAA0391     | 11.29 | 10.96 | 11.42 | 11.4  | 12.82 | 11.89 | 14.19 | 13.08 |
| AK4          | 13.52 | 12.83 | 13.74 | 15.04 | 12.14 | 11.89 | 14.98 | 13.83 |
| PPARD        | 11.06 | 10.95 | 12.48 | 11.37 | 10.86 | 11.9  | 11.01 | 11.06 |
| FAM103A1     | 11.25 | 11.94 | 11.48 | 14.99 | 12.9  | 11.9  | 14.55 | 15.24 |
| SEC62        | 11.45 | 11.72 | 12.66 | 14.96 | 12.69 | 11.9  | 20.21 | 17.3  |
| ANP32E       | 10.98 | 10.27 | 13.07 | 15.15 | 12.8  | 11.9  | 22.72 | 18.96 |
| INO80C       | 11.16 | 12.4  | 10.88 | 12.93 | 13.88 | 11.91 | 11.86 | 11.57 |
| SMAD3        | 10.46 | 10.58 | 11.01 | 11.12 | 11.87 | 11.91 | 11.89 | 11.6  |
| RNF113A      | 14.84 | 13.47 | 14.37 | 12.83 | 12.96 | 11.91 | 10.76 | 11.61 |
| TPD52        | 11.65 | 10.97 | 12.72 | 13.12 | 11.83 | 11.92 | 14.93 | 12.64 |
| CBARP        | 10.76 | 10.56 | 9.46  | 8.91  | 10.31 | 11.93 | 7.84  | 8.89  |
| DCAF11       | 11.85 | 12.02 | 11.75 | 11.69 | 13.26 | 11.93 | 11.05 | 12.59 |
| SEN2         | 9.93  | 9.12  | 11.58 | 11.77 | 12.24 | 11.93 | 15.24 | 14.47 |
| ARV1         | 10.02 | 11.01 | 11.21 | 11.84 | 12.51 | 11.93 | 16.2  | 14.66 |
| DYRK3        | 10.04 | 9.5   | 10.4  | 10.06 | 12.09 | 11.94 | 11.82 | 10.68 |
| EP300        | 12.86 | 12.2  | 12.91 | 14.16 | 12.31 | 11.94 | 13.54 | 13.69 |
| LRR20        | 11.57 | 12.4  | 11.89 | 10.78 | 11.89 | 11.95 | 9.02  | 10.62 |
| TAF4         | 11.35 | 10.36 | 11.07 | 11.51 | 10.78 | 11.95 | 11.65 | 11.49 |
| CDK5RAP2     | 10.99 | 10.14 | 12.31 | 12.96 | 12.09 | 11.95 | 14.43 | 13.07 |
| RWDD2B       | 9.57  | 9.95  | 10.89 | 11.08 | 12.08 | 11.95 | 15.29 | 13.15 |
| RAB3A        | 10.39 | 11.52 | 10.03 | 8.98  | 9.58  | 11.96 | 7.8   | 10.59 |
| NEDD9        | 14.96 | 15.18 | 14.78 | 16.18 | 12.16 | 11.96 | 12.8  | 12.6  |
| CCNE1        | 13.78 | 12.46 | 12.22 | 12.75 | 13.11 | 11.96 | 12.72 | 13.09 |
| MXD3         | 8.5   | 9.32  | 9.99  | 8.29  | 12.17 | 11.97 | 9.73  | 9.18  |
| MRPS11       | 12.12 | 10.98 | 11.46 | 10.04 | 12.85 | 11.97 | 10.34 | 12.15 |
| ARHGEF11     | 12.77 | 11.83 | 13.05 | 12.81 | 11.23 | 11.97 | 12.24 | 12.19 |
| ZNF384       | 12.81 | 12.34 | 12.73 | 13.13 | 11.9  | 11.97 | 13.26 | 13.52 |
| ALG5         | 12.31 | 12.16 | 13.6  | 11.89 | 13.87 | 11.97 | 13.98 | 14.63 |
| LOC107983993 | 11.05 | 10.76 | 10.21 | 11.52 | 11.54 | 11.97 | 17.98 | 15.62 |
| GCLC         | 9.89  | 9.29  | 10.53 | 12.46 | 12.84 | 11.97 | 17.23 | 16.55 |
| WEE1         | 10.76 | 10.4  | 11.24 | 11.05 | 11.94 | 11.98 | 12.59 | 11.8  |
| PARP12       | 18.56 | 17.36 | 18.2  | 18.46 | 12.45 | 11.98 | 12.99 | 11.94 |
| CDK6         | 9.98  | 9.26  | 11.47 | 15.86 | 11.99 | 11.98 | 21.48 | 18.8  |
| CYTH3        | 9.27  | 10.11 | 10.14 | 10.33 | 11.94 | 11.99 | 11.98 | 11.31 |
| CCDC71       | 12.87 | 12.83 | 12.44 | 12.03 | 12.99 | 11.99 | 9.03  | 11.73 |
| KLHL9        | 11.28 | 10.78 | 12.88 | 13.29 | 12.58 | 11.99 | 15.69 | 14.54 |
| NAA35        | 11.55 | 10.34 | 12.31 | 13.08 | 12.95 | 11.99 | 16.33 | 15.33 |
| CASKIN2      | 13.04 | 12.82 | 12.43 | 11.81 | 11.21 | 12    | 9.03  | 9.22  |
| RCOR2        | 20.46 | 18.43 | 18.45 | 17.82 | 11.71 | 12    | 9.94  | 10.95 |
| RANGRF       | 12.26 | 12.84 | 11.53 | 12.17 | 12.32 | 12    | 13.5  | 11.31 |
| HMG20A       | 12.22 | 11.98 | 11.91 | 12.47 | 12.62 | 12    | 13.37 | 13.73 |
| PSMB9        | 16.72 | 16.98 | 16.46 | 15.79 | 14.41 | 12.01 | 11.48 | 11.54 |
| C7orf43      | 10.71 | 10.5  | 10.66 | 11.17 | 11.92 | 12.01 | 10.87 | 11.87 |
| AUH          | 11.2  | 7.94  | 12.42 | 12.16 | 11.96 | 12.01 | 17.36 | 13.6  |
| SNX21        | 11.32 | 9.84  | 10.72 | 9.85  | 10.19 | 12.02 | 11.5  | 9.96  |
| PDCD2L       | 10.35 | 10.79 | 11.04 | 9.16  | 12.34 | 12.02 | 9.99  | 10.04 |
| FITM2        | 10.95 | 10.96 | 9.61  | 9.23  | 11.89 | 12.02 | 8.13  | 10.86 |
| LOC101060022 | 9.93  | 9.01  | 10.42 | 12.6  | 10.37 | 12.02 | 14.29 | 13.79 |
| ZNF32        | 12.72 | 10.36 | 11.46 | 11.73 | 9.94  | 12.03 | 11.91 | 10.62 |
| ARSD         | 13.12 | 13.59 | 12.65 | 12.96 | 11.75 | 12.03 | 11.49 | 11.41 |
| RNF216       | 13.65 | 13.27 | 13.71 | 13.17 | 11.59 | 12.03 | 11.38 | 12.23 |
| GPC3         | 20.12 | 23.99 | 19.9  | 18.8  | 12.29 | 12.03 | 11.89 | 13.32 |
| ME2          | 11.09 | 10.43 | 11.11 | 11.39 | 13.34 | 12.03 | 15.9  | 13.37 |
| KIAA0907     | 12.77 | 10.62 | 12.24 | 13.86 | 11.72 | 12.03 | 17.94 | 14.54 |
| ZBTB80S      | 9.44  | 9.6   | 10.34 | 11.11 | 11.63 | 12.04 | 14.66 | 13.15 |
| PRSS33       | 11.16 | 13.59 | 11.41 | 10.31 | 8.66  | 12.05 | 8.52  | 10.02 |
| PPFIBP1      | 12.8  | 11.32 | 13.83 | 15.03 | 12.84 | 12.05 | 17.14 | 15.8  |
| DSCR3        | 11.75 | 11.97 | 12.04 | 12.47 | 12.03 | 12.06 | 13.94 | 12.96 |
| RTF1         | 11.68 | 11.33 | 12.71 | 13.22 | 13.12 | 12.06 | 13.5  | 13.78 |
| FAM58A       | 11.32 | 11.04 | 10.57 | 9.66  | 10.02 | 12.07 | 9.54  | 9.1   |
| TRMT61A      | 9.92  | 9.83  | 10.05 | 8.91  | 11.97 | 12.07 | 9.58  | 9.24  |
| ARMC7        | 11.54 | 12.9  | 11.96 | 11.04 | 11.56 | 12.07 | 10.11 | 9.99  |
| FLCN         | 11.7  | 11.91 | 11.66 | 11.1  | 11.75 | 12.07 | 12.11 | 11.02 |
| MAB21L1      | 10.21 | 8.68  | 10.08 | 10.87 | 11.29 | 12.07 | 12.02 | 11.12 |
| TSR1         | 11.51 | 10.85 | 11.11 | 12.2  | 13.67 | 12.07 | 13.88 | 12.55 |
| C6orf226     | 12.47 | 12.04 | 12.58 | 8.45  | 10.32 | 12.08 | 8.82  | 9.44  |

|             |       |       |       |       |       |       |       |       |
|-------------|-------|-------|-------|-------|-------|-------|-------|-------|
| ALKBH4      | 11.72 | 11.52 | 10.93 | 10.09 | 10.76 | 12.08 | 9.69  | 9.9   |
| PHC1        | 11.17 | 10.86 | 10.77 | 11.59 | 12.12 | 12.08 | 12.57 | 11.96 |
| UNK         | 12.72 | 12.14 | 12.27 | 12.06 | 11.81 | 12.09 | 10.65 | 11.25 |
| MAML1       | 11.78 | 11.38 | 12.77 | 12.16 | 11.48 | 12.09 | 11.85 | 11.44 |
| URB1        | 10.65 | 10.54 | 10.71 | 10.54 | 11.96 | 12.09 | 11.24 | 11.8  |
| CUL4B       | 11.1  | 10.54 | 12.88 | 14.01 | 12.47 | 12.09 | 19.38 | 15.83 |
| KIAA1429    | 12.39 | 11.2  | 13.97 | 13.84 | 14.37 | 12.09 | 18.07 | 15.97 |
| FOXRED1     | 9.84  | 10.45 | 10.28 | 9.76  | 12.34 | 12.1  | 11.59 | 10.38 |
| FAHD2B      | 13.26 | 14.79 | 12.62 | 12.83 | 12.15 | 12.1  | 9.92  | 11.77 |
| MAD2L1BP    | 13.97 | 14.19 | 15.03 | 13.85 | 12.24 | 12.1  | 13.39 | 13.42 |
| CRK         | 11.27 | 10.31 | 11.56 | 13.49 | 11.9  | 12.11 | 16.42 | 13.44 |
| SLC27A4     | 10.06 | 10.66 | 9.9   | 9.23  | 10.93 | 12.12 | 8.88  | 10.07 |
| KYAT3       | 10.83 | 11.2  | 11.74 | 12.05 | 12.5  | 12.12 | 15.34 | 13.04 |
| PHKG2       | 10.96 | 11.9  | 11.63 | 10.05 | 11.33 | 12.13 | 10.86 | 11.42 |
| BRD1        | 12.82 | 12.01 | 13.4  | 12.72 | 11.84 | 12.13 | 12.91 | 12.63 |
| PHTF1       | 10.68 | 10.97 | 11.43 | 13.05 | 11.65 | 12.13 | 13.38 | 13.92 |
| NELL2       | 9.44  | 10.42 | 10.63 | 11.2  | 12.34 | 12.13 | 14.98 | 14.09 |
| CKAP2       | 11.52 | 10.03 | 11.8  | 13.59 | 12.29 | 12.13 | 18.9  | 16.04 |
| REEP6       | 13.67 | 14.22 | 12.27 | 12.03 | 12.19 | 12.14 | 8.34  | 8.94  |
| ATXN2       | 10.77 | 10.16 | 11.16 | 12.13 | 10.79 | 12.14 | 12.38 | 12.09 |
| MED12       | 12.27 | 13.27 | 11.69 | 11.58 | 12.03 | 12.14 | 12.19 | 12.69 |
| OCRL        | 13.38 | 12.36 | 13.86 | 13.41 | 12.16 | 12.14 | 14.28 | 13.13 |
| KIF1BP      | 11.21 | 10.96 | 11.67 | 12.72 | 12.16 | 12.14 | 13.99 | 13.23 |
| DLL1        | 12.29 | 11.54 | 11.27 | 11.74 | 12.34 | 12.15 | 11.03 | 10.99 |
| DHDDS       | 12.48 | 12.92 | 11.69 | 11.45 | 12.93 | 12.15 | 10.51 | 11.32 |
| NBEAL2      | 10.2  | 10.47 | 11.29 | 10.4  | 11.12 | 12.15 | 11.01 | 11.64 |
| TRAFD1      | 13.32 | 13.12 | 12.93 | 12.15 | 14.22 | 12.15 | 11.37 | 11.66 |
| MAN2A1      | 11.63 | 10.45 | 13    | 15.55 | 11.64 | 12.15 | 16.57 | 14.88 |
| ADAM17      | 12.3  | 12.31 | 14.28 | 13.86 | 12.78 | 12.15 | 15.3  | 15.14 |
| FAM136A     | 9.59  | 9.03  | 10.65 | 11.25 | 10.34 | 12.16 | 14.57 | 11.48 |
| DERA        | 12.9  | 12.75 | 12.7  | 13.22 | 11.93 | 12.16 | 16.23 | 11.81 |
| BCL10       | 11.23 | 9.84  | 12.19 | 12.92 | 12.83 | 12.16 | 16.08 | 13.85 |
| DECR2       | 11.84 | 10.28 | 10.84 | 10.19 | 11.99 | 12.17 | 10.36 | 9.25  |
| GSTO2       | 12.59 | 12.1  | 12.99 | 12.23 | 13.18 | 12.17 | 11.62 | 12.54 |
| KIF1B       | 11.77 | 11.91 | 12.4  | 12.99 | 12.26 | 12.17 | 15.5  | 14.44 |
| CCNL1       | 12.27 | 12.3  | 12.72 | 15.73 | 12.72 | 12.17 | 23.02 | 19.47 |
| ZNF524      | 11.64 | 10.81 | 12.18 | 9.99  | 9.59  | 12.18 | 6.96  | 6.95  |
| NDRG4       | 12.13 | 11.76 | 12.42 | 11.76 | 12.2  | 12.18 | 11.71 | 11.26 |
| TRIM29      | 11.76 | 13.34 | 12.11 | 11.64 | 12.74 | 12.18 | 10.72 | 11.73 |
| COL5A1      | 17.4  | 17.78 | 17.27 | 18.49 | 10.85 | 12.18 | 11.68 | 12.86 |
| PHACTR4     | 12.69 | 13.15 | 13.23 | 14.1  | 13.15 | 12.18 | 14.37 | 14.13 |
| SMC3        | 11.38 | 9.76  | 13.2  | 15.58 | 13.03 | 12.18 | 22.6  | 19.5  |
| RCCD1       | 10.49 | 10.34 | 11.1  | 9.06  | 11.64 | 12.2  | 9.81  | 9.69  |
| VPS18       | 12.06 | 12.45 | 11.8  | 10.27 | 12.3  | 12.2  | 9.92  | 10.97 |
| TIMM10B     | 10.63 | 11.69 | 11.31 | 12.02 | 12.07 | 12.2  | 13.99 | 14.35 |
| SPTSSA      | 9.57  | 10.28 | 10.26 | 11.8  | 13.07 | 12.2  | 16.62 | 14.91 |
| CAPN10      | 11.26 | 10.55 | 10.61 | 9.94  | 11.16 | 12.21 | 9.86  | 11.11 |
| KMT2B       | 10.82 | 11.69 | 10.78 | 11.02 | 11.95 | 12.21 | 10.89 | 11.74 |
| USP33       | 11.93 | 10.91 | 13.71 | 14.73 | 12.41 | 12.21 | 20.31 | 17.37 |
| SOX21       | 10.89 | 10.43 | 10.3  | 10.52 | 10.45 | 12.22 | 10.62 | 10.87 |
| APITD1-CORT | 11.21 | 12.82 | 11.39 | 12.24 | 12.82 | 12.22 | 12.53 | 11.27 |
| DOCK1       | 11.01 | 10.21 | 11.94 | 13.41 | 12.15 | 12.22 | 15.68 | 14.16 |
| FAM212A     | 14.29 | 12.6  | 12.12 | 10.42 | 11.27 | 12.23 | 9.48  | 9.41  |
| LOXL1       | 18.34 | 18.82 | 17.42 | 16.27 | 10.94 | 12.23 | 8.97  | 9.42  |
| LRFN3       | 13.2  | 13.04 | 13.48 | 11.9  | 11.12 | 12.23 | 8.9   | 10.78 |
| DNAJC9      | 13.18 | 11.33 | 13.2  | 13.74 | 13.24 | 12.23 | 14.02 | 12.37 |
| DUSP12      | 13.25 | 13.35 | 12.47 | 13.75 | 13.14 | 12.23 | 15.7  | 12.9  |
| VAMP8       | 15.99 | 15.68 | 14.37 | 13.11 | 15.23 | 12.23 | 13.54 | 13.95 |
| AMOTL2      | 12.86 | 11.48 | 12.71 | 12.43 | 13.47 | 12.24 | 12.37 | 11.29 |
| NEPRO       | 9.4   | 10.8  | 10.06 | 12.92 | 13.02 | 12.24 | 17.95 | 14.71 |
| PUS7        | 10.53 | 10.92 | 12.05 | 14.31 | 13.28 | 12.24 | 18.31 | 15.18 |
| TAF13       | 8.54  | 9.08  | 10.5  | 11.91 | 10.95 | 12.24 | 16.93 | 18.42 |
| C1orf174    | 10.42 | 11.17 | 11.56 | 12.68 | 12.16 | 12.25 | 13.77 | 13.85 |
| IL6ST       | 10.54 | 10.57 | 12.61 | 15.15 | 11.83 | 12.25 | 20.54 | 18.25 |
| MED14       | 11.57 | 10.77 | 12.63 | 13.17 | 12.87 | 12.26 | 15.9  | 14.37 |
| 44262       | 11.48 | 11.98 | 12.87 | 15.13 | 11.6  | 12.26 | 21.01 | 17.69 |
| HAUS7       | 12.61 | 13.09 | 11.48 | 10.81 | 12.61 | 12.27 | 10.42 | 11.72 |
| SS18        | 10.83 | 8.78  | 12.25 | 14.28 | 11.15 | 12.27 | 19.09 | 15.35 |
| RHOBTB2     | 13.78 | 14.72 | 13.99 | 13.42 | 12.33 | 12.28 | 10.41 | 11.63 |
| PDXK        | 12.92 | 12.82 | 12.83 | 12.29 | 12.2  | 12.28 | 10.59 | 11.77 |
| RBM14-RBM4  | 14.22 | 11.11 | 11.57 | 10.9  | 9.44  | 12.28 | 10.58 | 12.1  |
| OARD1       | 10.14 | 11.06 | 11.15 | 13.92 | 13.47 | 12.28 | 14.75 | 14.66 |
| WASL        | 12.05 | 10.95 | 13.05 | 14.32 | 13.52 | 12.28 | 17.76 | 16.84 |
| ASAP1       | 10.43 | 9.88  | 11.39 | 13.62 | 11.77 | 12.29 | 16.37 | 15.15 |
| OPA1        | 8.99  | 8.63  | 11.08 | 12.87 | 13.07 | 12.29 | 21.66 | 18.12 |
| RTKN        | 12.53 | 12.73 | 12.36 | 11.53 | 11.5  | 12.3  | 8.74  | 10.19 |
| LENG1       | 11.58 | 12.94 | 11.7  | 11.03 | 11.63 | 12.3  | 9.74  | 11.12 |
| XRCC1       | 13.24 | 12.42 | 12.21 | 11.11 | 10.89 | 12.31 | 10.27 | 11.06 |
| WBP1L       | 11.99 | 12.7  | 11.84 | 11.61 | 12.33 | 12.31 | 11.03 | 12.83 |
| NOL10       | 10.6  | 8.89  | 11.25 | 12.01 | 13.18 | 12.31 | 15.72 | 13.76 |
| VTA1        | 10.49 | 11.34 | 11.81 | 12.8  | 12.37 | 12.31 | 17.64 | 15.3  |
| WDR33       | 12.34 | 11.84 | 12.64 | 12.84 | 13.27 | 12.32 | 13.94 | 12.89 |
| GTF2A2      | 13.14 | 14.6  | 12.21 | 15.87 | 14.02 | 12.32 | 17.35 | 16.73 |
| GINS1       | 12.98 | 11.89 | 12.53 | 11.93 | 12.75 | 12.33 | 14.42 | 11.74 |
| WWP1        | 10.96 | 9.83  | 11.9  | 13.03 | 12.74 | 12.33 | 17.62 | 15.44 |
| AGK         | 13.54 | 12.93 | 13.92 | 15.17 | 12.24 | 12.33 | 16.05 | 15.73 |

|              |       |       |       |       |       |       |       |       |
|--------------|-------|-------|-------|-------|-------|-------|-------|-------|
| ABHD16B      | 15.44 | 12.75 | 12.31 | 12.24 | 11.56 | 12.34 | 8.96  | 9.47  |
| MRPS5        | 10.34 | 11.34 | 11.07 | 10.83 | 13.49 | 12.34 | 14.09 | 13.29 |
| SUPT20H      | 12.37 | 11.78 | 13.57 | 15.18 | 12.15 | 12.35 | 17.43 | 16.59 |
| BCL7A        | 11.78 | 11.98 | 11.1  | 11.35 | 13.06 | 12.36 | 11.67 | 11.75 |
| ARPP19       | 10.04 | 9.94  | 12.03 | 14.3  | 13.11 | 12.36 | 19.42 | 17.72 |
| HMBS         | 12.34 | 13.62 | 12.63 | 10.64 | 12.29 | 12.37 | 9.22  | 10.89 |
| TFIP11       | 12.11 | 10.39 | 12.38 | 11.41 | 11.96 | 12.37 | 11.08 | 11    |
| PGPEP1       | 10.92 | 11.8  | 10.58 | 11.47 | 12.29 | 12.37 | 11.54 | 11.15 |
| PVR          | 11.87 | 11.66 | 11.41 | 11.06 | 11.98 | 12.37 | 11.43 | 11.19 |
| NBN          | 12.17 | 11.12 | 11.54 | 12.75 | 12    | 12.37 | 19.22 | 16.33 |
| IL17RC       | 13.96 | 15.06 | 13.72 | 13.17 | 12.17 | 12.38 | 10.47 | 11.21 |
| SP2          | 12.03 | 11.48 | 12.27 | 12.33 | 12.9  | 12.38 | 11.29 | 12.49 |
| MYO1D        | 13.63 | 13.21 | 12.77 | 12.87 | 13.26 | 12.38 | 12.9  | 12.91 |
| TRA2A        | 13.39 | 13.32 | 14.97 | 16.8  | 12.76 | 12.38 | 20.79 | 18.35 |
| LRPAP1       | 11.71 | 11.86 | 11.47 | 11.06 | 11.72 | 12.39 | 9.75  | 10.96 |
| CCDC51       | 13.53 | 12.05 | 13.04 | 10.77 | 13.78 | 12.39 | 11.63 | 12.35 |
| NFIB         | 10.45 | 10.39 | 12.28 | 14.52 | 12.75 | 12.39 | 16.84 | 15.38 |
| RPAP1        | 12.06 | 12.71 | 11.29 | 11.2  | 12.45 | 12.4  | 10.78 | 11.81 |
| ORC6         | 10.14 | 9.72  | 11.06 | 12.54 | 11.94 | 12.4  | 15.11 | 12.35 |
| CEP68        | 11.88 | 11.4  | 13.97 | 12.66 | 12.93 | 12.4  | 12.65 | 13.07 |
| SDC2         | 13.92 | 13.24 | 14.63 | 13.87 | 12.45 | 12.4  | 13.59 | 13.57 |
| KBTBD2       | 12.17 | 10.34 | 12.49 | 11.6  | 11.95 | 12.4  | 17.01 | 13.68 |
| POLH         | 11.26 | 10.67 | 11.05 | 11.59 | 13.11 | 12.4  | 14.27 | 13.87 |
| PIGN         | 11.54 | 11.13 | 12.79 | 12.91 | 12.69 | 12.4  | 17.26 | 15.21 |
| FEM1A        | 11.74 | 11.85 | 11.56 | 10.83 | 11.54 | 12.41 | 9.84  | 10.98 |
| CHCHD4       | 9.36  | 8.4   | 8.79  | 9.52  | 12.14 | 12.41 | 11.66 | 11.33 |
| LOC100652901 | 11.08 | 10.01 | 12.75 | 15.66 | 11.29 | 12.41 | 20.4  | 19.29 |
| TPST2        | 10.83 | 11.71 | 12.04 | 11.92 | 12.11 | 12.43 | 10.7  | 11.48 |
| SGPL1        | 11.69 | 12.12 | 11.8  | 13.06 | 12.28 | 12.44 | 12.73 | 13.72 |
| LIG3         | 10.55 | 11.8  | 11.11 | 11.7  | 12.25 | 12.45 | 12.91 | 12.58 |
| FIP1L1       | 13.45 | 12.86 | 14.01 | 14.76 | 13.75 | 12.45 | 16.42 | 15.45 |
| TMEM39A      | 11.3  | 12.34 | 12.99 | 15.15 | 12.14 | 12.46 | 14.4  | 13.36 |
| CXCL6        | 12.92 | 12.67 | 13.64 | 13.54 | 14.76 | 12.46 | 16.85 | 15.65 |
| IFI44L       | 25.83 | 24.48 | 30.49 | 36.65 | 11.98 | 12.46 | 21.06 | 16.3  |
| RBM25        | 11.23 | 11.26 | 12.68 | 15.32 | 12.69 | 12.46 | 19.14 | 18.47 |
| RGS14        | 13.18 | 13.09 | 13.4  | 11.96 | 11.88 | 12.47 | 9.12  | 10.5  |
| ARID5A       | 16.31 | 15.85 | 16.81 | 14.33 | 11.96 | 12.47 | 9.55  | 11.84 |
| CHMP4A       | 12.09 | 12.86 | 12.47 | 12.96 | 12.63 | 12.47 | 12.84 | 13.62 |
| SLCO3A1      | 10.44 | 10.48 | 11.05 | 9.94  | 10.48 | 12.49 | 10.67 | 11.32 |
| PPRC1        | 12.66 | 11.66 | 11.86 | 11.96 | 12.72 | 12.49 | 12.23 | 11.77 |
| INPP5A       | 11.63 | 11.91 | 11.7  | 12.23 | 11.66 | 12.5  | 12.14 | 11.51 |
| RPE          | 11.18 | 11.01 | 13.04 | 13.12 | 12.36 | 12.5  | 17.9  | 15.83 |
| GTPBP1       | 13.57 | 14.06 | 13.21 | 13.5  | 12.87 | 12.51 | 10.46 | 12.46 |
| PLAGL2       | 12.6  | 13.29 | 14.34 | 13.33 | 11.88 | 12.52 | 12.69 | 13.26 |
| ACSF3        | 12.62 | 12.29 | 12.17 | 11.6  | 11.65 | 12.53 | 10.83 | 11.08 |
| C17orf58     | 14.38 | 10.64 | 12.45 | 12.98 | 11.66 | 12.53 | 14.43 | 12.2  |
| ANKRD40      | 12.67 | 12.87 | 13.69 | 14.75 | 13.07 | 12.53 | 15.1  | 15.58 |
| ZFPM1        | 11.94 | 11.78 | 11.51 | 10.79 | 10.48 | 12.54 | 7.62  | 7.71  |
| RBM28        | 10.09 | 9.68  | 11.4  | 10.85 | 12.92 | 12.54 | 15.39 | 14.32 |
| NBPF15       | 10.67 | 10.43 | 11.16 | 14.77 | 13.22 | 12.54 | 17.53 | 17.48 |
| ENTHD2       | 10.16 | 10.01 | 10.11 | 10.95 | 12.48 | 12.55 | 12.82 | 11.85 |
| CTNNA1       | 11.36 | 11.16 | 12.98 | 12.91 | 12.89 | 12.55 | 15.6  | 13.42 |
| MTMR4        | 14.22 | 13.93 | 13.77 | 14.24 | 13.14 | 12.56 | 14.08 | 13.63 |
| PIK3CB       | 11.15 | 10.81 | 12.26 | 12.54 | 12.65 | 12.56 | 15.93 | 15.15 |
| PPIL3        | 12.54 | 11.38 | 12.82 | 13.41 | 13.9  | 12.56 | 17.81 | 15.97 |
| RB1          | 10.33 | 10.1  | 12.05 | 13.92 | 12.48 | 12.56 | 23    | 17.29 |
| DNM1         | 13.77 | 13.34 | 13.6  | 13.58 | 11.49 | 12.57 | 10.06 | 12.01 |
| MAP3K10      | 12.07 | 11.64 | 12.11 | 10.88 | 12.33 | 12.58 | 9.51  | 10.35 |
| UBE2K        | 11.63 | 10.84 | 13.34 | 13.73 | 13.17 | 12.59 | 18.98 | 15.07 |
| UHRF2        | 11.53 | 10.9  | 13.43 | 14.94 | 13.58 | 12.59 | 18.22 | 16.03 |
| LPGAT1       | 10.26 | 10.47 | 12.14 | 16.06 | 13.15 | 12.59 | 18.94 | 16.41 |
| WHSC1L1      | 11.73 | 10.59 | 12.05 | 13.5  | 12.55 | 12.61 | 16.83 | 14.6  |
| ADGRA3       | 11.67 | 11.06 | 12.6  | 14.04 | 12.46 | 12.61 | 15.37 | 15    |
| MUTYH        | 15.02 | 12.18 | 11.76 | 11.12 | 11.21 | 12.62 | 11.04 | 10.82 |
| RNF185       | 11.95 | 12.84 | 11.66 | 11.94 | 12.22 | 12.62 | 11.91 | 11.75 |
| EXOC2        | 12.5  | 11.06 | 13.35 | 13.99 | 13.29 | 12.62 | 16.43 | 15.35 |
| KLHL22       | 12.45 | 12.55 | 13.08 | 12.04 | 11.13 | 12.63 | 9.53  | 10.05 |
| SLC25A44     | 12.54 | 12.69 | 11.74 | 12.58 | 13.17 | 12.63 | 12.38 | 14.23 |
| NT5M         | 13.26 | 11.26 | 12.52 | 11.48 | 12.55 | 12.64 | 10.44 | 10.73 |
| MED30        | 12.92 | 12.69 | 14.91 | 12.92 | 12.34 | 12.64 | 13.83 | 11.12 |
| ZFAND2B      | 11.68 | 12.16 | 12.13 | 12.96 | 11.28 | 12.64 | 11.36 | 11.41 |
| TMEM68       | 8.94  | 10.59 | 11.99 | 12.26 | 14.82 | 12.64 | 19.26 | 17.19 |
| LSP1         | 32.97 | 27.7  | 30.46 | 25.32 | 10.81 | 12.65 | 9.94  | 8.95  |
| VKORC1L1     | 12.83 | 11.33 | 12.81 | 13.25 | 12.93 | 12.65 | 14.87 | 13.4  |
| SLC7A1       | 12.45 | 11.84 | 11.68 | 12.12 | 11.93 | 12.66 | 11.58 | 12.11 |
| FKBP15       | 14.17 | 13.81 | 14.03 | 14.1  | 12.58 | 12.66 | 14.1  | 13.35 |
| PPP1R26      | 12.02 | 11.74 | 12.21 | 11.87 | 12.54 | 12.67 | 11    | 11.09 |
| TTC9C        | 11.71 | 12.53 | 11.24 | 12.51 | 11.39 | 12.68 | 13.63 | 12.68 |
| RAB5A        | 11.77 | 11.23 | 14.48 | 16.13 | 13.42 | 12.68 | 18.58 | 16.84 |
| NF1          | 11.26 | 10.84 | 14.09 | 15.01 | 13    | 12.68 | 18.49 | 17.11 |
| IFT20        | 10.26 | 10.61 | 11.1  | 10.59 | 12.29 | 12.69 | 14.72 | 12.67 |
| TMLHE        | 13.36 | 12.54 | 13.35 | 13.36 | 13.15 | 12.69 | 13.54 | 14.95 |
| MAGEA11      | 12.81 | 12.4  | 11.5  | 12.36 | 12.97 | 12.7  | 14.02 | 13.3  |
| NUP155       | 12.73 | 11.53 | 13.31 | 13.33 | 13.45 | 12.7  | 16.49 | 14.43 |
| GLS          | 10.11 | 10.1  | 11.48 | 13.11 | 12.94 | 12.7  | 20.32 | 16.8  |
| RAB3D        | 13.35 | 14.94 | 13.84 | 13.32 | 12.61 | 12.71 | 11.34 | 13.67 |

|              |       |       |       |       |       |       |       |       |
|--------------|-------|-------|-------|-------|-------|-------|-------|-------|
| LOC100289561 | 11.76 | 12.28 | 9.19  | 10.87 | 11.25 | 12.72 | 12.83 | 12.76 |
| MYADM        | 15.93 | 17.26 | 16.63 | 16.24 | 12.83 | 12.72 | 10.77 | 13.73 |
| NMNAT1       | 11.5  | 12.39 | 11.68 | 13.48 | 12.03 | 12.72 | 14.68 | 14.63 |
| HEXIM2       | 13.56 | 12.54 | 12.9  | 11.5  | 12.17 | 12.73 | 10.48 | 10.41 |
| KLHL36       | 12.12 | 12.44 | 12.71 | 12.38 | 12.88 | 12.73 | 13.39 | 13.07 |
| VAV3         | 10.76 | 8.89  | 11.98 | 12.35 | 14.09 | 12.73 | 19.65 | 16.98 |
| HOXD11       | 13.31 | 12.71 | 13.29 | 15.58 | 12.82 | 12.74 | 12.83 | 11.9  |
| TTC4         | 12.84 | 13.32 | 12.16 | 11.9  | 13.35 | 12.74 | 13.54 | 12.9  |
| SCNN1A       | 14.08 | 15.6  | 13.39 | 14.64 | 11.68 | 12.76 | 10.77 | 12.51 |
| KDM4A        | 12.38 | 13.56 | 11.87 | 13.14 | 12.82 | 12.76 | 12.01 | 12.56 |
| FAM83D       | 10.08 | 9.03  | 9.47  | 8.16  | 12.96 | 12.76 | 12.29 | 13.21 |
| SUGCT        | 8.22  | 9.98  | 9.57  | 8.12  | 13.03 | 12.77 | 11.35 | 10.52 |
| FAM118A      | 10.75 | 9.18  | 11.46 | 13.7  | 11.67 | 12.77 | 16.24 | 14.99 |
| TFDP2        | 12.73 | 12.22 | 14.19 | 12.9  | 14.28 | 12.78 | 15.78 | 13.89 |
| CXXC1        | 13.31 | 12.65 | 12.81 | 12.12 | 12.38 | 12.81 | 9.92  | 9.88  |
| GP1BB        | 12.1  | 13.31 | 12.06 | 12.8  | 11.25 | 12.81 | 9.17  | 10.31 |
| POMT1        | 12.63 | 12.57 | 12.34 | 12.45 | 13.03 | 12.81 | 12.04 | 11.76 |
| NUDT4        | 12.78 | 11.67 | 14.15 | 14.99 | 12.72 | 12.81 | 16.95 | 13.83 |
| MTA3         | 14.25 | 13.11 | 13.13 | 13.79 | 14.2  | 12.81 | 15.35 | 14.65 |
| CCDC85C      | 12.97 | 13.04 | 12.82 | 11.97 | 12.33 | 12.82 | 10.21 | 11.15 |
| SVBP         | 14.84 | 14.39 | 13.92 | 14.03 | 14.14 | 12.82 | 15.09 | 14.1  |
| PBX1         | 15.99 | 14.42 | 16.87 | 16.69 | 14.44 | 12.82 | 16.27 | 15.3  |
| SLC25A24     | 12.14 | 11.88 | 13.59 | 14.84 | 14.08 | 12.82 | 20.26 | 16.27 |
| LLPH         | 10.56 | 11.4  | 12.23 | 12.85 | 13.16 | 12.82 | 17.83 | 17.12 |
| ASCC1        | 11.62 | 12.28 | 12.9  | 12.99 | 13.83 | 12.83 | 14.92 | 14.22 |
| CREB3L2      | 13.79 | 12.74 | 13.98 | 14.77 | 13.41 | 12.83 | 16.02 | 15.28 |
| YTHDF3       | 11.92 | 10.25 | 13.99 | 15.84 | 13.79 | 12.83 | 18.71 | 16.35 |
| SIAH2        | 14.2  | 13.96 | 14.29 | 13.58 | 12.27 | 12.84 | 11.08 | 10.73 |
| TUBGCP6      | 11.41 | 10.66 | 11.08 | 11.78 | 12.33 | 12.84 | 13.42 | 13.49 |
| SMIM20       | 10.06 | 10.7  | 10.7  | 10.34 | 11.97 | 12.84 | 16.75 | 13.71 |
| ARIH1        | 12.84 | 11.99 | 13.63 | 15.43 | 12.84 | 12.84 | 15.28 | 14.93 |
| GATAD1       | 12.47 | 12.27 | 13.08 | 14.28 | 13.18 | 12.84 | 17.76 | 16.47 |
| C1D          | 12.78 | 13.22 | 13.94 | 12.22 | 15.44 | 12.84 | 16.68 | 16.57 |
| TJAP1        | 13.15 | 12.61 | 12.28 | 11.35 | 13.47 | 12.86 | 11.61 | 11.9  |
| RARG         | 14.43 | 14.64 | 13.17 | 12.43 | 12.76 | 12.86 | 10.64 | 12.02 |
| PPA2         | 11.37 | 11.51 | 12.58 | 13.56 | 12.39 | 12.86 | 16.29 | 13.37 |
| DYM          | 12.13 | 12.22 | 11.85 | 12.61 | 13.57 | 12.86 | 15.15 | 15.35 |
| CADM4        | 13.46 | 15.34 | 14.69 | 12.99 | 12.76 | 12.87 | 10.52 | 12.91 |
| MSL1         | 12.47 | 11.98 | 13.17 | 11.89 | 12.06 | 12.87 | 12.64 | 13.02 |
| SLC35F6      | 12.69 | 13.2  | 12.29 | 12.39 | 12.37 | 12.87 | 11.71 | 13.1  |
| ARFGAP3      | 12.8  | 12.38 | 12.37 | 13.73 | 13.03 | 12.87 | 14.68 | 13.24 |
| USP9X        | 13.2  | 11.2  | 14.97 | 16.59 | 13.5  | 12.88 | 19.3  | 18.17 |
| HES6         | 9.99  | 11.62 | 11.45 | 9.57  | 10.92 | 12.89 | 9.47  | 9.24  |
| TIMM9        | 12.83 | 13.5  | 13.87 | 14.29 | 15.9  | 12.89 | 16.99 | 14.3  |
| CRYL1        | 14.21 | 15.29 | 14.01 | 13.29 | 14.22 | 12.9  | 11.75 | 11.74 |
| TMEM44       | 11.3  | 11.47 | 11.01 | 12.11 | 11.92 | 12.9  | 11.82 | 12.17 |
| NUP214       | 13.32 | 13.02 | 13.36 | 13.33 | 13.08 | 12.9  | 12.76 | 13.53 |
| UNC50        | 12.58 | 12.73 | 13.42 | 14.31 | 12.44 | 12.9  | 16.93 | 15.8  |
| CPED1        | 10.88 | 10.71 | 12.41 | 12.63 | 13.55 | 12.9  | 17.64 | 16.04 |
| THAP3        | 12.05 | 13.53 | 11.86 | 11.99 | 14.16 | 12.91 | 10.67 | 11.53 |
| LIG1         | 13.59 | 12.26 | 12.11 | 11.47 | 13.46 | 12.91 | 12.5  | 13.35 |
| CDR2         | 12.85 | 13.5  | 13.38 | 14.48 | 14.09 | 12.92 | 15.75 | 13.18 |
| TP53BP1      | 12.94 | 13.12 | 14.61 | 14.95 | 13.69 | 12.92 | 16.35 | 14.25 |
| RAD50        | 10.01 | 9.86  | 12.91 | 13.76 | 12.46 | 12.92 | 21.14 | 17.56 |
| CBY1         | 13.83 | 15.36 | 13.62 | 11.91 | 14.03 | 12.93 | 11.46 | 13.59 |
| 44450        | 11.59 | 10.97 | 13.01 | 14.88 | 12.99 | 12.93 | 19.24 | 16.87 |
| BTBD3        | 12.72 | 12.22 | 14.17 | 15.9  | 13.45 | 12.94 | 18.42 | 16.37 |
| LRRC45       | 14.39 | 13.7  | 13.65 | 12.96 | 12.41 | 12.95 | 10.15 | 10    |
| NBPF1        | 13.05 | 13.18 | 13.13 | 13.56 | 12.23 | 12.95 | 13.89 | 12.78 |
| GTF2H3       | 10.78 | 9.35  | 11.27 | 13.95 | 13.23 | 12.95 | 19.08 | 16.39 |
| RMI2         | 13.76 | 13.27 | 12.48 | 12.48 | 13.83 | 12.96 | 13.54 | 12.47 |
| AKT3         | 11    | 12.35 | 14.56 | 15.04 | 13.71 | 12.96 | 18.63 | 16.89 |
| ARHGEF40     | 13.98 | 15.2  | 13.8  | 12.32 | 13.15 | 12.97 | 11.72 | 12.35 |
| TBCE         | 10.68 | 10.99 | 11.15 | 10.99 | 12.96 | 12.97 | 14.58 | 13.35 |
| ROBO1        | 13.16 | 12.49 | 14.61 | 16.8  | 12.51 | 12.97 | 16.42 | 15.57 |
| SLC6A15      | 10.16 | 9.53  | 11.73 | 12.23 | 13.63 | 12.97 | 16.93 | 16.32 |
| ATPAF2       | 13.02 | 12.3  | 12.11 | 9.75  | 11.41 | 12.98 | 10.2  | 10.89 |
| PRIM1        | 11.83 | 11.64 | 11.47 | 12.99 | 13.57 | 12.98 | 15.6  | 12.26 |
| F8A1         | 14.48 | 13.78 | 12.11 | 13.59 | 12.55 | 12.98 | 10.9  | 12.55 |
| RRAS2        | 11.5  | 10.52 | 11.75 | 11.86 | 12.46 | 12.98 | 13.7  | 12.61 |
| SLC30A1      | 9.33  | 8.84  | 8.77  | 10.11 | 12.71 | 12.98 | 13.97 | 13.51 |
| RSRP1        | 11.63 | 10.94 | 13.54 | 16.29 | 12.48 | 12.98 | 22.55 | 18.56 |
| PDPK1        | 11.25 | 10.88 | 11.53 | 12.37 | 12.13 | 12.99 | 13.55 | 12.81 |
| GRPEL1       | 11.78 | 12.78 | 12.85 | 12.07 | 13.87 | 12.99 | 13.44 | 13.33 |
| GMD5         | 11.58 | 12.19 | 11.92 | 10.39 | 12.49 | 13    | 11.37 | 10.49 |
| TOM1L2       | 12.21 | 11.87 | 12.25 | 12.15 | 13.51 | 13.02 | 10.98 | 12.21 |
| SUGT1        | 12.66 | 12.94 | 13.22 | 14.44 | 14.32 | 13.02 | 18.94 | 16.81 |
| SCAMP1       | 12    | 12.29 | 13.22 | 14.93 | 13.83 | 13.02 | 21.65 | 18.63 |
| C1QL1        | 19.31 | 19.53 | 17.22 | 16.9  | 12.39 | 13.04 | 7.81  | 9.22  |
| SNAP29       | 11.37 | 11.31 | 12.95 | 12.4  | 13.54 | 13.04 | 13.29 | 13.3  |
| CHD3         | 12.52 | 13.53 | 12.61 | 13.34 | 13.29 | 13.04 | 12.45 | 13.31 |
| MARK3        | 13.4  | 13    | 13.71 | 13.65 | 14.69 | 13.04 | 16.91 | 15.75 |
| GFER         | 13.72 | 14.39 | 12.61 | 13.17 | 14.75 | 13.05 | 9.68  | 12.31 |
| SPIDR        | 13.18 | 12.92 | 12.65 | 13.34 | 12.3  | 13.07 | 15.66 | 14.46 |
| SMIM15       | 11.99 | 12.29 | 13.31 | 14.75 | 14.58 | 13.08 | 19.57 | 17.52 |
| C14orf159    | 13.27 | 12.51 | 12.55 | 11.97 | 13.09 | 13.09 | 12.6  | 12.42 |



|              |       |       |       |       |       |       |       |       |
|--------------|-------|-------|-------|-------|-------|-------|-------|-------|
| WDR75        | 11.89 | 10.97 | 13.27 | 15.17 | 13.38 | 13.09 | 18.29 | 15.81 |
| ZC3H7A       | 11.59 | 11.49 | 13.47 | 13.5  | 13.29 | 13.09 | 19.43 | 16.61 |
| LOC101060341 | 11.08 | 9.58  | 11.69 | 13.61 | 12.25 | 13.1  | 19.41 | 16.97 |
| GGT1         | 10.58 | 11.44 | 11.08 | 11.47 | 11.12 | 13.11 | 10.04 | 10.38 |
| OSCP1        | 14.23 | 14.14 | 13.52 | 12.85 | 13.86 | 13.12 | 11.15 | 13.91 |
| ELK3         | 12.33 | 11.65 | 14.54 | 16.63 | 13.57 | 13.12 | 17.53 | 16.67 |
| TMEM87A      | 10.47 | 10.33 | 12.85 | 13.07 | 14.98 | 13.13 | 17.01 | 14.54 |
| PSEN1        | 13.5  | 13.51 | 14.63 | 13.75 | 13.21 | 13.13 | 15.36 | 14.68 |
| PCTP         | 13.53 | 15.31 | 14.44 | 14.86 | 13.48 | 13.14 | 13.48 | 14.78 |
| CCNC         | 11.7  | 11.98 | 12.14 | 12.71 | 14.07 | 13.14 | 18.89 | 15.67 |
| CD109        | 13.48 | 12.36 | 15.32 | 17.95 | 13.21 | 13.14 | 19.54 | 17.92 |
| RGS19        | 12.22 | 12.28 | 12.24 | 11.45 | 13.61 | 13.16 | 10.51 | 11.34 |
| FOXJ3        | 13.7  | 13.11 | 14.51 | 14.7  | 14.29 | 13.17 | 17.29 | 15.44 |
| KLF10        | 14.82 | 13.74 | 14.11 | 14.13 | 14.24 | 13.18 | 16.61 | 14.24 |
| NFX1         | 11.86 | 11.71 | 12.62 | 14.14 | 14.01 | 13.18 | 15.84 | 14.89 |
| ABCD4        | 11.6  | 11.75 | 11.34 | 11.44 | 10.77 | 13.19 | 11.63 | 11.43 |
| CTDP1        | 13.65 | 13.72 | 12.79 | 12.55 | 12.6  | 13.2  | 10.85 | 11.31 |
| NSMCE3       | 12.72 | 12.73 | 10.85 | 12.01 | 10.35 | 13.2  | 10.55 | 11.6  |
| PIM2         | 12.29 | 12.85 | 12.24 | 11.97 | 13.09 | 13.2  | 11.26 | 12.19 |
| ZFYVE19      | 11.95 | 12.88 | 13.1  | 12.92 | 13    | 13.2  | 12.45 | 13.25 |
| EEF2K        | 12.34 | 13.1  | 12.83 | 12.48 | 12.82 | 13.2  | 12.39 | 13.71 |
| TPGS1        | 12.04 | 12.19 | 11.62 | 9.67  | 12.66 | 13.22 | 8.43  | 8.7   |
| TMEM185B     | 12.13 | 12.51 | 11.92 | 11.89 | 13.12 | 13.22 | 12.2  | 12.34 |
| PPP4R3A      | 10.75 | 10.55 | 12.77 | 13.69 | 13.92 | 13.22 | 18.25 | 16.77 |
| RBM6         | 12.5  | 12.46 | 13.94 | 14.62 | 14    | 13.22 | 18.75 | 17    |
| POLM         | 11.37 | 12.06 | 10.81 | 11.43 | 13.15 | 13.23 | 13.04 | 12.71 |
| EXOSC3       | 12.15 | 11.96 | 12.8  | 13.38 | 13.83 | 13.23 | 15.32 | 12.82 |
| CLN8         | 8.97  | 8.45  | 8.47  | 8.99  | 13.22 | 13.24 | 13.94 | 12.95 |
| SPAG4        | 20.75 | 18.47 | 17.4  | 17.63 | 11.86 | 13.25 | 11.16 | 12.36 |
| CCNY         | 12.3  | 12.71 | 11.74 | 12.89 | 13.74 | 13.25 | 13.88 | 13.14 |
| ZNF317       | 13.96 | 14.55 | 15.26 | 13.81 | 14.38 | 13.25 | 13.91 | 13.19 |
| TRAF2        | 13.75 | 12.8  | 13.12 | 11.81 | 13.12 | 13.27 | 11.41 | 11.9  |
| THEM4        | 13.43 | 11.99 | 15.11 | 15.66 | 14.48 | 13.28 | 18.73 | 17.66 |
| CDK11A       | 12.07 | 13.17 | 12.99 | 12.46 | 13.11 | 13.29 | 14.35 | 12.94 |
| LIMD1        | 14.23 | 14.23 | 14.42 | 15.51 | 13.58 | 13.29 | 12.91 | 13.79 |
| MESDC1       | 11.35 | 10.73 | 11.95 | 10.67 | 12.26 | 13.3  | 8.86  | 10.22 |
| HCCS         | 13.08 | 13.61 | 13.69 | 13.16 | 14.36 | 13.3  | 13.4  | 13.58 |
| EDIL3        | 15.53 | 14.73 | 16.74 | 20.55 | 14.58 | 13.3  | 21.08 | 18.33 |
| SERINC5      | 11.08 | 11.12 | 12.28 | 12.7  | 13.75 | 13.31 | 16.37 | 16.2  |
| ZNF277       | 11.54 | 11.92 | 13.06 | 14.87 | 15.06 | 13.31 | 19.7  | 16.75 |
| KLHL26       | 14.67 | 14.25 | 13.66 | 12.79 | 12.08 | 13.32 | 9.66  | 10.81 |
| ABTB2        | 12.21 | 13.14 | 12.38 | 11.95 | 11.96 | 13.33 | 10.79 | 11.11 |
| ALKBH2       | 13.98 | 14.48 | 12.63 | 12.53 | 13.52 | 13.33 | 12.34 | 12.16 |
| EMC2         | 13.35 | 14.88 | 15.12 | 15.85 | 15.21 | 13.33 | 23.07 | 22.24 |
| ELP5         | 12.55 | 12.26 | 10.39 | 11.97 | 11.79 | 13.34 | 10.23 | 11.33 |
| CCDC43       | 11.06 | 10.3  | 11.67 | 13.23 | 13.61 | 13.34 | 17.65 | 15.4  |
| UFM1         | 11.63 | 11.51 | 12.82 | 15.1  | 14.15 | 13.34 | 23.27 | 19.69 |
| POLR2J2      | 19.02 | 17.43 | 14.55 | 17.59 | 16.69 | 13.35 | 14.68 | 16.63 |
| SVIP         | 12.45 | 10.16 | 12.08 | 11.89 | 12.8  | 13.36 | 11.81 | 11.87 |
| RGS2         | 14.11 | 15.02 | 16.14 | 16.12 | 11.58 | 13.36 | 17.99 | 14.73 |
| ELL2         | 14.19 | 14.08 | 14.97 | 17.27 | 13.41 | 13.36 | 18.97 | 16.82 |
| RBMX2        | 13.82 | 13.23 | 13.13 | 12.69 | 15.05 | 13.37 | 12.47 | 14.4  |
| SMARCA2      | 15.91 | 15.83 | 16.19 | 18.62 | 15.01 | 13.37 | 17.62 | 17.43 |
| SEMA3A       | 15.09 | 14.03 | 17.36 | 21    | 13.69 | 13.37 | 22.19 | 18.87 |
| SIPA1L3      | 12.99 | 13.67 | 13.18 | 13.07 | 12.74 | 13.38 | 11.41 | 12.51 |
| DHX37        | 13.16 | 12.75 | 12.26 | 11.15 | 13.21 | 13.39 | 11.8  | 11.26 |
| ZNF516       | 12.97 | 12.11 | 12.76 | 13.14 | 11.98 | 13.39 | 12.37 | 13.47 |
| TEAD2        | 15.05 | 16.27 | 14.45 | 13.75 | 14.45 | 13.39 | 11.69 | 13.75 |
| FTO          | 12.85 | 13.85 | 12.86 | 13.43 | 13.54 | 13.39 | 14.64 | 14.42 |
| MEX3A        | 15.69 | 15.17 | 15.89 | 15.91 | 14.31 | 13.39 | 14.05 | 14.51 |
| RABGEF1      | 12.34 | 11.57 | 13.29 | 13.69 | 14.02 | 13.4  | 15.93 | 15.55 |
| PSPC1        | 13.82 | 13.13 | 13.49 | 13.2  | 14.13 | 13.41 | 14.64 | 13.74 |
| SSH1         | 14.34 | 14.06 | 14.47 | 14.57 | 13.62 | 13.42 | 15.15 | 14.59 |
| ISCA1        | 11.31 | 12.76 | 12.93 | 13.91 | 13.49 | 13.42 | 18.09 | 14.94 |
| RPA3         | 14.35 | 14.57 | 14.74 | 14.99 | 16.14 | 13.42 | 16.22 | 15.17 |
| PDHX         | 10.75 | 12.02 | 12.28 | 12.84 | 13.59 | 13.42 | 17.41 | 16.06 |
| ARMC1        | 11.89 | 11.57 | 12.33 | 14.26 | 14.67 | 13.42 | 19.94 | 16.75 |
| SOX15        | 13.66 | 14.85 | 12.55 | 13.33 | 12.07 | 13.43 | 8.37  | 11.28 |
| SLC37A4      | 11.76 | 11.66 | 11.41 | 10.94 | 12.87 | 13.43 | 12.09 | 11.77 |
| LUC7L        | 14.15 | 12.47 | 14.07 | 13.25 | 12.51 | 13.43 | 15.12 | 14.1  |
| TCF20        | 12.68 | 12.62 | 12.67 | 13.08 | 14.13 | 13.43 | 13.89 | 14.27 |
| SMUG1        | 17.03 | 14.97 | 15.52 | 13.51 | 13.99 | 13.43 | 12.68 | 15    |
| ADCK4        | 15.62 | 15.46 | 15.01 | 14.26 | 13.03 | 13.44 | 11.21 | 13.97 |
| IGFBP5       | 16.26 | 19.03 | 16.3  | 17.76 | 11.63 | 13.44 | 11.43 | 14.83 |
| CD58         | 12.24 | 13.32 | 13.23 | 14.38 | 12.69 | 13.44 | 22.65 | 15.93 |
| KRBA1        | 12.9  | 12.58 | 12.71 | 12.11 | 13.96 | 13.45 | 11.92 | 13.6  |
| VCAN         | 11.24 | 9.79  | 11.75 | 13.42 | 14.12 | 13.45 | 20.73 | 20.92 |
| KLHL17       | 11.13 | 9.48  | 11.11 | 10.67 | 12.58 | 13.46 | 10.98 | 11.62 |
| REPS1        | 14.58 | 13.28 | 15.05 | 14.6  | 12.62 | 13.46 | 15.15 | 14.35 |
| PDCD4        | 9.97  | 10.8  | 13.53 | 14.42 | 14.45 | 13.47 | 19.18 | 19.21 |
| ZNF316       | 12.44 | 12.44 | 12.5  | 11.5  | 12.58 | 13.48 | 10.61 | 10.77 |
| ASAP3        | 13.25 | 14.75 | 13.2  | 13.5  | 13.26 | 13.49 | 12.06 | 13.77 |
| ZC3HAV1      | 15.21 | 14.57 | 16.97 | 17.94 | 14.17 | 13.49 | 15.63 | 15.42 |
| DHX36        | 11.17 | 10.74 | 13.61 | 15.55 | 13.74 | 13.49 | 23.62 | 19.08 |
| MSRB1        | 14.78 | 15.97 | 14.23 | 12.53 | 14.13 | 13.51 | 10.62 | 11.31 |
| TJP2         | 13.31 | 12.94 | 12.33 | 12.89 | 14.09 | 13.51 | 13.19 | 12.54 |

|              |       |       |       |       |       |       |       |       |
|--------------|-------|-------|-------|-------|-------|-------|-------|-------|
| FBXW4        | 15.52 | 14.85 | 15.24 | 15.19 | 13.09 | 13.52 | 13.14 | 13.62 |
| CDC23        | 12.45 | 13.63 | 13.73 | 13.82 | 14.6  | 13.54 | 17.68 | 15.42 |
| ASCC3        | 11.05 | 9.11  | 11.81 | 13.11 | 13.44 | 13.55 | 20.12 | 17.4  |
| C16orf72     | 13.17 | 12.78 | 15.14 | 15.99 | 14.7  | 13.56 | 18.64 | 16.35 |
| IFNGR1       | 13.77 | 12.1  | 14.62 | 14.77 | 13.79 | 13.56 | 19.8  | 17.38 |
| TL3          | 15.4  | 15.39 | 14.67 | 14.76 | 12.25 | 13.57 | 10.28 | 12.57 |
| MFS11        | 12.27 | 12.71 | 12.87 | 13.72 | 13.86 | 13.57 | 15.36 | 14.53 |
| DMWD         | 14.45 | 14.13 | 14.16 | 13.27 | 12.84 | 13.58 | 10.86 | 11.23 |
| TTC19        | 12.31 | 11.86 | 13    | 13.17 | 13.42 | 13.58 | 15.13 | 13.98 |
| UPF3A        | 12.53 | 11.3  | 14.12 | 14.59 | 14.78 | 13.58 | 19.1  | 17.29 |
| LMBRD1       | 13.24 | 13.23 | 13.96 | 15.03 | 13.72 | 13.59 | 19.52 | 15.94 |
| HACD2        | 12.17 | 10.59 | 13.14 | 13.17 | 14.21 | 13.61 | 19.52 | 17.24 |
| BCLAF1       | 11.59 | 11.15 | 14.42 | 17.18 | 14.65 | 13.61 | 24.86 | 20.75 |
| CDC45        | 16.26 | 13.63 | 14.01 | 13.87 | 14.8  | 13.63 | 12.44 | 11.33 |
| CCDC74B      | 14.44 | 14.06 | 13.31 | 13.36 | 13.86 | 13.63 | 12.37 | 13.21 |
| EEF2KMT      | 12.98 | 12.97 | 11.7  | 11.83 | 14.15 | 13.63 | 12.17 | 13.4  |
| MDC1         | 14.83 | 14.51 | 14.51 | 14.94 | 13.28 | 13.64 | 13.49 | 14.3  |
| TMBIM4       | 13.47 | 12.88 | 12.99 | 14.35 | 13.48 | 13.64 | 16.71 | 16.18 |
| FUNDC1       | 12.85 | 14.05 | 12.95 | 14.44 | 15.36 | 13.66 | 17.03 | 16.76 |
| NF2          | 11.43 | 12.02 | 11.28 | 11.52 | 13.61 | 13.68 | 12.12 | 12.16 |
| HMMR         | 11.93 | 11.52 | 12.43 | 13.7  | 14.81 | 13.68 | 20.55 | 18.43 |
| TRAPPC9      | 13.76 | 14.69 | 13.51 | 12.72 | 13.15 | 13.69 | 11.83 | 12.82 |
| MORN5        | 12.89 | 13.41 | 13.74 | 12.46 | 15.17 | 13.69 | 13.85 | 16.25 |
| UBE3A        | 12.11 | 11.11 | 13.31 | 14.4  | 13.85 | 13.69 | 19.54 | 16.26 |
| PAWR         | 12.19 | 11.91 | 14.15 | 16.42 | 12.96 | 13.69 | 18.43 | 16.61 |
| IFT22        | 14.71 | 14.79 | 14.54 | 13.91 | 15.36 | 13.7  | 13.83 | 14.34 |
| RABGAP1      | 13.21 | 13.17 | 14.49 | 16.41 | 14.63 | 13.7  | 18.12 | 18.42 |
| MTIF3        | 11.87 | 11.6  | 13.07 | 13.41 | 14.48 | 13.71 | 17.04 | 14.52 |
| 44449        | 12.88 | 11.78 | 12.16 | 14.66 | 13.59 | 13.71 | 18.53 | 17.12 |
| SDHAF1       | 11.77 | 11.96 | 10.14 | 9.78  | 11.19 | 13.72 | 9.14  | 11.83 |
| IKBIP        | 11.76 | 12.33 | 14.34 | 15.44 | 13.9  | 13.72 | 19.57 | 16.25 |
| JMJ7         | 9.88  | 12.52 | 12.75 | 10.49 | 14.26 | 13.73 | 13.48 | 12.3  |
| KANK2        | 14.58 | 13.7  | 13.73 | 13.7  | 12.93 | 13.73 | 11.67 | 13.22 |
| ZNF513       | 12.92 | 14.71 | 14    | 12.62 | 14.8  | 13.73 | 12.67 | 14.12 |
| FAHD1        | 12.33 | 12.99 | 12.36 | 13.02 | 16.55 | 13.73 | 15.24 | 15.62 |
| TSNAX        | 10.76 | 9.34  | 13.07 | 17.23 | 14.04 | 13.73 | 25.98 | 21.5  |
| ARL4D        | 13.11 | 13.34 | 13.15 | 12.47 | 13.81 | 13.74 | 11.08 | 11.52 |
| PANK4        | 13    | 13.25 | 12.05 | 11.75 | 13.21 | 13.74 | 10.65 | 11.82 |
| ATHL1        | 11.26 | 11.43 | 11.69 | 11.88 | 12.22 | 13.74 | 14.53 | 14.29 |
| OBFC1        | 11.93 | 10.95 | 12.11 | 12.38 | 14.49 | 13.74 | 15.07 | 14.9  |
| TMEM181      | 10.91 | 10.61 | 12.89 | 15.62 | 14.07 | 13.74 | 19.84 | 19.51 |
| UBE2L6       | 25.6  | 28.32 | 24.4  | 22.04 | 14.71 | 13.75 | 12.88 | 14.16 |
| LIX1L        | 13.28 | 14.31 | 14.77 | 15.11 | 13.62 | 13.76 | 14.09 | 15.6  |
| PHYKPL       | 12.97 | 12.61 | 12.82 | 12.3  | 13.92 | 13.77 | 14.24 | 13.45 |
| MAP2K3       | 12.64 | 14.34 | 13.04 | 12.24 | 12.6  | 13.78 | 11.09 | 12.35 |
| PDXDC1       | 11.57 | 11.4  | 12.66 | 12.15 | 10.9  | 13.81 | 14.52 | 13.14 |
| MINPP1       | 11.41 | 11.15 | 12.62 | 13.1  | 13.47 | 13.81 | 15.36 | 14.45 |
| FAT2         | 12.52 | 13    | 12.63 | 13.7  | 12.9  | 13.81 | 15.42 | 14.88 |
| SP110        | 21.61 | 21.47 | 21.4  | 21.85 | 16.11 | 13.81 | 17.44 | 14.9  |
| SNAI2        | 12.13 | 10.85 | 14.26 | 13.59 | 13.15 | 13.81 | 17.9  | 16.1  |
| TARBP1       | 12.53 | 11.87 | 13.05 | 14.5  | 14.21 | 13.81 | 20.78 | 17.07 |
| CTR9         | 12.85 | 11.7  | 13.47 | 15.01 | 14.82 | 13.81 | 20.25 | 17.52 |
| PPP4R3B      | 13.95 | 11.65 | 14.88 | 16.83 | 14.66 | 13.81 | 20.61 | 18.09 |
| TPR          | 11.22 | 11.22 | 14.34 | 17.01 | 14.14 | 13.81 | 27.99 | 22.97 |
| UCK1         | 13.46 | 13.59 | 12.34 | 12.34 | 13.92 | 13.82 | 12.86 | 13.35 |
| MYD88        | 16.07 | 17.01 | 16.56 | 16.65 | 13.92 | 13.82 | 12.86 | 14.32 |
| SEC63        | 13.25 | 12.28 | 15.21 | 16.48 | 15.5  | 13.82 | 21.46 | 18.96 |
| VAMP7        | 11.92 | 11.31 | 13.91 | 14.92 | 15.82 | 13.82 | 20.57 | 19.98 |
| EVA1A        | 15.55 | 14.39 | 14.29 | 14.98 | 14.5  | 13.83 | 13.15 | 12.72 |
| HILPDA       | 16.16 | 15.49 | 15.72 | 15.58 | 13.98 | 13.83 | 15.64 | 14.5  |
| SLC23A2      | 13.35 | 11.88 | 13.63 | 14.01 | 14.54 | 13.83 | 15.77 | 14.63 |
| CAMKK2       | 12.62 | 12.98 | 13.17 | 12.5  | 13.8  | 13.85 | 12.92 | 13.19 |
| SYAP1        | 12.55 | 12.14 | 13.45 | 14.8  | 14.08 | 13.85 | 17.7  | 16.37 |
| FBXL6        | 11.89 | 11.68 | 11    | 10.79 | 12.71 | 13.86 | 13.05 | 12.34 |
| UGGT1        | 11.64 | 11.42 | 12.32 | 13.12 | 14.04 | 13.86 | 16.21 | 15.44 |
| LOC100653061 | 13.32 | 11.47 | 12.45 | 15.43 | 8.77  | 13.87 | 15.36 | 15.57 |
| TRIM5        | 16.48 | 16.82 | 18.33 | 18.9  | 14.34 | 13.87 | 18.55 | 16.28 |
| ZNF428       | 15.97 | 16.63 | 16.42 | 14.55 | 15.5  | 13.88 | 12    | 12.71 |
| MAPKBP1      | 12.92 | 12.93 | 12.57 | 11.94 | 13.59 | 13.88 | 12.43 | 13.75 |
| SELT         | 12.75 | 12.15 | 13.15 | 13.6  | 13.79 | 13.9  | 18.11 | 15.26 |
| VPS37C       | 15.07 | 14.64 | 14.14 | 14.22 | 14.72 | 13.91 | 12.57 | 13.65 |
| SAV1         | 14.1  | 12.96 | 14.77 | 16.98 | 15.57 | 13.91 | 19.89 | 16    |
| PLOD2        | 17.85 | 17.26 | 20.58 | 22.99 | 14.03 | 13.92 | 23.17 | 20.24 |
| WDYHV1       | 12.93 | 13.69 | 11.6  | 12.99 | 13.88 | 13.93 | 13.96 | 12.57 |
| MMP10        | 21.84 | 24.51 | 24.92 | 23.38 | 12.92 | 13.93 | 15.08 | 17.42 |
| RRM2B        | 9.78  | 9.12  | 12.05 | 14.13 | 14.98 | 13.93 | 26.52 | 20.98 |
| DISP2        | 9.99  | 9.67  | 9.11  | 8.71  | 13.17 | 13.94 | 11.18 | 11.59 |
| RAB29        | 11.14 | 11.96 | 11.35 | 11.96 | 14.09 | 13.94 | 16.6  | 14.32 |
| NCOR1        | 13.43 | 12.42 | 14.62 | 15.66 | 14.54 | 13.94 | 17.71 | 16.47 |
| ETNK2        | 15.98 | 16.26 | 15.31 | 15.18 | 13.78 | 13.95 | 11.52 | 12.87 |
| UCHL3        | 10.6  | 11.04 | 12.2  | 10.38 | 12.58 | 13.95 | 15.63 | 14.58 |
| PAFAH1B2     | 13.62 | 11.94 | 13.45 | 14.02 | 14.14 | 13.95 | 17.15 | 14.82 |
| TRMT6        | 12    | 11.84 | 13.44 | 13.9  | 15.38 | 13.95 | 19.92 | 17.82 |
| ITCH         | 12.37 | 11.28 | 14.04 | 15.68 | 14.79 | 13.95 | 20.9  | 17.83 |
| UBN1         | 14.49 | 13.61 | 14.18 | 14.46 | 14.45 | 13.96 | 13.66 | 14.35 |
| EPB41L2      | 15.7  | 15.45 | 15.71 | 17.04 | 15.85 | 13.96 | 17.99 | 16.43 |
| PILRB        | 10.95 | 10.84 | 10.44 | 12.38 | 13.74 | 13.97 | 19.63 | 15.71 |

|           |       |       |       |       |       |       |       |       |
|-----------|-------|-------|-------|-------|-------|-------|-------|-------|
| CHTF18    | 12.78 | 12.03 | 13.11 | 11.38 | 12.05 | 13.98 | 11.07 | 11.09 |
| BLOC1S4   | 12.72 | 14.48 | 13.59 | 11.73 | 13.01 | 13.98 | 11.08 | 11.36 |
| RAB11FIP3 | 12.89 | 12.78 | 13.26 | 14.07 | 13.4  | 13.98 | 12.32 | 12.5  |
| LRRC14    | 11.84 | 12.09 | 12.19 | 12.03 | 13.14 | 13.98 | 11.94 | 12.72 |
| PANX1     | 13.18 | 12.53 | 13.08 | 14.16 | 14.33 | 13.98 | 16.06 | 14.82 |
| VRK3      | 12.85 | 13.47 | 13.39 | 12.85 | 12    | 13.99 | 11.2  | 12.12 |
| IRF1      | 16.58 | 15.58 | 15.35 | 14.27 | 12.86 | 13.99 | 12.58 | 12.65 |
| CASP2     | 16.32 | 15.6  | 15.82 | 15.96 | 14.63 | 13.99 | 15.86 | 15.66 |
| C6orf1    | 12.66 | 12.68 | 10.57 | 11.71 | 14.3  | 14    | 12.6  | 11.98 |
| NUP58     | 12.93 | 11.21 | 13.1  | 15.64 | 13.59 | 14.01 | 18.89 | 15.7  |
| FAM91A1   | 12.28 | 11.15 | 13.37 | 16.46 | 15.39 | 14.01 | 23.48 | 20.03 |
| POP4      | 11.36 | 12.31 | 11.69 | 11.7  | 13.69 | 14.02 | 13.12 | 13.03 |
| SPAG9     | 11.7  | 9.8   | 12.87 | 14.62 | 14.18 | 14.02 | 17.55 | 15.97 |
| MCAT      | 10.95 | 11.59 | 9.76  | 9.77  | 13.34 | 14.03 | 10.85 | 9.02  |
| ZFYVE27   | 14.28 | 14.02 | 13.15 | 13.52 | 14.89 | 14.03 | 14.08 | 14.63 |
| CEL       | 16.04 | 15.77 | 15.26 | 14.19 | 12.97 | 14.04 | 12.9  | 12.45 |
| ABHD4     | 14.46 | 15.36 | 14.69 | 13.99 | 14.48 | 14.04 | 13.68 | 12.64 |
| UGT1A6    | 8.68  | 9.05  | 10.1  | 9.67  | 13.27 | 14.04 | 16.51 | 12.88 |
| RALA      | 12.44 | 13.05 | 13.49 | 13.9  | 15.1  | 14.04 | 19.22 | 15.72 |
| ANLN      | 12.87 | 10.68 | 13.54 | 15.12 | 14.57 | 14.04 | 23.35 | 19.53 |
| PPFIA1    | 13.02 | 12.09 | 14.02 | 14.7  | 15.28 | 14.05 | 16.27 | 14.9  |
| HERC2     | 12.87 | 12.73 | 12.79 | 14.47 | 14.16 | 14.05 | 16.2  | 15.56 |
| RPP30     | 13.91 | 11.91 | 13.68 | 15.11 | 14.82 | 14.05 | 17.27 | 16.2  |
| HDDC3     | 13.11 | 17.6  | 15.06 | 14.59 | 13.89 | 14.06 | 12.24 | 13.55 |
| TF2       | 13.41 | 11.29 | 12.85 | 14    | 16.02 | 14.08 | 19.18 | 16.79 |
| ORMDL1    | 11.55 | 10.24 | 12.13 | 13.36 | 13.45 | 14.08 | 22.84 | 16.79 |
| MAFK      | 11.9  | 11.97 | 12.54 | 11.65 | 14.2  | 14.09 | 11.79 | 12.24 |
| ZPR1      | 12.1  | 12.72 | 12.23 | 11.85 | 15.51 | 14.1  | 14.61 | 13.27 |
| SMNDC1    | 13.75 | 13.13 | 13.96 | 15.83 | 17.93 | 14.1  | 18.23 | 16.7  |
| SMAD5     | 11.3  | 10.01 | 13.53 | 16.05 | 15.42 | 14.1  | 25.52 | 21.21 |
| EP400     | 12.93 | 13.17 | 12.83 | 13.81 | 13.26 | 14.11 | 13.33 | 13.78 |
| SIPA1     | 15.98 | 15.73 | 15.06 | 13.81 | 12.15 | 14.12 | 10.04 | 11.54 |
| POLR2D    | 12.07 | 13.2  | 11.56 | 12.79 | 15.34 | 14.12 | 13.81 | 14.92 |
| C7orf26   | 14.84 | 16.57 | 15.42 | 14.34 | 14.31 | 14.13 | 12.06 | 12.44 |
| SPECC1L   | 15.03 | 14.26 | 15.12 | 15.25 | 15.79 | 14.13 | 15.36 | 15.33 |
| C6orf89   | 13.88 | 13.59 | 13.24 | 13.47 | 14.98 | 14.13 | 15.14 | 15.92 |
| SPEN      | 14.42 | 13.7  | 15.59 | 16.78 | 14.24 | 14.13 | 17.24 | 16.47 |
| SEH1L     | 12.22 | 11.73 | 13.48 | 13.73 | 13.67 | 14.14 | 16.95 | 14.92 |
| MAPRE3    | 15.15 | 16.58 | 13.6  | 12.44 | 13.84 | 14.15 | 13.95 | 12.95 |
| SETD5     | 14.74 | 13.85 | 16.3  | 17.58 | 13.82 | 14.15 | 17.26 | 16.78 |
| PKP4      | 12.57 | 13.02 | 13.25 | 14.21 | 14.27 | 14.16 | 16.6  | 16.49 |
| HTATIP2   | 14.38 | 14.33 | 14.3  | 15.23 | 14.51 | 14.17 | 15.29 | 14.26 |
| TEX10     | 12.98 | 11.2  | 13.69 | 13.29 | 15.77 | 14.17 | 16.91 | 15.69 |
| FAM131A   | 14.94 | 14.65 | 13.24 | 12.71 | 13.74 | 14.18 | 10.53 | 12.13 |
| FAM21C    | 11.85 | 10.42 | 12.57 | 12.8  | 14.4  | 14.18 | 15.27 | 13.07 |
| MAPKAPK5  | 11.85 | 12.42 | 13.35 | 12.43 | 14.61 | 14.18 | 14.64 | 13.16 |
| TMEM42    | 14.61 | 17.48 | 15.23 | 14.64 | 16.04 | 14.18 | 12.88 | 15.21 |
| RCL1      | 11.87 | 12.32 | 13.22 | 12.73 | 15.41 | 14.19 | 15.41 | 14.73 |
| FAM20B    | 11.35 | 11.23 | 13.22 | 14.07 | 14.43 | 14.19 | 16.84 | 15.81 |
| CCDC94    | 16.36 | 14.97 | 14.18 | 13.05 | 13.55 | 14.2  | 10.77 | 11.8  |
| ZBTB45    | 14.91 | 15.49 | 14.43 | 13.73 | 12.9  | 14.21 | 9.96  | 10.48 |
| VPS39     | 14.2  | 14.72 | 13.89 | 15    | 14.52 | 14.21 | 15.57 | 15.44 |
| DHRS7     | 13.36 | 15.14 | 14.79 | 14.86 | 14.43 | 14.22 | 15.78 | 15.68 |
| MRPS9     | 12.95 | 12.09 | 14.03 | 12.66 | 14.84 | 14.22 | 16.87 | 16.82 |
| SNX14     | 13.35 | 12.39 | 14.15 | 15.58 | 13.94 | 14.22 | 20.95 | 18.64 |
| GTF2F2    | 13.18 | 11.37 | 13.22 | 13.44 | 14.52 | 14.22 | 19.05 | 19.07 |
| DHRS4     | 14.88 | 14.05 | 14.59 | 14.1  | 11.59 | 14.23 | 13.11 | 9.39  |
| ARHGAP35  | 13.73 | 12.9  | 13.66 | 13.95 | 13.92 | 14.23 | 14.58 | 14.07 |
| GCAT      | 14.45 | 15.14 | 14.44 | 13.36 | 14.68 | 14.24 | 11.24 | 11.65 |
| KANSL1    | 13.72 | 12.68 | 14.24 | 15.2  | 13.5  | 14.24 | 14.65 | 15.19 |
| AP5Z1     | 12.77 | 13.07 | 12.31 | 12.29 | 14.17 | 14.25 | 11.66 | 11.88 |
| NLGN2     | 14.27 | 15.53 | 14.71 | 14.48 | 14    | 14.25 | 13    | 14.23 |
| FBXO21    | 13.16 | 13.47 | 13.92 | 13.27 | 14.22 | 14.25 | 16.2  | 14.46 |
| SWI5      | 16.56 | 14.2  | 14.28 | 14.24 | 16.42 | 14.25 | 13.7  | 15.03 |
| DUSP11    | 16.28 | 15.19 | 14.92 | 16.63 | 17.34 | 14.25 | 20.61 | 18.42 |
| ADNP2     | 12.77 | 12.57 | 13.58 | 13.46 | 14.67 | 14.26 | 15.98 | 14.25 |
| GLA       | 12.66 | 12.33 | 13.23 | 12.81 | 13.38 | 14.26 | 12.88 | 14.41 |
| ABCE1     | 12.63 | 12.6  | 12.85 | 13.63 | 15.61 | 14.26 | 21.5  | 16.89 |
| AP3M1     | 12.99 | 12.14 | 14.83 | 14.52 | 15.58 | 14.26 | 19.08 | 17.62 |
| TDP2      | 12.57 | 11.65 | 12.84 | 14.1  | 14.59 | 14.26 | 18.91 | 18.29 |
| MED18     | 14.26 | 14.42 | 14.58 | 14.18 | 15.15 | 14.27 | 13.64 | 14.98 |
| GGA3      | 13.79 | 14.59 | 13.79 | 14.23 | 14.74 | 14.27 | 14.5  | 15.57 |
| PABPC1L   | 10.95 | 9.93  | 11.97 | 13.75 | 12.66 | 14.27 | 21.08 | 18.57 |
| MIEF1     | 13.59 | 13.03 | 13.29 | 13.53 | 15.27 | 14.28 | 14.19 | 14.56 |
| MAGED4B   | 17.03 | 17.59 | 16.66 | 15.77 | 12.96 | 14.29 | 11.22 | 13.81 |
| ATF6      | 14.85 | 14.9  | 16.04 | 17.24 | 15.09 | 14.29 | 17.16 | 15.04 |
| PCED1A    | 16.04 | 16.45 | 14.7  | 16.53 | 15.06 | 14.3  | 14.26 | 16.12 |
| ZNHIT2    | 13.05 | 14.02 | 13.98 | 12.24 | 12.95 | 14.31 | 9.89  | 10.86 |
| MIER2     | 12.73 | 13.21 | 12.61 | 12.22 | 12.52 | 14.31 | 10.52 | 11.76 |
| PYCR1     | 14.62 | 14.37 | 12.73 | 12.2  | 13.08 | 14.31 | 10.92 | 12.43 |
| TERF2     | 13.45 | 14.3  | 13.65 | 13.84 | 14.79 | 14.31 | 15.06 | 14.08 |
| AVP1      | 13.58 | 13.82 | 14.22 | 11.59 | 13.89 | 14.32 | 12.21 | 11.64 |
| STK16     | 13.63 | 14.24 | 13.2  | 13.45 | 14.61 | 14.33 | 12    | 14.09 |
| PDE6D     | 12.39 | 14.53 | 12.63 | 13.75 | 14.41 | 14.33 | 14.61 | 16.22 |
| INTS8     | 12.99 | 12.02 | 14.21 | 15.79 | 14.73 | 14.33 | 19.72 | 17.01 |

|              |       |       |       |       |       |       |       |       |
|--------------|-------|-------|-------|-------|-------|-------|-------|-------|
| LRP12        | 12.76 | 12.33 | 14.09 | 16.5  | 15.42 | 14.33 | 19.52 | 17.82 |
| RABL2B       | 14.3  | 13.89 | 14.22 | 15.26 | 14.18 | 14.34 | 16.13 | 15.12 |
| C1orf123     | 14.63 | 13.62 | 14.34 | 13.38 | 17.21 | 14.35 | 15.85 | 14.79 |
| ARHGEF16     | 15.71 | 15.65 | 14.46 | 14.16 | 13.8  | 14.36 | 11.58 | 12.75 |
| SFSWAP       | 14.82 | 13.75 | 14.28 | 14.08 | 15.19 | 14.36 | 14.33 | 14.97 |
| DNTTIP2      | 14.21 | 14.33 | 15.77 | 15.41 | 16.17 | 14.36 | 20.91 | 18.59 |
| FXR2         | 14.19 | 14.98 | 14.1  | 12.49 | 13.74 | 14.37 | 11.95 | 14.3  |
| ZNRD1        | 15.21 | 15.7  | 14.03 | 13.55 | 13.67 | 14.37 | 13.01 | 14.36 |
| KLHDC2       | 12.15 | 13.62 | 15.01 | 13.88 | 14.49 | 14.37 | 14.75 | 14.88 |
| SAMHD1       | 20.87 | 20.77 | 20.99 | 21.83 | 15.41 | 14.37 | 18.23 | 15.41 |
| DNAJC10      | 13.07 | 13.36 | 15.05 | 17.59 | 15.83 | 14.37 | 23.5  | 21.73 |
| FBXO25       | 11.77 | 13.08 | 12.04 | 12.28 | 15.29 | 14.38 | 16.76 | 16.24 |
| CHSY1        | 17.15 | 16.45 | 17.4  | 18.24 | 14.39 | 14.39 | 16.08 | 16.27 |
| KIAA0196     | 12.79 | 12.13 | 13.97 | 15.04 | 14.58 | 14.39 | 19.63 | 17.13 |
| SRP19        | 12.98 | 14.36 | 13.45 | 14.87 | 16.17 | 14.39 | 20.5  | 17.36 |
| SETD1A       | 13.8  | 13.71 | 13.33 | 14.02 | 14.12 | 14.4  | 12.5  | 14.24 |
| MRPL30       | 12.01 | 11.08 | 12.67 | 12.91 | 13.6  | 14.4  | 14.84 | 14.47 |
| ADGRL1       | 15.27 | 15.79 | 14.59 | 14.65 | 13.95 | 14.4  | 12.55 | 14.49 |
| LOC107987001 | 14.09 | 11.94 | 12.98 | 16.37 | 15.17 | 14.4  | 16.73 | 16.87 |
| ACAD10       | 13.45 | 14.17 | 13.27 | 13.04 | 14.5  | 14.41 | 13.69 | 13.51 |
| SULT1A4      | 3.48  | 9.72  | 13.9  | 14.05 | 6.66  | 14.42 | 13.21 | 13.03 |
| DENND4B      | 14.84 | 15.11 | 15.16 | 15.13 | 13.89 | 14.42 | 14.18 | 14.04 |
| IDH3A        | 12.2  | 11.45 | 12.67 | 14.14 | 15.15 | 14.42 | 18.11 | 14.99 |
| KCNMA1       | 10.02 | 10.88 | 11.61 | 10.27 | 13.77 | 14.43 | 12.44 | 12.31 |
| ABCC5        | 11.87 | 11.14 | 12.1  | 13.17 | 14.84 | 14.43 | 18.69 | 18.16 |
| NACAD        | 14.78 | 15.78 | 13.73 | 13.44 | 13.59 | 14.44 | 10.95 | 12.87 |
| MLF1         | 13.33 | 12.21 | 12.64 | 14.22 | 12.91 | 14.44 | 14.91 | 14.33 |
| PUM2         | 11.86 | 11.04 | 14.39 | 16.79 | 14.5  | 14.44 | 22.09 | 19.14 |
| ZNF385A      | 14.37 | 15.27 | 13.56 | 13.22 | 14.8  | 14.45 | 10.95 | 13.85 |
| CSF1         | 16.56 | 16.92 | 15.67 | 16.87 | 14.69 | 14.45 | 13.42 | 14.19 |
| TMEM57       | 14.12 | 12.91 | 13.88 | 15.07 | 14.09 | 14.45 | 16.74 | 15.07 |
| CAMK2G       | 13.76 | 13.59 | 13.46 | 13.79 | 15.86 | 14.45 | 15.8  | 15.56 |
| CGGBP1       | 13.58 | 12.7  | 14.71 | 17.11 | 15.15 | 14.45 | 22.81 | 19.87 |
| TSPAN1       | 14.17 | 14.57 | 13.43 | 11.43 | 14.15 | 14.47 | 12.16 | 13.34 |
| NSF          | 13.41 | 12.4  | 13.58 | 14.68 | 16.05 | 14.47 | 19.09 | 16.23 |
| NRARP        | 15.88 | 15.64 | 15.36 | 14.24 | 13.72 | 14.48 | 13.02 | 13.77 |
| RAB3GAP1     | 13.4  | 12.38 | 13.87 | 15.59 | 15.14 | 14.48 | 17.61 | 17.18 |
| ADGRL2       | 16.98 | 14.2  | 17.97 | 19.87 | 14.34 | 14.48 | 20.68 | 17.5  |
| HJURP        | 12.06 | 9.82  | 11.44 | 11.94 | 15.01 | 14.49 | 15.93 | 13.97 |
| FAM219A      | 14.72 | 14.72 | 14.63 | 14.55 | 15.33 | 14.49 | 12.11 | 13.99 |
| GSE1         | 16.18 | 14.53 | 16.14 | 15.64 | 14.05 | 14.49 | 15.14 | 15.42 |
| TBCC         | 17.26 | 16.38 | 16.25 | 14.84 | 13.71 | 14.5  | 12.76 | 12.69 |
| FAM21A       | 12.47 | 12.94 | 12.52 | 13.83 | 15.39 | 14.5  | 16.47 | 15.83 |
| ZBED1        | 16.07 | 16.14 | 15.63 | 14.93 | 13.63 | 14.51 | 12.29 | 12.83 |
| THOC6        | 14.2  | 14.7  | 14.12 | 13.05 | 15.82 | 14.51 | 10.45 | 14.16 |
| TSEN15       | 15.58 | 13.98 | 16.1  | 15.69 | 13.62 | 14.51 | 17.8  | 16.73 |
| EZH2         | 15.07 | 14.47 | 15.05 | 16.47 | 17.71 | 14.51 | 18.88 | 17.64 |
| LOC107987034 | 14.05 | 11.04 | 13.81 | 13.1  | 16.13 | 14.52 | 8.97  | 15.49 |
| ATG2A        | 13.92 | 13.93 | 14.29 | 13.13 | 13.91 | 14.53 | 11.55 | 12.56 |
| PELO         | 13.3  | 14.03 | 14.42 | 13.56 | 14.2  | 14.53 | 14.16 | 14.48 |
| SLC35B4      | 12.08 | 10.9  | 12.27 | 13.66 | 14.19 | 14.53 | 17.32 | 16.08 |
| COG5         | 13.45 | 12.61 | 14.24 | 14.84 | 15.92 | 14.53 | 20.15 | 17.82 |
| VWA9         | 14.95 | 15.48 | 14.67 | 15.35 | 15.47 | 14.55 | 15.88 | 15.64 |
| GALNT1       | 14.92 | 13.4  | 17.2  | 19.61 | 15.47 | 14.55 | 24.55 | 20.91 |
| PLEKHM1      | 12.8  | 12.88 | 12.81 | 13.58 | 13.38 | 14.56 | 13.97 | 14.33 |
| NAGA         | 14.57 | 15.53 | 14.16 | 15.13 | 14.01 | 14.57 | 12.29 | 12.54 |
| GEMIN5       | 14.15 | 13.65 | 13.56 | 13.65 | 15.41 | 14.57 | 15.9  | 14.47 |
| CALCOCO1     | 13.99 | 15.74 | 14.52 | 13.33 | 15.21 | 14.57 | 14.74 | 15.54 |
| SRGAP2       | 15.45 | 14.8  | 17.2  | 17.21 | 14.68 | 14.57 | 16.22 | 15.79 |
| WDR70        | 13.91 | 12.99 | 13.55 | 14.7  | 13.85 | 14.59 | 14.28 | 13.87 |
| SLC25A26     | 11.08 | 12.26 | 13.7  | 11.63 | 13.95 | 14.6  | 12.67 | 13.14 |
| FBXO17       | 14.11 | 13.46 | 12.65 | 13.09 | 13.03 | 14.62 | 12.47 | 12.87 |
| COX15        | 12.2  | 12.81 | 12.69 | 13.02 | 13.01 | 14.62 | 16.07 | 13.44 |
| NUDT3        | 11.77 | 11.17 | 12.52 | 11.47 | 12.41 | 14.62 | 14.15 | 14.37 |
| MAP4K4       | 14.46 | 14.05 | 14.93 | 16.04 | 15.32 | 14.62 | 16.84 | 16.19 |
| ZNF394       | 14.18 | 13.43 | 14.17 | 15.23 | 14.58 | 14.63 | 13.05 | 13.2  |
| SAP130       | 14.24 | 14.07 | 14.24 | 13.98 | 14.59 | 14.63 | 13.81 | 14.08 |
| SLC33A1      | 13.06 | 12.52 | 14.68 | 14.09 | 13.31 | 14.63 | 16.41 | 15.33 |
| NFE2L2       | 13.89 | 12.65 | 15.67 | 17.58 | 15.18 | 14.63 | 21.64 | 18.57 |
| SLC39A11     | 14.73 | 15.3  | 14.86 | 16.1  | 13.94 | 14.64 | 15.02 | 14.67 |
| ASMTL        | 14.26 | 14.29 | 14.54 | 13    | 15.23 | 14.65 | 12.39 | 12.64 |
| NUBP1        | 13.02 | 14.1  | 14.42 | 14.06 | 14.14 | 14.65 | 14.18 | 14.3  |
| LSG1         | 12.71 | 13.71 | 14.16 | 13.01 | 16.47 | 14.65 | 16.3  | 15.65 |
| TFB2M        | 12.77 | 10.68 | 12.45 | 12.74 | 14.47 | 14.65 | 18    | 17.52 |
| ACP5         | 16.03 | 17.31 | 15.85 | 15.42 | 12.12 | 14.66 | 10.92 | 11.43 |
| CLASRP       | 13.43 | 14.27 | 12.72 | 12.48 | 14.77 | 14.66 | 12.15 | 12.41 |
| RAB11FIP5    | 14.4  | 14.38 | 13.39 | 12.32 | 13.25 | 14.66 | 11.63 | 12.44 |
| METTL17      | 11.87 | 13.7  | 11.89 | 12.41 | 14.72 | 14.66 | 15.77 | 14.12 |
| DPCD         | 15.33 | 15.23 | 16.05 | 14.66 | 14.59 | 14.67 | 11.87 | 13.29 |
| TRIM26       | 15.21 | 15.25 | 15.55 | 15.07 | 14.04 | 14.68 | 12.2  | 13    |
| CCHCR1       | 16.08 | 14.92 | 15.57 | 13.65 | 15.59 | 14.68 | 13.3  | 14.49 |
| TXNDC9       | 12.88 | 13.72 | 14.55 | 14.97 | 14.15 | 14.68 | 20.61 | 16.26 |
| NAA40        | 14.02 | 14.14 | 13.17 | 15.33 | 13.58 | 14.69 | 15.58 | 14.83 |

|              |       |       |       |       |       |       |       |       |
|--------------|-------|-------|-------|-------|-------|-------|-------|-------|
| ZNF335       | 12.86 | 12.12 | 12.22 | 11.84 | 13.71 | 14.7  | 14.87 | 13.98 |
| LOC102724993 | 13.11 | 15.37 | 13.59 | 16.26 | 16.5  | 14.7  | 19.05 | 19.85 |
| RPTOR        | 15.95 | 15.03 | 15    | 14.6  | 14.16 | 14.71 | 12.19 | 12.92 |
| SWAP70       | 12.8  | 11.15 | 13.75 | 15.1  | 16.3  | 14.71 | 21.69 | 18.56 |
| COG8         | 16.58 | 16.94 | 15.92 | 16.4  | 14.82 | 14.72 | 12.59 | 13.9  |
| PLLP         | 17.24 | 18.92 | 15.01 | 15.67 | 15.82 | 14.72 | 12.62 | 15.39 |
| SMAP2        | 16.21 | 15.83 | 17.61 | 15.24 | 15.33 | 14.72 | 15.57 | 15.69 |
| FAM98A       | 12.44 | 12.13 | 14.13 | 15.23 | 16.71 | 14.72 | 19.14 | 17.25 |
| SPTBN2       | 13.06 | 13.2  | 12.7  | 12.61 | 13.61 | 14.73 | 11.46 | 12.56 |
| IMMP2L       | 12.39 | 12.33 | 12.8  | 12.39 | 14.9  | 14.73 | 14.15 | 14.36 |
| ZNF561       | 12.06 | 11.95 | 13.21 | 13.41 | 16.88 | 14.73 | 22.16 | 18.36 |
| MKKS         | 12.85 | 13.07 | 13.74 | 14.7  | 14.95 | 14.74 | 18.14 | 14.79 |
| LYRM4        | 17.22 | 16.46 | 15.41 | 15.87 | 16.82 | 14.74 | 17.38 | 19.02 |
| ARMCX6       | 16.18 | 18.12 | 17.35 | 15.85 | 16.04 | 14.75 | 15.31 | 16.14 |
| CDKN3        | 14.31 | 14.61 | 14.25 | 13.43 | 16.42 | 14.76 | 20.91 | 17.89 |
| LGR5         | 16.38 | 15.76 | 17.64 | 19.56 | 14.42 | 14.76 | 20.36 | 19.66 |
| SMARCA1      | 15.4  | 14.76 | 17.52 | 18.5  | 15.09 | 14.76 | 21.72 | 19.82 |
| TNFRSF25     | 12.39 | 10.58 | 10.28 | 13.34 | 12.11 | 14.77 | 16.87 | 15.13 |
| CELF1        | 15.1  | 14.67 | 17.59 | 17.31 | 17.23 | 14.77 | 18.86 | 18.82 |
| TUSC1        | 13.94 | 13.98 | 13.29 | 12.51 | 13.21 | 14.78 | 10.32 | 11.14 |
| ENKD1        | 14.77 | 14.48 | 15.9  | 11.95 | 13.64 | 14.78 | 12.76 | 12.35 |
| NTRK2        | 14.54 | 13.75 | 16.33 | 16.78 | 14.48 | 14.78 | 18.01 | 17.21 |
| PNN          | 12.09 | 10.81 | 13.82 | 17.05 | 15.1  | 14.8  | 26.51 | 20.08 |
| PSMD9        | 13.75 | 14.63 | 13.03 | 13.74 | 16.28 | 14.81 | 13.9  | 14.29 |
| SPAG5        | 13.79 | 12.36 | 13.72 | 12.54 | 14.77 | 14.81 | 16.01 | 15.32 |
| SLC39A9      | 15.02 | 13.6  | 13.88 | 14.27 | 16.14 | 14.81 | 16.43 | 15.94 |
| APOBEC3B     | 13.86 | 13.48 | 13.99 | 11.6  | 14.02 | 14.82 | 14.12 | 11.84 |
| TOR1B        | 13.76 | 14.22 | 14.55 | 14.69 | 14.88 | 14.82 | 15.63 | 15.2  |
| RBFOX2       | 14.15 | 14.36 | 14.09 | 15.68 | 14.5  | 14.82 | 16.27 | 15.41 |
| ACBD3        | 14.14 | 11.9  | 15.41 | 17.5  | 15.18 | 14.82 | 21.83 | 18.99 |
| CSTF3        | 17.27 | 16.68 | 17.75 | 19.34 | 18.71 | 14.82 | 21.41 | 20.04 |
| PIGP         | 14.69 | 11.89 | 14.75 | 16.19 | 15.18 | 14.83 | 18.58 | 14.51 |
| FECH         | 15.58 | 12.85 | 15.63 | 15.33 | 17.09 | 14.83 | 15.95 | 15.37 |
| PHYH         | 15.28 | 13.61 | 14.69 | 15.06 | 15.84 | 14.83 | 15.78 | 15.44 |
| ASUN         | 10.76 | 10.84 | 14.12 | 14.25 | 15.75 | 14.83 | 19.6  | 18.58 |
| ZNF664       | 15.61 | 13.98 | 16.25 | 19.37 | 15.75 | 14.83 | 22.49 | 19.88 |
| OTUB2        | 12.06 | 12.09 | 12.74 | 11.52 | 15.73 | 14.84 | 15.04 | 14.6  |
| FOCAD        | 14.43 | 14.08 | 14.72 | 14.62 | 14.37 | 14.84 | 15.75 | 15.83 |
| IWS1         | 12.9  | 12.43 | 14.82 | 15.42 | 15.41 | 14.84 | 18.86 | 16.52 |
| TXNDC11      | 15.57 | 15.58 | 14.81 | 15.76 | 14.27 | 14.85 | 13.63 | 14.47 |
| LOC730098    | 13.09 | 11.47 | 13.61 | 12.01 | 11.72 | 14.86 | 12.15 | 10.98 |
| TMEM39B      | 15.91 | 15.38 | 15.74 | 13.56 | 14.93 | 14.86 | 13.72 | 12.7  |
| PICK1        | 13.55 | 14.71 | 14.23 | 13.2  | 16.26 | 14.86 | 13.23 | 15.05 |
| VEGFC        | 17.07 | 15.76 | 16.93 | 17.67 | 14.44 | 14.87 | 15.62 | 14.67 |
| BCL2L13      | 14.37 | 14.51 | 14.07 | 14.34 | 14.96 | 14.87 | 14.54 | 14.8  |
| GNE          | 13.36 | 12.71 | 13.58 | 14.1  | 14.91 | 14.88 | 15.31 | 14.89 |
| GATS         | 12.52 | 14.64 | 14.09 | 14.65 | 13.44 | 14.88 | 15.31 | 15.41 |
| METAP1       | 15.34 | 14.51 | 15.11 | 16.04 | 15.34 | 14.88 | 17.95 | 17.23 |
| MICAL1       | 15.01 | 15.13 | 14.64 | 13.73 | 14.03 | 14.89 | 13.5  | 13.47 |
| MCEP2        | 14.31 | 14.74 | 14.81 | 14.5  | 14.25 | 14.89 | 13.2  | 13.52 |
| SRPK1        | 11.82 | 11.13 | 13.22 | 15.39 | 16.46 | 14.89 | 21.38 | 18.64 |
| DPAGT1       | 14.15 | 14.14 | 13.7  | 12.41 | 15.79 | 14.9  | 15.21 | 15.91 |
| COX16        | 14.68 | 15.26 | 15.01 | 14.98 | 14.52 | 14.9  | 17.78 | 16.3  |
| MRPL48       | 13.44 | 13.95 | 15.13 | 13.89 | 15.78 | 14.91 | 16.2  | 13.78 |
| SHISA4       | 17.29 | 17.47 | 16.88 | 17.39 | 16.78 | 14.91 | 11.91 | 14.52 |
| MTRR         | 13.54 | 12.18 | 15.54 | 16.01 | 16.29 | 14.91 | 21.84 | 18.91 |
| PANK3        | 11.86 | 11.87 | 13.56 | 15.14 | 13.84 | 14.91 | 21.87 | 20.02 |
| TCTA         | 15.45 | 14.67 | 14.6  | 15.01 | 16.33 | 14.92 | 14.5  | 14.82 |
| TIMM17A      | 12.96 | 12.86 | 13.6  | 15.36 | 15.91 | 14.92 | 19.61 | 20.36 |
| CENPT        | 13.01 | 12.3  | 12.49 | 12.87 | 16.95 | 14.93 | 16.42 | 13.57 |
| KCTD10       | 14.4  | 14.72 | 15.09 | 14.68 | 16.4  | 14.93 | 15.37 | 15.82 |
| MSI2         | 12.72 | 11.9  | 14.35 | 16.81 | 16.46 | 14.93 | 21.35 | 19.54 |
| CCDC14       | 10.05 | 9.69  | 12.37 | 15.88 | 13.39 | 14.93 | 27.5  | 22.77 |
| PINK1        | 12.82 | 14.32 | 13.36 | 12.66 | 14.54 | 14.94 | 12.57 | 13.55 |
| ATAD3B       | 12.64 | 10.2  | 11.02 | 12.82 | 14.2  | 14.95 | 14.6  | 12.59 |
| HADH         | 12.87 | 13.19 | 13.31 | 12    | 15.48 | 14.95 | 13.93 | 13.85 |
| SIN3A        | 15.72 | 15.65 | 16.01 | 16.92 | 14.95 | 14.95 | 16.77 | 17.78 |
| IKBKAP       | 13.81 | 12.7  | 13.56 | 14.97 | 15.02 | 14.96 | 18.34 | 16.35 |
| RFX5         | 13.56 | 14.5  | 14.21 | 14.78 | 15.63 | 14.96 | 17.35 | 16.64 |
| 44260        | 14.32 | 13.89 | 15.99 | 16.54 | 15.61 | 14.96 | 18.34 | 17.74 |
| C8orf58      | 19.18 | 18.35 | 18.88 | 19.54 | 14.99 | 14.97 | 14.53 | 13.79 |
| TMEM138      | 11.96 | 11.23 | 11.67 | 13.21 | 14.88 | 14.97 | 14.56 | 15.09 |
| U2SURP       | 13.03 | 13.29 | 15.35 | 17.9  | 14.4  | 14.97 | 24.77 | 21.34 |
| IRF2BP1      | 15.72 | 14.97 | 13.65 | 13.48 | 14.43 | 14.99 | 9.77  | 11.44 |
| NAA60        | 14.89 | 14.31 | 13.57 | 14.07 | 15.34 | 14.99 | 11.99 | 13.81 |
| CEP104       | 14.62 | 14.09 | 14.22 | 15.16 | 15.06 | 14.99 | 16.04 | 14.84 |
| PPP4R1       | 15.07 | 15.15 | 15.98 | 16.21 | 16.01 | 14.99 | 18.42 | 15.93 |
| TRNP1        | 16    | 16.11 | 13.02 | 14.09 | 13.53 | 15    | 11.2  | 12.78 |
| TRAM2        | 14.92 | 14.77 | 15.83 | 16.46 | 15.75 | 15    | 16.97 | 15.94 |
| GRWD1        | 12.89 | 13.65 | 13.49 | 12.19 | 15.12 | 15.01 | 11.11 | 12.79 |
| KAT5         | 13.93 | 14.51 | 13.53 | 11.94 | 13.69 | 15.01 | 12.92 | 13.27 |
| RAB26        | 12.39 | 15.1  | 12.58 | 12.35 | 11.42 | 15.02 | 12.47 | 14.58 |
| POLR3GL      | 13.83 | 14.22 | 15.18 | 15.3  | 15.6  | 15.03 | 16.44 | 18.53 |
| EIF2AK2      | 19.44 | 19.35 | 23.63 | 26.01 | 16.22 | 15.03 | 21.97 | 19.45 |
| GPR137B      | 14.27 | 14.72 | 14.74 | 16.47 | 15.33 | 15.05 | 14.62 | 15.73 |
| GNB1L        | 13.63 | 14.36 | 12.71 | 11.34 | 13.33 | 15.06 | 11.25 | 11.72 |

|                 |       |       |       |       |       |       |       |       |
|-----------------|-------|-------|-------|-------|-------|-------|-------|-------|
| FZR1            | 15.54 | 15.74 | 14.47 | 13.26 | 14.48 | 15.07 | 11.09 | 12.28 |
| PRSS12          | 14.09 | 12.8  | 13.78 | 14.76 | 15.93 | 15.07 | 16.42 | 15.96 |
| STRIP1          | 13.64 | 13.93 | 13.7  | 13.21 | 14.36 | 15.08 | 15.02 | 14.4  |
| MCMBP           | 14.62 | 14.69 | 14.98 | 15.01 | 15.55 | 15.08 | 17.02 | 14.65 |
| FZD1            | 17.62 | 16.49 | 16.87 | 16.85 | 14.08 | 15.09 | 13.18 | 13.92 |
| EPN2            | 15.44 | 15.15 | 15.07 | 15.15 | 15.58 | 15.09 | 15.12 | 15.1  |
| CALCOCO2        | 14.77 | 15.23 | 16    | 16.12 | 16.59 | 15.09 | 19.28 | 18.3  |
| POLR1E          | 14.2  | 14.89 | 14.15 | 14.13 | 16.71 | 15.1  | 16.61 | 15.56 |
| C12orf65        | 14.78 | 14.69 | 13.11 | 16.6  | 15.12 | 15.1  | 14.31 | 16.99 |
| ADRA1D          | 13.76 | 15.74 | 13.56 | 14.06 | 15.81 | 15.11 | 12.26 | 13.97 |
| GTF2H4          | 15.55 | 14.92 | 13.99 | 13.59 | 15.22 | 15.11 | 12.87 | 15.34 |
| ZCCHC9          | 16.2  | 16.14 | 18.05 | 18.09 | 17.96 | 15.11 | 22.28 | 19.29 |
| CDH5            | 14.36 | 15.28 | 15.86 | 16.62 | 16.11 | 15.12 | 16.16 | 14.92 |
| TBC1D13         | 15.82 | 16.66 | 16.41 | 15.39 | 14.49 | 15.13 | 12.6  | 15.17 |
| RBM12           | 15.18 | 14.16 | 15.22 | 15.29 | 15.81 | 15.13 | 17    | 17.2  |
| NSMCE4A         | 17.39 | 15.97 | 16.53 | 17.05 | 14.97 | 15.13 | 18.44 | 17.38 |
| MCOLN1          | 12.74 | 13.41 | 13.15 | 12.75 | 12.97 | 15.14 | 11.98 | 12.41 |
| PTCD1           | 14.95 | 14.7  | 14.43 | 13.9  | 14.54 | 15.14 | 12.63 | 13.3  |
| SSBP2           | 18.79 | 18.81 | 19.78 | 18.2  | 14.1  | 15.14 | 18.03 | 16.09 |
| RAB32           | 15.94 | 15.76 | 15.2  | 14.86 | 14.34 | 15.15 | 13.3  | 13.5  |
| TELO2           | 14.87 | 14.78 | 14.34 | 13.21 | 14.15 | 15.16 | 12.03 | 12.7  |
| TBC1D22A        | 14.91 | 15.62 | 14.54 | 15    | 16.53 | 15.17 | 13.67 | 13.34 |
| MAPK14          | 16.59 | 14.97 | 13.75 | 14.67 | 17.24 | 15.17 | 15.79 | 15.52 |
| TCEB3           | 14.59 | 14.02 | 14.67 | 15.52 | 16.2  | 15.17 | 16.58 | 15.81 |
| ANTXR1          | 19.1  | 16.69 | 17.81 | 19.32 | 16.26 | 15.17 | 18.75 | 18.09 |
| GTF3C6          | 14.3  | 13.69 | 13.33 | 14.63 | 16.79 | 15.17 | 17.75 | 18.17 |
| RHOQ            | 13.74 | 13.15 | 14.6  | 15.3  | 16.9  | 15.17 | 24.33 | 21.45 |
| POLL            | 14.56 | 13.81 | 14.07 | 14.03 | 15.1  | 15.2  | 13.47 | 13.14 |
| DNAJC14         | 16.27 | 14.75 | 15.52 | 15.69 | 16.5  | 15.2  | 15.93 | 17.15 |
| GNA13           | 12.16 | 11.51 | 14.4  | 16.44 | 14.85 | 15.2  | 21.69 | 17.84 |
| AK3             | 13.17 | 12.06 | 13.79 | 15.41 | 16.44 | 15.2  | 20.93 | 18.62 |
| TAB1            | 16.68 | 16.41 | 16.16 | 14.49 | 13.62 | 15.21 | 11.91 | 12.82 |
| MYL5            | 13.3  | 15.66 | 14.92 | 13.04 | 13.28 | 15.21 | 13.53 | 14.96 |
| LRP11           | 14.65 | 12.55 | 15.62 | 15.81 | 16    | 15.21 | 17.92 | 17.17 |
| WDR43           | 12.57 | 10.9  | 14.58 | 15.55 | 16.11 | 15.21 | 21.54 | 19.51 |
| OGG1            | 15.7  | 14.37 | 14.34 | 15.38 | 15.21 | 15.22 | 12.82 | 13.94 |
| RRP12           | 13.87 | 14.71 | 13.73 | 13.14 | 17.38 | 15.22 | 13.65 | 14.73 |
| LEPROTL1        | 14.62 | 13.15 | 14.04 | 16.03 | 15.26 | 15.23 | 17.67 | 15.93 |
| SARS2           | 14.05 | 14.71 | 14.02 | 13.53 | 14.56 | 15.24 | 12.85 | 13.44 |
| NARFL           | 14.25 | 14.04 | 13.9  | 12.24 | 13.56 | 15.25 | 11.47 | 11.52 |
| MROH1           | 13.46 | 13.42 | 12.82 | 12.51 | 13.28 | 15.25 | 12.64 | 13.71 |
| PDK2            | 15.18 | 16.39 | 15.62 | 13.78 | 14.77 | 15.26 | 12.36 | 13.44 |
| SGK1            | 17.58 | 18.43 | 18.2  | 17.82 | 15.22 | 15.26 | 17.33 | 15.7  |
| VPS26B          | 15.68 | 15.43 | 16.78 | 14.99 | 16.09 | 15.27 | 13.92 | 15.31 |
| UBE2B           | 14.16 | 14.67 | 14.75 | 15.83 | 16.72 | 15.27 | 24.24 | 19.93 |
| NQO2            | 16.6  | 18.07 | 17.45 | 15.66 | 17.39 | 15.28 | 14.85 | 13.99 |
| LZIC            | 14.84 | 14.69 | 14.04 | 16.37 | 17.44 | 15.28 | 19.98 | 18.14 |
| CTU2            | 14.94 | 14.47 | 14.17 | 12.8  | 17.03 | 15.29 | 12.18 | 13.12 |
| ULK1            | 15.28 | 14.75 | 14.11 | 13.48 | 14.28 | 15.29 | 13.13 | 13.99 |
| RFT1            | 13.93 | 15.11 | 14.5  | 14.42 | 14.27 | 15.29 | 14.1  | 14.38 |
| ABT1            | 15.32 | 16.05 | 15.29 | 15.65 | 15.46 | 15.29 | 15.44 | 14.57 |
| TOP2B           | 14.25 | 13.5  | 16.87 | 19.44 | 15.08 | 15.29 | 24.06 | 21.28 |
| NFKBIB          | 15.28 | 15.25 | 13.52 | 10.96 | 16.68 | 15.3  | 12.46 | 13.61 |
| SRPRB           | 13.55 | 14.14 | 13.03 | 12.97 | 14.28 | 15.3  | 15.72 | 14.57 |
| RUFY1           | 13.72 | 13.18 | 14.31 | 14.15 | 14.25 | 15.3  | 13.77 | 15.5  |
| C7orf55         | 15.9  | 14.49 | 14.33 | 11.83 | 14.09 | 15.31 | 9.86  | 12.26 |
| STK4            | 13.92 | 12.04 | 14.67 | 15.2  | 15.8  | 15.31 | 19.03 | 18.24 |
| SEMA3C          | 10.96 | 11.67 | 13.07 | 15.73 | 16.2  | 15.32 | 25.36 | 21.78 |
| BORCS8          | 14.72 | 15.13 | 14.25 | 12.04 | 15.01 | 15.33 | 12.23 | 13.07 |
| MED22           | 15.15 | 14.66 | 14.32 | 13.76 | 14.08 | 15.34 | 12.59 | 13.96 |
| C22orf29        | 14.25 | 14.49 | 14.45 | 14.18 | 14.83 | 15.34 | 13.74 | 15.22 |
| SETD3           | 15.98 | 16.65 | 17.22 | 17.11 | 17.36 | 15.34 | 18.9  | 17.77 |
| SLC25A37        | 14.77 | 16.1  | 15.49 | 18.05 | 16.98 | 15.35 | 19.76 | 18.1  |
| TTYH2           | 14.5  | 14.86 | 14.79 | 14.26 | 15.09 | 15.36 | 13.71 | 14.24 |
| TNC             | 26.89 | 25.62 | 23.97 | 25.55 | 14.3  | 15.36 | 14.12 | 14.56 |
| TDRKH           | 15.35 | 14.86 | 16.73 | 15.99 | 16.92 | 15.36 | 16.43 | 15.89 |
| SETDB1          | 17.36 | 16.18 | 16.21 | 16.85 | 16.83 | 15.36 | 17.26 | 16.71 |
| GPN3            | 12.54 | 13.52 | 14.56 | 15.99 | 16.37 | 15.36 | 19.98 | 18.12 |
| VAMP2           | 14.92 | 16.28 | 15.97 | 16.27 | 16.43 | 15.37 | 15.47 | 16.68 |
| TMEM167B        | 14.37 | 12.88 | 14.37 | 15.38 | 16.46 | 15.37 | 19.86 | 19.59 |
| HOXB7           | 17.59 | 20    | 18.33 | 17.61 | 16.4  | 15.38 | 14.62 | 14.56 |
| POGK            | 15.73 | 15.73 | 16.31 | 16.21 | 15.75 | 15.38 | 17.22 | 15.81 |
| KIF2A           | 13.17 | 12.44 | 16.62 | 18.54 | 15.65 | 15.38 | 25.91 | 23.1  |
| PIGC            | 16.38 | 17.29 | 16.58 | 18.49 | 17.58 | 15.39 | 18.81 | 16.78 |
| TMEM126A        | 13.42 | 12.92 | 13.85 | 13.59 | 14.58 | 15.39 | 19.23 | 16.94 |
| NAA50           | 13.61 | 12.51 | 15.47 | 16.7  | 16.95 | 15.39 | 21.68 | 19.63 |
| ANKHD1-EIF4EBP3 | 12.93 | 12.24 | 14.96 | 15.86 | 12.78 | 15.4  | 17.36 | 16.85 |
| PRADC1          | 12.86 | 15.17 | 11.66 | 12.05 | 15.75 | 15.41 | 11.43 | 12.39 |
| MKI67           | 14.62 | 12.86 | 15.84 | 15.35 | 16.53 | 15.41 | 19.87 | 18.22 |
| C10orf10        | 17.27 | 17.21 | 16    | 14.94 | 17.45 | 15.42 | 16.32 | 13.81 |
| HHLA3           | 19.32 | 19.87 | 18.7  | 18.83 | 17.43 | 15.42 | 14.63 | 17.74 |
| BRF1            | 16.12 | 16.21 | 16.04 | 14.47 | 16.26 | 15.43 | 12.33 | 12.88 |
| ENDOV           | 15.69 | 16.01 | 13.81 | 13.43 | 13.9  | 15.43 | 13.46 | 13.91 |
| CDKN1B          | 16.08 | 16.06 | 17.43 | 17.92 | 14.94 | 15.43 | 17.43 | 17.72 |

|              |       |       |       |       |       |       |       |       |
|--------------|-------|-------|-------|-------|-------|-------|-------|-------|
| IER5L        | 15.75 | 15.36 | 13.73 | 13    | 13.23 | 15.44 | 9.5   | 11    |
| BHLHE40      | 17.84 | 18.01 | 17.94 | 18.71 | 14.62 | 15.44 | 16.27 | 15.26 |
| CREB3L4      | 14.98 | 15.76 | 15.07 | 14.04 | 15.13 | 15.46 | 13.22 | 14.24 |
| LOC100996709 | 13.22 | 12.25 | 16.4  | 16    | 16.44 | 15.46 | 19.44 | 16.86 |
| HSD17B12     | 12    | 12.41 | 13.53 | 14.25 | 15.66 | 15.46 | 22.33 | 17.87 |
| NCKAP5L      | 14.86 | 15.97 | 15.63 | 14.59 | 14.99 | 15.47 | 12.45 | 14.43 |
| ACADM        | 13.47 | 12.85 | 15    | 16.45 | 15.49 | 15.47 | 22.63 | 19.73 |
| TOM1L1       | 12.75 | 13.37 | 14.12 | 15.6  | 15.93 | 15.47 | 20.37 | 20.1  |
| SRSF10       | 15.94 | 14.22 | 17.26 | 21.24 | 16.06 | 15.47 | 27.63 | 21.6  |
| RRP1B        | 13.71 | 13.77 | 14.66 | 15.45 | 16.94 | 15.48 | 16.46 | 16.72 |
| C19orf54     | 16.95 | 17.38 | 16.83 | 15.85 | 15.13 | 15.48 | 13.81 | 17.02 |
| ULBP2        | 13.89 | 13.32 | 13.96 | 13.15 | 14.69 | 15.49 | 13.62 | 15.76 |
| SLC26A6      | 15.72 | 15.38 | 15.59 | 15.77 | 15.01 | 15.49 | 14.82 | 16.44 |
| DHRS13       | 18.39 | 18.61 | 16.59 | 16.17 | 14.55 | 15.5  | 11.71 | 12.88 |
| RNASET2      | 16.1  | 17.92 | 16.28 | 15.02 | 15.98 | 15.5  | 13.53 | 13.48 |
| DYRK1B       | 14.82 | 14.75 | 13.85 | 13.92 | 14.06 | 15.5  | 10.94 | 13.85 |
| MAP3K3       | 14.87 | 15.13 | 14.36 | 14.51 | 13.94 | 15.5  | 12.69 | 14.11 |
| GLI3         | 16.7  | 16.88 | 16.8  | 17.09 | 15.27 | 15.5  | 15.85 | 15.84 |
| NUP160       | 14.86 | 13.8  | 14.84 | 15.61 | 17.18 | 15.5  | 21.17 | 18.04 |
| SESN3        | 13.26 | 13.05 | 16.28 | 19.8  | 14.89 | 15.5  | 24.68 | 23.78 |
| SMYD3        | 14.35 | 15.12 | 14.62 | 14.8  | 15.3  | 15.51 | 14.17 | 14.47 |
| TOMM70       | 12.9  | 12.13 | 14.24 | 14.96 | 16.69 | 15.51 | 21.59 | 16.58 |
| SLC12A2      | 15.96 | 15.33 | 18.26 | 20.65 | 13.96 | 15.51 | 23.08 | 21.81 |
| TRIM41       | 13.77 | 13.36 | 14.51 | 14.47 | 15.31 | 15.52 | 14.18 | 14.5  |
| TMEM11       | 15.84 | 15.39 | 15.4  | 13.52 | 14.57 | 15.53 | 14.05 | 13.35 |
| HNRNP1L      | 15.29 | 14.51 | 15.25 | 16.75 | 15.56 | 15.53 | 16.26 | 15.76 |
| RARA         | 17.5  | 18.8  | 18.37 | 16.63 | 13.19 | 15.54 | 11.48 | 13    |
| GSTT1        | 15.43 | 16.06 | 12.54 | 13.44 | 15.35 | 15.54 | 12.07 | 13.86 |
| ABL1         | 17.4  | 17.7  | 16.64 | 16.87 | 14.98 | 15.54 | 14.07 | 14.4  |
| CPT1C        | 17.74 | 20.67 | 17.99 | 17.94 | 14.63 | 15.55 | 14.3  | 14.86 |
| CRNKL1       | 16.06 | 13.92 | 16.37 | 18.01 | 16.48 | 15.55 | 19.7  | 19.02 |
| CD68         | 14.22 | 13.81 | 13.7  | 12.93 | 16.32 | 15.57 | 14.33 | 14.27 |
| ZNF274       | 15.77 | 14.34 | 13.99 | 15.69 | 15.63 | 15.57 | 16.94 | 16.83 |
| TAB2         | 15.1  | 14.5  | 18.43 | 19.38 | 16.42 | 15.58 | 22.94 | 20.04 |
| CENPM        | 17.74 | 16.71 | 16.69 | 13.84 | 14.78 | 15.59 | 12.42 | 14.29 |
| KCTD13       | 17.19 | 15.94 | 14.57 | 16.59 | 15.54 | 15.59 | 14.85 | 15.3  |
| KCNK6        | 13.62 | 13.21 | 12.82 | 13.18 | 13.94 | 15.59 | 13.51 | 15.69 |
| CLK2         | 16.93 | 15.63 | 17.03 | 16.7  | 17.94 | 15.59 | 20.45 | 18.51 |
| ITPKC        | 17.24 | 16.99 | 17.62 | 15.54 | 15.74 | 15.6  | 13.51 | 14.57 |
| ZNF672       | 17.44 | 17.33 | 16.77 | 16.86 | 15.93 | 15.61 | 12.17 | 14.5  |
| COQ5         | 16.12 | 15.94 | 16.22 | 14.91 | 15.55 | 15.61 | 15.27 | 15.91 |
| RABEPK       | 15.82 | 14.94 | 14.57 | 15.07 | 17.31 | 15.61 | 14.75 | 16.35 |
| SRGN         | 13.5  | 16.08 | 16.04 | 17.28 | 16.81 | 15.61 | 20.27 | 19.19 |
| JMJD6        | 18.33 | 17.12 | 16.73 | 17.8  | 17.05 | 15.62 | 15.68 | 15.95 |
| DROSHA       | 15.47 | 14.6  | 15.5  | 17.37 | 15.73 | 15.62 | 19    | 17.76 |
| LOC100506248 | 19.28 | 14.22 | 17.31 | 19.27 | 18.24 | 15.63 | 16.22 | 15.13 |
| CPE          | 16.18 | 14.87 | 16.03 | 17.69 | 15.49 | 15.63 | 17.31 | 16.33 |
| TM2D1        | 15.21 | 16.02 | 15.94 | 17.86 | 14.91 | 15.63 | 21.58 | 19.49 |
| SCOC         | 13.65 | 15.27 | 15.02 | 15.45 | 16.17 | 15.63 | 22.08 | 19.76 |
| RNF31        | 17.89 | 18.96 | 17.85 | 15.65 | 14.59 | 15.65 | 12.4  | 13.41 |
| TCEAL3       | 17.54 | 15.8  | 16.85 | 16.37 | 15.57 | 15.65 | 14.66 | 17.46 |
| KCNJ2        | 8.22  | 7.26  | 9.61  | 10.83 | 18.28 | 15.65 | 22.88 | 20.41 |
| LSM1         | 16.25 | 14.16 | 17.62 | 17.86 | 16.15 | 15.66 | 17.89 | 18.98 |
| TTC17        | 15.17 | 14.02 | 15.61 | 16    | 16.96 | 15.66 | 21.01 | 19.23 |
| GATSL3       | 15.96 | 18.11 | 16.07 | 15.93 | 14.36 | 15.67 | 13.42 | 14.9  |
| MADD         | 16.57 | 17.29 | 15.91 | 15.73 | 15.32 | 15.67 | 15.28 | 15.51 |
| SORDL        | 15.19 | 15.73 | 15.38 | 15.66 | 16.27 | 15.67 | 16.67 | 15.64 |
| RBM18        | 14.83 | 13.84 | 15.86 | 18.21 | 18.26 | 15.67 | 23.2  | 21.2  |
| RRAGC        | 13.66 | 13.46 | 14.79 | 14.82 | 15.56 | 15.68 | 16.88 | 16.92 |
| CBX5         | 15.36 | 14.75 | 16.49 | 18.04 | 17.32 | 15.68 | 19.06 | 19.12 |
| PRKAR1B      | 13.83 | 14.32 | 13.79 | 12.89 | 15.55 | 15.69 | 11.19 | 12.16 |
| SULF2        | 11.76 | 12.4  | 12.27 | 11.83 | 17.16 | 15.69 | 16.37 | 17.27 |
| ARL17A       | 14.67 | 11.21 | 14.41 | 15.9  | 14.05 | 15.69 | 22.32 | 19.13 |
| NOA1         | 13.22 | 13.67 | 14.44 | 13.05 | 14.74 | 15.7  | 13.36 | 13.32 |
| SFXN3        | 16.7  | 16.84 | 16.13 | 17.04 | 15.77 | 15.7  | 16.06 | 16.11 |
| IRX3         | 15.52 | 16    | 13.29 | 13.87 | 13.6  | 15.72 | 10.59 | 13.28 |
| BRD3         | 16.95 | 17.01 | 16.89 | 17.4  | 15.19 | 15.72 | 14.14 | 14.8  |
| SH2B3        | 12.52 | 12.5  | 13.15 | 13.36 | 15.37 | 15.72 | 15.58 | 15.33 |
| NIP7         | 15.17 | 13.21 | 15.67 | 15.24 | 16.78 | 15.72 | 16.04 | 15.44 |
| ZNF692       | 10.56 | 10.29 | 10.95 | 12.3  | 15.12 | 15.72 | 17.06 | 15.8  |
| RPRD1B       | 14.29 | 15.1  | 15.83 | 15.81 | 16.48 | 15.72 | 15.99 | 16.3  |
| CCDC25       | 12.47 | 12.12 | 14.23 | 15.43 | 15.17 | 15.72 | 19.48 | 17.9  |
| GSTM4        | 17.93 | 17.28 | 14.84 | 15.61 | 16.03 | 15.73 | 16.09 | 15.93 |
| PPIL1        | 15.56 | 14.24 | 14.23 | 14.69 | 17.75 | 15.73 | 18.1  | 15.96 |
| MUM1         | 15.63 | 17.54 | 17.06 | 16.68 | 15.77 | 15.73 | 15.12 | 16.2  |
| DENND5A      | 16.99 | 17.08 | 17.78 | 17.2  | 17.83 | 15.73 | 17.28 | 16.42 |
| RFWD2        | 15.76 | 17.28 | 16.19 | 17.11 | 15.74 | 15.73 | 17.76 | 16.92 |
| BCS1L        | 15.51 | 15.64 | 15.45 | 13.37 | 14.2  | 15.74 | 12.96 | 13.97 |
| ANKRA2       | 14.15 | 12.03 | 13.88 | 15.34 | 14.83 | 15.74 | 19.94 | 18.43 |
| PRPF38A      | 16.67 | 14.65 | 17.23 | 18.09 | 15.58 | 15.75 | 20.04 | 17.57 |
| RNF139       | 14.84 | 15.26 | 15.78 | 15.69 | 16.96 | 15.75 | 19.33 | 18.01 |
| VPS9D1       | 13.72 | 14.54 | 14.77 | 13.82 | 16.09 | 15.76 | 13.58 | 14.58 |
| KCNAB2       | 12.77 | 14.67 | 13.83 | 13.06 | 15.22 | 15.78 | 12.53 | 13.19 |
| PAFAH1B1     | 14.31 | 13.49 | 15.34 | 16.54 | 16.04 | 15.78 | 20.97 | 17.48 |

|              |       |       |       |       |       |       |       |       |
|--------------|-------|-------|-------|-------|-------|-------|-------|-------|
| TCERG1       | 14.1  | 13.68 | 15.02 | 17.05 | 16.03 | 15.78 | 23.28 | 21.9  |
| MFSD5        | 17.84 | 15.62 | 16.45 | 16.61 | 16.61 | 15.79 | 14.73 | 14.47 |
| TMX1         | 15.11 | 14.75 | 16.04 | 17.79 | 16.89 | 15.79 | 24.5  | 20.14 |
| ZRANB2       | 15.31 | 14.39 | 16.61 | 19.25 | 16.25 | 15.8  | 26.51 | 21.81 |
| CARS2        | 13.94 | 13.84 | 13.55 | 14.93 | 15.79 | 15.81 | 14.04 | 15.11 |
| ZNF706       | 15.84 | 14.22 | 14.24 | 15.2  | 16.41 | 15.82 | 16.67 | 16.46 |
| IGF1R        | 16.72 | 16.6  | 16.05 | 18.14 | 14.88 | 15.83 | 16.49 | 17.13 |
| DDX50        | 13.65 | 12.25 | 14.16 | 15.46 | 15.27 | 15.83 | 19.69 | 18.16 |
| MEST         | 25.02 | 23.05 | 25.58 | 25.84 | 15.75 | 15.84 | 18.06 | 17.45 |
| MRPL44       | 13.36 | 12.91 | 13.34 | 14.64 | 14.17 | 15.85 | 16.6  | 16.11 |
| MEF2D        | 17.39 | 17.23 | 16.55 | 16.83 | 15.65 | 15.86 | 14    | 15.21 |
| SMC1A        | 15.85 | 14.85 | 16.65 | 16.57 | 16.36 | 15.86 | 17.39 | 16.56 |
| SGF29        | 18.16 | 20.46 | 15.43 | 16.9  | 16.84 | 15.88 | 12.89 | 14.52 |
| KIAA0430     | 15.34 | 14.93 | 16.26 | 16.51 | 15.75 | 15.88 | 19.79 | 17.57 |
| FAH          | 16.15 | 16.98 | 16.39 | 14.08 | 16.52 | 15.89 | 13.78 | 14.02 |
| GNL1         | 15.61 | 16.52 | 16.44 | 15.22 | 15.6  | 15.89 | 14.31 | 14.19 |
| CTDSP1       | 16.94 | 16.02 | 17.01 | 16.32 | 15.84 | 15.89 | 17.98 | 16    |
| LPXN         | 14.76 | 15.92 | 15.97 | 15.13 | 16.8  | 15.89 | 18.25 | 16.93 |
| NUP43        | 14.34 | 14.24 | 14.48 | 15.61 | 15.63 | 15.89 | 20.6  | 17.22 |
| COPS8        | 14.83 | 14.18 | 15.6  | 16.98 | 17.42 | 15.89 | 19.98 | 18.36 |
| PLEKHA1      | 14.64 | 14.69 | 16.99 | 20.55 | 16.94 | 15.89 | 25.73 | 23.64 |
| AP1G1        | 15.47 | 14.49 | 16.27 | 17.94 | 16.76 | 15.9  | 20.7  | 18.96 |
| LSM14A       | 14.55 | 13.15 | 16.21 | 18.41 | 16.09 | 15.91 | 21.28 | 19.73 |
| ZNF146       | 14.21 | 13.66 | 15.62 | 17.46 | 15.06 | 15.91 | 25.43 | 22.07 |
| TAP2         | 16.26 | 16.45 | 16.35 | 16.49 | 15.95 | 15.92 | 13.76 | 13.91 |
| NKD2         | 17.56 | 18.4  | 17.88 | 16.79 | 16.05 | 15.92 | 14.45 | 15.82 |
| GRAMD4       | 15.14 | 14.99 | 15.53 | 14.4  | 16.03 | 15.93 | 14.62 | 15.06 |
| ASAP2        | 14.2  | 13.04 | 16.33 | 17.86 | 15.33 | 15.93 | 20.52 | 18.74 |
| MFSD12       | 14.46 | 14.86 | 14.07 | 14.7  | 13.83 | 15.94 | 12.38 | 12.05 |
| AXL          | 22.69 | 23.63 | 22.66 | 21.23 | 15.64 | 15.94 | 15.24 | 15.89 |
| PDPR         | 14.56 | 15.31 | 15.57 | 15.22 | 15.26 | 15.94 | 17.03 | 16.82 |
| DCBLD1       | 13.62 | 14.81 | 15.36 | 14.71 | 16.01 | 15.95 | 17.51 | 16    |
| TLK2         | 15.66 | 14.71 | 17.46 | 18.59 | 16.26 | 15.95 | 19.15 | 18.42 |
| MAPK11       | 13.7  | 13.79 | 11.6  | 12.72 | 15.93 | 15.96 | 14.37 | 15.03 |
| CCDC90B      | 14.15 | 13.39 | 13.99 | 14.73 | 15.16 | 15.96 | 20.91 | 17.21 |
| EIF3J        | 14.7  | 13.89 | 17.31 | 18.54 | 16.07 | 15.97 | 21.02 | 18.73 |
| GOLGA8B      | 10.82 | 9.89  | 13    | 15.29 | 14.22 | 15.97 | 29.66 | 24.35 |
| ZNF496       | 21.55 | 20.16 | 21.52 | 21.51 | 14.58 | 15.98 | 14.18 | 15.01 |
| C16orf62     | 15.2  | 16.06 | 15.44 | 15.31 | 16.26 | 15.98 | 16.03 | 16.52 |
| CTCF         | 17.63 | 17.92 | 19.29 | 18.54 | 16.54 | 15.98 | 17.18 | 17.21 |
| RHOBTB3      | 14.56 | 12.88 | 16.27 | 18.31 | 16.48 | 15.98 | 23.08 | 19.88 |
| UBAP2        | 14.12 | 13.81 | 14.71 | 14.89 | 15.92 | 15.99 | 15.83 | 16.33 |
| FAM122B      | 14.23 | 13.31 | 16.08 | 16.48 | 17.18 | 15.99 | 22.72 | 20.36 |
| PSMD5        | 15.24 | 15.11 | 15.97 | 15.79 | 17.02 | 16    | 19.66 | 16.78 |
| VPS4B        | 13.69 | 12.39 | 17.11 | 18.34 | 16.69 | 16    | 23.91 | 21.76 |
| AFF4         | 14.48 | 12.63 | 17.33 | 20.5  | 16.84 | 16    | 24.89 | 22.22 |
| GSTT2B       | 15.83 | 16.64 | 17.01 | 16.06 | 17.93 | 16.01 | 13.42 | 14.24 |
| RWDD1        | 15.07 | 14.84 | 15.83 | 15.54 | 17.33 | 16.01 | 18.94 | 18.52 |
| DLG1         | 11.84 | 10.46 | 15.16 | 15.75 | 18.05 | 16.01 | 25.92 | 21.45 |
| KIF5B        | 13.35 | 12.44 | 15.71 | 19.16 | 16.02 | 16.01 | 27.93 | 24.07 |
| NCOA5        | 17.32 | 17.09 | 17.39 | 17.02 | 16.34 | 16.02 | 16.11 | 16.59 |
| FYN          | 18.88 | 16.7  | 19.55 | 19.76 | 16.54 | 16.02 | 17.44 | 16.61 |
| UTP14A       | 14.43 | 16    | 16.47 | 15.12 | 17.62 | 16.02 | 17.58 | 17.98 |
| LOC107984841 | 13.02 | 10.77 | 15.03 | 18.17 | 14.47 | 16.02 | 22.54 | 19.22 |
| CEP57        | 14.6  | 14.06 | 16.45 | 17.4  | 16.72 | 16.03 | 24.75 | 21.46 |
| VARA2        | 14.62 | 15.2  | 14.51 | 13.84 | 14.78 | 16.04 | 13.92 | 12.99 |
| DGCR8        | 17.14 | 17.76 | 17.68 | 17.9  | 16.15 | 16.04 | 16.42 | 16.01 |
| MICU1        | 14.76 | 15.18 | 15.78 | 15.68 | 17.22 | 16.04 | 15.83 | 16.47 |
| HDAC11       | 13.88 | 15.86 | 13.95 | 13.72 | 15.89 | 16.05 | 11.99 | 14.47 |
| TMEM2        | 17.18 | 16.86 | 18.95 | 20.9  | 16.56 | 16.05 | 20.26 | 18.38 |
| ATP2B4       | 15.57 | 16.21 | 16.67 | 17.94 | 15.41 | 16.06 | 19.02 | 18.94 |
| B3GNT9       | 16.69 | 17.35 | 15.53 | 14.45 | 15.44 | 16.07 | 13.04 | 14.87 |
| FOXO1        | 16.11 | 15.01 | 17.11 | 16.86 | 15.18 | 16.07 | 16.55 | 16.07 |
| LETM1        | 14.65 | 14.43 | 13.73 | 13.26 | 15.88 | 16.08 | 13.95 | 15.4  |
| CDC48        | 13.05 | 14.01 | 12.2  | 11.44 | 16.69 | 16.08 | 16.08 | 16.03 |
| MFSD1        | 14.02 | 13.32 | 15    | 14.54 | 17.37 | 16.08 | 20.11 | 18.18 |
| BTBD10       | 15.04 | 13.52 | 16.55 | 16.27 | 17.14 | 16.08 | 21.85 | 19.05 |
| IPO4         | 15.32 | 15.07 | 13.89 | 14.08 | 14.56 | 16.09 | 12.91 | 12.44 |
| PIGV         | 14.49 | 15.12 | 14.94 | 14.66 | 16.68 | 16.09 | 14.94 | 15.15 |
| TMEM104      | 14.9  | 15.74 | 14.7  | 14.32 | 15.07 | 16.1  | 13.65 | 16.53 |
| RALGAPB      | 13.92 | 12.99 | 14.91 | 16.04 | 16.43 | 16.1  | 21.09 | 18.58 |
| SAT2         | 15.39 | 16.41 | 15.47 | 15.36 | 18.84 | 16.1  | 15.63 | 19.55 |
| AGPAT5       | 12.92 | 11.83 | 14.56 | 14.75 | 17.35 | 16.1  | 23.47 | 19.81 |
| FBXL15       | 16.44 | 15.29 | 13.67 | 12.62 | 15.43 | 16.11 | 10.55 | 12.82 |
| ABCB6        | 15.51 | 15.7  | 15.49 | 14.82 | 15.31 | 16.12 | 14    | 14.19 |
| MTG1         | 16.24 | 16.44 | 16.17 | 16.61 | 18.17 | 16.12 | 15.2  | 15.51 |
| HEY1         | 16.97 | 17.34 | 16.61 | 17.56 | 14.76 | 16.12 | 15.35 | 16.51 |
| CA2          | 9.32  | 9.39  | 9.45  | 9.2   | 17.89 | 16.12 | 20.46 | 17.06 |
| DNAJB12      | 12.9  | 13.47 | 14.18 | 13.44 | 15.9  | 16.13 | 14.68 | 14.63 |
| FN3K         | 19.89 | 20.6  | 18.64 | 17.64 | 16.64 | 16.14 | 12.6  | 14.08 |
| TMX3         | 12.68 | 13.06 | 14.81 | 18.16 | 16.38 | 16.14 | 29.87 | 25.65 |
| MRPL50       | 16.12 | 16.66 | 17.09 | 19.16 | 17.76 | 16.15 | 23.26 | 20.39 |
| MOB2         | 14.62 | 14.07 | 14.14 | 13.69 | 16.07 | 16.17 | 13.2  | 13.62 |
| WNK2         | 18.63 | 18.92 | 17.44 | 17.1  | 14.6  | 16.17 | 12.4  | 14.22 |
| METTL2A      | 14.66 | 14.62 | 15.33 | 15.09 | 16.21 | 16.17 | 16.52 | 16.48 |
| WDFY1        | 12.83 | 12.86 | 15.18 | 16.28 | 15.77 | 16.17 | 21.23 | 20.79 |
| REXO1        | 15.1  | 15.19 | 14.93 | 14.22 | 15.79 | 16.18 | 12.48 | 13.13 |
| FOXK1        | 16.22 | 15.91 | 15    | 15.16 | 16.66 | 16.18 | 13.95 | 16.25 |



|              |       |       |       |       |       |       |       |       |
|--------------|-------|-------|-------|-------|-------|-------|-------|-------|
| UNC119B      | 15.6  | 15.01 | 15.5  | 15.95 | 17.87 | 16.18 | 16.55 | 16.76 |
| TSPYL1       | 15.31 | 15.2  | 15.2  | 15.28 | 15.71 | 16.19 | 15.79 | 16.01 |
| GMIP         | 14.11 | 15.14 | 14.3  | 14.33 | 14.21 | 16.2  | 14.47 | 14.61 |
| KLHDC4       | 14.15 | 15.04 | 12.78 | 13.51 | 14.74 | 16.2  | 14.62 | 14.77 |
| LRSAM1       | 16.2  | 16.11 | 15.19 | 14.83 | 15.29 | 16.2  | 13.11 | 15.43 |
| RHNO1        | 14.39 | 14.43 | 14.98 | 14.49 | 16.4  | 16.2  | 17.75 | 15.78 |
| SEC22C       | 15.21 | 13.15 | 14.64 | 15.77 | 15.78 | 16.2  | 16.68 | 16.77 |
| UIMC1        | 13.3  | 14.96 | 17.09 | 16.32 | 16    | 16.2  | 19.35 | 16.77 |
| HARS2        | 15.75 | 15.04 | 16.35 | 17.02 | 17.24 | 16.2  | 17.6  | 17.24 |
| NR1D1        | 12    | 14.96 | 12.05 | 13.07 | 14.59 | 16.21 | 12.3  | 14.5  |
| PUS1         | 14.95 | 12.77 | 12.95 | 13.13 | 15.74 | 16.22 | 15.46 | 14.46 |
| LRCH4        | 16.37 | 16.27 | 14.75 | 14.72 | 15.19 | 16.23 | 13.22 | 14.42 |
| DUSP3        | 15.97 | 16.5  | 16.28 | 15.98 | 16.77 | 16.23 | 16.97 | 16.11 |
| TEX2         | 13.83 | 14.91 | 15.23 | 15.69 | 16.23 | 16.23 | 17.72 | 17.24 |
| DNAJC2       | 15.66 | 14.8  | 17.25 | 17.54 | 18.42 | 16.23 | 26.24 | 22.89 |
| CAND1        | 15.9  | 13.35 | 16.82 | 19.63 | 16.8  | 16.24 | 23.83 | 21.86 |
| TM2D3        | 13.98 | 13.79 | 14.52 | 17.31 | 16.22 | 16.26 | 16.56 | 18.75 |
| UBXN4        | 16.34 | 14.83 | 18.53 | 22.76 | 18.4  | 16.26 | 29.79 | 24.19 |
| JADE2        | 20    | 19.39 | 19.19 | 18.67 | 16.51 | 16.27 | 14.33 | 15.19 |
| GRIPAP1      | 16.93 | 17.32 | 16.85 | 16.66 | 18.14 | 16.27 | 17.84 | 17.17 |
| MRPL35       | 18.25 | 16.31 | 17.72 | 15.97 | 22.66 | 16.28 | 22.95 | 17.14 |
| SERF1B       | 13.18 | 12.65 | 13.33 | 15.26 | 18.81 | 16.28 | 19.92 | 18.43 |
| ZFP91        | 15.6  | 14.62 | 16.58 | 16.77 | 17.77 | 16.29 | 21.3  | 18.94 |
| PLK3         | 12.73 | 12.9  | 12.02 | 12.78 | 15.2  | 16.3  | 14.16 | 13.76 |
| RPH3AL       | 15.15 | 17.69 | 16.17 | 15.3  | 15.26 | 16.3  | 11.98 | 15    |
| GNG10        | 16.32 | 18.26 | 16.81 | 20.58 | 19.77 | 16.3  | 28.05 | 23.41 |
| FAM229B      | 18    | 16.24 | 15.23 | 15.45 | 14.21 | 16.31 | 14.49 | 14.86 |
| TRAK1        | 15.48 | 15.28 | 16.05 | 17.29 | 17.1  | 16.31 | 17.6  | 17.59 |
| MTFR1        | 13.36 | 13.02 | 15.51 | 16.2  | 17.04 | 16.31 | 19.42 | 18.08 |
| DCTN6        | 13.36 | 13.07 | 12.98 | 16.2  | 15.31 | 16.33 | 20.35 | 17.81 |
| EMC9         | 15.33 | 13.61 | 15.25 | 14.34 | 13.68 | 16.34 | 12.34 | 13.05 |
| MTIF2        | 13.87 | 13.99 | 14.97 | 17.41 | 17.94 | 16.34 | 25.21 | 22.1  |
| DNAJC30      | 16.63 | 16.21 | 14.52 | 14.58 | 15.28 | 16.35 | 11.9  | 12.67 |
| COX20        | 16.55 | 14.08 | 15.56 | 17.26 | 16.51 | 16.35 | 20.31 | 18.02 |
| TFAM         | 14.3  | 14.83 | 16.09 | 17.02 | 17.16 | 16.35 | 21.24 | 19.61 |
| ACSF2        | 19.1  | 20.36 | 17.06 | 18.45 | 16.82 | 16.36 | 14.83 | 17.79 |
| ARL8B        | 14.2  | 14.07 | 16.29 | 17.25 | 17.89 | 16.36 | 23.06 | 20.43 |
| GRSF1        | 14.99 | 14.97 | 15.07 | 15.39 | 16.96 | 16.37 | 20.79 | 18.8  |
| TMEM209      | 15.25 | 14.7  | 16.89 | 20.65 | 16.95 | 16.37 | 24.28 | 19.65 |
| CDK12        | 16.31 | 14.68 | 16.59 | 17.25 | 16.95 | 16.39 | 19.49 | 18.14 |
| D2HGDH       | 13.57 | 12.29 | 13.09 | 13.63 | 14.57 | 16.4  | 15.86 | 15.49 |
| BBS2         | 14.85 | 14.79 | 14.67 | 15.45 | 16.29 | 16.4  | 18.53 | 18.43 |
| LOC100289279 | 19.06 | 18.12 | 18.75 | 19.45 | 14.28 | 16.41 | 14.69 | 14.65 |
| KCMF1        | 15.94 | 16.43 | 15.74 | 17.48 | 16.81 | 16.41 | 16.69 | 15.32 |
| SLC25A38     | 15.16 | 14.91 | 15.56 | 14.48 | 16.42 | 16.42 | 15.13 | 16.47 |
| KAT7         | 16.44 | 17.35 | 16.67 | 16.23 | 17.53 | 16.43 | 16.97 | 16.65 |
| POLR1C       | 16.21 | 14.96 | 15.81 | 16.42 | 16.85 | 16.43 | 17.11 | 17.27 |
| CHMP1B       | 15.44 | 13.41 | 15.58 | 16.34 | 16.88 | 16.43 | 17.89 | 17.4  |
| AHSA2        | 11.45 | 10.99 | 13.28 | 17.88 | 15.11 | 16.43 | 29.04 | 24.53 |
| CCDC57       | 14.62 | 14.66 | 14.73 | 15.15 | 15.71 | 16.44 | 15.41 | 15.27 |
| TVP23B       | 14.5  | 15.05 | 15.29 | 16.21 | 17.99 | 16.44 | 24.31 | 21.06 |
| PQLC2        | 15.58 | 14.72 | 14.21 | 14.59 | 15.67 | 16.45 | 14.02 | 14.98 |
| TIAL1        | 13.95 | 14.37 | 14.98 | 14.77 | 15.84 | 16.45 | 20.53 | 18.74 |
| TMEM198      | 17.22 | 15.63 | 14.52 | 13.7  | 15.24 | 16.46 | 11.4  | 13.29 |
| SURF6        | 15.2  | 15.05 | 15.72 | 16.12 | 16.83 | 16.46 | 15.28 | 16.36 |
| EFNA1        | 23.7  | 23.91 | 24.31 | 20.03 | 18.76 | 16.46 | 16.99 | 17.24 |
| WRB          | 13.76 | 12.81 | 14.02 | 17.15 | 15.74 | 16.47 | 18.74 | 17.89 |
| SLC2A6       | 12.92 | 14.65 | 11.89 | 11.6  | 13.8  | 16.48 | 12.21 | 13.85 |
| WARS         | 19.6  | 18.65 | 18.54 | 17.02 | 15.16 | 16.48 | 15.73 | 14.15 |
| PPP2R5A      | 15.31 | 15.09 | 17.67 | 18.89 | 16.04 | 16.48 | 19.24 | 17.89 |
| COL5A2       | 16.63 | 16.01 | 17.2  | 18.57 | 16.85 | 16.48 | 18.54 | 19.13 |
| IL13RA1      | 15.93 | 15.32 | 16.58 | 17.03 | 17.66 | 16.48 | 21.15 | 19.96 |
| IPO9         | 16.17 | 15.71 | 17.01 | 17.16 | 16.87 | 16.49 | 19.01 | 17.59 |
| KREMEN1      | 17.37 | 17.47 | 17.56 | 17.62 | 15.74 | 16.5  | 14.53 | 16.17 |
| TBC1D2       | 14.49 | 14.83 | 15.16 | 13.68 | 16.83 | 16.51 | 14.12 | 14.2  |
| SLC41A1      | 15.08 | 16.75 | 15.88 | 15.53 | 17    | 16.51 | 16.88 | 18.21 |
| METRNL       | 15.77 | 15.43 | 14.77 | 14.18 | 13.76 | 16.52 | 12.27 | 12.03 |
| SPPL3        | 17.33 | 18.08 | 16.52 | 16.85 | 17.86 | 16.52 | 16.54 | 17.04 |
| SP100        | 23.33 | 22.15 | 25.59 | 28.52 | 19.73 | 16.52 | 25.49 | 20.63 |
| DUSP9        | 34.19 | 32.6  | 30.71 | 26.03 | 16.12 | 16.53 | 11.54 | 14.39 |
| FBRSL1       | 15.42 | 14.81 | 14.35 | 14.51 | 14.46 | 16.53 | 12.27 | 14.41 |
| TES          | 20.09 | 17.89 | 20.65 | 20.84 | 17.78 | 16.53 | 21.97 | 21.27 |
| FAM53C       | 15.76 | 16.17 | 16.47 | 15.4  | 17.14 | 16.54 | 14.94 | 16.08 |
| RAB14        | 15.43 | 14.66 | 17.01 | 17.25 | 17.22 | 16.54 | 20.04 | 18.24 |
| LRRC75B      | 17.92 | 17.95 | 19.14 | 16.27 | 14.73 | 16.55 | 14.97 | 14.88 |
| PPP6R3       | 15.85 | 14.11 | 17.65 | 20.16 | 18.69 | 16.55 | 26.81 | 23.39 |
| PWP1         | 15.76 | 15.15 | 17.23 | 17.09 | 17.67 | 16.56 | 20.42 | 19.07 |
| PTPN11       | 13.07 | 12.02 | 16.04 | 18.01 | 17.58 | 16.56 | 24.92 | 21.66 |
| DNLZ         | 18.22 | 16    | 12.41 | 15.24 | 15.65 | 16.57 | 10.84 | 12.96 |
| CPOX         | 15.44 | 13.29 | 14.99 | 15.29 | 15.22 | 16.57 | 17.15 | 16.36 |
| PWWP2B       | 15.95 | 16.71 | 14.75 | 13.7  | 15.06 | 16.58 | 10.75 | 12.64 |
| MAP3K14      | 17.55 | 16.98 | 17.68 | 16.4  | 17.16 | 16.58 | 14.54 | 14.95 |
| ALDH1A3      | 13.94 | 13.36 | 14.18 | 15.86 | 17.35 | 16.58 | 18.73 | 16.83 |
| RPRD2        | 17.7  | 18.14 | 17.82 | 18.27 | 17.58 | 16.58 | 19.04 | 19.52 |
| UBQLN2       | 19.01 | 17.29 | 17.53 | 18.99 | 17.78 | 16.59 | 18.73 | 19.13 |
| IER3IP1      | 17.29 | 17.47 | 17.05 | 20    | 17.36 | 16.59 | 23.06 | 20.59 |
| INCENP       | 15.62 | 13.71 | 15.09 | 14.57 | 16.91 | 16.6  | 14.1  | 15.15 |
| LAT          | 19.03 | 18.33 | 17.84 | 17.91 | 17.94 | 16.6  | 14.19 | 16.4  |

|           |       |       |       |       |       |       |       |       |
|-----------|-------|-------|-------|-------|-------|-------|-------|-------|
| LEPROT    | 14.69 | 14.73 | 16.71 | 17.69 | 17.05 | 16.6  | 20.31 | 20.19 |
| SART3     | 17.7  | 16.97 | 17.29 | 17.24 | 17.39 | 16.61 | 16.98 | 17.09 |
| UBP1      | 14.56 | 14.61 | 15.04 | 15.87 | 16.53 | 16.62 | 19.52 | 18.52 |
| GGNBP2    | 17.51 | 15.73 | 18.24 | 20.25 | 19.11 | 16.62 | 23.59 | 21.7  |
| NUDT5     | 15.58 | 15.35 | 17.22 | 16.17 | 17.4  | 16.63 | 20.31 | 18.75 |
| FHOD1     | 15.48 | 15.73 | 15.09 | 13.43 | 16.73 | 16.64 | 14.07 | 14.71 |
| COMMD1    | 16.14 | 17.39 | 17.76 | 16.71 | 17.28 | 16.64 | 17.37 | 16.16 |
| NFKBIL1   | 16.46 | 16    | 13.38 | 14.88 | 16.97 | 16.65 | 12.23 | 13.54 |
| AP5S1     | 14.35 | 14.39 | 14.05 | 13.02 | 15.89 | 16.65 | 13.87 | 15.36 |
| TMEM131   | 15.71 | 14.03 | 16.63 | 19.42 | 17    | 16.65 | 21.25 | 19.72 |
| CMC1      | 18.48 | 14.26 | 16.2  | 16.19 | 15.35 | 16.67 | 17.13 | 16.51 |
| ZCCHC3    | 16.96 | 17.3  | 17.51 | 17.5  | 16.76 | 16.69 | 14.66 | 14.85 |
| EIF2S1    | 14.33 | 14.4  | 15.51 | 16.4  | 18.23 | 16.69 | 22.24 | 19.47 |
| LOC613037 | 14.89 | 14    | 16.85 | 20.96 | 16.33 | 16.69 | 26.38 | 21.32 |
| PNO1      | 16.09 | 14.08 | 16.62 | 15.89 | 19.15 | 16.7  | 20.03 | 19.15 |
| TRAPPC2L  | 16.03 | 14.63 | 14.89 | 13.32 | 16.53 | 16.71 | 13.57 | 14.9  |
| AP4M1     | 16.77 | 16.88 | 16.27 | 14.97 | 15.25 | 16.72 | 13.64 | 15.98 |
| PAAF1     | 16.15 | 15.79 | 16.83 | 16.26 | 18.29 | 16.72 | 15.56 | 17.11 |
| ADM       | 20.48 | 16.06 | 19.37 | 17.51 | 19.54 | 16.73 | 19.25 | 15.04 |
| GINS2     | 19.06 | 19.09 | 18.51 | 17.08 | 18.64 | 16.73 | 16.26 | 15.08 |
| LRP8      | 12.28 | 12.81 | 13.26 | 14.19 | 16.82 | 16.73 | 17.19 | 18.02 |
| KLHL12    | 15.62 | 15.56 | 15.67 | 16.69 | 18.35 | 16.73 | 20.27 | 18.22 |
| DRAM2     | 17.28 | 18.1  | 19.89 | 18.98 | 19.43 | 16.73 | 22.6  | 20.89 |
| PSMD12    | 13.77 | 14.09 | 16.46 | 16.68 | 17.68 | 16.75 | 22    | 20.12 |
| CDC73     | 16.25 | 16.02 | 17.46 | 19.81 | 16.72 | 16.75 | 22.17 | 20.84 |
| CEPT1     | 15.55 | 15.65 | 16.46 | 17.81 | 18.08 | 16.75 | 23.94 | 21    |
| CERS6     | 14.82 | 13.3  | 16.88 | 20.27 | 17.21 | 16.75 | 23.93 | 21.62 |
| LYNX1     | 15.24 | 17.23 | 15.27 | 15.05 | 15.87 | 16.76 | 12.79 | 14.13 |
| ZNF746    | 15.26 | 15.41 | 14.82 | 15.02 | 15.73 | 16.76 | 12.52 | 14.36 |
| FCF1      | 13.93 | 13.52 | 15.39 | 16.64 | 16.73 | 16.76 | 20.48 | 18.91 |
| NUP50     | 15.07 | 14.17 | 16.25 | 19.03 | 17.09 | 16.76 | 24.23 | 19.76 |
| KIFC3     | 14.49 | 14.96 | 14.57 | 14.67 | 16.21 | 16.77 | 12.53 | 14.13 |
| CHD1L     | 15.29 | 16.15 | 16.33 | 16.37 | 15.91 | 16.77 | 18.49 | 17.49 |
| SGSM3     | 17.01 | 17.78 | 16.13 | 16.17 | 15.62 | 16.78 | 15.01 | 14.91 |
| HAUS1     | 13.14 | 15.54 | 16.67 | 14.86 | 16.37 | 16.8  | 21.5  | 16.14 |
| SRPK2     | 14.45 | 13.55 | 16.04 | 17.53 | 16.56 | 16.8  | 21.15 | 20.49 |
| ORC4      | 14.34 | 13.38 | 15.97 | 21.03 | 14.7  | 16.8  | 33.5  | 26.28 |
| DCTN5     | 16.71 | 16.4  | 16.78 | 17.59 | 17.75 | 16.81 | 20.52 | 19.54 |
| RNF123    | 15.73 | 15.36 | 14.95 | 13.92 | 16.41 | 16.82 | 14.37 | 15.34 |
| CPT2      | 15.29 | 17.25 | 15.74 | 16.63 | 18.14 | 16.82 | 15.91 | 16.27 |
| WDR55     | 16.13 | 17.59 | 16.34 | 16.38 | 17.76 | 16.82 | 16.91 | 16.29 |
| FCHSD1    | 16.97 | 17.98 | 16.73 | 17.76 | 16.99 | 16.82 | 16.08 | 17.11 |
| RECQL5    | 15.98 | 16.4  | 15.69 | 15.34 | 17.33 | 16.83 | 14.31 | 15.34 |
| EIF4G3    | 16.02 | 14.66 | 18.22 | 20.45 | 19.38 | 16.83 | 25.84 | 23.37 |
| ZC3H3     | 17.73 | 18.31 | 16    | 15.68 | 15.77 | 16.84 | 14.24 | 15.01 |
| CDS2      | 15.98 | 16.48 | 15.93 | 16.63 | 16.99 | 16.84 | 16.81 | 16.32 |
| DNAJC21   | 14.15 | 13.64 | 16    | 19    | 16.78 | 16.85 | 23.31 | 21.93 |
| TIMM21    | 15.72 | 15.23 | 16.79 | 18.37 | 19.97 | 16.85 | 27.56 | 22.7  |
| CNOT9     | 17.3  | 17.29 | 18.34 | 18.37 | 17.98 | 16.86 | 19.85 | 18.06 |
| SPIRE2    | 14.66 | 13.25 | 13.41 | 12.64 | 14.35 | 16.87 | 12.28 | 12.96 |
| SKIV2L2   | 14.23 | 13.54 | 16.35 | 18.45 | 16.91 | 16.87 | 25.41 | 22.23 |
| CCDC6     | 13.08 | 13.09 | 14.08 | 15.6  | 16.8  | 16.88 | 20.84 | 18.51 |
| FBXO9     | 14.33 | 13.33 | 15.22 | 15.21 | 17.86 | 16.88 | 21.83 | 20.69 |
| NPIPB3    | 14.5  | 13.69 | 13.58 | 14.11 | 16.89 | 16.89 | 17.63 | 19.79 |
| RELL2     | 11.53 | 12.9  | 11.92 | 11.01 | 15.8  | 16.9  | 14.31 | 15.34 |
| ELP3      | 16.81 | 16.09 | 16.52 | 15.55 | 17.43 | 16.9  | 16.37 | 16.72 |
| ANKZF1    | 19.29 | 17.4  | 16.51 | 17.94 | 15.73 | 16.91 | 16.54 | 16.46 |
| USP48     | 13.68 | 12.05 | 15.16 | 16.33 | 17.35 | 16.91 | 23.84 | 20.21 |
| EARS2     | 14.38 | 13.98 | 14.09 | 13.74 | 15.98 | 16.92 | 15.16 | 15.65 |
| MRPS10    | 14.56 | 13.22 | 14.75 | 16.59 | 16.54 | 16.92 | 19.87 | 17.56 |
| BIN3      | 17.02 | 17.64 | 17.81 | 17.09 | 16.03 | 16.93 | 15.32 | 17.81 |
| INTS5     | 16.12 | 17    | 16.41 | 13.47 | 15.35 | 16.94 | 12.99 | 14.74 |
| CSTF2     | 15.58 | 16.7  | 17.17 | 15.8  | 17.62 | 16.94 | 17.39 | 16.89 |
| DCPS      | 19.75 | 19.87 | 19.21 | 16.18 | 17.32 | 16.94 | 15.22 | 17.27 |
| RFWD3     | 16.98 | 17.75 | 17.29 | 18.09 | 18.9  | 16.94 | 18.91 | 17.42 |
| H1FO      | 31.7  | 32.24 | 32.33 | 29.67 | 19.19 | 16.94 | 17.23 | 17.85 |
| ORC5      | 13.25 | 12.42 | 14.46 | 15.58 | 17.49 | 16.94 | 22.92 | 19.1  |
| OSBPL2    | 17.41 | 17.41 | 17.7  | 18.1  | 18.14 | 16.94 | 19.85 | 19.12 |
| BET1      | 13.32 | 15.28 | 16.8  | 16.8  | 17.27 | 16.94 | 23.16 | 20.5  |
| HGH1      | 14.96 | 13.94 | 13.6  | 12.58 | 14.56 | 16.95 | 10.81 | 12.89 |
| DLG5      | 18.54 | 19.35 | 19.43 | 19.39 | 16.5  | 16.95 | 16.2  | 17.02 |
| STAG2     | 15.72 | 15.34 | 17.93 | 18.88 | 16.28 | 16.95 | 25.75 | 23.89 |
| RBM15B    | 17.65 | 18.19 | 16.51 | 16.11 | 16.75 | 16.97 | 14.31 | 15.53 |
| UNG       | 17.98 | 17.66 | 18.38 | 17.07 | 17.96 | 16.97 | 17.17 | 16.34 |
| NCOA6     | 16.6  | 15.84 | 16.65 | 18.54 | 16.47 | 16.97 | 18.52 | 18.3  |
| BLOC1S2   | 15.06 | 17.3  | 17.17 | 17.7  | 20.2  | 16.97 | 26.66 | 21.14 |
| ZXDC      | 16.34 | 16.11 | 18.66 | 16.16 | 16.45 | 16.98 | 15.5  | 15.9  |
| KLC4      | 15.98 | 17.2  | 15.51 | 14.87 | 18.13 | 16.98 | 16.24 | 15.96 |
| MED27     | 16.65 | 18.74 | 19.08 | 15.72 | 18.87 | 16.98 | 17.13 | 17.41 |
| HMGB3     | 13.31 | 14.31 | 15.19 | 16.18 | 16.39 | 16.98 | 18.84 | 18.56 |
| PEX5      | 14.88 | 15.89 | 14.88 | 14.46 | 17.54 | 16.99 | 14.76 | 14.97 |
| CINP      | 15.98 | 15.32 | 15.92 | 15.07 | 17.81 | 16.99 | 16.07 | 15.33 |
| SEPHS1    | 14.7  | 13.87 | 15.74 | 14.67 | 18.1  | 17    | 17.99 | 17.1  |
| CEBPZ     | 15.18 | 14.75 | 16.52 | 18.31 | 17.94 | 17    | 27.46 | 23.46 |
| IFT43     | 18.76 | 17.52 | 17.08 | 17.54 | 15.49 | 17.02 | 16.45 | 17.13 |
| KPNA6     | 15.46 | 15.61 | 16.24 | 17.42 | 17.36 | 17.02 | 19.25 | 18.49 |
| SLC2A8    | 19.21 | 16.98 | 17.54 | 16.49 | 14.76 | 17.03 | 14.03 | 14.16 |
| KDM2A     | 17.37 | 18.33 | 17.36 | 17.9  | 16.21 | 17.03 | 16.51 | 16.1  |

|          |       |       |       |       |       |       |       |       |
|----------|-------|-------|-------|-------|-------|-------|-------|-------|
| UQCRB    | 14.11 | 16.11 | 15.15 | 16.54 | 17.42 | 17.03 | 20.32 | 18.98 |
| TP53I3   | 17.74 | 16.77 | 16.09 | 15.82 | 14.38 | 17.04 | 14.31 | 15.01 |
| UBA3     | 15.74 | 14.79 | 16.91 | 20.07 | 18.02 | 17.05 | 26.34 | 23.83 |
| CCDC58   | 18.19 | 18.78 | 19.27 | 21.94 | 18.97 | 17.06 | 22.24 | 20.02 |
| AMD1     | 13.96 | 14.88 | 14.02 | 16.9  | 17.46 | 17.07 | 22.88 | 19.46 |
| IFI27L1  | 19.5  | 20.86 | 20.98 | 17.76 | 17.24 | 17.09 | 15.03 | 17.69 |
| ENOPH1   | 13.92 | 13.64 | 15.33 | 14.81 | 17.48 | 17.09 | 19.67 | 18.06 |
| C2orf68  | 15.56 | 17.4  | 18.32 | 18.09 | 16.7  | 17.11 | 16.61 | 16.15 |
| MIA3     | 14.96 | 14.3  | 17.68 | 20.45 | 17.58 | 17.11 | 24.73 | 23.63 |
| WSB1     | 17.64 | 15.93 | 18.11 | 22.5  | 17.52 | 17.11 | 29.4  | 26.94 |
| PRKAR2A  | 17.21 | 15.32 | 16.83 | 15.65 | 16.27 | 17.12 | 14.97 | 15.37 |
| PLPP1    | 18.67 | 19.09 | 18.03 | 17.26 | 16.32 | 17.12 | 16.57 | 15.9  |
| MS4A4E   | 16.85 | 15.24 | 15.75 | 17.35 | 15.77 | 17.12 | 13.01 | 17.31 |
| UBE2V2   | 15.02 | 15.62 | 17.14 | 16.58 | 17.8  | 17.12 | 26.1  | 21.4  |
| MAP4K2   | 15.85 | 16.51 | 15.44 | 15.3  | 17.09 | 17.13 | 14.4  | 16.09 |
| PIP4K2C  | 15.61 | 16.1  | 16.15 | 14.22 | 19.46 | 17.13 | 15.75 | 17.21 |
| RRP7A    | 17.36 | 15.81 | 16.16 | 15.51 | 16.94 | 17.14 | 14.13 | 14.84 |
| MBD6     | 17.96 | 18.69 | 18.13 | 19.06 | 19.42 | 17.14 | 16.96 | 18    |
| COX11    | 15.39 | 14.39 | 16.85 | 17.69 | 17.84 | 17.15 | 19.94 | 17.94 |
| PCGF1    | 13.74 | 14.55 | 13.86 | 13.18 | 16.04 | 17.16 | 16.15 | 15.18 |
| PCYT1A   | 16.17 | 15.25 | 16.67 | 16.09 | 17.97 | 17.17 | 18.35 | 17.82 |
| BMS1     | 16.64 | 14.19 | 17.86 | 18.7  | 18.77 | 17.17 | 22.42 | 21.31 |
| ENAH     | 17.84 | 16.96 | 19    | 22.52 | 18.12 | 17.17 | 24.54 | 23.16 |
| TFE3     | 17.78 | 18.08 | 17.73 | 17.86 | 17.05 | 17.18 | 14.61 | 17.23 |
| H6PD     | 21.61 | 21.53 | 21.21 | 21.5  | 17.88 | 17.18 | 15.93 | 17.55 |
| TAF6L    | 14.57 | 15.21 | 14.46 | 13.6  | 15.02 | 17.19 | 11.88 | 13.59 |
| NUDT18   | 17.6  | 18.43 | 17.95 | 17.08 | 15.8  | 17.19 | 13.43 | 13.98 |
| MON1B    | 15.92 | 16.65 | 16.29 | 16.06 | 17.25 | 17.19 | 15.85 | 16.88 |
| STAT5B   | 17.99 | 18.13 | 17.97 | 17.41 | 18.11 | 17.19 | 17.31 | 17.84 |
| RPS27L   | 16.07 | 16.67 | 16.02 | 17.04 | 20.26 | 17.19 | 22.77 | 19.94 |
| MARK4    | 15.77 | 16.12 | 14.72 | 15.59 | 17.56 | 17.2  | 14.24 | 14.08 |
| SLC19A1  | 16.9  | 15.68 | 15.34 | 14.67 | 16.6  | 17.2  | 13.76 | 15.14 |
| HBEGF    | 13.36 | 14.43 | 13.77 | 14.68 | 18.46 | 17.2  | 17.37 | 18.17 |
| GNA11    | 19.38 | 19.6  | 18.27 | 17.92 | 16.42 | 17.21 | 13.19 | 14.71 |
| MRM2     | 16.45 | 17.67 | 16.32 | 15.58 | 18.15 | 17.21 | 18.85 | 17.24 |
| MAPK8IP1 | 14.8  | 15.73 | 14.6  | 13.69 | 15.4  | 17.22 | 12.88 | 14.81 |
| CTBP2    | 17.52 | 17.85 | 18.31 | 19.22 | 17.66 | 17.22 | 19.75 | 18.91 |
| AMDHD2   | 14.94 | 15.17 | 13.72 | 13.76 | 16.18 | 17.23 | 13.35 | 14.03 |
| CMSS1    | 16.27 | 15.92 | 15.09 | 16.06 | 17.95 | 17.24 | 19.39 | 19.12 |
| ZC3H14   | 18.13 | 14.21 | 18.2  | 19.26 | 18.44 | 17.24 | 23.68 | 20.92 |
| DGAT2    | 15.02 | 15.16 | 14.17 | 14.07 | 17.97 | 17.25 | 14.26 | 14.44 |
| FGFRL1   | 18.24 | 18.74 | 18.14 | 16.93 | 16.88 | 17.25 | 13    | 15.43 |
| PHF12    | 19.32 | 18.82 | 19.06 | 19.43 | 17.37 | 17.26 | 18.82 | 18.41 |
| ARHGAP29 | 14.56 | 13.95 | 17.85 | 20.57 | 18.24 | 17.26 | 30.71 | 24.92 |
| C3       | 18.62 | 18.32 | 17.43 | 16.76 | 17.55 | 17.27 | 15.76 | 15.65 |
| TMEM60   | 17.62 | 17.01 | 16.9  | 17.33 | 19.78 | 17.27 | 22.24 | 20.8  |
| IP6K1    | 17.22 | 18.07 | 17.84 | 16.68 | 17.11 | 17.28 | 15.09 | 16.2  |
| JAM3     | 19.07 | 18.22 | 18.64 | 20.37 | 18.92 | 17.28 | 19.56 | 18.17 |
| ALDH9A1  | 19.15 | 18.05 | 18.55 | 18.58 | 19.94 | 17.28 | 18.63 | 18.76 |
| TSPAN31  | 16.72 | 16.21 | 16.15 | 17.43 | 18.04 | 17.29 | 19.2  | 20.22 |
| MXI1     | 16.21 | 15.54 | 17.41 | 18.38 | 18.69 | 17.3  | 21.56 | 19.51 |
| LANCL1   | 15.63 | 13.81 | 16.56 | 18.89 | 17.76 | 17.31 | 24.85 | 22.44 |
| MKNK1    | 18.04 | 16.89 | 16.67 | 17.27 | 17.63 | 17.32 | 20.31 | 19.65 |
| MARK2    | 17.77 | 16.36 | 16.39 | 15.74 | 16.67 | 17.33 | 14.01 | 15.55 |
| CERS4    | 18.08 | 18.21 | 16.78 | 16    | 18.65 | 17.34 | 15.48 | 16.98 |
| HEATR1   | 16.07 | 14.7  | 17.1  | 17.72 | 18.8  | 17.34 | 22.99 | 20.27 |
| PI4K2A   | 17.03 | 17.59 | 15.89 | 16.22 | 17.29 | 17.35 | 16.24 | 16.78 |
| MCM5     | 22.71 | 20.74 | 19.8  | 19.35 | 17.89 | 17.36 | 13.42 | 13.52 |
| PUSL1    | 15.76 | 15.36 | 13.82 | 14.64 | 16.09 | 17.37 | 12.14 | 12.14 |
| ALKBH6   | 18.97 | 18.84 | 17.01 | 16.64 | 15.52 | 17.37 | 18.44 | 15.45 |
| RBP1     | 25.94 | 28.65 | 24.26 | 23.33 | 17.27 | 17.37 | 14.38 | 16.8  |
| OVCA2    | 13.06 | 15.61 | 14.53 | 14.53 | 15.82 | 17.38 | 11.46 | 12.85 |
| EIF2B3   | 16.7  | 17.93 | 16.96 | 16.87 | 18.15 | 17.39 | 18.29 | 17.85 |
| RBBP9    | 16.79 | 15.2  | 17.35 | 17.95 | 17.91 | 17.39 | 20.51 | 19.31 |
| C1RL     | 16.59 | 18.13 | 17.79 | 19.89 | 16.03 | 17.4  | 19.78 | 18.66 |
| HIBADH   | 14.64 | 14.49 | 15.83 | 17.49 | 17.79 | 17.4  | 21.47 | 19.18 |
| YIPF5    | 16.28 | 15.8  | 17.71 | 18.66 | 17.08 | 17.41 | 22.41 | 19.24 |
| MFAP1    | 18.9  | 20.23 | 21.84 | 21.78 | 17.91 | 17.41 | 20.22 | 20.3  |
| SLC35A2  | 17.39 | 18.57 | 17.64 | 17.81 | 17.48 | 17.42 | 15.8  | 17.97 |
| ELAVL1   | 17.97 | 18.22 | 17.55 | 16.39 | 16.06 | 17.43 | 15.23 | 15.31 |
| FANCI    | 15.22 | 13.66 | 15.98 | 16.65 | 18.29 | 17.43 | 22.46 | 18    |
| RALB     | 18.48 | 19.62 | 19.8  | 18.8  | 19.39 | 17.43 | 21.21 | 19.8  |
| TANGO2   | 14.86 | 16.15 | 14.49 | 15.35 | 15.65 | 17.44 | 15.26 | 15.64 |
| SPATS2   | 16.2  | 15.13 | 16.97 | 17.3  | 17.89 | 17.44 | 21.89 | 19.7  |
| IFI44    | 27.78 | 28.84 | 29.12 | 34.93 | 17.11 | 17.44 | 31.06 | 20.64 |
| WDR11    | 15.89 | 15.8  | 19.64 | 20.47 | 18.22 | 17.45 | 21.98 | 18.67 |
| USP21    | 16    | 17.42 | 16.4  | 16.91 | 16.25 | 17.46 | 15.85 | 15.89 |
| PMS2     | 16.34 | 15.51 | 15.21 | 16.12 | 17.93 | 17.46 | 18.75 | 17.7  |
| EXOSC7   | 15.38 | 16.67 | 17.45 | 18.69 | 19.01 | 17.46 | 18.05 | 18.83 |
| REEP5    | 16.85 | 15.58 | 18.11 | 18.96 | 17.56 | 17.46 | 25.37 | 21.77 |
| ZBED5    | 14.77 | 14.25 | 15.83 | 19.16 | 18.02 | 17.47 | 29.42 | 24.97 |
| DDX46    | 13.8  | 10.8  | 15.87 | 18.99 | 17.81 | 17.48 | 25.03 | 23.57 |
| ZMYM3    | 19.73 | 20.58 | 19.18 | 20.3  | 16.59 | 17.49 | 16.23 | 16.71 |
| XPO5     | 15.61 | 15.94 | 15.94 | 15.82 | 18.59 | 17.49 | 19.83 | 17.73 |
| GALT     | 16.06 | 16.14 | 16.26 | 14.88 | 17    | 17.5  | 15.85 | 17.14 |
| APOO     | 17.74 | 13.64 | 16.25 | 15.56 | 16.1  | 17.5  | 18.45 | 17.22 |
| ANO8     | 20.57 | 20.5  | 20.63 | 19.96 | 14.68 | 17.51 | 14.15 | 16.96 |
| ARIH2    | 16.54 | 16.74 | 16.85 | 16.78 | 18.95 | 17.51 | 19.66 | 19.1  |

|            |       |       |       |       |       |       |       |       |
|------------|-------|-------|-------|-------|-------|-------|-------|-------|
| RNF19B     | 16.38 | 17.53 | 18.23 | 17.04 | 17.72 | 17.52 | 15.03 | 14.6  |
| SLC44A1    | 17.08 | 16.17 | 20.4  | 21.48 | 16.6  | 17.52 | 23.43 | 19.75 |
| WWP2       | 18.26 | 17.59 | 17.03 | 16.71 | 17.41 | 17.54 | 15.63 | 15.3  |
| HMHA1      | 18.1  | 18.52 | 17.09 | 16.31 | 16.89 | 17.55 | 13.55 | 14.05 |
| PC         | 14.14 | 16.7  | 15.39 | 14.01 | 16.44 | 17.55 | 12.9  | 14.95 |
| PGS1       | 20.71 | 19.64 | 18.25 | 19.43 | 17.72 | 17.55 | 18.23 | 17.46 |
| ABLIM1     | 14.18 | 13.68 | 15.02 | 16.21 | 18.59 | 17.55 | 21.37 | 19.68 |
| SMC4       | 14.64 | 14.42 | 16.99 | 19.18 | 17.77 | 17.55 | 31.14 | 25.73 |
| NGDN       | 16.74 | 16.8  | 17.33 | 19.23 | 16.96 | 17.56 | 20.35 | 21.23 |
| KCTD2      | 19.04 | 18.24 | 17.31 | 17.52 | 18.26 | 17.58 | 15.62 | 17.76 |
| POLB       | 18.9  | 16.15 | 16.71 | 16.62 | 16.88 | 17.58 | 20.09 | 18.12 |
| NAMPT      | 15.74 | 15.49 | 17.52 | 20.3  | 18.82 | 17.58 | 27.72 | 23.58 |
| GCHFR      | 19.31 | 19.36 | 18.82 | 16.96 | 17.49 | 17.59 | 14.49 | 16.33 |
| TRIO       | 17.48 | 16.55 | 17.35 | 18.23 | 16.94 | 17.59 | 19.09 | 17.9  |
| FAM104A    | 17.13 | 16.48 | 17.17 | 17.12 | 16.69 | 17.59 | 16.55 | 18.27 |
| RFC4       | 17.11 | 15.65 | 18.93 | 20.45 | 18.67 | 17.59 | 21.85 | 19.05 |
| EEFSEC     | 20.31 | 21.49 | 19.81 | 17.76 | 15.95 | 17.6  | 13.96 | 13.79 |
| GNAI1      | 16.64 | 16.01 | 17.98 | 20.04 | 19.57 | 17.6  | 27.48 | 24.92 |
| PJA1       | 20.01 | 19.72 | 18.57 | 18.5  | 17.59 | 17.62 | 18.94 | 18.76 |
| PCDH85     | 20.21 | 19.68 | 20.12 | 20.54 | 16.9  | 17.64 | 16.69 | 16.51 |
| TRIM44     | 17.33 | 17.41 | 19.24 | 19.78 | 19.62 | 17.64 | 22.45 | 21.23 |
| TMEM35B    | 18.61 | 17.49 | 18.74 | 19.92 | 17.84 | 17.65 | 17.26 | 16.67 |
| CHIC2      | 13.13 | 11.66 | 13.19 | 14.36 | 11.99 | 17.66 | 13.58 | 13.96 |
| STX1A      | 19.35 | 18.67 | 19.39 | 20.28 | 19.75 | 17.67 | 17.34 | 17.08 |
| METTL3     | 18.47 | 17.21 | 17.23 | 17.46 | 16.87 | 17.67 | 20.04 | 17.63 |
| SRP54      | 17.11 | 15.47 | 18.5  | 20.53 | 17.44 | 17.69 | 26.15 | 22.07 |
| PTPMT1     | 18.27 | 16.92 | 16.77 | 17.06 | 16.32 | 17.7  | 15.79 | 16.32 |
| SESN2      | 16.7  | 17.2  | 16.43 | 14.73 | 17.11 | 17.71 | 15.48 | 15.86 |
| MLH1       | 17.64 | 16.35 | 17.52 | 17.34 | 18.01 | 17.71 | 19.81 | 18.16 |
| GLRX       | 15.91 | 17.77 | 17.02 | 15.26 | 17.3  | 17.71 | 18.63 | 18.94 |
| PRPSAP2    | 17.06 | 16.74 | 17.46 | 16.59 | 18.25 | 17.72 | 20.45 | 19.46 |
| LYRM1      | 16.98 | 14.71 | 16.83 | 16.03 | 18.98 | 17.72 | 23.01 | 20.39 |
| ARAP3      | 17.38 | 18.26 | 18.43 | 17.21 | 16.62 | 17.73 | 16.25 | 16.48 |
| ZFAND1     | 18.2  | 17.62 | 16.31 | 16.16 | 18.93 | 17.73 | 24.32 | 22.7  |
| PARD6G     | 18.24 | 16.72 | 17.34 | 16.9  | 17.38 | 17.74 | 14.84 | 15.27 |
| PNMA1      | 17.42 | 15.94 | 17.82 | 18.04 | 18.27 | 17.74 | 17.3  | 18.57 |
| JKAMP      | 16.49 | 17.95 | 17.86 | 20.54 | 20.29 | 17.74 | 28.04 | 23.49 |
| EHD4       | 19.62 | 20.32 | 19.14 | 18.46 | 18.85 | 17.75 | 16.23 | 16.41 |
| USO1       | 14.7  | 13.93 | 16.52 | 18.7  | 18.29 | 17.76 | 27.87 | 24.28 |
| RPF1       | 15.69 | 14.82 | 16.56 | 18.71 | 18.49 | 17.77 | 22.54 | 19.24 |
| PJA2       | 16.12 | 14.67 | 19.67 | 21.57 | 17.8  | 17.77 | 27.63 | 24.23 |
| PAPD7      | 16.66 | 16.5  | 17.29 | 19.35 | 18.4  | 17.78 | 20.69 | 18.75 |
| ARRDC2     | 14.84 | 13.45 | 13.95 | 14.58 | 17.64 | 17.79 | 16.19 | 16.27 |
| CLN6       | 18.04 | 17.41 | 18.86 | 16.51 | 18.21 | 17.8  | 16.57 | 16.45 |
| ARPC5L     | 16.15 | 14.85 | 15.12 | 15.42 | 17.01 | 17.81 | 17.27 | 17.66 |
| DDX11      | 15.89 | 15.32 | 15.18 | 15.87 | 18.38 | 17.82 | 19.63 | 17.85 |
| CUL7       | 22.18 | 21.06 | 20.66 | 20.2  | 16.93 | 17.83 | 15.34 | 15.61 |
| MRC2       | 32    | 33.43 | 30.7  | 28.33 | 15.56 | 17.83 | 14.27 | 15.69 |
| KAT8       | 18.99 | 20.46 | 16.31 | 16.27 | 18.98 | 17.84 | 15.48 | 16.38 |
| CCDC97     | 18.84 | 20.43 | 17.83 | 16.25 | 18.39 | 17.84 | 15.25 | 17.02 |
| SUCLG2     | 16.61 | 13.93 | 16.79 | 17.93 | 18.7  | 17.84 | 21.6  | 20.73 |
| MAN2B2     | 17.03 | 17.05 | 17.03 | 16.54 | 15.41 | 17.85 | 15.79 | 16.13 |
| LARP6      | 19.28 | 19.92 | 18.4  | 19.1  | 18.19 | 17.85 | 17.92 | 17.95 |
| DVL2       | 18.02 | 19.9  | 17.39 | 17.09 | 17.1  | 17.86 | 13.79 | 15.26 |
| AACS       | 16.73 | 18.29 | 17.58 | 16.14 | 16.35 | 17.86 | 14.5  | 15.88 |
| DYNC1LI1   | 15.38 | 15.01 | 15.6  | 16.15 | 17.65 | 17.86 | 20.47 | 19.99 |
| ZER1       | 17.21 | 17.62 | 17.1  | 16.58 | 16    | 17.87 | 13.81 | 15.48 |
| CYB5R1     | 18.07 | 20.11 | 17.82 | 17.52 | 18.75 | 17.88 | 17.67 | 19.25 |
| FAM96A     | 16.95 | 16    | 15.71 | 16.92 | 19.03 | 17.88 | 23.04 | 20.53 |
| MRPL33     | 19.61 | 18.66 | 15.48 | 17.73 | 20.77 | 17.88 | 22.79 | 21.34 |
| UBE2F      | 13.26 | 14.12 | 14.84 | 14.73 | 17.99 | 17.89 | 20.73 | 19.76 |
| CRYZ       | 17.84 | 17.26 | 19.31 | 21.36 | 19.69 | 17.89 | 29.12 | 23.9  |
| EHMT1      | 18.89 | 19.34 | 18.09 | 18.53 | 18.14 | 17.9  | 16.07 | 17.68 |
| TMCO1      | 18.53 | 17.82 | 18.71 | 19.19 | 19.99 | 17.9  | 22.06 | 21.89 |
| ATP6V1D    | 16.41 | 16.83 | 17.18 | 17.89 | 17.93 | 17.91 | 20.97 | 19.94 |
| EFNA4      | 21.79 | 20.91 | 18.32 | 19.32 | 18.21 | 17.92 | 14.32 | 15.24 |
| GTPBP2     | 20.39 | 18.97 | 17.77 | 18.8  | 18.65 | 17.92 | 17.61 | 18.49 |
| CMTR1      | 21.91 | 22.13 | 20.55 | 19.47 | 18.05 | 17.94 | 16.82 | 16.64 |
| PFKFB3     | 19.19 | 18.93 | 19.04 | 18.6  | 17.27 | 17.95 | 17.31 | 17.37 |
| RNF26      | 18.45 | 18.58 | 16.31 | 15.86 | 18.87 | 17.96 | 14.37 | 16.86 |
| FCGRT      | 21.09 | 25.44 | 21.45 | 18.95 | 17.47 | 17.97 | 14.62 | 15.03 |
| KMT5A      | 14.09 | 14.28 | 16.08 | 16.41 | 16.27 | 17.97 | 17.94 | 18.17 |
| CNOT8      | 14.81 | 14.47 | 15.41 | 16.63 | 16.43 | 17.97 | 20.4  | 19.1  |
| NUDT16     | 14.04 | 15.62 | 16.4  | 15.43 | 17.11 | 17.99 | 14.45 | 14.91 |
| GLI4       | 16.34 | 14.29 | 14.73 | 15.12 | 18.07 | 17.99 | 14.74 | 15.77 |
| GOLIM4     | 16.9  | 16.18 | 18.84 | 23.2  | 19.65 | 17.99 | 27.88 | 24.13 |
| TTC3       | 14.74 | 13.97 | 18.04 | 22.48 | 17.15 | 17.99 | 29.04 | 26.11 |
| SIRT3      | 18.72 | 19.25 | 17.68 | 17.49 | 17.09 | 18    | 16.3  | 16.51 |
| AFMID      | 16.34 | 15.07 | 16.54 | 16.13 | 17.21 | 18    | 17.98 | 18.34 |
| HDDC2      | 17.29 | 17.86 | 18.65 | 17.88 | 18.87 | 18    | 19.91 | 18.89 |
| WDR83      | 18.2  | 17.19 | 16.01 | 14.2  | 17.03 | 18.01 | 13.57 | 14.5  |
| MMP11      | 23.55 | 23.04 | 23.02 | 21.77 | 18.36 | 18.01 | 12.89 | 15.12 |
| MECR       | 15.96 | 17.81 | 16.29 | 15.81 | 18.43 | 18.01 | 15.34 | 17.28 |
| PPP1R37    | 17.76 | 17.46 | 16.62 | 14.73 | 16.38 | 18.03 | 12.82 | 14.43 |
| MRRF       | 15    | 14.76 | 16.52 | 14.64 | 17.93 | 18.03 | 19.93 | 20.08 |
| YIPF1      | 17.53 | 18.74 | 18.02 | 18.19 | 18.26 | 18.04 | 19.74 | 17.28 |
| NXF1       | 17.26 | 17.68 | 17.42 | 17.29 | 19.36 | 18.05 | 20.13 | 18.36 |
| ST6GALNAC6 | 17.23 | 20.4  | 18.64 | 18.2  | 18.28 | 18.05 | 17    | 18.58 |

|           |       |       |       |       |       |       |       |       |
|-----------|-------|-------|-------|-------|-------|-------|-------|-------|
| ZSWIM8    | 16.66 | 17.27 | 17.19 | 16.22 | 16.73 | 18.06 | 15.55 | 16.85 |
| DMRTA2    | 19.87 | 18.56 | 17.62 | 17.2  | 16.61 | 18.07 | 14.55 | 14.39 |
| MAD1L1    | 19.19 | 19.04 | 18.36 | 17.62 | 17.67 | 18.07 | 14.9  | 15.83 |
| XPR1      | 15.18 | 14.66 | 16.72 | 18.53 | 18.43 | 18.07 | 24.23 | 22.54 |
| OGFOD1    | 16.77 | 16.73 | 17.44 | 17.83 | 19.26 | 18.08 | 21.16 | 18.09 |
| NFATC2IP  | 17.82 | 17.17 | 16.91 | 17.81 | 18.91 | 18.08 | 21.51 | 19.8  |
| NCBP1     | 14.97 | 12.39 | 16.91 | 18.69 | 19.28 | 18.1  | 24.34 | 20.84 |
| CCDC167   | 16.81 | 16.58 | 17.23 | 14.82 | 18.16 | 18.11 | 14.57 | 15.4  |
| CERK      | 15.41 | 15.18 | 15.07 | 14.61 | 17.45 | 18.11 | 16.6  | 17.96 |
| QSOX2     | 13.57 | 13.93 | 14.09 | 14.71 | 17.18 | 18.12 | 18.15 | 17.92 |
| PDCD6IP   | 16.8  | 15.4  | 18.65 | 18.86 | 19.46 | 18.12 | 26.76 | 22.79 |
| MIB1      | 16.65 | 14.87 | 18.61 | 21.35 | 16.71 | 18.12 | 25.25 | 23.78 |
| TRRAP     | 18.29 | 18.42 | 18.57 | 18.81 | 17.23 | 18.13 | 18.54 | 17.96 |
| ITGB3BP   | 18.57 | 18.09 | 19.98 | 18.78 | 21.12 | 18.13 | 25.45 | 22.51 |
| JAGN1     | 21.99 | 18.85 | 19.74 | 16.71 | 17.44 | 18.14 | 17.71 | 17.46 |
| ATP6V0A1  | 15.37 | 15.5  | 15.38 | 15.98 | 17.87 | 18.14 | 18.79 | 18.82 |
| TWF1      | 17.17 | 16.62 | 17.59 | 18.42 | 18.78 | 18.14 | 28.02 | 23.65 |
| EHD1      | 18.62 | 18.93 | 17.57 | 16.73 | 17.46 | 18.16 | 13.63 | 14.92 |
| TBC1D1    | 17.37 | 16.72 | 17.41 | 16.82 | 18.66 | 18.16 | 18.36 | 17.97 |
| SDHD      | 17.02 | 14.58 | 15.49 | 18.04 | 17.8  | 18.16 | 23.5  | 20.64 |
| LOXL2     | 26.02 | 25.55 | 23.63 | 24    | 17.46 | 18.18 | 15.57 | 16.75 |
| ZNF337    | 15.13 | 14.13 | 17.26 | 19.53 | 17.49 | 18.18 | 26.04 | 21.94 |
| QPCTL     | 17.31 | 16.82 | 15.51 | 15.84 | 15.53 | 18.19 | 12.85 | 16.23 |
| GFM2      | 15.95 | 15.6  | 15.74 | 17.81 | 19.39 | 18.19 | 23.67 | 20.93 |
| ANAPC16   | 18.23 | 17.35 | 18.02 | 18.74 | 18.72 | 18.2  | 19.26 | 18.57 |
| JMJD4     | 15.8  | 16.17 | 15.4  | 15.04 | 15.89 | 18.21 | 12.7  | 13.56 |
| PPHLN1    | 15.75 | 15.64 | 16.6  | 18.55 | 18.95 | 18.21 | 25.23 | 21.64 |
| SLU7      | 15.1  | 14.35 | 18.27 | 20.31 | 19.03 | 18.21 | 26.99 | 21.83 |
| SYS1      | 13.95 | 13.76 | 13.12 | 12.01 | 17.08 | 18.22 | 15.6  | 15.59 |
| ARHGFE2   | 21.97 | 22.94 | 22.6  | 21.55 | 17.56 | 18.22 | 16.59 | 18.4  |
| EHD3      | 18    | 17.66 | 17.53 | 17.12 | 17.51 | 18.23 | 15.64 | 17.09 |
| ZC3HC1    | 16.48 | 17.25 | 16.61 | 14.44 | 18    | 18.23 | 17.86 | 17.88 |
| NUP133    | 16.24 | 14.82 | 16.53 | 17.33 | 17.74 | 18.23 | 21.75 | 19.53 |
| CBFB      | 15.51 | 14.48 | 17.93 | 20.11 | 18.59 | 18.23 | 22.51 | 21.57 |
| PALMD     | 18.23 | 17.03 | 18.37 | 20.32 | 18.52 | 18.23 | 23.82 | 23.39 |
| FADD      | 18    | 18.78 | 19.13 | 15.43 | 17.83 | 18.24 | 15.43 | 15.48 |
| NSMCE2    | 15.53 | 15.41 | 14.81 | 16.77 | 19.21 | 18.24 | 20.39 | 17.06 |
| HOOK2     | 16.17 | 18.78 | 17.72 | 18    | 18.84 | 18.24 | 17.64 | 19.4  |
| AHDC1     | 20.54 | 19.89 | 19.93 | 19.25 | 17.03 | 18.25 | 14.41 | 16.26 |
| RILPL1    | 16.46 | 16.74 | 16.17 | 17.11 | 19.69 | 18.25 | 16.67 | 17.92 |
| PARN      | 16.48 | 16.51 | 18.55 | 19.26 | 18.51 | 18.25 | 21.93 | 20.74 |
| EIF1AX    | 15.58 | 14.86 | 17.13 | 18.2  | 19.65 | 18.26 | 26.34 | 22.75 |
| NTMT1     | 19.62 | 19.31 | 17.36 | 16.96 | 18.75 | 18.27 | 13.69 | 15.88 |
| HIST3H2A  | 16.94 | 14.79 | 19.3  | 15.84 | 15.99 | 18.28 | 14.11 | 11.17 |
| NUP37     | 15.02 | 15.6  | 16.4  | 16.33 | 16.98 | 18.28 | 21.63 | 16.31 |
| HIST1H2BK | 21.53 | 23.65 | 24.02 | 21.03 | 18.61 | 18.28 | 18.13 | 16.95 |
| IPO13     | 15.73 | 16.14 | 15.58 | 14.94 | 17.84 | 18.28 | 16.62 | 16.99 |
| MRPS35    | 17.93 | 17.29 | 18.33 | 19.01 | 19.82 | 18.28 | 26.53 | 22.52 |
| RMND5B    | 16.53 | 16.69 | 16.09 | 14.3  | 15.98 | 18.29 | 15.17 | 14.23 |
| BCAS3     | 18.91 | 17.82 | 19.54 | 19.12 | 16.97 | 18.29 | 16.63 | 17    |
| HTATSF1   | 16.82 | 14.3  | 17.3  | 19.58 | 18.82 | 18.29 | 22.65 | 21.42 |
| CCDC115   | 21.22 | 18.7  | 19.57 | 17.56 | 18.95 | 18.31 | 16.83 | 15.74 |
| PHRF1     | 19.49 | 19.64 | 19.09 | 17.37 | 17.95 | 18.31 | 14.9  | 16.31 |
| PALLD     | 19.27 | 18.18 | 19    | 19.49 | 19.43 | 18.32 | 21.15 | 19.29 |
| UBAP1     | 18.27 | 17.09 | 17.91 | 19.34 | 17.6  | 18.33 | 17.13 | 18.42 |
| FSTL1     | 20.62 | 19.3  | 21.1  | 22.33 | 19.6  | 18.33 | 22.75 | 21.39 |
| MORC2     | 18.95 | 19.98 | 19.51 | 19.94 | 17.03 | 18.34 | 17.82 | 19.42 |
| PHF19     | 16.77 | 16.01 | 16.38 | 16.21 | 18.32 | 18.35 | 17.05 | 14.91 |
| SCLY      | 15.64 | 15.85 | 16.35 | 15.13 | 18.88 | 18.35 | 16.5  | 15.36 |
| RARS2     | 16.48 | 15.84 | 14.36 | 17.05 | 17.42 | 18.35 | 20.68 | 18.24 |
| MED29     | 20.02 | 18.48 | 19.19 | 18.96 | 18.63 | 18.36 | 17.47 | 16.69 |
| ST3GAL2   | 19.52 | 20.54 | 19.55 | 18.74 | 17.55 | 18.37 | 14.27 | 16.33 |
| HCFC1     | 19.33 | 19.84 | 17.97 | 18.54 | 17.36 | 18.37 | 14.75 | 17.38 |
| R3HDM2    | 17.19 | 17.08 | 17.61 | 19.58 | 18.07 | 18.37 | 19.89 | 20.37 |
| STXBP1    | 17.31 | 18.47 | 17.46 | 17.37 | 17.31 | 18.38 | 16.69 | 17.74 |
| SH3GLB1   | 16.75 | 16.7  | 19.46 | 17.93 | 16.6  | 18.38 | 20.22 | 20.6  |
| TEAD1     | 14.88 | 13.13 | 17.72 | 21.65 | 19.21 | 18.38 | 29.53 | 25.32 |
| MSH6      | 21.49 | 19.36 | 22.22 | 23.87 | 19.85 | 18.39 | 25.42 | 23.49 |
| CABIN1    | 18.94 | 18.81 | 19.17 | 18.77 | 17.52 | 18.4  | 15.68 | 17.56 |
| DHX16     | 18.09 | 19.29 | 18.3  | 18.93 | 18.41 | 18.4  | 18.29 | 17.59 |
| AMOTL1    | 18.6  | 17.47 | 18.56 | 17.55 | 18.67 | 18.44 | 18.8  | 17.13 |
| FOSL1     | 18.21 | 16.38 | 16.61 | 14.42 | 18.3  | 18.44 | 16.06 | 17.75 |
| CDK2      | 20.73 | 19.45 | 19.91 | 21.42 | 19.01 | 18.44 | 19.98 | 20.63 |
| YPEL5     | 17    | 16.84 | 18.43 | 19.44 | 20.46 | 18.44 | 22.94 | 22.27 |
| TESK1     | 19.12 | 19.49 | 17.66 | 17.3  | 17.15 | 18.45 | 15.82 | 17.07 |
| PABPN1    | 19.99 | 18.08 | 18.44 | 19.57 | 18.99 | 18.45 | 15.02 | 17.27 |
| TMEM167A  | 17.41 | 17.41 | 18.44 | 21.44 | 19.25 | 18.45 | 27.5  | 25.32 |
| DKK1      | 9.11  | 8.28  | 10.93 | 10.97 | 21.01 | 18.46 | 24.39 | 18.5  |
| ARID1A    | 18.53 | 18    | 18.68 | 19.72 | 17.41 | 18.46 | 18.16 | 18.95 |
| BRD8      | 15.93 | 15.61 | 16    | 16.86 | 19.37 | 18.46 | 22.31 | 19.79 |
| NT5C2     | 17.13 | 15.66 | 17.3  | 20.59 | 18.75 | 18.46 | 23.77 | 20.9  |
| ELMO2     | 18.89 | 18.67 | 19.13 | 18.65 | 18.62 | 18.48 | 20.31 | 19.01 |
| CLDND1    | 16.41 | 17.15 | 19.58 | 22.54 | 21.06 | 18.48 | 29.52 | 25.37 |
| ALG1      | 16.93 | 16.28 | 16.33 | 15.31 | 17.62 | 18.49 | 17.69 | 15.77 |
| TAF1D     | 13.45 | 13.95 | 14.81 | 17.54 | 16.54 | 18.51 | 29.89 | 23.45 |
| HSD17B8   | 19.56 | 20.63 | 18.09 | 18.79 | 19.05 | 18.52 | 14.01 | 14.87 |

|         |       |       |       |       |       |       |       |       |
|---------|-------|-------|-------|-------|-------|-------|-------|-------|
| SMIM11B | 15.79 | 14.96 | 15.3  | 15.16 | 15.94 | 18.52 | 15.64 | 15.57 |
| MBD1    | 17.44 | 14.76 | 16.42 | 17.38 | 17.07 | 18.52 | 17.03 | 16.79 |
| GLOD4   | 16.59 | 15.81 | 15.67 | 15.25 | 18.07 | 18.53 | 17.1  | 16.73 |
| MINOS1  | 17.82 | 18.4  | 18    | 18.04 | 19.2  | 18.54 | 21.18 | 19.88 |
| SLC10A3 | 19.63 | 20.25 | 17.06 | 17.09 | 18.78 | 18.55 | 14.96 | 16.82 |
| SYT11   | 16.9  | 16.62 | 16.13 | 16.59 | 19.84 | 18.55 | 18.27 | 19.08 |
| RAB11A  | 17.69 | 18.24 | 18.59 | 19.05 | 18.38 | 18.55 | 21.13 | 20.45 |
| RTCA    | 15.79 | 16.13 | 17.59 | 19.82 | 19.32 | 18.57 | 24.43 | 20.81 |
| XXYL1   | 18.79 | 18.23 | 17.99 | 19.51 | 19.42 | 18.58 | 17.67 | 18.64 |
| 44447   | 17.94 | 18.04 | 17.73 | 18.85 | 18.12 | 18.58 | 18.31 | 18.99 |
| YLPM1   | 19.83 | 19.88 | 20.03 | 21.57 | 18.81 | 18.6  | 21.23 | 21.55 |
| RASSF10 | 17.97 | 16.03 | 16.81 | 17.03 | 16.98 | 18.61 | 14.28 | 15.86 |
| ATAD1   | 14.8  | 16.27 | 18.19 | 18.83 | 20.06 | 18.61 | 27.35 | 22    |
| SEMA4F  | 18.51 | 20.29 | 18.95 | 17.87 | 17.47 | 18.63 | 16.31 | 17.03 |
| TMEM8B  | 20.19 | 20.41 | 19.18 | 19.6  | 18.83 | 18.63 | 16.48 | 19.03 |
| PITPNA  | 18.34 | 19.16 | 17.89 | 18.3  | 19.12 | 18.64 | 18.86 | 17.62 |
| ZNF414  | 19.88 | 19.01 | 17.14 | 18.12 | 17.8  | 18.65 | 12.99 | 14.68 |
| REXO4   | 15.98 | 17.47 | 17.31 | 16.86 | 19.32 | 18.65 | 17.1  | 17.98 |
| BTG3    | 16.41 | 14.41 | 17.47 | 17.68 | 22.7  | 18.66 | 26.6  | 20.97 |
| MFHAS1  | 19.33 | 17.89 | 19.42 | 17.54 | 16.66 | 18.67 | 15.32 | 17.28 |
| MTFR1L  | 14.81 | 16.4  | 15.43 | 14.84 | 18.66 | 18.68 | 18.31 | 18.41 |
| PFDN4   | 16.8  | 17.85 | 17.68 | 17.92 | 20.75 | 18.69 | 25.01 | 22.23 |
| SMN1    | 15.45 | 19.37 | 20.47 | 19.48 | 22.08 | 18.69 | 27.36 | 22.48 |
| MCM3AP  | 18.14 | 18.18 | 18.03 | 18.57 | 19.51 | 18.7  | 18.09 | 18.68 |
| ASTN2   | 14.35 | 13.73 | 17.73 | 21.62 | 16.13 | 18.7  | 31.8  | 28.73 |
| KCTD5   | 17.96 | 17.08 | 19.07 | 17.49 | 19.22 | 18.74 | 16.12 | 16.35 |
| ZNF385D | 19.43 | 17.45 | 18.49 | 21.6  | 19.31 | 18.74 | 21.69 | 20.79 |
| CTXN1   | 17.56 | 17.81 | 16.39 | 15.22 | 18.69 | 18.76 | 10.79 | 15.44 |
| PORCN   | 15.36 | 16.73 | 15.41 | 14.71 | 18.27 | 18.77 | 16.76 | 17.18 |
| FBXL18  | 17.81 | 17.73 | 16.83 | 16.1  | 18.53 | 18.77 | 16.55 | 18.62 |
| PPP3CB  | 16.55 | 15.39 | 15.82 | 17.07 | 19.72 | 18.78 | 22.25 | 20.35 |
| RALBP1  | 16.68 | 16.04 | 16.52 | 17.16 | 20.14 | 18.78 | 20.21 | 20.39 |
| GTSF1   | 21.76 | 23.91 | 23.72 | 22.2  | 21.82 | 18.79 | 21.63 | 21.27 |
| HMGXB3  | 18.07 | 19.31 | 17.37 | 17.69 | 19.29 | 18.8  | 17.46 | 18.14 |
| FBXW11  | 18.11 | 17.18 | 18.93 | 19    | 20.41 | 18.8  | 21.77 | 21    |
| PCDH7   | 18.8  | 16.55 | 19.2  | 19.65 | 17.38 | 18.81 | 17.78 | 18.98 |
| FGFR1   | 21.12 | 22.76 | 20.02 | 20.97 | 16.3  | 18.82 | 16.11 | 17.04 |
| MGRN1   | 17.13 | 18.16 | 18.1  | 17.11 | 18.25 | 18.82 | 14.55 | 17.29 |
| APEX2   | 20.61 | 21.88 | 18.58 | 19.94 | 19.78 | 18.83 | 18.15 | 16.52 |
| TGFA    | 21.84 | 20.13 | 21.07 | 21.87 | 19.96 | 18.83 | 21.18 | 18.63 |
| UBE2N   | 17.39 | 15.72 | 17.49 | 19.85 | 18.46 | 18.83 | 22.39 | 19.99 |
| DBNDD1  | 18.58 | 18.14 | 17.51 | 17.63 | 17.7  | 18.84 | 15.72 | 17.57 |
| ALDH3A2 | 16.33 | 15.85 | 17.08 | 16.7  | 18.7  | 18.84 | 21.34 | 20.1  |
| C14orf1 | 19.73 | 20.03 | 21.22 | 20.79 | 19.38 | 18.84 | 19.99 | 20.12 |
| CHKB    | 18.13 | 20.24 | 18.45 | 17.81 | 18.54 | 18.85 | 20    | 18.44 |
| CXCL8   | 14    | 15.28 | 16.6  | 16.46 | 22.69 | 18.85 | 30.08 | 22.48 |
| ARRB2   | 15.71 | 17.29 | 16.55 | 16.02 | 17.66 | 18.86 | 15.41 | 17.98 |
| IL10RB  | 20.3  | 21.7  | 20.4  | 19.34 | 19.29 | 18.87 | 19.62 | 19.77 |
| SNAP23  | 17.23 | 15.96 | 18.94 | 20.45 | 19.86 | 18.87 | 23.42 | 22.11 |
| COQ4    | 15.99 | 17.28 | 15.38 | 16.98 | 18.67 | 18.91 | 14.72 | 17.34 |
| SLC37A2 | 19.53 | 20.12 | 19.67 | 20.08 | 17.16 | 18.91 | 18.85 | 17.9  |
| PRPS1   | 18.39 | 18.3  | 18.25 | 18.69 | 19.13 | 18.91 | 20.42 | 17.98 |
| PHF13   | 21.13 | 22.37 | 20.63 | 20.17 | 20.16 | 18.92 | 17.75 | 19.7  |
| NNT     | 16.41 | 14.87 | 17.02 | 17.74 | 19.19 | 18.92 | 22.01 | 19.88 |
| ITPK1   | 17.19 | 18.62 | 16.44 | 16.05 | 17.78 | 18.93 | 14.78 | 15.38 |
| OPTN    | 17.27 | 17.35 | 18.84 | 19.79 | 20.29 | 18.93 | 23.05 | 21.95 |
| HGSNAT  | 19.39 | 19.06 | 20.11 | 20.69 | 19.04 | 18.94 | 21.2  | 20.1  |
| EPDR1   | 19.75 | 19.39 | 18.83 | 20.97 | 19.31 | 18.95 | 18.21 | 18.99 |
| RSAD1   | 17.26 | 17.34 | 17.3  | 17.78 | 19.63 | 18.95 | 19.84 | 19.76 |
| PRPF38B | 15.29 | 14.68 | 17.28 | 21.28 | 18.33 | 18.95 | 24.99 | 22.99 |
| PRKRIP1 | 17.55 | 19.34 | 17.52 | 17.4  | 19.64 | 18.96 | 18.82 | 18.22 |
| VHL     | 20.02 | 19.1  | 19.8  | 19.91 | 19.4  | 18.96 | 20.22 | 19.1  |
| MAGT1   | 20.7  | 19.06 | 21.63 | 22.98 | 19.59 | 18.96 | 23.95 | 23.2  |
| TEN1    | 17.5  | 18.5  | 17.54 | 16.35 | 17.23 | 18.97 | 15.68 | 14.65 |
| GGCX    | 16.93 | 18.39 | 17.44 | 16.31 | 17.97 | 18.98 | 15.37 | 16.39 |
| CHCHD6  | 19.77 | 19.59 | 18.52 | 16.58 | 21.32 | 18.98 | 18.06 | 16.86 |
| NDUFV3  | 16.43 | 16.9  | 16.86 | 17.23 | 18.41 | 18.98 | 17.59 | 18.13 |
| UBR5    | 17.66 | 16.22 | 19.02 | 21.21 | 19.11 | 18.98 | 24.26 | 23.06 |
| DGCR14  | 16.74 | 15.61 | 16.15 | 14.37 | 18.68 | 18.99 | 15.64 | 15.65 |
| BCL9L   | 20.38 | 21.64 | 20.52 | 21.48 | 17.15 | 19    | 15.18 | 17.61 |
| NEK9    | 18.41 | 19.23 | 20.5  | 19.94 | 19.42 | 19    | 22.35 | 21.35 |
| RAB5B   | 19.7  | 20.87 | 19.16 | 20.35 | 19.24 | 19.01 | 19.73 | 21.54 |
| FRG1    | 21.35 | 17.91 | 21.91 | 22.61 | 21.45 | 19.01 | 25.38 | 23.08 |
| HIP1    | 18.93 | 19.49 | 19.52 | 20.39 | 19.57 | 19.02 | 18.74 | 19.8  |
| SNRPA1  | 15.41 | 15.83 | 16.02 | 19.27 | 17.47 | 19.02 | 23.43 | 20.66 |
| SPRYD3  | 19.68 | 20.69 | 18.22 | 18.09 | 20.23 | 19.04 | 15.78 | 17.09 |
| ACAP3   | 18.55 | 17.44 | 17.18 | 15.82 | 18.33 | 19.06 | 17    | 17.64 |
| PRR11   | 17.23 | 15.34 | 17.85 | 17.58 | 19.45 | 19.06 | 20.82 | 20.79 |
| MBNL1   | 15.39 | 14.04 | 17.43 | 22.69 | 20.61 | 19.06 | 35.09 | 28.97 |
| HPS6    | 18.29 | 17.86 | 17.43 | 16.08 | 17.25 | 19.07 | 12.83 | 14.49 |
| GMNN    | 18.49 | 18.58 | 19.6  | 18.86 | 21.46 | 19.08 | 25.14 | 21.93 |
| RHOB    | 17.19 | 16.91 | 17.42 | 14.45 | 16.56 | 19.09 | 14.65 | 15.74 |
| TLDC1   | 20.41 | 20.08 | 19.43 | 18.21 | 19.65 | 19.09 | 16.04 | 17.49 |
| DTNB    | 18.29 | 20.09 | 20.12 | 21.13 | 18.22 | 19.09 | 22.51 | 21.15 |
| MPDU1   | 17.97 | 19.02 | 18.88 | 17.29 | 19.03 | 19.1  | 15.22 | 18.95 |
| ANO1    | 18.38 | 18.68 | 18.93 | 21.14 | 18.35 | 19.12 | 19.32 | 18.73 |
| ABHD16A | 19.63 | 17.85 | 18.28 | 17.67 | 18.25 | 19.12 | 15.99 | 18.89 |
| FRMD8   | 19.95 | 20.6  | 17.49 | 17.56 | 16.21 | 19.13 | 15.57 | 16.61 |
| IFT52   | 19.7  | 18.92 | 19.77 | 19.42 | 18.59 | 19.13 | 21.95 | 19.9  |

|          |       |       |       |       |       |       |       |       |
|----------|-------|-------|-------|-------|-------|-------|-------|-------|
| CEBPZOS  | 17.67 | 16.02 | 18.17 | 19.07 | 21.15 | 19.13 | 24.65 | 25.94 |
| NUDT2    | 17.04 | 17.33 | 17.08 | 16.48 | 18.98 | 19.14 | 18.69 | 20.25 |
| IGF2BP3  | 19.15 | 15.78 | 19.72 | 22.64 | 19.89 | 19.16 | 29.01 | 23.78 |
| TTI1     | 19.56 | 19.28 | 18.94 | 19.62 | 20.28 | 19.17 | 21.92 | 19.77 |
| NDUFAF2  | 19.36 | 19.24 | 16.28 | 16.78 | 24.94 | 19.17 | 24.01 | 20.66 |
| PRKRA    | 14.5  | 15.14 | 16.78 | 15.5  | 20.38 | 19.17 | 24.62 | 21.34 |
| CENPN    | 14.65 | 14.45 | 13.89 | 15.52 | 17.15 | 19.18 | 18.9  | 17.17 |
| SLC20A2  | 18.18 | 16.63 | 16.38 | 18.17 | 18.82 | 19.18 | 18.51 | 19.05 |
| CCDC74A  | 18.95 | 18.19 | 19.63 | 17.81 | 17.46 | 19.19 | 18.56 | 18.4  |
| ENTPD4   | 17.01 | 16.64 | 19.14 | 21.05 | 19.33 | 19.19 | 25.93 | 23.51 |
| DAPK3    | 19.87 | 19.28 | 19.23 | 18.13 | 18.35 | 19.2  | 13.09 | 16    |
| PATZ1    | 20.49 | 20.94 | 19.85 | 19.04 | 18.13 | 19.2  | 15.79 | 17.13 |
| RHBDD3   | 20.29 | 19.27 | 18.8  | 18.05 | 18.88 | 19.2  | 17.21 | 18.86 |
| ZFAND6   | 17.86 | 18.05 | 21.54 | 22.86 | 18.74 | 19.2  | 25.69 | 25.16 |
| PAPSS1   | 19.23 | 19.54 | 20.65 | 19.78 | 20.21 | 19.22 | 21.97 | 20.7  |
| RING1    | 23.84 | 22.91 | 21.78 | 20.79 | 19.02 | 19.23 | 16.96 | 17.11 |
| HECTD3   | 17.92 | 17.27 | 17.95 | 17.61 | 18.26 | 19.23 | 16.78 | 18.36 |
| GLE1     | 16.81 | 16.88 | 17.67 | 17.84 | 19.71 | 19.23 | 18.08 | 18.39 |
| TSSC1    | 18.82 | 18.71 | 19.93 | 17.06 | 21.05 | 19.23 | 16.93 | 18.48 |
| SHISA2   | 19.85 | 20.56 | 20.19 | 22.16 | 17.27 | 19.23 | 19.98 | 20.48 |
| RBBP8    | 17.67 | 18.06 | 20.43 | 21.22 | 19.81 | 19.23 | 30.44 | 25.77 |
| SRRM1    | 19.73 | 20.51 | 20.93 | 24.51 | 20.83 | 19.26 | 25.89 | 24.79 |
| TMEM223  | 21.2  | 20.39 | 20.39 | 18.07 | 18.69 | 19.27 | 15.48 | 18.89 |
| SRCAP    | 18.7  | 19.27 | 18.61 | 19.45 | 18.96 | 19.29 | 18.1  | 19.59 |
| SH3BP4   | 20.7  | 22.53 | 22.73 | 21.84 | 19.51 | 19.29 | 19.44 | 19.63 |
| EIF2AK4  | 17.93 | 16.92 | 18.8  | 18.91 | 19.23 | 19.29 | 21.5  | 20    |
| UBE2G2   | 16.8  | 16.46 | 17.2  | 18.22 | 19.02 | 19.29 | 25.53 | 23.14 |
| PARP10   | 23.19 | 20.13 | 20.51 | 19.96 | 18.85 | 19.3  | 16.47 | 15.2  |
| UBE2O    | 20.68 | 21.2  | 20.93 | 19.84 | 18.26 | 19.3  | 16.28 | 17.2  |
| HBE1     | 21.58 | 21.78 | 19.44 | 19.36 | 16.94 | 19.3  | 16.58 | 19.19 |
| PRPF4    | 19.37 | 20.22 | 18.47 | 19.54 | 20.83 | 19.3  | 21.25 | 19.41 |
| RNF215   | 19.04 | 18.6  | 16.74 | 17.73 | 18.11 | 19.31 | 17.41 | 17.21 |
| ANAPC2   | 19.16 | 18.98 | 18.63 | 16.99 | 19.82 | 19.32 | 16.31 | 17    |
| NMRK1    | 20.57 | 20.14 | 21.05 | 21.87 | 21.1  | 19.32 | 27.36 | 24.29 |
| ZNF579   | 21.29 | 22.44 | 19.86 | 18.54 | 17.79 | 19.33 | 12.82 | 14.46 |
| MUS81    | 17.76 | 17.58 | 17.44 | 15.67 | 18    | 19.33 | 15.16 | 16.34 |
| LPAR1    | 19.71 | 17.77 | 21.49 | 22.69 | 20.38 | 19.33 | 26.68 | 22.57 |
| CDK7     | 16.44 | 17.84 | 17.68 | 19.79 | 20.58 | 19.34 | 26.4  | 21.36 |
| TATDN1   | 16.51 | 18.49 | 17.96 | 18.18 | 20.84 | 19.34 | 27.67 | 25.26 |
| PCMTD2   | 17.7  | 16.93 | 17.96 | 22.65 | 20.6  | 19.34 | 28.72 | 25.27 |
| SDK2     | 17.81 | 18.6  | 17.85 | 18.51 | 16.96 | 19.36 | 16.35 | 18.01 |
| TUT1     | 21.29 | 20.39 | 20.22 | 19    | 19.62 | 19.36 | 15.88 | 18.74 |
| DCAF13   | 16.12 | 16.95 | 17.69 | 17.39 | 20.21 | 19.36 | 25.23 | 22.96 |
| RNF13    | 17.46 | 17.21 | 18.74 | 20.46 | 19.61 | 19.36 | 29.81 | 25.66 |
| PPP1R8   | 16.49 | 17.22 | 19.04 | 16.13 | 17.19 | 19.37 | 19.39 | 18.31 |
| MTX2     | 17.79 | 17.14 | 17.15 | 18.91 | 19.07 | 19.38 | 22.11 | 20.45 |
| PITHD1   | 15.28 | 15.78 | 16.6  | 18.13 | 19.54 | 19.39 | 20.13 | 19.85 |
| RITA1    | 15.84 | 16.63 | 16.71 | 14.89 | 19.03 | 19.4  | 15.63 | 16.41 |
| RRS1     | 16.92 | 15.77 | 16.79 | 14.13 | 19.71 | 19.4  | 17.61 | 17.28 |
| SH3BP5L  | 18.19 | 18.69 | 18.75 | 16.87 | 17.94 | 19.4  | 16.29 | 17.35 |
| HDAC7    | 18.94 | 19.95 | 19.95 | 19.58 | 19.36 | 19.4  | 18.78 | 18.39 |
| DCAF12   | 17.67 | 18.58 | 19.72 | 19.08 | 20.21 | 19.4  | 19.3  | 20.5  |
| PKMYT1   | 20.24 | 17.6  | 19.93 | 16.49 | 20.56 | 19.41 | 14.45 | 14.04 |
| TYSND1   | 17.53 | 16.94 | 17.5  | 15.42 | 17.59 | 19.41 | 14.75 | 16.11 |
| ADPRHL2  | 22.46 | 22.69 | 20.25 | 19.28 | 20.18 | 19.41 | 16.65 | 18.33 |
| HDGFRP3  | 19.28 | 17.46 | 19.27 | 21.41 | 20.45 | 19.41 | 25.72 | 22.89 |
| DDX19A   | 17.13 | 17.35 | 16.75 | 16.73 | 19.89 | 19.42 | 18.88 | 18.17 |
| SYF2     | 17.62 | 19.45 | 18.38 | 19.88 | 22.24 | 19.42 | 27.57 | 24.22 |
| SMDT1    | 19.63 | 20.49 | 19.08 | 16.15 | 18.81 | 19.43 | 14.04 | 17.81 |
| SLC25A23 | 21.86 | 24.2  | 22.1  | 22.03 | 18.6  | 19.43 | 15.73 | 18.87 |
| WDR61    | 18.79 | 16.96 | 19.1  | 18.48 | 20.23 | 19.43 | 21.78 | 20.07 |
| ODF2     | 20.16 | 18.46 | 20.25 | 21.64 | 20.19 | 19.43 | 21.03 | 21.06 |
| RXRB     | 19.4  | 20.42 | 19    | 18.47 | 19.39 | 19.44 | 18.39 | 18.74 |
| PPP1R2   | 16.94 | 18.71 | 18.27 | 21.2  | 18.8  | 19.44 | 17.15 | 19.3  |
| LUZP1    | 19.12 | 18.91 | 19.79 | 19.94 | 19.99 | 19.44 | 20.61 | 21.65 |
| MAN1A2   | 17.37 | 19.35 | 20.02 | 24.12 | 21.76 | 19.44 | 27.3  | 28.14 |
| FAM171A2 | 25.61 | 26    | 24.02 | 21.19 | 17.53 | 19.45 | 12.68 | 15.64 |
| ASH2L    | 21.33 | 20.5  | 21.03 | 20.3  | 20.68 | 19.45 | 20.9  | 19.53 |
| LRRFIP1  | 16.73 | 15.32 | 19.7  | 23.41 | 20.43 | 19.45 | 30.45 | 28.12 |
| UHMK1    | 16.57 | 13.93 | 19.71 | 22.29 | 19.57 | 19.46 | 30.37 | 26.89 |
| TTC37    | 16.42 | 14.64 | 19.24 | 22.05 | 19.38 | 19.47 | 33.18 | 28.45 |
| PDS5A    | 15.93 | 14.97 | 18.52 | 21.44 | 18.91 | 19.48 | 28.17 | 23.41 |
| CLSTN3   | 23.81 | 24.66 | 23.6  | 22.14 | 18.7  | 19.49 | 17.48 | 19.51 |
| MTOR     | 17.7  | 17.31 | 16.82 | 17.69 | 19.16 | 19.49 | 19.69 | 20.46 |
| PITPNB   | 15.67 | 15.83 | 17.35 | 18.6  | 20.28 | 19.49 | 24.69 | 20.48 |
| MRFAP1L1 | 19.34 | 19.07 | 21.88 | 23.07 | 19.73 | 19.5  | 23.45 | 22.17 |
| TNK2     | 19.41 | 19.9  | 19.02 | 19.35 | 18.51 | 19.51 | 16.6  | 18.01 |
| ZCCHC17  | 19.69 | 20.13 | 18.18 | 18.88 | 17.96 | 19.52 | 19.17 | 19.95 |
| ZKSCAN1  | 18.78 | 16.57 | 21.7  | 25.06 | 18.68 | 19.52 | 26.6  | 24.92 |
| C19orf52 | 17.95 | 17.27 | 18.55 | 15.64 | 20.36 | 19.54 | 14.43 | 16.53 |
| CYTH1    | 19.01 | 19.61 | 19.47 | 20.45 | 19.37 | 19.54 | 19.38 | 19.17 |
| SLC12A4  | 15.76 | 16.63 | 15.86 | 16.69 | 19.08 | 19.54 | 18.04 | 19.3  |
| LARP4B   | 18.89 | 18.72 | 18.82 | 20.86 | 19.34 | 19.54 | 20.9  | 21.43 |
| ERCC3    | 18.64 | 18    | 17.64 | 16.99 | 19.59 | 19.55 | 19.65 | 17.85 |
| MSANTD3  | 17.01 | 17.59 | 18.17 | 19.2  | 20.82 | 19.55 | 21.02 | 19.74 |
| ANAPC7   | 16.27 | 16.71 | 17.24 | 18.69 | 20.07 | 19.55 | 20.92 | 21.05 |

|              |       |       |       |       |       |       |       |       |
|--------------|-------|-------|-------|-------|-------|-------|-------|-------|
| CRTC2        | 20.82 | 20.93 | 20.19 | 19.59 | 20.54 | 19.55 | 18.98 | 21.25 |
| DCTN4        | 18.18 | 17.5  | 18.23 | 19.62 | 22.1  | 19.55 | 24.56 | 22.37 |
| NEK6         | 19.78 | 20.41 | 19.82 | 19.45 | 19.61 | 19.56 | 17.86 | 18.3  |
| PRSS23       | 17.01 | 18.54 | 16.94 | 19.26 | 21.76 | 19.56 | 22.34 | 18.4  |
| PTPN23       | 20.9  | 21.08 | 19.72 | 18.73 | 18.39 | 19.56 | 15.62 | 18.72 |
| MED19        | 18.77 | 20.35 | 17.06 | 16.84 | 19.28 | 19.56 | 16.71 | 18.9  |
| KDM3B        | 20.2  | 20.24 | 20.88 | 20.53 | 19.11 | 19.56 | 20.14 | 20.99 |
| MACF1        | 17    | 16.86 | 18.54 | 19.86 | 19.91 | 19.56 | 24.24 | 22.77 |
| PARD3        | 20.02 | 20.48 | 21.1  | 20.31 | 20.43 | 19.57 | 21.17 | 22.11 |
| SAR1A        | 19.01 | 17.03 | 20.04 | 21.21 | 19.81 | 19.59 | 23.71 | 22.19 |
| RACGAP1      | 17.15 | 16.63 | 17.05 | 14.13 | 18.94 | 19.6  | 19.63 | 18.16 |
| GGA2         | 21.57 | 21.5  | 21.94 | 22.54 | 20.31 | 19.6  | 21.02 | 20.93 |
| SH3PXD2A     | 18.49 | 17.96 | 18.6  | 19.59 | 18.83 | 19.6  | 20.27 | 21.14 |
| C11orf49     | 21.42 | 22.33 | 21.94 | 19.75 | 20.1  | 19.61 | 17.45 | 19.46 |
| CTPS1        | 17.54 | 17.48 | 18.33 | 18.46 | 20.3  | 19.62 | 19.96 | 18.64 |
| UXS1         | 18.9  | 18.39 | 18.44 | 18.9  | 22.76 | 19.62 | 21.35 | 21.51 |
| POLR2B       | 15.87 | 15.09 | 17.95 | 19.29 | 21.34 | 19.62 | 26.64 | 23.09 |
| ACBD4        | 18.49 | 18.73 | 18.18 | 18.15 | 19.41 | 19.65 | 18.35 | 18.68 |
| PPL          | 20.04 | 20.76 | 19.99 | 19.85 | 19.06 | 19.65 | 17.43 | 18.94 |
| CROT         | 16.75 | 15.03 | 18.67 | 20.67 | 20.86 | 19.65 | 29.81 | 24.29 |
| NUP210       | 21.59 | 21.18 | 21.14 | 21.03 | 20.35 | 19.66 | 19.63 | 20.53 |
| GCDH         | 16.36 | 17.51 | 16.1  | 14.73 | 20.71 | 19.67 | 16.43 | 16.21 |
| PDRG1        | 19.69 | 21.42 | 20.46 | 17.98 | 21.45 | 19.67 | 17.68 | 20.97 |
| TBC1D5       | 17.56 | 17.42 | 19.6  | 21.25 | 20.66 | 19.67 | 25.44 | 22.42 |
| ZFR          | 21.23 | 18.68 | 23    | 25.49 | 22.29 | 19.68 | 29.42 | 25.94 |
| DHRS1        | 22.04 | 21.05 | 19.1  | 19.65 | 21.33 | 19.72 | 16.89 | 18.26 |
| VAPB         | 18.66 | 17.91 | 19.56 | 19.25 | 20.37 | 19.72 | 21.49 | 20.88 |
| LGR4         | 17.77 | 17.19 | 19.41 | 21.27 | 19.31 | 19.73 | 27.18 | 25.09 |
| RABGGTA      | 17.64 | 18.57 | 17.36 | 15.74 | 21.3  | 19.74 | 16.43 | 17.18 |
| SMIM19       | 20.97 | 20.95 | 22.33 | 19.32 | 19.44 | 19.74 | 19.12 | 17.83 |
| TSN          | 17.74 | 16.59 | 18.94 | 18.52 | 20.24 | 19.74 | 24.15 | 22.8  |
| CCNG1        | 17.43 | 17.55 | 18.09 | 18.6  | 19.45 | 19.74 | 27.05 | 24.18 |
| ITGAV        | 18.18 | 17.32 | 20.43 | 24.51 | 20.18 | 19.74 | 33.68 | 29.98 |
| COG1         | 19.41 | 20.92 | 18.88 | 19.21 | 18.25 | 19.75 | 17.77 | 17.62 |
| SORD         | 17.1  | 16.84 | 15.94 | 16.96 | 20.15 | 19.75 | 18.14 | 19.26 |
| IRF9         | 32.11 | 33.28 | 32.33 | 32.17 | 20.06 | 19.75 | 18.63 | 19.79 |
| WIPF2        | 21.37 | 21.39 | 21.06 | 21.35 | 18.83 | 19.75 | 19.28 | 19.85 |
| TMEM238      | 24.58 | 20.33 | 19.33 | 15.52 | 16.24 | 19.76 | 9.62  | 10.56 |
| TAZ          | 19.59 | 18.58 | 18.83 | 20.86 | 19.47 | 19.76 | 18.49 | 20.3  |
| LRIG1        | 23.01 | 21.58 | 21.63 | 22.31 | 18.51 | 19.76 | 19.29 | 20.3  |
| MAX          | 17.32 | 20.05 | 19.67 | 18.55 | 20.04 | 19.76 | 20.48 | 21.36 |
| BID          | 18.64 | 18.54 | 18.44 | 18.71 | 17.96 | 19.77 | 13.66 | 15.52 |
| MED8         | 20.51 | 21.63 | 21.29 | 20.97 | 22.13 | 19.77 | 22.71 | 22.47 |
| SRP72        | 17.73 | 16.56 | 18.92 | 21.23 | 21.8  | 19.77 | 26.67 | 22.49 |
| PLXND1       | 20.02 | 21.05 | 19.26 | 19.49 | 19.27 | 19.78 | 15.89 | 18.14 |
| ZBTB7A       | 20.52 | 20.73 | 20.66 | 19.93 | 19.94 | 19.78 | 16.92 | 18.18 |
| PHF23        | 19.1  | 20.83 | 18.34 | 17.2  | 18.01 | 19.78 | 16.34 | 18.97 |
| LOC102724159 | 16.75 | 16.31 | 17.01 | 15.01 | 18.38 | 19.79 | 16.37 | 16.98 |
| SERTAD3      | 23.54 | 25.14 | 23.24 | 21.69 | 19.2  | 19.79 | 19.56 | 20.39 |
| BCL2L12      | 21.98 | 19.52 | 20.22 | 18.93 | 21.37 | 19.8  | 17.51 | 17.16 |
| FBN1         | 18.53 | 19.77 | 19.4  | 20.6  | 19.27 | 19.8  | 21.96 | 21.49 |
| GLT8D1       | 18.67 | 18.64 | 21.72 | 21.43 | 21.16 | 19.8  | 26.43 | 25.2  |
| CHAF1A       | 23.37 | 21.12 | 21.41 | 21.31 | 19.69 | 19.81 | 18.51 | 17.22 |
| CCNH         | 16.17 | 17.08 | 15.95 | 18.75 | 19.02 | 19.81 | 25.28 | 21.02 |
| EIF2B4       | 19.53 | 19.88 | 19.32 | 19.37 | 19.12 | 19.82 | 18.05 | 18.17 |
| SRF          | 19.72 | 19.21 | 19.03 | 19.18 | 19.28 | 19.83 | 16.09 | 18.01 |
| PREP         | 20.6  | 20.6  | 19.17 | 19.28 | 19.42 | 19.83 | 18.9  | 18.85 |
| ACOT9        | 19.14 | 16.78 | 18.65 | 16.87 | 20.47 | 19.83 | 21.54 | 21.09 |
| ERMP1        | 19.01 | 19.37 | 20.99 | 22.41 | 19.89 | 19.83 | 23.68 | 22.9  |
| LLGL2        | 18.97 | 19.7  | 19.67 | 18.17 | 19.03 | 19.84 | 16.37 | 17.1  |
| TMEM109      | 23.75 | 22.72 | 22.4  | 19.47 | 21.78 | 19.84 | 17.04 | 18.98 |
| TOLLIP       | 17.54 | 18.17 | 17.77 | 17.34 | 17.85 | 19.85 | 15.48 | 15.49 |
| KCTD1        | 22.39 | 20.57 | 20.46 | 20.16 | 18.14 | 19.85 | 17.74 | 19.37 |
| MRPL15       | 17.23 | 16.49 | 19.44 | 17.57 | 18.88 | 19.85 | 20.15 | 19.91 |
| CHRM3        | 22    | 21.22 | 21.69 | 23.25 | 19.99 | 19.85 | 23.22 | 21.65 |
| BCAP29       | 18.45 | 18.74 | 19.68 | 21.58 | 19.66 | 19.85 | 30.52 | 24.34 |
| NOL6         | 18.22 | 17.98 | 17.65 | 16.6  | 19.86 | 19.86 | 17.19 | 18.86 |
| PRPF3        | 18.57 | 16.63 | 17.93 | 20.05 | 18.84 | 19.86 | 22.85 | 21.89 |
| THRA         | 21.1  | 22.01 | 20.22 | 19.53 | 17.78 | 19.87 | 16.91 | 18.42 |
| VGLL4        | 21.28 | 20.87 | 20.25 | 22.01 | 20.81 | 19.87 | 19.79 | 19.7  |
| NUSAP1       | 17.43 | 16.16 | 18.89 | 19.63 | 20.75 | 19.87 | 29.52 | 24.1  |
| CEP131       | 20.24 | 19.64 | 19.44 | 18.04 | 18.92 | 19.89 | 15.02 | 17.07 |
| USP36        | 17.91 | 16.59 | 17.57 | 18.28 | 19.62 | 19.9  | 20.36 | 19.59 |
| NUAK1        | 30.72 | 28.94 | 29.65 | 29.28 | 20.68 | 19.9  | 21.13 | 20.01 |
| TCEA2        | 21.7  | 25.35 | 22.86 | 20.01 | 21.45 | 19.91 | 16.98 | 17.43 |
| LIPG         | 14.81 | 16.84 | 15.15 | 17.36 | 17.67 | 19.91 | 18.89 | 19.93 |
| TOX4         | 20.44 | 20.49 | 19.84 | 20.27 | 20.96 | 19.91 | 19.17 | 19.96 |
| CCDC53       | 21.83 | 19.87 | 21.85 | 21.22 | 22.7  | 19.91 | 22.88 | 23.29 |
| SPAG7        | 17.86 | 21.25 | 18.75 | 17.85 | 21.98 | 19.93 | 16.53 | 20.6  |
| STAT2        | 26.08 | 26.73 | 25.32 | 26.41 | 19.63 | 19.93 | 22.03 | 21.68 |
| OSBPL10      | 20.1  | 18.93 | 20.1  | 19.68 | 18.72 | 19.94 | 19.26 | 18.29 |
| TCTEX1D2     | 24.16 | 21.04 | 21.7  | 23.14 | 19.16 | 19.94 | 21    | 18.65 |
| METTL2B      | 17.69 | 17.19 | 16.28 | 18.02 | 19.25 | 19.95 | 21.38 | 19.09 |
| MT1X         | 45.7  | 42.24 | 47.91 | 37.82 | 21.7  | 19.97 | 20.15 | 20.27 |
| RAB24        | 18.21 | 17.88 | 17.98 | 17.47 | 20.92 | 19.97 | 18.37 | 21.31 |
| ABTB1        | 19.36 | 20.42 | 18.9  | 17.73 | 19.7  | 19.98 | 15.8  | 18.2  |



|              |       |       |       |       |       |       |       |       |
|--------------|-------|-------|-------|-------|-------|-------|-------|-------|
| CCDC50       | 18.09 | 16.61 | 17.99 | 19.88 | 19.64 | 20.02 | 21.1  | 20.19 |
| RGP1         | 18.93 | 18.59 | 17.83 | 17.37 | 17.79 | 20.03 | 17.32 | 19.16 |
| TRIP10       | 21.43 | 20.5  | 20.41 | 18.92 | 20.7  | 20.03 | 18.08 | 19.56 |
| SPIN1        | 19    | 17.88 | 20.64 | 22.32 | 21.42 | 20.03 | 27.06 | 23.42 |
| FAM102A      | 20.68 | 20.92 | 20.2  | 19.88 | 19.08 | 20.04 | 15.52 | 17.19 |
| TIGD5        | 19.48 | 20.56 | 17.3  | 16.82 | 17.6  | 20.05 | 12.42 | 14.17 |
| LMCD1        | 22.77 | 20.89 | 21.35 | 21.41 | 19.93 | 20.05 | 17.51 | 16.81 |
| TCTN1        | 18.78 | 18.43 | 21.41 | 21.88 | 18.93 | 20.05 | 26.06 | 24.97 |
| AAR2         | 21.82 | 20.33 | 20.92 | 20.43 | 22.2  | 20.07 | 18.46 | 20.17 |
| CMAS         | 19.09 | 17.43 | 19.87 | 19.75 | 20.88 | 20.07 | 26.02 | 22.4  |
| ENDOG        | 20.59 | 20.11 | 18.99 | 17.39 | 17.67 | 20.08 | 13.27 | 15.3  |
| NCKIPSD      | 22.25 | 22.01 | 23.27 | 23.44 | 19.64 | 20.08 | 18.84 | 19.84 |
| GOSR1        | 18.15 | 18.59 | 19.42 | 20.01 | 18.76 | 20.08 | 21.33 | 20.4  |
| PTRH1        | 17.91 | 20.15 | 18.43 | 16.77 | 19.09 | 20.09 | 13.6  | 17.05 |
| HAT1         | 18.91 | 20.46 | 19.6  | 20.05 | 19.11 | 20.1  | 25.67 | 21.39 |
| RNF166       | 20.79 | 17.8  | 20.16 | 16.82 | 18.63 | 20.11 | 15.83 | 16.43 |
| HPS1         | 21.2  | 20.16 | 20.1  | 20.47 | 20.35 | 20.12 | 17.08 | 17.66 |
| POLR3H       | 19.21 | 18.89 | 19.57 | 18.84 | 21.59 | 20.12 | 18.54 | 18.73 |
| ZDHHC7       | 17.47 | 19.66 | 18.57 | 19.26 | 21.19 | 20.14 | 20.89 | 19.8  |
| PIP5K1A      | 21    | 20.99 | 20.91 | 22.48 | 21.86 | 20.14 | 22.6  | 22.28 |
| SELK         | 18.85 | 21.83 | 20.44 | 21.07 | 22.38 | 20.14 | 23.45 | 22.62 |
| TMEM261      | 20.1  | 18.55 | 19.14 | 17.62 | 19.51 | 20.15 | 17.75 | 18.7  |
| ATG3         | 16.51 | 16.75 | 18.36 | 17.84 | 18.77 | 20.15 | 22.23 | 20.29 |
| SHMT1        | 22.04 | 21.92 | 21.04 | 20.82 | 20.34 | 20.17 | 17.85 | 18.31 |
| STK10        | 19.06 | 19.62 | 18.67 | 18.74 | 19.88 | 20.17 | 18.81 | 19.93 |
| QDPR         | 19.14 | 20.78 | 20.29 | 20.08 | 17.6  | 20.19 | 16.7  | 17.18 |
| GTF3C2       | 20.34 | 19.51 | 19.21 | 18.7  | 19.47 | 20.19 | 19.37 | 19.66 |
| AIFM1        | 18.73 | 19.64 | 19.49 | 18.62 | 21.14 | 20.19 | 20.55 | 22.08 |
| PTGS2        | 20.59 | 17.31 | 21.45 | 24.55 | 25.97 | 20.2  | 36.83 | 26.94 |
| PDCD10       | 20.13 | 21.17 | 21.58 | 21.26 | 23.43 | 20.21 | 29.01 | 27.59 |
| HSD17B1      | 20.87 | 19.26 | 21.12 | 21.76 | 19.97 | 20.25 | 16.57 | 20.55 |
| LOC107987020 | 20.55 | 18.54 | 18.33 | 21.41 | 18.73 | 20.26 | 21.54 | 20.47 |
| CDA5         | 21.17 | 19.1  | 18.89 | 18.63 | 20.59 | 20.27 | 16.99 | 16.9  |
| FAHD2A       | 17.19 | 17.83 | 18.75 | 15.42 | 17.95 | 20.27 | 20.48 | 19.53 |
| VAC14        | 18.96 | 17.73 | 17.64 | 17.89 | 18.41 | 20.28 | 15.97 | 16.98 |
| INTS10       | 17.06 | 16.94 | 18.15 | 18.6  | 20.96 | 20.28 | 23.14 | 21.19 |
| COMMD5       | 18.66 | 18.43 | 17.65 | 17.51 | 19.98 | 20.29 | 16.54 | 17.23 |
| VEZF1        | 19.29 | 18.48 | 20.23 | 22.85 | 20.48 | 20.29 | 25.43 | 24.92 |
| SLC1A3       | 19.19 | 18.17 | 19.69 | 21.2  | 21.56 | 20.31 | 25.89 | 23.82 |
| KIAA1671     | 19.18 | 18.81 | 19.94 | 21.02 | 20.23 | 20.32 | 22.81 | 22.94 |
| SNRPD1       | 21.77 | 20.86 | 21.61 | 22.7  | 21.73 | 20.33 | 26.46 | 24    |
| IQCK         | 24.47 | 24.72 | 24.87 | 25.08 | 20.72 | 20.33 | 23.28 | 24.08 |
| CRTC1        | 20.35 | 21.33 | 19.5  | 17.45 | 17.55 | 20.34 | 15.07 | 16.2  |
| METTL13      | 18.38 | 19.62 | 19.18 | 18.52 | 20.58 | 20.34 | 19.93 | 19.01 |
| MRPS17       | 19.02 | 19.89 | 21.09 | 21.29 | 21.26 | 20.35 | 22.66 | 23.5  |
| TMED7        | 20.14 | 19.11 | 19.74 | 22.01 | 19.19 | 20.36 | 30.2  | 25.34 |
| TCF7L2       | 22.35 | 22.75 | 23.94 | 22.81 | 19.92 | 20.37 | 20.13 | 21.85 |
| SLC30A5      | 19.88 | 18.87 | 21.34 | 22.57 | 21.11 | 20.37 | 27.17 | 23.1  |
| EFCAB14      | 17.73 | 17.24 | 18.48 | 20.58 | 20.46 | 20.37 | 23.19 | 24.22 |
| TUSC2        | 18.69 | 18.28 | 17.24 | 16.7  | 18.47 | 20.38 | 16    | 16.78 |
| ING4         | 19.78 | 20.94 | 20.14 | 19.37 | 20.37 | 20.38 | 20.43 | 19.19 |
| PSRC1        | 18.68 | 20.6  | 18.51 | 17.2  | 20.8  | 20.38 | 17.26 | 19.63 |
| DIMT1        | 18.35 | 19.12 | 20.44 | 21.14 | 22.93 | 20.38 | 27.4  | 23.97 |
| GBF1         | 21.59 | 22.32 | 21.8  | 20.97 | 19.13 | 20.4  | 18.1  | 19.93 |
| OCEL1        | 21.38 | 24.83 | 21.54 | 19.72 | 20.48 | 20.41 | 16.38 | 17.63 |
| TM2D2        | 19.99 | 20.98 | 20.6  | 21.49 | 21.06 | 20.42 | 23.46 | 20.66 |
| TPRKB        | 15.99 | 18.95 | 20.53 | 20.81 | 19.92 | 20.42 | 28.85 | 24.15 |
| FAAP100      | 21    | 21.11 | 19.63 | 19.93 | 19.67 | 20.43 | 16.7  | 18.12 |
| RAI14        | 16.62 | 14.91 | 19.22 | 22.2  | 21.91 | 20.43 | 33.09 | 27.79 |
| ANKLE2       | 18.64 | 19.25 | 20.66 | 19.41 | 20.73 | 20.44 | 21.92 | 19.75 |
| MPRIP        | 18.52 | 18.51 | 18.93 | 19.14 | 19.82 | 20.44 | 21.34 | 20.67 |
| ATXN7L3B     | 19.78 | 20.59 | 19.94 | 20.35 | 20.46 | 20.44 | 22.14 | 21.07 |
| FAF2         | 19.16 | 19.02 | 20.69 | 20.55 | 22.39 | 20.44 | 24.26 | 22.76 |
| MRPL16       | 19.27 | 16.35 | 17.8  | 17    | 19.02 | 20.45 | 18.95 | 19.4  |
| PSMG4        | 21.28 | 20.58 | 18.86 | 19.56 | 21.98 | 20.46 | 17.12 | 17.73 |
| DIABLO       | 22.86 | 21.02 | 21.88 | 20.78 | 21.33 | 20.46 | 21.81 | 20.63 |
| ADK          | 18.68 | 17.94 | 20    | 22.1  | 21.6  | 20.47 | 27.66 | 24.8  |
| OSER1        | 19.05 | 19.93 | 19.29 | 20.24 | 21.06 | 20.49 | 22.22 | 23.12 |
| GABARAPL1    | 16.9  | 17.85 | 17.9  | 18.14 | 21.11 | 20.5  | 23.47 | 22.61 |
| POLR3E       | 17.77 | 17.99 | 16.25 | 16.87 | 19.66 | 20.51 | 20.1  | 19.86 |
| PPP1R13L     | 20.84 | 20.95 | 21.49 | 19.24 | 20.26 | 20.54 | 16.76 | 17.49 |
| HS3ST1       | 18.87 | 18.66 | 17.94 | 17.44 | 18.02 | 20.54 | 17.42 | 19.23 |
| GPAT4        | 18.52 | 18.86 | 19    | 19.41 | 20.22 | 20.54 | 22.49 | 21.11 |
| PRR12        | 21.28 | 21.22 | 20.27 | 21.01 | 18.37 | 20.57 | 14.67 | 16.94 |
| IMP4         | 17.99 | 17.65 | 17.94 | 16.7  | 22.22 | 20.57 | 18.62 | 18.68 |
| CHD8         | 21.21 | 21.29 | 21.97 | 21.87 | 21.42 | 20.57 | 22.42 | 22.86 |
| CYCS         | 17.41 | 18.1  | 17.82 | 18.97 | 21.83 | 20.57 | 27.16 | 24.95 |
| CYR61        | 15.04 | 14.51 | 15.23 | 15.08 | 22.05 | 20.59 | 20.03 | 18.86 |
| GLRX2        | 15.38 | 15.72 | 16.23 | 17.66 | 19.7  | 20.6  | 23.03 | 21.14 |
| DHRS11       | 20.41 | 19.83 | 19.33 | 21.06 | 20.67 | 20.61 | 18.91 | 18.5  |
| OSBP         | 19.17 | 19.78 | 20.58 | 19.99 | 20.36 | 20.61 | 21.96 | 21.53 |
| PIP4K2B      | 20.49 | 20.27 | 20.92 | 19.92 | 21.94 | 20.62 | 20.98 | 22.37 |
| CARHSP1      | 22.63 | 23.22 | 22.72 | 23.02 | 20.68 | 20.63 | 18.58 | 18.73 |
| CCDC127      | 21.41 | 21.75 | 20.65 | 21.76 | 21.9  | 20.64 | 20.14 | 21.47 |
| ZNF3         | 20.41 | 21.94 | 20.66 | 22.26 | 19.12 | 20.64 | 22.66 | 22.06 |
| GPBP1L1      | 18.28 | 19.03 | 20.04 | 21.82 | 22.97 | 20.65 | 26.32 | 24.18 |

|          |       |       |       |       |       |       |       |       |
|----------|-------|-------|-------|-------|-------|-------|-------|-------|
| TNNT1    | 25.1  | 28.93 | 26.12 | 24.93 | 20.69 | 20.67 | 16.29 | 22.67 |
| PRPS2    | 19.22 | 18.03 | 20.99 | 22.37 | 21.21 | 20.68 | 24.32 | 20.77 |
| EIF5B    | 20.29 | 18.07 | 22.8  | 26.89 | 24.27 | 20.68 | 34.73 | 32.88 |
| B9D1     | 21.79 | 21.51 | 23.05 | 20.82 | 18.97 | 20.7  | 16.77 | 16.05 |
| TARBP2   | 20.44 | 22.34 | 21.65 | 18    | 20.32 | 20.72 | 15.76 | 17.53 |
| ZMYND8   | 18.77 | 17.99 | 20    | 21.65 | 19.68 | 20.72 | 21.99 | 22    |
| GPR107   | 20.2  | 21.17 | 21.5  | 22.05 | 21.62 | 20.73 | 23.21 | 22.02 |
| PDCL3    | 18.54 | 16.8  | 20.23 | 18.83 | 21.11 | 20.73 | 25.55 | 24.52 |
| DNASE1L1 | 18.97 | 17.97 | 16.81 | 17.57 | 21.31 | 20.74 | 17.83 | 18.66 |
| ZWINT    | 20.12 | 18.66 | 21.53 | 21.44 | 20.12 | 20.74 | 21.36 | 18.89 |
| SNCA     | 18.64 | 17.3  | 19.42 | 21.44 | 23.77 | 20.74 | 26.15 | 24.88 |
| SCNM1    | 19.54 | 21.58 | 20.93 | 19.64 | 19.93 | 20.75 | 16.21 | 18.91 |
| POLR2A   | 25.29 | 26.12 | 25.03 | 25.12 | 20.38 | 20.77 | 18.81 | 20.26 |
| ZNFX1    | 24.85 | 24.51 | 24.29 | 24.84 | 20.83 | 20.77 | 21.68 | 20.28 |
| WAC      | 19.14 | 18.16 | 21.31 | 24.51 | 20.85 | 20.77 | 29.46 | 27.32 |
| FUCA2    | 17.66 | 18.16 | 17.43 | 19.02 | 20.43 | 20.78 | 19.52 | 17.97 |
| NMRAL1   | 19.5  | 21.18 | 17.88 | 19    | 19.14 | 20.78 | 15.65 | 19.32 |
| PREB     | 20.78 | 19.95 | 20.2  | 19.09 | 21.26 | 20.78 | 18.16 | 19.6  |
| NOL11    | 18.08 | 18.09 | 20.07 | 21.6  | 21.38 | 20.79 | 28.66 | 25.12 |
| NQO1     | 21.67 | 22.65 | 21.32 | 20.66 | 20.87 | 20.8  | 19.03 | 19.57 |
| C9orf3   | 20.48 | 23.38 | 22.06 | 22.83 | 22.72 | 20.8  | 23.29 | 22.31 |
| TSPAN6   | 20.55 | 20.51 | 19.36 | 20.88 | 21.59 | 20.8  | 23.88 | 24.59 |
| RAP1A    | 22.05 | 19.32 | 22.79 | 24.79 | 22.23 | 20.8  | 31.31 | 25.55 |
| NUDCD3   | 20.83 | 20.91 | 19.78 | 19.58 | 20.65 | 20.81 | 18.47 | 18.57 |
| UQCC2    | 19.94 | 22.22 | 18.43 | 18.72 | 21.66 | 20.81 | 18.3  | 19.13 |
| ALG8     | 20.37 | 19.54 | 21.97 | 21.31 | 21.25 | 20.81 | 24.24 | 21.81 |
| RBM22    | 23.27 | 22.05 | 23.98 | 22.46 | 23    | 20.82 | 23.19 | 19.99 |
| SRD5A1   | 17.93 | 18.38 | 18.06 | 17.81 | 21.78 | 20.82 | 23.37 | 20.63 |
| RNF213   | 22.87 | 21.7  | 22.78 | 24.78 | 20.12 | 20.83 | 23.51 | 22.77 |
| TLE1     | 23    | 20.9  | 22.26 | 21.61 | 20.49 | 20.84 | 18.97 | 18.85 |
| PCDHB2   | 24.12 | 22.65 | 24.28 | 25.77 | 19.83 | 20.84 | 18.93 | 19.09 |
| RAB2A    | 21.88 | 22.02 | 23.88 | 24.22 | 24.12 | 20.84 | 27.82 | 24.96 |
| ZBTB48   | 22.23 | 21.9  | 21.8  | 20.54 | 19.32 | 20.85 | 17.33 | 19.33 |
| ZMPSTE24 | 15.85 | 15.55 | 18.26 | 19.69 | 20.45 | 20.86 | 28.88 | 25.57 |
| GPKOW    | 21.82 | 21.81 | 20.24 | 20.13 | 19.8  | 20.87 | 18.67 | 18.8  |
| ELP6     | 18.98 | 19.06 | 18.71 | 17.48 | 21.79 | 20.87 | 18.04 | 19.46 |
| MPND     | 22.92 | 23.35 | 22.09 | 19.45 | 19.91 | 20.88 | 17.82 | 17.74 |
| GYG1     | 19.43 | 18.67 | 20.46 | 18.18 | 20.93 | 20.89 | 22.34 | 21.72 |
| FSD1     | 19.66 | 19.64 | 19.02 | 17.88 | 20.49 | 20.9  | 16.2  | 17.39 |
| TMEM55B  | 17.46 | 19.45 | 17.91 | 17.31 | 22.07 | 20.9  | 17.03 | 19.44 |
| RPRD1A   | 18.09 | 17.1  | 20.62 | 21.56 | 21.14 | 20.9  | 26.55 | 25.65 |
| NUP188   | 19.23 | 19.27 | 19.3  | 18.78 | 19.5  | 20.91 | 19.24 | 18.06 |
| ZDHHC9   | 21.46 | 21.8  | 20.98 | 19.77 | 21.78 | 20.91 | 20.78 | 21.38 |
| FOXP4    | 25.23 | 25.35 | 23.39 | 22.51 | 20.2  | 20.92 | 15.97 | 19.18 |
| ELF4     | 21.71 | 23.58 | 21.72 | 23.34 | 21.07 | 20.92 | 19.12 | 20.85 |
| NUP205   | 19.09 | 18.62 | 20.11 | 21.34 | 22.27 | 20.92 | 24.79 | 22.13 |
| LZTR1    | 20.97 | 21.48 | 19.34 | 19.21 | 21.36 | 20.94 | 18.67 | 19.98 |
| GTF2IRD1 | 20.56 | 22    | 22.41 | 21.9  | 19.16 | 20.94 | 18.99 | 20.67 |
| PDCD11   | 18.55 | 18.84 | 18.64 | 18.36 | 20.86 | 20.94 | 20.43 | 20.88 |
| PHKB     | 19.48 | 17.71 | 20.57 | 20.95 | 22.63 | 20.94 | 29.04 | 25.21 |
| GNAI3    | 19.62 | 18.66 | 21.97 | 23.68 | 22.89 | 20.94 | 29.23 | 26.12 |
| ZFYVE21  | 21.35 | 20.85 | 22.04 | 21.21 | 20.34 | 20.96 | 19.91 | 20.58 |
| USF1     | 21.75 | 21.76 | 21.65 | 19.76 | 22.67 | 20.96 | 19.67 | 20.78 |
| RCN1     | 18.34 | 17.37 | 19.48 | 20.23 | 21.86 | 20.96 | 27.17 | 25.67 |
| EMC8     | 18.19 | 18.62 | 16.72 | 15.7  | 18.89 | 20.97 | 16.51 | 15.75 |
| FAM43A   | 18.67 | 17.86 | 18    | 16.67 | 18.74 | 20.97 | 14.21 | 17.75 |
| NIFK     | 17.52 | 16.19 | 18.57 | 20.15 | 21.53 | 20.97 | 27.34 | 23.89 |
| USP7     | 20.05 | 19.02 | 20.99 | 21.46 | 21.27 | 20.97 | 24.38 | 24.89 |
| FAM171A1 | 19.74 | 19.83 | 20.06 | 20.37 | 20.05 | 20.98 | 18.55 | 20.37 |
| SLC25A29 | 19.58 | 19.08 | 18.41 | 19.25 | 19.48 | 20.99 | 20.95 | 20.57 |
| FERMT1   | 19.73 | 18.25 | 19.17 | 19.47 | 22.35 | 21    | 23.37 | 22.35 |
| CDK5RAP1 | 17.89 | 17.13 | 17.85 | 18.09 | 19.24 | 21.02 | 20.11 | 19.96 |
| ATP9A    | 22.19 | 23.67 | 22.79 | 23.96 | 21.42 | 21.02 | 21.45 | 22.61 |
| PLEKHF1  | 20.88 | 19.71 | 19.2  | 17.6  | 18.98 | 21.03 | 14.46 | 16.5  |
| PLPP5    | 22.01 | 23.05 | 22.61 | 20.78 | 18.84 | 21.03 | 23.11 | 21.69 |
| POP5     | 20.4  | 22.31 | 19.2  | 19.75 | 23.72 | 21.03 | 24.61 | 22.19 |
| KLF6     | 17.39 | 15.98 | 17.46 | 18.55 | 21.71 | 21.03 | 23.65 | 22.94 |
| DR1      | 20.08 | 19.09 | 21.12 | 21.76 | 19.41 | 21.03 | 23.07 | 23.23 |
| TMEM127  | 21.14 | 22.17 | 20.49 | 20.39 | 21.1  | 21.04 | 19.5  | 20.61 |
| TCF7     | 19.77 | 21.57 | 21.71 | 20.66 | 21.23 | 21.05 | 19.76 | 21.51 |
| SFT2D1   | 17.39 | 20.64 | 20.05 | 21.04 | 20.52 | 21.06 | 23.81 | 21.82 |
| TSR2     | 21.94 | 23.61 | 22.44 | 20.98 | 21.4  | 21.07 | 19.97 | 23.03 |
| SMYD5    | 19.71 | 21.69 | 20.08 | 18.71 | 21.38 | 21.08 | 19.3  | 20.88 |
| DDX18    | 19.83 | 16.84 | 23    | 25.51 | 22.29 | 21.08 | 30.98 | 27.29 |
| KIAA0368 | 17.97 | 17.17 | 18.8  | 20.29 | 20.28 | 21.09 | 26.08 | 22.78 |
| BBS5     | 20.89 | 19.77 | 21.76 | 23.26 | 21.94 | 21.09 | 21.39 | 23.04 |
| AKIRIN2  | 19.84 | 19.33 | 20.19 | 20.78 | 20.96 | 21.1  | 18.7  | 18.85 |
| SDHAF2   | 19.86 | 20.37 | 19.44 | 19.86 | 20.42 | 21.11 | 20.31 | 22.03 |
| BRIX1    | 21.36 | 18.65 | 21.05 | 22.51 | 23.67 | 21.12 | 28.34 | 24.9  |
| CIAO1    | 18.72 | 17.54 | 18.87 | 19.01 | 20.65 | 21.13 | 20.18 | 20.77 |
| TUBB2A   | 23.11 | 21.66 | 22.78 | 19    | 19.89 | 21.14 | 16.84 | 18.88 |
| CXorf40B | 18.81 | 18.55 | 19.22 | 17.32 | 21.9  | 21.16 | 20.13 | 20.48 |
| CHMP7    | 21.58 | 22.1  | 22.65 | 20.44 | 22.29 | 21.16 | 20.62 | 21.01 |
| MRPL45   | 18.39 | 18.7  | 20.1  | 18.88 | 22.31 | 21.16 | 24.56 | 21.77 |
| KDSR     | 17.38 | 15.96 | 18.8  | 20.34 | 21.46 | 21.17 | 25.63 | 22.38 |

|              |       |       |       |       |       |       |       |       |
|--------------|-------|-------|-------|-------|-------|-------|-------|-------|
| TMEM97       | 19.75 | 20.18 | 20.2  | 20.2  | 21.75 | 21.17 | 21.7  | 22.41 |
| SPEG         | 20.12 | 19.74 | 20.27 | 19.84 | 18.09 | 21.18 | 17.42 | 19.38 |
| SMG7         | 20.88 | 20.57 | 21.26 | 21.72 | 21.57 | 21.18 | 21.87 | 22.21 |
| AKAP2        | 15.54 | 14.99 | 16.96 | 18.18 | 22    | 21.19 | 25.6  | 24.16 |
| LOC107985355 | 20.03 | 16.08 | 20    | 26.39 | 20.13 | 21.19 | 31.95 | 26.44 |
| SPPL2B       | 18.3  | 17.91 | 19.14 | 18.2  | 18.39 | 21.2  | 18.68 | 18.33 |
| ATG101       | 22.68 | 22.9  | 20.78 | 19.75 | 19.89 | 21.2  | 16.13 | 19.84 |
| GLYR1        | 18.03 | 19.72 | 20.97 | 20.15 | 20.25 | 21.2  | 20.66 | 21.74 |
| PACS2        | 21.14 | 22.03 | 20.45 | 19.7  | 21.96 | 21.22 | 20    | 19.75 |
| MAPK9        | 16.88 | 16.04 | 19.05 | 20.98 | 19.45 | 21.22 | 24.91 | 23.64 |
| WHSC1        | 21.87 | 20.64 | 21.61 | 21.4  | 21.22 | 21.23 | 21.88 | 21.07 |
| SIN3B        | 20.47 | 19.5  | 19.33 | 20.31 | 22.01 | 21.24 | 19.83 | 20.41 |
| ALDH1B1      | 19.08 | 19.24 | 19.73 | 17.62 | 22.38 | 21.24 | 19.6  | 21.18 |
| PML          | 28.26 | 28.22 | 24.79 | 24.88 | 21.12 | 21.25 | 15.98 | 19.32 |
| PRRC1        | 21.81 | 21.91 | 25.02 | 24.67 | 22.8  | 21.25 | 28.16 | 25.42 |
| HAGHL        | 18.1  | 16.68 | 15.42 | 15.01 | 18.03 | 21.26 | 14.91 | 16.49 |
| KRT6A        | 19.48 | 17.65 | 19.6  | 18.42 | 21.77 | 21.26 | 19.01 | 17.99 |
| FHL3         | 22.59 | 27.33 | 22.86 | 22.05 | 21.64 | 21.26 | 17.25 | 19.25 |
| MAP2K7       | 21.54 | 20.96 | 20.84 | 19.72 | 22.69 | 21.27 | 16.95 | 18.5  |
| MTCL1        | 17.34 | 15.85 | 18.05 | 18.59 | 19.75 | 21.27 | 21.31 | 20.72 |
| TRAPPC4      | 19.55 | 18.3  | 20.61 | 19.85 | 20.7  | 21.27 | 20.36 | 21.14 |
| COMMD7       | 25.81 | 26.23 | 24.16 | 23.74 | 22.05 | 21.27 | 19.04 | 22.85 |
| BYSL         | 18.04 | 19.72 | 17.87 | 17.26 | 19.9  | 21.28 | 17.47 | 16.38 |
| SMYD2        | 20.65 | 21.08 | 18.72 | 18.44 | 20.21 | 21.29 | 22.6  | 20.7  |
| SAC3D1       | 15.96 | 17.35 | 15.36 | 13.85 | 20.07 | 21.31 | 14.49 | 15.87 |
| DEDD         | 21.9  | 21.3  | 21.35 | 20    | 20.35 | 21.31 | 19.4  | 20.35 |
| ORMDL2       | 23.04 | 25.67 | 23.07 | 24.01 | 24.25 | 21.31 | 23.55 | 23.99 |
| NLE1         | 19.58 | 21.59 | 19.53 | 17.61 | 21.43 | 21.32 | 16.78 | 17.66 |
| CDKN2D       | 20.11 | 19.62 | 17.78 | 17.57 | 20.51 | 21.32 | 17.87 | 17.92 |
| YRDC         | 19.73 | 20.35 | 19.43 | 19.48 | 23.98 | 21.32 | 21.61 | 21.87 |
| UCHL5        | 20.78 | 20.8  | 24.43 | 24.59 | 24.41 | 21.32 | 34.09 | 30.03 |
| TNFAIP1      | 22.54 | 22.98 | 20.73 | 20.74 | 22.1  | 21.33 | 19.45 | 21.45 |
| TXNDC17      | 23.4  | 22.99 | 23.04 | 21.75 | 23.3  | 21.33 | 23.55 | 21.57 |
| PPP1R16A     | 20.99 | 21    | 19.91 | 19.17 | 18.19 | 21.36 | 14.84 | 16.7  |
| PPP1CB       | 20.06 | 20.47 | 22.16 | 25.48 | 21.06 | 21.36 | 32.81 | 30.53 |
| TFPT         | 20.14 | 20.89 | 22.08 | 20.13 | 22.05 | 21.39 | 16.73 | 19.44 |
| CDK1         | 20.65 | 20.06 | 19.65 | 21.42 | 20.93 | 21.39 | 29.52 | 25.51 |
| ST6GALNAC4   | 19.58 | 22.24 | 18.12 | 18.2  | 21.47 | 21.4  | 15.88 | 17.11 |
| PRMT7        | 21.68 | 20.58 | 20.14 | 20.21 | 21.34 | 21.4  | 18.45 | 18.66 |
| RPA1         | 22.99 | 21.92 | 21.79 | 21.78 | 22.71 | 21.4  | 22.7  | 21.1  |
| RBL2         | 19.47 | 18.03 | 21.14 | 23.83 | 22.76 | 21.4  | 33.09 | 28.65 |
| URM1         | 22.45 | 19.92 | 19.1  | 19.63 | 20.98 | 21.41 | 18.97 | 18.63 |
| AXIN1        | 21.59 | 21.02 | 20.36 | 20.54 | 19.89 | 21.42 | 17.24 | 18.68 |
| TRIAP1       | 16.54 | 16.39 | 17.47 | 16.49 | 22.61 | 21.42 | 23.46 | 23.19 |
| NGF          | 29.28 | 29.23 | 25.96 | 26.34 | 20.23 | 21.43 | 18.88 | 21.78 |
| FJX1         | 18.9  | 19.19 | 18.83 | 16.44 | 19.99 | 21.46 | 14.96 | 16.43 |
| FUBP3        | 19    | 17.76 | 20.85 | 21.92 | 21.8  | 21.46 | 24.87 | 22.73 |
| PUM3         | 15.76 | 15.51 | 20.23 | 20.87 | 22.1  | 21.47 | 31.35 | 27.37 |
| FAM60A       | 21.21 | 21.3  | 20.69 | 21.88 | 22.94 | 21.48 | 26.78 | 23.55 |
| MFF          | 20.06 | 21.68 | 22.79 | 20.64 | 23.61 | 21.48 | 27.71 | 23.94 |
| WNK1         | 19.74 | 19.62 | 21.93 | 23.22 | 21.58 | 21.49 | 25.29 | 24.66 |
| DPM2         | 20.33 | 22.09 | 20.17 | 18.67 | 20.24 | 21.5  | 16.09 | 20.12 |
| EAPP         | 21.21 | 22.34 | 22.03 | 23.95 | 23.97 | 21.54 | 25.97 | 24.72 |
| ZMIZ1        | 22.38 | 22.51 | 22.97 | 23.74 | 19.76 | 21.56 | 19.55 | 21.21 |
| TM9SF1       | 23.88 | 22.84 | 22.11 | 21.47 | 20.54 | 21.57 | 19.23 | 20.35 |
| SEC14L2      | 23.71 | 25.4  | 22.77 | 21.74 | 21.96 | 21.57 | 19.04 | 20.88 |
| WDR59        | 21.86 | 21.96 | 22.45 | 21.54 | 23.9  | 21.57 | 24.18 | 24.2  |
| TSPAN14      | 22.51 | 22.34 | 23.6  | 21.05 | 21.58 | 21.58 | 20.91 | 21.39 |
| C16orf45     | 20.44 | 20.4  | 21    | 19.78 | 21.98 | 21.58 | 20.68 | 21.75 |
| PBX2         | 21.42 | 23.56 | 22.18 | 21.63 | 21.52 | 21.58 | 21.26 | 23.68 |
| HES4         | 31.19 | 27.31 | 27.7  | 28.89 | 18.36 | 21.6  | 15.01 | 16.83 |
| KATNB1       | 21.21 | 21.14 | 18.82 | 18.66 | 21.24 | 21.6  | 17.17 | 18.1  |
| FANCG        | 22.06 | 23.09 | 21.92 | 18.63 | 21.68 | 21.61 | 18.09 | 18.76 |
| C11orf24     | 21.22 | 21.54 | 21.95 | 21.28 | 20.79 | 21.61 | 18.9  | 20.28 |
| CHMP6        | 23.95 | 26.18 | 22.44 | 20.36 | 21.74 | 21.61 | 18.9  | 20.92 |
| PPP5C        | 21.22 | 22.12 | 20.53 | 18.78 | 21.11 | 21.62 | 18.25 | 19.45 |
| LBR          | 20.82 | 18.97 | 23.01 | 25.61 | 22.33 | 21.62 | 31.22 | 29.89 |
| ASCC2        | 21.62 | 21.81 | 22.57 | 21.94 | 23.28 | 21.63 | 19.04 | 19.86 |
| NXN          | 22.23 | 21.39 | 21.91 | 18.96 | 21.37 | 21.63 | 17.86 | 21.01 |
| CDC26        | 20.27 | 23.05 | 21.07 | 23.2  | 20.81 | 21.63 | 25.29 | 27.45 |
| TRIP12       | 20.93 | 20.33 | 23.41 | 24.17 | 22.74 | 21.64 | 28.96 | 26.11 |
| TMEM201      | 20.64 | 21.13 | 19.97 | 19.19 | 20.17 | 21.65 | 15.84 | 18.96 |
| TBC1D16      | 22    | 22.51 | 21.32 | 19.1  | 19.11 | 21.65 | 16.62 | 19.04 |
| CC2D1B       | 21.31 | 21.87 | 20.44 | 20.38 | 20.92 | 21.65 | 20.16 | 19.53 |
| RPS6KA4      | 21.27 | 20.83 | 20.4  | 18.68 | 20.35 | 21.66 | 13.9  | 16.49 |
| BFAR         | 21.08 | 21.1  | 22.62 | 22.52 | 21.81 | 21.66 | 23.77 | 21.89 |
| PIR          | 18.91 | 20.62 | 18.9  | 19.65 | 21.8  | 21.68 | 20.66 | 23.14 |
| NCS1         | 20.19 | 21.85 | 20.61 | 19.95 | 20.62 | 21.7  | 18.38 | 19.69 |
| AFAP1        | 22.87 | 22.12 | 22.72 | 22.75 | 21.08 | 21.71 | 22.43 | 22.32 |
| C14orf119    | 23.57 | 22.86 | 23.33 | 20.92 | 22.04 | 21.71 | 21.96 | 25.14 |
| CFDP1        | 19.65 | 21.65 | 22.2  | 22.31 | 22.2  | 21.71 | 25.53 | 26.83 |
| CPSF3        | 19.88 | 20.63 | 20.05 | 22.68 | 22.94 | 21.73 | 26.89 | 22.26 |
| GPR108       | 21.23 | 21.49 | 18.97 | 18.45 | 21.63 | 21.74 | 18.63 | 21.05 |
| JOSD1        | 21.35 | 21.58 | 21.54 | 21.93 | 22.17 | 21.76 | 21.41 | 21.89 |
| MAP2K1       | 23.13 | 22.42 | 23.04 | 20.95 | 22.75 | 21.77 | 20.6  | 21.69 |
| YEATS2       | 27.22 | 26.94 | 28.59 | 30.01 | 22.44 | 21.77 | 25.93 | 24.72 |

|          |       |       |       |       |       |       |       |       |
|----------|-------|-------|-------|-------|-------|-------|-------|-------|
| SUB1     | 22.06 | 24.46 | 23.06 | 22.09 | 21.87 | 21.77 | 29.2  | 25.48 |
| TMCO3    | 21.35 | 20.76 | 22.73 | 23.63 | 23.15 | 21.78 | 22.05 | 22.24 |
| AARSD1   | 21.77 | 21.04 | 21.69 | 20.65 | 22.84 | 21.79 | 20.28 | 20.82 |
| UCK2     | 20.84 | 21.15 | 21.57 | 20.68 | 21.94 | 21.8  | 20.5  | 21.04 |
| DHFR     | 22.25 | 17.98 | 23.02 | 22.32 | 23.94 | 21.8  | 25.37 | 21.62 |
| PMAIP1   | 21.08 | 23.69 | 23.74 | 24.23 | 23.93 | 21.8  | 32.9  | 26.94 |
| PIGO     | 23.48 | 22.41 | 21.16 | 20.49 | 20.81 | 21.82 | 18.93 | 21.71 |
| ERLIN1   | 21.92 | 22.28 | 23.31 | 23.72 | 20.99 | 21.83 | 24.44 | 22.49 |
| MGAT5    | 24.64 | 25.8  | 24.67 | 24.59 | 20.74 | 21.83 | 22.17 | 23.9  |
| TFB1M    | 20.31 | 20.42 | 20.61 | 20.93 | 21.71 | 21.84 | 26.48 | 23.67 |
| ERAP1    | 24.59 | 23.71 | 26.32 | 28.23 | 23.92 | 21.84 | 31.25 | 27.28 |
| CERS5    | 23.41 | 24.68 | 23.46 | 22.5  | 22.54 | 21.85 | 24.68 | 23.2  |
| DDX47    | 24.03 | 23.45 | 22.33 | 24.31 | 24.71 | 21.86 | 23.89 | 23.31 |
| LLGL1    | 22.25 | 22.55 | 21.43 | 19.65 | 20.66 | 21.87 | 16.33 | 18.23 |
| MTMR14   | 21.28 | 21.76 | 20.12 | 19.37 | 22    | 21.87 | 18.72 | 19.93 |
| VPS16    | 21.67 | 22.08 | 21.41 | 19.22 | 21.85 | 21.88 | 19.07 | 19.24 |
| EIF2B1   | 20.03 | 18.73 | 20.45 | 21.21 | 23.3  | 21.88 | 23.92 | 22.79 |
| RAF1     | 22.35 | 22.86 | 21.61 | 21.5  | 23.58 | 21.88 | 24.56 | 23.15 |
| SPOP     | 20.7  | 22.93 | 21.6  | 21.52 | 25.96 | 21.88 | 25.55 | 23.27 |
| CEP170B  | 19.6  | 18.15 | 19    | 19.59 | 20.62 | 21.89 | 19.06 | 18.86 |
| C19orf66 | 28.6  | 28.62 | 28    | 27.78 | 21.81 | 21.89 | 21.52 | 20.72 |
| NCAPG2   | 20.94 | 18.05 | 22.73 | 24.34 | 24.18 | 21.89 | 28.75 | 24.71 |
| DGAT1    | 20.12 | 22.45 | 21.47 | 19.46 | 21.31 | 21.9  | 18.49 | 19.96 |
| SNRNP25  | 20.95 | 23.32 | 21.74 | 19.27 | 22.38 | 21.91 | 18.29 | 18.48 |
| PIGG     | 22.75 | 20.8  | 20.11 | 22.08 | 22.31 | 21.92 | 21.92 | 22.76 |
| XRCC3    | 23.98 | 21.91 | 21.78 | 20.39 | 21.67 | 21.95 | 17.57 | 19.71 |
| DESI1    | 20.88 | 20.1  | 19.33 | 19.33 | 22.96 | 21.95 | 21.93 | 22.69 |
| SPCS2    | 21.99 | 22.73 | 22.27 | 23.64 | 24.6  | 21.95 | 27.52 | 24.27 |
| CAPN15   | 22.52 | 21.69 | 20.32 | 18.41 | 21.35 | 21.97 | 17.71 | 17.99 |
| VAPA     | 20.96 | 21.39 | 22.81 | 22.49 | 23.8  | 21.97 | 27.86 | 25.72 |
| POLR2F   | 18.16 | 18.59 | 17.52 | 19.44 | 20.59 | 21.99 | 17.76 | 18.22 |
| TNPO3    | 22.26 | 21.34 | 22.35 | 23.59 | 23.21 | 22.01 | 24.55 | 23.52 |
| UNC119   | 24.13 | 23.3  | 24.91 | 23.56 | 23.91 | 22.02 | 17.64 | 19.2  |
| SMURF1   | 21.89 | 21.43 | 21.53 | 22.07 | 20.89 | 22.02 | 21.1  | 21.48 |
| SEMA3B   | 22.61 | 22.47 | 20.95 | 20.8  | 20.82 | 22.03 | 18.69 | 18.4  |
| FAM160B2 | 22.71 | 21.78 | 20.33 | 20.88 | 20.41 | 22.03 | 19.97 | 21.04 |
| HBP1     | 18.49 | 19.41 | 22.61 | 22.34 | 21.24 | 22.03 | 28.13 | 24.83 |
| PIGQ     | 20.58 | 19.85 | 18.9  | 17.58 | 19.47 | 22.04 | 16.6  | 17.55 |
| NOC4L    | 22.72 | 23.03 | 20.44 | 19.55 | 23.85 | 22.04 | 16.14 | 17.98 |
| ITFG1    | 21.04 | 19.35 | 23.31 | 25.45 | 21.48 | 22.04 | 30.03 | 29.08 |
| MEGF8    | 25.09 | 24.98 | 24.33 | 23.95 | 20.04 | 22.05 | 17.87 | 19.18 |
| GOSR2    | 23.76 | 21.35 | 23.43 | 23.61 | 23.54 | 22.06 | 23.4  | 23.63 |
| DYNC1L12 | 20.4  | 18.73 | 21.75 | 23.54 | 21.55 | 22.07 | 30.02 | 24.17 |
| DNAJB2   | 24.33 | 23.19 | 24.33 | 21.59 | 20.99 | 22.08 | 18.72 | 21.3  |
| KDM5B    | 26.01 | 25.69 | 26.56 | 26.84 | 22.26 | 22.08 | 25.35 | 26.18 |
| NPAS2    | 21.73 | 22.34 | 23.12 | 22.84 | 21.56 | 22.09 | 22.87 | 23.42 |
| VBP1     | 24.6  | 23.83 | 23.02 | 24.49 | 24.95 | 22.11 | 30.59 | 27.31 |
| SIRT7    | 24.89 | 23.68 | 22.3  | 22.54 | 23.16 | 22.13 | 18.88 | 20.41 |
| OAZ2     | 22.54 | 22.76 | 22.62 | 21.43 | 22.5  | 22.13 | 19.19 | 22.57 |
| MRPS22   | 17.29 | 20.17 | 19.63 | 21    | 22.53 | 22.13 | 25.4  | 23.23 |
| SENP3    | 22.6  | 23.39 | 21.15 | 20.7  | 23.04 | 22.16 | 19.78 | 20.24 |
| ABHD8    | 24.77 | 24.64 | 22.93 | 21.63 | 20.58 | 22.17 | 15.87 | 18.49 |
| VEGFA    | 29.11 | 27.74 | 27.25 | 28.94 | 23.05 | 22.17 | 28.39 | 26.39 |
| PLEKHB1  | 22.22 | 25.23 | 22.2  | 20.77 | 22.46 | 22.19 | 19.99 | 22.37 |
| GPR137   | 21.64 | 22.65 | 21.2  | 19.5  | 20.39 | 22.2  | 16.2  | 19.44 |
| ARHGEF10 | 20    | 18.5  | 20.61 | 20.47 | 21.31 | 22.2  | 23.74 | 23.15 |
| NOL3     | 21.28 | 19.78 | 19.17 | 19.45 | 18.62 | 22.21 | 21.34 | 20.33 |
| MGAT2    | 22.75 | 22.06 | 22.52 | 22.81 | 20.99 | 22.21 | 21.8  | 21.91 |
| POFUT2   | 22.56 | 22.57 | 20.76 | 22.16 | 21.03 | 22.22 | 19.96 | 20.93 |
| MLEC     | 22.66 | 24.38 | 22.92 | 23.46 | 22.18 | 22.22 | 22.79 | 23.19 |
| PYM1     | 23.49 | 23.8  | 22.15 | 20.48 | 23.55 | 22.23 | 19.24 | 19.4  |
| AIM1     | 20.12 | 18.92 | 21.71 | 23.79 | 22.91 | 22.23 | 27.26 | 24.02 |
| SLC43A2  | 18.59 | 19.56 | 17.89 | 16.58 | 21.05 | 22.24 | 16.65 | 18.55 |
| TAF12    | 20.33 | 20.3  | 22.97 | 24.12 | 25.34 | 22.24 | 25.37 | 26.46 |
| TLCD1    | 22.05 | 23.1  | 20.2  | 19.11 | 23.57 | 22.29 | 19.87 | 20.53 |
| WIPI2    | 21.58 | 22.65 | 21.12 | 20.44 | 23.24 | 22.29 | 20.58 | 20.76 |
| PARP4    | 23.49 | 21.49 | 24.73 | 26.09 | 23.28 | 22.3  | 28.6  | 25.12 |
| PSMC6    | 21.43 | 22.02 | 20.55 | 23.53 | 23.74 | 22.3  | 28.48 | 26.27 |
| SMPD1    | 21.11 | 23.92 | 21.18 | 19.86 | 18.73 | 22.31 | 17.66 | 19.25 |
| MMAB     | 18.86 | 20.78 | 16.37 | 16.69 | 24.57 | 22.33 | 18.76 | 20.76 |
| RNF20    | 21.61 | 20.81 | 23.17 | 23.64 | 23.28 | 22.34 | 25.37 | 24.58 |
| DUSP7    | 20.23 | 20.06 | 20.41 | 20.76 | 22.17 | 22.35 | 19.93 | 22.39 |
| PDXP     | 22.5  | 20.99 | 20.78 | 17.7  | 20.04 | 22.36 | 17.04 | 16.51 |
| NRBP2    | 20.38 | 19.58 | 20.47 | 20.82 | 19.03 | 22.36 | 24.5  | 23.68 |
| SLBP     | 22.38 | 22.02 | 23.72 | 25.46 | 23.79 | 22.36 | 24.62 | 24.25 |
| PEG10    | 26.93 | 25.89 | 28.87 | 34.82 | 21.19 | 22.37 | 27.41 | 25.8  |
| AGPAT3   | 23.12 | 23.57 | 22.43 | 22.96 | 20.94 | 22.38 | 19.46 | 21.76 |
| SCCPDH   | 21.81 | 21.98 | 22.9  | 23.76 | 22.88 | 22.38 | 26.99 | 23.99 |
| ZBTB4    | 21.97 | 22.83 | 21.64 | 21.69 | 21.69 | 22.39 | 19.21 | 21.05 |
| TIMM13   | 23.68 | 21.42 | 21.04 | 20.71 | 22.15 | 22.41 | 16.42 | 18.38 |
| PRKCDBP  | 25.89 | 27.21 | 25.29 | 22.36 | 21.61 | 22.43 | 15.55 | 17.29 |
| THOC5    | 19.02 | 19.77 | 18.6  | 18.2  | 23.09 | 22.43 | 20.55 | 21.24 |
| PSME4    | 19.8  | 18.27 | 21.77 | 23.51 | 23.29 | 22.44 | 30.42 | 27.21 |
| NGFR     | 23.32 | 24.51 | 20.68 | 21.25 | 23.56 | 22.46 | 18.91 | 23.45 |
| ERLEC1   | 20.64 | 20.81 | 23.01 | 24.83 | 24.69 | 22.46 | 32.62 | 28.51 |
| ZNF687   | 25.86 | 26.19 | 24.62 | 23.12 | 23.21 | 22.47 | 18.56 | 20.84 |
| HSDL2    | 18.41 | 15.85 | 20.78 | 21.52 | 23.3  | 22.47 | 30.46 | 25.56 |

|          |       |       |       |       |       |       |       |       |
|----------|-------|-------|-------|-------|-------|-------|-------|-------|
| UBE2E1   | 21.43 | 22.86 | 23.28 | 23.7  | 25.43 | 22.47 | 29.83 | 25.84 |
| PREX1    | 20.34 | 19.72 | 19.41 | 17.71 | 21.94 | 22.49 | 19.14 | 19.62 |
| PI4KA    | 20.85 | 20    | 20.39 | 20.02 | 21.52 | 22.49 | 23.25 | 22.72 |
| MYO19    | 21.3  | 18.82 | 20.6  | 22.45 | 21.62 | 22.49 | 25.14 | 23.28 |
| SSR3     | 20.74 | 20.2  | 21.1  | 21.24 | 24.27 | 22.49 | 26.27 | 24.32 |
| PPP3R1   | 21.27 | 20.69 | 23.46 | 23.92 | 24.53 | 22.49 | 25.71 | 24.34 |
| CDC27    | 21.33 | 19.32 | 21.82 | 26.05 | 23.46 | 22.49 | 32.41 | 27.27 |
| ELP2     | 20.89 | 20.7  | 21.14 | 21.01 | 22.68 | 22.5  | 24.14 | 22.62 |
| MTG2     | 22.19 | 22.63 | 21.9  | 22.3  | 21.37 | 22.52 | 21.55 | 20.9  |
| ECI2     | 23.18 | 23.32 | 23.31 | 21.77 | 23.88 | 22.55 | 24.61 | 26    |
| HELZ2    | 44.88 | 44.04 | 42.86 | 42.63 | 20.18 | 22.56 | 18.5  | 19.33 |
| PHF5A    | 21.14 | 20.13 | 22.02 | 21.44 | 21.97 | 22.56 | 20.18 | 20.29 |
| RAI1     | 25.65 | 23.61 | 25.07 | 24.23 | 21.97 | 22.56 | 19.81 | 20.42 |
| SIRPA    | 21    | 23.94 | 21.47 | 22.19 | 23.28 | 22.56 | 20.36 | 22.84 |
| TRIM14   | 29.4  | 27.58 | 27.37 | 29.47 | 20.15 | 22.58 | 20.88 | 19.06 |
| C8orf33  | 18.23 | 20.2  | 18.66 | 17.67 | 22.6  | 22.58 | 21.89 | 20.92 |
| GLTP     | 21.78 | 22.23 | 21.66 | 22.37 | 23.48 | 22.58 | 23.19 | 24.07 |
| RPA2     | 22.49 | 23.52 | 21.56 | 22.95 | 26.17 | 22.59 | 26.67 | 23.15 |
| ARGLU1   | 21.52 | 20.93 | 23.12 | 28.49 | 23.08 | 22.59 | 34.04 | 32    |
| UBAC2    | 19.94 | 20.68 | 20.31 | 19.94 | 22.03 | 22.6  | 20.73 | 20.75 |
| DPH2     | 20.44 | 18.37 | 18.81 | 17.86 | 22.03 | 22.61 | 19.9  | 20.23 |
| MPV17L2  | 19.47 | 20.83 | 19.61 | 19.37 | 21.59 | 22.61 | 19.55 | 20.43 |
| CRKL     | 25.92 | 25.69 | 25.72 | 25.34 | 22.98 | 22.63 | 22.19 | 21.72 |
| WDTC1    | 21.73 | 23.29 | 22.95 | 21.1  | 21.75 | 22.64 | 20.54 | 22.23 |
| YIPF4    | 19.15 | 19.2  | 20.1  | 20.74 | 21.16 | 22.65 | 28.83 | 25.69 |
| HNRNPDL  | 20.57 | 20.63 | 22.16 | 25.4  | 24.02 | 22.65 | 34.34 | 29.69 |
| NELFA    | 22.12 | 23.68 | 22.06 | 21.48 | 21.15 | 22.67 | 16.71 | 18.93 |
| TRUB2    | 21.31 | 20.85 | 20.14 | 18.37 | 23.53 | 22.67 | 21.29 | 22.27 |
| ADSS     | 20.1  | 18.73 | 21.14 | 24.42 | 24.46 | 22.67 | 33.01 | 27.59 |
| FBXO7    | 21.43 | 23.15 | 22.3  | 21.78 | 22.99 | 22.7  | 21.9  | 22.76 |
| ETHE1    | 25.57 | 25.13 | 22.25 | 22.17 | 25.73 | 22.71 | 18.46 | 21.58 |
| OSMR     | 22.33 | 22.28 | 24.83 | 25.74 | 22.2  | 22.73 | 28.43 | 25.94 |
| HMGNA4   | 21.07 | 19.83 | 20.42 | 21.92 | 24.44 | 22.73 | 30.73 | 26.36 |
| EPS15L1  | 24.11 | 23.22 | 21.45 | 21.26 | 21.6  | 22.74 | 20.26 | 20.98 |
| ARFIP2   | 23.09 | 22.58 | 22.12 | 20.96 | 23.32 | 22.74 | 21.09 | 21.74 |
| GGA1     | 21.41 | 21.85 | 21.52 | 19.62 | 21.38 | 22.75 | 21.49 | 20.47 |
| STARD3NL | 19.03 | 22.18 | 19.4  | 23.1  | 22.1  | 22.75 | 26.2  | 21    |
| TSSC4    | 22.76 | 20.68 | 19    | 19.53 | 20.54 | 22.76 | 15.79 | 17.84 |
| CYTH2    | 21.16 | 20.58 | 20.42 | 19.74 | 24    | 22.77 | 21.74 | 20.83 |
| OAS3     | 51.16 | 50.88 | 50.52 | 50.76 | 22.94 | 22.77 | 24.06 | 20.92 |
| TCEAL9   | 25.79 | 26.46 | 25.94 | 27.66 | 24.23 | 22.77 | 33.89 | 31    |
| TRIB3    | 21.63 | 23.88 | 21.54 | 19.94 | 21.17 | 22.78 | 17.08 | 19.03 |
| HDAC10   | 19.12 | 19.76 | 18.7  | 18.32 | 20.94 | 22.79 | 20.38 | 20.46 |
| BRE      | 22.42 | 24.05 | 23.9  | 24.89 | 23.49 | 22.79 | 23.18 | 22.68 |
| ISCA2    | 24.72 | 25.93 | 23.15 | 22.07 | 23.58 | 22.79 | 21.04 | 24.22 |
| HSD17B3  | 22.28 | 24.28 | 22.68 | 21.92 | 19.18 | 22.8  | 19.76 | 20.52 |
| MRPS28   | 20.27 | 19.73 | 20.44 | 18.59 | 22.55 | 22.81 | 26.4  | 21.24 |
| MIB2     | 21.5  | 21.54 | 21.06 | 19.22 | 22.38 | 22.82 | 18.32 | 19.07 |
| MRPL17   | 24.34 | 24.29 | 22.33 | 23.51 | 24.14 | 22.82 | 21.37 | 21.59 |
| TMEM9B   | 20.77 | 21.42 | 22.77 | 22.14 | 24.24 | 22.82 | 28.79 | 23.98 |
| GGH      | 22.61 | 19.94 | 24.87 | 25.84 | 24.74 | 22.82 | 35.36 | 25.61 |
| CFAP36   | 23.86 | 22.01 | 24.06 | 27.63 | 24.72 | 22.82 | 30.79 | 26.3  |
| AGPAT2   | 25.59 | 27.1  | 24.47 | 22.26 | 21.16 | 22.84 | 17.14 | 17.56 |
| TOR1A    | 22.98 | 21.58 | 21.25 | 20.7  | 22.07 | 22.84 | 23.56 | 20.04 |
| RASSF7   | 25.25 | 26.39 | 22.03 | 21.63 | 19.78 | 22.86 | 18.34 | 19.06 |
| GBA2     | 23.11 | 23.3  | 22.39 | 22.72 | 23.81 | 22.86 | 23.89 | 22.17 |
| CNOT11   | 23    | 23.5  | 22.47 | 22.29 | 23.31 | 22.86 | 22.78 | 23.86 |
| ADCY3    | 20.41 | 21.06 | 19.67 | 20.33 | 21.89 | 22.89 | 19.57 | 20.28 |
| PPP2R5C  | 21.68 | 21.29 | 22.65 | 23.08 | 24.86 | 22.91 | 33.97 | 29.72 |
| USP14    | 20.66 | 19.39 | 22.58 | 21.81 | 23.44 | 22.92 | 29.52 | 26.65 |
| DCAF6    | 21.73 | 20.5  | 22    | 25.74 | 24.11 | 22.96 | 30.55 | 26.9  |
| DALRD3   | 24.08 | 24.45 | 22.79 | 21.23 | 20.76 | 22.97 | 19.07 | 19.55 |
| SHB      | 21.98 | 23.51 | 22.34 | 20.81 | 21.22 | 22.97 | 18.94 | 19.73 |
| PLSCR3   | 22.76 | 24.07 | 23.09 | 21    | 23.4  | 22.98 | 17.17 | 20.11 |
| IMPAD1   | 19.31 | 17.77 | 21.81 | 23.52 | 22.6  | 23    | 29.63 | 26.24 |
| CENPV    | 21.55 | 20.37 | 21.99 | 20.41 | 20.11 | 23.01 | 17.49 | 18.72 |
| PSKH1    | 23.8  | 25.66 | 24.3  | 22.18 | 22.56 | 23.01 | 17.61 | 20.22 |
| PMM2     | 23.09 | 20.73 | 21.33 | 23.13 | 23.3  | 23.02 | 22.15 | 23.54 |
| 44257    | 24.96 | 22.89 | 23.14 | 20.43 | 23.06 | 23.03 | 17.79 | 21.53 |
| SH2B1    | 22.27 | 22.54 | 21.87 | 22.52 | 23.36 | 23.03 | 21.85 | 23.4  |
| PAF1     | 25    | 25.74 | 25.07 | 21.38 | 24.48 | 23.04 | 20.22 | 21.98 |
| ZNF395   | 29.99 | 29.06 | 29.54 | 29.18 | 23.2  | 23.04 | 21.92 | 22.07 |
| VPS37B   | 21.88 | 21.92 | 22.14 | 21.19 | 22.56 | 23.05 | 19.06 | 20.02 |
| RECQL4   | 22.36 | 19.58 | 21.1  | 18.98 | 22.18 | 23.06 | 18.55 | 17.76 |
| UGP2     | 21.76 | 20.83 | 22.46 | 25.74 | 23.47 | 23.06 | 32.7  | 28.78 |
| HEBP1    | 21.02 | 21.89 | 23.15 | 21.5  | 22.92 | 23.08 | 19.91 | 20.52 |
| SKI      | 24.79 | 25.79 | 23.99 | 24.37 | 21.32 | 23.08 | 19.01 | 21.51 |
| FAF1     | 22.97 | 21.74 | 22.63 | 23.4  | 24.31 | 23.08 | 23.56 | 23.74 |
| DPH5     | 23.9  | 22.12 | 23.09 | 22.51 | 26.49 | 23.08 | 29.33 | 26.39 |
| TNS3     | 21.52 | 20.67 | 20.91 | 21.19 | 23.47 | 23.11 | 22.46 | 21.94 |
| AP3B1    | 21.63 | 18.5  | 22.56 | 24.19 | 25.23 | 23.11 | 30.81 | 26.81 |
| SMIM12   | 21.42 | 22.89 | 21.41 | 19.21 | 23.62 | 23.13 | 18.26 | 20.68 |
| SDC4     | 26.27 | 26.96 | 26.5  | 27.58 | 26.86 | 23.13 | 25.6  | 24.49 |
| DOK1     | 25.5  | 25.68 | 23.54 | 22.91 | 20.45 | 23.15 | 16.53 | 18.77 |
| BAIAP2   | 23.54 | 23.89 | 22.19 | 21.89 | 22.91 | 23.16 | 19.43 | 20.15 |
| SMTN     | 20.23 | 19.76 | 18.62 | 18.89 | 22.96 | 23.17 | 17.86 | 21.84 |
| SEL1L3   | 20.3  | 20.11 | 20.57 | 22.01 | 23.3  | 23.17 | 26.68 | 24.59 |
| LETMD1   | 20.41 | 18.38 | 22.55 | 23.05 | 25.24 | 23.17 | 27.48 | 27.39 |

|          |       |       |       |       |       |       |       |       |
|----------|-------|-------|-------|-------|-------|-------|-------|-------|
| CCS      | 24.78 | 26.12 | 23.23 | 22.64 | 23.19 | 23.18 | 19.64 | 20.77 |
| PHF1     | 22.81 | 23.57 | 22.65 | 22.4  | 23.78 | 23.18 | 22.35 | 21.44 |
| MAGOH    | 23.39 | 24.92 | 23.62 | 27.27 | 26.13 | 23.18 | 27.75 | 30.99 |
| BTBD6    | 21.96 | 21.43 | 22.76 | 20.94 | 20.62 | 23.21 | 17.89 | 18.05 |
| MAFG     | 21.44 | 21.15 | 21.39 | 21.53 | 24.71 | 23.21 | 21.61 | 21.88 |
| UBFD1    | 28.98 | 27.46 | 24.34 | 26.33 | 24.3  | 23.21 | 23.97 | 22.24 |
| MTHFD1L  | 24.17 | 23.01 | 21.65 | 23.67 | 26.11 | 23.21 | 22.85 | 23.37 |
| ATG13    | 23.76 | 24.27 | 22.76 | 22.19 | 23.57 | 23.25 | 21.91 | 22.6  |
| ACO1     | 19.46 | 20.22 | 19.41 | 19.37 | 24.03 | 23.27 | 23.72 | 24.08 |
| ORAI1    | 21.8  | 20.5  | 19.91 | 19.33 | 19.47 | 23.3  | 16.16 | 17.76 |
| BCAT2    | 26.32 | 26.11 | 23.16 | 21.42 | 24.04 | 23.3  | 19.39 | 20.32 |
| TP73     | 25.79 | 25.58 | 25.2  | 23    | 22.16 | 23.3  | 19.74 | 21.14 |
| TIMM10   | 22.64 | 22.07 | 21.33 | 20.73 | 25.72 | 23.31 | 21.97 | 20.76 |
| GMMPR2   | 22.36 | 23.99 | 21.55 | 23.6  | 22.7  | 23.31 | 22.74 | 24.36 |
| SLC37A3  | 23.75 | 22.88 | 24.17 | 28.03 | 23.01 | 23.32 | 29.04 | 26.88 |
| TMEM59L  | 39.21 | 42.44 | 38.22 | 35.03 | 20.14 | 23.34 | 15.84 | 18.85 |
| ERAP2    | 23.18 | 21.13 | 25.93 | 31.76 | 24.82 | 23.36 | 39.02 | 32.7  |
| RALGDS   | 24.23 | 23.56 | 25.39 | 24.53 | 22.99 | 23.39 | 20.93 | 22.53 |
| VPS29    | 20.3  | 20.11 | 22.92 | 22.91 | 25.58 | 23.39 | 28.76 | 26.1  |
| NMD3     | 21.74 | 22.31 | 23.45 | 25.87 | 24.48 | 23.4  | 35.11 | 29.31 |
| STK39    | 23.17 | 19.91 | 25.5  | 25.59 | 23.58 | 23.43 | 27.52 | 25.32 |
| GLDC     | 19.88 | 20.56 | 20.27 | 20.33 | 24.12 | 23.45 | 25.38 | 23.31 |
| CAD      | 22.9  | 22    | 21.68 | 20.12 | 22.25 | 23.47 | 20.12 | 21.19 |
| BTG1     | 23.27 | 25.4  | 23.72 | 24.02 | 22.07 | 23.49 | 22.02 | 22.38 |
| GTPBP4   | 21.22 | 20.65 | 22.34 | 22.8  | 24.39 | 23.51 | 28.25 | 28.09 |
| EXT1     | 28.15 | 28.08 | 27.5  | 27.11 | 25.22 | 23.52 | 22.64 | 22.9  |
| MEMO1    | 20.25 | 19.61 | 22.14 | 19.73 | 25.12 | 23.53 | 27.57 | 23.95 |
| GINM1    | 22.9  | 20.14 | 22.63 | 27.18 | 24.69 | 23.53 | 32.63 | 28.03 |
| CDK10    | 21.97 | 22.39 | 20.43 | 19.45 | 25.86 | 23.55 | 22.12 | 23.81 |
| FOXP1    | 19.97 | 18.6  | 21.62 | 20.01 | 20.24 | 23.56 | 21.06 | 21.01 |
| LRRC42   | 24.7  | 26.27 | 24.77 | 24.33 | 24.83 | 23.56 | 25.05 | 23.17 |
| NCKAP1   | 22    | 21.14 | 23.43 | 27.04 | 23.17 | 23.56 | 36.52 | 30.87 |
| C9orf142 | 22.83 | 23.39 | 22.39 | 19.13 | 24.32 | 23.58 | 20.18 | 21.03 |
| PGAP2    | 24.12 | 22.11 | 22.72 | 21.97 | 23.85 | 23.59 | 22.22 | 21.87 |
| TRIM65   | 22.48 | 22.53 | 23.3  | 22.04 | 22.55 | 23.6  | 20.2  | 21.67 |
| CBX4     | 28.29 | 27.54 | 26.56 | 26.72 | 23.12 | 23.61 | 17.5  | 18.75 |
| RPUSD1   | 22.06 | 21.15 | 21.87 | 19.38 | 25.14 | 23.61 | 20.37 | 20.68 |
| MMS19    | 23.94 | 23.35 | 24.21 | 23.04 | 22.9  | 23.62 | 23.59 | 23.55 |
| SGSH     | 22.72 | 23.72 | 22.19 | 21.48 | 21.13 | 23.63 | 17.65 | 19.59 |
| C9orf78  | 19.95 | 21.08 | 21.73 | 23.04 | 25.43 | 23.63 | 25.89 | 26.79 |
|          | 44444 | 25.01 | 26.52 | 25.67 | 23.43 | 22.55 | 23.64 | 22.19 |
| NFU1     | 20.98 | 20.97 | 22.81 | 22.03 | 23.18 | 23.64 | 27.34 | 25.81 |
| KIF20A   | 17.2  | 17.17 | 16.59 | 15.08 | 22.62 | 23.65 | 23.47 | 23.44 |
| PPCS     | 24.14 | 23.12 | 25.1  | 21.58 | 23.94 | 23.66 | 19.53 | 22.44 |
| DDX23    | 24.67 | 26.47 | 25.21 | 24.76 | 24.7  | 23.66 | 23.61 | 23.35 |
| TBL3     | 24.22 | 23.91 | 22.27 | 20.45 | 22.02 | 23.67 | 17.82 | 19.6  |
| VSTM2L   | 19.84 | 21.3  | 18.44 | 17.19 | 25.21 | 23.7  | 18.25 | 20.15 |
| EDC4     | 26.06 | 24.15 | 24.25 | 22.72 | 23.58 | 23.7  | 20.08 | 20.53 |
| PCGF2    | 24.17 | 24.49 | 25.33 | 24    | 23.63 | 23.7  | 20.35 | 21.61 |
| PEX14    | 25.21 | 25.26 | 26.05 | 21.52 | 23.31 | 23.7  | 18.89 | 21.81 |
| LPIN1    | 14.49 | 16.4  | 15.91 | 20.12 | 21.62 | 23.7  | 28.11 | 27.47 |
| NUDT21   | 21.83 | 20.03 | 24.99 | 25.75 | 26.2  | 23.7  | 34.12 | 28.49 |
| SH3BGRL  | 22.8  | 25.14 | 23.72 | 28.1  | 26.85 | 23.7  | 34.93 | 28.54 |
| PIGY     | 22.37 | 22.39 | 23.59 | 24.31 | 24.29 | 23.71 | 27.02 | 23.58 |
| NAE1     | 22.39 | 20.84 | 23.63 | 25.92 | 24.73 | 23.71 | 38.66 | 30.59 |
| LONP2    | 22.42 | 21.93 | 22.74 | 22.01 | 21.42 | 23.72 | 24.65 | 23.54 |
| ZFAND5   | 22.11 | 21.36 | 24.07 | 25.44 | 23.57 | 23.72 | 28.52 | 26.35 |
| MSRB2    | 19.31 | 19.11 | 19.26 | 19.73 | 20.04 | 23.74 | 16.3  | 16.13 |
| MIIP     | 22.26 | 19.64 | 19.87 | 20.46 | 21.31 | 23.74 | 18.85 | 20.84 |
| MAGEF1   | 23.43 | 22.47 | 21.95 | 23.08 | 23.08 | 23.74 | 22.76 | 21.9  |
| KIF1C    | 20.75 | 20.86 | 20.31 | 18.81 | 23.69 | 23.74 | 19.14 | 22.21 |
| PAGR1    | 23.63 | 22.7  | 22.66 | 21.47 | 24.09 | 23.75 | 21.36 | 20.94 |
| FAM173A  | 23.41 | 22.53 | 21.33 | 18.81 | 22.98 | 23.76 | 14.67 | 18.49 |
| TIMM44   | 22.25 | 21.3  | 21.14 | 21.42 | 23.49 | 23.78 | 19.39 | 20.95 |
| WDR5     | 23.26 | 22.99 | 21.7  | 22.74 | 24.97 | 23.78 | 22.94 | 22.83 |
| CMTM8    | 28.57 | 27.56 | 26.96 | 26.65 | 23.6  | 23.79 | 21.11 | 21.4  |
| UTP6     | 21.93 | 22.62 | 23.29 | 23.73 | 27.82 | 23.79 | 30.64 | 26.78 |
| TOR3A    | 23.67 | 23.12 | 21.7  | 21.1  | 23.16 | 23.81 | 21.03 | 22.12 |
| FHL1     | 26.32 | 28.52 | 26.98 | 29.4  | 23.8  | 23.81 | 26.15 | 25.75 |
| PPIF     | 24.91 | 24.02 | 23.52 | 22.98 | 24.62 | 23.82 | 22.53 | 23.76 |
| COX14    | 23.93 | 25.35 | 23.34 | 19.93 | 24.97 | 23.83 | 20.18 | 22.91 |
| TCEAL8   | 24.73 | 24.58 | 26.72 | 29.2  | 24.87 | 23.83 | 31.69 | 28.43 |
| GIGYF1   | 21.78 | 20.4  | 21.67 | 23.16 | 23.46 | 23.85 | 24.75 | 25.2  |
| MOB1A    | 21.57 | 21.3  | 25.21 | 30.17 | 25.37 | 23.85 | 40.14 | 36.11 |
| SDR39U1  | 20.47 | 21.33 | 17.69 | 20.39 | 24.63 | 23.87 | 21.19 | 23.6  |
| TCTN3    | 23.66 | 22.58 | 22    | 24.48 | 25.24 | 23.87 | 26.28 | 24.26 |
| PSMG1    | 20.89 | 22.09 | 20.99 | 19.95 | 26.36 | 23.87 | 28.73 | 25.32 |
| ABRA1    | 24.76 | 23.38 | 23.45 | 26.01 | 25.55 | 23.89 | 25.51 | 25.54 |
| TMEM214  | 23.91 | 24.97 | 23.45 | 24.57 | 23.8  | 23.9  | 21.43 | 21.49 |
| ASNS     | 27.2  | 27.48 | 27.23 | 26.82 | 26.04 | 23.9  | 26.6  | 24.47 |
| TCAF1    | 25.46 | 22.52 | 27.58 | 30.58 | 26.27 | 23.91 | 32.8  | 28.76 |
| IVD      | 25.48 | 25.81 | 25.07 | 23.43 | 24.24 | 23.92 | 23.26 | 24.63 |
| THYN1    | 23.83 | 23.11 | 22.5  | 21.12 | 27.15 | 23.92 | 26    | 27.82 |
| GTPBP3   | 22.86 | 21.19 | 21.89 | 21.78 | 24.16 | 23.93 | 21.39 | 21.64 |
| PI4KB    | 24.53 | 26.26 | 25.26 | 24.35 | 23.18 | 23.93 | 22.38 | 22.8  |
| INPPL1   | 22.87 | 23.28 | 23.17 | 22.77 | 23.77 | 23.93 | 23.53 | 25.07 |
| NAT10    | 24.51 | 23.46 | 22.48 | 22.51 | 23.59 | 23.94 | 23.41 | 23.51 |
| SARNP    | 26.03 | 23.19 | 24.58 | 24.02 | 27.36 | 23.94 | 27.18 | 23.86 |
| NIPAL3   | 19.43 | 19.56 | 20.06 | 20.33 | 23.29 | 23.94 | 24.69 | 24.13 |

|          |       |       |       |       |       |       |       |       |
|----------|-------|-------|-------|-------|-------|-------|-------|-------|
| ZNF532   | 23.96 | 22.77 | 24.91 | 28.98 | 24.72 | 23.95 | 30.59 | 28.54 |
| HYPK     | 22.99 | 23.24 | 22.86 | 24.19 | 27.57 | 23.96 | 21.58 | 22.63 |
| THAP7    | 23.29 | 23.14 | 21.91 | 23.18 | 21.86 | 23.99 | 16.78 | 18.3  |
| SCO2     | 22.12 | 20.65 | 23.13 | 18.98 | 21.4  | 24    | 14.78 | 16.11 |
| TBC1D14  | 21.93 | 21.4  | 21.01 | 22.14 | 24.87 | 24    | 23.46 | 25.22 |
| GNPAT    | 21.76 | 20.17 | 22.75 | 23.66 | 25.17 | 24    | 27.56 | 26.53 |
| PRPF40A  | 22.88 | 22.31 | 23.47 | 27.12 | 24.26 | 24.01 | 37.7  | 33.93 |
| AGBL5    | 22.97 | 22.42 | 23.74 | 22.13 | 23.67 | 24.02 | 20.08 | 22.09 |
| NRM      | 29.07 | 28.9  | 30.48 | 28.18 | 24.47 | 24.02 | 21.63 | 22.15 |
| PLAU     | 21.95 | 24.4  | 23.17 | 22.38 | 23.34 | 24.03 | 22.51 | 23.65 |
| KIAA0101 | 23.14 | 22.8  | 25.37 | 23.12 | 26.61 | 24.03 | 30.32 | 25.27 |
| SAMM50   | 20.81 | 22.69 | 21.28 | 20.16 | 23.63 | 24.04 | 23.1  | 24.77 |
| C12orf75 | 19.95 | 20.15 | 21.48 | 21.06 | 25.93 | 24.05 | 27.59 | 26.76 |
| METAP2   | 20.54 | 18.71 | 23.84 | 27.68 | 25.72 | 24.06 | 38.26 | 33.38 |
| RRP1     | 21.47 | 23.84 | 22.06 | 21.41 | 26.46 | 24.07 | 20.5  | 21.91 |
| SPATC1L  | 25.43 | 25.95 | 23.35 | 23.33 | 24.39 | 24.07 | 19.34 | 23.04 |
| MPI      | 25.41 | 26.2  | 25.69 | 22.63 | 22.82 | 24.09 | 20.7  | 21.49 |
| PRC1     | 20    | 17.87 | 20.93 | 21.17 | 25.69 | 24.09 | 25.83 | 23.66 |
| GATAD2A  | 23.72 | 24.83 | 22.62 | 22.88 | 23.73 | 24.1  | 21.07 | 21.73 |
| SPTLC1   | 23.43 | 23.7  | 24.7  | 27.52 | 28.8  | 24.1  | 33.92 | 29.61 |
| TRIM56   | 24.24 | 22.4  | 24.95 | 27.26 | 22.86 | 24.11 | 25.93 | 25.59 |
| DHX8     | 23.2  | 24.71 | 24.3  | 23.47 | 25.41 | 24.12 | 24.56 | 23.52 |
| CLK3     | 23.24 | 23.13 | 22.46 | 22.94 | 23.43 | 24.15 | 22.88 | 23.94 |
| MUL1     | 22.03 | 22.15 | 20.22 | 20.53 | 22.48 | 24.16 | 22.16 | 22.17 |
| ASXL1    | 25.94 | 23.87 | 27.35 | 25.03 | 26.16 | 24.16 | 25.13 | 26.47 |
| ERV3-1   | 23.51 | 24.4  | 26.11 | 28.85 | 24.87 | 24.16 | 34.94 | 30.3  |
| C21orf59 | 23.5  | 22.87 | 23.98 | 24.32 | 22.79 | 24.17 | 23.68 | 22.97 |
| PRKCD    | 25.99 | 26    | 24.62 | 21.69 | 24.49 | 24.19 | 21.32 | 22.71 |
| SLC38A1  | 18.95 | 17.83 | 21.71 | 24.16 | 26.47 | 24.19 | 39.97 | 33.02 |
| SCAMP4   | 23.96 | 25.46 | 23.17 | 22.64 | 21.82 | 24.21 | 18.79 | 21.11 |
| PLEKHG5  | 22.31 | 22.69 | 21.76 | 23.39 | 22.9  | 24.22 | 23.41 | 24.49 |
| ACAD9    | 25.49 | 23.7  | 23.84 | 21.84 | 22.39 | 24.24 | 21.35 | 23.6  |
| FAM213B  | 24.63 | 23.81 | 23.66 | 21.66 | 22.62 | 24.25 | 17.87 | 20.43 |
| HAUS4    | 23.64 | 22.65 | 24.2  | 20.01 | 24.45 | 24.28 | 21.1  | 22.94 |
| IKBK1    | 24.68 | 23.38 | 25.43 | 24.03 | 23.37 | 24.28 | 25.59 | 23.3  |
| JAK1     | 27.07 | 24.99 | 26.94 | 28.66 | 25.22 | 24.28 | 28.8  | 27.39 |
| PRMT6    | 22.18 | 22.88 | 23.52 | 23.56 | 23.46 | 24.29 | 21.69 | 22.42 |
| NCDN     | 21.93 | 21.84 | 20.63 | 21.04 | 21.93 | 24.31 | 19.51 | 21.29 |
| NEU1     | 23.73 | 25.73 | 23.76 | 21.37 | 24.77 | 24.31 | 20.85 | 23.18 |
| SYMPK    | 24.76 | 24.09 | 23.79 | 22.72 | 23.71 | 24.32 | 19.94 | 22.13 |
| USP19    | 24.68 | 24.61 | 23.54 | 23.23 | 22.77 | 24.32 | 21.24 | 22.14 |
| CYP2S1   | 24.38 | 26.94 | 23.62 | 22.45 | 23.3  | 24.32 | 20.18 | 24.23 |
| QRICH1   | 24.33 | 24.96 | 25.86 | 25.21 | 24.54 | 24.33 | 25.22 | 24.57 |
| RBM5     | 24.58 | 22.22 | 24.46 | 27.66 | 24.19 | 24.34 | 28.97 | 27.82 |
| G3BP2    | 25.56 | 22.07 | 26.17 | 27.34 | 24.79 | 24.35 | 31.9  | 29.53 |
| MRPL47   | 20.11 | 20.66 | 24.63 | 24.21 | 23.9  | 24.36 | 30.32 | 26.96 |
| PAK2     | 22.28 | 21.35 | 24.07 | 25.74 | 26.31 | 24.36 | 32.02 | 29.09 |
| BMP1     | 25.87 | 24.17 | 23.9  | 23.94 | 23.09 | 24.37 | 21.74 | 22.46 |
| WDR3     | 21.3  | 17.98 | 22.08 | 23.04 | 26.94 | 24.38 | 31.68 | 27.85 |
| BET1L    | 23.67 | 23.81 | 24.19 | 24.08 | 23.9  | 24.39 | 21.93 | 22.89 |
| BTBD1    | 20.83 | 19.96 | 20.93 | 23.17 | 24.58 | 24.4  | 31.46 | 27.44 |
| CPD      | 24.54 | 21.89 | 27.48 | 29.55 | 24.74 | 24.41 | 34.31 | 31.02 |
| SUGP1    | 24.56 | 26.86 | 25.29 | 23.79 | 26.26 | 24.42 | 25.12 | 24.41 |
| PXMP2    | 23.25 | 26.24 | 22.46 | 22.47 | 21.22 | 24.43 | 19.3  | 19.94 |
| TSEN54   | 23.07 | 24.83 | 24.04 | 23.03 | 24.48 | 24.43 | 21    | 23.26 |
| SPSB2    | 19.1  | 22.05 | 19    | 18.91 | 22.3  | 24.44 | 20.01 | 19.28 |
| FBXL16   | 22.86 | 21.53 | 22.28 | 21.15 | 22.43 | 24.44 | 17.68 | 20.05 |
| ITGA5    | 27.71 | 28.67 | 26.09 | 24.18 | 24.37 | 24.47 | 21.76 | 24.21 |
| SLC9A1   | 24.72 | 25.95 | 24.55 | 25.38 | 23.79 | 24.47 | 21.94 | 24.26 |
| PLXNB3   | 27.25 | 25.74 | 26.13 | 27.29 | 21.45 | 24.48 | 23.83 | 24.46 |
| DHRS3    | 28.48 | 29.55 | 27.53 | 24.22 | 24.24 | 24.49 | 18.83 | 20.67 |
| PMVK     | 28.44 | 27.17 | 25.67 | 23.49 | 27.52 | 24.49 | 21.98 | 21.16 |
| PEX19    | 25.21 | 24.7  | 24.49 | 24.38 | 26.39 | 24.49 | 26    | 25.09 |
| COL27A1  | 15.74 | 14.83 | 17.1  | 19.47 | 22.88 | 24.49 | 31.52 | 31.12 |
| HDAC6    | 22.19 | 21.98 | 21.84 | 21.24 | 22.8  | 24.5  | 21.93 | 21.06 |
| CCND3    | 27.47 | 27.95 | 26.8  | 24.45 | 24.56 | 24.51 | 18.84 | 20.49 |
| FBXO18   | 23.64 | 23.59 | 22.8  | 22.98 | 22.88 | 24.51 | 22.28 | 23.41 |
| MAPKAPK3 | 25.1  | 23.08 | 22.12 | 22.14 | 24.98 | 24.52 | 20.51 | 21.77 |
| HDAC5    | 27.45 | 26.38 | 26.66 | 24.07 | 24.47 | 24.53 | 19.39 | 21.63 |
| MRPL13   | 24.59 | 25.87 | 23.51 | 24.34 | 26.11 | 24.53 | 34.23 | 27.87 |
| SNX6     | 22.33 | 22.73 | 22.53 | 24.41 | 24.95 | 24.53 | 32.76 | 29.03 |
| PPOX     | 22.5  | 21.2  | 22.03 | 20.71 | 23.44 | 24.54 | 20.65 | 21.22 |
| ADPGK    | 25.72 | 23.97 | 24.35 | 26.1  | 26.81 | 24.54 | 26.73 | 26.28 |
| SPRED2   | 25.57 | 25.36 | 27.01 | 28.15 | 26.12 | 24.55 | 25.91 | 26.04 |
| PLK2     | 21.21 | 18.83 | 22.25 | 22.75 | 26.41 | 24.56 | 29.11 | 24.68 |
| EIF1B    | 23.99 | 23.38 | 23.33 | 23.64 | 26.07 | 24.56 | 25.97 | 25.02 |
| DARS2    | 19.52 | 20.03 | 20.26 | 21.09 | 25.62 | 24.56 | 28.51 | 26.64 |
| SNRPD3   | 23.72 | 23.46 | 23.75 | 25.24 | 24.08 | 24.57 | 27.34 | 27.35 |
| UBTD1    | 24.28 | 23.79 | 23.3  | 20.96 | 21.41 | 24.58 | 17.17 | 20.19 |
| VPS52    | 24.11 | 25.5  | 24.92 | 23.21 | 23.22 | 24.58 | 24.62 | 24.34 |
| C11orf73 | 22.3  | 25.1  | 22.93 | 21.81 | 26.43 | 24.58 | 27.47 | 26.19 |
| RBBP4    | 24.58 | 24.03 | 26.52 | 27.34 | 25.54 | 24.58 | 30.54 | 27.38 |
| MTFP1    | 28.85 | 27.4  | 27.24 | 24.3  | 25.91 | 24.59 | 20.19 | 21.26 |
| PSMG2    | 23.22 | 22.79 | 22.2  | 24.36 | 26.98 | 24.59 | 30.71 | 28.14 |
| ABCA7    | 22.73 | 23.07 | 21.77 | 22.44 | 21.33 | 24.61 | 19.74 | 22.78 |
| TPST1    | 24.72 | 26.16 | 24.8  | 26.19 | 25.24 | 24.62 | 25.36 | 25.32 |
| ARCN1    | 24.77 | 23.55 | 27.62 | 26    | 25.58 | 24.62 | 29.2  | 26.95 |
| HMG13    | 24.86 | 27.36 | 21.43 | 25.22 | 22.58 | 24.63 | 28.15 | 27.13 |

|           |       |       |       |       |       |       |       |       |
|-----------|-------|-------|-------|-------|-------|-------|-------|-------|
| TNPO1     | 20.7  | 18.92 | 22.91 | 25.87 | 24.87 | 24.63 | 37.33 | 32    |
| ARMC6     | 22.55 | 20.28 | 21.39 | 18.97 | 24.28 | 24.64 | 18.4  | 21.14 |
| FBXL19    | 22.67 | 22.75 | 22.16 | 21.06 | 23.45 | 24.64 | 18.15 | 22.83 |
| KCTD17    | 25.42 | 26.41 | 25.29 | 23.65 | 23.07 | 24.65 | 16.44 | 18.48 |
| YBEY      | 26.11 | 26.6  | 24.57 | 25.04 | 28.83 | 24.65 | 27.23 | 24.1  |
| TCEAL4    | 25.81 | 24.67 | 25.92 | 30.89 | 25.96 | 24.66 | 30.27 | 30.59 |
| GPN2      | 23.03 | 22.5  | 24.23 | 22.65 | 25.36 | 24.67 | 19.11 | 19.76 |
| VAMP5     | 25.95 | 27.44 | 27.37 | 25.64 | 22.32 | 24.67 | 22.4  | 21.52 |
| SDF2      | 24.69 | 26.46 | 26.67 | 22.94 | 23.92 | 24.67 | 23.59 | 22.33 |
| DDAH2     | 27.79 | 30.01 | 27.53 | 25.7  | 23.27 | 24.68 | 18.34 | 22.2  |
| C22orf23  | 20.69 | 20.6  | 21.89 | 20.04 | 26.35 | 24.68 | 22.96 | 24.54 |
| DEDD2     | 26.24 | 26.38 | 26.29 | 23.3  | 22.98 | 24.72 | 18.87 | 20.56 |
| PSMF1     | 24.43 | 24.06 | 23.6  | 23.44 | 24.33 | 24.73 | 20.38 | 22.63 |
| GCSH      | 23.75 | 21.73 | 21.66 | 22.11 | 26.2  | 24.73 | 30.74 | 26.2  |
| HPCAL1    | 25.23 | 26.31 | 23.74 | 23.14 | 23.19 | 24.74 | 19.44 | 21.9  |
| NFKB2     | 24.75 | 25.33 | 24.5  | 22.4  | 25.1  | 24.74 | 21.99 | 22.96 |
| NFS1      | 21.19 | 21.45 | 19.98 | 21.1  | 24.72 | 24.74 | 23.89 | 23.69 |
| PRICKLE3  | 25.76 | 25.82 | 25.44 | 23.21 | 23.93 | 24.77 | 19.71 | 21.11 |
| HS1BP3    | 24.08 | 25.78 | 24.44 | 22.3  | 25.41 | 24.79 | 19.16 | 20.27 |
| PPM1F     | 26.16 | 25.85 | 23.99 | 24.08 | 24.89 | 24.8  | 20.86 | 22.64 |
| KIFC2     | 18.94 | 20.1  | 18.17 | 19.78 | 22.67 | 24.8  | 25.91 | 23.9  |
| MGEA5     | 22.34 | 21.44 | 25.16 | 27.59 | 26.32 | 24.8  | 38.58 | 31.59 |
| DCTD      | 24.53 | 24.65 | 23.81 | 21.97 | 24.85 | 24.82 | 25.72 | 23.3  |
| SUMF1     | 22.38 | 22.2  | 23.55 | 23    | 24.76 | 24.82 | 24.11 | 25.14 |
| CCDC34    | 22.64 | 20.1  | 22.91 | 22.92 | 23.58 | 24.82 | 26.36 | 25.23 |
| PTDSS2    | 19.88 | 20.95 | 20.41 | 18.04 | 23.58 | 24.83 | 19.5  | 21.41 |
| FAM120AOS | 26.31 | 25.96 | 26.06 | 24.55 | 24.68 | 24.83 | 24.41 | 24.1  |
| PLGRKT    | 18.76 | 19.31 | 20.94 | 19.76 | 25.11 | 24.84 | 29.84 | 26.19 |
| C17orf49  | 25.91 | 23.21 | 24.91 | 23.71 | 23.58 | 24.85 | 20.91 | 20.5  |
| SNCG      | 35.45 | 33.59 | 33.6  | 30.68 | 23.64 | 24.85 | 20.06 | 21.27 |
| ARL16     | 24.6  | 25.48 | 25.3  | 25.8  | 24.96 | 24.86 | 26.25 | 25.09 |
| GATSL2    | 22.17 | 21.44 | 20.63 | 22.64 | 22.08 | 24.88 | 19.25 | 22.65 |
| RAD51C    | 23.23 | 19.57 | 23.33 | 23.5  | 26.95 | 24.89 | 32.59 | 28.89 |
| AP1G2     | 25.99 | 25.27 | 25.27 | 25.78 | 25.67 | 24.92 | 28.39 | 26.3  |
| PEX16     | 22.71 | 23.76 | 23.4  | 20.57 | 25.91 | 24.93 | 18.41 | 20.16 |
| FAM98C    | 25.2  | 24.81 | 24.09 | 22.24 | 26.32 | 24.98 | 17.93 | 18.24 |
| ST3GAL4   | 25.35 | 27.29 | 24.17 | 24.39 | 24.51 | 24.98 | 20.95 | 23.36 |
| NRSN2     | 28.87 | 31.23 | 29.71 | 26.94 | 26.68 | 24.98 | 22.1  | 24.79 |
| ALG12     | 22.85 | 22.68 | 23.31 | 22.96 | 23.06 | 24.99 | 19.34 | 20.56 |
| TRMT2A    | 22.17 | 22.07 | 21.6  | 20.1  | 23.73 | 24.99 | 20.81 | 20.89 |
| THAP11    | 24.98 | 23.97 | 24.07 | 22.47 | 24.41 | 24.99 | 20.67 | 22.01 |
| ARRDC1    | 24.26 | 24.1  | 21.62 | 19.28 | 25.48 | 25    | 19.59 | 21.21 |
| CDH13     | 26.71 | 25.69 | 28.26 | 27.54 | 24.53 | 25    | 28.04 | 27.16 |
| UBE4B     | 21.34 | 22.64 | 23.11 | 22.35 | 25.72 | 25.01 | 27.01 | 25.17 |
| GPR87     | 22.63 | 22.23 | 23.04 | 23.08 | 27.51 | 25.02 | 35.97 | 31.05 |
| CMTM3     | 28.02 | 27.14 | 27.34 | 26.55 | 24.55 | 25.07 | 22.57 | 24.64 |
| CLINT1    | 23.1  | 22.31 | 26.22 | 27.06 | 26.98 | 25.07 | 34.18 | 30.29 |
| TMEM115   | 23.88 | 25.09 | 23.61 | 21.65 | 23.55 | 25.08 | 20.05 | 22.54 |
| DHX38     | 23.13 | 22.2  | 22.34 | 20.72 | 26.89 | 25.09 | 22.96 | 25.58 |
| DEXI      | 22.71 | 22.2  | 22.86 | 21.6  | 23.32 | 25.1  | 20.23 | 21.52 |
| EMC6      | 23.34 | 20.93 | 21.01 | 19.52 | 24.7  | 25.13 | 18.3  | 19.13 |
| PSMD11    | 25.93 | 26.16 | 25.48 | 26.92 | 27.04 | 25.14 | 26.79 | 26.54 |
| BAZ2A     | 26.33 | 26.76 | 27.8  | 28.36 | 23.43 | 25.15 | 26.06 | 27.68 |
| TBC1D10A  | 27.39 | 27.52 | 25.48 | 24    | 22.3  | 25.16 | 18.86 | 20.47 |
| AK1       | 26.61 | 27.23 | 26.84 | 24.85 | 24.85 | 25.16 | 20.81 | 24.75 |
| CDC42BPB  | 24.08 | 24.29 | 25.08 | 24.33 | 25.11 | 25.17 | 24.75 | 25.98 |
| NUDT16L1  | 29    | 27.1  | 24.55 | 23.9  | 21.87 | 25.18 | 17.75 | 21.54 |
| CSNK2A2   | 23.49 | 22.29 | 23.58 | 21.84 | 25.05 | 25.19 | 27.12 | 24.29 |
| SRA1      | 26.57 | 25.03 | 25.03 | 23.92 | 25.56 | 25.2  | 21.26 | 21.92 |
| TSPAN9    | 32.62 | 33.55 | 31.43 | 29.97 | 25.36 | 25.2  | 22.29 | 23.3  |
| RAB40C    | 25.28 | 25.22 | 24.92 | 22.62 | 23.57 | 25.21 | 18.14 | 19.92 |
| ZGPAT     | 24.77 | 22.69 | 22.53 | 21.83 | 23.9  | 25.21 | 20.27 | 21.57 |
| CAV2      | 22.56 | 20.84 | 24.49 | 29.18 | 25.84 | 25.21 | 36.29 | 31.32 |
| TNIP2     | 21.61 | 22.82 | 21.94 | 21.93 | 24.59 | 25.25 | 20.72 | 21.76 |
| ACTR10    | 22.65 | 21.6  | 25.35 | 26.39 | 24.82 | 25.26 | 30.28 | 28.44 |
| GMPPA     | 28.04 | 27.07 | 27.44 | 26.3  | 25.8  | 25.27 | 22.56 | 20.87 |
| ACP2      | 24.72 | 26.68 | 24.84 | 24.63 | 22.9  | 25.28 | 19.65 | 21.55 |
| ALCAM     | 23.35 | 22.24 | 26.75 | 30.75 | 25.97 | 25.28 | 40.97 | 35.03 |
| GYS1      | 30.01 | 30.46 | 29.36 | 27.18 | 24.86 | 25.3  | 21.82 | 22.46 |
| TMEM123   | 25.73 | 26.71 | 27.96 | 33.68 | 26.56 | 25.31 | 41.83 | 37.29 |
| TBL2      | 26.75 | 26.11 | 24.89 | 24.6  | 25.77 | 25.32 | 23    | 24.09 |
| CRELD1    | 24.72 | 28.5  | 24.71 | 23.92 | 24.2  | 25.34 | 21.57 | 23.84 |
| AURKB     | 24.44 | 23.12 | 23.19 | 21.32 | 28.5  | 25.36 | 23.54 | 23.2  |
| RGS12     | 23.64 | 22.96 | 22.24 | 22.15 | 26.1  | 25.36 | 22.64 | 23.28 |
| NRAS      | 24.81 | 21.19 | 29.41 | 31.13 | 27.87 | 25.36 | 39.71 | 32.22 |
| SNX15     | 21.11 | 22.78 | 22.31 | 21.35 | 25.07 | 25.37 | 20.21 | 21.11 |
| ZNF511    | 21.76 | 22.3  | 21.09 | 18.96 | 22.07 | 25.38 | 17.22 | 18.59 |
| PLSCR1    | 45.13 | 43.7  | 46.09 | 48.28 | 27.84 | 25.38 | 33.57 | 26.38 |
| RGS10     | 24.7  | 25.46 | 22.83 | 23.97 | 25.3  | 25.41 | 26.05 | 26.12 |
| YY1AP1    | 27.06 | 28.8  | 27.06 | 27.25 | 26.64 | 25.41 | 28.49 | 28.15 |
| POLR1A    | 23.33 | 23.5  | 22.73 | 22.3  | 25.14 | 25.42 | 23.96 | 23.68 |
| MYBBP1A   | 20.68 | 21.05 | 19.66 | 19.75 | 25.69 | 25.45 | 21.51 | 23.1  |
| R3HCC1    | 26.91 | 26.76 | 26.05 | 26.64 | 23.81 | 25.46 | 20.55 | 23.01 |
| ICT1      | 24.32 | 28.6  | 24.31 | 24.9  | 24.36 | 25.47 | 23.45 | 23.99 |
| COL16A1   | 21.23 | 22.29 | 21.63 | 22.16 | 24.58 | 25.48 | 24.95 | 26.21 |



|          |       |       |       |       |       |       |       |       |
|----------|-------|-------|-------|-------|-------|-------|-------|-------|
| MTDH     | 22.14 | 20.99 | 23.07 | 27.26 | 25.48 | 25.48 | 32.56 | 30.15 |
| WRNIP1   | 26.47 | 24.43 | 24.2  | 24.43 | 24.01 | 25.49 | 21.74 | 22.6  |
| RIOK3    | 23.08 | 20.24 | 24.31 | 25.49 | 28.03 | 25.5  | 34.63 | 30.84 |
| PTPRK    | 23.47 | 23.02 | 26.08 | 27.35 | 25.24 | 25.51 | 30.98 | 28.21 |
| SEZ6L2   | 19.57 | 22.69 | 19.9  | 19.24 | 21.41 | 25.52 | 18.03 | 20.72 |
| RNF130   | 27.32 | 25.99 | 27.07 | 27.47 | 25.98 | 25.52 | 23.85 | 25.66 |
| HS3ST3B1 | 23.06 | 20.13 | 24.4  | 25.53 | 27.16 | 25.53 | 29.89 | 26.78 |
| PEX11B   | 26.4  | 25.47 | 26.37 | 26.06 | 26.53 | 25.54 | 25.24 | 25.15 |
| TMEM14A  | 22.79 | 26.16 | 26.9  | 26.83 | 26.49 | 25.54 | 29.75 | 26.55 |
| P3H3     | 34.05 | 35.1  | 31.75 | 29.47 | 23.76 | 25.56 | 20.42 | 22.02 |
| SLC35D2  | 25.85 | 25.98 | 25.55 | 25.58 | 27.67 | 25.57 | 27    | 26.34 |
| FEZ2     | 24.86 | 26.38 | 25.54 | 27.52 | 26.1  | 25.59 | 32.2  | 27.41 |
| ZNF217   | 25.28 | 23.09 | 26.9  | 30.68 | 26.9  | 25.59 | 35.69 | 32.11 |
| ZNF768   | 30.93 | 32.12 | 30.44 | 28.94 | 22.3  | 25.61 | 19.76 | 22.3  |
| RTCB     | 23.79 | 23.39 | 22.52 | 23.32 | 24.97 | 25.62 | 22.03 | 24.37 |
| BPNT1    | 24.08 | 23.56 | 23.13 | 23.55 | 25.54 | 25.63 | 28.4  | 26.7  |
| GPRC5C   | 26.91 | 28.42 | 25.2  | 23.14 | 23.41 | 25.65 | 19.7  | 21.3  |
| BLMH     | 24.44 | 24.05 | 26.18 | 24.04 | 25.44 | 25.65 | 26.28 | 25.59 |
| ZSCAN18  | 25.72 | 25.94 | 24.58 | 24.51 | 25.42 | 25.66 | 24.05 | 23.93 |
| ISCU     | 21.71 | 22.33 | 20.98 | 21.88 | 26.82 | 25.66 | 28.95 | 28.31 |
| ZNRF1    | 29.61 | 27.06 | 25.67 | 25.45 | 23.87 | 25.67 | 16.89 | 21.68 |
| VAV2     | 25.3  | 24.69 | 25.92 | 24.65 | 25.62 | 25.69 | 24.08 | 24.83 |
| RIN2     | 19.66 | 18.66 | 21.31 | 22.85 | 27    | 25.69 | 30.77 | 29.44 |
| RCE1     | 26.5  | 28.5  | 26.2  | 25.02 | 26.8  | 25.7  | 20.55 | 24.74 |
| SMIM4    | 22.11 | 23.92 | 20.13 | 22.15 | 24.83 | 25.72 | 16.7  | 20.19 |
| NDFIP1   | 24.11 | 24.57 | 24.36 | 25.58 | 25.63 | 25.73 | 27.33 | 25.95 |
| GOLGA2   | 25.89 | 26.4  | 27    | 27.55 | 26.92 | 25.74 | 26.12 | 26.7  |
| TSC2     | 23.68 | 24.34 | 23.2  | 21.31 | 23.51 | 25.75 | 20.68 | 22.27 |
| EGLN2    | 24.84 | 25.67 | 23.39 | 22.85 | 25.99 | 25.75 | 18.75 | 22.86 |
| TM9SF3   | 23.79 | 23    | 26.65 | 33.42 | 26.91 | 25.75 | 42.54 | 38.79 |
| NTHL1    | 23.8  | 24.27 | 19.52 | 20.38 | 23.94 | 25.76 | 20.17 | 17.02 |
| PIGU     | 25.7  | 25.99 | 25.02 | 26.37 | 26.16 | 25.76 | 26.63 | 28.15 |
| P4HA1    | 40.48 | 38.65 | 41.14 | 45.55 | 25.18 | 25.76 | 33.45 | 30.66 |
| ZNF512B  | 26.1  | 27.66 | 26.59 | 28.01 | 25.18 | 25.81 | 25.01 | 25.1  |
| MRPL32   | 22.06 | 21.25 | 21.59 | 24.03 | 27.78 | 25.81 | 31.21 | 29.92 |
| BAP1     | 25.04 | 26.77 | 25.57 | 24.81 | 26.95 | 25.82 | 22.23 | 24.07 |
| KDM5C    | 28.98 | 28.98 | 27.95 | 28.43 | 24.35 | 25.82 | 22.55 | 24.77 |
| CHMP3    | 22.22 | 22.2  | 24.25 | 24.02 | 27.1  | 25.82 | 29.06 | 26.96 |
| XPOT     | 20.77 | 20.46 | 23.94 | 25.75 | 28.14 | 25.82 | 36.09 | 31.72 |
| PCBD1    | 27.37 | 26.03 | 29.6  | 25.55 | 23.48 | 25.84 | 22.11 | 25.79 |
| SEC14L1  | 22.79 | 24.75 | 23.38 | 24.69 | 24.42 | 25.85 | 25.91 | 26.12 |
| SNW1     | 24.5  | 24.42 | 26.45 | 30.58 | 28.86 | 25.85 | 34.71 | 28.89 |
| ADCK2    | 28.9  | 28.25 | 26.4  | 26.31 | 23.5  | 25.86 | 20.23 | 20.61 |
| PLEKHM2  | 26.63 | 26.27 | 26.5  | 24.98 | 26.2  | 25.86 | 22.08 | 23.69 |
| MCM3     | 28.64 | 28.93 | 29.31 | 28.63 | 26.19 | 25.88 | 26.24 | 23.22 |
| GAK      | 23.97 | 24    | 23.36 | 22.42 | 23.56 | 25.89 | 20.98 | 21.57 |
| CITED2   | 29.22 | 27.33 | 28.5  | 26.14 | 24.02 | 25.9  | 21.2  | 21.84 |
| CBX6     | 28.64 | 29.87 | 28.17 | 26.34 | 24.42 | 25.9  | 20.53 | 23.78 |
| IPO5     | 22.07 | 20.81 | 22.58 | 22.3  | 27.13 | 25.9  | 30.3  | 25.9  |
| C11orf68 | 25.02 | 24.84 | 23.77 | 24.47 | 24.25 | 25.93 | 19.18 | 20.45 |
| TXLNA    | 26.96 | 28.97 | 26.94 | 25.76 | 26.61 | 25.93 | 24.65 | 25.45 |
| PSMA5    | 25.72 | 23.17 | 25.17 | 25.58 | 26.27 | 25.93 | 29.7  | 27.33 |
| DCBLD2   | 24.66 | 22.38 | 27.58 | 31.26 | 26.56 | 25.93 | 35.89 | 34.77 |
| RBM23    | 26.35 | 25.39 | 25.24 | 24.91 | 24.65 | 25.99 | 24.31 | 23.22 |
| PTN      | 31.57 | 34.09 | 32.84 | 37.97 | 23.85 | 26    | 31.84 | 29.46 |
| PLCH2    | 22.63 | 22.16 | 21.87 | 22.38 | 25.53 | 26.02 | 24.65 | 24.3  |
| GSPT1    | 24.14 | 23.01 | 24.98 | 24.97 | 26.04 | 26.02 | 30.32 | 28.35 |
| TRIM27   | 25.79 | 25.77 | 24.81 | 23.62 | 25.6  | 26.03 | 24.84 | 24.4  |
| FN3KRP   | 26.16 | 25.71 | 26.14 | 23.58 | 25.81 | 26.05 | 22.86 | 24.13 |
| LEMD2    | 26.14 | 25.28 | 26.19 | 23.8  | 25.68 | 26.05 | 22.5  | 24.56 |
| LAMB2    | 28.77 | 28.91 | 28.39 | 27.79 | 24.56 | 26.05 | 23.11 | 24.64 |
| LSM10    | 29.02 | 28.79 | 25    | 23.75 | 25.04 | 26.06 | 22.73 | 24.75 |
| GID8     | 25.58 | 25.77 | 25.14 | 24.84 | 25.88 | 26.06 | 26.06 | 25.91 |
| EML2     | 23.17 | 23.86 | 23.01 | 20.96 | 26.69 | 26.07 | 22.47 | 23.76 |
| STAMBP   | 26.27 | 25.66 | 25.76 | 26.21 | 28.6  | 26.07 | 32.8  | 28.09 |
| RAB6A    | 24.43 | 22.54 | 26.64 | 29.31 | 28.49 | 26.07 | 33.73 | 34.34 |
| KIFC1    | 24.78 | 22.73 | 24.48 | 22.62 | 27.1  | 26.08 | 24.45 | 23.13 |
| LMBR1    | 24.32 | 24.21 | 26.28 | 27.92 | 28.1  | 26.11 | 34.92 | 31.01 |
| TIPRL    | 25.09 | 22.51 | 22.49 | 25.17 | 25.63 | 26.14 | 27.83 | 27.53 |
| STARD3   | 23.19 | 24.24 | 22.54 | 22.86 | 26.34 | 26.15 | 20.98 | 24.25 |
| MVK      | 24.53 | 24.18 | 24.32 | 22.01 | 24.27 | 26.16 | 19.21 | 21.57 |
| GOLPH3   | 25.99 | 24.24 | 25.12 | 24.82 | 24.57 | 26.16 | 25.97 | 25.53 |
| AIDA     | 26.32 | 23.93 | 28.37 | 31.22 | 25.61 | 26.16 | 35.86 | 32.22 |
| PLPPR2   | 24.58 | 26.6  | 23.57 | 22.8  | 24.57 | 26.19 | 20.51 | 22.61 |
| COL12A1  | 26.88 | 26.1  | 28.64 | 32.35 | 24.42 | 26.19 | 32.73 | 33.27 |
| HTRA2    | 22.42 | 23.45 | 21.62 | 19.25 | 27.13 | 26.2  | 21.59 | 23.23 |
| ANKRD13B | 18.53 | 19.64 | 18.93 | 18.15 | 26.16 | 26.2  | 22.39 | 23.57 |
| APOPT1   | 22.5  | 22.37 | 23.44 | 22.8  | 24.65 | 26.21 | 26.62 | 25.41 |
| CCDC12   | 21.46 | 23.73 | 22.46 | 24.9  | 24.12 | 26.22 | 21.43 | 21.68 |
| PSMG3    | 26.66 | 28.18 | 25.87 | 25.58 | 26.43 | 26.22 | 21.6  | 25.69 |
| NFE2L3   | 29.97 | 27.53 | 31.1  | 30.87 | 28.12 | 26.26 | 32.46 | 28.06 |
| ZDHHC3   | 23.05 | 24.71 | 24.29 | 24.39 | 24.92 | 26.27 | 25.13 | 24.22 |
| BOD1     | 23.35 | 22.97 | 23.15 | 24.89 | 26.96 | 26.27 | 25.24 | 24.95 |
| ANAPC15  | 22.14 | 21.49 | 23.34 | 22.9  | 26.1  | 26.27 | 25.31 | 25.07 |
| FKBP4    | 27.66 | 27.51 | 24.43 | 24.71 | 27.24 | 26.29 | 24.44 | 25.22 |
| RNF11    | 25.44 | 23.82 | 26.73 | 30.07 | 27.85 | 26.29 | 34.22 | 31.71 |
| DCAF8    | 25.75 | 26.08 | 26.49 | 26.36 | 28.22 | 26.3  | 27.76 | 27.84 |

|         |       |       |       |       |       |       |       |       |
|---------|-------|-------|-------|-------|-------|-------|-------|-------|
| PPP6R2  | 27.57 | 27.95 | 26.93 | 26.04 | 25.95 | 26.31 | 22.93 | 22.71 |
| SKIV2L  | 25.42 | 26.21 | 24.22 | 23.29 | 25.33 | 26.32 | 22.94 | 23.05 |
| NOP14   | 25.32 | 23.38 | 23.23 | 23.8  | 28.25 | 26.32 | 26.1  | 26.39 |
| GRB10   | 25.42 | 25.59 | 26.24 | 24.92 | 26.61 | 26.32 | 27.05 | 27.69 |
| RRM2    | 31.44 | 28.24 | 31.05 | 29.45 | 27.53 | 26.33 | 28.06 | 23.88 |
| CENPH   | 24.99 | 23.18 | 24.14 | 23.59 | 28.5  | 26.33 | 29.93 | 26.13 |
| SEC11C  | 29.97 | 28.01 | 24.13 | 26.5  | 28.02 | 26.33 | 35.77 | 30.93 |
| PTRH2   | 24.28 | 21.84 | 25.71 | 27.23 | 31.59 | 26.34 | 32.89 | 32.29 |
| NFYC    | 27.89 | 27.08 | 28.02 | 27.88 | 26.69 | 26.35 | 25.25 | 24.17 |
| SCMH1   | 24.31 | 24.02 | 24.04 | 24.96 | 25.96 | 26.35 | 24.78 | 26.57 |
| KRT10   | 25.31 | 23.35 | 22.69 | 23.28 | 25.16 | 26.36 | 20.62 | 22.15 |
| CDK9    | 26.1  | 29.27 | 27.63 | 24.63 | 25.46 | 26.36 | 21.5  | 23.88 |
| CRCP    | 23.69 | 25.71 | 25.74 | 25.59 | 28    | 26.36 | 25.69 | 25.15 |
| TMEM243 | 21.59 | 22.13 | 25.81 | 24.61 | 28.21 | 26.38 | 34.42 | 29.19 |
| GOLM1   | 27.46 | 26.22 | 29.6  | 29.66 | 28.2  | 26.38 | 33.51 | 30.27 |
| TMEM69  | 23.61 | 23.84 | 26.17 | 27.68 | 29.42 | 26.38 | 35.65 | 31.18 |
| GTPBP6  | 23.92 | 23.76 | 22.37 | 21.52 | 23.73 | 26.39 | 18.79 | 23.4  |
| ZFAND3  | 28.17 | 28.88 | 27.92 | 27.38 | 27.06 | 26.39 | 24.54 | 24.99 |
| CASC3   | 24.57 | 25.26 | 25.56 | 24.24 | 27.54 | 26.4  | 29.14 | 28.53 |
| RMDN1   | 21.72 | 20.88 | 23.38 | 24.57 | 24.07 | 26.4  | 34.68 | 31.17 |
| ZNF444  | 27.86 | 27.14 | 26.31 | 24.95 | 24.31 | 26.41 | 20.42 | 22.73 |
| SFXN4   | 20.39 | 21.03 | 20.86 | 19.64 | 25.52 | 26.41 | 26.46 | 25.21 |
| ZNF787  | 30.09 | 29.58 | 26.79 | 26.35 | 23.89 | 26.43 | 18.95 | 18.64 |
| BCAS2   | 22.41 | 24.25 | 24.82 | 30.38 | 27.11 | 26.43 | 39.79 | 33.1  |
| PNKP    | 26.82 | 25.82 | 26.02 | 22.5  | 24.51 | 26.44 | 21.46 | 21.45 |
| MYO18A  | 26.75 | 26.56 | 24.89 | 25.04 | 26.34 | 26.45 | 22.36 | 25.53 |
| FOXM1   | 23.38 | 22.7  | 22.29 | 20.69 | 25.17 | 26.46 | 24.62 | 23.83 |
| MRPS18A | 27.73 | 32.69 | 29.84 | 23.77 | 25.83 | 26.46 | 22.2  | 23.96 |
| SAP30BP | 26.81 | 27.62 | 26.86 | 26.01 | 25.74 | 26.46 | 26.18 | 24.65 |
| PPP1R10 | 23.19 | 25.01 | 22.8  | 22.62 | 25.35 | 26.46 | 25.55 | 26.73 |
| LCMT1   | 26.37 | 23.67 | 23.83 | 25.09 | 30.2  | 26.47 | 25.13 | 25.22 |
| TUBG2   | 25.82 | 26.37 | 25.78 | 25.15 | 27.45 | 26.49 | 23.1  | 24.84 |
| EIF5    | 24.84 | 23.62 | 27.26 | 29.11 | 28.5  | 26.5  | 36.36 | 32.84 |
| CCDC130 | 26.91 | 23.56 | 24.15 | 25.33 | 23.79 | 26.52 | 25.06 | 26.96 |
| PTPA2   | 27.42 | 26.47 | 28.3  | 29.42 | 28.58 | 26.53 | 30.67 | 28.7  |
| TGFB1I1 | 25.52 | 25.33 | 24.06 | 22.36 | 23.54 | 26.54 | 21.03 | 21.76 |
| RAB35   | 24.99 | 26.02 | 24.47 | 23.25 | 24.99 | 26.54 | 21.19 | 23.4  |
| ADIPOR2 | 23.89 | 24.54 | 23.43 | 25    | 26.76 | 26.54 | 27.44 | 28.16 |
| GGCT    | 19.98 | 20.41 | 23.87 | 22.79 | 26.71 | 26.54 | 33.33 | 28.24 |
| NOP2    | 24.57 | 25.23 | 24.73 | 22.91 | 27.58 | 26.57 | 23.89 | 24.83 |
| HIP1R   | 24.08 | 23.99 | 23.51 | 21.99 | 25.42 | 26.58 | 21.84 | 23.11 |
| PEPD    | 23    | 23.03 | 20.56 | 21.05 | 24.2  | 26.59 | 19.25 | 23.12 |
| AKIP1   | 27.57 | 27.85 | 25.16 | 26.97 | 29.08 | 26.6  | 24.62 | 28.37 |
| TARS2   | 26.65 | 28.25 | 26.85 | 24.77 | 27.17 | 26.62 | 25.08 | 25.68 |
| MYLK    | 20.37 | 20.18 | 21.57 | 22.53 | 28.82 | 26.63 | 30.52 | 27.33 |
| CDCA4   | 27.17 | 26.27 | 25.98 | 25.02 | 24.78 | 26.64 | 21.03 | 21.76 |
| MCRS1   | 25.19 | 25.74 | 24.6  | 23.5  | 27.38 | 26.64 | 23.08 | 22.89 |
| NID1    | 34.05 | 34.85 | 35.36 | 36.65 | 26.06 | 26.64 | 26.55 | 28.07 |
| ZNHIT3  | 25.51 | 25.97 | 26.21 | 25.78 | 28.38 | 26.64 | 29.52 | 28.19 |
| PELP1   | 27.01 | 27.13 | 26.23 | 24.38 | 25.17 | 26.65 | 21.32 | 23.38 |
| CBWD1   | 21.13 | 18.47 | 21.92 | 28.84 | 26.65 | 26.67 | 33.9  | 31.49 |
| COA6    | 21.24 | 19.92 | 20.24 | 22.15 | 30.05 | 26.68 | 28.84 | 27.58 |
| PRR14   | 26.63 | 27.69 | 27.04 | 24.8  | 27.5  | 26.69 | 22.71 | 23.85 |
| ZFP64   | 23.48 | 24.24 | 21.51 | 22.19 | 25.81 | 26.69 | 25.37 | 25.46 |
| TIMP3   | 22.29 | 24.7  | 22.04 | 22.21 | 25.69 | 26.7  | 25.38 | 27.84 |
| RIPK4   | 28.45 | 26.92 | 28.31 | 25.6  | 25.41 | 26.71 | 21.59 | 23.87 |
| RAB10   | 25.31 | 25.23 | 26.84 | 28.21 | 26.71 | 26.73 | 30.99 | 29.65 |
| WTAP    | 26.84 | 26.16 | 27.11 | 31.37 | 28.43 | 26.73 | 34.31 | 31.8  |
| PDLIM2  | 28.99 | 28.1  | 27.1  | 23.96 | 26    | 26.74 | 19.18 | 20.32 |
| MFSD14A | 23.94 | 24.3  | 25.02 | 28.07 | 27.57 | 26.75 | 36    | 30.13 |
| SLC35E1 | 26.63 | 26.18 | 25.14 | 26.47 | 26.23 | 26.76 | 24.99 | 24.59 |
| MCM4    | 30.09 | 26.96 | 29.92 | 29.62 | 28.64 | 26.76 | 29.04 | 26.07 |
| TSC22D1 | 30.98 | 29.53 | 31.9  | 31.84 | 27.79 | 26.76 | 32.15 | 31.69 |
| MRPS33  | 26.84 | 26.94 | 25.69 | 23.62 | 31.62 | 26.77 | 29.34 | 29.76 |
| RAB4B   | 23.91 | 25.64 | 25.02 | 21.72 | 24.89 | 26.78 | 20.18 | 21.76 |
| GOLGA7  | 25.17 | 22.39 | 24.97 | 25.95 | 29.59 | 26.8  | 32.68 | 28.55 |
| CAMLG   | 21.16 | 19.42 | 22.45 | 21.38 | 28.28 | 26.81 | 29.22 | 26.54 |
| GNL2    | 25.62 | 22.74 | 28.29 | 32.51 | 30.38 | 26.81 | 38.04 | 35.46 |
| DPF2    | 26.32 | 27.86 | 27.16 | 26.13 | 25.19 | 26.83 | 22.67 | 24.1  |
| HNRNPH3 | 25.33 | 24.45 | 28.11 | 33.1  | 28.73 | 26.84 | 38.47 | 34.54 |
| HPRT1   | 26.18 | 28.38 | 30.21 | 29.88 | 29.73 | 26.87 | 34.94 | 30.64 |
| PICALM  | 26.24 | 24.25 | 28.1  | 31.83 | 28.35 | 26.87 | 40.08 | 35.69 |
| GLG1    | 27.4  | 30.55 | 29.02 | 29.58 | 27.54 | 26.88 | 28.24 | 29.96 |
| IGSF9   | 33.56 | 37.2  | 31.33 | 32.38 | 23.43 | 26.91 | 22.18 | 25.11 |
| ZMAT5   | 27    | 26.33 | 24.07 | 22.05 | 26.18 | 26.93 | 19.21 | 20.72 |
| FAM134C | 27.58 | 31.3  | 27.66 | 27.13 | 26.39 | 26.95 | 25.5  | 26.65 |
| LMNB1   | 31.35 | 28.65 | 32.08 | 31.25 | 29.67 | 26.96 | 33.61 | 27.57 |
| MICAL2  | 24.83 | 23.81 | 26.04 | 23.64 | 27.84 | 26.97 | 29.08 | 27.55 |
| NDUFS1  | 21.49 | 21.75 | 22.22 | 22.01 | 27.58 | 26.97 | 29.05 | 27.65 |
| NDUFA9  | 26.99 | 25.99 | 25.93 | 27.33 | 29.63 | 26.97 | 28.43 | 28.16 |
| SIRT6   | 27.95 | 26.4  | 24.68 | 23.32 | 26.22 | 26.98 | 18.01 | 21.74 |
| SYDE1   | 28.19 | 26.62 | 25.24 | 23.56 | 25.46 | 26.98 | 19.74 | 22.7  |
| NDUFC1  | 29.11 | 29.59 | 26.57 | 27.19 | 25.97 | 26.99 | 26.67 | 27.54 |
| INAFM2  | 22.81 | 23.32 | 22.83 | 22.53 | 26.66 | 27    | 24.37 | 24.07 |
| RABGGTB | 20.87 | 22.53 | 21.8  | 24.67 | 26.15 | 27.02 | 38.01 | 35.41 |
| PSMB8   | 32.46 | 31.39 | 28.66 | 32.31 | 28.77 | 27.03 | 26.62 | 22.23 |
| ASB13   | 24.73 | 26.06 | 25.22 | 23.33 | 25.78 | 27.04 | 21.79 | 23.96 |
| TAOK2   | 25.28 | 26.13 | 24.78 | 23.83 | 26.73 | 27.04 | 22.96 | 26.25 |

|                    |       |       |       |       |       |       |       |       |
|--------------------|-------|-------|-------|-------|-------|-------|-------|-------|
| OGT                | 22.27 | 21.26 | 24.18 | 30.76 | 25.94 | 27.04 | 42.18 | 34.89 |
| KIF2C              | 22.67 | 21.09 | 22.4  | 20.29 | 27.09 | 27.06 | 24.73 | 25.18 |
| DERL1              | 23.34 | 23.66 | 24.02 | 23.01 | 25.29 | 27.06 | 27.09 | 26.21 |
| MAPK1              | 25.48 | 26.47 | 25.69 | 28.61 | 29.7  | 27.07 | 31.56 | 29.42 |
| LPCAT4             | 27.39 | 27.81 | 26.28 | 27.07 | 25.41 | 27.11 | 24.58 | 26.83 |
| DYNC112            | 27.12 | 24.8  | 29.58 | 30.19 | 30.26 | 27.15 | 37.65 | 34.61 |
| SNAP47             | 29.06 | 27.82 | 26.99 | 25.52 | 27.98 | 27.17 | 23.74 | 26.06 |
| METTL21A           | 25.47 | 24.55 | 25.34 | 27.84 | 25.95 | 27.19 | 28.59 | 27.89 |
| CDC42EP3           | 27.67 | 26.27 | 29.35 | 31.08 | 26.61 | 27.2  | 33.29 | 31.02 |
| GPSM1              | 24.16 | 26.07 | 22.66 | 22.53 | 23.57 | 27.21 | 21.15 | 23.03 |
| CSTF1              | 26.7  | 26.19 | 27.7  | 27.65 | 28.37 | 27.21 | 30.22 | 27.07 |
| RPL36A-<br>HNRNPH2 | 22.75 | 23.2  | 26.49 | 31.33 | 26.12 | 27.21 | 37.9  | 37.76 |
| SPR                | 24.04 | 26.92 | 22.85 | 21.18 | 26.07 | 27.22 | 21.73 | 23.19 |
| DENR               | 26.23 | 23.37 | 27.79 | 29.77 | 29.09 | 27.22 | 36.49 | 31.78 |
| FEN1               | 28.71 | 27.94 | 28.96 | 27.03 | 28.36 | 27.24 | 28    | 25.59 |
| ERAL1              | 30.08 | 30.73 | 30.61 | 28.46 | 28.7  | 27.25 | 24.74 | 27.6  |
| STX4               | 24.23 | 22.74 | 24.37 | 23.81 | 27.05 | 27.28 | 27.55 | 23.78 |
| UBL4A              | 25.8  | 26.07 | 24.87 | 23.89 | 27.73 | 27.28 | 23.19 | 24.86 |
| KIF3B              | 25.14 | 24.24 | 25.92 | 27.19 | 27.54 | 27.28 | 30.2  | 29    |
| SCAMP2             | 28.69 | 30.2  | 29    | 28.88 | 26.81 | 27.29 | 26.28 | 26.39 |
| SNRPB2             | 27.16 | 26.15 | 30.47 | 29.35 | 29.34 | 27.29 | 37.31 | 34.26 |
| CCNK               | 28.96 | 29.6  | 28.8  | 28.85 | 28.67 | 27.3  | 27.51 | 29.23 |
| CCDC24             | 21.73 | 20.89 | 21.42 | 19.28 | 24.77 | 27.33 | 24.62 | 23.1  |
| GPX2               | 28.69 | 31.92 | 27.11 | 27.74 | 25.91 | 27.33 | 21.55 | 27.24 |
| SYVN1              | 27.35 | 26.85 | 25.68 | 25.5  | 27.84 | 27.36 | 24.46 | 26.04 |
| SSBP3              | 31.78 | 35.07 | 31.38 | 31.03 | 28.91 | 27.36 | 27.51 | 29.7  |
| PCBP4              | 21.08 | 21.43 | 20.51 | 18.76 | 26.3  | 27.37 | 21.75 | 22.45 |
| PAQR4              | 27.79 | 29.84 | 28.24 | 26.27 | 26.26 | 27.37 | 20.26 | 23.55 |
| SNX12              | 27.95 | 28.74 | 27.82 | 25.8  | 29.35 | 27.37 | 26.84 | 26.33 |
| PAGE5              | 25.51 | 23.15 | 20.46 | 19.32 | 26.55 | 27.38 | 21.36 | 22.64 |
| PROSC              | 27.41 | 26.58 | 28.49 | 28.8  | 28.53 | 27.41 | 30.64 | 29.54 |
| ST5                | 26.26 | 27.48 | 26.82 | 26.88 | 24.8  | 27.43 | 24    | 25.81 |
| PGRMC1             | 27.09 | 24.07 | 27.02 | 29.53 | 27.78 | 27.44 | 32.08 | 29.34 |
| RPS6KB2            | 25.78 | 25.97 | 26.58 | 24.37 | 29.2  | 27.45 | 22.21 | 21.99 |
| PCIF1              | 29.39 | 29.41 | 28.36 | 27.21 | 27.73 | 27.45 | 22.42 | 24.88 |
| FAM192A            | 26.8  | 27.72 | 26.82 | 27.28 | 28.98 | 27.46 | 30.54 | 28.39 |
| ANKRD9             | 25.95 | 26.01 | 25.72 | 23.08 | 25.87 | 27.47 | 17.96 | 21.24 |
| GSTZ1              | 25.28 | 26.83 | 24.65 | 23.18 | 29.47 | 27.47 | 22.45 | 25.21 |
| OSTF1              | 24.66 | 26    | 27.6  | 29.86 | 30.11 | 27.47 | 30.25 | 30.81 |
| DNAAF5             | 25.44 | 24.94 | 24.04 | 22.75 | 27.05 | 27.5  | 22.16 | 24.14 |
| PRKAB1             | 20.89 | 23.53 | 21.89 | 20.3  | 25.68 | 27.53 | 23.95 | 24.47 |
| NTAN1              | 22.78 | 25.09 | 23.75 | 21.5  | 27.25 | 27.54 | 27.14 | 26.27 |
| UTP11              | 28.14 | 24.35 | 27.3  | 30.16 | 28.96 | 27.59 | 34.3  | 28.62 |
| CHCHD1             | 27.02 | 27.05 | 25.03 | 26.97 | 26.53 | 27.61 | 25.34 | 28.54 |
| DUSP14             | 21.89 | 20.29 | 20.64 | 20.64 | 29.39 | 27.62 | 26.79 | 26.11 |
| GAS6               | 34.09 | 32.6  | 31.06 | 28.78 | 25.97 | 27.63 | 20.91 | 23.62 |
| MAEA               | 25.52 | 25.66 | 24.51 | 23.39 | 27.49 | 27.63 | 24.19 | 25.19 |
| STK24              | 28.91 | 30.68 | 28.72 | 28.25 | 29.14 | 27.63 | 28.64 | 27.95 |
| PTPN14             | 26.57 | 25.15 | 27.38 | 29.03 | 27.93 | 27.63 | 32.01 | 30.02 |
| GALNT11            | 26.3  | 26.55 | 26.07 | 28.47 | 30.33 | 27.63 | 32.03 | 31.14 |
| SNAPC2             | 27.77 | 29.13 | 27.27 | 24.63 | 26.5  | 27.64 | 17.41 | 21.71 |
| WDR26              | 25.24 | 24.21 | 27.33 | 30.04 | 27.26 | 27.64 | 38.56 | 33.91 |
| ACTR1B             | 27.13 | 29.54 | 28.04 | 26.21 | 24.62 | 27.65 | 21.9  | 24.58 |
| BNIP3L             | 30.74 | 29.65 | 35.2  | 37.95 | 27.54 | 27.65 | 40.61 | 34.3  |
| ATPAF1             | 23.94 | 24.18 | 23.57 | 24.74 | 23.88 | 27.66 | 25.06 | 25.09 |
| SERINC1            | 23.97 | 21.67 | 28.81 | 34.94 | 27.87 | 27.66 | 49.31 | 38.97 |
| XPNPEP1            | 28.08 | 28.08 | 27.65 | 27.06 | 28.71 | 27.67 | 27.1  | 26.22 |
| PTPN12             | 28.3  | 26.95 | 30.8  | 34.91 | 29.18 | 27.67 | 44.75 | 39.57 |
| PNRC2              | 26.75 | 26.39 | 29.49 | 34.14 | 28.28 | 27.67 | 44.57 | 40.21 |
| ORAI2              | 28.24 | 28.76 | 27.31 | 26.58 | 26.38 | 27.68 | 23.55 | 26.37 |
| HSD17B7            | 24.3  | 23.49 | 23.53 | 24.03 | 27.54 | 27.69 | 33.39 | 30.59 |
| CAPZA2             | 28.16 | 29.55 | 27.53 | 28.47 | 28.78 | 27.7  | 41.83 | 35.86 |
| NDRG1              | 46.84 | 41.09 | 43.67 | 39.33 | 25.67 | 27.71 | 28.38 | 25.43 |
| KIRREL             | 30.35 | 29.62 | 28.38 | 30.66 | 26.54 | 27.72 | 26.66 | 27.24 |
| PYGL               | 27.87 | 28.42 | 28.01 | 28.04 | 28.9  | 27.72 | 31.17 | 29.38 |
| POMZP3             | 23.63 | 24.68 | 24.39 | 21.92 | 23.55 | 27.73 | 18.35 | 22.42 |
| PPP1R12C           | 25.99 | 25.93 | 24.16 | 23.55 | 27.44 | 27.74 | 22.73 | 25.03 |
| HS6ST2             | 25.16 | 24.42 | 25.73 | 30.51 | 27.56 | 27.74 | 37.66 | 35.66 |
| URI1               | 23.77 | 22.4  | 25.33 | 26.05 | 27.65 | 27.75 | 34.19 | 32.5  |
| APTX               | 23.59 | 25.16 | 26.16 | 25.47 | 29.06 | 27.76 | 27.25 | 27.62 |
| MGST1              | 24.89 | 25.28 | 23.76 | 25.94 | 28.02 | 27.78 | 32.76 | 30.31 |
| CETN2              | 28.32 | 30.96 | 32.38 | 29.85 | 28.26 | 27.8  | 32.02 | 28    |
| C9orf69            | 26.36 | 25.23 | 25.66 | 23.45 | 26.4  | 27.81 | 20.86 | 22.2  |
| UQCC1              | 25.34 | 26.29 | 25.3  | 24.6  | 27.95 | 27.82 | 26.5  | 27.93 |
| TAX1BP1            | 23.42 | 23.96 | 27.6  | 28.65 | 27.15 | 27.82 | 40.73 | 37.07 |
| NFKBIA             | 32.03 | 31.97 | 30.79 | 29.61 | 28.09 | 27.83 | 27.18 | 25.56 |
| CD82               | 27.93 | 28.79 | 26.52 | 26.49 | 26.67 | 27.85 | 22.37 | 23.72 |
| ZNF219             | 25.58 | 23.67 | 23.52 | 22.57 | 27.01 | 27.87 | 19.51 | 21.92 |
| NPEPL1             | 29.21 | 28.05 | 26.94 | 25.79 | 25.6  | 27.88 | 24.11 | 25.35 |
| MEN1               | 25.96 | 28.11 | 24.32 | 23.61 | 25.84 | 27.88 | 22.41 | 25.38 |
| CRIM1              | 24.76 | 21.97 | 26.51 | 30    | 29.47 | 27.88 | 35.71 | 31.04 |
| NDUFC2             | 26.78 | 26.94 | 25.67 | 25.75 | 26.42 | 27.89 | 25.56 | 23.97 |
| RTN3               | 30.18 | 31.02 | 30.66 | 29.66 | 29.82 | 27.89 | 32.58 | 32.01 |
| ATXN10             | 25.67 | 26.2  | 26.78 | 27.77 | 29.05 | 27.91 | 33.56 | 29.98 |
| ATP5SL             | 28.48 | 28.66 | 27.06 | 26.83 | 29.64 | 27.93 | 22.78 | 24.89 |

|               |       |       |       |       |       |       |       |       |
|---------------|-------|-------|-------|-------|-------|-------|-------|-------|
| EMC3          | 26.16 | 26.71 | 23.83 | 26.21 | 29.27 | 27.94 | 30.31 | 25.87 |
| EXOSC1        | 26.37 | 26.13 | 26.59 | 27.91 | 28.26 | 27.94 | 30.73 | 29.23 |
| WWTR1         | 28.95 | 26.65 | 31.59 | 33.83 | 29.27 | 27.94 | 35.18 | 31.88 |
| SPSB3         | 24.87 | 25.05 | 25.92 | 24.52 | 24.69 | 27.95 | 24.8  | 22.31 |
| BSDC1         | 29.13 | 27.84 | 27.63 | 29.34 | 29.05 | 27.96 | 29.94 | 30.27 |
| DDX19B        | 27.25 | 27.23 | 28.57 | 27.5  | 28.31 | 27.97 | 26.72 | 27.22 |
| FAM65A        | 26.9  | 28.64 | 26.14 | 25.2  | 26.85 | 27.98 | 22.64 | 25.48 |
| RNF4          | 28.3  | 28.56 | 27.87 | 27.73 | 28.17 | 27.98 | 26.19 | 28.17 |
| RIC3          | 23.01 | 21.21 | 27.39 | 36.98 | 26.1  | 27.98 | 59.27 | 48.77 |
| SYNGR1        | 27.62 | 29.55 | 29.68 | 26.56 | 26.78 | 28.04 | 21.88 | 23.8  |
| MALSU1        | 26.57 | 26.67 | 25.31 | 29.66 | 28.07 | 28.07 | 28.24 | 27.96 |
| CPSF7         | 28.45 | 28.65 | 28.88 | 29.39 | 30.01 | 28.08 | 31.02 | 30.6  |
| BTG2          | 21.95 | 22.1  | 22.64 | 21.85 | 31.3  | 28.09 | 28.87 | 29.74 |
| MGST2         | 26.17 | 29.38 | 28.08 | 25.51 | 27.29 | 28.12 | 29.53 | 26.59 |
| C7orf73       | 28.41 | 29.51 | 31.5  | 30.12 | 31.19 | 28.12 | 33.12 | 31.08 |
| GPS2          | 31.7  | 30.98 | 30.18 | 28.99 | 30.98 | 28.13 | 26.49 | 27.82 |
| FBXO32        | 26.2  | 24.64 | 26.94 | 27.33 | 30.78 | 28.13 | 32.92 | 29.69 |
| PPP1R7        | 27.03 | 30.99 | 26.48 | 26.77 | 25.37 | 28.15 | 25.69 | 26.85 |
| EIF2B2        | 28.16 | 29.24 | 26.58 | 26.06 | 28.24 | 28.16 | 25.53 | 27.25 |
| RBM10         | 31.81 | 32.15 | 32.82 | 31.35 | 30.21 | 28.17 | 26.16 | 27.51 |
| PSMB10        | 30.03 | 26.88 | 24.58 | 23.21 | 25.94 | 28.18 | 21.54 | 21.35 |
| RBM34         | 23.09 | 27.41 | 26.62 | 27.68 | 28.53 | 28.19 | 35.44 | 30.63 |
| OLA1          | 25.36 | 24.22 | 27.41 | 27.87 | 30.85 | 28.19 | 37.61 | 31.98 |
| C6orf106      | 26.88 | 28.43 | 27.19 | 26.05 | 27.24 | 28.2  | 25.23 | 25.92 |
| GNG12         | 26.61 | 24.53 | 29.66 | 31.78 | 32.23 | 28.23 | 42.46 | 36.51 |
| BAK1          | 26.69 | 28.26 | 24.92 | 25.39 | 27.14 | 28.24 | 21.73 | 23.56 |
| IDI1          | 23.22 | 23.45 | 23.15 | 27.8  | 27.78 | 28.24 | 39.05 | 34.94 |
| MSTO1         | 24.74 | 25.94 | 25.36 | 25    | 28.65 | 28.25 | 26.23 | 26    |
| SAMD1         | 32.41 | 29.41 | 30.05 | 26.97 | 25.62 | 28.27 | 19.94 | 21.62 |
| HEXIM1        | 30.06 | 30.2  | 32.01 | 30.78 | 28.74 | 28.3  | 28.32 | 27.31 |
| IKBKG         | 28.79 | 26.67 | 25.77 | 25.92 | 26.62 | 28.31 | 21.89 | 23.89 |
| MICA          | 25.15 | 28.71 | 24.94 | 23.84 | 27.79 | 28.31 | 27.44 | 27.67 |
| ZMIZ2         | 27.45 | 26.96 | 27.06 | 26.86 | 27.86 | 28.35 | 25.81 | 25.86 |
| XPC           | 23.99 | 23.71 | 24.89 | 24.21 | 30.38 | 28.35 | 29.56 | 28.39 |
| CY5B          | 30.5  | 29.7  | 29.53 | 28.59 | 29.69 | 28.35 | 30.39 | 29.18 |
| SEC16A        | 27.8  | 27.52 | 27.21 | 27    | 25.56 | 28.36 | 25.34 | 27.09 |
| PSMD10        | 28.28 | 28.79 | 27.77 | 30.2  | 30.38 | 28.36 | 33.45 | 28.89 |
| ASPSCR1       | 29.1  | 28.5  | 26.4  | 24.77 | 28.74 | 28.37 | 21.98 | 22.64 |
| DMAP1         | 24.98 | 25.15 | 25.28 | 24.56 | 27.83 | 28.37 | 24.97 | 25.1  |
| PNRC1         | 30.44 | 29.99 | 30.91 | 30.06 | 28.39 | 28.37 | 29.04 | 27.63 |
| NPRL3         | 26.82 | 25.49 | 24.08 | 22.55 | 26.48 | 28.38 | 21.32 | 24.56 |
| FAM53B        | 28.77 | 29.05 | 29.2  | 26.62 | 27.39 | 28.39 | 22.7  | 24.73 |
| AAAS          | 33.1  | 32.96 | 30.78 | 29.49 | 29.96 | 28.39 | 24.67 | 26.05 |
| SSFA2         | 18.71 | 18.6  | 21.97 | 24.31 | 28.22 | 28.4  | 44.23 | 37.18 |
| TRIM11        | 26.08 | 27.44 | 25.91 | 25.18 | 26.19 | 28.41 | 21.94 | 23.65 |
| ATG4B         | 24.87 | 26.78 | 23.54 | 23.93 | 25.73 | 28.42 | 22.36 | 25.41 |
| NPC1          | 24.94 | 26.84 | 25.86 | 26.61 | 27.68 | 28.44 | 29.13 | 29.01 |
| PUM1          | 30.17 | 28.15 | 32.16 | 32.9  | 30.24 | 28.44 | 33.73 | 33.26 |
| GALK1         | 30.44 | 28.66 | 27.06 | 23.57 | 26.66 | 28.45 | 21.41 | 20.87 |
| STX6          | 28.53 | 26.63 | 29.97 | 30.87 | 28.51 | 28.45 | 31.89 | 29.95 |
| CCDC137       | 25.5  | 26    | 26.28 | 25.68 | 29.24 | 28.48 | 26.4  | 27.84 |
| SPRY1         | 31.05 | 31.79 | 32.94 | 33.54 | 27.82 | 28.5  | 28.37 | 31.18 |
| KTN1          | 23.42 | 22.33 | 25.84 | 30.92 | 28.36 | 28.51 | 46.8  | 41.36 |
| MRPS30        | 23.1  | 22.84 | 23.36 | 23.9  | 25.47 | 28.52 | 28.68 | 28.31 |
| HERPUD1       | 29.78 | 31.17 | 30.27 | 30.21 | 29.21 | 28.54 | 29.1  | 30.02 |
| ZMYND19       | 26.81 | 25.65 | 22.61 | 23.65 | 27.75 | 28.55 | 22.87 | 23.55 |
| TACO1         | 28.05 | 29.18 | 27.12 | 26.82 | 29.23 | 28.57 | 26.21 | 26.21 |
| OSBPL9        | 25.79 | 23.64 | 30.05 | 33.18 | 27.36 | 28.57 | 43.12 | 36.06 |
| PMF1          | 31.07 | 30.44 | 30.69 | 28.49 | 28.56 | 28.58 | 27.94 | 23.87 |
| BIRC5         | 25.94 | 24.17 | 24.15 | 22.36 | 28.92 | 28.58 | 24.42 | 25.56 |
| STRADA        | 28.4  | 28.31 | 27.45 | 28.15 | 27.1  | 28.6  | 30.36 | 29.03 |
| RNPEPL1       | 29.72 | 30.98 | 28.94 | 27.7  | 25.44 | 28.64 | 21.19 | 23.21 |
| GNA12         | 26.63 | 29.34 | 27.55 | 25.8  | 27.37 | 28.64 | 25.95 | 26.31 |
| PQLC1         | 28.59 | 29.5  | 27.43 | 25.35 | 26.82 | 28.65 | 20.28 | 22.07 |
| UBALD1        | 28.96 | 28.17 | 24.73 | 25.69 | 27.98 | 28.65 | 21.69 | 23.85 |
| ADCK3         | 23.04 | 22.94 | 23.08 | 20.09 | 30.06 | 28.66 | 25.67 | 25.11 |
| EMP3          | 35.93 | 32.73 | 32.89 | 33.93 | 24.92 | 28.67 | 21.81 | 26.41 |
| DLGAP4        | 29.16 | 28.64 | 29.61 | 28.26 | 28.97 | 28.67 | 26.52 | 27.24 |
| BCL2L2-PABPN1 | 31.91 | 35.78 | 33.4  | 35.08 | 32.87 | 28.67 | 36.45 | 36.35 |
| MAPK12        | 24.67 | 25.23 | 24.35 | 23.05 | 26.06 | 28.69 | 25.46 | 25.93 |
| C1orf35       | 32.31 | 29.18 | 28.57 | 28.63 | 27.44 | 28.71 | 21.83 | 25.13 |
| CTSL          | 27.26 | 25.83 | 26.69 | 29.44 | 27.75 | 28.71 | 30.12 | 29.72 |
| NUB1          | 28.5  | 27.73 | 30.34 | 29.37 | 31.73 | 28.72 | 33.66 | 31.43 |
| COPS5         | 24.26 | 24.13 | 26.78 | 28.26 | 28.84 | 28.73 | 33.23 | 28.81 |
| SCARB2        | 28.75 | 27.23 | 30.73 | 33.84 | 29.5  | 28.74 | 38.53 | 35.09 |
| FAM3A         | 26.76 | 25.65 | 24.76 | 24.09 | 27.21 | 28.75 | 21.32 | 25.63 |
| TPRA1         | 30.61 | 30.34 | 30.17 | 28.28 | 29.35 | 28.77 | 23.47 | 24.49 |
| NDUFB3        | 27.22 | 29.21 | 28.19 | 27.56 | 30.16 | 28.77 | 37.21 | 32.58 |
| STC1          | 35.97 | 32.79 | 36.99 | 39.71 | 26.4  | 28.77 | 35.86 | 34.69 |
| ZNF598        | 24.4  | 23.5  | 24.56 | 22.69 | 26.49 | 28.78 | 22.6  | 24.26 |
| PGAM5         | 26.9  | 27.73 | 25.58 | 24.1  | 28.15 | 28.8  | 22.02 | 25.08 |
| TGOLN2        | 28.49 | 27.87 | 31.02 | 31.63 | 29.22 | 28.81 | 34.23 | 31.07 |
| TMEM63A       | 27.65 | 29.03 | 28.92 | 29.31 | 27.62 | 28.81 | 29.61 | 31.81 |
| RYK           | 27.31 | 24.99 | 28.15 | 31.29 | 30.95 | 28.82 | 37.8  | 32.94 |
| OAT           | 23.54 | 24.05 | 25.23 | 27.86 | 30.48 | 28.83 | 37.92 | 35.18 |
| PAPOLA        | 25.62 | 23.15 | 29.98 | 33.02 | 31.04 | 28.83 | 46.3  | 40.65 |
| TMPO          | 26.12 | 24.2  | 28.63 | 29.31 | 29.79 | 28.84 | 35.1  | 30.87 |

|          |       |       |       |       |       |       |       |       |
|----------|-------|-------|-------|-------|-------|-------|-------|-------|
| C16orf74 | 28.25 | 29.45 | 26.05 | 24.51 | 27.9  | 28.86 | 21.22 | 24.08 |
| NUP98    | 28    | 28.23 | 27.72 | 27.98 | 28.79 | 28.86 | 31.02 | 29.86 |
| SURF2    | 27.08 | 27.82 | 26.05 | 23.66 | 27.86 | 28.88 | 22.1  | 24.76 |
| PDCD2    | 28.28 | 25.25 | 26.65 | 25.58 | 29.6  | 28.89 | 28.1  | 28.4  |
| TACC3    | 27.49 | 25.33 | 25.55 | 24.5  | 29.77 | 28.9  | 26.4  | 27.67 |
| RAB8A    | 29.41 | 30.78 | 30.71 | 30.9  | 32.17 | 28.92 | 32.08 | 31.34 |
| TSPAN13  | 30.62 | 28.63 | 31.81 | 35.12 | 28.76 | 28.92 | 35.01 | 33.71 |
| CPTP     | 28.57 | 29.39 | 26.17 | 24.95 | 26.18 | 28.93 | 21.81 | 24.05 |
| HAGH     | 25.55 | 26.12 | 22.11 | 23.56 | 26.62 | 28.93 | 22.35 | 24.89 |
| PRCP     | 31.81 | 31.17 | 30.18 | 30.68 | 30.4  | 28.95 | 31.25 | 29.99 |
| PSAT1    | 28.06 | 27.27 | 29.31 | 28.92 | 28.53 | 28.96 | 34.35 | 29.77 |
| ABHD11   | 29.1  | 30.81 | 30.8  | 27.46 | 29.7  | 28.97 | 24.81 | 28.64 |
| DARS     | 29.35 | 27.92 | 31.47 | 33.67 | 31.28 | 29.01 | 40.93 | 35.21 |
| RBM8A    | 29.33 | 29.14 | 31.87 | 32.31 | 31.86 | 29.03 | 33.02 | 29.96 |
| CUL1     | 28.37 | 27.09 | 30.75 | 32.45 | 29.02 | 29.03 | 34.52 | 32.83 |
| RDH11    | 27.66 | 29.45 | 28.22 | 29.71 | 32.28 | 29.04 | 35.33 | 32.86 |
| SCP2     | 28.2  | 27.98 | 29.82 | 31.81 | 31.9  | 29.06 | 43.73 | 38.81 |
| RPUSD3   | 28.06 | 28.89 | 27.04 | 24.63 | 27.71 | 29.09 | 24.65 | 27.58 |
| UBAC1    | 25.8  | 25.41 | 25.67 | 23.72 | 26.95 | 29.1  | 22.21 | 24.8  |
| DNAJA3   | 25.34 | 26.45 | 24.72 | 23.66 | 29.66 | 29.1  | 26.33 | 26.06 |
| ARFGAP2  | 30.88 | 31.57 | 28.8  | 29.35 | 28.84 | 29.11 | 26.19 | 26.17 |
| ABCG1    | 19.22 | 23.45 | 19.77 | 22.02 | 28.6  | 29.12 | 27.26 | 29.94 |
| GHDC     | 28.67 | 29.1  | 28.76 | 27.02 | 27.71 | 29.13 | 24.51 | 24.63 |
| ARF6     | 29.92 | 28.91 | 31.96 | 32.33 | 27.86 | 29.13 | 30.93 | 31    |
| ADNP     | 29.01 | 28.61 | 31.42 | 31.65 | 29.13 | 29.13 | 34.86 | 31.81 |
| FLYWCH2  | 32.8  | 33.34 | 31.58 | 28.53 | 26.58 | 29.15 | 22.7  | 24.82 |
| MLLT6    | 30.51 | 29.78 | 29.03 | 29.18 | 26.86 | 29.18 | 26.49 | 28.17 |
| AFG3L2   | 23.75 | 27.27 | 24.24 | 25.77 | 31.8  | 29.18 | 31.52 | 29.87 |
| A4GALT   | 32.65 | 34.32 | 30.91 | 29.28 | 28.64 | 29.2  | 23.58 | 25.62 |
| PPME1    | 35.99 | 35.62 | 34.36 | 34.37 | 30.16 | 29.2  | 29.41 | 27.75 |
| CD55     | 27.22 | 25.02 | 27.32 | 31.23 | 30.01 | 29.2  | 37.61 | 31.01 |
| API5     | 27.4  | 23.95 | 30.66 | 32.06 | 29.84 | 29.22 | 39.85 | 33.57 |
| CCDC106  | 31.9  | 33.73 | 30.1  | 26.66 | 27.43 | 29.23 | 20.61 | 25.14 |
| STX5     | 31.49 | 31.58 | 29.27 | 29.97 | 28.75 | 29.23 | 25.09 | 28.68 |
| ORMDL3   | 30.1  | 30.06 | 30.77 | 29.24 | 29.82 | 29.27 | 24.59 | 28.78 |
| AKAP8L   | 29    | 28.68 | 29.79 | 27.68 | 30.65 | 29.28 | 26.98 | 27.27 |
| BOLA3    | 29.14 | 29.25 | 31.28 | 30.96 | 27.85 | 29.3  | 28.67 | 28.74 |
| NPEPPS   | 27.73 | 28.96 | 30.44 | 29.77 | 29.54 | 29.31 | 33.52 | 31.91 |
| ERLIN2   | 30.56 | 27.87 | 30.47 | 32.06 | 33.11 | 29.31 | 34.5  | 32.49 |
| GUCD1    | 25.53 | 26.51 | 25.91 | 24.58 | 27.01 | 29.4  | 25.02 | 25.94 |
| SUGP2    | 25.78 | 23.91 | 26.09 | 29.32 | 30.37 | 29.45 | 38.14 | 33.23 |
| SMARCD3  | 30.23 | 27.82 | 28.7  | 27.9  | 29.61 | 29.46 | 23.35 | 26.97 |
| UBR4     | 26.32 | 26.14 | 27.25 | 27.5  | 29.26 | 29.47 | 30.33 | 30.17 |
| TPM1     | 30.87 | 28.69 | 31.47 | 33.08 | 31.88 | 29.48 | 34.53 | 31.17 |
| ECSIT    | 27.1  | 27.16 | 22.87 | 22.83 | 31.8  | 29.49 | 24.14 | 25.56 |
| BRD9     | 24.94 | 27.12 | 25.48 | 25.79 | 28.37 | 29.49 | 26.17 | 27.1  |
| ABCF1    | 29.71 | 29.98 | 30.56 | 28.93 | 30.23 | 29.49 | 27.41 | 28.79 |
| SLC25A13 | 25.12 | 24.96 | 25.74 | 26.95 | 29.7  | 29.49 | 30.92 | 30.04 |
| AURKA    | 23.92 | 22.74 | 24.71 | 24.84 | 31.63 | 29.49 | 33.3  | 33    |
| PMM1     | 30.09 | 29.76 | 29.41 | 25.89 | 28.9  | 29.5  | 25.55 | 24.64 |
| PTGFRN   | 32.82 | 33.46 | 33.49 | 33.66 | 28.66 | 29.51 | 29.48 | 29.77 |
| CECR5    | 32.51 | 29.43 | 31.75 | 29.47 | 28.83 | 29.53 | 25.39 | 23.93 |
| EIF2B5   | 29.27 | 29.22 | 27.85 | 27.43 | 31.19 | 29.53 | 30.5  | 27.45 |
| ABCF3    | 28.23 | 27.98 | 27.02 | 27.14 | 29.33 | 29.54 | 26.08 | 26.81 |
| FARSB    | 26.57 | 24.64 | 25.48 | 26.05 | 31.3  | 29.54 | 36.76 | 28.81 |
| BCCIP    | 23.6  | 25.6  | 27.03 | 29.53 | 27.45 | 29.57 | 38.5  | 34.02 |
| FTSJ1    | 25.43 | 25.73 | 25.33 | 23.86 | 29.36 | 29.59 | 24.69 | 26.48 |
| KLF5     | 24.95 | 24.21 | 26.54 | 27.86 | 28.09 | 29.59 | 30.92 | 30.65 |
| PDHB     | 28.72 | 29.03 | 28.47 | 29.02 | 29.23 | 29.61 | 32.51 | 32    |
| NDUFA10  | 25.64 | 25.87 | 25.19 | 26.32 | 29.63 | 29.65 | 28.25 | 28.81 |
| PAM16    | 28.12 | 27.98 | 24.33 | 24.01 | 30.34 | 29.67 | 26.07 | 27.51 |
| SEC22B   | 29.39 | 30.48 | 31.01 | 31.61 | 30.84 | 29.68 | 36.85 | 35.09 |
| COPRS    | 32.21 | 32.82 | 31.92 | 28.87 | 30.39 | 29.7  | 26.43 | 26.55 |
| CRLS1    | 30.62 | 29.1  | 30.05 | 25.92 | 30.46 | 29.7  | 27.39 | 26.64 |
| PMP22    | 29.77 | 31.36 | 30.78 | 29.99 | 28.81 | 29.7  | 28.58 | 31.09 |
| BCAS4    | 31.35 | 33.27 | 31.6  | 30.2  | 30.01 | 29.71 | 23.46 | 28.42 |
| USP39    | 29.58 | 30.84 | 31.88 | 29.61 | 31.78 | 29.74 | 30.09 | 28.61 |
| SDCCAG3  | 24.13 | 23.36 | 23.14 | 21.66 | 29.8  | 29.75 | 28.62 | 27.54 |
| SURF1    | 26.82 | 27.53 | 25.11 | 23.18 | 30.01 | 29.76 | 21.53 | 26.41 |
| LAS1L    | 32.91 | 29.18 | 31.25 | 29.62 | 33.43 | 29.76 | 28.94 | 29.53 |
| CNOT7    | 26.7  | 27.52 | 29.09 | 31.83 | 32.8  | 29.76 | 39.9  | 37.36 |
| MCCC2    | 25.06 | 23.81 | 25.18 | 27.23 | 28.73 | 29.8  | 34.44 | 32.1  |
| MED16    | 31.23 | 31.21 | 29.37 | 26.94 | 27.68 | 29.81 | 20.74 | 22.61 |
| ELK1     | 27.47 | 30.35 | 27.35 | 27.09 | 26.87 | 29.81 | 22.83 | 25.6  |
| CWC15    | 28.98 | 28.35 | 30.06 | 34.42 | 31.66 | 29.81 | 37.98 | 37.03 |
| DTX2     | 28.26 | 26.39 | 26.71 | 24.91 | 27.7  | 29.82 | 25.12 | 25.85 |
| YME1L1   | 27.73 | 24.56 | 30.82 | 33.75 | 30.37 | 29.82 | 42.76 | 36.32 |
| ALAS1    | 30.01 | 32.13 | 29.8  | 29.67 | 28.67 | 29.83 | 27.47 | 28.03 |
| C7orf49  | 28.21 | 30.36 | 28.57 | 28.48 | 30.45 | 29.85 | 28.43 | 26.37 |
| LAMC2    | 31.45 | 30.55 | 29.71 | 30.77 | 30.14 | 29.86 | 32.11 | 28.16 |
| VIMP     | 28    | 27.31 | 26.12 | 30.76 | 30.82 | 29.86 | 28.93 | 29.79 |
| WDR82    | 31.66 | 31.94 | 30.94 | 31.95 | 31.16 | 29.86 | 29.83 | 31.02 |
| TAP1     | 34.73 | 35.18 | 33.09 | 30.94 | 30.62 | 29.87 | 27.63 | 26.68 |
| TMEM30A  | 27.43 | 26.34 | 31.92 | 38.26 | 32.76 | 29.87 | 51.03 | 42.07 |
| AJUBA    | 30.33 | 28.93 | 30.28 | 30.28 | 31.12 | 29.89 | 28.13 | 27.97 |
| KIAA0141 | 28.17 | 24.68 | 26.64 | 26.69 | 28.95 | 29.9  | 25.73 | 26.79 |
| NSDHL    | 30.22 | 31.21 | 30.08 | 28.32 | 28.37 | 29.91 | 26.72 | 27.72 |
| PPP2R5D  | 28.55 | 28.16 | 26.86 | 26.11 | 29.58 | 29.92 | 26.95 | 28.31 |

|           |       |       |       |       |       |       |       |       |
|-----------|-------|-------|-------|-------|-------|-------|-------|-------|
| GRK5      | 32.73 | 32.3  | 33.21 | 31.52 | 27.92 | 29.94 | 27.78 | 31.06 |
| MFSD14B   | 25.65 | 25.45 | 29.36 | 29.59 | 28.95 | 29.95 | 33.99 | 32.63 |
| CISD3     | 29.36 | 28.35 | 27.25 | 27.43 | 30.27 | 29.96 | 22.54 | 25.09 |
| RSL24D1   | 26.21 | 26.9  | 27.2  | 29.48 | 30.55 | 29.96 | 39.3  | 33.73 |
| TRIM74    | 28.44 | 28.76 | 29.23 | 32.11 | 29.35 | 29.97 | 32.26 | 31.98 |
| TNFRSF12A | 27.98 | 26.54 | 28.49 | 26.05 | 32.69 | 29.99 | 24.3  | 21.08 |
| TARDBP    | 30.46 | 28.98 | 31.39 | 32.75 | 32.68 | 29.99 | 40.39 | 37.4  |
| ZBTB7B    | 31.1  | 31.41 | 29.42 | 30.24 | 31.13 | 30.02 | 25.08 | 26.83 |
| CDC42EP4  | 36.54 | 36.12 | 33.1  | 32.34 | 32.56 | 30.02 | 26.84 | 30.33 |
| SCARF2    | 27.08 | 26.62 | 26.15 | 25.5  | 26.25 | 30.03 | 19.86 | 24.03 |
| INTS3     | 28.34 | 27.7  | 27.96 | 27.63 | 28.14 | 30.04 | 30.07 | 30.38 |
| DDX54     | 27.9  | 28.49 | 26.87 | 25.36 | 29.83 | 30.1  | 23.27 | 24.89 |
| PTRHD1    | 32.16 | 27.75 | 31.14 | 29.61 | 29.89 | 30.1  | 25.57 | 25.93 |
| AIMP2     | 29.04 | 27.72 | 25.29 | 26.57 | 30.16 | 30.1  | 25.46 | 28.24 |
| PYGO2     | 32.68 | 34.06 | 31.65 | 30.82 | 30.77 | 30.11 | 28.49 | 30.01 |
| XBP1      | 38    | 37.68 | 36.21 | 36.01 | 32.59 | 30.12 | 31.13 | 28.6  |
| CDC42EP1  | 28.73 | 29.7  | 28.69 | 25.93 | 30.45 | 30.13 | 21.95 | 24.19 |
| FKBP3     | 30.09 | 32.26 | 32.1  | 33.93 | 33.16 | 30.13 | 40.4  | 36.29 |
| MTX1      | 31.77 | 31.92 | 27.8  | 27.38 | 31    | 30.14 | 25.62 | 26.13 |
| UBE2A     | 28.87 | 29.01 | 29.17 | 29.5  | 32.27 | 30.14 | 32.91 | 30.99 |
| NOP58     | 27.85 | 26.03 | 29.46 | 32.73 | 30.53 | 30.15 | 41.44 | 37.31 |
| CREB3     | 31.58 | 34.78 | 31.86 | 31.27 | 27.53 | 30.16 | 24.7  | 27.46 |
| ACD       | 28.25 | 30.14 | 26.87 | 26.6  | 29.89 | 30.17 | 22.92 | 25.15 |
| ASL       | 31.86 | 31.53 | 30.86 | 27.4  | 29.92 | 30.18 | 22.83 | 25.12 |
| ZC3H7B    | 33.39 | 32.84 | 33.02 | 32.59 | 29.76 | 30.18 | 24.3  | 27.27 |
| THEM6     | 31.05 | 31.8  | 29.55 | 27.76 | 27.87 | 30.19 | 22.12 | 22.56 |
| WSB2      | 22.95 | 24.97 | 23.58 | 24.19 | 30.05 | 30.21 | 30.27 | 28.41 |
| TRAPPC12  | 27.13 | 29.28 | 26.71 | 25.73 | 29.18 | 30.23 | 26.27 | 25.8  |
| IRF2BPL   | 32.59 | 32.64 | 33.21 | 31.45 | 27.7  | 30.24 | 22.62 | 23.14 |
| IAH1      | 30.92 | 30.51 | 28.56 | 29.7  | 30.25 | 30.25 | 26.86 | 27.41 |
| POLR2K    | 27.87 | 31.71 | 31.25 | 31.77 | 31.87 | 30.25 | 38.63 | 34.34 |
| CAT       | 28.22 | 28.04 | 30.89 | 30.43 | 30.4  | 30.26 | 34.36 | 31.28 |
| ACTR3     | 28.89 | 27.43 | 30.73 | 33.23 | 31.82 | 30.26 | 39.19 | 35.39 |
| ISG20L2   | 29.96 | 31.44 | 29.29 | 29.52 | 30.17 | 30.28 | 28.24 | 31.06 |
| PGM1      | 33.75 | 34.31 | 34.39 | 33.06 | 27.17 | 30.34 | 26.92 | 26.99 |
| MAU2      | 29.53 | 26.35 | 27.88 | 26.54 | 29.75 | 30.35 | 26.35 | 26.73 |
| FNTA      | 26.5  | 26.68 | 27.46 | 30.11 | 30.07 | 30.36 | 35.75 | 32.55 |
| PRKD2     | 33.39 | 34.39 | 30.47 | 29.54 | 26.7  | 30.37 | 23.78 | 26.88 |
| MLLT1     | 31.4  | 29.4  | 30.26 | 30.32 | 30.12 | 30.37 | 24.61 | 27.01 |
| SEPHS2    | 28.78 | 27.9  | 27.59 | 26.78 | 31.66 | 30.38 | 28.45 | 30.39 |
| SV2A      | 27.29 | 30.59 | 28.45 | 30.16 | 29.9  | 30.38 | 28.68 | 30.62 |
| PIEZO1    | 27.48 | 26.95 | 27.21 | 26.54 | 27.9  | 30.4  | 23.38 | 25.64 |
| SDF2L1    | 31.43 | 32.72 | 31.18 | 25.06 | 25.93 | 30.41 | 19.28 | 19.75 |
| ACOT8     | 29.76 | 29.65 | 27.56 | 25.56 | 29.46 | 30.44 | 23.02 | 25.49 |
| COMMD3    | 30.83 | 29.71 | 28.48 | 29.42 | 30.05 | 30.45 | 31.9  | 29.58 |
| GTF2F1    | 31.3  | 32.77 | 31.52 | 29.13 | 30.58 | 30.47 | 24.85 | 28.29 |
| SLC39A14  | 26.79 | 26.22 | 27.05 | 26.84 | 31.58 | 30.49 | 32.93 | 30.89 |
| COPG2     | 26.91 | 29.12 | 27.86 | 27.43 | 30.13 | 30.5  | 32.03 | 31.65 |
| VCL       | 29.06 | 30.66 | 30.1  | 31.45 | 31.04 | 30.51 | 32.56 | 31.67 |
| TMEM208   | 30.59 | 30.22 | 28.49 | 27.67 | 30.17 | 30.52 | 26.7  | 24.6  |
| CSPG4     | 32.56 | 36.04 | 30.77 | 30    | 26.57 | 30.52 | 23.01 | 28.08 |
| DNAJC11   | 29.96 | 29.52 | 30.26 | 28.14 | 30.58 | 30.54 | 29.39 | 29.66 |
| LDLRAP1   | 29.35 | 32.08 | 29.46 | 28.9  | 27.95 | 30.55 | 26.49 | 27.14 |
| POLD1     | 34.06 | 32.9  | 31.11 | 29.39 | 28.02 | 30.56 | 22.54 | 22.12 |
| CHTOP     | 28.38 | 28.07 | 30.09 | 28.17 | 29.52 | 30.56 | 28.11 | 27    |
| NIT2      | 30.01 | 25.33 | 29.58 | 31.97 | 28.29 | 30.56 | 32.95 | 32.75 |
| LSM3      | 31.02 | 30.91 | 29.15 | 30.61 | 32.01 | 30.58 | 32.98 | 33.46 |
| NECAP2    | 31.33 | 32.17 | 29.41 | 29.18 | 32.21 | 30.59 | 27.76 | 30.99 |
| TRIOBP    | 34.7  | 34.83 | 31.76 | 30.07 | 30.42 | 30.6  | 26.93 | 26.9  |
| HS6ST1    | 34.99 | 35.51 | 34.6  | 30.77 | 30    | 30.6  | 23.95 | 27.61 |
| TFRC      | 24.26 | 22.97 | 26.89 | 30.06 | 33.61 | 30.6  | 42.36 | 34.54 |
| CNIH1     | 29.88 | 30.29 | 30.85 | 30.42 | 31.57 | 30.6  | 37.46 | 35.36 |
| OSTC      | 28.45 | 31.66 | 30.04 | 31.9  | 32.11 | 30.6  | 38.18 | 35.43 |
| RERE      | 27.4  | 28.98 | 28.76 | 30.45 | 29.22 | 30.61 | 26.84 | 28.9  |
| NECTIN2   | 33.49 | 36.1  | 30.68 | 31.47 | 30.05 | 30.62 | 23.79 | 27.37 |
| SEC23A    | 29.89 | 28.03 | 30.35 | 33.31 | 30.81 | 30.64 | 40.31 | 36.9  |
| BCR       | 29.87 | 31.03 | 30.35 | 27.41 | 28.56 | 30.65 | 24.88 | 27.41 |
| TGIF1     | 27.77 | 30.49 | 29.11 | 30.55 | 28.52 | 30.67 | 29.12 | 30.87 |
| TM9SF2    | 28.65 | 28.08 | 31.07 | 32.35 | 29.57 | 30.69 | 37.17 | 32.97 |
| BRD7      | 29.92 | 28.8  | 32.8  | 33.4  | 33.02 | 30.69 | 38.54 | 34.63 |
| CDK11B    | 32.3  | 30.65 | 30.89 | 29.11 | 30.48 | 30.7  | 28.8  | 29.12 |
| UBE2T     | 30.65 | 26.88 | 29.45 | 29.98 | 31.19 | 30.7  | 36.26 | 32.9  |
| YY1       | 28.38 | 28.32 | 32    | 29.72 | 28.66 | 30.73 | 29.79 | 29.36 |
| DLD       | 24.88 | 23.12 | 27.09 | 30.69 | 30.36 | 30.73 | 43.79 | 37.92 |
| XPO7      | 28.93 | 29.78 | 29.63 | 29.99 | 29.92 | 30.75 | 32.82 | 30.58 |
| DDX21     | 22.75 | 20.21 | 26.61 | 29.63 | 34.77 | 30.75 | 47.46 | 42.47 |
| SAFB2     | 31.28 | 29.46 | 28.65 | 29.72 | 32.55 | 30.77 | 29.19 | 30.31 |
| DIDO1     | 31.26 | 29.38 | 31.96 | 32.02 | 31.12 | 30.78 | 33.59 | 31.21 |
| ATP6V1B2  | 28.76 | 28.24 | 27.31 | 27.97 | 30.33 | 30.79 | 31.52 | 28.42 |
| PAIP1     | 30.59 | 28.42 | 32.9  | 32.85 | 31.34 | 30.8  | 37.55 | 33.76 |
| NDUFA6    | 28.57 | 29.14 | 28.48 | 27.84 | 30.47 | 30.82 | 26.92 | 28.1  |
| MACROD1   | 28.32 | 26.25 | 27.67 | 27.99 | 27.46 | 30.84 | 23.14 | 24.47 |
| NUP93     | 29.33 | 30.78 | 29.53 | 28.28 | 29.21 | 30.85 | 28.33 | 28.18 |

|          |       |       |       |       |       |       |       |       |
|----------|-------|-------|-------|-------|-------|-------|-------|-------|
| NR2C2AP  | 26.85 | 27.47 | 27.63 | 28    | 29.72 | 30.86 | 27.95 | 26.3  |
| RNF7     | 28.59 | 30.3  | 31.53 | 29.04 | 31.99 | 30.87 | 31.5  | 32.7  |
| SEPW1    | 39.84 | 40.84 | 37.92 | 34.32 | 33.29 | 30.89 | 28.35 | 31.74 |
| TRIP13   | 26.53 | 23.9  | 25.99 | 25.47 | 32.96 | 30.9  | 34.76 | 27.79 |
| EMG1     | 30.99 | 30.8  | 30.53 | 29.64 | 33.87 | 30.93 | 30.95 | 31.14 |
| C8orf82  | 30.1  | 31.37 | 30.25 | 26.59 | 27.26 | 30.94 | 20.1  | 24.39 |
| MAP3K11  | 31.8  | 32.79 | 29.56 | 28.79 | 29.5  | 30.99 | 22.03 | 25.67 |
| SLC35E2B | 28.76 | 29.55 | 30.15 | 29.66 | 30.78 | 31.06 | 30.81 | 30.31 |
| MTHFD2   | 29.85 | 27.66 | 31.53 | 30.36 | 34.38 | 31.06 | 35.99 | 35.26 |
| ZNF655   | 27.95 | 26.95 | 28.48 | 33.42 | 31.54 | 31.06 | 44.97 | 41.09 |
| ALKBH5   | 33.4  | 35.26 | 33.08 | 32.61 | 28.99 | 31.07 | 24.41 | 26.97 |
| MAVS     | 29.25 | 29.82 | 28.93 | 28.69 | 30.57 | 31.07 | 29.37 | 30.51 |
| DKC1     | 31.12 | 29.65 | 31.26 | 31.92 | 35.39 | 31.07 | 37.29 | 34.85 |
| WDR45    | 27.17 | 30.24 | 28.26 | 26.66 | 28.94 | 31.08 | 26.46 | 28.32 |
| CBWD5    | 32.67 | 25.45 | 32.22 | 32.4  | 32.37 | 31.09 | 40.07 | 38.64 |
| PCNX3    | 27.09 | 28.47 | 27.6  | 26.33 | 27.77 | 31.12 | 25.72 | 28.4  |
| MRI1     | 30.89 | 26.34 | 28.53 | 29.28 | 28.33 | 31.13 | 27.04 | 28.88 |
| TEX261   | 27.85 | 29.82 | 29.53 | 30.04 | 33.24 | 31.18 | 32.77 | 33.82 |
| SOX12    | 32.44 | 33.66 | 30.66 | 29.47 | 29.26 | 31.19 | 23.08 | 26.04 |
| EHMT2    | 32.85 | 31.46 | 31.17 | 29.7  | 29.16 | 31.2  | 26.03 | 28.11 |
| HMOX2    | 29.81 | 29.7  | 28.24 | 28.27 | 32.7  | 31.22 | 26.82 | 28.79 |
| STEAP3   | 26.47 | 26.92 | 25.13 | 25.97 | 30.1  | 31.23 | 28    | 29.23 |
| IMPA2    | 36.43 | 35.35 | 34.03 | 34.05 | 30.29 | 31.23 | 25.45 | 30.23 |
| ABCC1    | 30.63 | 30.63 | 30.25 | 31.24 | 30.66 | 31.25 | 32.21 | 30.64 |
| NCBP2    | 26.77 | 25.63 | 29.58 | 31.89 | 34.81 | 31.25 | 43.48 | 40.5  |
| USE1     | 33.52 | 34.92 | 31.54 | 32.12 | 34    | 31.28 | 25.93 | 26.9  |
| SEC31A   | 33.31 | 32.51 | 33.26 | 34.09 | 33.92 | 31.28 | 36.29 | 34.96 |
| NECAB3   | 27.89 | 26.66 | 27.15 | 26.72 | 29.67 | 31.29 | 26.27 | 27.75 |
| CDT1     | 34.31 | 32.98 | 31.01 | 29.71 | 32.26 | 31.31 | 23.46 | 23.74 |
| LGALS3   | 28.43 | 30.52 | 26.89 | 27.79 | 30.64 | 31.32 | 29.81 | 30.92 |
| HIGD1A   | 28.21 | 28.76 | 28.62 | 30.58 | 33.28 | 31.32 | 39    | 35.15 |
| DEF8     | 33.4  | 32.4  | 30.11 | 28.84 | 30.72 | 31.33 | 24.76 | 27.12 |
| LSM12    | 32.16 | 32.88 | 32.06 | 35.54 | 36.23 | 31.35 | 36.14 | 36.33 |
| SIRT2    | 29.4  | 31.42 | 29.19 | 27.99 | 31.07 | 31.39 | 25.07 | 29.44 |
| ITGB1BP1 | 25.87 | 25.11 | 29.15 | 29.42 | 31.12 | 31.39 | 34.4  | 29.62 |
| UROS     | 29.6  | 30.23 | 30.03 | 28.06 | 31.29 | 31.39 | 32.15 | 29.76 |
| PHLDB1   | 35    | 34.75 | 32.75 | 33.53 | 31.13 | 31.39 | 27.42 | 30.22 |
| MINK1    | 32.44 | 31.97 | 31.15 | 30.4  | 30.01 | 31.4  | 29.25 | 30.14 |
| DECR1    | 27.29 | 26.55 | 28.53 | 30.1  | 33.59 | 31.4  | 36.38 | 34.19 |
| EHBP1L1  | 31.71 | 30.1  | 29.21 | 28.68 | 28.75 | 31.42 | 25.41 | 27.51 |
| SIL1     | 28.75 | 30.09 | 29.07 | 27.52 | 29.23 | 31.5  | 28.66 | 29.22 |
| BOLA2B   | 25.37 | 23.68 | 22.6  | 21.5  | 32.46 | 31.51 | 24.66 | 26.85 |
| BOLA2    | 25.37 | 23.68 | 22.6  | 21.5  | 32.46 | 31.51 | 24.66 | 26.85 |
| PPAN     | 30.82 | 26.96 | 29.19 | 25.12 | 31.17 | 31.52 | 27.24 | 26.57 |
| CLUH     | 27.87 | 26.84 | 26.78 | 24.9  | 30.97 | 31.54 | 24.77 | 26.98 |
| ANXA4    | 29.8  | 30.3  | 30.26 | 30.49 | 33.13 | 31.55 | 37.1  | 32.72 |
| SBNO2    | 32.03 | 31.63 | 30.2  | 27.9  | 29.4  | 31.57 | 24.14 | 25.35 |
| HSD17B4  | 29.08 | 29.77 | 29.72 | 32.06 | 31.05 | 31.57 | 38.74 | 35.19 |
| ZC3H11A  | 26.93 | 25.11 | 32.5  | 39.18 | 33.13 | 31.57 | 50.48 | 44.57 |
| NSFL1C   | 33.44 | 34.84 | 33.23 | 32.95 | 32.8  | 31.58 | 29.47 | 29.26 |
| METTL9   | 29.85 | 27.57 | 30.48 | 29.59 | 31.9  | 31.58 | 36.09 | 33.93 |
| AIG1     | 30.24 | 30.73 | 29.72 | 31.3  | 30.36 | 31.58 | 35.02 | 34.1  |
| ACTA2    | 28.65 | 29.07 | 27.73 | 28.71 | 31.86 | 31.59 | 25.63 | 26.74 |
| VEGFB    | 33.58 | 33.2  | 31.49 | 30.76 | 28.35 | 31.61 | 23.2  | 25.79 |
| P4HTM    | 32.42 | 31.87 | 31.02 | 28.36 | 29.26 | 31.62 | 25.31 | 25.82 |
| EDEM1    | 26.63 | 25.17 | 30.27 | 32.65 | 33.16 | 31.62 | 38.02 | 34.88 |
| ANKRD11  | 30.95 | 29.24 | 31.63 | 33.89 | 31.78 | 31.63 | 32.83 | 32.75 |
| HES2     | 23.49 | 23.43 | 22.84 | 22.49 | 29.45 | 31.65 | 30    | 30.14 |
| DAXX     | 32.72 | 32.14 | 31.73 | 30.45 | 31.65 | 31.66 | 29.03 | 29.68 |
| PFKM     | 28.42 | 29.64 | 28.83 | 27.98 | 33.09 | 31.66 | 31.05 | 32.45 |
| POLR3D   | 29.04 | 30.66 | 29.96 | 28.83 | 33.45 | 31.69 | 30.75 | 28.19 |
| TMEM165  | 29.38 | 27.93 | 29.46 | 28.16 | 31.77 | 31.72 | 30.72 | 30.21 |
| MRGBP    | 31.12 | 29.69 | 31.03 | 29.18 | 32.43 | 31.74 | 28.39 | 29.73 |
| SORT1    | 28.9  | 28.36 | 30.86 | 31.45 | 32.3  | 31.74 | 35.18 | 34.78 |
| LENG8    | 28.23 | 25.41 | 29.88 | 32.13 | 30.97 | 31.75 | 40.99 | 37.73 |
| C19orf70 | 30.37 | 32.26 | 27.91 | 25.92 | 33.97 | 31.78 | 24.27 | 27.73 |
| TTC1     | 31.06 | 32.91 | 34.3  | 33.83 | 38.21 | 31.79 | 38.29 | 33.84 |
| TBC1D17  | 29.52 | 30.64 | 29.43 | 28.98 | 29.51 | 31.82 | 24.38 | 28.79 |
| MFSD3    | 30.17 | 31.19 | 30.09 | 25.93 | 28.15 | 31.83 | 21.26 | 24.19 |
| SOD2     | 26.87 | 22.91 | 27.45 | 31.02 | 30.39 | 31.85 | 33.1  | 30.83 |
| RNF167   | 34.36 | 33.76 | 33.22 | 33.67 | 32.17 | 31.85 | 27.08 | 33.43 |
| ADGRE5   | 25.69 | 26.35 | 24.77 | 24.62 | 32.24 | 31.88 | 29.03 | 29.99 |
| SPG7     | 29.22 | 29.19 | 30.33 | 30    | 30.2  | 31.89 | 32.52 | 31.23 |
| PSMD1    | 28.02 | 26.4  | 29.71 | 31.26 | 32.32 | 31.89 | 38.21 | 35.26 |
| ASAH1    | 27.61 | 27.68 | 30.89 | 35.28 | 32.67 | 31.89 | 46.4  | 40.52 |
| POLDIP3  | 29.66 | 31.61 | 31.41 | 30.55 | 31.7  | 31.9  | 27.84 | 26.15 |
| CRAT     | 33.03 | 33.05 | 30.77 | 29.74 | 31.77 | 31.9  | 26.01 | 27.76 |
| S100A13  | 35.24 | 36.05 | 33.81 | 32.9  | 33.49 | 31.92 | 29.69 | 31.92 |
| C19orf24 | 35.02 | 31.38 | 32.53 | 30.15 | 30.28 | 31.96 | 22.68 | 26.96 |
| EGFR     | 32.17 | 30.05 | 33.51 | 36.65 | 32.1  | 31.96 | 35.15 | 34.34 |
| TRIM25   | 40.98 | 41.06 | 39.86 | 39.35 | 31.93 | 31.97 | 29.9  | 29.96 |
| AKR1C3   | 33.89 | 31.49 | 32.64 | 29.95 | 32.71 | 31.97 | 32.75 | 34.69 |
| TNKS1BP1 | 37.71 | 37.12 | 36.55 | 36.03 | 30.71 | 31.99 | 25.96 | 30.1  |
| BAZ1B    | 34.9  | 31.09 | 36.06 | 35.92 | 33.74 | 32    | 35.93 | 35.49 |
| UBTF     | 36.69 | 37.61 | 36.13 | 34.49 | 32.69 | 32.03 | 28.57 | 29.3  |
| PACSIN2  | 35.68 | 36.99 | 34.62 | 34.01 | 33.37 | 32.03 | 30    | 30.35 |
| CC2D1A   | 32.39 | 32.61 | 31.57 | 28.97 | 32.3  | 32.04 | 26.08 | 27.58 |
| SMG5     | 31.56 | 32.86 | 31.21 | 31.08 | 31.84 | 32.04 | 29.96 | 31.37 |

|          |       |       |       |       |       |       |       |       |
|----------|-------|-------|-------|-------|-------|-------|-------|-------|
| LRWD1    | 32.2  | 31.58 | 29.03 | 28.49 | 30.47 | 32.05 | 22.93 | 26.33 |
| KREMEN2  | 35.14 | 35.33 | 32.71 | 31.23 | 28.12 | 32.08 | 23.55 | 26.62 |
| AKR7A2   | 30.71 | 32.33 | 30.29 | 27.32 | 30.45 | 32.1  | 25.22 | 27.23 |
| NAGK     | 33.33 | 33.48 | 30.53 | 29.12 | 30.57 | 32.11 | 28.2  | 26.16 |
| GLRX5    | 30.67 | 30.41 | 31.84 | 28.75 | 33.39 | 32.12 | 29.89 | 29.07 |
| RHBDF2   | 29.57 | 29.09 | 29.55 | 27.31 | 32.11 | 32.12 | 27.3  | 29.18 |
| B3GALT6  | 29.52 | 29.48 | 27.91 | 24.82 | 29.24 | 32.14 | 23.75 | 26.86 |
| TXNDC12  | 33.99 | 33.38 | 36.34 | 36.03 | 35.35 | 32.14 | 38.69 | 37.51 |
| CLCN7    | 26.47 | 26.53 | 25.69 | 24.25 | 30.41 | 32.2  | 25.56 | 27.49 |
| SPTAN1   | 34.06 | 33.82 | 33.46 | 31.84 | 30.96 | 32.21 | 30.53 | 29.88 |
| PRRC2C   | 30.56 | 30.83 | 34.4  | 40.25 | 33.48 | 32.22 | 46.27 | 44.7  |
| COL17A1  | 29.28 | 29.61 | 30.78 | 31.45 | 33.2  | 32.23 | 33.85 | 32.37 |
| SLC26A2  | 33.74 | 30.24 | 38.61 | 44.22 | 31.05 | 32.23 | 46.08 | 45.13 |
| UBE2R2   | 33.21 | 35.14 | 32.65 | 32.25 | 31.97 | 32.25 | 30.11 | 30.5  |
| TAF9     | 31.06 | 30.42 | 31.25 | 32.28 | 38.28 | 32.25 | 43.45 | 41.05 |
| CPNE3    | 29.51 | 28.43 | 32.76 | 33.09 | 34.91 | 32.27 | 42.56 | 37.92 |
| GTF2E2   | 33.58 | 31.47 | 30.63 | 30.85 | 35.03 | 32.28 | 36.1  | 31.64 |
| MRT04    | 29.74 | 30.97 | 30.39 | 27.57 | 32.65 | 32.31 | 29.54 | 30.74 |
| CIAPIN1  | 30.03 | 30.83 | 31.09 | 27.87 | 31.02 | 32.31 | 32.58 | 32.01 |
| ARMC10   | 33.43 | 29.94 | 33.85 | 33.96 | 33.24 | 32.32 | 37.11 | 34.45 |
| GJA1     | 34.69 | 34.07 | 41.07 | 43.89 | 35.4  | 32.32 | 50.22 | 41.87 |
| HMCES    | 35.27 | 33.91 | 34.85 | 32.63 | 32.65 | 32.33 | 30.61 | 29.51 |
| DDX41    | 34.82 | 33.67 | 34.68 | 31.9  | 31.78 | 32.33 | 27.56 | 30.64 |
| GOT1     | 29.7  | 30.12 | 29.09 | 27.18 | 32.76 | 32.33 | 30.16 | 33.23 |
| SERPINB6 | 31.84 | 32.62 | 32.77 | 30.6  | 32.52 | 32.34 | 31.89 | 32.04 |
| CTNNDL1  | 33.42 | 32.27 | 31.68 | 29.67 | 30.9  | 32.36 | 30.42 | 30.27 |
| TSPAN17  | 32.35 | 33.68 | 32.8  | 31.06 | 31.84 | 32.38 | 26.99 | 29.4  |
| TCEB1    | 29.17 | 31.74 | 32.01 | 36.15 | 34.37 | 32.4  | 40.71 | 37.12 |
| MAPKAP1  | 28.14 | 28.52 | 29.22 | 31.55 | 32.73 | 32.41 | 33.27 | 30.3  |
| VTI1B    | 30.43 | 26.89 | 29.8  | 30.97 | 32.84 | 32.41 | 31.41 | 33.01 |
| SFXN1    | 31.92 | 31.09 | 33.41 | 32.6  | 36.68 | 32.42 | 33.95 | 34.02 |
| WDR46    | 28.84 | 29.55 | 29.08 | 26.56 | 32.22 | 32.43 | 27.71 | 28.27 |
| SRXN1    | 22.12 | 23.01 | 24.13 | 23.62 | 34.51 | 32.44 | 31.89 | 31.87 |
| TCFL5    | 30.67 | 28.37 | 29.7  | 28.57 | 28.81 | 32.46 | 25.52 | 27.48 |
| ZNF581   | 33.64 | 34.56 | 34.2  | 31.55 | 34.49 | 32.46 | 26.06 | 28.02 |
| CNOT3    | 33.07 | 35.41 | 32.98 | 30.94 | 32.22 | 32.49 | 26.57 | 29.12 |
| MRPL9    | 29.32 | 32.8  | 32.17 | 31.28 | 35.14 | 32.5  | 31.02 | 29.44 |
| TBC1D10B | 34.59 | 34.44 | 33.38 | 30.73 | 31.52 | 32.52 | 26.52 | 27.36 |
| BICD2    | 31.17 | 31.24 | 31.68 | 30.92 | 31.12 | 32.52 | 29.38 | 30.18 |
| CYFIP2   | 26.27 | 26.09 | 26.66 | 25.25 | 34.54 | 32.53 | 31.46 | 32.22 |
| PARL     | 27.47 | 30.03 | 28.6  | 29.96 | 32.23 | 32.54 | 31.78 | 31.68 |
| TST      | 28.53 | 29.37 | 25.57 | 23.61 | 32.23 | 32.56 | 22.41 | 26.76 |
| EML3     | 32.56 | 32.26 | 30.29 | 31    | 29.85 | 32.57 | 26.27 | 29.56 |
| ARL6IP5  | 29.63 | 29.25 | 30.93 | 32.23 | 33.47 | 32.57 | 38.04 | 36.51 |
| ZDHHC16  | 30.81 | 31.32 | 29.93 | 29.87 | 31.95 | 32.59 | 29.49 | 31.75 |
| C11orf58 | 32.52 | 31.16 | 34.1  | 36.95 | 34.67 | 32.59 | 43.09 | 40.11 |
| PAK4     | 34    | 36.19 | 33.29 | 30.86 | 30.99 | 32.6  | 21.55 | 25.88 |
| ATP13A2  | 30.88 | 31.49 | 29.77 | 27.22 | 30.47 | 32.64 | 23.27 | 26.41 |
| TUBGCP2  | 29.6  | 30.04 | 27.45 | 28.46 | 32.2  | 32.65 | 25.72 | 26.32 |
| ALDH2    | 32.23 | 33.99 | 29.98 | 28.71 | 31.77 | 32.65 | 27.85 | 30.13 |
| ELAC2    | 29.75 | 27.78 | 27.93 | 25.87 | 31.65 | 32.66 | 28.07 | 28.28 |
| HMGB2    | 31.07 | 30.35 | 32.55 | 36.66 | 33.71 | 32.67 | 43.6  | 36.32 |
| NRP1     | 32.09 | 33.84 | 34.31 | 36.58 | 29.84 | 32.7  | 33.38 | 35.18 |
| PRPF31   | 33.67 | 31.87 | 32.07 | 31.54 | 33.49 | 32.72 | 28.99 | 29.18 |
| ABR      | 37.27 | 37.16 | 37.3  | 36.22 | 32.24 | 32.72 | 29.7  | 32.55 |
| SRSF1    | 35.05 | 31.45 | 36.82 | 37.77 | 35.87 | 32.75 | 42.94 | 36.7  |
| C11orf84 | 34.24 | 34.44 | 33.82 | 31.89 | 31.53 | 32.76 | 25.89 | 30.29 |
| TMEM129  | 32.91 | 33.28 | 30.43 | 30.39 | 31.26 | 32.77 | 25.45 | 29.69 |
| NUDCD2   | 27.95 | 28.85 | 29.93 | 28.85 | 31.31 | 32.77 | 32.34 | 31.33 |
| XAB2     | 35.88 | 33.28 | 33.63 | 29.99 | 32.58 | 32.78 | 28.35 | 28.04 |
| THAP4    | 31.36 | 30.16 | 29.3  | 26.53 | 32.29 | 32.79 | 27.92 | 27.74 |
| NT5E     | 36.38 | 34.28 | 42.5  | 44.65 | 34.62 | 32.79 | 47.75 | 42.08 |
| DHX40    | 30.43 | 27.1  | 33.81 | 35.07 | 32.36 | 32.8  | 45.35 | 37.83 |
| CMC2     | 29.04 | 27.68 | 28.42 | 29.04 | 30.98 | 32.82 | 33.11 | 31.7  |
| FTSJ3    | 30.98 | 31.01 | 32.06 | 29.37 | 35.22 | 32.82 | 30.8  | 32.04 |
| CHP1     | 30.1  | 30.38 | 31.3  | 31.94 | 31.88 | 32.83 | 30.82 | 32.37 |
| GTF3C5   | 34.62 | 32.78 | 31.4  | 30.99 | 33.42 | 32.87 | 29.6  | 30.34 |
| HMGCL    | 33.53 | 34.74 | 33.15 | 30.48 | 31.66 | 32.89 | 30.05 | 28.65 |
| MRPS23   | 29.59 | 30.78 | 29.83 | 30.27 | 33.6  | 32.89 | 30.27 | 29.95 |
| CKAP5    | 30.6  | 27.9  | 31.66 | 31.95 | 33.45 | 32.89 | 42.25 | 39.45 |
| TRAF3IP2 | 34.87 | 32.51 | 35.2  | 34.51 | 32.35 | 32.91 | 31.68 | 30.46 |
| RPP25L   | 28.69 | 33.59 | 31.04 | 29.3  | 31.76 | 32.92 | 26.05 | 25.58 |
| CORO2A   | 31.98 | 34.7  | 33.64 | 33.52 | 31.57 | 32.92 | 31.36 | 31.39 |
| ZNF622   | 36.18 | 36.77 | 34.04 | 35.48 | 32    | 32.97 | 26.5  | 30.38 |
| EXOC4    | 31.52 | 32.13 | 31.67 | 31.3  | 33.32 | 32.99 | 36.26 | 32.28 |
| DDX1     | 32.61 | 32.32 | 37.19 | 37.68 | 35.21 | 33    | 44.94 | 41.1  |
| B4GALT3  | 28.09 | 31.27 | 31.95 | 27.27 | 33.37 | 33.01 | 28.14 | 27.8  |
| NUP85    | 32.1  | 32.1  | 31.39 | 31.38 | 31.93 | 33.02 | 34.22 | 30.29 |
| PCYOX1L  | 31.71 | 32.83 | 32.13 | 30.93 | 35.18 | 33.06 | 32.51 | 32.75 |
| IL1RAP   | 31.92 | 29.94 | 36.09 | 42.19 | 35.65 | 33.06 | 49.97 | 45.37 |
| BRAT1    | 33.6  | 31.89 | 32.13 | 28.66 | 30.68 | 33.1  | 25.59 | 27.71 |
| MRPS27   | 31.72 | 32.47 | 34.21 | 32.31 | 35.49 | 33.11 | 36.8  | 36.25 |
| GNL3     | 28.04 | 26.79 | 30.61 | 34.09 | 34.09 | 33.13 | 45.98 | 41.39 |
| CCDC86   | 28.87 | 26.56 | 27.65 | 26.07 | 33.94 | 33.16 | 26.91 | 26.98 |
| GTF3C1   | 34.69 | 35.29 | 32.81 | 31.67 | 32.8  | 33.16 | 29.23 | 32.05 |
| SH3BP1   | 35.43 | 35.77 | 33.74 | 31.12 | 32.34 | 33.17 | 25.63 | 30.38 |
| SRPRA    | 31.62 | 31.97 | 33.54 | 31.23 | 35.97 | 33.2  | 30.39 | 33.95 |
| FAM168B  | 30.52 | 29.5  | 31.17 | 32.49 | 34.67 | 33.2  | 34.94 | 35.15 |



|          |       |       |       |       |       |       |       |       |
|----------|-------|-------|-------|-------|-------|-------|-------|-------|
| HMGCR    | 28.17 | 29.03 | 30.36 | 32.2  | 31.94 | 33.21 | 40.52 | 39.24 |
| GET4     | 29.93 | 28.06 | 29.94 | 27.98 | 29.28 | 33.22 | 27.01 | 28.74 |
| GAS2L1   | 25.55 | 26.88 | 23.79 | 21.75 | 30.25 | 33.24 | 22.45 | 26.28 |
| SERPINA1 | 25.84 | 27.97 | 25.96 | 25.57 | 33.06 | 33.25 | 30.53 | 33.31 |
| IFNGR2   | 38.39 | 37.93 | 39.92 | 40.2  | 36.51 | 33.27 | 36.47 | 35.04 |
| ZMAT2    | 29.27 | 30.95 | 32.98 | 32.66 | 35.23 | 33.29 | 38.19 | 38.01 |
| CMPK1    | 28.26 | 28    | 31.38 | 35.09 | 35.1  | 33.31 | 46.49 | 41.63 |
| WDR13    | 33.27 | 33.74 | 29.49 | 29.45 | 33.48 | 33.32 | 27.75 | 29.2  |
| SLC39A3  | 27.59 | 29.23 | 25.37 | 26.37 | 29.48 | 33.35 | 21.12 | 25.42 |
| C11orf31 | 38.35 | 37.15 | 38.91 | 36.83 | 36.34 | 33.35 | 28.23 | 28.55 |
| RNF114   | 35.29 | 36.16 | 34.23 | 35.37 | 33.91 | 33.35 | 34.39 | 32.81 |
| CDCA7L   | 35.63 | 34.25 | 35.74 | 35.51 | 36.54 | 33.35 | 38.56 | 33.13 |
| RANBP3   | 34.3  | 34.59 | 32.5  | 32.43 | 32.71 | 33.36 | 27.52 | 29.46 |
| WRAP73   | 27.38 | 24.45 | 25.42 | 22.95 | 29.06 | 33.38 | 28.35 | 26.86 |
| MELTF    | 32.98 | 35.37 | 32.71 | 31.16 | 31.39 | 33.39 | 27.3  | 30.11 |
| PKIG     | 37.63 | 38.98 | 37.38 | 34.46 | 33.47 | 33.39 | 26.27 | 31.28 |
| SPHK1    | 31.25 | 29.17 | 29.05 | 27.66 | 31.48 | 33.41 | 23.05 | 28.48 |
| PNPO     | 31.67 | 35.05 | 33.5  | 31.76 | 33.59 | 33.41 | 34.08 | 34.79 |
| MGME1    | 30.03 | 27.04 | 28.68 | 31.5  | 34.41 | 33.41 | 41.22 | 35.61 |
| FLAD1    | 30.07 | 30.43 | 29.82 | 27.36 | 30.83 | 33.43 | 27.67 | 28.78 |
| SMPD4    | 31.99 | 32.28 | 31.55 | 29.67 | 31.45 | 33.45 | 30.26 | 30.27 |
| AKIRIN1  | 31.7  | 33.46 | 33.11 | 34.64 | 33.88 | 33.45 | 36.25 | 35.47 |
| SON      | 32.78 | 30.65 | 34.66 | 35.99 | 34    | 33.45 | 43.5  | 39.31 |
| ZDHHHC24 | 26.53 | 25.02 | 25.35 | 22.48 | 25.13 | 33.47 | 19.07 | 21.84 |
| IDH2     | 35.39 | 35.65 | 32.77 | 30.87 | 33.49 | 33.47 | 26.45 | 26.92 |
| TMEM203  | 30.09 | 29.78 | 29.35 | 28.96 | 30.02 | 33.48 | 26.84 | 28.23 |
| WBP11    | 31.69 | 32.82 | 32.37 | 32.03 | 35.39 | 33.48 | 35.22 | 32.89 |
| MYBL2    | 40.56 | 37.2  | 38.78 | 35.79 | 33.17 | 33.5  | 26.69 | 24.87 |
| C5orf15  | 34.53 | 32.42 | 35.64 | 37.47 | 36.14 | 33.5  | 45.51 | 42.91 |
| NDRG3    | 32.12 | 33.71 | 32.83 | 32.93 | 37.03 | 33.53 | 35.32 | 35.1  |
| SH3TC1   | 41.04 | 40.77 | 36.84 | 35.41 | 31.2  | 33.54 | 26.11 | 27.43 |
| TFAP2A   | 35.4  | 37.03 | 36.68 | 38.28 | 31.71 | 33.54 | 32.03 | 34.85 |
| FZD5     | 32.86 | 30.22 | 33.68 | 34.91 | 34.28 | 33.55 | 33.83 | 34.5  |
| PACSIN3  | 36.6  | 37.75 | 34.51 | 31.6  | 31.69 | 33.56 | 26.84 | 30.94 |
| CFAP20   | 33.52 | 36.63 | 35.34 | 32.36 | 36.73 | 33.56 | 34.79 | 31    |
| ATP6V0E2 | 29.06 | 30.25 | 28.36 | 28.09 | 30.72 | 33.59 | 25.38 | 26.21 |
| EDEM2    | 33    | 36    | 33.5  | 33.18 | 35.25 | 33.61 | 30.01 | 32.88 |
| FAM207A  | 32.84 | 35.32 | 28.58 | 29.34 | 29.2  | 33.63 | 22.96 | 25.35 |
| IGFBP6   | 49    | 45.07 | 42.05 | 39.65 | 29.28 | 33.65 | 24.44 | 24.25 |
| ICMT     | 31.48 | 31.48 | 30.32 | 29.79 | 35.8  | 33.65 | 33.82 | 32.49 |
| MARVELD1 | 40.51 | 39.67 | 39.38 | 37.48 | 29.71 | 33.67 | 27.02 | 29.69 |
| MED25    | 35.27 | 37.79 | 35.88 | 32.58 | 33.73 | 33.67 | 27    | 30.19 |
| ADORA2B  | 35.97 | 35.88 | 35.75 | 38.04 | 34.43 | 33.68 | 52.39 | 46.86 |
| UBL7     | 30.06 | 28.71 | 30.15 | 27.29 | 34.49 | 33.69 | 34.78 | 31.86 |
| RRNAD1   | 33.72 | 35.24 | 30.42 | 32.25 | 32.13 | 33.7  | 27.34 | 28.53 |
| HYAL2    | 31.94 | 32.44 | 32.39 | 31.11 | 31.52 | 33.72 | 28.39 | 28.09 |
| AIP      | 33.91 | 35.22 | 33    | 30.85 | 30.12 | 33.73 | 24.59 | 28.18 |
| PSPH     | 35.09 | 33.8  | 34.64 | 29.78 | 34.05 | 33.76 | 28.8  | 27.63 |
| FOXK2    | 45.06 | 44.11 | 43.87 | 42.44 | 33.6  | 33.77 | 35.35 | 35.69 |
| DNAJA2   | 30.64 | 32.1  | 31.31 | 31.16 | 31.72 | 33.79 | 31.01 | 31.26 |
| PRKAG1   | 32.79 | 32.49 | 32.45 | 32.05 | 35.99 | 33.82 | 36.76 | 34.25 |
| MANEAL   | 30.2  | 29.59 | 28.92 | 27.63 | 35.45 | 33.82 | 36    | 35.82 |
| CKLF     | 34.24 | 33.62 | 32.77 | 33.12 | 33.2  | 33.83 | 27    | 28.59 |
| WIZ      | 34.43 | 36.15 | 34.96 | 37    | 35.17 | 33.86 | 37.01 | 34.3  |
| PTK2     | 32.54 | 34.16 | 32.65 | 31.47 | 32.58 | 33.88 | 28.32 | 30.11 |
| THOC7    | 33.81 | 31.8  | 35.08 | 37.49 | 34.41 | 33.9  | 41.73 | 41.58 |
| KIF22    | 34.46 | 37.39 | 38.5  | 41.68 | 35.22 | 33.91 | 43.24 | 37.53 |
| CPSF1    | 34.75 | 30.74 | 29.65 | 26.88 | 32.86 | 33.92 | 28.15 | 27.88 |
| ARL4C    | 30.66 | 30.37 | 28.77 | 27.24 | 31.56 | 33.93 | 26.2  | 26.89 |
| DNNTIP1  | 35.05 | 34.44 | 33.87 | 32.39 | 33.28 | 33.93 | 32.14 | 33.56 |
| STT3A    | 33.7  | 36.26 | 35.81 | 32.32 | 36.36 | 33.94 | 32.19 | 31.57 |
| NOP16    | 36.35 | 38    | 37.32 | 38.32 | 35.1  | 33.94 | 37.41 | 34.91 |
| RGL2     | 27.42 | 25.31 | 25.79 | 25.64 | 35.38 | 34.03 | 29.48 | 32.6  |
| TMEM222  | 31.87 | 31.92 | 29.49 | 30.45 | 32.2  | 34.09 | 30.16 | 33.37 |
| DHX30    | 31.59 | 32.33 | 32.9  | 29.32 | 31.42 | 34.12 | 28.89 | 28.53 |
| ARAF     | 33.41 | 33.55 | 31.69 | 30.49 | 32.19 | 34.13 | 28.84 | 29.75 |
| AMFR     | 30.89 | 31.39 | 28.41 | 31.87 | 32.67 | 34.16 | 28.49 | 30.14 |
| PIH1D1   | 32.43 | 33.39 | 31.11 | 31.22 | 31.2  | 34.16 | 28.58 | 31.4  |
| DDA1     | 33.89 | 33.41 | 31.99 | 29.1  | 29.79 | 34.17 | 25.83 | 26.61 |
| MGP      | 31.29 | 32.51 | 30.01 | 30.03 | 33.75 | 34.19 | 30.47 | 30.92 |
| CHST14   | 26.75 | 27.63 | 29.01 | 28.78 | 33.83 | 34.19 | 38.03 | 34.37 |
| JMJD8    | 35.55 | 37.45 | 35.66 | 32.75 | 32.27 | 34.24 | 25.08 | 29.58 |
| ETV5     | 35.12 | 36.64 | 35.21 | 33.44 | 33.67 | 34.26 | 29.43 | 29.62 |
| HACD3    | 31.57 | 34.02 | 31.74 | 31.84 | 33.37 | 34.26 | 32.04 | 35.65 |
| TPRG1L   | 32.24 | 30.17 | 31.61 | 33.85 | 34.8  | 34.26 | 39.05 | 36.32 |
| CMBL     | 31.32 | 33.07 | 34.24 | 28.41 | 34.69 | 34.29 | 31.11 | 33.68 |
| ITGA2    | 31.3  | 31.99 | 33.04 | 31.17 | 34.31 | 34.33 | 35.17 | 32.7  |
| DRG2     | 32.96 | 28.39 | 39.43 | 43.91 | 36.83 | 34.33 | 60.23 | 48.46 |
| WLS      | 30.49 | 31.4  | 30.43 | 28.64 | 33.87 | 34.34 | 29.85 | 30.11 |
| FDX1L    | 36.1  | 37.38 | 34.03 | 34.89 | 34.39 | 34.34 | 35.85 | 34.26 |
| KRI1     | 30.2  | 30    | 30    | 29.11 | 32.74 | 34.4  | 27.95 | 32.74 |
| SLC39A10 | 32.29 | 32.83 | 33.92 | 34.58 | 35.34 | 34.41 | 35.39 | 35.98 |
| IGBP1    | 24.33 | 23.94 | 28.55 | 33.61 | 33.79 | 34.45 | 55.54 | 47.92 |
| PKD1     | 35.52 | 31.56 | 33.43 | 32.32 | 36.48 | 34.46 | 35.72 | 34    |
| ZC3H18   | 35.51 | 33.99 | 34.51 | 35.44 | 30.85 | 34.48 | 32.02 | 32.9  |
| C8orf59  | 35.3  | 34.31 | 35.72 | 35.04 | 34.99 | 34.51 | 28.83 | 30.83 |
| CCNB1IP1 | 31.53 | 36.2  | 33.73 | 37.01 | 37.45 | 34.52 | 48.42 | 44.61 |
|          | 30.2  | 31.6  | 29.46 | 29.14 | 38.7  | 34.53 | 38.37 | 38.73 |

|            |       |       |       |       |       |       |       |       |
|------------|-------|-------|-------|-------|-------|-------|-------|-------|
| CYHR1      | 33.43 | 36.42 | 32.33 | 31.55 | 33.89 | 34.55 | 29.85 | 29.23 |
| ANKRD13D   | 30.43 | 32.17 | 30.73 | 30.22 | 34.22 | 34.59 | 27.18 | 31.51 |
| RIN1       | 32.02 | 31.39 | 28.26 | 26.82 | 31.44 | 34.67 | 24.31 | 26.6  |
| IGSF8      | 35.35 | 37.25 | 33.72 | 32.13 | 33.49 | 34.67 | 24.08 | 27.88 |
| FOXD1      | 34.2  | 32.89 | 35.34 | 31.98 | 29.54 | 34.68 | 26.45 | 27.48 |
| FAM134A    | 31.28 | 32.5  | 30.14 | 30.4  | 33.51 | 34.68 | 29.82 | 30.81 |
| TPCN1      | 23.08 | 23.55 | 23.17 | 24.88 | 34.89 | 34.69 | 32.44 | 33.14 |
| PSMD6      | 30.28 | 26.79 | 32.27 | 33.66 | 34.52 | 34.74 | 43.35 | 39.32 |
| SAP18      | 33.17 | 32.65 | 31.34 | 33    | 35.81 | 34.75 | 35.45 | 33.38 |
| PIAS3      | 38.2  | 38.75 | 38.11 | 37.74 | 33.23 | 34.75 | 33.43 | 36.39 |
| ADH5       | 33.2  | 34.14 | 35.04 | 33.3  | 36.61 | 34.77 | 39.14 | 35.07 |
| ATP6V1H    | 29.03 | 29.08 | 29.18 | 28.85 | 36.17 | 34.78 | 39.15 | 35.75 |
| SLC39A13   | 30.51 | 31.47 | 31.53 | 29.11 | 32.87 | 34.8  | 28.57 | 30.66 |
| DNPEP      | 38.77 | 37.88 | 35.77 | 35.43 | 35.21 | 34.81 | 30.89 | 32.85 |
| BNIP3      | 53.26 | 48.79 | 54.18 | 51.04 | 34.42 | 34.81 | 39.59 | 35.23 |
| ZCRB1      | 34.96 | 34.44 | 33.82 | 39.67 | 38.13 | 34.83 | 42.9  | 41.28 |
| SERPINF1   | 40.85 | 45.89 | 38.01 | 42.44 | 29.46 | 34.84 | 29.85 | 34.4  |
| STIM1      | 35.82 | 36.21 | 34.7  | 34.01 | 32.51 | 34.86 | 32.3  | 33.26 |
| PPP1R11    | 37.81 | 39.22 | 35.23 | 37.62 | 35.06 | 34.91 | 32.91 | 34.61 |
| EXOSC10    | 35.16 | 34.52 | 34.74 | 34.36 | 36.17 | 34.91 | 38.46 | 35.97 |
| POLR2C     | 34.4  | 35.06 | 32.28 | 31.96 | 36.49 | 34.93 | 32.18 | 33.71 |
| MRPL49     | 32.59 | 35.11 | 33.6  | 30.07 | 36.9  | 34.96 | 31.74 | 32.31 |
| B4GALT5    | 33.47 | 34.64 | 34.94 | 35.75 | 36    | 34.97 | 36.44 | 36.51 |
| SPRY2      | 40.25 | 40.43 | 39.93 | 43.21 | 35.47 | 34.99 | 36.81 | 35.24 |
| EIF2A      | 30.25 | 26.62 | 32.62 | 36.43 | 37.09 | 35    | 50.47 | 44.88 |
| CYFIP1     | 34.5  | 33.94 | 33.61 | 34.3  | 33.66 | 35.01 | 34.27 | 33.7  |
| TFDP1      | 31.63 | 31.88 | 32.9  | 34.15 | 35.38 | 35.01 | 36.35 | 34.79 |
| YTHDF1     | 34.58 | 32.51 | 32.41 | 33.11 | 34.7  | 35.08 | 33.9  | 33.48 |
| SLC7A8     | 30.55 | 32.87 | 29.17 | 31.63 | 33.55 | 35.08 | 29.21 | 35.24 |
| ARL8A      | 36.96 | 37.92 | 34.4  | 35.4  | 37.2  | 35.09 | 31.49 | 32.5  |
| SLC29A1    | 32.02 | 30.61 | 30.27 | 28.62 | 36.5  | 35.11 | 30.63 | 32.55 |
| DNAJC4     | 39.87 | 41.49 | 37.05 | 38.6  | 37.81 | 35.12 | 29.6  | 32.72 |
| LRP1       | 36.57 | 38.81 | 35.72 | 37.2  | 30.04 | 35.12 | 29.43 | 34.27 |
| PPP2CB     | 34    | 34.06 | 34.09 | 36.22 | 36.84 | 35.12 | 42.81 | 37.96 |
| SOX4       | 41.01 | 40.25 | 43.2  | 44.78 | 36.23 | 35.13 | 34.45 | 37.92 |
| ACBD6      | 32.96 | 31.05 | 30.32 | 29.89 | 33.7  | 35.16 | 30.41 | 31.5  |
| NSG1       | 33.93 | 34.83 | 33.83 | 32.15 | 32.56 | 35.16 | 31.3  | 32.28 |
| ATP2C1     | 37.73 | 33.53 | 38.46 | 39.64 | 35.96 | 35.16 | 45.02 | 41.03 |
| FOXP1      | 36.51 | 35.18 | 40.09 | 40.87 | 34.61 | 35.16 | 43.25 | 42.94 |
| PSMD14     | 31.4  | 28.31 | 32.28 | 33.91 | 35.73 | 35.16 | 42.62 | 45.34 |
| GALNS      | 34.46 | 35.85 | 33.86 | 32.6  | 32.49 | 35.18 | 29.36 | 33.65 |
| SRSF4      | 36.04 | 38.33 | 35.85 | 38    | 36.25 | 35.18 | 34.83 | 38.04 |
| CCNB1      | 32.06 | 31.26 | 32.01 | 27.6  | 41.22 | 35.21 | 39.27 | 39.19 |
| UPK3BL     | 25.99 | 28.42 | 31.3  | 33.71 | 29.21 | 35.22 | 34.08 | 31.01 |
| SMARCC2    | 39.49 | 39.54 | 38.46 | 36.9  | 34.71 | 35.24 | 34.75 | 35.62 |
| COMTD1     | 31.05 | 31.23 | 28.69 | 26.28 | 36.03 | 35.27 | 26.78 | 27.42 |
| LRRC47     | 37.72 | 36.12 | 34.64 | 33.52 | 33.97 | 35.27 | 29.78 | 33.41 |
| IST1       | 36.37 | 39.13 | 37.86 | 36.63 | 37.6  | 35.27 | 37.22 | 37.27 |
| LSM14B     | 37.99 | 37.33 | 36.93 | 37.22 | 34.97 | 35.36 | 31.22 | 32.39 |
| GDE1       | 35.23 | 37.59 | 35.84 | 36.17 | 36.9  | 35.36 | 37.29 | 36.14 |
| SLC39A4    | 35.6  | 36.61 | 37.1  | 32.51 | 38.09 | 35.5  | 27.18 | 31.71 |
| PCYOX1     | 31.25 | 29.57 | 34.78 | 36.52 | 35.26 | 35.52 | 44.91 | 40.32 |
| PEF1       | 34.75 | 34.67 | 32.03 | 30.02 | 34.61 | 35.55 | 28.31 | 28.55 |
| MPZL1      | 36.15 | 37.27 | 35.41 | 38.22 | 36.51 | 35.57 | 37.83 | 37.06 |
| FBR5       | 35.56 | 35.93 | 35.78 | 34.56 | 33.78 | 35.6  | 28.02 | 31.67 |
| CNPPD1     | 33.85 | 35.24 | 31.13 | 31.35 | 38.13 | 35.62 | 28.42 | 30.99 |
| ESYT2      | 32.43 | 29.69 | 33.42 | 34.16 | 36.37 | 35.63 | 40.98 | 37.47 |
| POLE3      | 34.54 | 33.8  | 33.52 | 32.83 | 38.66 | 35.64 | 36.82 | 36.63 |
| MAP1B      | 28.61 | 26.7  | 33.31 | 39.22 | 35.24 | 35.65 | 46.37 | 47.9  |
| CHPF2      | 39.71 | 39.46 | 36.78 | 35.79 | 33.41 | 35.66 | 29.08 | 31.22 |
| GNPDA1     | 31.56 | 32.46 | 33.4  | 32.53 | 39.85 | 35.66 | 39.04 | 38.37 |
| SDHC       | 36.91 | 38.88 | 37.61 | 35.15 | 39.92 | 35.68 | 38.89 | 38.88 |
| SSSCA1     | 36.99 | 38.28 | 37.7  | 30.1  | 36.54 | 35.73 | 28.84 | 31.27 |
| DDX56      | 31.94 | 31.49 | 31.37 | 29.47 | 34.43 | 35.78 | 32.32 | 31.98 |
| GNS        | 31.76 | 34.47 | 33.58 | 32.51 | 34.36 | 35.78 | 39.1  | 37.6  |
| STT3B      | 32.68 | 30.82 | 34.69 | 38.11 | 35.45 | 35.8  | 48.01 | 43.66 |
| AP1B1      | 34.19 | 34.74 | 33.06 | 29.88 | 35.35 | 35.81 | 29.16 | 31.12 |
| DGKA       | 31.33 | 34.87 | 33.31 | 34.9  | 33.37 | 35.81 | 34.93 | 35.27 |
| PEA15      | 37.55 | 38.69 | 34.42 | 36.19 | 38.63 | 35.82 | 34.01 | 37.41 |
| KLF16      | 34.41 | 35.74 | 33.26 | 30.81 | 34.69 | 35.83 | 25.25 | 28.52 |
| ABCA2      | 37.4  | 38.41 | 36.43 | 35.35 | 32.47 | 35.83 | 29.08 | 33.09 |
| MIF4GD     | 36.06 | 37.78 | 35.87 | 32.46 | 34.8  | 35.84 | 32.14 | 32.54 |
| MEX3D      | 37.81 | 34.54 | 35.18 | 32.7  | 31.09 | 35.88 | 24.02 | 25.97 |
| CDKN2AIPNL | 36.58 | 38.86 | 37.44 | 37.32 | 37.88 | 35.89 | 29.58 | 32.21 |
| TMEM43     | 32.73 | 33.66 | 33.33 | 33.14 | 36.52 | 35.89 | 35.9  | 35.85 |
| MSMO1      | 32.1  | 31.32 | 34.46 | 39.19 | 36.36 | 35.89 | 51.29 | 45.54 |
| HARS       | 35.62 | 34.86 | 32.93 | 34.27 | 37.4  | 35.92 | 36.76 | 34.83 |
| TERF2IP    | 36.63 | 37.29 | 38.88 | 37.97 | 39.77 | 35.92 | 37.2  | 36.79 |
| ZNF282     | 36.38 | 36.67 | 34.92 | 32.42 | 35.47 | 35.93 | 27.67 | 28.99 |
| PSENFEN    | 40.48 | 39.16 | 35.84 | 34.7  | 37.48 | 35.94 | 31.14 | 29.21 |
| MOB3A      | 42.67 | 46.95 | 43.83 | 41.3  | 33.92 | 35.94 | 30.94 | 35.29 |
| CYB561A3   | 35.22 | 32.65 | 32.39 | 31.08 | 37.34 | 35.95 | 30.85 | 31.17 |
| VGLL2      | 28.77 | 29.38 | 29.84 | 30.15 | 33.09 | 35.96 | 28.84 | 29.86 |
| BRMS1      | 35.81 | 39.63 | 36.18 | 30.99 | 37.77 | 35.96 | 30.4  | 31.77 |
| PAM        | 36.04 | 35.19 | 37.74 | 38.19 | 35.62 | 35.97 | 42.86 | 39.57 |
| ACTL6A     | 40.79 | 39.13 | 43.18 | 41.62 | 40.67 | 36    | 42.41 | 40.27 |

|          |       |       |       |       |       |       |       |       |
|----------|-------|-------|-------|-------|-------|-------|-------|-------|
| PIDD1    | 31.59 | 28.15 | 30.2  | 29.3  | 37.72 | 36.05 | 36.76 | 34.7  |
| PEX10    | 34.61 | 34.64 | 31.72 | 30.04 | 34.56 | 36.07 | 26.48 | 29.27 |
| HEBP2    | 33.5  | 32.91 | 33.67 | 32.89 | 35.36 | 36.07 | 32.97 | 29.31 |
| INO80B   | 33.85 | 31.46 | 30.29 | 28.39 | 32.86 | 36.07 | 26.95 | 29.68 |
| CYSTM1   | 36.04 | 35.27 | 34.24 | 34.15 | 36.02 | 36.08 | 29.16 | 32.9  |
| TOP1MT   | 33.47 | 35.34 | 32.49 | 32.73 | 36.86 | 36.11 | 32.41 | 36.24 |
| SUPT16H  | 35.84 | 30.87 | 37.83 | 40.96 | 39.21 | 36.12 | 47.32 | 43.38 |
| CLPP     | 33.01 | 30.18 | 32.17 | 27.22 | 36.09 | 36.15 | 23.71 | 27.07 |
| B4GALNT4 | 41.68 | 42.03 | 38.52 | 39.54 | 34.3  | 36.17 | 29.95 | 34.07 |
| NCAPH2   | 38.38 | 37.18 | 35.08 | 31.46 | 34.31 | 36.19 | 26.79 | 28.03 |
| DVL3     | 36.41 | 34.74 | 34.39 | 35.3  | 36.92 | 36.2  | 34.26 | 36.7  |
| CDC42SE1 | 34.01 | 36.25 | 36.58 | 35.37 | 38.33 | 36.25 | 39.01 | 39.57 |
| CNOT1    | 35.5  | 32.96 | 37.71 | 37.92 | 35.99 | 36.25 | 44.82 | 40.38 |
| GAGE12B  | 37.78 | 43.43 | 46.64 | 38.89 | 49.29 | 36.33 | 37.65 | 46.89 |
| MRPL14   | 30.29 | 33.21 | 30.38 | 27.86 | 33.29 | 36.35 | 28.26 | 29.97 |
| COL4A1   | 37.29 | 38.01 | 36.92 | 39.54 | 34.89 | 36.39 | 36.21 | 36.72 |
| AGR2     | 36.48 | 37.06 | 35.64 | 40.91 | 33.28 | 36.41 | 41.81 | 41.65 |
| RBM3     | 38.89 | 33.77 | 39.19 | 36.63 | 40.92 | 36.42 | 39.8  | 34.26 |
| RRP9     | 34.18 | 34.5  | 33.91 | 30.31 | 40.11 | 36.43 | 28.8  | 33.51 |
| USP10    | 36.62 | 37.57 | 38.06 | 37.89 | 36.32 | 36.43 | 40    | 37.93 |
| CCZ1     | 34.75 | 32.57 | 31.06 | 38.05 | 36.75 | 36.47 | 42.19 | 37.73 |
| CARS     | 41.66 | 41.82 | 40.35 | 39.48 | 43.47 | 36.49 | 38.91 | 41.1  |
| HN1L     | 36.76 | 36.32 | 35.15 | 34.05 | 36.75 | 36.5  | 37.06 | 35.78 |
| KNOP1    | 39.4  | 40.76 | 37.38 | 37.43 | 37.99 | 36.54 | 34.27 | 36.95 |
| TOR4A    | 39.85 | 40.94 | 39.13 | 35.22 | 34.98 | 36.56 | 25.95 | 28.4  |
| TOB1     | 30.06 | 30.36 | 33.45 | 33.82 | 38.48 | 36.56 | 43.57 | 43.58 |
| ICAM4    | 42.78 | 44.77 | 39.43 | 35.27 | 32.59 | 36.58 | 25.95 | 31.22 |
| SNRNP40  | 37.36 | 36.89 | 36.83 | 35.57 | 38.05 | 36.59 | 32.84 | 32.6  |
| ZDHHC8   | 33.14 | 32.98 | 31.5  | 29.28 | 31.39 | 36.65 | 28.17 | 30.21 |
| PCCB     | 31.72 | 31.21 | 29.93 | 30.3  | 37.51 | 36.65 | 33.2  | 35.3  |
| LRFN4    | 32.13 | 31.08 | 29.25 | 28.02 | 33.56 | 36.66 | 26.82 | 28.66 |
| SLITRK6  | 40.85 | 38.8  | 47.66 | 57.68 | 35.7  | 36.66 | 63.73 | 57.05 |
| ERRF1    | 39.26 | 38.05 | 40.94 | 43.45 | 36.9  | 36.67 | 43.9  | 39.17 |
| ACP1     | 32.6  | 30.91 | 33.3  | 33.56 | 38.09 | 36.74 | 45.91 | 41.48 |
| GCN1     | 35.16 | 34.97 | 33.38 | 33.83 | 35.69 | 36.77 | 32.65 | 35.11 |
| GGT7     | 33.45 | 36.56 | 33.51 | 36.46 | 34.57 | 36.84 | 34.14 | 36.94 |
| SLC41A3  | 30.18 | 29.38 | 29.81 | 28.5  | 35.53 | 36.89 | 32.93 | 33.51 |
| C5orf38  | 42.24 | 39.62 | 42.09 | 37.53 | 36.68 | 36.9  | 25.79 | 29.1  |
| HAS3     | 35.77 | 34.16 | 35.73 | 36.03 | 37.48 | 36.9  | 36.13 | 33.89 |
| PSIP1    | 38.59 | 34.85 | 40.91 | 43.07 | 38.78 | 36.91 | 51.38 | 47.44 |
| EVA1B    | 37.01 | 39.65 | 34.81 | 32.31 | 33.45 | 36.92 | 25.11 | 29.6  |
| ARHGAP1  | 41.47 | 42.12 | 38.63 | 37.8  | 35.16 | 36.97 | 31.6  | 34.53 |
| PANK2    | 39.2  | 37.42 | 40.38 | 35.17 | 33.72 | 36.98 | 37.13 | 38.9  |
| GNA15    | 33.85 | 33.55 | 34.14 | 29.46 | 36.13 | 36.99 | 29.04 | 31.08 |
| POLR2H   | 31.45 | 30.81 | 32.54 | 30.55 | 35.11 | 37    | 34    | 34.08 |
| FAT1     | 34.42 | 34.55 | 37.06 | 41.02 | 36.99 | 37.01 | 46.68 | 43.25 |
| TPBG     | 36.58 | 35.63 | 36.13 | 39.07 | 35.71 | 37.02 | 37.15 | 35.85 |
| PMPCA    | 33.13 | 34.87 | 33.67 | 30.44 | 37.36 | 37.06 | 32.23 | 32.81 |
| AKAP1    | 33.19 | 32.45 | 32.81 | 33.13 | 37.24 | 37.08 | 37.26 | 36.35 |
| DEGS1    | 35.48 | 36.9  | 35.34 | 37.18 | 38.06 | 37.1  | 41.65 | 37.91 |
| METTL23  | 34.16 | 35.23 | 36.22 | 34.57 | 35.7  | 37.16 | 35.87 | 33.09 |
| BRD4     | 39.63 | 39.76 | 38.28 | 40.12 | 35.71 | 37.17 | 32.52 | 35.87 |
| MRPL40   | 36.77 | 38.6  | 39.46 | 39.09 | 36.84 | 37.17 | 37.42 | 36.72 |
| MYO9B    | 34.9  | 35.1  | 34.56 | 34.35 | 35.09 | 37.2  | 31.28 | 33.3  |
| TRADD    | 39.86 | 38.15 | 33.43 | 34.26 | 32.21 | 37.21 | 26.33 | 29.58 |
| LAP3     | 41.97 | 39.66 | 43.25 | 42.47 | 39.46 | 37.21 | 42.39 | 36.25 |
| MRPS2    | 35.05 | 33.33 | 32.62 | 29.57 | 36.07 | 37.22 | 28.78 | 30.67 |
| DYNLT1   | 38.37 | 40.01 | 38.16 | 42.19 | 42.76 | 37.23 | 38.4  | 35.84 |
| NANS     | 41.3  | 42.52 | 36.38 | 36.18 | 38.41 | 37.25 | 33.16 | 33.07 |
| GORASP2  | 37.79 | 41.82 | 39.75 | 39.93 | 39.62 | 37.26 | 38.32 | 38.97 |
| SLC25A11 | 35.63 | 36.22 | 34.24 | 31.68 | 36.14 | 37.27 | 28.28 | 29.77 |
| DCAF15   | 35.87 | 37.2  | 33.48 | 32.47 | 33.05 | 37.27 | 27.68 | 29.88 |
| CHST2    | 45.34 | 41.95 | 43.47 | 39.9  | 33.66 | 37.28 | 29.07 | 29.45 |
| RETSAT   | 28.25 | 29.1  | 28.18 | 28.79 | 37.73 | 37.29 | 33.91 | 36.51 |
| H2AFV    | 46.68 | 47.23 | 45.7  | 46.62 | 39.55 | 37.3  | 38.99 | 38.01 |
| ZDHHC4   | 38.27 | 38.33 | 36.61 | 36.68 | 39.82 | 37.31 | 36.44 | 35.93 |
| DPYSL2   | 35.99 | 38.23 | 38.15 | 40.09 | 35.92 | 37.34 | 37.47 | 40.66 |
| BECN1    | 36.61 | 33.12 | 37.42 | 39.27 | 42.65 | 37.34 | 45.18 | 42.37 |
| E2F4     | 36.68 | 32.92 | 35.1  | 32.87 | 37.48 | 37.36 | 34.89 | 34.9  |
| CD2BP2   | 39.36 | 39.97 | 39.98 | 37.88 | 39.12 | 37.36 | 34.29 | 37.24 |
| EXT2     | 38.77 | 41.3  | 39.27 | 38.72 | 37.73 | 37.41 | 36.99 | 39.46 |
| PRR7     | 39.36 | 37.27 | 34.39 | 31.36 | 32.33 | 37.42 | 22.35 | 26.36 |
| FBXO44   | 33.01 | 35.95 | 34.72 | 33.48 | 40.95 | 37.47 | 34.89 | 37.89 |
| SMARCD1  | 35.56 | 40.59 | 39.99 | 37.72 | 35.24 | 37.48 | 35.19 | 35.03 |
| TMUB2    | 32.47 | 34.49 | 31.93 | 32.92 | 36.78 | 37.48 | 34.6  | 35.93 |
| RSL1D1   | 32.22 | 30.92 | 35.01 | 37.28 | 39.28 | 37.48 | 47.51 | 42.66 |
| BRD2     | 41.58 | 41.78 | 40.97 | 43.64 | 39.64 | 37.51 | 39.38 | 41.64 |
| ATP8B2   | 36    | 34.85 | 35.46 | 36.26 | 36.47 | 37.54 | 34.47 | 37.45 |
| DPP3     | 37.26 | 38.76 | 35.97 | 34.02 | 36.92 | 37.55 | 27.78 | 30.93 |
| SLC35B1  | 34.13 | 35.51 | 35.12 | 35.39 | 39.03 | 37.55 | 35.99 | 37.32 |
| SERP1    | 38.65 | 38.2  | 39.87 | 38.44 | 38.34 | 37.55 | 39.78 | 40.97 |
| TMED10   | 36.68 | 35.11 | 39.59 | 43.15 | 37.56 | 37.55 | 47.1  | 42.47 |
| ANXA6    | 46.57 | 51.82 | 46.99 | 44.75 | 39.38 | 37.59 | 36.05 | 34.84 |
| MID1IP1  | 29.68 | 31.7  | 27.92 | 31.5  | 34.89 | 37.6  | 29.27 | 35.24 |
| ATAD3A   | 32.36 | 31.65 | 30.54 | 28.18 | 37.07 | 37.63 | 28.49 | 30.93 |
| PSMA3    | 37.17 | 35.98 | 36.72 | 41.09 | 38.88 | 37.64 | 49.27 | 39.81 |
| CLIC4    | 34.24 | 30.17 | 38.12 | 42.83 | 38.99 | 37.64 | 55.15 | 46.87 |

|          |       |       |       |       |       |       |       |       |
|----------|-------|-------|-------|-------|-------|-------|-------|-------|
| PTPRA    | 39.07 | 36.59 | 37.86 | 39.31 | 38.66 | 37.67 | 39.98 | 38.22 |
| ACSS2    | 31.33 | 35.47 | 30.33 | 32.45 | 36.19 | 37.67 | 35.55 | 39.34 |
| STK17A   | 37.18 | 34.66 | 41.55 | 43.32 | 43.55 | 37.68 | 58.03 | 48.29 |
| UBE2J2   | 35.29 | 35.52 | 32.61 | 32.06 | 37.87 | 37.73 | 30.53 | 32.64 |
| CRELD2   | 35.67 | 36.64 | 33.15 | 31.56 | 34.13 | 37.75 | 29.45 | 30.44 |
| SLC38A10 | 38.16 | 39.14 | 37.55 | 36.54 | 33.86 | 37.75 | 30.86 | 33.85 |
| TMEM14B  | 38.43 | 40.38 | 35.09 | 36.04 | 40.03 | 37.75 | 35.84 | 34.2  |
| BAIAP2L1 | 38.39 | 37.91 | 39.28 | 38.04 | 38.92 | 37.76 | 39.94 | 39.06 |
| KEAP1    | 39.52 | 39.28 | 36.28 | 34.72 | 35.61 | 37.85 | 30.43 | 31.15 |
| DPM3     | 44.48 | 40.25 | 41.49 | 35.57 | 42.69 | 37.88 | 22.99 | 27    |
| ZNF580   | 44.73 | 45.24 | 40.7  | 39.87 | 33.62 | 37.91 | 27.86 | 29.26 |
| SRPX     | 37.62 | 36.52 | 38.56 | 37.05 | 35.92 | 37.93 | 30.4  | 34.05 |
| PLEKHB2  | 37.85 | 36.99 | 37.93 | 37.39 | 39.23 | 37.99 | 42.87 | 41.04 |
| TEX264   | 38.29 | 37.96 | 38.88 | 35.63 | 37.97 | 38    | 29.48 | 32.67 |
| TRAPPC3  | 38.37 | 37.63 | 37.3  | 37.76 | 40.21 | 38.02 | 36.29 | 36.55 |
| STXBP2   | 41.12 | 41.49 | 37.81 | 36.87 | 37.59 | 38.03 | 32.13 | 37.76 |
| PTK7     | 40.42 | 42.02 | 39.64 | 38.49 | 37.44 | 38.05 | 32.15 | 35.33 |
| SF3B3    | 37.91 | 40.56 | 38.59 | 37.63 | 39.24 | 38.05 | 37.71 | 37.07 |
| SCARA3   | 44.45 | 46.34 | 45.54 | 43.04 | 37.05 | 38.06 | 32.09 | 35.48 |
| TCIRG1   | 29.44 | 30.15 | 29.9  | 31.1  | 36.41 | 38.09 | 35.37 | 38.17 |
| WDR74    | 35.71 | 36.23 | 36.19 | 32.05 | 39.06 | 38.15 | 30.23 | 35.78 |
| TCOF1    | 40.59 | 39    | 37.43 | 36.91 | 41.44 | 38.15 | 34.8  | 37.22 |
| MED24    | 38.7  | 36.15 | 36.09 | 35.79 | 38.38 | 38.18 | 34.38 | 36.01 |
| THRAP3   | 36.86 | 34.75 | 38.73 | 41.01 | 39.37 | 38.19 | 44.21 | 43.51 |
| COQ9     | 36.54 | 35.51 | 33.72 | 33.62 | 37.39 | 38.2  | 35.07 | 37.15 |
| DYNLL2   | 44.61 | 45.54 | 44.34 | 47.25 | 40.33 | 38.2  | 35.16 | 39.16 |
| CHMP5    | 37.34 | 39.36 | 38.8  | 41.6  | 41.94 | 38.21 | 50.05 | 45.38 |
| STYXL1   | 44.44 | 45.25 | 44.97 | 42.27 | 38.46 | 38.22 | 39.2  | 38.22 |
| TNFAIP2  | 45.92 | 43.8  | 44.78 | 43.17 | 38.48 | 38.23 | 38.38 | 38.09 |
| RCC1L    | 36.05 | 37.51 | 34.99 | 34.45 | 38.44 | 38.26 | 29.57 | 33.83 |
| GALNT18  | 38.67 | 38.89 | 38.03 | 36.17 | 36.92 | 38.28 | 34.89 | 35.9  |
| HSPB11   | 43.14 | 41.42 | 40.98 | 41.38 | 34.11 | 38.28 | 44.84 | 41.8  |
| ATG9A    | 34.95 | 36.66 | 35    | 33.58 | 35.48 | 38.29 | 33.44 | 34.56 |
| MRPL52   | 37.3  | 38.18 | 36.26 | 32.32 | 36.54 | 38.3  | 31.61 | 32.38 |
| DTYMK    | 36.36 | 35.91 | 35.2  | 32.81 | 38.32 | 38.3  | 30.29 | 33.8  |
| ACSL4    | 33.73 | 34.43 | 38.72 | 44.64 | 37.52 | 38.34 | 55.13 | 52.59 |
| EID1     | 35.86 | 33.69 | 40    | 42.29 | 42.06 | 38.38 | 52.56 | 44.32 |
| POLRMT   | 35.14 | 32.86 | 32.2  | 30.87 | 35.74 | 38.41 | 27.2  | 29.67 |
| RRP36    | 35.65 | 38.05 | 36.91 | 37.63 | 41    | 38.41 | 38.26 | 38.86 |
| ANXA8    | 34.59 | 36.45 | 36.94 | 30.4  | 45.35 | 38.41 | 39.69 | 40.8  |
| SLC9A3R2 | 38.87 | 37.85 | 35.3  | 33.95 | 37.11 | 38.42 | 30.06 | 32.14 |
| EXOC3    | 36.36 | 35.89 | 36.47 | 34.16 | 37.18 | 38.42 | 36.8  | 37.91 |
| CNPY3    | 39.46 | 41.06 | 39.29 | 35.65 | 36.42 | 38.45 | 30.38 | 33.06 |
| PLXNB1   | 40.52 | 39.73 | 39.03 | 38.33 | 34.78 | 38.46 | 34.36 | 37.12 |
| UBE2D3   | 36.45 | 36.86 | 41.99 | 39.54 | 41.98 | 38.46 | 46.52 | 43.83 |
| HUWE1    | 37.64 | 37.5  | 38.08 | 39.72 | 37.41 | 38.47 | 39.87 | 41.35 |
| NDUFS4   | 43.93 | 46.63 | 44.34 | 43.5  | 43.98 | 38.47 | 57.29 | 50.95 |
| CNDP2    | 40.62 | 41.11 | 38.12 | 40.19 | 40.01 | 38.48 | 37.49 | 36.82 |
| SUCLG1   | 32.27 | 32.14 | 30.6  | 29.63 | 37.5  | 38.52 | 37.4  | 35.8  |
| LPCAT3   | 36.3  | 39.48 | 35.16 | 36.74 | 37.35 | 38.52 | 37.04 | 39.4  |
| DAB2IP   | 38.91 | 40.21 | 37.48 | 37.23 | 37.21 | 38.53 | 32.56 | 34.05 |
| CDIP1    | 32.19 | 33.92 | 31.67 | 29.16 | 39.41 | 38.55 | 32.39 | 33.56 |
| CLIP2    | 42.19 | 45.25 | 41.23 | 37.96 | 36.27 | 38.55 | 31.13 | 34.12 |
| MAT2B    | 36.14 | 35.17 | 40.93 | 39.85 | 42.36 | 38.55 | 53.3  | 45.91 |
| BCL7B    | 36.18 | 38.2  | 35.35 | 35.98 | 36.95 | 38.56 | 35.81 | 36.15 |
| MPV17    | 33.76 | 34.95 | 32.74 | 33.13 | 38.51 | 38.6  | 35.42 | 35.85 |
| AZIN1    | 36.07 | 35    | 37.88 | 40.5  | 39.44 | 38.6  | 47.7  | 44.96 |
| CLN3     | 33.7  | 36.33 | 34.72 | 30.21 | 37.79 | 38.63 | 33.18 | 31.55 |
| PACS1    | 40.24 | 40.98 | 37.95 | 40.55 | 38.25 | 38.64 | 33.78 | 38.17 |
| CUX1     | 41.63 | 42.02 | 41.24 | 39.22 | 37.38 | 38.67 | 32.78 | 36.46 |
| USB1     | 34.56 | 37.64 | 34.74 | 36.04 | 38.52 | 38.67 | 35.57 | 41.03 |
| NPTN     | 37.76 | 36.19 | 39.84 | 42.35 | 39.98 | 38.7  | 46.1  | 45.8  |
| XPO6     | 36.15 | 36.22 | 36.52 | 36.93 | 38.43 | 38.71 | 38.25 | 38.08 |
| TOMM22   | 37.65 | 38.96 | 34.61 | 33.63 | 41.88 | 38.71 | 35.39 | 39.22 |
| NAT9     | 30.64 | 31.25 | 30.45 | 29.15 | 37.86 | 38.74 | 36.66 | 34.05 |
| TXN2     | 37.64 | 39.67 | 34.36 | 36.14 | 40.49 | 38.74 | 32.72 | 35.16 |
| VPS72    | 43.51 | 45.71 | 42.47 | 43.33 | 42.07 | 38.74 | 37.3  | 35.65 |
| PCMT1    | 34.93 | 37.35 | 38.28 | 36.56 | 39.68 | 38.77 | 45.73 | 41.45 |
| RGS3     | 37.4  | 40.32 | 36.01 | 34.1  | 39.04 | 38.79 | 32.91 | 33.13 |
| PPP1CC   | 37.21 | 33.95 | 39.34 | 39.84 | 39.91 | 38.83 | 50.03 | 43.21 |
| IPO7     | 30.59 | 26.92 | 35.52 | 39.51 | 41.43 | 38.83 | 60.04 | 50.92 |
| CDV3     | 34.85 | 33.58 | 36.63 | 42.06 | 40.82 | 38.84 | 47.65 | 43.9  |
| LGMN     | 39.49 | 41.24 | 40.37 | 41.52 | 38.4  | 38.87 | 38.67 | 39.23 |
| TMEM50A  | 43.56 | 43.27 | 44.56 | 48.26 | 43.22 | 38.91 | 45.76 | 43.46 |
| NAT14    | 41.47 | 43.83 | 40.58 | 37.18 | 37.87 | 38.93 | 27.49 | 33.51 |
| FUCA1    | 42.61 | 42.36 | 43.97 | 42.93 | 39.65 | 38.93 | 39.34 | 39.39 |
| MRPL10   | 36.38 | 40.4  | 36.48 | 35.81 | 38.76 | 38.94 | 34.23 | 35.72 |
| SRSF11   | 35.78 | 35.31 | 40.38 | 47.93 | 40.2  | 38.95 | 66.36 | 57.33 |
| BCKDHA   | 42.32 | 41.44 | 39.5  | 36.25 | 39.36 | 38.96 | 30.06 | 34.11 |
| CSK      | 36.55 | 35.68 | 35.69 | 35.55 | 37.96 | 38.97 | 30.71 | 35.5  |
| DHX15    | 37.28 | 34.04 | 39.59 | 44.34 | 40.32 | 38.99 | 54.56 | 49.46 |
| SERPINB5 | 27.87 | 25.98 | 30.19 | 31.51 | 40.88 | 39    | 47.36 | 43.02 |
| RBX1     | 40.29 | 40.23 | 41.34 | 37.48 | 37.63 | 39.05 | 41.11 | 36.04 |
| AP3S1    | 37.97 | 39.24 | 37.59 | 39.04 | 41.94 | 39.05 | 52.73 | 46.64 |
| NOL7     | 32.74 | 35.4  | 40.42 | 38.61 | 40.63 | 39.09 | 41.49 | 37.59 |
| KLHL21   | 38.96 | 39.28 | 36.56 | 34.78 | 38.75 | 39.1  | 31.61 | 34.64 |
| ARHGDI8  | 32.85 | 33.05 | 34.84 | 36.01 | 41.02 | 39.1  | 37.03 | 37.14 |
| GALNT10  | 37.46 | 39.73 | 39.18 | 40.4  | 41.01 | 39.1  | 41.24 | 39.73 |

|          |       |       |       |       |       |       |       |       |
|----------|-------|-------|-------|-------|-------|-------|-------|-------|
| UBA2     | 33.62 | 33.03 | 37.66 | 40.25 | 41.66 | 39.1  | 50.65 | 44.02 |
| MTRNR2L1 | 35.15 | 37.01 | 38.74 | 41.32 | 37.18 | 39.14 | 41.33 | 44.46 |
| NPPC     | 32.55 | 33.27 | 27.98 | 26.88 | 26.46 | 39.18 | 20.78 | 32.16 |
| WDR18    | 40.87 | 38.44 | 36.22 | 31.65 | 35.66 | 39.21 | 24.86 | 28.26 |
| P4HA2    | 44.56 | 48.3  | 42.25 | 41.31 | 38.33 | 39.21 | 38.07 | 38.64 |
| DLST     | 39.72 | 40.78 | 40.52 | 38.4  | 40.82 | 39.21 | 40.14 | 41.24 |
| NISCH    | 39.69 | 39.47 | 39.76 | 40.47 | 39.04 | 39.22 | 42.39 | 40.84 |
| ZFPL1    | 45.15 | 44.67 | 42.49 | 39.8  | 38.78 | 39.24 | 33.55 | 34.06 |
| PTP4A1   | 33.76 | 35.09 | 36.56 | 39.45 | 41.06 | 39.24 | 46.72 | 46.06 |
| NUP62    | 40.98 | 41.02 | 40.89 | 40.58 | 38.75 | 39.25 | 33.08 | 36.01 |
| BSCL2    | 41.6  | 39.49 | 41.05 | 39.8  | 36.68 | 39.26 | 32.41 | 34.81 |
| YTHDF2   | 40.3  | 37.8  | 42.03 | 41.1  | 40.13 | 39.27 | 45.08 | 40.15 |
| CNIH4    | 39.03 | 41.26 | 38.33 | 39.03 | 39.8  | 39.27 | 42.37 | 42.85 |
| CARD10   | 40.05 | 41.28 | 39.24 | 37.2  | 38.53 | 39.28 | 33.36 | 32.73 |
| TBCD     | 37.69 | 38.75 | 36.63 | 35.04 | 38.81 | 39.31 | 33.98 | 36.14 |
| ACY1     | 32.07 | 34.41 | 32.73 | 27.88 | 36.5  | 39.32 | 27.41 | 30.06 |
| FURIN    | 41.44 | 41.83 | 39.88 | 38.25 | 36.66 | 39.33 | 29.13 | 33.6  |
| RPP21    | 43.4  | 43.59 | 39.65 | 36.39 | 37.67 | 39.34 | 30.12 | 31.88 |
| MAP1S    | 42.03 | 44.32 | 40.33 | 36.88 | 37.59 | 39.4  | 27.03 | 31.58 |
| STRN4    | 41.52 | 40.56 | 39.26 | 37.32 | 38.97 | 39.4  | 33.49 | 34.92 |
| NDUFA12  | 39.28 | 43.46 | 37.05 | 42.03 | 40.63 | 39.4  | 43.15 | 43.44 |
| RUVBL2   | 39.58 | 40.51 | 36.95 | 33.04 | 39.6  | 39.42 | 29.65 | 31.6  |
| SCYL1    | 39.08 | 37.7  | 37.15 | 35.5  | 38.52 | 39.42 | 31.61 | 33.16 |
| NCOA4    | 37.04 | 33.52 | 37.42 | 37.73 | 40.89 | 39.42 | 43.48 | 40.48 |
| SUPT4H1  | 39.15 | 42.86 | 40.95 | 39.01 | 42.86 | 39.43 | 39.99 | 39.16 |
| AATF     | 40.94 | 41.54 | 44.64 | 40.27 | 45.31 | 39.46 | 41.12 | 39.77 |
| FUBP1    | 44.1  | 41.37 | 44.09 | 45.33 | 41.67 | 39.47 | 48.14 | 43.29 |
| CTDSP1   | 45.15 | 46.11 | 43.28 | 45.62 | 39.86 | 39.48 | 32.77 | 36.1  |
| FAM83G   | 36.85 | 36.78 | 35.47 | 33.17 | 37.18 | 39.49 | 29.02 | 32.18 |
| SART1    | 41.86 | 41.45 | 40.06 | 37.36 | 40.53 | 39.52 | 31.34 | 33.14 |
| SLC35A4  | 40.78 | 40.02 | 39.84 | 38.4  | 39.95 | 39.52 | 35.48 | 37.66 |
| NUDT1    | 36.75 | 37.25 | 35.6  | 33.36 | 40.07 | 39.56 | 31.09 | 30.15 |
| UNC93B1  | 43.42 | 41.93 | 41.08 | 38.49 | 37.62 | 39.56 | 26    | 32.51 |
| RFC2     | 44.01 | 43.32 | 42.27 | 37.42 | 39.56 | 39.57 | 39.83 | 33.91 |
| B4GALT7  | 39.11 | 38.67 | 37.45 | 35.66 | 37.26 | 39.57 | 29.28 | 33.95 |
| GLUD1    | 35.76 | 34.57 | 35.48 | 33.46 | 40.42 | 39.57 | 39.04 | 37.4  |
| LARS     | 33.55 | 32.13 | 36    | 36.64 | 41.79 | 39.69 | 51.06 | 44.89 |
| CLTB     | 44    | 44.38 | 40.32 | 36.88 | 39.57 | 39.73 | 28.47 | 32.86 |
| PSMB2    | 37.92 | 38.56 | 37.78 | 37.94 | 41.24 | 39.73 | 38.69 | 38.72 |
| YWHAH    | 43.59 | 43.1  | 40.93 | 41.56 | 42.4  | 39.77 | 38.31 | 40.85 |
| GSDMD    | 44.46 | 44    | 40.23 | 39.73 | 37    | 39.81 | 29.39 | 32.5  |
| RNF40    | 41.41 | 42.76 | 40.75 | 38.25 | 39.31 | 39.81 | 33.58 | 35.8  |
| LAGE3    | 41.61 | 40.51 | 37.66 | 33.81 | 38.6  | 39.83 | 29.16 | 29.1  |
| RAP1B    | 40.37 | 39.03 | 44.05 | 45.98 | 44.23 | 39.87 | 58.41 | 51.89 |
| POLD4    | 36.77 | 39.43 | 37.93 | 35.02 | 36.44 | 39.9  | 32.62 | 34.32 |
| MTCH2    | 36.18 | 37.6  | 36.83 | 37.06 | 43.01 | 39.9  | 41.81 | 43.02 |
| ZDHHC5   | 36.27 | 38.6  | 36.19 | 35.43 | 38.79 | 39.92 | 39.53 | 39.34 |
| CHCHD3   | 31.2  | 31.7  | 34.73 | 35.94 | 41.38 | 39.93 | 42.36 | 42.72 |
| PRMT2    | 41.43 | 40.9  | 40.7  | 41.73 | 38.44 | 39.96 | 37.59 | 39.1  |
| SLC22A18 | 46.1  | 45.67 | 40.22 | 38.87 | 37.17 | 40    | 27.48 | 34.41 |
| LMAN1    | 35.64 | 34.16 | 42.75 | 49.72 | 40.64 | 40.03 | 69.26 | 59.48 |
| CKS2     | 32.04 | 34.74 | 29.41 | 28.56 | 38.11 | 40.07 | 45.25 | 43.2  |
| POLR2I   | 39.08 | 42.25 | 34.69 | 36.65 | 37.13 | 40.1  | 30.02 | 28.81 |
| EBPL     | 39.74 | 39.02 | 38.08 | 36.81 | 38.52 | 40.11 | 35.48 | 37.39 |
| FGFR2    | 41.94 | 40.37 | 43.12 | 43.76 | 38.21 | 40.11 | 39.05 | 37.83 |
| CORO1C   | 38.29 | 38.11 | 39.62 | 41.12 | 41.5  | 40.13 | 43.68 | 42.51 |
| TKFC     | 45.33 | 43.32 | 39.33 | 37.9  | 38.15 | 40.22 | 31.45 | 33.65 |
| ITPR3    | 36.91 | 36.01 | 36.82 | 35    | 38.98 | 40.22 | 34.96 | 37.93 |
| NARF     | 44.85 | 45.32 | 44.97 | 40.82 | 39    | 40.23 | 37.38 | 38.77 |
| TMEM134  | 41.13 | 42.89 | 43.89 | 41.19 | 35.97 | 40.29 | 30.43 | 33.84 |
| ACSL3    | 36.44 | 34.75 | 40.98 | 48.55 | 41.33 | 40.3  | 63.46 | 54.2  |
| NDST1    | 35.84 | 33.83 | 34.67 | 35.22 | 40.29 | 40.31 | 37.76 | 38.81 |
| MRPL11   | 35.8  | 34.28 | 34.03 | 33.56 | 39.6  | 40.36 | 33.59 | 34.02 |
| ACAA1    | 41.45 | 43.95 | 38.95 | 35.52 | 39.63 | 40.36 | 34.11 | 35.21 |
| SMARCC1  | 39.75 | 39.11 | 40.97 | 41.81 | 41.99 | 40.38 | 42    | 42.74 |
| ANAPC13  | 35.97 | 36.53 | 37.77 | 36.11 | 41.04 | 40.42 | 49.58 | 45.87 |
| IGF2BP2  | 42.81 | 44.67 | 46.25 | 49.9  | 43.14 | 40.46 | 49.4  | 47.66 |
| HNRNPR   | 42.45 | 39.5  | 44.41 | 49.02 | 42.19 | 40.5  | 53.99 | 48.99 |
| CALM1    | 42.36 | 40.58 | 43.29 | 43.28 | 40.39 | 40.51 | 45.04 | 42.07 |
| PFDN6    | 40    | 39.87 | 37.89 | 41.73 | 44.04 | 40.52 | 37.24 | 42.45 |
| TMEM160  | 44.08 | 39.58 | 36.83 | 31.69 | 39.31 | 40.53 | 25.16 | 29.73 |
| TUSC3    | 40.82 | 41.03 | 41.91 | 46.84 | 42.9  | 40.55 | 53.51 | 51.44 |
| FBXO2    | 35.63 | 36.38 | 34.21 | 30.5  | 41.21 | 40.56 | 29.76 | 34.71 |
| COX17    | 39.91 | 36.22 | 36.72 | 39.68 | 44.04 | 40.57 | 46.7  | 41.58 |
| TYK2     | 40.26 | 37.34 | 37.31 | 35.85 | 36.84 | 40.58 | 32.94 | 36.43 |
| BCL7C    | 39.59 | 43.36 | 38.31 | 36.59 | 39.96 | 40.65 | 30.91 | 29.13 |
| UBQLN4   | 42.68 | 41.86 | 39.36 | 38.1  | 41.05 | 40.67 | 33.98 | 39.2  |
| UBE2Q1   | 38.49 | 41.84 | 39.51 | 40.8  | 43.76 | 40.67 | 41.54 | 42.87 |
| PLBD2    | 38.17 | 38.85 | 36.77 | 37.64 | 38.76 | 40.72 | 34.51 | 37.49 |
| SNAPIN   | 41.39 | 44.58 | 43.54 | 39.66 | 38.41 | 40.74 | 34.46 | 35.99 |
| SRRT     | 39.41 | 37.05 | 38.35 | 39.92 | 42.43 | 40.77 | 41.9  | 39.69 |
| SOLE     | 36.61 | 35.56 | 38.11 | 37.82 | 39.86 | 40.78 | 44.87 | 43.19 |
| ZFP36L1  | 51.39 | 51.96 | 50.96 | 52.56 | 41.52 | 40.84 | 38.98 | 46.17 |
| NDUFB1   | 37.81 | 36.89 | 32.76 | 34.71 | 38.61 | 40.9  | 35.5  | 32.63 |
| LRRC41   | 44.12 | 47.33 | 42.98 | 41.08 | 41.26 | 40.94 | 34.9  | 38.99 |
| PRELID3B | 36.41 | 34.5  | 39.01 | 44.82 | 42.85 | 40.94 | 66.95 | 58.28 |
| NOLC1    | 34.66 | 32.95 | 34.56 | 37.5  | 43.11 | 40.98 | 43.94 | 43.72 |
| MARS     | 41.38 | 41.58 | 39.52 | 38.03 | 40.66 | 40.99 | 36.98 | 37.44 |

|           |       |       |       |       |       |       |       |       |
|-----------|-------|-------|-------|-------|-------|-------|-------|-------|
| PPIH      | 39.71 | 37.71 | 38.61 | 38.8  | 40.29 | 41.03 | 39.13 | 38.4  |
| PODXL     | 45.51 | 47.79 | 47.55 | 49.81 | 42.26 | 41.04 | 46.01 | 45.58 |
| MCM2      | 47.22 | 44.54 | 44.87 | 40.05 | 39.58 | 41.05 | 33.35 | 33.23 |
| ABHD14B   | 38.67 | 41.3  | 37.67 | 36.06 | 41.97 | 41.06 | 35.23 | 36.51 |
| EIF2D     | 39.99 | 39.57 | 38.42 | 36.25 | 43.19 | 41.06 | 42.01 | 41.6  |
| GBAS      | 44.03 | 40.3  | 47.87 | 48.11 | 41.75 | 41.06 | 52.38 | 47.82 |
| CIZ1      | 42.36 | 43.13 | 41.55 | 40.42 | 38.55 | 41.07 | 33.71 | 37.58 |
| TMEM120A  | 34.72 | 39.44 | 37.89 | 37.8  | 41.34 | 41.09 | 35.05 | 39.45 |
| TMEM179B  | 46.67 | 50.42 | 43.98 | 42.8  | 44.57 | 41.09 | 39.79 | 40.61 |
| GNPTG     | 38.69 | 39.32 | 37.35 | 38.01 | 42.65 | 41.1  | 35.52 | 39.75 |
| SNRPN     | 44.25 | 44.44 | 43.02 | 42.11 | 39.3  | 41.12 | 35.06 | 36.33 |
| SNURF     | 44.25 | 44.44 | 43.02 | 42.76 | 39.98 | 41.12 | 35.06 | 37.23 |
| OTUD5     | 40.41 | 43.21 | 41.46 | 40.14 | 42.41 | 41.13 | 36.74 | 38.05 |
| VASP      | 41.68 | 42.18 | 38.8  | 36.77 | 40.52 | 41.14 | 32.68 | 36.22 |
| KIAA0319L | 43.92 | 45.7  | 42.41 | 44.31 | 40.16 | 41.15 | 41.34 | 42.93 |
| BLVRA     | 40.88 | 41.38 | 42.02 | 39.74 | 39.82 | 41.16 | 40.21 | 43.22 |
| COP37A    | 41.07 | 43.06 | 37.44 | 37.85 | 44.11 | 41.18 | 37.23 | 39.22 |
| NELFB     | 41.39 | 40.07 | 41.2  | 35.23 | 41.86 | 41.2  | 33.99 | 35.13 |
| INTS1     | 40.77 | 39.15 | 38.74 | 35.67 | 38.71 | 41.26 | 31.6  | 34.02 |
| SELO      | 34.95 | 34.8  | 34.05 | 32.64 | 37.15 | 41.29 | 27.61 | 32.17 |
| HNRNPUL2  | 44.38 | 45.86 | 46.42 | 44.79 | 41.63 | 41.29 | 41.35 | 42.17 |
| IMP3      | 38.33 | 38.69 | 39.37 | 34.49 | 40.58 | 41.3  | 34.16 | 36.79 |
| CERCAM    | 43.37 | 44.84 | 42.71 | 39.99 | 34.86 | 41.33 | 30.33 | 33.03 |
| ANP32A    | 42.6  | 40.68 | 43.4  | 44.55 | 43.47 | 41.33 | 48.06 | 47.22 |
| GSR       | 39.9  | 39.33 | 39.06 | 37.61 | 43.31 | 41.34 | 44.68 | 43.18 |
| ARAP1     | 38.8  | 40.96 | 38.57 | 36.91 | 40.74 | 41.35 | 35.51 | 37.75 |
| MTHFD1    | 38.91 | 38.08 | 39.66 | 38.42 | 42.19 | 41.35 | 42.91 | 39.74 |
| SHARPIN   | 42.51 | 42.15 | 38.28 | 36.54 | 37.95 | 41.41 | 31.08 | 35.18 |
| ANXA7     | 40.36 | 40.17 | 41.39 | 40.09 | 44.98 | 41.41 | 48.51 | 44.52 |
| PRRC2B    | 41.89 | 43.16 | 41.44 | 42.27 | 38.65 | 41.45 | 37.74 | 40.64 |
| KIAA1217  | 40.43 | 39.55 | 42.47 | 46.05 | 41.05 | 41.49 | 46.26 | 45.91 |
| COPS9     | 42.45 | 46.17 | 39.06 | 38.38 | 38.62 | 41.51 | 33.92 | 34.25 |
| PRPSAP1   | 41.79 | 44.56 | 42.46 | 41.23 | 39.26 | 41.54 | 37.7  | 40.07 |
| NIT1      | 38.46 | 38.57 | 37.83 | 36.29 | 42    | 41.55 | 36.51 | 35.76 |
| ANAPC5    | 42.24 | 42.76 | 41.74 | 39.8  | 43.5  | 41.56 | 43.32 | 39.97 |
| HP1BP3    | 38.4  | 36.6  | 41.31 | 45.21 | 44.73 | 41.58 | 60.32 | 53.23 |
| ARFRP1    | 43.78 | 46.66 | 41.31 | 41    | 40.98 | 41.63 | 32.96 | 37.83 |
| CFH       | 51.49 | 48.61 | 54.78 | 64    | 39.73 | 41.67 | 67.48 | 60.03 |
| CD59      | 37.66 | 38.19 | 39.5  | 39.91 | 41.71 | 41.68 | 47.11 | 43.45 |
| EIF4E2    | 37.87 | 42.81 | 39.39 | 36.21 | 41.01 | 41.71 | 35.86 | 40.24 |
| EXOSC6    | 36.94 | 35.84 | 36.02 | 31.93 | 37.04 | 41.72 | 29.72 | 33.45 |
| SAMD4B    | 41.51 | 41.31 | 40.95 | 41.55 | 40.86 | 41.73 | 37.83 | 38.03 |
| UTP18     | 34.8  | 35.02 | 37.14 | 34.47 | 41.72 | 41.73 | 42.03 | 39.65 |
| FGFR3     | 41.96 | 44.5  | 42.99 | 40.48 | 36.81 | 41.77 | 31.85 | 37.22 |
| MXD4      | 40.08 | 42.16 | 36.58 | 34.22 | 39.8  | 41.78 | 28.13 | 34.18 |
| FRMD6     | 48.16 | 42.81 | 48.47 | 51.24 | 45.69 | 41.78 | 51.91 | 50.56 |
| SDCBP     | 39.1  | 39.61 | 43.42 | 45.9  | 42.12 | 41.79 | 58.08 | 51.48 |
| RNF10     | 38.94 | 42.83 | 39.44 | 39.5  | 39.63 | 41.81 | 37.2  | 38.09 |
| POR       | 41.67 | 44    | 40.13 | 38.71 | 41.2  | 41.89 | 33.65 | 37.81 |
| AMPD2     | 44.27 | 44.9  | 42.49 | 39.68 | 42.45 | 41.93 | 35.35 | 38.06 |
| MLX       | 40.11 | 40.82 | 38.98 | 38.38 | 44.55 | 41.97 | 42.9  | 42.83 |
| FXYD3     | 35.09 | 32.19 | 31.86 | 32.21 | 38.8  | 41.98 | 35.88 | 40.48 |
| NR1H2     | 46.65 | 45.13 | 40.36 | 39.46 | 39.93 | 42.01 | 31.83 | 35.55 |
| UNC45A    | 44.01 | 45.18 | 42.6  | 39.82 | 44.05 | 42.01 | 33.95 | 38.33 |
| ZNF593    | 40.73 | 41.39 | 40.51 | 39.08 | 41.9  | 42.04 | 29.42 | 33.81 |
| CLNS1A    | 38.14 | 40.58 | 43.58 | 42.96 | 46.13 | 42.04 | 49.14 | 43.13 |
| PEMT      | 35.59 | 35.91 | 32.46 | 32.37 | 38.39 | 42.09 | 32.07 | 34.33 |
| DFNA5     | 44.01 | 47.4  | 46.58 | 42.24 | 40.05 | 42.1  | 42.72 | 44.31 |
| CPNE2     | 51.19 | 52.51 | 47.71 | 46.33 | 38.1  | 42.11 | 31.97 | 36.47 |
| TMEM183A  | 38.23 | 40.8  | 39.15 | 37.36 | 43.51 | 42.11 | 41.01 | 39.12 |
| SMIM7     | 39.78 | 44.7  | 40.39 | 41.41 | 43.23 | 42.14 | 38.58 | 42.77 |
| DDRGK1    | 43.49 | 43.76 | 42.39 | 39.14 | 42.71 | 42.15 | 36.66 | 39.11 |
| ENG       | 41.5  | 41.64 | 37.04 | 37.19 | 40.73 | 42.18 | 33    | 37.02 |
| COG4      | 41.63 | 41.77 | 40.61 | 39.71 | 41.4  | 42.2  | 38.89 | 40.32 |
| TFPI      | 44.01 | 45.45 | 49.86 | 53.9  | 43.04 | 42.25 | 68.18 | 57.39 |
| SNN       | 39.41 | 42.99 | 40.14 | 39.27 | 41.84 | 42.26 | 40.02 | 42.2  |
| ATF6B     | 45.2  | 44.76 | 42.25 | 43.26 | 41.4  | 42.28 | 40.07 | 41.45 |
| RPL7L1    | 40.52 | 39.96 | 43.08 | 41.39 | 44.59 | 42.32 | 46.53 | 44.54 |
| LYPLA1    | 34.75 | 33.49 | 40.79 | 42.33 | 45.14 | 42.32 | 64.43 | 55.88 |
| RAD21     | 39.51 | 35.96 | 43.82 | 48.54 | 45.73 | 42.32 | 65.48 | 56.52 |
| CRTAP     | 42.13 | 41.3  | 41.85 | 40.07 | 43    | 42.41 | 40.03 | 42.51 |
| DGCR2     | 44.46 | 46.53 | 41.37 | 42.49 | 39.98 | 42.42 | 32.08 | 37.04 |
| PTGES2    | 51.94 | 48.91 | 46.79 | 44.43 | 43.83 | 42.42 | 32.69 | 37.06 |
| CELSR1    | 46.95 | 45.01 | 44.92 | 46.29 | 40.31 | 42.42 | 38.64 | 41.99 |
| PLEKHJ1   | 40.65 | 43.34 | 39.75 | 36.78 | 43.78 | 42.43 | 35.53 | 37.11 |
| YDJC      | 36.73 | 37.57 | 35.86 | 33.25 | 40.64 | 42.46 | 31.05 | 36.61 |
| PTDSS1    | 36.77 | 36.24 | 35.68 | 36    | 43.22 | 42.46 | 39.91 | 42.51 |
| PFDN1     | 42.49 | 41.63 | 43.52 | 45.07 | 45.96 | 42.56 | 43.79 | 45.41 |
| SNX7      | 44.44 | 44.51 | 48.46 | 49.61 | 46.9  | 42.56 | 52.75 | 49.36 |
| NFIX      | 46.19 | 46.62 | 44.12 | 44.48 | 42.54 | 42.57 | 35.13 | 38.23 |
| MYO1C     | 47.8  | 47.92 | 44.05 | 43.46 | 43.63 | 42.66 | 34.49 | 37.87 |
| FH        | 42.27 | 40.53 | 39.57 | 39.09 | 43.32 | 42.69 | 45.03 | 40.96 |
| TCEA1     | 41.16 | 41.48 | 46.12 | 47.82 | 45.79 | 42.69 | 56.63 | 52.12 |
| CALD1     | 35.2  | 33.82 | 40.16 | 49.35 | 41.82 | 42.69 | 61.6  | 56.9  |

|          |       |       |       |       |       |       |       |       |
|----------|-------|-------|-------|-------|-------|-------|-------|-------|
| TMEM8A   | 42.3  | 43.57 | 40.84 | 39.29 | 40.28 | 42.71 | 31.09 | 35.55 |
| PCYT2    | 35.46 | 37.67 | 35.11 | 33.59 | 36.42 | 42.73 | 30.64 | 35.89 |
| INPP5D   | 33.18 | 33.23 | 33.54 | 30.86 | 42.5  | 42.74 | 38.95 | 40.01 |
| EMC7     | 45.3  | 45.12 | 40.08 | 42.03 | 42.34 | 42.75 | 49.14 | 43.55 |
| KAT2A    | 36.28 | 35.72 | 35.96 | 36.69 | 40.95 | 42.76 | 45.19 | 42.57 |
| LONP1    | 44.61 | 45.23 | 41.39 | 39.64 | 40.58 | 42.77 | 32.65 | 36.16 |
| PITRM1   | 36.89 | 38.52 | 36.95 | 35.86 | 43.23 | 42.77 | 43.33 | 42.37 |
| ERCC1    | 43.26 | 45.4  | 44.68 | 43.36 | 41.43 | 42.78 | 36.69 | 36.82 |
| CPT1A    | 45.58 | 45.25 | 43.52 | 41.18 | 48.24 | 42.79 | 42.41 | 42.65 |
| M6PR     | 39.96 | 40.37 | 41.39 | 40.15 | 42.58 | 42.79 | 46.52 | 43.11 |
| SNRPF    | 43.22 | 42.95 | 42.89 | 43.95 | 41.76 | 42.79 | 42.34 | 43.81 |
| NPM3     | 36.39 | 38.54 | 35.55 | 31.62 | 46.4  | 42.81 | 34.13 | 39.21 |
| MCRIP2   | 36.49 | 36.91 | 35.73 | 31.26 | 40.6  | 42.82 | 26.62 | 31.63 |
| CPSF4    | 41.78 | 44.95 | 41.72 | 39.37 | 41.69 | 42.86 | 37.33 | 36.81 |
| GLB1     | 42.42 | 45.62 | 42.53 | 41.65 | 43.05 | 42.9  | 41.36 | 41.4  |
| C6orf62  | 44.18 | 41.52 | 47.89 | 52.04 | 44.42 | 42.92 | 58.24 | 53.02 |
| MRPL57   | 43.17 | 41.07 | 43.77 | 38.23 | 45.18 | 42.93 | 37.23 | 35.44 |
| NXT1     | 41.53 | 44.75 | 42.17 | 39.13 | 44.98 | 42.98 | 37.89 | 37.03 |
| AP2A2    | 41.16 | 43.96 | 42.82 | 38.94 | 39.45 | 42.98 | 35.95 | 38.46 |
| PTPN1    | 41.86 | 41.87 | 43.07 | 41.94 | 42.43 | 43.05 | 41.14 | 42.64 |
| CITED4   | 48.87 | 51.41 | 45.83 | 41.47 | 38.96 | 43.06 | 29.52 | 32.05 |
| RARS     | 39.03 | 35.31 | 41.35 | 42.27 | 45.25 | 43.13 | 54.92 | 50.05 |
| LIMA1    | 43.68 | 40.04 | 50.36 | 54.52 | 49.23 | 43.19 | 66.07 | 57.65 |
| PHC2     | 53.07 | 52.76 | 51.51 | 47.88 | 43.59 | 43.21 | 38.1  | 39.03 |
| SAFB     | 47.68 | 48.41 | 46.32 | 44.76 | 45    | 43.21 | 40.81 | 41.83 |
| STX16    | 37.09 | 36.9  | 39.56 | 47.5  | 42.91 | 43.23 | 59.23 | 51.71 |
| NABP2    | 42.38 | 43.67 | 40.39 | 39.42 | 47.59 | 43.27 | 39.87 | 43.04 |
| IDH3G    | 45.91 | 48.73 | 43.26 | 37.78 | 44.63 | 43.28 | 38.25 | 38.96 |
| NAA38    | 43.01 | 46.22 | 44.28 | 35.66 | 41    | 43.29 | 33.85 | 34.43 |
| CBX1     | 44.06 | 38.78 | 44.64 | 49.22 | 46.19 | 43.32 | 53.48 | 50.37 |
| NPDC1    | 36.28 | 37.02 | 34.38 | 34.41 | 40.54 | 43.34 | 33.63 | 37.31 |
| GARS     | 44.31 | 44.45 | 43.71 | 44.9  | 44.68 | 43.34 | 46.88 | 45.29 |
| EIF3CL   | 29.4  | 32.2  | 37.03 | 31.52 | 37.03 | 43.38 | 27.12 | 24.27 |
| PDZD11   | 39.59 | 42.4  | 39.64 | 40.98 | 41.6  | 43.39 | 45.97 | 41.43 |
| SUMO1    | 41.8  | 42.59 | 45.17 | 49.65 | 44.94 | 43.41 | 63.06 | 53.15 |
| SLC12A7  | 42.78 | 43.51 | 42.04 | 40.55 | 43.39 | 43.43 | 36.97 | 39.27 |
| TNRC18   | 41.39 | 40.74 | 41.02 | 40.61 | 37.92 | 43.45 | 34.39 | 37.28 |
| SH3GLB2  | 42.28 | 43.85 | 41.75 | 39.16 | 44.13 | 43.47 | 40    | 39.84 |
| PIM3     | 44.85 | 43.34 | 44.7  | 37.9  | 40.43 | 43.5  | 32.32 | 35.13 |
| IFRD2    | 38.26 | 37.47 | 36.44 | 34.92 | 43.69 | 43.54 | 33.99 | 36.05 |
| TMEM94   | 41.09 | 42.28 | 40.53 | 39.49 | 41.59 | 43.54 | 37.56 | 39.44 |
| ATG4D    | 42.42 | 41.06 | 40.42 | 35.81 | 40.88 | 43.61 | 28.79 | 34.98 |
| ARSA     | 47.39 | 48.43 | 45.34 | 44.45 | 42.53 | 43.62 | 35.16 | 37.44 |
| ANKH     | 40.81 | 38.24 | 40.19 | 40.24 | 45.12 | 43.63 | 42.94 | 39.7  |
| SLC39A6  | 37.02 | 34.82 | 38.99 | 46.09 | 47.65 | 43.65 | 61.77 | 54.11 |
| PLS3     | 42.4  | 39.91 | 46.34 | 48.89 | 46.6  | 43.68 | 61.09 | 52.3  |
| KLC2     | 38.53 | 39.68 | 37.71 | 38.02 | 43.88 | 43.71 | 33.95 | 37.32 |
| DRG1     | 43.3  | 42.21 | 40.43 | 40.58 | 46.43 | 43.77 | 44.35 | 44.2  |
| ESRRA    | 38.19 | 39.83 | 36.17 | 33.82 | 45.5  | 43.79 | 34.64 | 37.72 |
| SEC24C   | 47.1  | 48.96 | 47.24 | 46.32 | 45.83 | 43.81 | 43.08 | 44.12 |
| FBXW5    | 41.68 | 41.21 | 39.88 | 37.2  | 40.5  | 43.82 | 30.35 | 34.64 |
| POLR2J3  | 44.66 | 39.06 | 47.29 | 46.72 | 46.51 | 43.82 | 39.31 | 47.86 |
| DEK      | 42.51 | 39.67 | 44.4  | 47.44 | 46.77 | 43.82 | 66.06 | 57.64 |
| KLC1     | 44.39 | 44.23 | 46.78 | 45.37 | 45.9  | 43.85 | 46.05 | 46.49 |
| NADSYN1  | 36.91 | 36.2  | 34.62 | 38.32 | 42.1  | 43.86 | 41.32 | 45.22 |
| PAICS    | 42.38 | 38.2  | 43.52 | 44.16 | 47.08 | 43.89 | 56.68 | 47.89 |
| SRSF6    | 39.46 | 37.3  | 41.02 | 47.3  | 46.31 | 43.92 | 64.8  | 54.89 |
| LUC7L2   | 43.21 | 41.49 | 44.61 | 45.26 | 44.15 | 43.93 | 50.29 | 45.28 |
| WIPI1    | 37.62 | 43.14 | 40.97 | 39.44 | 45.36 | 43.93 | 42.16 | 45.52 |
| WBSCR27  | 39.69 | 44.32 | 37.47 | 38.64 | 42.11 | 43.94 | 34.67 | 35.23 |
| RHOG     | 43.75 | 45.79 | 43.32 | 37.99 | 40.82 | 43.96 | 37.86 | 37.41 |
| ARHGEF1  | 48.7  | 48.96 | 45.35 | 44.18 | 41.8  | 43.96 | 33.45 | 37.92 |
| RPL26L1  | 39.26 | 38.21 | 39.31 | 37.62 | 44.49 | 43.98 | 42.91 | 41.98 |
| DPM1     | 46.04 | 39.12 | 44.45 | 47.23 | 44.96 | 44.01 | 59.81 | 51.19 |
| PPP2R2A  | 46.91 | 43.67 | 50.68 | 51.94 | 47.19 | 44.04 | 57.96 | 51.15 |
| MRPS7    | 40.42 | 40.09 | 39.69 | 38.02 | 43.89 | 44.05 | 40.8  | 37.41 |
| PCNP     | 35.44 | 38.99 | 37.9  | 43.04 | 45.06 | 44.06 | 61.81 | 55.97 |
| NOL4L    | 51.16 | 50.97 | 48.12 | 52.04 | 43.42 | 44.07 | 41.13 | 44.15 |
| SRSF5    | 39.5  | 38.55 | 39.63 | 47.13 | 44.37 | 44.09 | 64.3  | 57.98 |
| LUC7L3   | 38.94 | 39.96 | 42.78 | 52.26 | 42.58 | 44.09 | 72.68 | 64.08 |
| STAT1    | 79.62 | 76.06 | 80.49 | 84.67 | 42.03 | 44.1  | 55.07 | 44.65 |
| DOCK6    | 45.78 | 45.85 | 45.1  | 43.4  | 43.12 | 44.17 | 37.35 | 41.33 |
| HMG20B   | 45.89 | 45.85 | 44.65 | 41.48 | 40.1  | 44.2  | 33.97 | 37.78 |
| HSPBP1   | 45.29 | 46.32 | 43.18 | 39.06 | 44.69 | 44.21 | 33.87 | 35.82 |
| TMEM106C | 40.89 | 42.47 | 44.16 | 40.65 | 47.35 | 44.25 | 47    | 44.5  |
| FAM213A  | 39.81 | 38.19 | 42.53 | 43.39 | 42.08 | 44.27 | 53.25 | 47.87 |
| CD164    | 44.18 | 42.28 | 46.99 | 51.68 | 43.16 | 44.28 | 68.44 | 59.16 |
| TMEM184B | 45.26 | 47.33 | 43.16 | 43.97 | 42.96 | 44.29 | 37.17 | 41.6  |
| ORAI3    | 42.66 | 45.94 | 44.82 | 42.09 | 44.43 | 44.3  | 36.57 | 41.39 |
| NFIC     | 48.83 | 51.77 | 50.45 | 48.31 | 41.82 | 44.31 | 35.28 | 42.37 |
| SSB      | 36.88 | 38.7  | 42.19 | 49.75 | 47.53 | 44.36 | 73.44 | 62.62 |
| METTL5   | 37.16 | 42.56 | 39.42 | 38.7  | 44.43 | 44.43 | 51.26 | 51.84 |
| LAMP2    | 42.43 | 38.45 | 46.8  | 50.58 | 44.99 | 44.46 | 58.99 | 54.7  |
| IQGAP1   | 41.72 | 37.28 | 46.8  | 48.67 | 47.63 | 44.47 | 58.46 | 54.05 |
| MOSPD3   | 45.77 | 46.85 | 44.71 | 44.62 | 45.5  | 44.5  | 36.66 | 39.3  |
| CHCHD5   | 44.67 | 46.46 | 43.9  | 42.31 | 45.99 | 44.5  | 31.33 | 40.21 |

|            |       |       |       |       |       |       |       |       |
|------------|-------|-------|-------|-------|-------|-------|-------|-------|
| MAP1LC3A   | 48.9  | 45.44 | 41.72 | 39.59 | 43.23 | 44.52 | 30.37 | 33.04 |
| RNF220     | 42.18 | 41.32 | 42.42 | 41.37 | 42.94 | 44.52 | 36.25 | 37.49 |
| GMPS       | 43.33 | 42.68 | 45.34 | 44.47 | 46.07 | 44.53 | 51.81 | 47.45 |
| JOSD2      | 42.32 | 44.71 | 39.62 | 37.07 | 40.48 | 44.56 | 29.07 | 29.69 |
| MBD3       | 42.81 | 43.76 | 38.84 | 36.79 | 42.48 | 44.6  | 30.95 | 33    |
| STK25      | 44.11 | 44.01 | 42.81 | 42.68 | 42.38 | 44.6  | 37.86 | 40.12 |
| SBDS       | 39.09 | 35.46 | 41.9  | 42.97 | 44.34 | 44.61 | 59.42 | 50.43 |
| DDX27      | 42.88 | 39.96 | 42.78 | 43.21 | 48    | 44.65 | 46.04 | 47.05 |
| FPGS       | 42.07 | 41.61 | 41.42 | 38.32 | 42.86 | 44.67 | 33.57 | 36.25 |
| DUT        | 46.74 | 44.09 | 41.93 | 43.19 | 43.79 | 44.67 | 49.99 | 40.18 |
| CUEDC1     | 50.76 | 51.46 | 48.11 | 47.31 | 42.6  | 44.69 | 34.92 | 38.82 |
| RUSC1      | 45.66 | 46.82 | 44    | 44.64 | 46.92 | 44.7  | 40.87 | 40.51 |
| ALDH18A1   | 47.04 | 48.17 | 45.3  | 45.41 | 46.22 | 44.71 | 42.3  | 42.64 |
| PLCB3      | 45.29 | 45.72 | 43.05 | 41.56 | 44.41 | 44.71 | 39.3  | 43.1  |
| USP5       | 46.49 | 44.83 | 44.84 | 42.27 | 45.86 | 44.72 | 39.42 | 40.01 |
| DFFA       | 40.49 | 42.93 | 40.23 | 42.06 | 44.06 | 44.79 | 43.26 | 43.18 |
| XPO1       | 39.12 | 34.72 | 45.54 | 53.1  | 45.48 | 44.81 | 78.17 | 60.59 |
| UCKL1      | 47.41 | 44.86 | 42.66 | 42.18 | 45.73 | 44.88 | 39.2  | 43.53 |
| SUP15H     | 49.35 | 51.06 | 46.07 | 45.38 | 45.42 | 44.94 | 37.27 | 41.81 |
| AHCYL1     | 42.84 | 46.12 | 43.72 | 44.17 | 47.62 | 44.95 | 51.56 | 49.36 |
| ETF1       | 40.46 | 38.31 | 42.17 | 43.56 | 46.34 | 44.97 | 52.24 | 50.23 |
| CELSR2     | 52.73 | 53.78 | 51.64 | 52.58 | 41.02 | 45    | 38.64 | 43.98 |
| WDR6       | 41.9  | 43.43 | 40.74 | 39.89 | 45.1  | 45.03 | 42.15 | 43.18 |
| NDUFB6     | 42.33 | 44.2  | 42.02 | 39.69 | 49.13 | 45.04 | 46.23 | 43.51 |
| ATRN       | 46.45 | 42.93 | 46.94 | 46.66 | 46.85 | 45.08 | 52.49 | 49.37 |
| SUP16H     | 50.19 | 50.46 | 49.4  | 49.83 | 45.05 | 45.12 | 45.05 | 44.99 |
| FLNB       | 52.74 | 50.97 | 50.33 | 47.38 | 44.04 | 45.13 | 41.3  | 42.93 |
| TNPO2      | 40.02 | 40.83 | 39.65 | 40.15 | 44.36 | 45.17 | 43.74 | 44.36 |
| VP551      | 44.68 | 41.32 | 40.69 | 37.89 | 41.22 | 45.19 | 30.08 | 33.85 |
| ACP6       | 32.77 | 35.59 | 32.55 | 32.43 | 42.84 | 45.2  | 40.88 | 42.74 |
| EPAS1      | 49.64 | 52.91 | 51.44 | 51.69 | 45.99 | 45.21 | 45.22 | 46.31 |
| MRPL2      | 43.12 | 41.73 | 44.08 | 38.4  | 46.99 | 45.22 | 39    | 38.52 |
| NADK       | 43.46 | 44.58 | 41.9  | 42.15 | 47.52 | 45.27 | 40.06 | 43.73 |
| SLC25A22   | 43.23 | 44.48 | 41.9  | 39.81 | 45.62 | 45.28 | 36.95 | 39.65 |
| TSG101     | 44.04 | 45.44 | 44.44 | 47.2  | 51.03 | 45.29 | 54.84 | 49.09 |
| TM7SF2     | 47.55 | 51.49 | 43.05 | 41.44 | 41.36 | 45.3  | 35.35 | 39.34 |
| ID1        | 31.09 | 33.16 | 33.16 | 30.61 | 45    | 45.36 | 39.57 | 38.86 |
| TSKU       | 47.56 | 46.88 | 44.55 | 43.68 | 43.82 | 45.36 | 35.14 | 40.26 |
| MAPK1IP1L  | 41.71 | 42.07 | 42.26 | 44.85 | 45.31 | 45.42 | 40.88 | 44.03 |
| FLYWCH1    | 46.03 | 44.08 | 42.37 | 41.32 | 43.52 | 45.5  | 34.55 | 40.39 |
| GTF3A      | 43.84 | 40.76 | 43.44 | 40.12 | 45.07 | 45.5  | 42.93 | 42.98 |
| RAE1       | 41.37 | 42.69 | 40.59 | 38.52 | 47.66 | 45.55 | 45.35 | 46.29 |
| NDN        | 47.45 | 50.43 | 45.2  | 42.83 | 46.58 | 45.56 | 38.72 | 40.04 |
| JAG2       | 47.77 | 46.1  | 44.16 | 43.62 | 41.29 | 45.64 | 34.4  | 38.82 |
| KIAA2013   | 52.64 | 50.69 | 48.77 | 45.66 | 41.96 | 45.66 | 34.16 | 38.22 |
| MMADHC     | 43.84 | 44.19 | 43.18 | 43.47 | 48.34 | 45.66 | 59.54 | 49.42 |
| ST6GALNAC2 | 51.75 | 55    | 50.19 | 52.33 | 43.33 | 45.67 | 39.1  | 42.26 |
| COPS3      | 43.43 | 40.14 | 44.16 | 41.38 | 48.93 | 45.67 | 53.75 | 47.2  |
| CNN3       | 47.51 | 46.56 | 46.5  | 48.79 | 46.21 | 45.69 | 48.09 | 48.74 |
| SRP68      | 48.97 | 49.4  | 47.04 | 47.89 | 47.87 | 45.7  | 45.93 | 45.02 |
| RAC3       | 48.93 | 49.64 | 49.13 | 41.41 | 47.5  | 45.71 | 35.36 | 39.5  |
| LTA4H      | 36.65 | 36.7  | 39.85 | 38.87 | 47.19 | 45.73 | 59.05 | 54.45 |
| PPP6R1     | 44.7  | 44.97 | 43.93 | 40.43 | 45.17 | 45.77 | 37.25 | 38    |
| MED15      | 51.82 | 50.4  | 47.29 | 47.91 | 44.19 | 45.78 | 38.11 | 41.6  |
| EFEMP1     | 56.3  | 55.9  | 61.39 | 64.15 | 49.91 | 45.82 | 60.46 | 50.59 |
| TRIM47     | 45.19 | 44.84 | 43.52 | 38.9  | 43.2  | 45.83 | 33.58 | 35.12 |
| QTRT1      | 43.8  | 42.68 | 39.87 | 38.75 | 43.69 | 45.85 | 40.43 | 38.26 |
| PLK1       | 33.22 | 33.84 | 33.6  | 28.99 | 42.31 | 45.93 | 35.22 | 37.6  |
| WDR45B     | 45.19 | 46.36 | 46.33 | 45.23 | 47.95 | 45.96 | 48.78 | 45.84 |
| LRIG3      | 46.29 | 43.25 | 49.55 | 53    | 47.42 | 45.99 | 58.21 | 51.41 |
| LAMA1      | 41.52 | 41.28 | 40.5  | 44.11 | 43.51 | 46.02 | 49.94 | 48.67 |
| THOP1      | 45.34 | 42.99 | 41.66 | 37.73 | 44.38 | 46.03 | 35.53 | 35.48 |
| RNF126     | 43.15 | 39.4  | 39.81 | 39.85 | 42.96 | 46.08 | 32.31 | 36.92 |
| IFRD1      | 40.31 | 38.68 | 44.31 | 48.65 | 47.51 | 46.1  | 66.52 | 56.53 |
| PITPNM1    | 46.97 | 48.38 | 43.11 | 43.17 | 42.25 | 46.13 | 33.41 | 38.39 |
| DDX42      | 44.35 | 42.08 | 46.16 | 50.34 | 47.9  | 46.15 | 59.7  | 55.6  |
| NASP       | 44.75 | 41.48 | 49.74 | 51.15 | 47.69 | 46.2  | 59.03 | 52.4  |
| PET100     | 52.44 | 49.73 | 51.73 | 48.92 | 51.02 | 46.25 | 42.31 | 49.65 |
| CBX3       | 41.16 | 40.52 | 45.17 | 50.53 | 51.27 | 46.25 | 77.47 | 68.5  |
| CACYBP     | 47.25 | 49.12 | 51.57 | 53.26 | 50.96 | 46.26 | 57.19 | 51.51 |
| FNDC3B     | 48.16 | 44.06 | 52.13 | 59.68 | 45.1  | 46.26 | 58.73 | 56.11 |
| EMC1       | 42.31 | 48.19 | 43.82 | 45.52 | 44.65 | 46.27 | 45.72 | 47.02 |
| ILK        | 53.22 | 57.73 | 51.51 | 50.81 | 47.98 | 46.27 | 44.73 | 47.57 |
| PPP1R18    | 55.86 | 57.91 | 54.71 | 51.92 | 46.4  | 46.31 | 41.33 | 44.48 |
| ELOVL5     | 35.77 | 36.39 | 39.39 | 42.76 | 47.39 | 46.32 | 57.17 | 52.82 |
| DBNL       | 52.16 | 53.66 | 47.6  | 48.61 | 45.14 | 46.36 | 39.36 | 42.19 |
| MLST8      | 41.55 | 40.79 | 38.47 | 35.74 | 41.67 | 46.38 | 32.71 | 34.95 |
| IER2       | 54.18 | 50.4  | 49.06 | 48.67 | 43.1  | 46.41 | 35.44 | 40.82 |
| RELA       | 46.71 | 51.13 | 46.1  | 44.82 | 45.46 | 46.42 | 38.51 | 40.93 |
| ASF1B      | 52.93 | 49.45 | 51.87 | 46.21 | 44.66 | 46.43 | 39.97 | 37.87 |
| TBRG4      | 40.82 | 42.25 | 40.07 | 37.21 | 43.98 | 46.45 | 35.6  | 39.99 |
| TPGS2      | 44.8  | 42.49 | 45.41 | 43.47 | 48.48 | 46.48 | 46.96 | 42.88 |
| FAM32A     | 43.92 | 43.18 | 42.53 | 41.01 | 46.23 | 46.55 | 44.65 | 44.39 |
| OTUB1      | 48.49 | 51.08 | 46.05 | 44.3  | 45.99 | 46.57 | 38.76 | 42.46 |
| RXRA       | 51.56 | 52.13 | 49.23 | 48.16 | 44.72 | 46.58 | 37.56 | 42.52 |



|          |       |       |       |       |       |       |       |       |
|----------|-------|-------|-------|-------|-------|-------|-------|-------|
| TMEM141  | 49.86 | 52.16 | 48.77 | 43.73 | 50.45 | 46.63 | 40.89 | 41.65 |
| KLHDC3   | 48.74 | 47.95 | 46.29 | 42.41 | 44.67 | 46.65 | 39.06 | 38.7  |
| MCFD2    | 44.79 | 42.26 | 47.1  | 49.04 | 48.85 | 46.68 | 59.21 | 53.06 |
| DSG2     | 44.8  | 41.62 | 52.25 | 61.71 | 45.36 | 46.7  | 72.05 | 64.68 |
| ATXN7L3  | 46.94 | 49.24 | 46.03 | 45.18 | 47.44 | 46.71 | 40.93 | 44.8  |
| TRIM8    | 44.62 | 49.11 | 45.34 | 43.59 | 43.35 | 46.73 | 37.35 | 43.31 |
| CCDC47   | 42.6  | 38.18 | 47.48 | 52.84 | 50.29 | 46.74 | 68.12 | 59.83 |
| EXOSC4   | 47.66 | 46.45 | 40.49 | 37.21 | 46.68 | 46.75 | 31.23 | 35.1  |
| MICALL2  | 35.34 | 35.2  | 35.15 | 38.95 | 45.88 | 46.76 | 45.46 | 45.67 |
| PPP1R9B  | 50.58 | 50.39 | 48.26 | 44.76 | 44.45 | 46.8  | 36.89 | 41.56 |
| AHNAK2   | 45.45 | 45.76 | 46.31 | 47.59 | 43.01 | 46.83 | 45.2  | 46.29 |
| RHEB     | 42.69 | 41.22 | 41.33 | 43.88 | 46.31 | 46.83 | 52.17 | 47.65 |
| TBC1D9B  | 50.05 | 47.88 | 48.09 | 48.18 | 46.31 | 46.84 | 41.84 | 42.47 |
| MAP1LC3B | 41.67 | 41.99 | 39.67 | 42.48 | 47.57 | 46.87 | 53.66 | 46.1  |
| SPG21    | 45.57 | 47.1  | 45.74 | 45.32 | 49.35 | 46.89 | 50.18 | 48.76 |
| ROGDI    | 49.61 | 48.83 | 45.31 | 44.38 | 45.41 | 46.96 | 32.84 | 43    |
| B4GAT1   | 45.05 | 47.23 | 43.46 | 41.05 | 47.29 | 46.99 | 37.84 | 41.06 |
| SUN2     | 46.45 | 47.27 | 45.39 | 41.72 | 46.93 | 46.99 | 39.64 | 44.82 |
| SLC16A1  | 49.81 | 44.57 | 50.97 | 55.23 | 50.54 | 47.01 | 62.79 | 55.71 |
| HDAC2    | 47.52 | 46.27 | 51.15 | 56.08 | 50.65 | 47.07 | 66.2  | 62.26 |
| TMED1    | 45.07 | 48.51 | 42.26 | 41.51 | 41.92 | 47.1  | 32.95 | 38.08 |
| MRPS21   | 41.83 | 45.13 | 43.01 | 44.11 | 47.67 | 47.11 | 49.13 | 46.15 |
| NSUN2    | 40.93 | 40.06 | 43.61 | 42.78 | 50.1  | 47.12 | 53.9  | 50.6  |
| CHST12   | 45.49 | 48.49 | 45.34 | 40.55 | 45.21 | 47.15 | 32.52 | 36.77 |
| LIMK1    | 54.35 | 57.81 | 52.17 | 49.07 | 45.95 | 47.15 | 36.89 | 41.94 |
| NUDT14   | 47.34 | 48.36 | 42.54 | 40.13 | 43.82 | 47.17 | 34.27 | 36.74 |
| PDGFA    | 54.28 | 53.92 | 55.91 | 56.43 | 47.25 | 47.19 | 43    | 45.13 |
| TRMT1    | 38.93 | 37.16 | 36.23 | 35.16 | 48    | 47.21 | 41.64 | 41.28 |
| SMO      | 49.62 | 49.16 | 48.34 | 45.29 | 44.73 | 47.23 | 42.17 | 44.76 |
| MMP1     | 45.29 | 47.43 | 43.41 | 41.9  | 41.24 | 47.23 | 45.49 | 46.14 |
| PDDC1    | 42.92 | 40.74 | 39.35 | 38.69 | 44.68 | 47.25 | 41.51 | 41.05 |
| RAB34    | 51.55 | 53.15 | 51.97 | 44.79 | 48.14 | 47.25 | 40.13 | 43.98 |
| DPY30    | 48.17 | 48.56 | 46.89 | 55.13 | 51.54 | 47.26 | 54.42 | 52.99 |
| DGKZ     | 50.02 | 48.76 | 46.55 | 43.87 | 46.51 | 47.32 | 36.96 | 42.01 |
| MPLKIP   | 46.09 | 43.83 | 42.26 | 44.57 | 46.75 | 47.37 | 39.55 | 42.18 |
| LPCAT1   | 45.33 | 45.9  | 46.28 | 44.18 | 45.8  | 47.37 | 43.97 | 45.25 |
| C12orf10 | 43.84 | 47.85 | 46.66 | 42.8  | 48.64 | 47.4  | 39.03 | 41.73 |
| CHERP    | 47.29 | 46.98 | 44.28 | 43.43 | 45.39 | 47.43 | 39.03 | 42.55 |
| SNRPE    | 49.09 | 48.42 | 47.48 | 51.79 | 52.84 | 47.48 | 59.74 | 56.01 |
| SNRPA    | 49.71 | 48.16 | 49.29 | 47.13 | 47.04 | 47.49 | 40.98 | 42.39 |
| HEXA     | 45.17 | 47.46 | 42.86 | 44.53 | 48.61 | 47.52 | 43.78 | 45.43 |
| IGF2R    | 40.93 | 43.67 | 42.73 | 44.85 | 45.45 | 47.56 | 48.43 | 50.42 |
| TMC6     | 43.1  | 43.46 | 40.86 | 40.93 | 43.66 | 47.57 | 36.66 | 41.74 |
| ALKBH7   | 46.71 | 47.57 | 41.66 | 39.7  | 41.83 | 47.59 | 30.36 | 31.3  |
| SDC3     | 54.78 | 58.8  | 54.53 | 54.63 | 47.5  | 47.59 | 40.52 | 45.74 |
| HNRNPA3  | 49.35 | 44.82 | 51.05 | 56.69 | 50.74 | 47.69 | 61.81 | 56.98 |
| MEPCE    | 44.11 | 44.93 | 43.45 | 42.26 | 45.45 | 47.7  | 40.48 | 40.02 |
| NBR1     | 43.81 | 42.17 | 44.8  | 47.49 | 49.93 | 47.7  | 55.97 | 51.79 |
| SMARCE1  | 47.6  | 43.89 | 52.68 | 56.35 | 53.4  | 47.82 | 63.44 | 59.1  |
| PRMT5    | 46.38 | 47.77 | 46.33 | 46.5  | 51.71 | 47.85 | 46.04 | 48.55 |
| CIC      | 49.45 | 50.71 | 47.64 | 47.52 | 45.41 | 47.86 | 39.54 | 42.37 |
| HES1     | 50.04 | 50.1  | 50.24 | 44.29 | 44.2  | 47.89 | 38.44 | 44.27 |
| CSRP1    | 70.38 | 76.8  | 70.06 | 65.64 | 44.69 | 47.9  | 41.32 | 46.79 |
| SORBS3   | 57.64 | 59.17 | 55.49 | 54.55 | 47.04 | 47.93 | 37    | 43.51 |
| ESYT1    | 48.15 | 50.27 | 45.71 | 44.81 | 48.49 | 47.93 | 43.14 | 44.15 |
| PTPRF    | 56.36 | 56.18 | 54.29 | 53.27 | 44.12 | 47.93 | 39.9  | 44.22 |
| SLC39A7  | 43.91 | 47.16 | 45.05 | 45.1  | 48.75 | 47.94 | 44.69 | 47.35 |
| HYOU1    | 51.09 | 53.63 | 50.27 | 51.68 | 48.8  | 47.95 | 44.88 | 46.55 |
| ASS1     | 39.67 | 41.02 | 36.49 | 34.41 | 48.37 | 47.97 | 38.84 | 42.22 |
| EXOSC5   | 39.46 | 43.17 | 40.4  | 36.56 | 49.44 | 48.01 | 35.26 | 36.8  |
| RCC1     | 43.58 | 44.84 | 43.39 | 41.23 | 51.24 | 48.04 | 45.72 | 44.07 |
| WDR54    | 62.7  | 61.37 | 57.41 | 52.11 | 48.61 | 48.14 | 38.38 | 42.17 |
| MRPS18B  | 46.17 | 47.77 | 48.77 | 44.13 | 52.81 | 48.18 | 45.56 | 48.1  |
| PSMC2    | 44.79 | 41.91 | 47.74 | 50.04 | 48.62 | 48.19 | 54.16 | 52.46 |
| UQCRL10  | 44.7  | 46.15 | 44.4  | 43.58 | 47.64 | 48.22 | 45.59 | 45.19 |
| TMEM161A | 43.99 | 45.07 | 43.88 | 39.55 | 47.24 | 48.27 | 39.69 | 42.39 |
| CES2     | 40.34 | 41.12 | 39.25 | 38.01 | 47.1  | 48.32 | 40.38 | 44.07 |
| MRPL55   | 49.74 | 47.1  | 44.59 | 45.62 | 49.93 | 48.34 | 41.1  | 38.63 |
| UBQLN1   | 46.78 | 45.62 | 49.41 | 49.14 | 48.26 | 48.41 | 56.48 | 50.75 |
| DDX24    | 56.46 | 57.2  | 56.73 | 56.18 | 51.4  | 48.42 | 49.65 | 51.25 |
| CMTM6    | 41.11 | 38.42 | 45.36 | 50.91 | 51.72 | 48.42 | 69.72 | 59.77 |
| CD276    | 51.73 | 54.56 | 49.05 | 49.01 | 44.6  | 48.44 | 38.72 | 42.4  |
| SYNCRIP  | 46.67 | 45.18 | 51.95 | 52.88 | 51.49 | 48.46 | 65.16 | 57.94 |
| ABCF2    | 42.92 | 44.15 | 41.9  | 40.88 | 50.02 | 48.49 | 47.35 | 48.13 |
| BZW1     | 45.22 | 39.94 | 51.61 | 52.93 | 48.22 | 48.49 | 68.39 | 58.59 |
| MRPS16   | 44.41 | 44.14 | 42.79 | 42.77 | 47.02 | 48.54 | 41.61 | 41.88 |
| IFI35    | 89.37 | 88.76 | 87.35 | 82.84 | 45.05 | 48.57 | 43.22 | 41.26 |
| MIDN     | 59.75 | 59.07 | 56.1  | 54.85 | 45.25 | 48.61 | 35.67 | 43.43 |
| REEP2    | 43.75 | 44.36 | 44.89 | 41.54 | 50.71 | 48.68 | 38.37 | 44.56 |
| RNF145   | 45.27 | 43.6  | 48.77 | 52.37 | 51.1  | 48.71 | 58.24 | 54.21 |
| AKT2     | 45.43 | 48.64 | 43.43 | 45.02 | 44.81 | 48.72 | 39.69 | 41.73 |
| APOBEC3C | 50.5  | 50.59 | 47.82 | 46.14 | 49.39 | 48.72 | 45.97 | 45.36 |
| TRAPP6A  | 52.29 | 48.24 | 52.11 | 45.48 | 45.98 | 48.74 | 36.37 | 40.08 |
| DHX9     | 49.82 | 48.05 | 50.87 | 52.58 | 52.6  | 48.76 | 60.21 | 55.01 |
| PLEKH3   | 51.42 | 51.37 | 47.8  | 46.1  | 46.47 | 48.81 | 34.94 | 40.37 |

|          |       |       |       |       |       |       |       |       |
|----------|-------|-------|-------|-------|-------|-------|-------|-------|
| GART     | 46.77 | 45.17 | 45.92 | 44.16 | 51.57 | 48.81 | 52.81 | 50.35 |
| YPEL3    | 43.09 | 42.51 | 42.05 | 36.54 | 47.72 | 48.83 | 39.4  | 41.01 |
| TAF6     | 53.05 | 52.51 | 51.13 | 48.05 | 47.87 | 48.87 | 43.36 | 44.12 |
| PIGS     | 54.38 | 57.7  | 53.97 | 53.72 | 48.11 | 49    | 41.9  | 48.57 |
| DDX17    | 49.04 | 46.52 | 51.1  | 56.07 | 50.39 | 49.01 | 64.82 | 58.73 |
| CCDC3    | 35.04 | 38.59 | 34.35 | 32.16 | 48.35 | 49.03 | 42.16 | 45.98 |
| TMEM101  | 48.64 | 48.36 | 45.61 | 42.1  | 47.64 | 49.05 | 40.65 | 45.94 |
| NDE1     | 50.05 | 55.25 | 52.17 | 48.63 | 50.62 | 49.14 | 48.9  | 51.25 |
| H2AFX    | 56.09 | 58.1  | 49.29 | 46.55 | 45.11 | 49.15 | 33.29 | 37.33 |
| PDLIM7   | 52.81 | 54.64 | 50.01 | 47.73 | 43.34 | 49.15 | 38.22 | 44.51 |
| SCRN2    | 46.22 | 47.87 | 44.44 | 43.87 | 46.17 | 49.16 | 36.19 | 39.13 |
| MAPKAPK2 | 48.8  | 52.06 | 48.92 | 48.21 | 45.51 | 49.16 | 39.59 | 44.62 |
| ARFGAP1  | 46.77 | 47.37 | 45.85 | 44.39 | 50.58 | 49.17 | 41.64 | 44.33 |
| RCN2     | 42.75 | 39.24 | 45.03 | 48.86 | 49.54 | 49.17 | 67.58 | 59.33 |
| ADA      | 43.67 | 44.39 | 42.19 | 36.99 | 48    | 49.2  | 38.62 | 43.79 |
| RFNG     | 43.61 | 44.31 | 41.46 | 40.01 | 49.59 | 49.27 | 40.1  | 44.28 |
| MARCKS   | 53.07 | 49.65 | 54.28 | 56.11 | 48.57 | 49.34 | 47.72 | 48.99 |
| SPNS1    | 40.56 | 42.81 | 40.18 | 39.06 | 45.23 | 49.35 | 36.6  | 41.82 |
| TP53     | 50    | 52.05 | 46.76 | 45.78 | 49.98 | 49.4  | 42.09 | 46.07 |
| ATP13A1  | 43.12 | 44.87 | 41.74 | 39.84 | 47.9  | 49.41 | 38.88 | 43.48 |
| PMPCB    | 42.51 | 40.8  | 43.93 | 45.4  | 48.91 | 49.41 | 58.53 | 53.4  |
| ETFA     | 45.83 | 43.18 | 47.86 | 48.99 | 49.96 | 49.42 | 58.44 | 51.31 |
| CMIP     | 48.93 | 51.66 | 48.94 | 48    | 48.72 | 49.45 | 44.97 | 49.27 |
| EIF2AK1  | 44.88 | 45.3  | 46.85 | 46.64 | 50.68 | 49.47 | 52.26 | 49.88 |
| SYTL1    | 51.15 | 47.87 | 46.6  | 45.1  | 44.77 | 49.56 | 43.47 | 44.26 |
| SF3B1    | 46.61 | 42.15 | 53.27 | 63.68 | 50.48 | 49.59 | 84.1  | 70.28 |
| PAIP2    | 50.2  | 49.58 | 53.24 | 54.35 | 53.21 | 49.64 | 69.6  | 62.47 |
| ILVBL    | 47.56 | 46.26 | 43.81 | 41.05 | 45.71 | 49.68 | 35.01 | 38.9  |
| YKT6     | 46.65 | 49.23 | 46.79 | 44.32 | 46.71 | 49.68 | 44.01 | 44.29 |
| TRA2B    | 53.3  | 49.68 | 56.13 | 56.04 | 52.58 | 49.7  | 60.52 | 54.65 |
| POMP     | 45.07 | 50.63 | 49.23 | 45.62 | 50.56 | 49.73 | 58.77 | 51.99 |
| BLOC1S1  | 44.63 | 50.85 | 46.85 | 43.87 | 48.51 | 49.75 | 42.05 | 39.63 |
| NPLOC4   | 46.88 | 49.59 | 47.94 | 45.54 | 48.65 | 49.77 | 44.05 | 46.03 |
| TOP1     | 45.96 | 41.84 | 51.63 | 55.69 | 53.48 | 49.86 | 66.34 | 61.26 |
| GRK6     | 47.44 | 48.7  | 46.27 | 43.35 | 48.64 | 49.92 | 37.43 | 40.79 |
| PLPP2    | 33.13 | 31.99 | 32.18 | 32.66 | 49.76 | 49.95 | 40.41 | 44.93 |
| SCRN1    | 49.91 | 51.76 | 52.29 | 50.58 | 52.21 | 49.97 | 54.58 | 54.16 |
| DNASE2   | 51.92 | 52.13 | 51.43 | 47.15 | 49.68 | 50.05 | 43.14 | 46.41 |
| OXLD1    | 46.43 | 48.18 | 43.3  | 40.72 | 46.13 | 50.08 | 33.79 | 39.38 |
| ISOC2    | 46.6  | 47.27 | 42.9  | 40.84 | 51.41 | 50.08 | 41.87 | 44.56 |
| PPP2CA   | 50.7  | 47.46 | 54.2  | 53.2  | 50.51 | 50.08 | 61.16 | 55.96 |
| ANXA11   | 52.99 | 53.77 | 50.43 | 48.47 | 45.32 | 50.13 | 39.88 | 41.08 |
| HMGCS1   | 42.75 | 43.67 | 49.33 | 60.25 | 49.07 | 50.17 | 70.69 | 70.08 |
| ICAM5    | 52.1  | 54.86 | 49.45 | 48.65 | 43.29 | 50.21 | 39.6  | 43.14 |
| RBM39    | 49.84 | 46.24 | 53.4  | 62.93 | 51.64 | 50.23 | 79.73 | 66.96 |
| ATP5G3   | 54.57 | 53.81 | 50.74 | 48.66 | 52.7  | 50.25 | 47.09 | 47.04 |
| UBE2L3   | 47.62 | 51.24 | 50.98 | 53.36 | 50.07 | 50.25 | 51.03 | 51.36 |
| TRPT1    | 52.37 | 53.19 | 51.54 | 47.4  | 50.86 | 50.27 | 40.55 | 42.88 |
| SAE1     | 48.11 | 51.53 | 47.42 | 46.56 | 49.08 | 50.33 | 43.9  | 43.57 |
| TMEM256  | 51.92 | 54.21 | 47    | 49.75 | 50.15 | 50.35 | 42.46 | 41.9  |
| SSNA1    | 48.4  | 50.13 | 46.83 | 41.09 | 52.62 | 50.36 | 36.66 | 40.76 |
| BCKDK    | 57.13 | 56.17 | 52.72 | 51.21 | 48.42 | 50.4  | 39.56 | 44.12 |
| DEAF1    | 51.3  | 49.3  | 47.61 | 42.44 | 44.19 | 50.42 | 36.36 | 40.3  |
| POP7     | 49.98 | 52.57 | 51.04 | 45.63 | 50.38 | 50.42 | 39.89 | 42.15 |
| SLC4A11  | 48.09 | 46.9  | 47.7  | 49.99 | 46.92 | 50.47 | 47.33 | 47.08 |
| CCAR2    | 56.11 | 54.32 | 51.92 | 51.96 | 51.37 | 50.52 | 45.41 | 48.24 |
| TTL12    | 41.79 | 41.85 | 41.78 | 37.53 | 50.13 | 50.53 | 37.77 | 41.23 |
| CTDNBP1  | 46.37 | 49.47 | 49.54 | 45.4  | 52.41 | 50.56 | 44.48 | 44.86 |
| PNKD     | 45.42 | 49.55 | 49.67 | 45.55 | 49.32 | 50.59 | 40.92 | 44.17 |
| TMEM189  | 47.1  | 48.95 | 46.5  | 45.64 | 49.33 | 50.59 | 43.49 | 49.97 |
| MRPL53   | 53.61 | 53.82 | 50.57 | 48.58 | 51.64 | 50.65 | 44.47 | 44.07 |
| KCNN4    | 44.79 | 48.14 | 43.98 | 43.31 | 47.22 | 50.71 | 36.62 | 39.8  |
| CLPTM1   | 47.09 | 48.49 | 44.25 | 44.29 | 46.81 | 50.71 | 39.68 | 42.93 |
| FADS3    | 41.55 | 40.28 | 40.71 | 40.18 | 53.48 | 50.73 | 47.26 | 46.05 |
| POM121C  | 48.39 | 48.32 | 47.19 | 49.27 | 48.27 | 50.74 | 44.52 | 48.1  |
| SHKBP1   | 50.53 | 52.06 | 47.62 | 44.15 | 47.66 | 50.79 | 37.24 | 43.32 |
| EXTL3    | 46.42 | 49.19 | 46.23 | 45.63 | 49.19 | 50.85 | 46.92 | 47.9  |
| RAD23B   | 50.91 | 48.03 | 52.07 | 53.95 | 52.03 | 50.85 | 58.26 | 54.57 |
| SPTBN1   | 53.13 | 52.22 | 53.36 | 54.12 | 50.81 | 50.87 | 52.75 | 52.89 |
| SUN1     | 45.87 | 44.94 | 45.44 | 47.94 | 50.96 | 50.88 | 56.15 | 53.73 |
| CDK16    | 51.82 | 54.4  | 50.64 | 49.89 | 49.14 | 50.92 | 42.14 | 48.41 |
| PQBP1    | 43.42 | 41.05 | 42.77 | 37.98 | 47.73 | 51.04 | 34.72 | 37.77 |
| NRDC     | 48.68 | 46.21 | 50.09 | 51.17 | 53.18 | 51.08 | 62.23 | 57.81 |
| NELFE    | 54.13 | 55.75 | 49.35 | 49.21 | 54.94 | 51.09 | 46.09 | 46.63 |
| SF3B6    | 48.85 | 55.36 | 50.2  | 54.44 | 54.9  | 51.12 | 64.62 | 62    |
| LYPD6B   | 48.58 | 48.48 | 51.9  | 50.81 | 52.56 | 51.14 | 55.61 | 49.77 |
| PLXNA2   | 50.81 | 50.07 | 50.13 | 50.1  | 49.15 | 51.17 | 45.01 | 47.92 |
| RPS19BP1 | 48.35 | 51.01 | 50.21 | 43.75 | 49.26 | 51.19 | 41.47 | 41.8  |
| NGRN     | 50.64 | 48.27 | 51.03 | 48.29 | 52.35 | 51.19 | 48.48 | 48.92 |
| MEA1     | 51.98 | 57.28 | 52.96 | 47.85 | 51.53 | 51.21 | 40.91 | 45.9  |
| SUMO3    | 47.71 | 53.46 | 46.84 | 49.24 | 49.75 | 51.22 | 45.84 | 48.16 |
| SF3A3    | 48.97 | 48.66 | 49.92 | 49.68 | 56.34 | 51.22 | 55.91 | 52.74 |
| CANT1    | 52.4  | 53.87 | 49.72 | 46.57 | 49.66 | 51.24 | 41.31 | 45.78 |
| DIAPH1   | 55.71 | 57.12 | 55.66 | 55.34 | 53.24 | 51.28 | 52.08 | 52.35 |
| SF3A1    | 51.72 | 53.03 | 52.73 | 50.1  | 54.64 | 51.29 | 45.91 | 49.03 |
| SRSF3    | 50.49 | 50.19 | 53.01 | 52.42 | 53.58 | 51.29 | 63.35 | 52.53 |
| FAM127B  | 51.72 | 51.35 | 51.24 | 50.34 | 48.84 | 51.39 | 41.08 | 44.31 |
| PHLDA2   | 39.12 | 46.16 | 37.35 | 38.27 | 47.52 | 51.42 | 31.77 | 36.42 |

|           |       |       |       |       |       |       |       |       |
|-----------|-------|-------|-------|-------|-------|-------|-------|-------|
| SPATA20   | 57.36 | 53.39 | 49.87 | 48.27 | 50.86 | 51.43 | 43.32 | 45.61 |
| MFSD10    | 49.99 | 47.55 | 47.17 | 45.42 | 48.05 | 51.44 | 45.08 | 48.57 |
| CTSZ      | 56.02 | 56.71 | 55.09 | 53.26 | 50.64 | 51.46 | 40.17 | 47.62 |
| EI24      | 44.21 | 45.54 | 46.21 | 43.28 | 54.23 | 51.46 | 53.43 | 50.52 |
| CDK5      | 47.9  | 51.48 | 46.28 | 46.24 | 51.78 | 51.49 | 44.6  | 47.56 |
| LMNB2     | 56.79 | 54.81 | 53.34 | 49.82 | 51.52 | 51.5  | 40.61 | 45.23 |
| RRM1      | 51.74 | 47.63 | 52.1  | 50.08 | 57    | 51.55 | 63.55 | 55.07 |
| CDC123    | 40.9  | 40.18 | 42.43 | 45.24 | 53.53 | 51.56 | 60.11 | 52.04 |
| P3H1      | 54.99 | 59.66 | 53.04 | 54.1  | 48.74 | 51.58 | 44.1  | 47.1  |
| IK        | 53.73 | 49.7  | 53.12 | 56.6  | 54.48 | 51.62 | 60.93 | 60.67 |
| CTNND1    | 56.03 | 55.97 | 57.99 | 59.19 | 54.41 | 51.67 | 60.1  | 58.18 |
| NACC1     | 50.37 | 53.02 | 49.77 | 47.46 | 49.47 | 51.71 | 38.95 | 46.51 |
| AGAP3     | 50.52 | 51.74 | 49.3  | 47.16 | 52.96 | 51.77 | 41.68 | 47.94 |
| UBE2Z     | 60.15 | 59.87 | 58.5  | 57.54 | 53.3  | 51.8  | 49.23 | 49.27 |
| CEND1     | 40.22 | 42.18 | 36.92 | 35.34 | 46.19 | 51.81 | 33.11 | 39.16 |
| ALDOC     | 69.4  | 73.2  | 64.43 | 65.07 | 47.63 | 51.83 | 43.28 | 51.36 |
| UPF1      | 56.97 | 56.25 | 54.83 | 51.61 | 49.28 | 51.89 | 42.86 | 45.48 |
| TCF3      | 54.48 | 54.06 | 52.25 | 50.93 | 50.35 | 52.04 | 42.72 | 43.92 |
| PKP3      | 54.27 | 51.79 | 52.56 | 44.79 | 48.23 | 52.1  | 37.34 | 40.2  |
| EPRS      | 47.9  | 39.28 | 54.27 | 57.07 | 56.16 | 52.25 | 73.75 | 64.03 |
| TAF7      | 50.6  | 50.51 | 50.77 | 50.96 | 52.4  | 52.26 | 58.49 | 55.66 |
| EMC4      | 53.19 | 53.5  | 50.77 | 49.35 | 57.08 | 52.27 | 49.7  | 48.99 |
| COPB2     | 53.61 | 50.26 | 55.93 | 58.08 | 55.31 | 52.29 | 66.35 | 60.27 |
| NKIRAS2   | 53.51 | 54.83 | 53.22 | 50.27 | 53.11 | 52.38 | 47.83 | 49.17 |
| TMEM54    | 63.22 | 63.33 | 56.44 | 52.2  | 50.21 | 52.39 | 38.39 | 44.97 |
| C19orf48  | 53.21 | 48.41 | 48.91 | 45.41 | 48.1  | 52.42 | 40.92 | 41.37 |
| MPC2      | 47.98 | 48.05 | 48.56 | 47.75 | 51.84 | 52.51 | 52.71 | 49.65 |
| TGFBR2    | 52.4  | 51.03 | 54.02 | 59.15 | 51.45 | 52.52 | 61.08 | 56.19 |
| LSM2      | 50.99 | 49.39 | 48.94 | 46.8  | 51.43 | 52.69 | 46.19 | 46.43 |
| ADD1      | 55.88 | 59.1  | 54.16 | 54.11 | 50.87 | 52.72 | 48.41 | 50.3  |
| GSK3A     | 51.33 | 53.61 | 52.37 | 51.1  | 54.57 | 52.72 | 42.78 | 50.76 |
| PDCD5     | 52.95 | 51.76 | 48.88 | 54.62 | 53.41 | 52.77 | 54.68 | 55.23 |
| DDX3X     | 49.48 | 43.29 | 55.21 | 61.54 | 55.21 | 52.79 | 76.07 | 68.52 |
| ITGB5     | 63.41 | 64.54 | 59.08 | 61.48 | 48.94 | 52.85 | 43.95 | 47.83 |
| FAM189B   | 45.23 | 45.78 | 45.81 | 42.47 | 50.18 | 52.86 | 42.29 | 47.43 |
| TPX2      | 47.85 | 45.58 | 45.72 | 43.38 | 58.06 | 52.88 | 56.08 | 54.17 |
| ALG3      | 48.94 | 49.89 | 46.99 | 44.82 | 56.23 | 52.9  | 45.56 | 47.92 |
| IFI16     | 68.11 | 62.88 | 79.47 | 89.49 | 56.9  | 52.9  | 84.27 | 71.49 |
| MRPL41    | 48.74 | 46.13 | 44.84 | 42.43 | 50.59 | 52.91 | 40.69 | 44.39 |
| SCAP      | 52    | 49.98 | 46.81 | 45.83 | 48.84 | 52.95 | 40.19 | 42.24 |
| SIVA1     | 61.55 | 55.54 | 51.61 | 49.86 | 50.31 | 52.95 | 38.32 | 42.5  |
| NRBP1     | 61.21 | 60.92 | 57.74 | 55.4  | 53.27 | 53.03 | 48.02 | 51.11 |
| SLC12A9   | 50.43 | 50.44 | 48.49 | 49.11 | 47.82 | 53.06 | 37.98 | 46.51 |
| COPB1     | 53.58 | 49.21 | 60.63 | 62.15 | 56.92 | 53.14 | 76.98 | 68.83 |
| B4GALT1   | 56.57 | 55.73 | 57.51 | 56.77 | 53.49 | 53.18 | 51.34 | 53.33 |
| YIPF2     | 53.86 | 52.07 | 52.06 | 46.94 | 52.83 | 53.21 | 40.13 | 46.58 |
| DPP9      | 50.85 | 50.32 | 50.12 | 47.94 | 49.74 | 53.22 | 43.09 | 46.35 |
| RNF44     | 46.9  | 46.65 | 47.6  | 47.22 | 56.34 | 53.22 | 51.22 | 52.25 |
| MRPS12    | 49.92 | 47.88 | 46.06 | 42.91 | 52.64 | 53.25 | 38.19 | 45.81 |
| LDOC1     | 56.22 | 56.62 | 54.31 | 51.47 | 50.77 | 53.25 | 42.96 | 48.69 |
| DCAF7     | 51.9  | 53.52 | 52.15 | 51.86 | 53.04 | 53.27 | 50.8  | 53.04 |
| LAMC1     | 51.02 | 52.28 | 51.38 | 54.42 | 51.95 | 53.32 | 56.87 | 54.8  |
| ATN1      | 53.38 | 54.57 | 52.54 | 54.28 | 49.92 | 53.33 | 43.79 | 50.22 |
| PCDHGC3   | 50.35 | 55.09 | 50.4  | 49.65 | 51.46 | 53.37 | 43.63 | 49.85 |
| MAPK3     | 52.9  | 56.31 | 49.31 | 48.99 | 49.6  | 53.41 | 41.28 | 45.08 |
| USF2      | 51    | 52.71 | 49.55 | 46.33 | 53.92 | 53.42 | 40.45 | 43.53 |
| DNMT1     | 59.26 | 56.7  | 57.63 | 53.75 | 54.69 | 53.45 | 48.55 | 49.42 |
| POFUT1    | 54.32 | 53.88 | 53.4  | 53.6  | 53.3  | 53.45 | 51.56 | 51.03 |
| SCAF1     | 58.88 | 58.24 | 54.07 | 51.35 | 49.87 | 53.46 | 35.97 | 41.47 |
| TMBIM1    | 43.29 | 49.65 | 45.67 | 43.77 | 51.64 | 53.48 | 47.24 | 50.09 |
| NUMA1     | 56.78 | 55.35 | 54.08 | 53.07 | 51.9  | 53.52 | 46.33 | 50.67 |
| GABARAPL2 | 49.82 | 50.8  | 51.38 | 55.36 | 56.41 | 53.56 | 64.71 | 59.86 |
| DDB2      | 48.75 | 49.12 | 48.17 | 46.52 | 56.85 | 53.58 | 51.32 | 50.02 |
| LITAF     | 52.9  | 55.9  | 55.64 | 52.53 | 57.47 | 53.63 | 55.41 | 57.45 |
| ETS2      | 61.85 | 61.42 | 61.36 | 60.89 | 58.47 | 53.7  | 54.48 | 55.9  |
| COA3      | 52.14 | 50.51 | 50.89 | 47.85 | 52.24 | 53.73 | 47.05 | 49.52 |
| SRC       | 53.53 | 55.05 | 49.04 | 49.15 | 51.33 | 53.74 | 42.06 | 46.56 |
| CALM3     | 56.24 | 60.08 | 55.79 | 54.21 | 57.3  | 53.76 | 46.78 | 52.04 |
| CD70      | 51.48 | 49.98 | 49.69 | 46.5  | 52.93 | 53.77 | 44.69 | 50.2  |
| VPS4A     | 63.18 | 62.66 | 58.06 | 55.59 | 49.51 | 53.81 | 40.18 | 47.09 |
| PSME2     | 56.97 | 55.3  | 56.74 | 52.93 | 55.58 | 53.84 | 57.28 | 54.13 |
| FOXA2     | 63.08 | 63.79 | 59.23 | 56.68 | 49.84 | 53.89 | 42.8  | 45.37 |
| HDAC3     | 54.72 | 58.91 | 55.59 | 51.96 | 54.86 | 53.99 | 49.54 | 51.45 |
| PSMB6     | 57.32 | 57.5  | 53.52 | 50.6  | 60.67 | 54.09 | 47.25 | 48.67 |
| MRPL18    | 50.75 | 51.13 | 50.18 | 47    | 52.41 | 54.09 | 51.6  | 50.55 |
| IRF3      | 56.75 | 57.56 | 54.05 | 52.18 | 56.67 | 54.13 | 47.85 | 50.47 |
| SNRPC     | 55.32 | 53.89 | 55.55 | 52.02 | 60.97 | 54.15 | 54.71 | 54.11 |
| CDK5RAP3  | 54.06 | 51.94 | 53.48 | 53.65 | 56.02 | 54.16 | 58.58 | 59.19 |
| TOP2A     | 44.97 | 36.8  | 52.12 | 56.86 | 59.23 | 54.16 | 91.24 | 78.26 |
| KIAA0100  | 49.64 | 51.89 | 50.49 | 48.61 | 54.67 | 54.19 | 54.38 | 53.25 |
| PRPF19    | 57.18 | 55.7  | 55.16 | 51.66 | 55.05 | 54.3  | 46.49 | 46.78 |
| STK11     | 49.46 | 50.73 | 47.11 | 46.9  | 51.14 | 54.32 | 41.93 | 43.87 |
| AMIGO2    | 47.17 | 44.27 | 51.4  | 59.42 | 56.16 | 54.33 | 74.1  | 60.98 |
| TCF25     | 52.87 | 52.65 | 50.99 | 47.48 | 53.41 | 54.35 | 45.44 | 48.8  |
| ZNF207    | 59.08 | 53.54 | 57.77 | 62.88 | 56.15 | 54.37 | 68.35 | 59.6  |
| IMMT      | 50.62 | 50.72 | 52.78 | 52.23 | 55.99 | 54.38 | 57.65 | 57.89 |
| FAM162A   | 63.97 | 61.29 | 61.59 | 63.23 | 52.36 | 54.53 | 61.22 | 55.49 |

|              |       |       |       |       |       |       |       |       |
|--------------|-------|-------|-------|-------|-------|-------|-------|-------|
| FAM49B       | 50.27 | 46.12 | 53.45 | 59.18 | 58.03 | 54.55 | 73.79 | 62.21 |
| TXNL4A       | 47.98 | 50.04 | 49.51 | 48.11 | 57.82 | 54.58 | 50.38 | 46.96 |
| SEC23B       | 55.46 | 52.35 | 53.81 | 52.62 | 55.84 | 54.65 | 58.34 | 56.21 |
| VMP1         | 48.67 | 51.48 | 53.6  | 55.42 | 56.64 | 54.75 | 73.39 | 62.27 |
| RABL6        | 52.73 | 55.55 | 53.3  | 50.97 | 51.52 | 54.76 | 41.04 | 46.71 |
| LZTS2        | 59.33 | 60.1  | 57.84 | 55.69 | 52.46 | 54.86 | 43.92 | 48.78 |
| NT5C         | 49.31 | 53.05 | 50.88 | 46.28 | 51.58 | 54.89 | 41.24 | 45.77 |
| MATR3        | 55.6  | 52.27 | 61.73 | 69.35 | 57    | 54.91 | 84.05 | 72.91 |
| SLC35C2      | 48.85 | 54.64 | 47.21 | 49.3  | 55.24 | 54.92 | 50.82 | 49.55 |
| ACADVL       | 62.31 | 63.48 | 60.3  | 54.33 | 55.95 | 54.99 | 51.56 | 53.22 |
| RPS6KA1      | 50.81 | 52.29 | 48.73 | 44.27 | 57.1  | 55.01 | 47.98 | 51.52 |
| BZW2         | 49.14 | 49.23 | 49.23 | 51.48 | 59.53 | 55.05 | 62.65 | 56.55 |
| EMD          | 54.81 | 56.1  | 51.81 | 51.02 | 56.67 | 55.08 | 43.32 | 47.22 |
| ARL2BP       | 51.54 | 56.36 | 55.98 | 56.78 | 57.18 | 55.09 | 60.51 | 56.57 |
| NUTF2        | 53.19 | 53.28 | 51.7  | 48.38 | 58.67 | 55.11 | 49.85 | 50.83 |
| RBM4         | 63.92 | 65.97 | 65.02 | 59.19 | 59.12 | 55.15 | 47.1  | 51.95 |
| PRCC         | 57.59 | 58.72 | 57.12 | 56.52 | 55.08 | 55.24 | 47.93 | 50.75 |
| IDH1         | 48.09 | 48.41 | 52.69 | 51.59 | 58.49 | 55.27 | 67.89 | 62.45 |
| MYO10        | 52.84 | 51.63 | 54.15 | 57.5  | 55.09 | 55.31 | 57.5  | 59.19 |
| CNPY2        | 55.01 | 52.82 | 55.26 | 53.44 | 54.86 | 55.33 | 48.11 | 48.68 |
| NSMF         | 50.38 | 52.23 | 48.74 | 46.35 | 52.69 | 55.33 | 43.87 | 48.79 |
| GLMP         | 57.01 | 57.79 | 55.97 | 57.48 | 56.48 | 55.4  | 47.25 | 48.63 |
| MRPL38       | 54.1  | 52.24 | 52.43 | 45.56 | 53.08 | 55.44 | 43.37 | 45.68 |
| CXXC5        | 76.67 | 73.68 | 73.05 | 69.97 | 54.33 | 55.46 | 47.9  | 50.03 |
| LARP1        | 50.38 | 50.16 | 52.22 | 53.11 | 54.68 | 55.49 | 54.75 | 55.02 |
| STAT3        | 56.39 | 59.4  | 55.26 | 53.2  | 56.96 | 55.54 | 52.97 | 55.27 |
| PDHA1        | 52.38 | 54.21 | 52.07 | 52.32 | 58.79 | 55.56 | 57.99 | 58.2  |
| OBSL1        | 74.87 | 72.66 | 69.03 | 66.09 | 48.12 | 55.69 | 39.83 | 44.9  |
| IVNS1ABP     | 46.77 | 48.12 | 50.93 | 56.44 | 60.92 | 55.71 | 76.66 | 70.07 |
| NOSIP        | 56.82 | 56.96 | 55.12 | 46.16 | 53.37 | 55.73 | 38.99 | 44.17 |
| COMMD4       | 52.83 | 53.56 | 50.58 | 45.08 | 53.11 | 55.86 | 43.74 | 45.36 |
| TNIP1        | 65.7  | 61.51 | 61.46 | 57.68 | 58.92 | 55.87 | 47.61 | 49.33 |
| ACACA        | 43.6  | 48.37 | 44.18 | 47.97 | 54.42 | 55.87 | 56.73 | 59.34 |
| VPS25        | 56.79 | 58.02 | 54.31 | 52.01 | 56.81 | 55.89 | 51.71 | 53.57 |
| DCTN2        | 50.67 | 54.18 | 51.84 | 47.64 | 56.54 | 55.92 | 53.16 | 54.12 |
| TXNL1        | 50.48 | 52.25 | 54.65 | 53.98 | 57.69 | 55.92 | 66.44 | 61.22 |
| UBALD2       | 57.2  | 56.58 | 53.51 | 48.87 | 54.3  | 56    | 39.54 | 47.02 |
| CAMTA1       | 53.87 | 58.12 | 57.83 | 60.15 | 58    | 56.03 | 56.77 | 54.49 |
| RBM42        | 58.2  | 57.81 | 55.29 | 50.19 | 53.88 | 56.05 | 39.84 | 41.88 |
| ETV4         | 61.91 | 62.3  | 59.98 | 57.43 | 56.72 | 56.06 | 47.57 | 50.95 |
| TMEM63B      | 47.31 | 52.62 | 48.88 | 49.43 | 56.07 | 56.07 | 49.27 | 57.04 |
| RUVBL1       | 54.39 | 56.49 | 54.34 | 53.6  | 61.66 | 56.08 | 53.17 | 57.05 |
| OClAD1       | 50.78 | 51.08 | 55.43 | 56.2  | 57.88 | 56.14 | 73.66 | 64.27 |
| MKRN1        | 59.05 | 61.58 | 58.87 | 60.43 | 59.12 | 56.15 | 59.78 | 60.19 |
| MKNK2        | 81.17 | 77.78 | 77.71 | 69.9  | 53.74 | 56.16 | 46.32 | 50.4  |
| EPPK1        | 50.62 | 49.65 | 48.18 | 45.35 | 48    | 56.17 | 38.89 | 44.95 |
| SBF1         | 53.61 | 52.8  | 50.42 | 47.61 | 54.07 | 56.17 | 43.02 | 48.15 |
| ATP6AP2      | 52.47 | 48.87 | 54.72 | 59.84 | 58.74 | 56.26 | 72.67 | 65.33 |
| THOC3        | 58.58 | 57.48 | 56.21 | 57.18 | 59.21 | 56.3  | 52.89 | 53.66 |
| PLIN3        | 60.41 | 62.62 | 58.12 | 53.87 | 54    | 56.35 | 44.44 | 49.24 |
| UBE3C        | 50.33 | 49.39 | 53.47 | 52.86 | 58.2  | 56.44 | 64.54 | 60.26 |
| POLDIP2      | 50.39 | 51.1  | 49.43 | 46.46 | 58.75 | 56.45 | 48.2  | 53.71 |
| C16orf58     | 59.67 | 60.09 | 55.49 | 54.16 | 57.6  | 56.47 | 46.88 | 54.19 |
| CCND1        | 48.42 | 48.61 | 49.47 | 51.68 | 59.8  | 56.49 | 57.54 | 56.92 |
| BOLA2-SMG1P6 | 46.93 | 47.94 | 48.85 | 51.71 | 61.39 | 56.52 | 69.24 | 61.56 |
| MYOF         | 50.96 | 49.78 | 54.66 | 57.03 | 60.32 | 56.53 | 68.05 | 61.1  |
| KIAA1522     | 54.4  | 53.69 | 52.08 | 50.9  | 51.1  | 56.67 | 44.52 | 50.26 |
| MAN1B1       | 59.41 | 61.5  | 55.3  | 53.48 | 54.29 | 56.73 | 46.74 | 49.59 |
| SPATS2L      | 64.35 | 62.63 | 68.92 | 74.42 | 58.4  | 56.83 | 64.94 | 57.89 |
| PAK1         | 50.97 | 52.9  | 50.31 | 49.78 | 59.08 | 56.85 | 60.91 | 62.33 |
| MRPS26       | 58.15 | 59.02 | 55.79 | 50.91 | 59.28 | 56.91 | 45.2  | 48.79 |
| NUDT22       | 58.1  | 56.4  | 54.82 | 52.59 | 52.85 | 56.91 | 46.74 | 51.45 |
| FBXL12       | 63.65 | 66.2  | 66.91 | 62.8  | 60.31 | 56.92 | 61.27 | 60.39 |
| WDR34        | 56.74 | 54.79 | 52.47 | 48.68 | 58.65 | 56.94 | 45.64 | 43.56 |
| UBE2D2       | 59.64 | 59.34 | 58.23 | 55.36 | 58.41 | 56.96 | 55.74 | 53.61 |
| TM9SF4       | 59.07 | 63.12 | 58.84 | 62.51 | 56.25 | 56.99 | 55.12 | 58.59 |
| CD24         | 50.51 | 51.12 | 56.84 | 65.11 | 61.98 | 56.99 | 80.79 | 70.65 |
| TIMM50       | 51.05 | 54    | 50.78 | 47.71 | 55.93 | 57    | 42.06 | 48.99 |
| LTBP4        | 55.8  | 56.19 | 52.79 | 52.92 | 52.67 | 57.02 | 47.12 | 50.73 |
| IP6K2        | 58.94 | 57.74 | 52.32 | 56.48 | 56.68 | 57.03 | 54.15 | 53.11 |
| DNAJC7       | 52.94 | 52.82 | 56.93 | 56.65 | 59.57 | 57.06 | 66.99 | 62.26 |
| CHMP1A       | 58.44 | 57.95 | 55.08 | 52.62 | 53.58 | 57.11 | 44.46 | 51.4  |
| PNPLA6       | 52.79 | 54.55 | 49.05 | 48.52 | 54.3  | 57.15 | 43.69 | 48.4  |
| EXOC7        | 60.46 | 59.71 | 57.56 | 56.27 | 58.65 | 57.15 | 50.34 | 55.06 |
| GLO1         | 57.28 | 50.8  | 59.95 | 60.19 | 62.41 | 57.2  | 75.44 | 64.36 |
| LIMD2        | 62.17 | 64.34 | 60.21 | 58.1  | 58.17 | 57.23 | 47.19 | 54.91 |
| BABAM1       | 56.63 | 56.46 | 55.39 | 53.33 | 60.64 | 57.25 | 50.25 | 53.39 |
| NMT1         | 57.03 | 58.02 | 58.78 | 58.13 | 57.05 | 57.26 | 55.89 | 56.14 |
| WDR77        | 54.58 | 55.43 | 54.91 | 53.7  | 58.04 | 57.26 | 57    | 57.46 |
| C11orf98     | 55.93 | 53.79 | 53.2  | 54.28 | 57.76 | 57.27 | 52.13 | 57.11 |
| SNX3         | 54.39 | 54.8  | 57.06 | 56.87 | 60.73 | 57.3  | 64.98 | 59.19 |
| TIMM23       | 53.74 | 54.28 | 52.27 | 50.43 | 58.2  | 57.33 | 49.44 | 54.44 |
| SEC13        | 56.17 | 56.85 | 51.87 | 52.37 | 58.26 | 57.35 | 46.89 | 47.76 |
| RRAS         | 58.17 | 58.14 | 56.45 | 56.2  | 53.74 | 57.39 | 43.33 | 45.96 |
| EBNA1BP2     | 51.87 | 50.52 | 50.73 | 48.92 | 60.92 | 57.4  | 58.9  | 57.19 |
| NDUFV2       | 53.7  | 52.32 | 55.67 | 55.94 | 57.19 | 57.46 | 64.46 | 58.2  |
| KIAA0930     | 53.47 | 54.63 | 52.14 | 50.09 | 54.7  | 57.48 | 47.11 | 49.93 |

|          |       |       |       |       |       |       |       |       |
|----------|-------|-------|-------|-------|-------|-------|-------|-------|
| CDC20    | 48.01 | 43    | 42.54 | 37.03 | 54.81 | 57.51 | 41.57 | 47.02 |
| ABHD17A  | 60.31 | 58.19 | 55.86 | 50.8  | 53.47 | 57.62 | 38.19 | 43.51 |
| POLR2E   | 55.55 | 56.14 | 54.68 | 49.8  | 55.77 | 57.75 | 44.52 | 49.29 |
| USP11    | 62.27 | 67.46 | 59.73 | 57.63 | 54.75 | 57.75 | 47.01 | 50.09 |
| DAG1     | 58.4  | 63.87 | 57.69 | 59.33 | 53.76 | 57.75 | 50.82 | 56.3  |
| NSUN5    | 54.02 | 53.1  | 50.6  | 48.16 | 56.46 | 57.77 | 47.87 | 48.38 |
| AP1M1    | 54.28 | 53.32 | 52.76 | 51.31 | 56.79 | 57.78 | 47.46 | 51.93 |
| SLIRP    | 58.76 | 55.98 | 57.63 | 61.42 | 59.45 | 57.79 | 65.53 | 64.02 |
| DDX49    | 53.35 | 52.37 | 50.24 | 45.52 | 57.12 | 57.86 | 46.49 | 46.71 |
| KDM1A    | 63.6  | 67.13 | 66.16 | 62.11 | 60.44 | 57.89 | 57.56 | 59.66 |
| RAVER1   | 62.4  | 61.1  | 58.93 | 55.14 | 53.41 | 57.91 | 42.34 | 48.83 |
| PBXIP1   | 66.69 | 71.56 | 66.32 | 65.24 | 55.94 | 57.91 | 49.57 | 56.26 |
| TIMMDC1  | 49.26 | 50.35 | 52.4  | 54.94 | 55.62 | 57.92 | 61.16 | 57.37 |
| PES1     | 58.27 | 57.58 | 54.46 | 51.28 | 59.27 | 57.96 | 52.13 | 51.72 |
| SHMT2    | 64.19 | 65.11 | 59.51 | 54    | 58.36 | 57.97 | 46.6  | 49.08 |
| NCAPD2   | 55.87 | 53.3  | 54.2  | 50.66 | 58.26 | 57.98 | 54.7  | 52.75 |
| TSTA3    | 52.9  | 57.01 | 49.28 | 46.4  | 54.46 | 57.99 | 44.13 | 49.27 |
| HSBP1    | 57    | 58.15 | 58.28 | 57.58 | 59.44 | 58.05 | 63.93 | 60.05 |
| CUEDC2   | 61.79 | 63.6  | 56.59 | 52.84 | 55.85 | 58.09 | 44.82 | 49.09 |
| ATP6V1G1 | 56.89 | 55.89 | 57.82 | 60.69 | 65.57 | 58.1  | 75.32 | 71.06 |
| PSMC4    | 59.57 | 61.4  | 58.2  | 54.64 | 59.6  | 58.12 | 50.88 | 53.92 |
| ADSL     | 49.71 | 48.75 | 51.64 | 47.61 | 61.4  | 58.12 | 54.99 | 56.91 |
| TRAM1    | 57.58 | 53.86 | 57.84 | 63.73 | 61.11 | 58.16 | 85.25 | 71.17 |
| GUSB     | 60.74 | 61.73 | 57.38 | 58.78 | 59.35 | 58.17 | 57.95 | 55.14 |
| MFN2     | 59.74 | 59.26 | 56.99 | 53.21 | 59.33 | 58.25 | 54.76 | 58.18 |
| HADHB    | 59.86 | 60.58 | 61.98 | 55.9  | 59.45 | 58.27 | 62.61 | 58.31 |
| RER1     | 56.8  | 55.56 | 57.29 | 55.65 | 58.86 | 58.29 | 56.62 | 55.5  |
| ACAT2    | 56.55 | 60.04 | 58.61 | 54.93 | 59.7  | 58.29 | 59.78 | 61.6  |
| SCPEP1   | 63.52 | 64.29 | 61.87 | 67.43 | 58    | 58.3  | 65.22 | 63.54 |
| AAMP     | 55.12 | 57.88 | 54.59 | 51.74 | 61.17 | 58.34 | 51.23 | 52.16 |
| RAB1A    | 54.22 | 56.06 | 60.76 | 62.22 | 62.6  | 58.36 | 73.32 | 67.64 |
| UTP4     | 56.79 | 54.7  | 56.12 | 52.48 | 64.39 | 58.39 | 60.23 | 57.06 |
| STRA13   | 54.55 | 57.1  | 54.23 | 52.02 | 59.78 | 58.4  | 49.03 | 49.54 |
| NCK2     | 64.66 | 63.15 | 67.07 | 64.75 | 54.9  | 58.47 | 51.42 | 52.53 |
| DNAJA1   | 55.04 | 53.2  | 61.75 | 65.41 | 63.57 | 58.48 | 74.49 | 70.65 |
| ALDH7A1  | 58.88 | 61.03 | 59.9  | 58.88 | 61.85 | 58.49 | 66.93 | 62.86 |
| ANXA8L1  | 54.83 | 50.07 | 52.16 | 55.2  | 59.07 | 58.54 | 58.18 | 56.79 |
| DNAJB11  | 60.62 | 57.13 | 62.61 | 68.28 | 61.76 | 58.54 | 70.74 | 64.03 |
| TFG      | 64.22 | 61.99 | 69.25 | 66.2  | 58.02 | 58.59 | 70.58 | 64.27 |
| R3HDM4   | 61.02 | 56.56 | 54.94 | 50.55 | 57.41 | 58.6  | 48.09 | 53.7  |
| COMMD6   | 63.62 | 59.53 | 56.79 | 61.17 | 61.88 | 58.82 | 72.46 | 59.77 |
| CRACR2B  | 55.57 | 55.86 | 53.48 | 48.51 | 56.04 | 58.83 | 44.81 | 47.59 |
| C4orf48  | 53.33 | 47.4  | 43.83 | 41.9  | 46.3  | 58.86 | 34.68 | 37.73 |
| TMEM173  | 66.45 | 67.72 | 64.1  | 63.07 | 60.8  | 58.86 | 53.87 | 55.41 |
| EFTUD2   | 55.94 | 57.66 | 55.39 | 51.66 | 57.3  | 58.88 | 53.42 | 53.69 |
| BAD      | 63.74 | 65.92 | 60.2  | 55.13 | 56.22 | 58.9  | 43.55 | 46.09 |
| SRRM2    | 58.69 | 57.01 | 58.28 | 61.52 | 55.99 | 58.97 | 65.99 | 66.07 |
| PPP1R14C | 67.35 | 67.54 | 68.33 | 67.24 | 59.44 | 58.98 | 59.2  | 62.04 |
| ATP6V0D1 | 58.95 | 61.24 | 54.03 | 54.8  | 56.9  | 59.01 | 49.8  | 55.05 |
| ZNF358   | 62.93 | 65.9  | 59.12 | 57.66 | 50.65 | 59.07 | 38.66 | 46.3  |
| COL4A6   | 61.25 | 63.97 | 62.78 | 66.78 | 55.91 | 59.07 | 63.57 | 64.42 |
| GRB2     | 58.25 | 60.32 | 57.14 | 58.65 | 60.31 | 59.08 | 53.6  | 56.86 |
| REEP4    | 52.99 | 51.99 | 51.63 | 50.51 | 54.95 | 59.09 | 46.39 | 51.96 |
| SGTA     | 56.09 | 60.52 | 56.32 | 50.66 | 61.08 | 59.13 | 47.72 | 49.59 |
| HINT2    | 57.15 | 55.42 | 57.3  | 55.11 | 54.59 | 59.15 | 45.09 | 48.28 |
| PSMD7    | 58.91 | 54.48 | 56.41 | 58.83 | 62.03 | 59.17 | 66.26 | 62.29 |
| TMEM14C  | 64.46 | 63.5  | 65.76 | 60.89 | 62.88 | 59.18 | 59.88 | 56.58 |
| YARS     | 58.99 | 59.4  | 60.89 | 54.56 | 60.8  | 59.2  | 56.7  | 54.95 |
| MDFI     | 61.99 | 65.22 | 57.67 | 56.21 | 55.12 | 59.21 | 43.99 | 48.63 |
| TMEM248  | 54.56 | 55.92 | 54.8  | 56.58 | 59.77 | 59.3  | 61.22 | 61.04 |
| PPP2R4   | 61.19 | 61.6  | 58.64 | 54.98 | 57.75 | 59.31 | 49.54 | 50.35 |
| CTBP1    | 66.19 | 64.17 | 64.65 | 63.04 | 56.62 | 59.34 | 48.93 | 53.29 |
| SLC52A2  | 54.02 | 53.19 | 49.11 | 47.31 | 56.27 | 59.35 | 44.26 | 47.01 |
| DNAJC8   | 61.97 | 61.04 | 58.01 | 57.93 | 62.99 | 59.36 | 64.51 | 61.84 |
| HSPH1    | 53.37 | 50.05 | 60.48 | 66.66 | 57.92 | 59.38 | 80.65 | 74.25 |
| PLCG1    | 58.91 | 60.1  | 57.69 | 58.35 | 60.81 | 59.42 | 57.68 | 59.34 |
| TMEM219  | 64.83 | 69.63 | 62.17 | 61.48 | 61.26 | 59.46 | 55.7  | 54.03 |
| VOPP1    | 68.78 | 70.45 | 69.27 | 65.93 | 60.38 | 59.47 | 57.02 | 57.68 |
| TSC22D4  | 59.39 | 60.45 | 58.23 | 56.46 | 58.26 | 59.51 | 44.86 | 49.98 |
| COASY    | 58.62 | 57.79 | 56.34 | 52    | 57.07 | 59.51 | 48.95 | 52.81 |
| BLVRB    | 68.97 | 63.77 | 58.37 | 53.06 | 57.35 | 59.56 | 45.26 | 49.78 |
| TMEM147  | 51.23 | 52.3  | 48.45 | 49.07 | 52.71 | 59.59 | 47.73 | 50.76 |
| FAM120A  | 56.14 | 51.56 | 57.25 | 60.24 | 58.56 | 59.61 | 63.07 | 60.47 |
| SSH3     | 60.4  | 59.29 | 57.91 | 55.49 | 55.97 | 59.64 | 48.11 | 56.55 |
| METRN    | 60.68 | 59.54 | 57.61 | 50.28 | 54.33 | 59.65 | 41.27 | 46.99 |
| LAMTOR1  | 58.59 | 59.32 | 52.94 | 53.83 | 58.57 | 59.69 | 52.63 | 56.91 |
| ARF3     | 62.71 | 69.69 | 62.25 | 62.4  | 61.37 | 59.74 | 53.03 | 61.32 |
| DNM2     | 63.58 | 65.98 | 61.26 | 58.61 | 59    | 59.81 | 49.93 | 53.49 |
| SLC38A2  | 50.93 | 49.9  | 59.59 | 68.98 | 63.27 | 59.84 | 91.06 | 80.76 |
| PRKDC    | 52.23 | 49.51 | 54.76 | 56.14 | 61.16 | 59.9  | 73.58 | 67.32 |
| FLNC     | 51.09 | 50.34 | 49.25 | 46.25 | 57.15 | 59.94 | 46.79 | 51.57 |
| UROD     | 57.81 | 56.73 | 53.32 | 52.05 | 64.95 | 59.99 | 49.12 | 54.17 |
| DGUOK    | 60.36 | 66.56 | 58.38 | 57.37 | 62.23 | 59.99 | 58.49 | 55.18 |
| MRPS6    | 57.01 | 61.05 | 60.1  | 57.18 | 61.18 | 59.99 | 56.55 | 56.67 |
| NAGLU    | 54.41 | 56.9  | 52.2  | 51.32 | 55.29 | 60.02 | 43.98 | 47.41 |
| SRSF2    | 57.81 | 54.56 | 55.98 | 57.66 | 59.99 | 60.04 | 64.83 | 64.14 |
| POM121   | 55.1  | 56.99 | 55.24 | 56.29 | 60.05 | 60.23 | 58.58 | 61.36 |

|          |        |        |        |        |       |       |        |       |
|----------|--------|--------|--------|--------|-------|-------|--------|-------|
| BCAR1    | 70.73  | 67.77  | 64.36  | 61.19  | 57.84 | 60.25 | 43.67  | 47.96 |
| CSNK2A1  | 57.01  | 59.59  | 63.44  | 61.56  | 62.17 | 60.25 | 66.65  | 63.83 |
| NARS     | 50.71  | 47.33  | 55.7   | 62.58  | 63    | 60.28 | 85.34  | 73.76 |
| HLA-E    | 71.87  | 75.75  | 69.56  | 66.35  | 61.65 | 60.33 | 53.3   | 55.58 |
| FKBP2    | 60.74  | 66.56  | 66.18  | 63.56  | 64.66 | 60.43 | 58.26  | 63.57 |
| CAPZA1   | 53.44  | 54.58  | 55.89  | 64.66  | 60.76 | 60.47 | 87.13  | 78.3  |
| NETO2    | 53.13  | 50.56  | 59.28  | 56.95  | 61.22 | 60.48 | 75.02  | 73.7  |
| ADAM9    | 48.65  | 50.16  | 56.29  | 70.36  | 63.66 | 60.49 | 105.88 | 89.77 |
| MCL1     | 59.76  | 57.56  | 61.96  | 63.15  | 62.52 | 60.51 | 68.19  | 63.22 |
| NCOR2    | 66.08  | 64.98  | 63.16  | 62.29  | 55.63 | 60.52 | 48.27  | 52.37 |
| PSMA2    | 55.27  | 55.7   | 57.02  | 56.12  | 65.42 | 60.6  | 73.89  | 64.98 |
| ETFB     | 66.27  | 67.17  | 66.73  | 58.82  | 60.03 | 60.61 | 46.37  | 51.61 |
| MRPL21   | 56.64  | 56.89  | 54.78  | 50.5   | 61.35 | 60.67 | 49.96  | 56.01 |
| MRPL27   | 53.16  | 52.11  | 48.78  | 48.77  | 60.33 | 60.73 | 51.55  | 52.33 |
| DCAKD    | 57.29  | 60.48  | 54.16  | 54.24  | 59.27 | 60.75 | 50.67  | 55.12 |
| RIC8A    | 60.33  | 61.82  | 57.75  | 56.14  | 59.06 | 60.78 | 51.91  | 53.69 |
| CHMP4B   | 69.54  | 64.41  | 65.25  | 63.79  | 64.28 | 60.79 | 56.62  | 58.63 |
| STARD7   | 56.09  | 54.8   | 57.28  | 55.15  | 64.07 | 60.81 | 64.28  | 66.14 |
| PPA1     | 50.29  | 49.18  | 54.41  | 53.67  | 65.48 | 60.93 | 76.89  | 65.96 |
| MRPL36   | 52.08  | 55.06  | 55.61  | 55.39  | 61.13 | 60.97 | 56.07  | 58.49 |
| NECTIN1  | 78.71  | 77.22  | 74.31  | 73.59  | 57.78 | 61.04 | 50.67  | 57.89 |
| COA4     | 53.95  | 53.5   | 52.31  | 49.92  | 62.93 | 61.05 | 57.32  | 58.93 |
| G3BP1    | 67.85  | 66.39  | 71.67  | 70.99  | 64.73 | 61.15 | 73.48  | 67.88 |
| PRPF8    | 60.52  | 60.3   | 59.33  | 58.1   | 61.08 | 61.25 | 59.32  | 58.21 |
| RNF187   | 73.56  | 71.7   | 69.36  | 63.88  | 58.55 | 61.27 | 46.86  | 52    |
| DGCR6L   | 57.96  | 56.78  | 58     | 49.21  | 59.93 | 61.28 | 41.68  | 42.53 |
| AGPAT1   | 65.05  | 65.49  | 64.85  | 59.65  | 62.8  | 61.4  | 54.55  | 62.5  |
| DTD1     | 64.38  | 64.94  | 64.47  | 60.23  | 62.01 | 61.41 | 56.76  | 57.39 |
| SMS      | 61.02  | 59.75  | 60.27  | 62.39  | 67.07 | 61.49 | 68.96  | 64.4  |
| LRPPRC   | 46.3   | 39.56  | 54.22  | 58.69  | 63.23 | 61.54 | 93.59  | 81.7  |
| SLC44A2  | 66.8   | 74.03  | 66.5   | 65.51  | 60.35 | 61.55 | 56.06  | 62.67 |
| GSTO1    | 64.26  | 68.91  | 61.24  | 62.09  | 67.1  | 61.56 | 63.58  | 63.62 |
| CHTF8    | 69.58  | 68.67  | 69.49  | 63.58  | 61.08 | 61.66 | 56.87  | 57.65 |
| PSME3    | 59.24  | 58.31  | 57.3   | 58.4   | 64.24 | 61.67 | 61.85  | 60.51 |
| UBE2H    | 60.34  | 60.31  | 64.88  | 66.99  | 62.88 | 61.74 | 71     | 67.8  |
| MGMT     | 60.43  | 60.66  | 57.17  | 51.41  | 62.61 | 61.75 | 48.16  | 49.97 |
| HMGB1    | 64.24  | 61.26  | 66.06  | 72.16  | 66.2  | 61.8  | 78.85  | 70.75 |
| BUB3     | 49.06  | 47.09  | 54.17  | 56.53  | 62.5  | 61.83 | 74.89  | 67.45 |
| MYL6B    | 66.16  | 72.4   | 64.47  | 62.86  | 64.6  | 61.84 | 50.6   | 59.29 |
| SLC7A5   | 59.73  | 59.8   | 57.02  | 56.07  | 58.82 | 61.89 | 47.61  | 52.32 |
| MRPL3    | 60.22  | 55.87  | 60.26  | 60.02  | 68.04 | 61.9  | 73.37  | 64.37 |
| MTA2     | 64.25  | 65.16  | 61.62  | 59.84  | 62.87 | 61.94 | 55.18  | 58.49 |
| TP53I13  | 71.98  | 70.26  | 66.27  | 59.22  | 63.03 | 61.95 | 43.99  | 50.37 |
| ATP5J    | 58.34  | 57.96  | 61.14  | 56.7   | 63.82 | 61.99 | 63.54  | 65.93 |
| CNBP     | 60.52  | 57.8   | 65.24  | 67.79  | 64.2  | 62.13 | 74.26  | 69.87 |
| SERPINH1 | 115.82 | 118.94 | 109.04 | 105.34 | 57.91 | 62.16 | 49.34  | 54.83 |
| CD99L2   | 60.81  | 64.2   | 58.12  | 57.66  | 59.65 | 62.2  | 51.81  | 58.53 |
| MAGEA2B  | 53.34  | 59.89  | 52.94  | 53.58  | 61.35 | 62.29 | 60.04  | 67.03 |
| IER5     | 56.75  | 56.15  | 52.85  | 52.74  | 57.88 | 62.33 | 48.5   | 49.04 |
| OGDH     | 57.47  | 58.89  | 55.4   | 53.84  | 60.05 | 62.35 | 52.38  | 57.39 |
| C17orf62 | 66.43  | 63.97  | 64.63  | 59.46  | 58.45 | 62.39 | 53.77  | 54.19 |
| DPYSL3   | 60.3   | 59.54  | 60.06  | 59.63  | 62.09 | 62.45 | 64.29  | 61.34 |
| TOMM34   | 51.09  | 51.21  | 54.34  | 48.99  | 66.27 | 62.51 | 59.96  | 60.98 |
| TIMM17B  | 60.14  | 62.49  | 57.17  | 57.43  | 60.19 | 62.52 | 46.07  | 47.64 |
| PHLDA3   | 50.22  | 52.14  | 49.65  | 47.07  | 60.44 | 62.54 | 47.62  | 50.38 |
| CCM2     | 64.14  | 68.12  | 66.91  | 62.53  | 59.34 | 62.56 | 54.2   | 56.26 |
| ATP1B1   | 60.71  | 58.59  | 65.56  | 70.35  | 65.52 | 62.67 | 79.15  | 74.72 |
| TADA3    | 70.83  | 72.68  | 65.58  | 63.39  | 66.13 | 62.73 | 52.95  | 57.48 |
| COA1     | 56.87  | 60.43  | 57.8   | 53.66  | 57.74 | 62.78 | 58.14  | 60.18 |
| CTNNBIP1 | 66.51  | 66.23  | 64     | 60.4   | 61.18 | 62.87 | 52.37  | 55.43 |
| PARP1    | 68.96  | 70.85  | 69.14  | 66.46  | 64.3  | 62.88 | 59.37  | 62.49 |
| NDUFS3   | 54.2   | 54.52  | 52.41  | 51.13  | 65.68 | 63.02 | 55.47  | 61.11 |
| PSMA4    | 63.15  | 63.91  | 63.77  | 65.13  | 67.94 | 63.08 | 79.78  | 75.18 |
| CA12     | 67.75  | 66.56  | 71.97  | 69.79  | 61.08 | 63.1  | 67.12  | 64.94 |
| SZRD1    | 62.36  | 65.1   | 62.15  | 60.93  | 65.69 | 63.17 | 57.36  | 56.98 |
| TSR3     | 59.5   | 57.55  | 54.99  | 50.04  | 57.34 | 63.2  | 42.34  | 44.87 |
| NDUFAF3  | 61.69  | 63.76  | 60.21  | 55.38  | 61.6  | 63.24 | 48.28  | 53.6  |
| GRAMD1A  | 61.91  | 64.63  | 61.64  | 56.79  | 61.19 | 63.27 | 49.78  | 55.07 |
| SOX9     | 78.39  | 80.96  | 78.89  | 78.78  | 57.65 | 63.28 | 55.17  | 62.9  |
| SPARC    | 86.39  | 93.95  | 84.83  | 85.47  | 58.83 | 63.29 | 57.77  | 60.1  |
| ACIN1    | 61.63  | 58.95  | 63.99  | 66.79  | 65.47 | 63.34 | 70.21  | 71.9  |
| OXA1L    | 60.9   | 63.01  | 63.86  | 57.55  | 66.18 | 63.36 | 61.97  | 62.77 |
| ANKRD65  | 64.68  | 66.68  | 65.68  | 59.47  | 60.48 | 63.39 | 53.58  | 56.77 |
| CDC34    | 60.49  | 61.59  | 57.42  | 53.88  | 62.33 | 63.5  | 45.81  | 48.54 |
| EIF2S3   | 60.95  | 60.27  | 67.38  | 70.65  | 68.64 | 63.54 | 87.52  | 76.44 |
| TMX2     | 57.75  | 59.61  | 56.18  | 59.19  | 68.78 | 63.56 | 68.26  | 69.49 |
| SNU13    | 59.75  | 63.2   | 58.76  | 60.32  | 67.12 | 63.62 | 63.28  | 60.69 |
| MOGS     | 67.38  | 67.7   | 64.11  | 61.88  | 60.66 | 63.68 | 55.36  | 59.21 |
| LAPTM4A  | 66.17  | 69.01  | 68.57  | 69.77  | 63.18 | 63.74 | 67.04  | 62.79 |
| DNPH1    | 72.37  | 67.03  | 61.96  | 59.41  | 62.72 | 63.78 | 48.35  | 54.68 |
| MANF     | 65.72  | 64.23  | 68.06  | 67.12  | 64.17 | 63.83 | 64.6   | 63.98 |
| MANBAL   | 60.95  | 68.09  | 61.07  | 58.62  | 67.5  | 63.95 | 61.44  | 59.73 |
| HDFFRP2  | 66.87  | 68.35  | 65.63  | 60.86  | 63.05 | 63.99 | 51.65  | 58.28 |
| PON2     | 68.64  | 68.47  | 70.64  | 78.75  | 66.6  | 64.16 | 91.02  | 80.54 |
| AP3D1    | 64.8   | 65.24  | 61.98  | 61.01  | 62.79 | 64.17 | 53.06  | 59.3  |
| MET      | 56.03  | 49.45  | 66.64  | 72.06  | 67.14 | 64.31 | 90.78  | 77.74 |
| TARS     | 56.74  | 52.13  | 60.64  | 64.87  | 65.49 | 64.35 | 83.64  | 74.79 |

|              |       |       |       |       |       |       |        |       |
|--------------|-------|-------|-------|-------|-------|-------|--------|-------|
| SEPN1        | 73.27 | 73.12 | 71.45 | 67.93 | 63.62 | 64.38 | 56.06  | 60.42 |
| MBTPS1       | 61.77 | 62.6  | 62.26 | 62.43 | 63.59 | 64.44 | 64.53  | 63.52 |
| PPT1         | 56.52 | 56.48 | 55.84 | 58.19 | 68.13 | 64.49 | 74.57  | 67.61 |
| SCARB1       | 52.79 | 56.92 | 54.66 | 52.7  | 58.3  | 64.53 | 53.27  | 58.79 |
| P3H4         | 68.31 | 70    | 64.28 | 63.01 | 55.14 | 64.66 | 49.63  | 54.19 |
| XYLT2        | 68.58 | 72.02 | 63.15 | 64.07 | 58.79 | 64.68 | 49.54  | 51.77 |
| AHSA1        | 61.98 | 67.13 | 60.54 | 59.26 | 64.2  | 64.72 | 65.09  | 64.3  |
| CDH2         | 56.98 | 59.86 | 61.7  | 65.67 | 65.98 | 64.74 | 76.01  | 71.93 |
| DVL1         | 57.04 | 58.12 | 56.72 | 51.7  | 62.41 | 64.85 | 47.86  | 54.73 |
| RNF5         | 66.42 | 68.86 | 62.03 | 59.53 | 68.29 | 64.97 | 52.9   | 59.3  |
| VPS35        | 58.63 | 54.13 | 65    | 66.42 | 68.39 | 65.09 | 85.51  | 75.94 |
|              | 44454 | 58.86 | 60.78 | 62.61 | 67.07 | 65.58 | 65.21  | 78.1  |
| NCLN         | 62.31 | 59.36 | 58.07 | 54.35 | 60.99 | 65.22 | 47.88  | 51.38 |
| CHID1        | 66.86 | 71.85 | 64.05 | 61.43 | 62.83 | 65.22 | 52.21  | 58.88 |
| MOV10        | 74.88 | 74.16 | 71.2  | 70.94 | 63.83 | 65.22 | 61.66  | 60.75 |
| SERBP1       | 57.02 | 52.46 | 62.04 | 66.25 | 70.39 | 65.26 | 82.39  | 77.92 |
| SSRP1        | 77.78 | 79.81 | 81.71 | 77.27 | 67.53 | 65.28 | 62.23  | 64.41 |
| VDAC3        | 60.34 | 60.55 | 62.38 | 62.35 | 69.02 | 65.34 | 75.41  | 65.24 |
| TWF2         | 67.53 | 68.5  | 64.5  | 59.29 | 61.89 | 65.38 | 50.01  | 56.19 |
| FASTK        | 66.53 | 64.19 | 63.47 | 60.85 | 61.83 | 65.39 | 56.61  | 57.62 |
| SMARCD2      | 65.59 | 68.98 | 64.79 | 62.42 | 63.67 | 65.41 | 55.77  | 58.54 |
| PCSK1N       | 70.05 | 73.2  | 64.14 | 57.02 | 59.48 | 65.46 | 36.11  | 43.14 |
| PSMC1        | 64.14 | 61.33 | 64.56 | 66.05 | 69.03 | 65.46 | 70.38  | 66.5  |
| ODC1         | 59.74 | 57.15 | 55.77 | 55.78 | 69.94 | 65.48 | 65.99  | 62.45 |
| DUS1L        | 61.18 | 60.26 | 57.24 | 54.25 | 63.9  | 65.5  | 54.14  | 55.54 |
| DDX39A       | 58.55 | 58.85 | 59.5  | 51.71 | 68.22 | 65.74 | 57.03  | 56.28 |
| IDS          | 63.81 | 58.23 | 66.55 | 66.46 | 65.02 | 65.74 | 71.31  | 68.24 |
| LOC102724023 | 52.55 | 58.37 | 55.26 | 52.78 | 63.53 | 65.77 | 52.28  | 55.95 |
| TRABD        | 63.59 | 61.91 | 58.96 | 56.49 | 62.63 | 65.78 | 53.8   | 54.45 |
| TSPAN4       | 63.42 | 63.02 | 59.56 | 54.17 | 69.14 | 65.81 | 58.35  | 57.14 |
| ZDHHC12      | 68.93 | 68.11 | 62.44 | 56.84 | 61.53 | 65.82 | 46.41  | 52.02 |
| EZR          | 62.57 | 64.1  | 62.24 | 60.5  | 68.95 | 65.96 | 60.93  | 64.43 |
| C19orf60     | 70.49 | 68.17 | 67.48 | 61.3  | 61.88 | 65.99 | 51     | 50.47 |
| UQCR11       | 64.51 | 61.73 | 61.92 | 58.37 | 68.59 | 66.11 | 56.1   | 59.35 |
| FAM89B       | 69.88 | 68    | 65.23 | 58.98 | 60.67 | 66.14 | 43.77  | 49.13 |
| TRAF4        | 74.93 | 74.85 | 70.83 | 69.14 | 63.08 | 66.18 | 52.94  | 59.23 |
| PTPRU        | 67.26 | 67.58 | 65.25 | 63.1  | 65.72 | 66.29 | 54.33  | 59.13 |
| CYB5A        | 63.84 | 65.95 | 64.68 | 64.96 | 72.78 | 66.39 | 66.69  | 63.84 |
| TRPC4AP      | 67.25 | 65.55 | 64.31 | 63.48 | 65.38 | 66.4  | 63.05  | 61.43 |
| IARS2        | 57.79 | 54.35 | 61.93 | 65.27 | 71.15 | 66.41 | 85.32  | 77.31 |
| CDIPT        | 62.33 | 64.81 | 62.68 | 58.67 | 63.68 | 66.6  | 50.96  | 57.25 |
| SPCS1        | 62.59 | 66.42 | 64.89 | 63.69 | 72.36 | 66.64 | 66.64  | 62.82 |
| VAMP3        | 61.79 | 61.96 | 64.88 | 64.71 | 68.48 | 66.69 | 77.03  | 69.74 |
| EFNB1        | 65.37 | 68.72 | 63.79 | 59.39 | 66.08 | 66.74 | 56.03  | 60.87 |
| HLA-C        | 85.19 | 89.1  | 82.33 | 77.99 | 69.71 | 66.76 | 57.17  | 57.69 |
| GLRX3        | 61.82 | 61.79 | 61.79 | 62.22 | 68.54 | 66.76 | 72.05  | 72.42 |
| ALDH4A1      | 64.05 | 66.53 | 61.27 | 58.03 | 67.28 | 66.83 | 52.26  | 60.36 |
| HIF1A        | 71.13 | 69.44 | 82.08 | 91.29 | 67.57 | 66.88 | 101.03 | 92.87 |
| NUBP2        | 59.83 | 63.07 | 57.52 | 50.44 | 60.69 | 66.93 | 45.39  | 48.28 |
| MED10        | 58.61 | 55.9  | 60    | 57.35 | 73.52 | 66.94 | 70.95  | 64.01 |
| NOB1         | 61.39 | 62.38 | 60.39 | 59.92 | 70.28 | 67.02 | 58.36  | 61.8  |
| LAMTOR2      | 59.36 | 54.17 | 60.32 | 59.13 | 64.6  | 67.03 | 56.06  | 57.66 |
| TAF15        | 67.78 | 70.48 | 71.12 | 70.06 | 72.88 | 67.07 | 74.93  | 75.5  |
| CS           | 59.22 | 63.98 | 58.2  | 57.8  | 67.72 | 67.1  | 67.01  | 68.4  |
| FADS1        | 51.97 | 56.86 | 55.54 | 57.26 | 66.7  | 67.11 | 67.17  | 72.68 |
| TOMM5        | 68.06 | 60.97 | 58.44 | 58.12 | 72.32 | 67.17 | 74.13  | 67.49 |
| SDHB         | 59.1  | 56.65 | 57.72 | 56.35 | 74.98 | 67.19 | 71     | 66.83 |
| PITX1        | 80.4  | 80.41 | 74.08 | 66.6  | 57.01 | 67.22 | 40.73  | 50.74 |
| EPHX1        | 68.08 | 74.73 | 67.39 | 64.23 | 61.43 | 67.24 | 55.1   | 62.81 |
| DYNC1H1      | 61.93 | 62.82 | 61.99 | 63.87 | 63.98 | 67.25 | 66.77  | 69.25 |
| UBE2E3       | 73.8  | 71.86 | 77.44 | 74.59 | 71.4  | 67.28 | 76.22  | 69.23 |
| NUCKS1       | 65.19 | 61.44 | 72.6  | 78.43 | 74.41 | 67.33 | 92.15  | 82.38 |
| TLN1         | 70.52 | 71.38 | 68.69 | 65.14 | 63.82 | 67.34 | 57.01  | 61.97 |
| TOMM40       | 60.64 | 58.05 | 59.24 | 55.51 | 65.7  | 67.35 | 51.46  | 56.42 |
| AGTRAP       | 64.92 | 67.84 | 62.18 | 59.33 | 62.34 | 67.36 | 53.33  | 57.12 |
| ACTR2        | 67.01 | 62.12 | 71.49 | 79.61 | 72.06 | 67.43 | 98     | 84.05 |
| EWSR1        | 70.29 | 67.5  | 70.57 | 69.18 | 72.65 | 67.5  | 70.23  | 69.67 |
| NSA2         | 65.76 | 65.56 | 68.98 | 70.14 | 81.04 | 67.55 | 88.94  | 82.25 |
| TOMM7        | 71.56 | 73.48 | 69.81 | 73.65 | 71.16 | 67.61 | 65.73  | 68.34 |
| FEZ1         | 69    | 73.9  | 68.13 | 65.21 | 69.99 | 67.64 | 62.74  | 62.3  |
| ELOF1        | 68.44 | 65.21 | 63.32 | 63.84 | 67.78 | 67.71 | 58.08  | 59.89 |
| RBM38        | 61.05 | 64.74 | 61.72 | 58.66 | 65.89 | 67.89 | 51.15  | 59.37 |
| CSNK1G2      | 67.18 | 70.43 | 67.11 | 62.4  | 66.67 | 67.92 | 54.38  | 57.13 |
| NOP10        | 57.42 | 63.18 | 54.88 | 60.36 | 68.22 | 67.96 | 61.73  | 62.25 |
| MTA1         | 62.06 | 64.52 | 61.38 | 58.79 | 64.36 | 67.99 | 53.26  | 57.85 |
| LTBP3        | 80.1  | 80.46 | 73.14 | 72.12 | 58.18 | 68.04 | 47.43  | 52.78 |
| SNRNP200     | 68.52 | 66.66 | 67.42 | 65.5  | 68.69 | 68.04 | 66.81  | 66.64 |
| STRAP        | 57.52 | 58.69 | 60.47 | 63    | 70.54 | 68.08 | 74.49  | 77.12 |
| LRRRC59      | 73.3  | 71.32 | 69.84 | 64.69 | 69    | 68.13 | 58.79  | 65.41 |
| MICALL1      | 59.16 | 61.69 | 57.87 | 54.7  | 67.39 | 68.15 | 55.5   | 60.24 |
| EBP          | 61.81 | 64.63 | 58.22 | 59.48 | 62.87 | 68.16 | 54.43  | 59.58 |
| MVB12A       | 65.25 | 67.07 | 63.17 | 58.08 | 66.73 | 68.19 | 50.04  | 56.3  |
| MRPL34       | 59.77 | 64.4  | 60.27 | 55.5  | 70.71 | 68.22 | 55.52  | 64.77 |
| MYDGF        | 64.79 | 70.36 | 62.8  | 57.53 | 64.61 | 68.29 | 49.13  | 54.25 |
| C20orf24     | 64.67 | 63.42 | 62.66 | 61.7  | 68.06 | 68.33 | 60.54  | 58.39 |
| C7orf50      | 66.27 | 73.55 | 65.17 | 57.59 | 65.07 | 68.37 | 49.52  | 51.84 |
| SLC27A1      | 71.03 | 74.73 | 67.99 | 65.54 | 63.59 | 68.42 | 53.61  | 59.95 |

|          |       |       |       |       |       |       |        |        |
|----------|-------|-------|-------|-------|-------|-------|--------|--------|
| CPSF3L   | 67.51 | 66.17 | 65.37 | 61.77 | 68.52 | 68.49 | 55.04  | 58.18  |
| SSBP4    | 72.46 | 68.26 | 63.89 | 61.26 | 62.99 | 68.63 | 48.12  | 53.83  |
| COTL1    | 64.04 | 64.81 | 59.17 | 58.89 | 72.47 | 68.81 | 59.44  | 62.09  |
| FIBP     | 72.8  | 68.82 | 66.08 | 61.66 | 71.4  | 68.89 | 60.58  | 63.04  |
| GHITM    | 57.15 | 57.77 | 58.08 | 58.34 | 72.17 | 68.95 | 75.06  | 70.55  |
| HNRNPD   | 77.14 | 77.81 | 77.26 | 75.71 | 74.42 | 68.96 | 69.81  | 70.71  |
| HNRNPH1  | 71.26 | 62.57 | 77.61 | 84.45 | 71.99 | 68.99 | 102.75 | 85.11  |
| HCFC1R1  | 61.6  | 63.61 | 59.54 | 58.67 | 70.77 | 69.09 | 50.47  | 65.05  |
| IGSF3    | 65.09 | 67.71 | 66.19 | 65.73 | 66.27 | 69.24 | 64.88  | 68.77  |
| KHSRP    | 72.29 | 72.46 | 66.99 | 67.39 | 67.41 | 69.32 | 57.87  | 59.9   |
| INSIG1   | 54.25 | 59.17 | 57.95 | 67.31 | 62.86 | 69.34 | 69.26  | 73.24  |
| HTRA1    | 71.51 | 74.47 | 65.85 | 66.99 | 61.63 | 69.43 | 58.59  | 62.53  |
| ATIC     | 64.62 | 64.73 | 62.37 | 59.46 | 70.94 | 69.53 | 69.16  | 67.68  |
| PDAP1    | 68.88 | 68.61 | 66.94 | 66.07 | 71.94 | 69.56 | 62.38  | 65.68  |
| ADAR     | 93.06 | 94.88 | 93.62 | 95.84 | 67.83 | 69.65 | 72.8   | 69.88  |
| NAPA     | 73.98 | 72.95 | 67.38 | 67.23 | 63.77 | 69.67 | 52.85  | 56.64  |
| XRN2     | 67.08 | 64.42 | 73.58 | 71.02 | 73.46 | 69.67 | 85.46  | 78.15  |
| TRIB2    | 69.07 | 72.12 | 72.69 | 78.35 | 67.14 | 69.68 | 77.32  | 76.72  |
| PXN      | 75.74 | 75.38 | 74.02 | 73.48 | 67.31 | 69.69 | 61.33  | 66.08  |
| TMED3    | 63.48 | 64.53 | 63.27 | 55.06 | 69.7  | 69.7  | 54.89  | 59.91  |
| SERPINE1 | 74.1  | 77.89 | 72.54 | 76.64 | 69.26 | 69.75 | 70.56  | 70.62  |
| SLC25A10 | 64.03 | 65.34 | 61.78 | 56.85 | 67.18 | 69.76 | 49.06  | 58.36  |
| KIAA1191 | 64.35 | 69.45 | 66.05 | 62.79 | 68.98 | 69.78 | 65.25  | 67.6   |
| BCL2L1   | 59.78 | 59.24 | 57.71 | 55.24 | 73.63 | 69.82 | 64.82  | 60.83  |
| EIF3A    | 60.75 | 54.87 | 68.63 | 78.84 | 74.65 | 69.82 | 97.88  | 90.89  |
| MAD2L2   | 73.38 | 76.23 | 68.62 | 65.54 | 74.8  | 69.85 | 53.39  | 56.72  |
| ARL6IP1  | 61.81 | 56.81 | 66.4  | 68.36 | 73.13 | 69.85 | 93.6   | 86.67  |
| COX7A2L  | 65.19 | 66.62 | 62.66 | 59.36 | 74.41 | 69.88 | 66.1   | 69.37  |
| SLC50A1  | 65.31 | 70.43 | 68.77 | 65.46 | 69.06 | 69.92 | 65.5   | 73.64  |
| CYP51A1  | 61.84 | 63.48 | 69.18 | 74.35 | 69.16 | 69.99 | 84.53  | 81.42  |
| YIF1A    | 64.58 | 65.46 | 59.61 | 57.1  | 71.51 | 70    | 56.12  | 56.36  |
| SNX5     | 58.7  | 58.4  | 65.88 | 68.95 | 71.13 | 70.01 | 92.41  | 77.61  |
| CYGB     | 53.77 | 51.44 | 52.69 | 46.47 | 75.11 | 70.12 | 63.78  | 62.55  |
| FAM234A  | 74.77 | 76.57 | 72.03 | 68.44 | 68.16 | 70.35 | 55.16  | 62.39  |
| RCC2     | 66.54 | 71.3  | 72.15 | 70.44 | 71.83 | 70.35 | 66.04  | 67.91  |
| AKT1S1   | 58.34 | 58.23 | 52.45 | 53.02 | 65.3  | 70.43 | 54.25  | 56.87  |
| GPI      | 77.47 | 78.13 | 72.21 | 70.49 | 67.33 | 70.54 | 59     | 64.04  |
| LSS      | 55.86 | 64.84 | 54.72 | 56.58 | 65.46 | 70.54 | 55.99  | 64.79  |
| FAM83H   | 64.29 | 63.42 | 60.65 | 56.68 | 66.66 | 70.61 | 52.98  | 58.85  |
| AUP1     | 68.84 | 64.16 | 63.34 | 62.08 | 73.44 | 70.67 | 63.91  | 67.11  |
| CD46     | 64.16 | 63.57 | 70.66 | 86.35 | 74.82 | 70.71 | 119.74 | 105.69 |
| BAG3     | 82.6  | 82    | 77    | 76.68 | 70.97 | 70.74 | 58.71  | 63.05  |
| CDK4     | 74.27 | 75.87 | 74.16 | 69.17 | 70.82 | 70.83 | 60.42  | 62.67  |
| LMF2     | 66.36 | 63.46 | 64.47 | 62.12 | 66.01 | 70.95 | 57.12  | 55.81  |
| CARM1    | 75.91 | 76.04 | 70.98 | 67.72 | 71.6  | 70.95 | 59.71  | 63.69  |
| COL4A5   | 75.1  | 77.9  | 78.85 | 85.66 | 65.76 | 70.97 | 82.79  | 81.52  |
| C12orf57 | 83.82 | 83.82 | 81.85 | 75.16 | 69.39 | 70.99 | 55.18  | 63.18  |
| REPIN1   | 69.28 | 70.02 | 67.19 | 66.27 | 67.26 | 71.02 | 56.65  | 64.29  |
| ID3      | 73.81 | 76.31 | 71.88 | 65.84 | 65.27 | 71.03 | 56.21  | 57     |
| GRK2     | 69.58 | 70.17 | 70.57 | 64.7  | 68.7  | 71.1  | 55.6   | 61.28  |
| PSMB5    | 68.2  | 67.25 | 64.31 | 66.72 | 72.89 | 71.15 | 62.63  | 65.75  |
| CCNL2    | 55.21 | 54.26 | 55.3  | 64.85 | 68.24 | 71.24 | 87.76  | 78.56  |
| 44261    | 65.38 | 61.38 | 71.52 | 78.6  | 71.02 | 71.26 | 93.22  | 84.89  |
| KDEL2    | 73.42 | 76.03 | 76.68 | 73.03 | 73.53 | 71.28 | 74.95  | 74.77  |
| DCTN3    | 74.54 | 74.24 | 69.15 | 65.08 | 69.81 | 71.34 | 58.81  | 61.05  |
| ACO2     | 69.26 | 71.34 | 64.17 | 59.76 | 68.9  | 71.47 | 57.18  | 63.54  |
| FAM3C    | 71.03 | 70.72 | 80.91 | 91.07 | 80.46 | 71.47 | 111.43 | 95.69  |
| MPG      | 70.76 | 69.33 | 68.91 | 62.57 | 63.79 | 71.51 | 46.55  | 55.33  |
| NCSTN    | 73.48 | 78.89 | 73.55 | 73.84 | 72.09 | 71.53 | 71.63  | 76     |
| FDXR     | 63.94 | 65.29 | 60.25 | 55.73 | 76.11 | 71.65 | 55.84  | 61.15  |
| VARS     | 65.91 | 66.94 | 61.42 | 57.52 | 66.73 | 71.73 | 53.8   | 56.62  |
| GSN      | 87.92 | 88.96 | 83.48 | 79.66 | 68.15 | 71.78 | 57.68  | 63.19  |
| PRAF2    | 66.93 | 73.1  | 69.04 | 66.04 | 66.55 | 71.8  | 56.89  | 64.58  |
| ECI1     | 74.64 | 72.6  | 70.32 | 60.26 | 70.14 | 71.93 | 48.59  | 55.39  |
| MTSS1L   | 80.55 | 79.54 | 76.73 | 74.75 | 71.93 | 72    | 57.96  | 69.83  |
| HLA-B    | 87.36 | 92.47 | 90.01 | 77.46 | 73.02 | 72.01 | 62.05  | 60.49  |
| NDUFB8   | 66.31 | 65.94 | 66.42 | 65.5  | 68.37 | 72.07 | 61.02  | 61.49  |
| YIPF3    | 71.93 | 74.47 | 71.3  | 66.66 | 72.77 | 72.08 | 60.42  | 67.17  |
| STAU1    | 73.42 | 71.97 | 75.98 | 75.28 | 75.34 | 72.13 | 76.1   | 76.11  |
| ATP6V1E1 | 63.03 | 59.69 | 65.39 | 68.92 | 74.29 | 72.14 | 84.04  | 79.71  |
| ERGIC1   | 73.7  | 80.08 | 74.27 | 73.58 | 73.83 | 72.16 | 66.15  | 69.68  |
| NDUFA4   | 66.84 | 66.1  | 65.83 | 64.65 | 78.58 | 72.28 | 78.04  | 73.83  |
| SKP1     | 77.49 | 75.37 | 78.86 | 78.35 | 78.4  | 72.48 | 86.25  | 84.31  |
| ESD      | 69.71 | 73.52 | 73.39 | 69.29 | 70.07 | 72.49 | 82.08  | 77.68  |
| BOP1     | 62.64 | 60.62 | 58.87 | 53.92 | 71.67 | 72.56 | 50.47  | 55.58  |
| ATXN2L   | 76.19 | 74.99 | 74.17 | 72.47 | 69.79 | 72.63 | 64.01  | 68.54  |
| TK1      | 87.49 | 82.21 | 78.4  | 72.51 | 74.7  | 72.68 | 53.19  | 54.86  |
| HSPA4    | 67.62 | 61.71 | 74.42 | 76.7  | 77.4  | 72.73 | 89.41  | 84.82  |
| HSD17B10 | 71.71 | 71.22 | 66.84 | 63.88 | 75.49 | 72.79 | 61.86  | 62.99  |
| UFD1L    | 67.88 | 67.69 | 68.13 | 64.05 | 72.46 | 72.8  | 66.52  | 64.5   |
| HGS      | 77.06 | 69.7  | 71.72 | 67    | 71.25 | 72.85 | 58.05  | 62     |
| CSNK1E   | 71.62 | 73.91 | 73.63 | 73.73 | 73.57 | 72.96 | 69.95  | 69.84  |
| PFKL     | 85.92 | 85.24 | 80.48 | 73.67 | 69.04 | 73.01 | 54.48  | 59.47  |
| TPP1     | 76.8  | 82.02 | 79.84 | 80.97 | 74.71 | 73.03 | 75.98  | 80.48  |
| TYMS     | 73.08 | 68.2  | 68.19 | 67.37 | 75.59 | 73.14 | 69.56  | 68.61  |
| THBS1    | 81.13 | 76.44 | 84.16 | 89.26 | 71.98 | 73.15 | 80.64  | 77.74  |
| PSMD2    | 72.78 | 73.41 | 71.33 | 69.14 | 71.32 | 73.16 | 63.46  | 66.97  |



|              |        |        |        |        |       |       |        |       |
|--------------|--------|--------|--------|--------|-------|-------|--------|-------|
| PPM1G        | 69.15  | 70.27  | 67.39  | 65.61  | 75.5  | 73.19 | 68.61  | 69.56 |
| IARS         | 67.63  | 64.46  | 69.01  | 68.26  | 75.53 | 73.28 | 86.74  | 79.96 |
| PSMD13       | 67.48  | 72.6   | 68.72  | 65.98  | 72.74 | 73.38 | 65.03  | 63.86 |
| UQCRO        | 70.43  | 73.43  | 70.48  | 67.7   | 78.18 | 73.38 | 64.67  | 67.2  |
| NDUFA7       | 70.58  | 73.36  | 64.45  | 70.26  | 66.8  | 73.43 | 61.89  | 62.59 |
| PSMB1        | 76.71  | 76.64  | 80.7   | 75.96  | 78.5  | 73.43 | 80.64  | 77.7  |
| LAMTOR5      | 71.1   | 73.47  | 73.24  | 74.11  | 79.59 | 73.51 | 85.62  | 80.21 |
| HEXB         | 73.31  | 65.72  | 73.94  | 74.76  | 74.17 | 73.65 | 81     | 77.37 |
| PRDX3        | 62.39  | 59.4   | 65.4   | 71.85  | 76.44 | 73.7  | 98.35  | 88.19 |
| UFC1         | 55.69  | 58.61  | 61.33  | 60.19  | 76.79 | 73.73 | 74.29  | 73.11 |
| TRAF7        | 74.3   | 70.78  | 69.26  | 67.99  | 73.23 | 73.79 | 61.38  | 66.69 |
| CSAG3        | 65.63  | 70.09  | 70.93  | 66.97  | 74.11 | 73.8  | 75.9   | 75.18 |
| MCAM         | 71.96  | 73.17  | 74.97  | 74.83  | 73.97 | 73.89 | 66.51  | 68.46 |
| ARF4         | 77.49  | 78.95  | 79.82  | 81.84  | 77.9  | 73.89 | 82.56  | 83.64 |
| SNF8         | 69.95  | 75.75  | 70.28  | 66.01  | 71.73 | 73.95 | 66.28  | 66.33 |
| NDUFAB1      | 75.02  | 74.66  | 76.57  | 68.75  | 79.05 | 74.08 | 74.24  | 73.29 |
| PODXL2       | 78.04  | 75.83  | 74.75  | 69.08  | 74.31 | 74.16 | 59.29  | 65.3  |
| C14orf166    | 68.7   | 70.94  | 71.88  | 69.42  | 75.11 | 74.2  | 88.95  | 78.06 |
| SF3B4        | 87.72  | 87.48  | 82.54  | 75.97  | 78.05 | 74.3  | 62.39  | 69.07 |
| MAF1         | 78.16  | 80.03  | 74.57  | 66.85  | 76.73 | 74.31 | 58.36  | 63.98 |
| SNRPG        | 70.54  | 81.39  | 76.44  | 79.89  | 76.69 | 74.38 | 81.25  | 85.57 |
| SNX17        | 73.53  | 75.36  | 71.06  | 66.67  | 72.69 | 74.48 | 60.34  | 64.49 |
| NDUFB5       | 65.17  | 65.7   | 69.55  | 71.25  | 78.52 | 74.5  | 86.84  | 76.64 |
| KHDRBS1      | 80.43  | 75.16  | 82.1   | 78.55  | 79.27 | 74.62 | 82.43  | 75.58 |
| TMED4        | 73.76  | 72.41  | 71.01  | 68.53  | 73.73 | 74.65 | 76.22  | 75.28 |
| HOMER3       | 68.74  | 72.43  | 68.69  | 64.81  | 72.78 | 74.66 | 56.19  | 61.93 |
| ARPC4        | 77.85  | 81.57  | 73.44  | 71.72  | 77.79 | 74.78 | 64.93  | 69.33 |
| SEMA4B       | 98.24  | 95.45  | 92.18  | 87.91  | 67.36 | 74.83 | 60.3   | 67.57 |
| FXR1         | 64.3   | 57.99  | 74.82  | 85.73  | 77.27 | 74.89 | 112.43 | 98.74 |
| CEBPB        | 75.96  | 72.43  | 67.88  | 62.92  | 66.7  | 74.99 | 50.2   | 55.56 |
| NOTCH1       | 80.75  | 77.47  | 76.51  | 75.16  | 66.85 | 75.08 | 59.59  | 64.16 |
| FLII         | 74.15  | 74.1   | 69.78  | 69.35  | 72.57 | 75.12 | 61.86  | 65.89 |
| GALNT2       | 77.3   | 79.91  | 74.74  | 76.75  | 75.55 | 75.24 | 66.68  | 71.14 |
| IDH3B        | 70.99  | 70.61  | 72.08  | 64.21  | 75.24 | 75.34 | 66.09  | 67.52 |
| CAV1         | 62.79  | 59.79  | 70.01  | 72.51  | 79.57 | 75.34 | 100.92 | 86.87 |
| MRPS15       | 71.22  | 73.11  | 69.54  | 67.61  | 78.59 | 75.52 | 76.51  | 73.64 |
| SF1          | 84.54  | 84.94  | 81.78  | 80.5   | 75.16 | 75.53 | 67.18  | 70.89 |
| ERP29        | 73.44  | 80.04  | 74.78  | 73.03  | 83.9  | 75.62 | 69.94  | 79.78 |
| RHBDD2       | 79.31  | 81.37  | 74.34  | 71.08  | 72.25 | 75.76 | 56.3   | 64.72 |
| SNRNP70      | 79.61  | 82.2   | 79.15  | 76.65  | 76.87 | 75.84 | 60.86  | 70.95 |
| DCTN1        | 76.53  | 78.56  | 73.76  | 70.5   | 75.46 | 75.85 | 64.95  | 69.74 |
| CD320        | 73.91  | 73.41  | 70.98  | 64.36  | 73.84 | 75.91 | 55.74  | 63.49 |
| RHOT2        | 63.85  | 62.07  | 60.71  | 57.17  | 70.16 | 76.03 | 66.33  | 66.95 |
| USP22        | 76.58  | 76.86  | 75.47  | 73.3   | 75.69 | 76.07 | 70.23  | 74.46 |
| MIEN1        | 73.7   | 76.02  | 70.82  | 72.26  | 74.63 | 76.08 | 64.5   | 68.22 |
| DCTPP1       | 76.18  | 72.4   | 69.49  | 65.13  | 76.69 | 76.17 | 62.52  | 65.77 |
| YIF1B        | 76.79  | 82.22  | 75.35  | 66.1   | 73.3  | 76.31 | 54.33  | 62.06 |
| ADGRG1       | 79.27  | 80.01  | 76.86  | 77.68  | 73.02 | 76.31 | 67.53  | 73.67 |
| SERPINE2     | 70.28  | 71.42  | 70.72  | 72.55  | 74.59 | 76.33 | 80.11  | 81.52 |
| UXT          | 77.81  | 84.6   | 76.67  | 76.65  | 76.67 | 76.41 | 68.96  | 65.51 |
| ERI3         | 79.91  | 76.04  | 74.05  | 68.06  | 80.6  | 76.51 | 68.05  | 69.02 |
| DHPS         | 72.98  | 76.43  | 70.63  | 63.43  | 74.8  | 76.53 | 66.02  | 66.76 |
| C1orf122     | 69.48  | 66.45  | 62.38  | 60.65  | 73.75 | 76.55 | 52.12  | 55.83 |
| LOC107986035 | 88.28  | 89.06  | 84.77  | 74.12  | 54.14 | 76.65 | 48.57  | 53.66 |
| MAPRE1       | 75.15  | 73.75  | 73.96  | 72.07  | 79.73 | 76.75 | 81.37  | 78.31 |
| LRP5         | 90.75  | 93.55  | 85.79  | 84.1   | 70.88 | 76.97 | 58.73  | 66.69 |
| DNAJC5       | 77.61  | 79.46  | 75.33  | 71.97  | 74.19 | 77.07 | 63.46  | 69.21 |
| AKR1A1       | 80.4   | 89.2   | 79.05  | 75.19  | 79.26 | 77.14 | 69.27  | 72.33 |
| CTSH         | 72.1   | 73.22  | 68.33  | 70.98  | 74.92 | 77.55 | 68.16  | 66.25 |
| LDB1         | 75.53  | 77.73  | 74.18  | 74.75  | 76.94 | 77.55 | 69.38  | 73.01 |
| CNP          | 96.33  | 102.06 | 94.32  | 89.93  | 75.13 | 77.66 | 64.73  | 70.99 |
| MMP2         | 123.62 | 128.32 | 116.18 | 123.36 | 68.69 | 77.69 | 63.08  | 73.52 |
| PTTG1        | 76.64  | 70.75  | 74.59  | 67.44  | 79.63 | 77.75 | 89.37  | 81.96 |
| MVD          | 66.23  | 69.49  | 62.61  | 61.24  | 72.65 | 77.93 | 55.41  | 68.67 |
| DPP7         | 78.6   | 77.87  | 74.86  | 64.9   | 76.97 | 77.97 | 61.37  | 66.82 |
| STX10        | 69.35  | 69.07  | 68.04  | 64.08  | 78.17 | 78.02 | 66.77  | 69.91 |
| SCRIB        | 67.12  | 65.88  | 62.53  | 58.78  | 73.32 | 78.07 | 58.52  | 64.57 |
| SLC20A1      | 73.37  | 78.37  | 77.14  | 78.92  | 78.69 | 78.07 | 88.72  | 83.39 |
| TAPBP        | 83.49  | 88.52  | 77.59  | 80.27  | 68.91 | 78.09 | 64.52  | 72.99 |
| FKBP9        | 100.28 | 103.33 | 96.61  | 101.41 | 74.56 | 78.1  | 77     | 79.26 |
| SARAF        | 70.61  | 70.02  | 74.49  | 82.64  | 77.88 | 78.11 | 96.59  | 89.58 |
| ATP2A2       | 70.6   | 71.54  | 71.83  | 72.75  | 74.42 | 78.13 | 76.56  | 75.12 |
| PFDN2        | 72.71  | 73.43  | 76.44  | 82.26  | 81.4  | 78.17 | 82.3   | 81.75 |
| SCAMP3       | 73.9   | 76.5   | 72.39  | 69.17  | 76.69 | 78.28 | 64.36  | 68.85 |
| FBLIM1       | 91.13  | 95.47  | 90.31  | 87.53  | 76.97 | 78.28 | 69.77  | 75.21 |
| MAT2A        | 68.3   | 69.6   | 71.78  | 75.42  | 81.69 | 78.32 | 97.13  | 88.57 |
| SERF2        | 77.64  | 84.13  | 73.92  | 73.5   | 77.44 | 78.33 | 66.42  | 66.29 |
| MCRIP1       | 76.88  | 77.7   | 73.45  | 69.28  | 76.38 | 78.35 | 57.6   | 60.83 |
| PSMA1        | 79.96  | 79.76  | 82.48  | 83.74  | 85.21 | 78.53 | 99.92  | 94.18 |
| TNFRSF10B    | 67.33  | 69.13  | 69.35  | 71.3   | 80.88 | 78.54 | 84.1   | 84.18 |
| APEH         | 74.42  | 75.51  | 70.5   | 66.54  | 75.4  | 78.74 | 65.54  | 67.18 |
| BTBD2        | 84.97  | 84.41  | 79.37  | 74.06  | 71.29 | 78.75 | 55.77  | 64.24 |
| CHD4         | 95.85  | 96.2   | 97.02  | 94.17  | 77.51 | 78.8  | 75.8   | 79.76 |
| KIAA0040     | 74.18  | 75.9   | 75.28  | 75.87  | 78.17 | 78.89 | 81.21  | 84.3  |
| HNRNPA0      | 82.75  | 81.09  | 79.31  | 77.28  | 78.71 | 78.91 | 60.84  | 70.61 |

|          |        |        |       |       |       |       |        |        |
|----------|--------|--------|-------|-------|-------|-------|--------|--------|
| TNFRSF1A | 78.96  | 84.25  | 76.26 | 76.98 | 75.21 | 78.96 | 66.13  | 72.75  |
| PPP2R1A  | 85.99  | 90.07  | 80.47 | 75.58 | 73.93 | 79.03 | 64.75  | 68.71  |
| ARPC5    | 81.24  | 81.78  | 83.8  | 82.64 | 84.21 | 79.2  | 87.52  | 82.99  |
| SRI      | 77.1   | 76.93  | 73.5  | 76.28 | 79.74 | 79.3  | 80.38  | 77.66  |
| NEDD8    | 80.43  | 86.08  | 76.56 | 78.26 | 87.85 | 79.33 | 79.11  | 83.46  |
| NDUFA3   | 86.06  | 86.92  | 88.21 | 76.44 | 86.68 | 79.44 | 64.06  | 73.51  |
| AARS     | 89.95  | 94.71  | 89.06 | 86.07 | 82.14 | 79.45 | 73.2   | 76.9   |
| GSS      | 65.16  | 69.11  | 63.62 | 62.49 | 81.79 | 79.51 | 75.45  | 71.56  |
| EIF4A3   | 85.09  | 78.34  | 78.14 | 78.77 | 75.64 | 79.61 | 68.86  | 67.76  |
| CKAP4    | 95.37  | 92.21  | 87.52 | 86.89 | 77.06 | 79.77 | 70.4   | 75.97  |
| COPZ1    | 78.3   | 82.63  | 80.9  | 80.99 | 83.84 | 79.77 | 84.08  | 82.13  |
| INF2     | 76.21  | 79.59  | 73.34 | 69.29 | 73.74 | 79.92 | 59.97  | 69.56  |
| ATOX1    | 76.12  | 77.56  | 74.54 | 68.91 | 82.66 | 79.95 | 66.12  | 77.42  |
| SEC11A   | 83.12  | 78.85  | 85.44 | 83.32 | 89.66 | 79.96 | 92.89  | 92.29  |
| GBA      | 68.91  | 73.24  | 71.88 | 71.17 | 77.61 | 80.13 | 74.76  | 72.33  |
| CDC42    | 86.87  | 85.49  | 87.58 | 90.99 | 86.38 | 80.17 | 96.43  | 89.29  |
| NT5C3B   | 73.17  | 73.42  | 68.79 | 69.59 | 82.97 | 80.2  | 73.04  | 73.54  |
| BRK1     | 83.36  | 80.22  | 84.33 | 84.76 | 82.65 | 80.22 | 82.79  | 83.31  |
| PRKACA   | 84.03  | 86.65  | 83.37 | 81.96 | 82.92 | 80.34 | 72.22  | 80.96  |
| POLR1D   | 79.52  | 79.25  | 78.08 | 75.81 | 85.31 | 80.38 | 84.13  | 82.05  |
| ITPA     | 74.31  | 73.14  | 71.59 | 68.69 | 80.93 | 80.47 | 71.95  | 70.71  |
| C16orf13 | 82.17  | 79.08  | 78.01 | 64.36 | 75.95 | 80.55 | 63.98  | 69.15  |
| NME3     | 88.7   | 83.7   | 76.35 | 70.48 | 72.1  | 80.67 | 58.4   | 62.48  |
| TPD52L2  | 77.84  | 76.26  | 75.51 | 71.62 | 79.92 | 80.73 | 72.98  | 75.21  |
| ATRAID   | 89.52  | 96.88  | 83.41 | 83.11 | 81.98 | 80.76 | 70.56  | 69.9   |
| CIB1     | 80.36  | 81.55  | 80.86 | 74.74 | 84.36 | 80.95 | 69.44  | 67.73  |
| HK1      | 78.66  | 80.44  | 76.77 | 74.49 | 80.53 | 81.01 | 70.16  | 75.59  |
| RBCK1    | 83.5   | 82.78  | 84.58 | 80.24 | 79.34 | 81.05 | 67.92  | 72.42  |
| RBMX     | 83.21  | 77.98  | 81.91 | 90.29 | 86.11 | 81.05 | 101.37 | 88.56  |
| NME4     | 92.13  | 95.86  | 90.16 | 83.18 | 79.38 | 81.21 | 62     | 74.31  |
| DAZAP2   | 82.61  | 82.63  | 84.51 | 83.12 | 86.71 | 81.27 | 88.14  | 85.37  |
| MRPL43   | 78.02  | 76.21  | 77.54 | 74.96 | 85.18 | 81.45 | 60.73  | 74     |
| CTDSP2   | 85.42  | 87.53  | 86.52 | 87.67 | 83.38 | 81.53 | 82.6   | 83.91  |
| NOMO2    | 82.25  | 93.08  | 80.28 | 90.31 | 79.41 | 81.58 | 77.99  | 81.12  |
| VAT1     | 77.41  | 88.14  | 79.42 | 74.6  | 81.66 | 81.6  | 62.59  | 75.63  |
| DAZAP1   | 80.1   | 76.55  | 75.97 | 73.09 | 77.32 | 81.61 | 69.72  | 68.1   |
| UBXN6    | 81.39  | 79.91  | 76    | 72    | 78.69 | 81.62 | 61.51  | 69.31  |
| NDUFS2   | 80.29  | 86.33  | 80.06 | 79.26 | 82.91 | 81.73 | 78.51  | 82.61  |
| IFI30    | 81.76  | 79.34  | 79.54 | 77.47 | 81.25 | 81.74 | 65.82  | 71.18  |
| DDX39B   | 86.93  | 82.11  | 83.41 | 81.56 | 86.04 | 81.74 | 87.59  | 82.52  |
| LUZP6    | 76.73  | 67.33  | 81.34 | 87.22 | 91.49 | 81.98 | 111.03 | 97.94  |
| AP2S1    | 78.49  | 89.64  | 78.83 | 74.28 | 80.7  | 82.05 | 65.93  | 67.43  |
| F2R      | 83.75  | 74     | 91.42 | 97.78 | 89.71 | 82.17 | 113.21 | 92.35  |
| CCNI     | 84.94  | 90.86  | 86.18 | 83.69 | 85.34 | 82.26 | 86.15  | 87.1   |
| JUNB     | 79.09  | 82.4   | 73.91 | 70.06 | 75.43 | 82.33 | 57.09  | 63.84  |
| LRRC8A   | 72.96  | 72.68  | 69.13 | 70.15 | 81.06 | 82.33 | 69.46  | 74.06  |
| WBP1     | 80.74  | 84.08  | 76.15 | 74.15 | 80.01 | 82.49 | 66.92  | 70.56  |
| ZG16B    | 86.44  | 107.75 | 94.09 | 84.71 | 77.28 | 82.5  | 60.99  | 76.1   |
| EIF2S2   | 74.98  | 71.39  | 80.69 | 89.3  | 87.85 | 82.66 | 111.54 | 102.92 |
| SOX2     | 80.28  | 77.01  | 80.39 | 81.44 | 78.02 | 82.73 | 72.83  | 79.98  |
| ELOVL1   | 74.78  | 79.07  | 70.72 | 68.56 | 83.46 | 82.77 | 72.92  | 75.73  |
| PSME1    | 97.54  | 99.77  | 99.43 | 85.4  | 90.96 | 82.81 | 79.94  | 84.08  |
| PRKAR1A  | 77.8   | 79.52  | 92.73 | 99.87 | 85.58 | 82.86 | 109.6  | 99.36  |
| C14orf2  | 79.22  | 82.04  | 77.28 | 78.8  | 84.75 | 83.01 | 80.52  | 85.41  |
| CCT8     | 72.73  | 69.13  | 79.62 | 84.32 | 89.45 | 83.04 | 112.84 | 98.69  |
| NRG1     | 71.69  | 66.93  | 72.17 | 77.15 | 81.78 | 83.14 | 88.28  | 85.15  |
| MRPL20   | 79.85  | 87.41  | 80.07 | 74.76 | 83.16 | 83.29 | 73.44  | 72.37  |
| SRP9     | 76.22  | 78.6   | 78.59 | 82.59 | 88.68 | 83.29 | 121.84 | 101.71 |
| FN1      | 87.84  | 91.62  | 85.51 | 94.45 | 73.11 | 83.46 | 83     | 82.24  |
| RBBP7    | 91.4   | 86.78  | 91.64 | 95.48 | 86.98 | 83.49 | 96.65  | 88.94  |
| CALU     | 84.25  | 79.73  | 89.35 | 95.65 | 93.02 | 83.6  | 109.29 | 102.53 |
| SEC61G   | 99.43  | 106.42 | 89.92 | 97.39 | 90.13 | 83.68 | 99.92  | 93.58  |
| SH3GL1   | 94.49  | 95.88  | 90.93 | 84.9  | 82.85 | 83.73 | 64.09  | 71.64  |
| MRPL28   | 83.13  | 87.45  | 85.68 | 78.95 | 82.57 | 83.74 | 64.74  | 68.47  |
| PYCR1    | 92.9   | 92.62  | 83.59 | 78.42 | 85.1  | 83.75 | 66.75  | 72.78  |
| ERH      | 82.6   | 84.96  | 88.74 | 97.99 | 89.25 | 83.83 | 94.76  | 103.46 |
| NTPCR    | 76.18  | 77.83  | 74.32 | 71.95 | 89.74 | 83.89 | 78.39  | 82.21  |
| MAP4     | 91.63  | 93.25  | 89.34 | 89.3  | 85.82 | 83.91 | 78.49  | 83.97  |
| FXD5     | 87.2   | 88.82  | 82.8  | 81.59 | 85.22 | 84.02 | 71.7   | 73.1   |
| NSMCE1   | 88.05  | 83.71  | 84.78 | 79.52 | 88.42 | 84.03 | 76.93  | 79.22  |
| UBAP2L   | 89     | 90.35  | 87.5  | 90.78 | 87.85 | 84.07 | 86.21  | 86.44  |
| TXNDC5   | 83.22  | 77.23  | 81.2  | 79.16 | 86.89 | 84.1  | 83.08  | 81.33  |
| NOC2L    | 78.22  | 74.27  | 74    | 68.3  | 83.93 | 84.23 | 66.83  | 71.77  |
| 44441    | 77.61  | 72.05  | 81.47 | 89.71 | 86.2  | 84.25 | 109.09 | 97.29  |
| WASH1    | 81.6   | 73.67  | 77.22 | 77.79 | 86.11 | 84.33 | 80.27  | 82.68  |
| HADHA    | 83.63  | 83.73  | 83.93 | 76.8  | 88.09 | 84.52 | 83.65  | 83.4   |
| IRF2BP2  | 87.03  | 84.1   | 86.38 | 83.65 | 78.58 | 84.53 | 76.17  | 76.74  |
| UBXN1    | 83.64  | 82.83  | 77.15 | 72.58 | 91.43 | 84.54 | 68.11  | 80.79  |
| SLC1A5   | 87.64  | 90.98  | 84.98 | 80.3  | 82.88 | 84.58 | 68.01  | 73.81  |
| TM7SF3   | 71.63  | 66.7   | 74.69 | 72.57 | 87.52 | 84.58 | 93.72  | 84.75  |
| GOT2     | 72.06  | 78.44  | 75.48 | 68.86 | 86.09 | 84.67 | 84.84  | 78.71  |
| SRSF7    | 80.11  | 75.55  | 77.37 | 83.97 | 87.28 | 84.75 | 106.11 | 92.55  |
| TRAPPC5  | 82.74  | 82.89  | 75.98 | 68.25 | 76.12 | 84.94 | 51.23  | 62.75  |
| PSMC3    | 83.02  | 80.19  | 80.55 | 77.81 | 88.8  | 85.22 | 76.81  | 78.66  |
| PA2G4    | 78.41  | 77.12  | 78.03 | 72.74 | 90.71 | 85.27 | 82.11  | 85.18  |
| PMEP1A   | 90.21  | 90.82  | 88.6  | 89.46 | 84.58 | 85.58 | 74.87  | 75.56  |
| MAGED2   | 100.51 | 108.72 | 98.65 | 96    | 84.65 | 85.58 | 76.37  | 79.88  |
| OGFR     | 98.51  | 97.98  | 92.24 | 89.08 | 86.18 | 85.64 | 69.83  | 71.62  |

|          |        |        |        |        |        |       |        |        |
|----------|--------|--------|--------|--------|--------|-------|--------|--------|
| CDK2AP2  | 100.49 | 99.72  | 94.81  | 86.25  | 84.69  | 85.7  | 65.64  | 79.1   |
| SLC35B2  | 82.62  | 88.92  | 79.48  | 77.61  | 82.44  | 85.79 | 70.73  | 77.93  |
| NOP56    | 78.87  | 79.95  | 81.33  | 76.61  | 94.28  | 85.91 | 89.91  | 87.32  |
| PRNP     | 84.29  | 77.97  | 93.23  | 101    | 92.51  | 85.91 | 119.95 | 103.73 |
| U2AF2    | 86.85  | 86.41  | 83.25  | 80.1   | 85.98  | 85.97 | 70.68  | 74.34  |
| HNRNPF   | 86.2   | 84.68  | 88.67  | 85.44  | 93.49  | 86.02 | 89.92  | 86.94  |
| NENF     | 81.12  | 88.04  | 73.49  | 75.23  | 81.95  | 86.03 | 63.83  | 65.91  |
| TRAP1    | 80.64  | 77.76  | 79.46  | 72.43  | 86.47  | 86.09 | 75.72  | 75.2   |
| FARSA    | 79.84  | 79.77  | 76.26  | 75.23  | 87.13  | 86.29 | 63.77  | 74.48  |
| GAGE12G  | 67.24  | 69.19  | 62.71  | 63.86  | 82.91  | 86.3  | 72.3   | 66.58  |
| VKORC1   | 93.72  | 94.82  | 90.81  | 84.63  | 81.76  | 86.37 | 67.45  | 71.33  |
| RTFDC1   | 85.01  | 84.66  | 86.41  | 86.24  | 90.9   | 86.4  | 83.74  | 85.81  |
| ERF      | 100.53 | 100.18 | 97.05  | 93.64  | 86.63  | 86.8  | 64.58  | 74.34  |
| WASF2    | 103.49 | 102.7  | 100.09 | 97.88  | 86.93  | 86.8  | 81.42  | 86.9   |
| PTTG1IP  | 88.7   | 88.58  | 89.19  | 83.07  | 86.09  | 86.88 | 81.29  | 85.66  |
| MGAT1    | 94.39  | 96.64  | 92.8   | 87.67  | 82.27  | 87.03 | 66.85  | 75.14  |
| CSNK1A1  | 82.47  | 75.08  | 89.9   | 92.89  | 87.88  | 87.25 | 104.35 | 94.05  |
| NDUFS7   | 84.25  | 79.68  | 75.46  | 69.14  | 80.36  | 87.33 | 57.51  | 65.35  |
| JTB      | 84.15  | 83.94  | 81.77  | 74.87  | 84.86  | 87.47 | 78.02  | 76.57  |
| NAA10    | 75.91  | 74.23  | 72.57  | 67.68  | 85.53  | 87.53 | 64.37  | 73.96  |
| PRR13    | 92.31  | 91.86  | 87.93  | 89.88  | 97.11  | 87.54 | 86.76  | 98.21  |
| BGN      | 122.04 | 128.65 | 115.4  | 113.29 | 84.16  | 87.59 | 71.04  | 80.84  |
| CAPN2    | 71.52  | 70.76  | 73.36  | 75.15  | 86.5   | 87.61 | 93.13  | 86.96  |
| PRRC2A   | 89.05  | 91.72  | 87.83  | 88.23  | 84.1   | 87.75 | 75.2   | 81.98  |
| CCT2     | 82.16  | 78.31  | 83.23  | 79.77  | 93.53  | 87.77 | 96.38  | 90.11  |
| ABHD12   | 88.1   | 89.54  | 87.3   | 84.65  | 80.71  | 87.78 | 70.04  | 75.74  |
| KPNA2    | 69.39  | 67.41  | 69.43  | 67.57  | 90.73  | 87.92 | 100.24 | 97.01  |
| CCDC85B  | 77.13  | 73.11  | 69.04  | 65.07  | 73.65  | 87.96 | 52.64  | 60.82  |
| MGST3    | 89.47  | 94.72  | 96.48  | 87.01  | 91.47  | 88.03 | 89.26  | 87.94  |
| PGF      | 105.45 | 99.24  | 95.17  | 86.43  | 86.15  | 88.11 | 70.54  | 75.78  |
| NELFCD   | 85.15  | 85.96  | 83.5   | 82.3   | 91.33  | 88.17 | 88.09  | 86.65  |
| MRPS24   | 89.31  | 90.77  | 82.32  | 74.36  | 83.31  | 88.25 | 68.59  | 75.09  |
| MAP7D1   | 92.38  | 90.31  | 88.1   | 81.29  | 82.62  | 88.38 | 64.99  | 73.35  |
| HNRNPU   | 98.28  | 92.09  | 104.65 | 105.6  | 93.78  | 88.49 | 102.15 | 96.34  |
| COPG1    | 90.67  | 94.66  | 88.51  | 84.83  | 88.49  | 88.72 | 78.14  | 81.9   |
| ECE1     | 107.09 | 112.43 | 102.13 | 101.63 | 84.96  | 88.76 | 76.03  | 84.28  |
| KDELRL1  | 91.58  | 102.29 | 92.76  | 91.19  | 91.36  | 88.86 | 74.63  | 85.18  |
| SLC3A2   | 84.38  | 86.3   | 83.13  | 79.52  | 87.22  | 88.87 | 72.68  | 80.02  |
| SLX1A    | 99.62  | 103.61 | 92.65  | 82.08  | 83.79  | 88.89 | 57.9   | 67.47  |
| SLX1B    | 99.62  | 103.61 | 92.65  | 82.08  | 83.79  | 88.89 | 57.9   | 67.47  |
| F11R     | 86.06  | 90.94  | 86.04  | 83.79  | 92.26  | 88.95 | 87.84  | 91.47  |
| TOMM6    | 78.81  | 78.16  | 77.83  | 83.82  | 86.06  | 89.18 | 89.48  | 88.45  |
| ACTR1A   | 83.42  | 89.87  | 82.52  | 79.88  | 92.58  | 89.27 | 78.46  | 87.6   |
| MRPS34   | 85.81  | 86.69  | 77.04  | 74.41  | 84.07  | 89.38 | 62.79  | 73.63  |
| GALE     | 93.12  | 93.8   | 88.69  | 81.74  | 85.45  | 89.45 | 69.75  | 75.45  |
| MRPL51   | 78.02  | 80.91  | 82.98  | 83.64  | 93.85  | 89.45 | 82.78  | 88.01  |
| SMARCA4  | 88.98  | 87.93  | 84.16  | 84.42  | 83.4   | 89.53 | 73.84  | 78.23  |
| DST      | 75.83  | 72.14  | 93.04  | 112.12 | 82.32  | 89.79 | 168.88 | 145.3  |
| DUSP6    | 95.3   | 86.78  | 100.68 | 108    | 93.12  | 89.8  | 107.1  | 95.17  |
| EIF4EBP1 | 86.85  | 89.18  | 82.66  | 79.54  | 96.6   | 89.84 | 66.39  | 76.24  |
| RNPS1    | 90.98  | 90.44  | 89.48  | 87.72  | 90.75  | 89.88 | 77.54  | 80.91  |
| GADD45A  | 73.62  | 68.01  | 75.31  | 75.96  | 92.25  | 89.97 | 84.62  | 86.37  |
| AK2      | 91.87  | 88.68  | 88.04  | 86.32  | 87.08  | 90.15 | 89.57  | 85.45  |
| CSNK1D   | 93.92  | 96.47  | 91.02  | 91.93  | 89.81  | 90.25 | 75.46  | 82.34  |
| INO80E   | 81.3   | 77.87  | 77.96  | 80.24  | 88.83  | 90.39 | 77.3   | 80.35  |
| UQCRRF51 | 80.13  | 76.17  | 77.63  | 75.34  | 87.32  | 90.45 | 79.85  | 84.35  |
| JUND     | 90.45  | 95.97  | 84.86  | 82.75  | 79.39  | 90.65 | 53.47  | 67.71  |
| MPST     | 82.79  | 82.21  | 81.84  | 69.03  | 87.19  | 90.66 | 64.64  | 70.89  |
| TMEM9    | 91.78  | 97.03  | 89.94  | 82.95  | 87.79  | 90.78 | 75.23  | 79.13  |
| NUCB1    | 95.34  | 100.23 | 91.55  | 89     | 88.26  | 90.81 | 73.47  | 81.44  |
| VPS28    | 94.15  | 88.41  | 82.9   | 82.16  | 90.04  | 90.84 | 69.46  | 78.4   |
| ATP1B3   | 95.66  | 99.11  | 94.22  | 96.04  | 95.23  | 91.06 | 99.69  | 96.54  |
| NDUFB11  | 98.15  | 105.4  | 88.31  | 85.43  | 91.04  | 91.19 | 74.76  | 75.58  |
| MRPL23   | 92.75  | 88.15  | 89.19  | 80.8   | 88.54  | 91.3  | 70.35  | 68.73  |
| PXDN     | 103.24 | 104.88 | 104.13 | 106.53 | 89.15  | 91.3  | 88.13  | 93.04  |
| TUBA4A   | 96.07  | 91.76  | 87.46  | 82.12  | 88.27  | 91.32 | 71.08  | 78.38  |
| CBR1     | 84.76  | 83.48  | 85.54  | 81.39  | 85.17  | 91.48 | 72.92  | 80.39  |
| GDI2     | 91.77  | 85.2   | 93.13  | 93.41  | 100.25 | 91.66 | 107.56 | 102.2  |
| MAN2B1   | 94.28  | 100.45 | 90.06  | 87.68  | 87.31  | 91.81 | 71.06  | 80.54  |
| UBE2I    | 92.26  | 104.37 | 97.93  | 91.01  | 91.93  | 91.93 | 87.25  | 90.82  |
| SIGMAR1  | 79.52  | 79.79  | 79.48  | 75.39  | 92.17  | 92.11 | 76.72  | 82.04  |
| CENPB    | 86.92  | 84.72  | 81.09  | 75.96  | 85.73  | 92.3  | 65.37  | 74.31  |
| MFG8     | 98.42  | 103.32 | 97.44  | 99.41  | 88.22  | 92.33 | 79.23  | 84.03  |
| STUB1    | 90.36  | 91.86  | 84.03  | 79.46  | 89.05  | 92.34 | 69.46  | 78.33  |
| TUBG1    | 95.31  | 88.72  | 83.18  | 82.59  | 92.49  | 92.35 | 76.79  | 78.36  |
| TOMM20   | 81.37  | 77.43  | 88.93  | 93.21  | 96.25  | 92.36 | 117.15 | 103.19 |
| SERINC3  | 87.71  | 87.2   | 90.54  | 96.17  | 94.78  | 92.37 | 110.65 | 105.83 |
| C9orf16  | 98.28  | 99.78  | 89.68  | 83.19  | 94.81  | 92.43 | 67.29  | 74.65  |
| C19orf53 | 89.63  | 94.83  | 84.33  | 80.51  | 94.28  | 92.48 | 76.01  | 81.87  |
| FAM50A   | 84.43  | 87.59  | 85.03  | 82.45  | 96.09  | 92.63 | 83     | 88.98  |
| CTTN     | 87.33  | 86.46  | 86.99  | 93.48  | 90.31  | 92.67 | 98.19  | 103.66 |
| MORF4L2  | 96.55  | 94.31  | 102.11 | 106.59 | 96.89  | 92.77 | 116.03 | 107.54 |
| TRAPPC1  | 89.3   | 100.73 | 83.13  | 91.14  | 86.14  | 92.92 | 77.62  | 82.58  |
| ANXA5    | 92.17  | 92.41  | 93.69  | 89.32  | 95.21  | 92.98 | 96.5   | 91.84  |
| PTHLH    | 102.69 | 96.4   | 103.8  | 100.27 | 100.8  | 93.02 | 101.98 | 90.99  |
| RNPEP    | 87.92  | 90.15  | 85.74  | 82.6   | 91.84  | 93.07 | 78.87  | 85.66  |
| B4GALT2  | 81.68  | 82.09  | 78.54  | 71.02  | 88.61  | 93.13 | 70.67  | 72.53  |
| KARS     | 86.84  | 88.86  | 85.8   | 79.83  | 102.05 | 93.15 | 96.33  | 98.02  |
| ARL6IP4  | 103.28 | 104.38 | 99.95  | 91.87  | 94.05  | 93.2  | 74.3   | 83.68  |

|           |        |        |        |        |        |        |        |        |
|-----------|--------|--------|--------|--------|--------|--------|--------|--------|
| HAX1      | 98.16  | 101.96 | 95.44  | 89.4   | 93.06  | 93.36  | 92.09  | 89.39  |
| SURF4     | 98.56  | 104.14 | 97.92  | 90.05  | 95.02  | 93.37  | 82.42  | 88.92  |
| SMARCB1   | 101.93 | 102.47 | 96.39  | 91.24  | 93.79  | 93.38  | 76.01  | 84.4   |
| SARS      | 92.45  | 93.71  | 90.66  | 89.45  | 99.9   | 93.38  | 90.12  | 91.27  |
| BAX       | 73.74  | 78.77  | 74.82  | 70.28  | 93.88  | 93.45  | 75.73  | 78.07  |
| HSPE1     | 98.06  | 95.65  | 96.76  | 99.22  | 97.12  | 93.55  | 104.71 | 100.77 |
| GPRC5B    | 111.07 | 115.86 | 110.79 | 108.58 | 89.19  | 93.68  | 83.9   | 94.21  |
| IRAK1     | 85.02  | 84.99  | 82.32  | 75.51  | 91.29  | 93.81  | 73.99  | 76.87  |
| RRAGA     | 103.41 | 102.1  | 100.77 | 91.43  | 91.33  | 93.88  | 88.11  | 86.89  |
| ECHS1     | 81.84  | 82.67  | 83.52  | 76.98  | 93.31  | 94.08  | 75.67  | 87.65  |
| FST       | 40.79  | 43.5   | 45.2   | 48.75  | 93.39  | 94.16  | 103.82 | 96.85  |
| NME1-NME2 | 85.1   | 95.78  | 83.1   | 71.67  | 74.36  | 94.24  | 51.85  | 61.14  |
| UQCRC2    | 82.2   | 85.21  | 93.24  | 90.52  | 96.48  | 94.39  | 109.5  | 106.5  |
| CAPRIN1   | 101.13 | 90.49  | 103.07 | 102.62 | 98.67  | 94.47  | 112.15 | 102.47 |
| POMGNT1   | 90     | 95.3   | 89.73  | 84.65  | 93.31  | 94.67  | 80.39  | 84.69  |
| MAGEA12   | 97.41  | 89.27  | 90.08  | 89.11  | 102.79 | 94.67  | 87.49  | 94.15  |
| SF3A2     | 107.56 | 102.2  | 95.38  | 91.87  | 95.67  | 94.68  | 71.7   | 77.74  |
| ATP5C1    | 86.79  | 88.15  | 89.78  | 88.62  | 99.69  | 94.79  | 105.58 | 97.75  |
| PRPF6     | 94.86  | 99.72  | 95.45  | 89.11  | 96.82  | 94.82  | 80.4   | 85.78  |
| EIF3D     | 87.27  | 88.57  | 88.25  | 83.48  | 102.45 | 94.92  | 86.64  | 92.83  |
| BCAM      | 135.61 | 127.91 | 122.91 | 117.7  | 95.53  | 95.14  | 74.65  | 82.31  |
| ATP5F1    | 85.46  | 85.31  | 86.77  | 88.45  | 100.29 | 95.41  | 110.14 | 101.95 |
| NR2F6     | 96.95  | 94.13  | 88.14  | 82.29  | 82.35  | 95.5   | 63.17  | 71.51  |
| CARD19    | 95.87  | 100.27 | 92.76  | 81.07  | 89.48  | 95.52  | 68.68  | 75.66  |
| ITM2C     | 103.61 | 110.44 | 100.91 | 95.07  | 94.17  | 95.53  | 78.66  | 87.83  |
| CD99      | 99.87  | 106.16 | 97.61  | 96.17  | 96.06  | 95.58  | 79.48  | 86.9   |
| NDUFA1    | 98.8   | 98.39  | 93.64  | 98.74  | 93.41  | 95.58  | 88.67  | 95.65  |
| DBI       | 78.92  | 85.06  | 79.9   | 86.39  | 95.48  | 95.58  | 98.4   | 106.13 |
| ZYX       | 108.81 | 111.94 | 102.99 | 97.24  | 93.43  | 95.69  | 71.98  | 87.25  |
| ENSA      | 93.33  | 99.45  | 95.8   | 97.42  | 105.51 | 95.71  | 95.46  | 91.76  |
| UBE2C     | 83.04  | 80.24  | 83.83  | 74.49  | 101.09 | 95.82  | 93.26  | 84.51  |
| MT2A      | 234.38 | 201.38 | 198.06 | 193.22 | 108.3  | 95.94  | 86.7   | 82.04  |
| AKT1      | 99.6   | 100.54 | 95.34  | 90.97  | 92.8   | 95.96  | 75.49  | 83.35  |
| RNF181    | 103.79 | 113.91 | 103.91 | 99.01  | 98.49  | 96.01  | 88.15  | 86.8   |
| PFN2      | 108.83 | 107.48 | 104.29 | 109.37 | 105.79 | 96.12  | 110.74 | 102.87 |
| ADIPOR1   | 86.37  | 94.74  | 88.16  | 87.09  | 100.33 | 96.73  | 93.28  | 93.8   |
| RNASEH2A  | 102.36 | 99.32  | 98.57  | 91.3   | 97.31  | 96.8   | 75.8   | 80.54  |
| DCXR      | 96.89  | 98.13  | 89.12  | 79.43  | 91.66  | 96.83  | 72.82  | 71.96  |
| LSM7      | 102.22 | 88.84  | 97.78  | 97.69  | 103.9  | 96.88  | 81.13  | 79     |
| MRFAP1    | 95.21  | 96.66  | 98.91  | 99.89  | 101.15 | 96.89  | 96.42  | 100.16 |
| APH1A     | 97.44  | 105.66 | 98.39  | 92.88  | 93.6   | 96.99  | 81.81  | 89.86  |
| CTSA      | 96     | 103.46 | 95.95  | 97.73  | 98.86  | 97.1   | 85.42  | 92.73  |
| TMEM259   | 90.82  | 90.32  | 87.56  | 86.11  | 92.39  | 97.11  | 80.45  | 84.01  |
| MRPL24    | 92.99  | 95.97  | 87.77  | 81.81  | 101.43 | 97.2   | 83.34  | 83.36  |
| EPN1      | 104.16 | 106.21 | 103.49 | 94.94  | 97.42  | 97.72  | 69     | 81.86  |
| RFXANK    | 96.98  | 99.23  | 90.97  | 87.01  | 94.54  | 97.84  | 74.61  | 82.03  |
| TMEM59    | 100.74 | 93.84  | 100.47 | 101.29 | 102.92 | 97.87  | 110.15 | 103.7  |
| CIRBP     | 102.05 | 101.96 | 105.06 | 107.41 | 103.09 | 97.92  | 102.23 | 103.88 |
| NDUFB10   | 96.52  | 101.75 | 95.95  | 93.71  | 97.61  | 97.93  | 84.13  | 90.32  |
| KRTCAP2   | 92.64  | 102.28 | 102.73 | 96.77  | 97.46  | 98     | 83.99  | 90.6   |
| PPP1R35   | 94.45  | 94.74  | 91.7   | 90.71  | 91.46  | 98.03  | 71.18  | 82.54  |
| MAGEA3    | 93.87  | 91.66  | 93.52  | 92.25  | 100.38 | 98.09  | 89.36  | 95.09  |
| COPA      | 102.46 | 100.9  | 100.72 | 101.34 | 99.31  | 98.2   | 101.59 | 99.61  |
| POLR2J    | 94.94  | 96.9   | 86.61  | 91.71  | 97.83  | 98.21  | 87.29  | 95.58  |
| MDH1      | 93.38  | 94.67  | 100.47 | 98.98  | 105.21 | 98.26  | 119.55 | 117.14 |
| NAP1L4    | 95.07  | 93.18  | 99.27  | 97.42  | 100.49 | 98.38  | 97.23  | 97.08  |
| C17orf89  | 93.82  | 86.76  | 87.4   | 80.38  | 102.4  | 98.46  | 78.84  | 86.98  |
| RAB11B    | 116.25 | 109.53 | 108.18 | 103.82 | 92.65  | 98.52  | 74.88  | 80.53  |
| MAGEA6    | 93.77  | 93.47  | 90.5   | 87.96  | 101.71 | 98.57  | 90.3   | 99.23  |
| RANGAP1   | 88.96  | 87.92  | 84.16  | 78.74  | 99.26  | 98.59  | 79.51  | 86.73  |
| ST13      | 98.18  | 95.45  | 101.01 | 101.69 | 104.32 | 98.64  | 116.53 | 109.1  |
| FIS1      | 87.88  | 84.52  | 85.81  | 80.25  | 95.34  | 98.72  | 77.64  | 78.73  |
| TUBB6     | 87.72  | 85.2   | 82.49  | 80.35  | 100.17 | 98.78  | 82.02  | 83.32  |
| PHLDA1    | 98.14  | 97.66  | 99.49  | 101.56 | 95.74  | 99.08  | 93.65  | 103.05 |
| TMEM230   | 92.89  | 94.02  | 93.74  | 93.45  | 102.33 | 99.09  | 108.37 | 104.04 |
| ICAM1     | 98.83  | 106.86 | 98.62  | 95.61  | 98     | 99.4   | 91.36  | 96.36  |
| CSE1L     | 84.67  | 74.24  | 89.69  | 95.58  | 104.08 | 99.78  | 145.83 | 124.52 |
| EFHD2     | 107.41 | 110.3  | 103.48 | 92.85  | 100.54 | 99.79  | 78.45  | 82.23  |
| AP2A1     | 95.96  | 95.35  | 90.21  | 83.94  | 96.91  | 99.79  | 74.82  | 84.7   |
| CYB5R3    | 99.48  | 99.62  | 97.77  | 93.13  | 96.91  | 99.8   | 77.95  | 84.67  |
| ILF2      | 101.49 | 102.02 | 102.24 | 98.41  | 103.68 | 100.37 | 101.24 | 97.58  |
| MRPL37    | 92.56  | 96.9   | 86.42  | 86.11  | 95.45  | 100.39 | 84.27  | 88.33  |
| TPM4      | 111.75 | 102.8  | 112.29 | 114.18 | 105.19 | 100.53 | 119.12 | 107.76 |
| CLTC      | 97.4   | 87.64  | 106.69 | 108.51 | 105.55 | 100.53 | 127.85 | 116.46 |
| U2AF1     | 102.77 | 107.19 | 108.18 | 106.81 | 102.91 | 100.56 | 90.61  | 90.1   |
| AMZ2      | 87.49  | 89.13  | 85.86  | 90.97  | 101.19 | 100.7  | 103.72 | 99.89  |
| SF3B2     | 103.78 | 104.74 | 102.2  | 95.2   | 104.26 | 101.04 | 89.93  | 95.87  |
| CSNK2B    | 104.71 | 106.6  | 102.54 | 95.75  | 111.62 | 101.12 | 94.9   | 99.39  |
| SDHA      | 95.67  | 92.27  | 94.45  | 91.41  | 100.48 | 101.53 | 96.32  | 97.03  |
| FUS       | 117.74 | 111.3  | 116.01 | 112.18 | 110.47 | 101.57 | 100.38 | 96.02  |
| SEC61B    | 98.22  | 98.25  | 97.72  | 95.43  | 105.43 | 101.67 | 97.97  | 90.72  |
| ATP5I     | 108.09 | 105.51 | 102.8  | 103.41 | 108.71 | 101.77 | 96.21  | 101.07 |
| PTOV1     | 115.84 | 119.47 | 107.58 | 100    | 96.11  | 101.85 | 79.53  | 83.25  |
| PGD       | 92.26  | 100.15 | 90.67  | 87.18  | 98.94  | 101.95 | 87.44  | 95.77  |
| POLR2G    | 103.36 | 105.78 | 103.9  | 97.59  | 112.39 | 101.96 | 99.01  | 97.3   |
| SF3B5     | 95.21  | 97.76  | 91.29  | 91.16  | 100.49 | 101.98 | 81.7   | 87.19  |

|          |        |        |        |        |        |        |        |        |
|----------|--------|--------|--------|--------|--------|--------|--------|--------|
| PTRF     | 110    | 115.23 | 105.7  | 102.35 | 101.26 | 102.22 | 82.02  | 92.68  |
| TMED2    | 100.92 | 97.91  | 103.56 | 107.13 | 108.01 | 102.22 | 119.88 | 108.82 |
| LASP1    | 118.06 | 118.56 | 116.07 | 109.84 | 100.42 | 102.26 | 85.77  | 93.37  |
| RAC2     | 77.82  | 87.09  | 81.87  | 76.85  | 108.52 | 102.31 | 90.62  | 96.13  |
| UBE2V1   | 94.77  | 103.98 | 105.58 | 100.82 | 111.52 | 102.34 | 115.12 | 119.06 |
| UBE2M    | 101.35 | 107.29 | 97.35  | 94.52  | 102.47 | 102.4  | 81.45  | 86.86  |
| STMN3    | 111.37 | 107.59 | 101.31 | 95.05  | 102.48 | 102.51 | 80.12  | 88.88  |
| IFI27L2  | 114.78 | 112.57 | 107.46 | 94.33  | 92.28  | 102.76 | 76.14  | 79.46  |
| COL7A1   | 90.87  | 94.58  | 93.13  | 99.36  | 94.21  | 102.79 | 111.63 | 111.42 |
| DAP3     | 92.24  | 90.45  | 89.5   | 83.42  | 111.89 | 103.05 | 109.09 | 102.02 |
| MTCH1    | 99.67  | 99.66  | 98.66  | 90.87  | 92.32  | 103.24 | 80.35  | 90.06  |
| DNAJB6   | 104.37 | 106.65 | 102.54 | 105.89 | 110.86 | 103.43 | 117.34 | 110.44 |
| RAN      | 94.61  | 96.97  | 95.66  | 97.96  | 105.82 | 103.51 | 108.96 | 101.87 |
| NIPSNAP1 | 98.26  | 106.59 | 98.63  | 95.24  | 105.23 | 103.76 | 93.88  | 101.65 |
| CSAG1    | 96.85  | 103.57 | 96.78  | 96.49  | 106.02 | 103.83 | 91.56  | 107.57 |
| PEBP1    | 95.09  | 91.12  | 92.27  | 87.69  | 107.71 | 103.9  | 95.19  | 94.83  |
| SLC6A8   | 144.02 | 131.08 | 130.06 | 124.51 | 101.34 | 104.02 | 90.81  | 94.69  |
| RAB1B    | 106.3  | 112.85 | 105.34 | 100.28 | 104.89 | 104.1  | 79.79  | 96.14  |
| FAM127A  | 108.37 | 109.38 | 105.19 | 99.09  | 97.63  | 104.22 | 79.58  | 85.62  |
| ATP6V0E1 | 114.1  | 119.34 | 114.13 | 111.73 | 116.07 | 104.34 | 114.15 | 114.45 |
| HMGNI    | 107.95 | 110.16 | 114.56 | 108.92 | 105.87 | 104.46 | 123.31 | 116.46 |
| ZNHIT1   | 109.5  | 104.59 | 100.11 | 97.56  | 103.03 | 104.5  | 83.4   | 85.6   |
| PRDX4    | 110.51 | 109.29 | 103.06 | 100.26 | 103.6  | 104.59 | 99.1   | 98.73  |
| GNG5     | 119.21 | 121.73 | 110.54 | 108.63 | 110.01 | 104.97 | 102.66 | 95.94  |
| GPS1     | 96.12  | 92.89  | 89.81  | 82.92  | 102.25 | 105.01 | 80.78  | 84.07  |
| PDCD6    | 108    | 99.76  | 99.7   | 102.26 | 106.8  | 105.01 | 105.57 | 103.46 |
| EMC10    | 108.89 | 108.35 | 105.77 | 97.73  | 100.72 | 105.11 | 76.62  | 89.79  |
| ATP6V0B  | 93.17  | 99.45  | 88.83  | 88.1   | 109.23 | 105.18 | 87.43  | 92.26  |
| SET      | 102.15 | 91.59  | 100.89 | 102.17 | 110.17 | 105.22 | 116.1  | 110.72 |
| SSU72    | 103.91 | 105.83 | 97.88  | 97.01  | 103.35 | 105.56 | 89.85  | 89.41  |
| MAGED1   | 131.69 | 136.39 | 128.72 | 122.96 | 102.15 | 105.82 | 89.71  | 99.96  |
| SFPQ     | 114.86 | 101.94 | 108.15 | 110.58 | 103.94 | 105.96 | 98.67  | 97.02  |
| GPR153   | 77.74  | 77.98  | 75.29  | 71.23  | 96.69  | 106.09 | 79.29  | 89.73  |
| CLDN1    | 113.45 | 106.35 | 123.74 | 129.51 | 120.74 | 106.1  | 140.69 | 126.01 |
| PIN1     | 100.95 | 102.07 | 95.95  | 87.62  | 102.74 | 106.19 | 80.16  | 82.61  |
| GSTK1    | 102.18 | 104.67 | 101    | 98.98  | 112.06 | 106.62 | 98.32  | 103.96 |
| AHNAK    | 107.99 | 107.36 | 110.83 | 115.04 | 100.88 | 106.67 | 118.03 | 115.44 |
| CTNNA1   | 117.27 | 119.06 | 118.61 | 114.6  | 109.34 | 106.69 | 110.47 | 105.38 |
| XRCC5    | 107.11 | 103.7  | 111.78 | 109.34 | 115.37 | 106.72 | 126.72 | 114.56 |
| CLPTM1L  | 101.04 | 104.26 | 95.98  | 95.56  | 106.79 | 106.77 | 96.48  | 103.71 |
| C20orf27 | 89.61  | 96.23  | 90.05  | 84.38  | 104.12 | 107.04 | 82.41  | 89.87  |
| SSBP1    | 103.37 | 110.46 | 103.14 | 106.81 | 116.01 | 107.04 | 116.94 | 117.99 |
| SLC39A1  | 99.64  | 103.92 | 98.44  | 93.54  | 111.01 | 107.18 | 92.26  | 96.87  |
| CORO1B   | 106.79 | 106.68 | 97.98  | 90.49  | 98.23  | 107.33 | 74.97  | 82.52  |
| FAM210B  | 109.8  | 109.38 | 114.09 | 117.11 | 109.36 | 107.39 | 121.82 | 113.81 |
| PAFAH1B3 | 114.86 | 108.98 | 107.11 | 99.95  | 100.24 | 107.64 | 79.62  | 89.96  |
| SLC2A1   | 127.48 | 126.44 | 117.65 | 113.06 | 102.88 | 107.7  | 88.84  | 94.82  |
| PHB      | 91.73  | 98.17  | 96.49  | 82.4   | 111.89 | 107.76 | 94.55  | 97.61  |
| BUD31    | 105.75 | 107.59 | 114.59 | 102.85 | 109.04 | 107.76 | 107.44 | 103.87 |
| PERP     | 97.16  | 96.22  | 107.87 | 109.91 | 112.72 | 108.4  | 128.61 | 119.7  |
| ASNA1    | 99.73  | 104.57 | 96.3   | 91.26  | 108.44 | 108.48 | 83.21  | 92.58  |
| KXD1     | 113.34 | 109.71 | 104.15 | 101.81 | 113.39 | 108.75 | 94.08  | 98.58  |
| TUBA1A   | 112.72 | 123.81 | 112.69 | 108.32 | 106.33 | 108.81 | 92.17  | 107.17 |
| TMEM258  | 117.92 | 114.66 | 113.04 | 104.72 | 105.47 | 108.98 | 90.98  | 105.03 |
| GM2A     | 91.45  | 97.24  | 93.07  | 94.13  | 109.91 | 108.99 | 105.61 | 112.97 |
| ATP6AP1  | 103.3  | 106.37 | 98.55  | 99.27  | 101.54 | 109.11 | 91.63  | 99.9   |
| LAMP1    | 103.65 | 109.68 | 100.64 | 100.37 | 109.99 | 109.31 | 101.88 | 102.49 |
| WBSCR22  | 106.28 | 112.19 | 106.76 | 103.74 | 114.46 | 109.49 | 100.58 | 105.58 |
| ATP5L    | 107.57 | 116.19 | 106.87 | 103.82 | 111.36 | 109.5  | 98.52  | 107.12 |
| ANP32B   | 112.96 | 106.94 | 109.11 | 115.17 | 118.92 | 109.56 | 113.53 | 117.61 |
| NAA20    | 89.44  | 85.39  | 95.37  | 98.96  | 112.5  | 110.01 | 129.43 | 121.97 |
| HSPA9    | 104.27 | 99.27  | 107.9  | 103.46 | 115.96 | 110.09 | 130.83 | 124.08 |
| MAZ      | 108.07 | 108.05 | 105.58 | 96.78  | 106.93 | 110.17 | 82.32  | 92.67  |
| PSMA6    | 114.79 | 119.88 | 118.14 | 113.22 | 120.64 | 110.56 | 121.94 | 115.16 |
| LAMA5    | 108.82 | 102.3  | 103.8  | 104.25 | 100.7  | 110.71 | 94.57  | 97.75  |
| CHMP2A   | 114.65 | 117.15 | 112.43 | 108.48 | 115.9  | 110.82 | 95.49  | 100.48 |
| GLUL     | 91.58  | 103.15 | 92.73  | 89.19  | 111.91 | 110.87 | 100.81 | 113.04 |
| CRABP2   | 160.54 | 184.75 | 156.38 | 153.39 | 111.96 | 111.1  | 82.7   | 111.47 |
| NDUFB1   | 104.12 | 102.74 | 94.39  | 91.39  | 108.11 | 111.15 | 90.09  | 94.99  |
| ALYREF   | 112.99 | 109.45 | 99.36  | 94.57  | 102.32 | 111.2  | 84.44  | 79.1   |
| PSMC5    | 110.42 | 110.39 | 108.98 | 104.71 | 113.85 | 111.29 | 114.17 | 107.32 |
| RRBP1    | 127.28 | 126.11 | 129.37 | 129.44 | 104.73 | 111.38 | 102.02 | 109.33 |
| ZFP36L2  | 84.04  | 84.79  | 88.44  | 87.96  | 110.17 | 111.66 | 101.52 | 105.53 |
| TIMP1    | 125.2  | 129.02 | 116.2  | 111.52 | 109.84 | 111.79 | 91.86  | 94.72  |
| B3GAT3   | 108.53 | 107.33 | 106.17 | 97.62  | 104.84 | 112.25 | 83.75  | 95.02  |
| CREG1    | 109.56 | 105.96 | 118.95 | 124.19 | 109.47 | 112.27 | 133.54 | 126.83 |
| SRSF9    | 117.01 | 119.91 | 115.78 | 110.17 | 112.7  | 112.35 | 95.59  | 103.14 |
| PSMB7    | 112.82 | 116.11 | 108.23 | 109.3  | 121.92 | 112.36 | 116.68 | 117.49 |
| NDUFS8   | 105.77 | 110.1  | 106.79 | 85.8   | 105.88 | 112.39 | 77.84  | 85.52  |
| IFI27    | 422.94 | 442.73 | 431.33 | 363.69 | 120.63 | 112.56 | 101.19 | 78.65  |
| PCNA     | 114.62 | 104.46 | 115.79 | 120.85 | 118.67 | 112.62 | 124.58 | 112.09 |
| ITGA6    | 109.33 | 102.14 | 116.73 | 130.64 | 118.15 | 113.12 | 150.46 | 137.97 |
| PPP4C    | 113.99 | 114.17 | 106.92 | 101.62 | 107.95 | 113.25 | 83.68  | 88.68  |
| RNASEK   | 103.68 | 109.74 | 102.96 | 101.72 | 116.49 | 113.62 | 102.77 | 104.26 |
| SLC4A2   | 121.29 | 122.07 | 115.73 | 106.59 | 109.68 | 113.77 | 89.07  | 97.75  |
| NFE2L1   | 115.53 | 119.34 | 115.24 | 114.14 | 114.3  | 113.81 | 108.97 | 118.02 |
| MVP      | 126.65 | 133.36 | 120.49 | 114.04 | 108.54 | 113.82 | 88.37  | 99.15  |

|            |        |        |        |        |        |        |        |        |
|------------|--------|--------|--------|--------|--------|--------|--------|--------|
| PUF60      | 120.62 | 118.52 | 116.03 | 106.25 | 110.67 | 113.87 | 89.89  | 98.52  |
| NT5DC2     | 97.25  | 94.39  | 90.77  | 87.5   | 105.88 | 114.08 | 80.76  | 93.14  |
| STOML2     | 115.11 | 118.26 | 115.42 | 104.33 | 115.54 | 114.4  | 99.92  | 105.76 |
| PSMD8      | 111.96 | 113.45 | 109.15 | 98.96  | 114.39 | 114.83 | 99.75  | 100.81 |
| EIF4A2     | 120.6  | 122.36 | 128.49 | 138.75 | 115.3  | 114.88 | 156.46 | 145.14 |
| LAPTM4B    | 112.13 | 109.77 | 114.23 | 110.73 | 116.11 | 115.28 | 120.29 | 120.74 |
| QSOX1      | 106.18 | 108.99 | 106.34 | 103.69 | 114.69 | 115.8  | 98.82  | 103.88 |
| CERS2      | 109.33 | 111.94 | 107.56 | 104.22 | 116.38 | 115.86 | 110.59 | 113.32 |
| PHPT1      | 108.85 | 112.5  | 105.06 | 102.73 | 119.62 | 116.07 | 91.61  | 99.6   |
| GADD45GIP1 | 123.29 | 111.59 | 111.08 | 106.67 | 107.46 | 116.25 | 84.35  | 86.65  |
| DHCR7      | 91.93  | 106.62 | 91.41  | 92     | 108.97 | 116.28 | 92.64  | 107.47 |
| C1QBP      | 106    | 105.54 | 102.39 | 98.65  | 123.81 | 116.45 | 111.3  | 109.92 |
| FLOT2      | 128.81 | 131.35 | 122.41 | 116.48 | 115.71 | 116.47 | 100.81 | 108.18 |
| CDK2AP1    | 113.1  | 121.25 | 117.12 | 121.52 | 113.07 | 116.49 | 121.2  | 121.05 |
| RAB7A      | 109.09 | 115.07 | 119.13 | 120.82 | 121.77 | 116.76 | 121.4  | 131.72 |
| PRELID1    | 112.27 | 113.27 | 104.84 | 100.29 | 117.18 | 116.83 | 90.16  | 98.46  |
| TMUB1      | 115.81 | 116.01 | 106.22 | 100.28 | 115.43 | 117.1  | 81.01  | 92.1   |
| COL18A1    | 121.96 | 123.13 | 117.2  | 113.28 | 109.51 | 117.3  | 92.83  | 98.11  |
| HDAC1      | 126.91 | 129.2  | 127.94 | 120.19 | 120.75 | 117.53 | 114.67 | 112.2  |
| GRHPR      | 114.09 | 123.82 | 109.95 | 104.67 | 119.3  | 117.62 | 91.23  | 99.6   |
| USMG5      | 103.55 | 114.9  | 103.1  | 101.66 | 124.19 | 117.62 | 135.13 | 113.59 |
| COL4A2     | 125.68 | 132.84 | 123.49 | 124.76 | 110.64 | 117.68 | 102    | 107.75 |
| GPAA1      | 117.46 | 118.99 | 112.7  | 100.64 | 110.92 | 117.71 | 86.18  | 96.92  |
| ANAPC11    | 114.72 | 113.52 | 108.33 | 99.33  | 109.92 | 117.77 | 85.16  | 94.14  |
| PSMD3      | 115.44 | 115.8  | 110.79 | 101.81 | 112.87 | 117.77 | 92.51  | 99.62  |
| TBCB       | 119.3  | 125.11 | 113.55 | 106.11 | 115.4  | 117.95 | 99.02  | 99.69  |
| ASPH       | 98.42  | 92.74  | 110.1  | 136.08 | 121.97 | 117.99 | 198.26 | 172.93 |
| SRP14      | 114.59 | 119.53 | 121.22 | 119.09 | 124.5  | 118.12 | 125.95 | 125.49 |
| NINJ1      | 100.34 | 101.97 | 96.03  | 90.35  | 116.42 | 118.33 | 97.16  | 102.5  |
| ARHGAP23   | 140.06 | 138.27 | 135.33 | 134.28 | 113    | 118.37 | 97.14  | 103.54 |
| DDB1       | 105.05 | 108.94 | 103.56 | 98.94  | 121.17 | 118.45 | 108.5  | 111.08 |
| NDUFA8     | 121.35 | 124.42 | 115.51 | 114.21 | 124.7  | 118.55 | 111.86 | 122.25 |
| RPL36AL    | 125.76 | 130.94 | 130.55 | 136.45 | 125.37 | 118.62 | 141.31 | 148.27 |
| BASP1      | 148.13 | 148.98 | 146.03 | 142.04 | 117.24 | 118.81 | 105.84 | 113.24 |
| PLOD3      | 121.53 | 128.32 | 114.77 | 113.08 | 111.06 | 119.11 | 90.74  | 103.02 |
| LIPA       | 106.6  | 107.92 | 106.75 | 108.94 | 128.12 | 119.14 | 139.88 | 125.7  |
| PGLS       | 112.42 | 110.79 | 107.21 | 96.76  | 111.28 | 119.75 | 88.3   | 97.43  |
| CAST       | 124.36 | 117.94 | 128.92 | 134.38 | 123.33 | 119.79 | 143.46 | 137.05 |
| COMT       | 112.15 | 110.86 | 108.79 | 103.23 | 113.59 | 119.81 | 91.54  | 98     |
| WDR83OS    | 123.92 | 118.52 | 112.67 | 106.54 | 116.51 | 120.02 | 105.54 | 101.56 |
| TMEM132A   | 122.69 | 125.19 | 116.01 | 109.62 | 108.64 | 120.33 | 84.61  | 99.12  |
| POLD2      | 127.16 | 129.95 | 115.35 | 113.52 | 112.55 | 120.4  | 89.06  | 101.46 |
| IFITM1     | 396.81 | 417.22 | 373.63 | 390.13 | 124.03 | 120.43 | 115.63 | 106.84 |
| TSPAN3     | 103.54 | 107.25 | 112.94 | 115.03 | 127.36 | 120.61 | 148.58 | 141.65 |
| CAPZB      | 131.51 | 140.62 | 122.35 | 123.97 | 126.26 | 120.77 | 108.47 | 118.17 |
| SYPL1      | 104.41 | 106.66 | 111.19 | 115.65 | 125.34 | 120.98 | 158.36 | 149.41 |
| NOMO1      | 114.06 | 120.02 | 116.43 | 113.99 | 115.33 | 121.16 | 118.18 | 120.66 |
| SNRPD2     | 127.58 | 134.81 | 118.26 | 112.79 | 126.98 | 121.4  | 112.61 | 111.89 |
| CSTB       | 106.38 | 112.73 | 111.35 | 110.17 | 120.34 | 121.42 | 107.23 | 104.21 |
| CKS1B      | 117.99 | 125.12 | 122.47 | 119.89 | 126.52 | 121.47 | 117.88 | 118.12 |
| MYC        | 90.76  | 87.99  | 89.47  | 86.58  | 131.45 | 121.55 | 112.35 | 113.72 |
| OS9        | 127.88 | 132.49 | 126.94 | 128.41 | 121.46 | 121.63 | 110.51 | 118.22 |
| LYPLA2     | 122.87 | 125.55 | 118.38 | 112.59 | 126.49 | 121.71 | 103.42 | 111.84 |
| LSM4       | 109.39 | 111.24 | 105.64 | 96.11  | 115.77 | 121.97 | 95.19  | 93.51  |
| DBN1       | 130.07 | 132.83 | 125.36 | 117.98 | 119.09 | 122.1  | 94.25  | 112.32 |
| VCP        | 122.41 | 124.73 | 117.08 | 115.57 | 124.59 | 122.22 | 115.5  | 119.31 |
| ENTPD6     | 113.88 | 109.4  | 106.14 | 105.67 | 118.62 | 122.58 | 106.95 | 108.28 |
| DDX5       | 112.55 | 106.37 | 121.35 | 133.56 | 128.69 | 122.84 | 178.05 | 153.31 |
| LAMB3      | 131.54 | 130.84 | 127.63 | 124.58 | 117.97 | 123.32 | 103.67 | 108.04 |
| WDR1       | 122.26 | 125.29 | 119.48 | 116.47 | 120.73 | 123.51 | 103.2  | 109.13 |
| SLC9A3R1   | 122    | 132.58 | 119.69 | 115.33 | 115.93 | 123.95 | 89.56  | 104.87 |
| GAMT       | 134.24 | 133.68 | 124.63 | 112.7  | 118.58 | 124.02 | 82.37  | 95.41  |
| BLCAP      | 125.43 | 130.65 | 123.45 | 122.1  | 126.67 | 124.11 | 120.71 | 125.17 |
| DAP        | 123.61 | 128.43 | 120.75 | 115.48 | 119.97 | 124.16 | 109.56 | 115.71 |
| SREBF2     | 118.77 | 124    | 118.9  | 115.11 | 120.96 | 124.59 | 107.66 | 115.77 |
| PLOD1      | 152.7  | 165.71 | 149.66 | 143.93 | 114.85 | 124.74 | 101.67 | 111.38 |
| HRAS       | 129.1  | 127.53 | 121.89 | 112.26 | 132.5  | 124.87 | 97.28  | 103.49 |
| NDUFA2     | 127.21 | 134.19 | 120.38 | 118.78 | 123.34 | 125.01 | 104.93 | 115.94 |
| MRPL12     | 131.11 | 137.59 | 126.15 | 110.51 | 121.3  | 125.02 | 92.11  | 101.33 |
| PFKP       | 157.49 | 154.12 | 146.01 | 133.4  | 121.02 | 125.07 | 104.71 | 105.72 |
| YWHAG      | 125.17 | 126.88 | 125.75 | 125.93 | 131.86 | 125.12 | 132.16 | 129.46 |
| LMAN2      | 130.69 | 132.59 | 123.11 | 117.04 | 113.73 | 125.27 | 95.37  | 100.19 |
| APMAP      | 123.45 | 123.32 | 118.71 | 118.63 | 124.94 | 126.1  | 115.37 | 120.66 |
| IMPDH1     | 121.46 | 116.69 | 114.48 | 107.96 | 122.26 | 126.2  | 100.84 | 108.51 |
| CAPN1      | 120.46 | 121.63 | 113.84 | 106.91 | 123.71 | 126.48 | 97.97  | 107.52 |
| CUTA       | 127.22 | 134.58 | 121.23 | 115.44 | 121.49 | 126.6  | 99.21  | 108.98 |
| PRDX6      | 123.42 | 126.55 | 125.32 | 116.29 | 132.87 | 126.69 | 134    | 125.22 |
| DAD1       | 132.59 | 136.1  | 138.24 | 129.94 | 131.32 | 126.84 | 123.13 | 124.98 |
| EIF3M      | 109.86 | 108.89 | 118.76 | 113.93 | 132.66 | 126.86 | 156.08 | 137.7  |
| DNAJB1     | 132.94 | 137.53 | 131.05 | 129.08 | 123.51 | 127    | 114.22 | 116.91 |
| PLCD3      | 110.06 | 112.21 | 105.48 | 101.95 | 125.58 | 127.02 | 98.46  | 111.82 |
| GIT1       | 114.11 | 112.8  | 112.69 | 107.19 | 121.16 | 127.46 | 100.55 | 109.19 |
| SLC25A39   | 119.73 | 120.64 | 113.46 | 104.79 | 121.5  | 127.47 | 96.01  | 110.41 |
| HN1        | 131.4  | 141.67 | 129.29 | 124.12 | 132.13 | 127.53 | 115.04 | 121.41 |
| S100A16    | 128.49 | 130.91 | 130.5  | 120.41 | 128.14 | 127.99 | 107.97 | 109.41 |

|          |        |        |        |        |        |        |        |        |
|----------|--------|--------|--------|--------|--------|--------|--------|--------|
| RAC1     | 135.98 | 134.94 | 133.37 | 129.36 | 131.19 | 128.04 | 130.69 | 127.14 |
| HNRNPM   | 140.4  | 127.15 | 136.3  | 134.37 | 133.23 | 128.06 | 120.03 | 119.86 |
| CTSC     | 127.36 | 120.75 | 131.67 | 135.82 | 132.33 | 128.16 | 146.8  | 137.7  |
| KPNB1    | 122.82 | 116.3  | 124.94 | 127.88 | 134.7  | 128.19 | 148.02 | 142.01 |
| GDI1     | 131.23 | 135.96 | 130.32 | 126.07 | 129.2  | 128.35 | 117.13 | 124.66 |
| RPN1     | 131.17 | 133.06 | 133.1  | 127.34 | 125.46 | 128.63 | 118.54 | 120.77 |
| MBOAT7   | 126.22 | 134.24 | 121.67 | 121.31 | 116.36 | 129.15 | 94.54  | 109.12 |
| ANXA1    | 111.84 | 113.72 | 121.31 | 130.74 | 131.6  | 129.23 | 175.97 | 154.67 |
| HSF1     | 125.4  | 129.25 | 120.06 | 116.01 | 119.63 | 129.29 | 92.41  | 108.86 |
| MXRA7    | 144.05 | 138.89 | 140.94 | 130.82 | 130.42 | 129.55 | 121.12 | 120.06 |
| HNRNPAB  | 124.51 | 123.23 | 126.91 | 122.44 | 136.04 | 130.07 | 122.06 | 121.99 |
| PLTP     | 134.33 | 137.14 | 126.1  | 123.18 | 126.29 | 130.12 | 106.98 | 117.9  |
| CDC25B   | 85.98  | 89.99  | 84.14  | 83.25  | 125.53 | 130.19 | 114.54 | 125.15 |
| NUDC     | 141.06 | 135.74 | 137.19 | 125.55 | 137.01 | 130.33 | 115.93 | 127.48 |
| COX6C    | 121.78 | 121.24 | 124.71 | 136.76 | 134.8  | 130.47 | 149.98 | 151.12 |
| RABAC1   | 137.09 | 140.13 | 134.38 | 114.6  | 127.49 | 131.6  | 92.86  | 112.16 |
| G6PC3    | 130.71 | 133.44 | 120.81 | 123.51 | 138.65 | 131.61 | 110.09 | 121.27 |
| HSPA5    | 162.95 | 160.01 | 160.4  | 165.75 | 136.46 | 132.47 | 148.01 | 141.81 |
| MORF4L1  | 137.55 | 141.34 | 147.4  | 149.78 | 150.98 | 132.66 | 161.99 | 158.51 |
| EIF3B    | 120.81 | 123.32 | 117.49 | 114.69 | 135.02 | 133.39 | 116.99 | 121.51 |
| PROCR    | 115.63 | 122.3  | 109.07 | 106.85 | 128.66 | 133.6  | 113.17 | 117.22 |
| SCAND1   | 136.17 | 135.17 | 128.35 | 111.25 | 120.12 | 134.05 | 88.66  | 97.55  |
| CCDC124  | 124.16 | 127.36 | 121.81 | 110.96 | 135.42 | 134.41 | 102.56 | 109.21 |
| SHFM1    | 144.32 | 136.54 | 142.15 | 155.74 | 136.12 | 135.43 | 158.85 | 156.05 |
| TSEN34   | 137.49 | 136.38 | 133.44 | 119.19 | 130.93 | 135.54 | 112.65 | 117.55 |
| FBLN1    | 159.08 | 160.18 | 150.5  | 142.1  | 127.56 | 135.6  | 106.41 | 116.45 |
| COL6A2   | 152.95 | 156.1  | 141.09 | 141.95 | 124.94 | 136.25 | 104.15 | 111.32 |
| COX7A2   | 129.82 | 141    | 131.84 | 119.25 | 139.77 | 136.45 | 124.73 | 128.02 |
| OST4     | 140.11 | 141.48 | 127.59 | 136.32 | 135.22 | 136.68 | 116.26 | 135.48 |
| YWHAB    | 139.61 | 132.43 | 140.67 | 134.66 | 139.98 | 137.57 | 144.03 | 145.8  |
| GIPC1    | 133.58 | 136.58 | 125.25 | 116.96 | 132.05 | 137.7  | 94.14  | 119.84 |
| SEC61A1  | 131.53 | 135.46 | 128.18 | 128.13 | 140.47 | 137.8  | 131.7  | 133.55 |
| GAA      | 153.16 | 157.66 | 142.56 | 140.51 | 128.51 | 138.03 | 109.31 | 119.93 |
| PDIA3    | 154.2  | 161.03 | 156.83 | 158    | 144.21 | 138.35 | 151.56 | 148.55 |
| TCP1     | 121.22 | 116.06 | 127.01 | 126.18 | 145.59 | 138.35 | 158.29 | 148.7  |
| ARPC3    | 131.84 | 128.98 | 134.86 | 138.31 | 142.11 | 138.72 | 162.16 | 150.23 |
| QARS     | 132.54 | 127.72 | 127.49 | 121.53 | 146.16 | 139.28 | 127.89 | 132.08 |
| PIGT     | 136.02 | 140.34 | 134.03 | 130.31 | 137.73 | 139.41 | 113.77 | 125.82 |
| GABARAP  | 138.89 | 150.05 | 134.99 | 128.28 | 149.07 | 139.46 | 131.7  | 135.24 |
| TRIM28   | 171.23 | 167.61 | 161.07 | 147.39 | 128.41 | 139.52 | 102.98 | 111.4  |
| MRPL4    | 132.51 | 134.08 | 122.62 | 114.86 | 140.88 | 139.77 | 101.36 | 115.19 |
| PFDN5    | 147.18 | 164.82 | 146.97 | 134.86 | 146.65 | 139.8  | 136.79 | 137.34 |
| HM13     | 135.97 | 146.75 | 132.79 | 128.5  | 138.65 | 139.87 | 120.81 | 134.84 |
| MYL12A   | 149.37 | 148.91 | 155.42 | 152.75 | 150.88 | 139.93 | 169.61 | 160.85 |
| H2AFZ    | 144.04 | 144.94 | 143.37 | 130.67 | 148.95 | 140    | 139.25 | 140.31 |
| LRP10    | 138.12 | 141.46 | 134.63 | 129.01 | 132.85 | 140.93 | 109.74 | 125.24 |
| ECH1     | 152.22 | 159.09 | 145.68 | 133.58 | 135.94 | 140.96 | 108.47 | 114.92 |
| PHGDH    | 179.68 | 181.66 | 164.86 | 150.56 | 146.36 | 141.1  | 118.33 | 125.3  |
| COPS6    | 134.88 | 140.34 | 131.58 | 123.58 | 138.74 | 141.12 | 119.7  | 122.2  |
| GTF2I    | 134.46 | 138.07 | 138.23 | 145.78 | 141.48 | 141.14 | 173.64 | 162.68 |
| EPS8L2   | 128.96 | 130.31 | 123.45 | 117.07 | 138.51 | 142.3  | 121.82 | 128.27 |
| COX7B    | 137.01 | 133.04 | 135.57 | 140.26 | 140.37 | 142.5  | 174.49 | 152.52 |
| PTMS     | 168.51 | 178.7  | 167.02 | 166.58 | 133.01 | 143.09 | 93.13  | 130.41 |
| PLXNA1   | 146.36 | 139.74 | 142.03 | 144.8  | 142.77 | 143.17 | 127.36 | 130.03 |
| CCT4     | 139.94 | 140.23 | 139.68 | 138.69 | 149.12 | 143.49 | 149.22 | 149.2  |
| RAB13    | 134.03 | 137.35 | 137.39 | 141.17 | 144.68 | 143.82 | 141.1  | 143.38 |
| PTGES3   | 143.98 | 141.14 | 142.07 | 142.48 | 151.59 | 143.84 | 167.71 | 158.62 |
| TALDO1   | 140.85 | 142.44 | 134.34 | 128.06 | 141.22 | 144.53 | 118.5  | 127.67 |
| RANBP1   | 143.68 | 143.17 | 145.31 | 139.09 | 151.28 | 144.59 | 142.16 | 136.24 |
| MYH9     | 159.53 | 158.08 | 153.64 | 148.57 | 146.82 | 144.82 | 125.5  | 130.52 |
| PSMD4    | 145.83 | 146.26 | 140.11 | 137.79 | 148.21 | 144.99 | 131.91 | 138.64 |
| PDIA6    | 162.67 | 165.67 | 164.99 | 170.71 | 153.35 | 145.52 | 167.61 | 163.05 |
| FAM129B  | 141.38 | 146.18 | 134.09 | 130.1  | 141.66 | 145.58 | 109.91 | 123.23 |
| TPM3     | 159.03 | 160.89 | 158.88 | 156.08 | 149.73 | 145.63 | 144.35 | 141.1  |
| SHISA5   | 184.59 | 194.78 | 182.83 | 175.3  | 142.47 | 145.7  | 123.82 | 128.05 |
| PIK3R2   | 139.94 | 141.92 | 131.2  | 126.54 | 134.11 | 146.08 | 105.75 | 121.16 |
| FAM96B   | 138.4  | 146.56 | 135.6  | 126.31 | 140.72 | 146.09 | 114.9  | 124.43 |
| ARL2     | 145.25 | 150.41 | 134.18 | 125.03 | 147.07 | 146.22 | 112.52 | 122.5  |
| ATPIF1   | 138.53 | 141.69 | 133.22 | 136.1  | 153.77 | 146.29 | 132.05 | 141.21 |
| CALM2    | 153.08 | 159.19 | 149.94 | 154.17 | 158.17 | 146.61 | 186.59 | 163.31 |
| DRAP1    | 147.17 | 148.26 | 133.04 | 128.34 | 152.96 | 146.72 | 110.95 | 125.38 |
| MAP2K2   | 136.11 | 137.02 | 131.3  | 128.47 | 139.47 | 146.78 | 110.35 | 122.16 |
| ADAM15   | 139.56 | 139.97 | 135.26 | 122.88 | 139.72 | 147.2  | 114.66 | 125.27 |
| CALML3   | 187.56 | 187.53 | 169.45 | 152.29 | 136.58 | 147.3  | 101.46 | 118.76 |
| C19orf33 | 163.14 | 177.17 | 157.92 | 147.85 | 143.69 | 148.33 | 110.39 | 126.01 |
| EIF4G1   | 146.9  | 152.6  | 146.89 | 144.07 | 147.23 | 148.44 | 134.28 | 140.49 |
| CLTA     | 146.29 | 150.55 | 148.72 | 140.38 | 148.62 | 148.7  | 135.69 | 146.83 |
| NDUFB2   | 142.49 | 144.08 | 139.2  | 128.17 | 152.89 | 148.71 | 126.51 | 128.24 |
| TM4SF1   | 150.18 | 147.71 | 153.84 | 163.83 | 144.26 | 149.91 | 171.12 | 153.56 |
| SOD1     | 156.51 | 157.91 | 158.48 | 158.27 | 154.26 | 150.55 | 152.92 | 159.4  |
| HNRNPUL1 | 155.9  | 158.57 | 150.79 | 149.1  | 151.39 | 150.69 | 130.66 | 138.51 |
| PLEC     | 152.44 | 145.94 | 143.47 | 137.51 | 134.98 | 150.72 | 112.46 | 121.82 |
| PTBP1    | 166.61 | 160.66 | 158.77 | 150.57 | 153.05 | 150.84 | 126.35 | 133.18 |
| CCT5     | 144.31 | 143.18 | 148.83 | 146.44 | 163.87 | 151.73 | 167.4  | 160.65 |
| PPP1CA   | 164.22 | 168.64 | 155.27 | 142.04 | 151.85 | 152.43 | 117.5  | 126.71 |
| RAD23A   | 149.91 | 154.71 | 145.77 | 136.89 | 155.48 | 152.54 | 128.99 | 139.55 |
| MCM7     | 157.36 | 152.56 | 147.61 | 141.87 | 150.78 | 153.85 | 133.42 | 129.96 |

|           |        |        |        |        |        |        |        |        |
|-----------|--------|--------|--------|--------|--------|--------|--------|--------|
| XRCC6     | 160.74 | 163.75 | 160.07 | 150.83 | 159.25 | 153.85 | 159.23 | 147.24 |
| BAG6      | 156.76 | 157.93 | 149.62 | 139.59 | 151.79 | 154.11 | 124.99 | 134.97 |
| MLF2      | 152.1  | 159.66 | 148.2  | 144.29 | 160.76 | 154.43 | 130.06 | 146.41 |
| PPIB      | 173.52 | 174.22 | 159.21 | 151.11 | 154.19 | 154.58 | 130.29 | 142.74 |
| PABPC4    | 146.59 | 144.66 | 144.84 | 142.81 | 155.37 | 154.65 | 136.41 | 147.1  |
| MGAT4B    | 143.42 | 148.94 | 141.79 | 133.92 | 146.61 | 154.76 | 125.86 | 131.26 |
| STMN1     | 162.59 | 163    | 164.36 | 158.57 | 168.09 | 155.32 | 178.64 | 164.65 |
| ATP5O     | 146.3  | 152.71 | 148.7  | 144.53 | 162.53 | 155.46 | 164.61 | 164.05 |
| FAAP20    | 152.6  | 148.48 | 144.62 | 132.52 | 135.33 | 155.5  | 101.11 | 112.11 |
| SRM       | 146.73 | 141.54 | 139.68 | 127.24 | 148.62 | 155.63 | 117.39 | 125.04 |
| APRT      | 148.83 | 142.06 | 143.41 | 122.75 | 156.49 | 155.72 | 119.06 | 131.24 |
| SUMF2     | 164.73 | 177.54 | 167.22 | 158.49 | 145.86 | 156.1  | 133.56 | 142.36 |
| ATF4      | 155.8  | 154.99 | 162.18 | 158.03 | 165.82 | 156.64 | 159.89 | 155.54 |
| TMBIM6    | 165.43 | 169.89 | 165.34 | 164.78 | 159.52 | 157.23 | 158.57 | 159.45 |
| AP1S1     | 138.73 | 144.35 | 137.3  | 130.84 | 160.06 | 157.35 | 139.36 | 145.18 |
| ATP5G1    | 140.08 | 147.89 | 140.25 | 131.45 | 160.43 | 157.44 | 137.15 | 135.6  |
| VDAC2     | 146.05 | 154.27 | 147.91 | 142.51 | 159.53 | 157.75 | 158.26 | 149.88 |
| HNRNPL    | 154.45 | 165.09 | 153.74 | 145.78 | 160.69 | 157.79 | 147.1  | 141.41 |
| HNRNPK    | 172.47 | 170.67 | 172.42 | 174.17 | 170.54 | 158.04 | 184.55 | 171.81 |
| CCT6A     | 162.7  | 145.96 | 165.37 | 175.58 | 157.71 | 158.19 | 198.18 | 180.42 |
| TMA7      | 153.52 | 163.55 | 155.93 | 158.77 | 171.96 | 158.58 | 159.06 | 164.01 |
| HNRNPC    | 175.35 | 182.94 | 174.86 | 171.35 | 172.27 | 158.58 | 169.23 | 175    |
| ISG15     | 411.86 | 404.1  | 379.05 | 350.12 | 151.59 | 158.9  | 125.12 | 112.77 |
| ITGB1     | 150.15 | 150.27 | 171.52 | 188.99 | 169.56 | 158.99 | 233.6  | 211.96 |
| BEX3      | 164.42 | 169.03 | 164.7  | 171.69 | 156.63 | 159.29 | 154.44 | 160.39 |
| SLC14A1   | 208.86 | 206    | 209.24 | 216.29 | 164.55 | 159.75 | 175.43 | 169.94 |
| C6orf48   | 148.59 | 150.95 | 153.78 | 151.25 | 165.36 | 160.16 | 152.53 | 158.37 |
| AP2B1     | 155.42 | 162.61 | 160.62 | 153.94 | 166.12 | 160.35 | 175.63 | 166.5  |
| YWHAQ     | 166.6  | 162.49 | 172.78 | 167.93 | 159.38 | 160.62 | 173.14 | 163.86 |
| RNH1      | 165.38 | 163.67 | 155.03 | 143.37 | 157.78 | 161.28 | 117.27 | 128.84 |
| MYL12B    | 159.63 | 161.29 | 162.81 | 164.81 | 170.32 | 161.3  | 199.6  | 182.25 |
| EIF3C     | 156.59 | 151.45 | 143.67 | 141.97 | 165.82 | 162    | 150.47 | 157.5  |
| TMED9     | 166.71 | 177.61 | 160.67 | 158.61 | 158.57 | 162.16 | 131.73 | 144.16 |
| ISYNA1    | 203.35 | 199.06 | 188.84 | 166.85 | 150.8  | 162.51 | 123.8  | 136.7  |
| C1orf43   | 147.46 | 148.05 | 149.73 | 149.75 | 170.16 | 164.14 | 160.97 | 156.42 |
| STIP1     | 180.76 | 189.94 | 173.83 | 170.1  | 170.67 | 164.57 | 152.07 | 152.84 |
| CTNNB1    | 167.46 | 154.78 | 172.58 | 180.99 | 171.3  | 164.83 | 199.41 | 184.31 |
| UBE2S     | 155.11 | 151.3  | 146.47 | 129.44 | 153.23 | 164.9  | 112.21 | 123.03 |
| COPE      | 173.06 | 171.03 | 158.19 | 149.4  | 159.61 | 165.21 | 124.43 | 132.71 |
| CPNE1     | 178.13 | 183.63 | 174.22 | 164.44 | 165.41 | 165.25 | 148.21 | 157.26 |
| SEMA3F    | 209.62 | 221.97 | 196.66 | 194.2  | 148.17 | 165.37 | 124.75 | 144.5  |
| HIGD2A    | 167.04 | 159.26 | 155.91 | 145.79 | 159.78 | 165.92 | 136.71 | 137.81 |
| TAF10     | 150.67 | 151.6  | 148.17 | 134.52 | 159.74 | 166.06 | 129.03 | 133.87 |
| TSPO      | 156.16 | 147.81 | 136.46 | 130.43 | 152.54 | 166.41 | 112.97 | 120.85 |
| PKN1      | 167.39 | 165.71 | 160.42 | 143.06 | 164.04 | 166.49 | 120.54 | 135.64 |
| AURKAIP1  | 152.08 | 157.66 | 149.16 | 139.29 | 160.4  | 166.74 | 123.99 | 136.6  |
| SERINC2   | 137.97 | 142.95 | 134.44 | 133.18 | 171.3  | 166.79 | 132.17 | 145.62 |
| TRMT112   | 178.31 | 177.39 | 161.53 | 159.02 | 171.78 | 167.1  | 132.86 | 144.1  |
| IER3      | 184.17 | 174.54 | 171.04 | 170.3  | 173.74 | 167.38 | 144.03 | 146.82 |
| TIMP2     | 166.57 | 181    | 171.83 | 169.92 | 162.25 | 167.55 | 153.42 | 159.9  |
| ARPC1A    | 171.66 | 177.98 | 164.68 | 161.45 | 165.09 | 167.8  | 156.03 | 157.43 |
| PSMB3     | 167.53 | 169.28 | 158.7  | 145.4  | 163.16 | 167.83 | 129.83 | 136.99 |
| LAPTM5    | 141.92 | 146.64 | 141.97 | 141.78 | 179.66 | 168.46 | 167.49 | 166.17 |
| SSR4      | 182.31 | 186.36 | 168.26 | 164.76 | 177.4  | 168.55 | 141.04 | 150.97 |
| TMEM205   | 172.72 | 171.95 | 165.72 | 148.44 | 160.29 | 168.63 | 133.29 | 143.41 |
| CLU       | 307.06 | 336.65 | 285.3  | 295.42 | 148.96 | 168.79 | 123.29 | 162.1  |
| EIF3H     | 170.76 | 162.6  | 176.21 | 183.01 | 185.46 | 170.43 | 207.01 | 194.18 |
| HMGA2     | 190.11 | 164.7  | 194.07 | 208.08 | 170.68 | 170.77 | 179.31 | 181.72 |
| LFNG      | 184.88 | 187.64 | 181.94 | 171.18 | 154.43 | 170.83 | 136.65 | 144.96 |
| CAP1      | 168.73 | 166.76 | 171.35 | 169.75 | 178.91 | 170.88 | 183.17 | 178.24 |
| EIF4B     | 148.12 | 149.1  | 152.39 | 154    | 179.69 | 171.53 | 182.42 | 179.79 |
| LAMTOR4   | 179.1  | 177.25 | 166.3  | 145.16 | 170.78 | 172.02 | 133.72 | 139.81 |
| SLC2A4RG  | 194.09 | 187.13 | 178.18 | 167.77 | 162.34 | 173.07 | 121.14 | 133.52 |
| HSPD1     | 161.08 | 147.83 | 172.69 | 180.74 | 188.53 | 173.07 | 224.06 | 212.49 |
| CANX      | 177.76 | 171.29 | 185.74 | 195.87 | 192.6  | 173.18 | 228.17 | 209.62 |
| HNRNPA2B1 | 182.66 | 160.79 | 194.45 | 208.54 | 198.2  | 173.94 | 245.2  | 237.86 |
| RTN4      | 169.28 | 162.89 | 169.69 | 178.7  | 172.13 | 174.12 | 168.51 | 170.41 |
| SSR2      | 188.25 | 194.35 | 183.98 | 176.21 | 183.16 | 174.46 | 179.99 | 174.21 |
| HDLBP     | 182    | 184.76 | 180.07 | 176.59 | 172.64 | 174.49 | 163.85 | 169.43 |
| ACLY      | 133.04 | 145.54 | 131.88 | 136.41 | 164.19 | 174.77 | 150.75 | 168.74 |
| HDGF      | 172.98 | 174.92 | 172    | 168.78 | 186.37 | 175.12 | 161.29 | 170.36 |
| G6PD      | 159.85 | 163.86 | 148.76 | 142.64 | 160.55 | 175.45 | 126.43 | 147.04 |
| MSN       | 181.81 | 191.17 | 180.5  | 176.83 | 181.98 | 175.7  | 168.74 | 177.38 |
| NDUFB9    | 170.93 | 175.51 | 166.13 | 153.75 | 181.1  | 175.82 | 161.64 | 163.35 |
| CDC37     | 163.34 | 165.46 | 163.22 | 161.41 | 173.18 | 176.29 | 156.24 | 160.26 |
| ARPC1B    | 169.97 | 171.58 | 161.1  | 152.61 | 164.95 | 176.42 | 125.52 | 142.69 |
| PCBP2     | 179    | 187.28 | 176.71 | 175.5  | 180.32 | 176.42 | 161.15 | 172.77 |
| APEX1     | 171.85 | 173.86 | 165.72 | 162.55 | 193.54 | 177.46 | 164.85 | 170.65 |
| AKR1B1    | 176.66 | 182.72 | 165.88 | 157.84 | 179.37 | 177.5  | 157.45 | 162.33 |
| VDAC1     | 177.73 | 178.39 | 177.52 | 176.61 | 188.49 | 178.85 | 192.88 | 186.36 |
| PLXNB2    | 187.12 | 187.47 | 178.85 | 175.5  | 169.95 | 180.68 | 145.41 | 154.28 |
| EIF3I     | 172.23 | 175.19 | 173.78 | 161.1  | 191.62 | 181.42 | 170.53 | 175.08 |
| PNPLA2    | 182.13 | 182.29 | 172.81 | 163.02 | 172.13 | 181.89 | 132.46 | 150.62 |
| ATP5G2    | 212.96 | 210.56 | 205.59 | 193.97 | 201.53 | 181.9  | 161.82 | 182.31 |
| SH3BGL3   | 176.64 | 184.75 | 161.33 | 160.2  | 181.11 | 181.94 | 148.96 | 169.92 |
| UQCRC1    | 181.62 | 189.29 | 176.12 | 161.04 | 182.03 | 182.15 | 154.92 | 161.3  |



|          |        |        |        |        |        |        |        |        |
|----------|--------|--------|--------|--------|--------|--------|--------|--------|
| IMPDH2   | 170.28 | 170.27 | 163.27 | 156.42 | 190.54 | 182.49 | 166.41 | 168.22 |
| WBP2     | 174.59 | 182.19 | 164.86 | 169.2  | 180.76 | 183.04 | 140.08 | 168.16 |
| HLA-A    | 190.16 | 205.91 | 192.18 | 180.89 | 185.45 | 183.07 | 150.98 | 160.31 |
| PRMT1    | 187.03 | 184.83 | 174.27 | 165.27 | 178.73 | 183.08 | 145.38 | 154.62 |
| EPHA2    | 221.72 | 221.57 | 203.99 | 203.39 | 174.28 | 183.31 | 146.59 | 161.51 |
| CNN2     | 224.33 | 234.37 | 215.78 | 200.19 | 181.67 | 183.62 | 142.67 | 164.6  |
| YWHAE    | 196.85 | 201.3  | 200.63 | 198.06 | 193.64 | 183.65 | 186.58 | 202.92 |
| ILF3     | 188.92 | 190.55 | 185.67 | 184.02 | 188.74 | 184.1  | 178.52 | 177.66 |
| TRIP6    | 198.68 | 189.6  | 185.32 | 175.23 | 186.37 | 184.75 | 143.93 | 157.34 |
| GDF15    | 149.14 | 148.7  | 144.08 | 126.68 | 181.59 | 184.82 | 140.22 | 147.32 |
| RAB5C    | 179.6  | 186.47 | 175.24 | 167.07 | 187.72 | 184.85 | 146.15 | 160.02 |
| ACOT7    | 180.5  | 180.12 | 164.79 | 156.26 | 182.88 | 185.52 | 140.23 | 152.44 |
| S100A10  | 186.92 | 198.41 | 189.1  | 182.34 | 200.37 | 185.6  | 195.59 | 187.71 |
| SDF4     | 194.63 | 200.43 | 185.68 | 182.64 | 185.59 | 186.82 | 141.4  | 164.35 |
| NDUFB4   | 185.29 | 201.84 | 180.18 | 181.26 | 178.98 | 187.68 | 174.82 | 179.02 |
| COX5A    | 167.21 | 173.33 | 168.9  | 150.26 | 185.89 | 188.72 | 168.07 | 173.55 |
| DYNLL1   | 209.71 | 207.94 | 203.9  | 205.69 | 193.32 | 189.56 | 195.64 | 185.58 |
| NME1     | 198.21 | 203.39 | 188.01 | 184.58 | 217.88 | 189.8  | 179.42 | 187.08 |
| UBA1     | 193.52 | 198.64 | 186.73 | 176.32 | 181.64 | 189.91 | 158.58 | 169.97 |
| SUMO2    | 199.87 | 205.25 | 200.31 | 209.99 | 204.04 | 189.92 | 210.95 | 211.72 |
| TBCA     | 185.67 | 197.76 | 190.76 | 190.42 | 202.99 | 190.12 | 197.81 | 205.16 |
| ATP6V1F  | 190.22 | 201.42 | 174.72 | 171.94 | 193.25 | 190.42 | 150.13 | 171.57 |
| RALY     | 208.39 | 201.26 | 197.21 | 184.05 | 183.52 | 190.48 | 143.61 | 152.88 |
| H3F3B    | 214.93 | 205.23 | 212.37 | 211.91 | 192.09 | 190.59 | 188.77 | 188.29 |
| SQSTM1   | 185.94 | 186.68 | 182.13 | 174.92 | 190.77 | 193.54 | 159.23 | 173.34 |
| CX3CL1   | 215.08 | 226.5  | 209.74 | 209.45 | 191.83 | 194.22 | 165.82 | 186.51 |
| NPC2     | 171.8  | 188.67 | 173.39 | 180.23 | 194.71 | 194.45 | 181.51 | 185.52 |
| GNB1     | 205.12 | 208.01 | 210.8  | 204.06 | 199.96 | 195.41 | 195.08 | 193.32 |
| GNAI2    | 217.26 | 223.48 | 202.85 | 199.19 | 192.04 | 195.62 | 157.94 | 173.75 |
| EPHB4    | 215.22 | 217.32 | 204.05 | 200.5  | 184.18 | 195.72 | 150.43 | 172.16 |
| NDUFS5   | 172.55 | 199.61 | 179.03 | 185.65 | 202.89 | 195.72 | 177.37 | 194.78 |
| NDUFA11  | 199.45 | 214.19 | 190.25 | 177.18 | 185.66 | 195.76 | 139.59 | 154.91 |
| NAXE     | 190.52 | 196.5  | 181.11 | 171.42 | 197.36 | 195.9  | 160.98 | 171.73 |
| NCL      | 190.96 | 175.1  | 199.15 | 209.55 | 221.66 | 196.67 | 245.91 | 235.02 |
| TXN      | 191.49 | 197.71 | 192.29 | 195.76 | 199.11 | 196.87 | 235.42 | 209.65 |
| IGFBP7   | 222.06 | 213.87 | 207.92 | 210.31 | 201.78 | 198.11 | 161.45 | 162.31 |
| CLSTN1   | 214.87 | 228.4  | 209.42 | 205.95 | 182.55 | 198.23 | 165.52 | 176.59 |
| DSTN     | 177.46 | 175.1  | 188.49 | 186.17 | 219.57 | 198.3  | 250.23 | 223.12 |
| EIF3E    | 183.33 | 187.48 | 184.95 | 189.72 | 213.41 | 198.49 | 263.6  | 227.09 |
| SLC25A1  | 179.22 | 193.48 | 176.4  | 160.48 | 182.25 | 199.13 | 141.85 | 162.82 |
| GRINA    | 222.15 | 226.11 | 207.02 | 199.98 | 200.27 | 199.28 | 159.02 | 183.78 |
| SND1     | 199.06 | 203.87 | 195.62 | 178.59 | 198.92 | 199.65 | 173.81 | 181.46 |
| COL6A1   | 172.18 | 179.43 | 171.84 | 169    | 178.45 | 199.77 | 157.37 | 173.65 |
| GLTSCR2  | 208.84 | 207.46 | 199.45 | 182.84 | 199.58 | 199.85 | 147.63 | 166.69 |
| ARF5     | 214.45 | 225.09 | 213.8  | 190.36 | 197.71 | 200.66 | 153.5  | 168.71 |
| H1FX     | 243.24 | 243.9  | 226.48 | 201.88 | 182.48 | 200.9  | 130.83 | 150.88 |
| LAMB1    | 186.91 | 182.52 | 202.52 | 220.8  | 201.5  | 201.76 | 248.14 | 236.28 |
| APLP2    | 202.65 | 206.91 | 201.95 | 210.22 | 205.74 | 202.09 | 212.11 | 206.88 |
| NONO     | 212.48 | 215.49 | 211.14 | 204.42 | 212.75 | 202.77 | 205.65 | 202.3  |
| CYC1     | 180.8  | 181.46 | 172.46 | 153.66 | 188.53 | 203.46 | 138.95 | 156.99 |
| EDF1     | 225.86 | 237.47 | 230.36 | 207.61 | 204.76 | 203.96 | 171.3  | 175.73 |
| POLR2L   | 221.39 | 208.22 | 211.04 | 184.48 | 196.92 | 204.04 | 164.86 | 167    |
| CSDE1    | 183.73 | 171.55 | 197.33 | 215.3  | 215.89 | 204.36 | 268.26 | 243.8  |
| JAG1     | 192.19 | 185.14 | 199.64 | 204.35 | 215.74 | 204.82 | 229.68 | 205.12 |
| IFI6     | 615.08 | 607.98 | 596.75 | 582.59 | 212.58 | 204.94 | 183.98 | 148.99 |
| HSP90B1  | 220.85 | 216.07 | 248.69 | 285.95 | 217.73 | 205.03 | 323.43 | 291.01 |
| DDIT4    | 259.57 | 267.1  | 247.48 | 232.5  | 200.8  | 205.05 | 179.7  | 194.23 |
| ATP5D    | 188.73 | 190.78 | 173.74 | 157.31 | 199.19 | 206.03 | 143.96 | 158.01 |
| EIF3K    | 183.18 | 193.88 | 185.33 | 174.35 | 211.21 | 206.11 | 175.9  | 186.72 |
| C19orf43 | 208.94 | 211.14 | 201.94 | 194.03 | 215.56 | 206.4  | 157.27 | 181.46 |
| DUSP4    | 217.85 | 221.02 | 214.67 | 217    | 192.72 | 206.56 | 184.38 | 200.08 |
| RPN2     | 214.16 | 205.2  | 215.95 | 224.29 | 208.73 | 207.69 | 223.83 | 219.61 |
| NHP2     | 188.22 | 185.22 | 177.35 | 176.95 | 217.97 | 208.63 | 191.52 | 182.5  |
| MYL6     | 248.82 | 255.68 | 235.88 | 224.5  | 219.5  | 211.32 | 188.76 | 190.72 |
| MDH2     | 197.75 | 201.62 | 192.75 | 180.79 | 217.26 | 213.27 | 180.73 | 198.35 |
| RHOA     | 226.11 | 237.01 | 225.25 | 218.27 | 233.2  | 213.68 | 219.46 | 213.66 |
| FBL      | 248.65 | 237.87 | 231.29 | 215.98 | 223.16 | 213.98 | 203.26 | 201.59 |
| EIF3L    | 199.55 | 203.41 | 198.86 | 195.66 | 226.99 | 215.22 | 224.77 | 218.06 |
| HSPG2    | 199.52 | 204.64 | 192.05 | 192.45 | 196.78 | 215.96 | 176.72 | 194.68 |
| ROMO1    | 235.87 | 222.22 | 213.37 | 200.73 | 223.15 | 216.73 | 164.98 | 184.46 |
| ITM2B    | 234.76 | 235.16 | 242.55 | 252.46 | 222.12 | 217.18 | 254.63 | 236.59 |
| LDLR     | 189.62 | 210.73 | 188.68 | 200.54 | 204.88 | 217.36 | 187.37 | 210.1  |
| PARK7    | 211.1  | 216.19 | 215.88 | 208.18 | 221.61 | 217.42 | 209.19 | 209.34 |
| CMTM7    | 211.49 | 221.06 | 210.79 | 211.74 | 226.06 | 217.61 | 202.46 | 214.84 |
| COX5B    | 219.39 | 228.94 | 210.46 | 198.55 | 221.88 | 217.95 | 196.24 | 194.15 |
| DYNLRB1  | 230.5  | 243.05 | 223.13 | 222.64 | 232.01 | 218.25 | 192.88 | 218.83 |
| BANF1    | 227.78 | 251.01 | 224.38 | 231.87 | 225.74 | 219.55 | 190.15 | 198.61 |
| ACTN1    | 214.72 | 221.37 | 209.76 | 204.43 | 217.52 | 219.86 | 186.44 | 192.53 |
| NAP1L1   | 203.89 | 193.07 | 215.21 | 223.19 | 234.31 | 220.17 | 281.94 | 261.52 |
| DKK3     | 230.8  | 234.49 | 224.34 | 226.6  | 220.16 | 223.18 | 203.64 | 209.33 |
| H2AFY    | 226.89 | 230.46 | 230.37 | 223.28 | 225.73 | 223.56 | 220.73 | 219.92 |
| TXNIP    | 295.35 | 305.19 | 299.87 | 290.46 | 229.21 | 224.14 | 250.93 | 242.24 |
| PLP2     | 251.32 | 257.37 | 247.92 | 240.9  | 242.48 | 225.13 | 204.66 | 215.33 |
| PDI4A    | 251.91 | 262.37 | 241.93 | 242.36 | 221.82 | 225.29 | 211.84 | 217.44 |
| COX6B1   | 222.52 | 210.44 | 208.97 | 204.09 | 234.43 | 225.38 | 198.83 | 188.82 |
| HMG2     | 231    | 223.63 | 233.1  | 216.15 | 232.73 | 225.88 | 225.79 | 210.01 |
| NDUFB7   | 227.06 | 216.81 | 217.05 | 193.45 | 226.47 | 226.96 | 173.89 | 175.71 |
| TECR     | 223.52 | 239.89 | 225.04 | 203.63 | 220.59 | 227.14 | 178.16 | 203.16 |
| CCT7     | 240.53 | 248.06 | 236.75 | 222.48 | 227.96 | 227.39 | 211.48 | 216.78 |

|          |        |        |        |        |        |        |        |        |
|----------|--------|--------|--------|--------|--------|--------|--------|--------|
| MZT2A    | 214.88 | 208.61 | 206.03 | 186.49 | 214.27 | 227.44 | 157.6  | 170.6  |
| PHB2     | 219.5  | 227.13 | 215.86 | 200.68 | 230.22 | 227.79 | 197.15 | 199.21 |
| RPL27A   | 244.92 | 249.05 | 237.75 | 234.27 | 238.52 | 229.92 | 215.01 | 216.47 |
| GANAB    | 239.79 | 247    | 237.65 | 237.05 | 230.16 | 230.44 | 222.67 | 226.16 |
| GPC1     | 229.97 | 230.14 | 217.64 | 205    | 223.03 | 230.72 | 174.28 | 191.27 |
| BR13     | 221.1  | 220.86 | 210.17 | 198.08 | 215.04 | 231.49 | 178.9  | 196.49 |
| GUK1     | 255.48 | 255.27 | 234.85 | 218.56 | 223.5  | 231.54 | 167.17 | 183.31 |
| TTYH3    | 242.95 | 243.31 | 229.09 | 216.83 | 212.2  | 232.06 | 168.65 | 195.06 |
| TP63     | 246.19 | 236.75 | 262.25 | 271.85 | 242.22 | 232.18 | 249.79 | 261.14 |
| PYCR2    | 249.76 | 261.15 | 252.15 | 238.29 | 239.34 | 232.81 | 208.03 | 225.05 |
| YWHAZ    | 229.2  | 226.36 | 238.45 | 245.57 | 240.78 | 236.56 | 285.73 | 268.55 |
| HMG1A1   | 230.23 | 227.47 | 224.6  | 212.64 | 248.9  | 237.01 | 194.52 | 212.63 |
| JUP      | 278.26 | 281.88 | 260.64 | 242.18 | 221.4  | 237.08 | 179.47 | 200.2  |
| KRT75    | 183.23 | 170.22 | 185.86 | 166.83 | 253.18 | 237.22 | 205.49 | 193.25 |
| TUFM     | 217.39 | 218.22 | 203.07 | 190.06 | 240.34 | 237.35 | 187.34 | 204.64 |
| CLIC1    | 263.18 | 272.97 | 259.97 | 241.41 | 236.38 | 237.42 | 207.13 | 206.06 |
| CD44     | 206.17 | 205.46 | 206.7  | 207.55 | 235.06 | 237.8  | 239.4  | 240.56 |
| EIF6     | 236.34 | 243.58 | 229.37 | 215.96 | 239.74 | 239.11 | 193.7  | 206.46 |
| RPL22    | 239.85 | 226.29 | 237.74 | 247.89 | 260.37 | 243.65 | 280.78 | 275.59 |
| COLGALT1 | 225.52 | 239.03 | 220.98 | 218.18 | 232.74 | 243.82 | 204.42 | 220.91 |
| TUBB4B   | 248.17 | 247.73 | 229.35 | 207.64 | 233.61 | 243.94 | 189.62 | 201.45 |
| ARF1     | 252.1  | 253.75 | 245.3  | 224.43 | 239.47 | 244.09 | 212.62 | 223.46 |
| TGFB1    | 239.66 | 252.53 | 230.49 | 225.06 | 228.51 | 245.08 | 179.43 | 208.33 |
| ATP5J2   | 259.44 | 265.36 | 233.56 | 237.87 | 262.03 | 245.6  | 218.23 | 233.17 |
| CTSB     | 250.38 | 259.51 | 250.77 | 238.64 | 255.17 | 247.44 | 234.49 | 231.99 |
| LY6E     | 361.02 | 360.37 | 337.61 | 305.64 | 241.8  | 247.9  | 183.93 | 192.51 |
| SYNGR2   | 223.72 | 235.55 | 225.26 | 213.18 | 253.17 | 248.19 | 199.27 | 229.76 |
| CAPS     | 287.72 | 289.97 | 273.96 | 247.66 | 228.54 | 249.32 | 172.99 | 201.41 |
| ERGIC3   | 274.94 | 273.49 | 260.03 | 251.6  | 244.85 | 250.31 | 211.33 | 212.43 |
| EIF4G2   | 236.63 | 221.77 | 249.3  | 251.81 | 261.34 | 250.93 | 304.9  | 285.49 |
| FDPS     | 217.97 | 251.18 | 221.22 | 221.59 | 255.78 | 251.05 | 221    | 252.74 |
| RPS26    | 246.26 | 254.34 | 238.57 | 223.55 | 246.94 | 251.54 | 220.75 | 213.98 |
| COL9A3   | 255.4  | 265.28 | 246.68 | 257.25 | 213.69 | 253.24 | 207.25 | 231.56 |
| ITGB4    | 237.9  | 237.88 | 230.63 | 223.19 | 241.26 | 254.28 | 202.91 | 221.74 |
| RPS23    | 281.83 | 282.69 | 271.61 | 265.08 | 277.74 | 254.55 | 258.66 | 254.46 |
| SAT1     | 184.64 | 199.32 | 201    | 216.97 | 256.79 | 255.89 | 298.03 | 282.5  |
| PGAM1    | 341.99 | 336.34 | 324.53 | 300.76 | 255.54 | 256.98 | 232.09 | 228.38 |
| ATP6V0C  | 235.03 | 255.39 | 224.18 | 213.45 | 253.27 | 258.36 | 178.22 | 209.65 |
| SLC25A3  | 228.16 | 240.47 | 223.28 | 218.24 | 264.62 | 258.9  | 241.2  | 250.5  |
| UQCRRH   | 249.64 | 244.18 | 264.6  | 237.68 | 275.76 | 259.99 | 277.86 | 273.91 |
| FLOT1    | 327.24 | 349.74 | 334.07 | 310.24 | 274.44 | 260.32 | 226.94 | 255.63 |
| ARPC2    | 259.35 | 263.11 | 268.39 | 269.23 | 271.14 | 261.12 | 273.2  | 263.41 |
| HINT1    | 257.95 | 264.19 | 243.29 | 241.71 | 268.33 | 264.41 | 260.66 | 256.43 |
| SREBF1   | 171.43 | 203.71 | 172.69 | 189.42 | 215.83 | 265.07 | 172.16 | 215.6  |
| B2M      | 294.06 | 296.37 | 308.67 | 321.1  | 281.18 | 268.32 | 346.1  | 296.99 |
| EEF1D    | 263.9  | 260.57 | 251.55 | 233.17 | 267.82 | 270.28 | 205.31 | 233.66 |
| ATP5A1   | 256.81 | 262.65 | 254.04 | 256.34 | 280.86 | 270.51 | 267.47 | 273.06 |
| BCAP31   | 276.96 | 294.1  | 266.17 | 259.34 | 278.34 | 271.1  | 233.76 | 252.25 |
| EIF3F    | 268.1  | 268.14 | 255.99 | 249.3  | 272.74 | 271.82 | 238.71 | 245.81 |
| TNS4     | 255.68 | 270.15 | 260.09 | 255.16 | 277.95 | 272.05 | 261.25 | 283.02 |
| CTAG2    | 256.12 | 251.66 | 237.7  | 213.93 | 266.21 | 272.55 | 183.26 | 202.28 |
| KRT5     | 319.04 | 311.33 | 303.47 | 286.42 | 268.55 | 273.46 | 217.43 | 235.87 |
| CCT3     | 265.93 | 273.59 | 262.87 | 245.63 | 286.57 | 273.69 | 259.14 | 254.43 |
| TGFB1    | 356.41 | 368.62 | 348.21 | 345.04 | 258.21 | 273.92 | 251.18 | 257.61 |
| PLD3     | 324.52 | 329.76 | 298.39 | 294.84 | 257.9  | 273.97 | 193.84 | 223.48 |
| EIF3G    | 264.85 | 263.04 | 254.08 | 238.33 | 272.91 | 274.62 | 208.97 | 228.18 |
| DDOST    | 278.98 | 292.08 | 277.57 | 268.57 | 283.03 | 275.06 | 259.65 | 268.69 |
| MZT2B    | 281.34 | 272.75 | 266.45 | 234.24 | 266.8  | 275.78 | 184.04 | 205.45 |
| HSP90AA1 | 284.27 | 249.81 | 310.69 | 327.86 | 301.24 | 276.16 | 389.62 | 342.55 |
| CD81     | 298.7  | 301.76 | 283.66 | 267.59 | 269.7  | 276.94 | 224.53 | 241.72 |
| PRDX1    | 264.78 | 259.32 | 280.91 | 260.19 | 287.41 | 277.02 | 300.87 | 291.09 |
| FKBP10   | 285.25 | 299.66 | 268.94 | 270.44 | 273.8  | 277.89 | 229.57 | 251.81 |
| FKBP1A   | 273.36 | 289.27 | 271.23 | 265.92 | 296.26 | 278.01 | 276.88 | 288.32 |
| CAPNS1   | 288.71 | 303.87 | 274.14 | 266.75 | 277.07 | 278.17 | 237.56 | 261    |
| PRDX5    | 284.75 | 306.14 | 271.5  | 265.98 | 283.45 | 282.43 | 205.15 | 253.55 |
| SDC1     | 273.47 | 292.33 | 263.83 | 257.91 | 256.98 | 282.78 | 213.61 | 242.91 |
| ATP5H    | 278.76 | 280.82 | 273.47 | 269.86 | 293.85 | 284.55 | 282.58 | 291.86 |
| LDHA     | 447.35 | 431.06 | 452.87 | 414.4  | 280.7  | 285.06 | 312.53 | 281.18 |
| PGK1     | 378.77 | 380.72 | 374.16 | 348.28 | 276.48 | 285.2  | 280.72 | 276.7  |
| DHCR24   | 256.61 | 276.51 | 251.98 | 251.35 | 267.78 | 285.26 | 243.39 | 264.72 |
| PSMB4    | 310.62 | 296.41 | 300.98 | 270.04 | 270.72 | 286.88 | 237.42 | 257.61 |
| NDUFS6   | 273.48 | 287.27 | 251.87 | 250.96 | 271.91 | 287.27 | 214.7  | 224.61 |
| RHOC     | 292.29 | 313.17 | 279.36 | 260.97 | 286.34 | 287.55 | 233.78 | 257.28 |
|          | 44448  | 323.64 | 323.44 | 309.75 | 298.91 | 285.87 | 227.99 | 251.29 |
| AP2M1    | 289.14 | 298.67 | 281.41 | 275.5  | 288.85 | 288.66 | 248.92 | 262.77 |
| SNRPB    | 302.85 | 305.56 | 291.6  | 265.04 | 293.44 | 289.46 | 225.27 | 237.6  |
| KRT18    | 319.11 | 336.79 | 311.61 | 287.11 | 284.88 | 292.12 | 246.45 | 270.06 |
| EIF4A1   | 284.04 | 290.66 | 277.93 | 276.78 | 309.76 | 292.7  | 290.09 | 293.79 |
| NDUFA13  | 300.15 | 304.01 | 278.33 | 267.27 | 308.58 | 295.68 | 241.57 | 257.69 |
| YBX3     | 302    | 288.49 | 286.9  | 280.84 | 293.37 | 296.69 | 248.44 | 262.65 |
| AES      | 325.85 | 346.92 | 318.13 | 314.74 | 295.68 | 297.41 | 240.28 | 269.33 |
| ACTN4    | 313.62 | 328.53 | 301.3  | 294.19 | 298.18 | 301.96 | 239.56 | 268.13 |
| DDT      | 273.19 | 283.5  | 278.1  | 252.88 | 311.33 | 306.23 | 251.85 | 264.69 |
| CD63     | 329.49 | 342.15 | 309.07 | 316.87 | 324.83 | 310.04 | 278.12 | 293.57 |
| KRT15    | 337.5  | 327.88 | 343.16 | 336.04 | 291.34 | 312.39 | 297.45 | 300.98 |
| ADRM1    | 312.43 | 305.22 | 286.13 | 269.21 | 297.23 | 313.42 | 224.59 | 253.19 |
| EIF5A    | 310.86 | 320.29 | 296.8  | 293.39 | 331.53 | 314.75 | 265.56 | 285.74 |

|          |        |        |        |        |        |        |        |        |
|----------|--------|--------|--------|--------|--------|--------|--------|--------|
| PPP1R14B | 297.11 | 293.92 | 279.24 | 251.17 | 312.63 | 315.47 | 231.41 | 258.06 |
| TUBB3    | 290.04 | 293.37 | 270.49 | 252.18 | 293.34 | 317.2  | 222.32 | 246.07 |
| PCBP1    | 312.14 | 314.24 | 304.27 | 295.99 | 309.76 | 317.84 | 255.97 | 277.54 |
| FDFT1    | 253.69 | 301.45 | 260.78 | 265    | 306.06 | 320.41 | 285.89 | 320.45 |
| CD151    | 343.98 | 343.11 | 327.67 | 312.08 | 308.82 | 320.64 | 257.47 | 270.3  |
| MMP14    | 346.91 | 368.76 | 342.58 | 344.95 | 312    | 323.58 | 277.68 | 298.77 |
| UCHL1    | 303.43 | 315.54 | 307.42 | 295.52 | 345.13 | 323.85 | 305.47 | 307.62 |
| SHC1     | 360.75 | 359.1  | 342.96 | 339.19 | 317.16 | 325.49 | 287.47 | 296.2  |
| KRT17    | 382.21 | 387.48 | 383.18 | 346.29 | 358.53 | 328.38 | 273.84 | 275.36 |
| FKBP8    | 354.74 | 357.22 | 334.86 | 311.44 | 320.86 | 330.52 | 234.11 | 272.12 |
| EIF4H    | 345.01 | 348.13 | 341.14 | 335.53 | 341.15 | 331.5  | 307.41 | 308.33 |
| PRDX2    | 307.59 | 312.17 | 293.56 | 277.9  | 336.22 | 331.92 | 269.41 | 278.49 |
| CHCHD2   | 339.72 | 336.7  | 326.94 | 292.5  | 344.39 | 332    | 291.15 | 298.39 |
| CHCHD10  | 315.09 | 312.74 | 300.86 | 256.04 | 314.81 | 332.89 | 229.07 | 261.63 |
| PDLIM1   | 416.85 | 414.39 | 395.36 | 383.43 | 335.51 | 333.3  | 308.55 | 298.75 |
| CD9      | 274.19 | 294.5  | 267.97 | 277.96 | 329.05 | 336.8  | 304.06 | 322.78 |
| MARCKSL1 | 356.35 | 382.02 | 359.65 | 351.88 | 340.94 | 337.42 | 278.38 | 309.52 |
| GPX1     | 360.99 | 370.56 | 339.7  | 299.9  | 333.99 | 340.26 | 242.24 | 269.41 |
| CRIP2    | 384.92 | 380.75 | 354.87 | 343.02 | 326.54 | 346.53 | 231.86 | 271.83 |
| PRKCSH   | 398.9  | 401.25 | 371.62 | 358.61 | 339.8  | 348.92 | 289.77 | 307.37 |
| RPL37    | 419.46 | 408.61 | 382.34 | 389.13 | 360.5  | 350.56 | 344.24 | 329.84 |
| ATP5E    | 357.3  | 372.76 | 338.26 | 345.94 | 374.32 | 352.43 | 360.14 | 340.23 |
| TUBA1C   | 340.32 | 343.04 | 326.79 | 301.98 | 342.9  | 353.07 | 297.22 | 320.88 |
| CDKN1A   | 247.08 | 273.47 | 252.43 | 243.01 | 367.02 | 361.71 | 302.03 | 321.99 |
| KRT8     | 361.67 | 387.15 | 348.52 | 323.64 | 345.9  | 363    | 275.89 | 310.84 |
| PPDPF    | 417.69 | 406.55 | 389.55 | 367.55 | 356.15 | 364.3  | 249.01 | 304.23 |
| SLC25A5  | 334.98 | 350.63 | 338.5  | 314.16 | 376.84 | 366.71 | 333.96 | 340.37 |
| PYGB     | 323.02 | 324.94 | 309.24 | 296.47 | 368.11 | 369.98 | 310.57 | 326.09 |
| SLC16A3  | 448.36 | 454.97 | 420.53 | 397.34 | 349.32 | 373.7  | 274.01 | 308.78 |
| CHPF     | 445.61 | 462.36 | 413.39 | 391.67 | 330.9  | 378.1  | 252.89 | 293.54 |
| TINAGL1  | 359.56 | 382.11 | 341.67 | 336.15 | 340.84 | 379.77 | 277.54 | 334.24 |
| DDR1     | 412.18 | 439.52 | 397.6  | 403.56 | 361.31 | 380.24 | 306.58 | 342.71 |
| TAGLN2   | 453.2  | 460.76 | 432.26 | 406.89 | 403.4  | 382.57 | 331.04 | 331.77 |
| CTSD     | 397.03 | 404.76 | 374.19 | 348.96 | 367.66 | 382.74 | 286.07 | 307.14 |
| RPL32    | 431.97 | 424.16 | 413.28 | 400.9  | 404.24 | 386.21 | 375.21 | 371.33 |
| COX6A1   | 380.73 | 380.91 | 368.14 | 360.83 | 382.84 | 389.61 | 310.23 | 360.17 |
| GNB2     | 402.11 | 415.83 | 381.02 | 351.66 | 374.27 | 389.91 | 286.63 | 318.06 |
| COX4I1   | 383.52 | 390.45 | 376.88 | 360.72 | 411.57 | 391.01 | 353.21 | 362.66 |
| UBL5     | 385.09 | 414.26 | 369.64 | 367.21 | 388.31 | 391.06 | 324.69 | 355.78 |
| HSPA1B   | 453.22 | 447.16 | 425    | 397.39 | 383.56 | 391.77 | 297.17 | 341.08 |
| TKT      | 346.69 | 365.49 | 334.07 | 311.29 | 392.49 | 392.36 | 307.21 | 333.93 |
| GNAS     | 390.53 | 421.19 | 389.87 | 379.31 | 385.6  | 392.56 | 367.7  | 368.36 |
| PSMA7    | 397.82 | 396.76 | 369.96 | 353.72 | 396.39 | 395.66 | 321.09 | 337.83 |
| NACA     | 394.98 | 399.51 | 408.85 | 423.26 | 402.4  | 395.73 | 474.25 | 462.52 |
| MIR205HG | 444.93 | 466.33 | 458.03 | 496.63 | 408.18 | 396.95 | 418.2  | 459.14 |
| AHCY     | 343.76 | 339.52 | 318.92 | 300.44 | 393.17 | 398.51 | 314.68 | 336.49 |
| AGRN     | 471.23 | 466.99 | 441.47 | 432.84 | 365.99 | 401.37 | 302.34 | 332.48 |
| TPT1     | 431.55 | 426.72 | 440.8  | 426.38 | 429.95 | 403.57 | 429.16 | 425.4  |
| EEF1B2   | 418.52 | 407.14 | 397.95 | 373.48 | 448.02 | 411.13 | 396.28 | 428.35 |
| TP11     | 517.43 | 528.78 | 497.65 | 460.55 | 399.66 | 411.17 | 359.98 | 373.72 |
| TCEB2    | 405.74 | 402.29 | 388.36 | 369.7  | 394.07 | 413.08 | 325.27 | 343.64 |
| ATP5B    | 380.83 | 391.76 | 374.34 | 342.73 | 421.9  | 416.1  | 378.36 | 390.01 |
| LDHB     | 382.47 | 377.39 | 391.28 | 400.32 | 439.31 | 417.01 | 477.65 | 465.94 |
| APP      | 415.55 | 419.34 | 428.63 | 449.32 | 426.43 | 417.09 | 453.64 | 447.22 |
| LMNA     | 450.85 | 434.55 | 426.05 | 381.77 | 396.45 | 419.38 | 312.46 | 346.28 |
| GPX4     | 446.74 | 447.9  | 428.69 | 396.96 | 430.43 | 422.04 | 315.04 | 344.29 |
| EIF1     | 418.88 | 445.93 | 428.19 | 403.09 | 445.4  | 423.37 | 415.02 | 413.28 |
| RPL36A   | 487.92 | 508.71 | 474.63 | 489.05 | 486.85 | 427.41 | 453.56 | 452.28 |
| PSAP     | 427.81 | 447.46 | 425.83 | 424.81 | 421.83 | 428.62 | 397.57 | 404.28 |
| RPL34    | 488.17 | 473.77 | 482.59 | 453.42 | 461.76 | 429.19 | 479.21 | 445.41 |
| IGFBP4   | 457.29 | 476.43 | 440.4  | 410.16 | 415.69 | 432.3  | 331.41 | 375.28 |
| RPL5     | 419.58 | 400.65 | 426.74 | 412.55 | 461.86 | 433.8  | 469.21 | 468.18 |
| IGFBP2   | 469.99 | 473.13 | 442.49 | 399.09 | 406.23 | 434.4  | 292.5  | 325.91 |
| OAZ1     | 434.62 | 461.45 | 407.35 | 399.17 | 409.27 | 435.62 | 342.79 | 358.21 |
| ARHGDI1A | 449.78 | 454.26 | 416.74 | 396.1  | 442.82 | 435.83 | 328.07 | 359.95 |
| SFN      | 409.1  | 426.61 | 378.79 | 360.95 | 437.95 | 443.93 | 320.2  | 377.82 |
| COX8A    | 462.41 | 461.55 | 441.52 | 404.82 | 462.54 | 455.09 | 359.34 | 386.15 |
| RPL13    | 519.07 | 510.57 | 484.07 | 437.89 | 458.9  | 471.4  | 347.19 | 383.04 |
| ATP1A1   | 466.34 | 495.13 | 462.01 | 457.12 | 467.81 | 477.32 | 439.12 | 477.45 |
| RPS29    | 605.2  | 586.02 | 513.35 | 495.93 | 503.93 | 486.81 | 395.17 | 445.72 |
| PFN1     | 523.43 | 540.9  | 495.93 | 462.22 | 507.79 | 514.27 | 409.5  | 443.5  |
| FLNA     | 543.6  | 526.35 | 509.72 | 477.87 | 492.58 | 514.75 | 410.86 | 432.4  |
| HSPA8    | 537.99 | 508.32 | 534.38 | 520.36 | 551.98 | 522.36 | 557.33 | 519.53 |
| GSTP1    | 504.29 | 524.43 | 488.64 | 448.18 | 528.91 | 523.68 | 414.26 | 445.87 |
| SCD      | 364.43 | 454.42 | 391.34 | 452.65 | 473.89 | 527.5  | 494.25 | 547.63 |
| GRN      | 508.21 | 506.24 | 478.76 | 460.55 | 501.47 | 528.96 | 408.88 | 438.22 |
| FSCN1    | 603.31 | 591.19 | 566.84 | 512.2  | 496.3  | 529.15 | 381.86 | 423.67 |
| H3F3A    | 525.45 | 535.67 | 547.03 | 550.19 | 549.43 | 537.81 | 603.04 | 554.33 |
| NPM1     | 514.09 | 498.03 | 539.53 | 571.53 | 592.02 | 541.93 | 710.03 | 661.6  |
| RPL38    | 534.32 | 586.72 | 509.02 | 513.93 | 519.07 | 550.52 | 451.65 | 458.78 |
| YBX1     | 557.78 | 564.05 | 548.28 | 536.49 | 553.57 | 553.71 | 487.66 | 496.84 |
| P4HB     | 655.15 | 664.78 | 613.35 | 600.96 | 559.03 | 576    | 491.9  | 512.98 |
| LGALS3BP | 745.79 | 778.39 | 711.93 | 687.6  | 554.62 | 579.04 | 479.4  | 504.12 |
| COX7C    | 593.02 | 592.88 | 577.14 | 580.08 | 616.27 | 593.7  | 589.85 | 602.03 |
| RPL15    | 624.65 | 635.81 | 609.89 | 571.62 | 632.11 | 594.17 | 563.69 | 556.4  |
| FTL      | 599.78 | 613    | 588.04 | 555.51 | 595.69 | 594.59 | 491.3  | 548.71 |
| SLC25A6  | 587.46 | 574.84 | 560.79 | 517.16 | 573.33 | 596.54 | 435.88 | 496.21 |

|          |         |         |         |         |         |         |         |         |
|----------|---------|---------|---------|---------|---------|---------|---------|---------|
| RPL21    | 590.85  | 646.74  | 638.93  | 638.8   | 656.66  | 597.86  | 657.38  | 640.73  |
| RPS27A   | 658.2   | 660.63  | 651.94  | 656.43  | 663.17  | 603.08  | 711.19  | 702.95  |
| HNRNPA1  | 637.46  | 619.61  | 655.44  | 655.86  | 667.28  | 605.49  | 707.04  | 703.32  |
| PTMA     | 660.15  | 653.39  | 646.1   | 638.71  | 661.89  | 607.91  | 575.57  | 613.2   |
| TUBA1B   | 691.67  | 692.63  | 672.82  | 611     | 633.69  | 613.76  | 540.8   | 563.58  |
| PPIA     | 582.51  | 589.56  | 579.96  | 573.92  | 617.74  | 614.14  | 612.6   | 612.37  |
| MDK      | 659.52  | 694.35  | 636.2   | 621.51  | 593.01  | 617.12  | 459.1   | 529.42  |
| RPS24    | 667.61  | 664.59  | 650.88  | 652.25  | 660.41  | 619.41  | 694.92  | 689.33  |
| BTF3     | 627.88  | 590.45  | 640.81  | 643.28  | 669.07  | 623.77  | 722.58  | 681.38  |
| UBC      | 633.98  | 663.3   | 644.47  | 608.88  | 679.48  | 651.41  | 628.75  | 607.47  |
| ITGA3    | 745.25  | 746.1   | 702.99  | 686.68  | 620.16  | 656.48  | 537.05  | 572.96  |
| RPS25    | 727.73  | 687.71  | 695.87  | 685.5   | 709.82  | 675.71  | 692.78  | 674.08  |
| BSG      | 730.46  | 743.87  | 690.47  | 647.67  | 670.24  | 679.38  | 505.26  | 557.28  |
| FAU      | 707.68  | 711.69  | 680.25  | 619.42  | 683.92  | 679.38  | 543.42  | 586.15  |
| CFL1     | 707.74  | 742.96  | 689.64  | 657.69  | 700.32  | 689.06  | 570.95  | 624.55  |
| TMSB4X   | 773.85  | 764.35  | 803.39  | 829.28  | 729.97  | 694.82  | 781.93  | 771.95  |
| ANXA2    | 692.81  | 705.42  | 701.18  | 676.17  | 721.37  | 705.06  | 718.83  | 655.98  |
| CST3     | 653.1   | 667.11  | 627.92  | 575.26  | 679.41  | 713.59  | 505.08  | 572.86  |
| CKB      | 851.04  | 828.79  | 788.96  | 724.62  | 651.05  | 717.21  | 496.34  | 561.03  |
| S100A6   | 610.07  | 611.17  | 579.94  | 545.26  | 731.6   | 731.6   | 570.58  | 640.64  |
| RPL14    | 684.39  | 688.87  | 706.9   | 702.21  | 768.17  | 737.29  | 764.84  | 727.22  |
| RPL24    | 801.03  | 822.11  | 796.39  | 753.51  | 796.3   | 747.95  | 743.13  | 722.27  |
| RPL10    | 932.07  | 931.11  | 900.25  | 831.81  | 746.22  | 749.03  | 647.26  | 697.77  |
| RPL26    | 804.2   | 804.03  | 807.83  | 851.31  | 840.04  | 779.63  | 865.67  | 808.05  |
| TUBB     | 923.33  | 934.28  | 886.26  | 827.16  | 784.58  | 785.43  | 700.19  | 703.82  |
| RPS3A    | 867.33  | 887.39  | 854.59  | 820.75  | 876.57  | 816.6   | 862.91  | 848.29  |
| RPS13    | 924.33  | 927.54  | 942.45  | 877.63  | 891.49  | 824.86  | 903.91  | 863.5   |
| S100A11  | 1006.89 | 1069.99 | 994.93  | 941.14  | 848.75  | 830.47  | 775.31  | 817.29  |
| HSP90AB1 | 857.3   | 854.87  | 848.43  | 834.51  | 867.45  | 831.73  | 833.84  | 854.58  |
| PKM      | 1035.24 | 1044.38 | 985.32  | 913.65  | 861.39  | 872.43  | 737.86  | 776.88  |
| CALR     | 932.93  | 1035.95 | 917.23  | 920.35  | 889.24  | 894.84  | 791.02  | 885.03  |
| FASN     | 518.87  | 626.09  | 524.59  | 558.92  | 736.14  | 898.97  | 588.81  | 744.9   |
| S100A2   | 784.9   | 799.62  | 792.35  | 734.9   | 970.69  | 903.39  | 806.05  | 844.01  |
| RPL39    | 994.31  | 1004.66 | 994.79  | 940.49  | 947.68  | 906.17  | 903.27  | 925.36  |
| RPL35A   | 998.81  | 973.9   | 948.33  | 932.25  | 961.35  | 922.62  | 877.04  | 861.1   |
| NME2     | 895.31  | 901.1   | 833.72  | 798.42  | 974.71  | 935.39  | 828.36  | 816.7   |
| RPS7     | 962.4   | 982.73  | 951.21  | 923.53  | 982.32  | 936.37  | 922.17  | 942.56  |
| LGALS1   | 992.16  | 968.79  | 899.41  | 841.79  | 938.57  | 939.84  | 706.49  | 769.98  |
| RPL10A   | 989.47  | 976.29  | 979.57  | 940.7   | 980.68  | 943.06  | 932.16  | 912.87  |
| PABPC1   | 934.21  | 961.61  | 950.8   | 948.37  | 971.12  | 950.01  | 934.51  | 943.82  |
| RPL18    | 1062.73 | 1081.93 | 1007.84 | 907.6   | 940.27  | 960.23  | 743.98  | 796.92  |
| RPL28    | 1069.03 | 1005.36 | 1003.28 | 922.45  | 936.4   | 966.27  | 734.66  | 787.92  |
| RPSA     | 953.56  | 985.28  | 936.78  | 855.69  | 1008.6  | 974.47  | 883.67  | 897.78  |
| VIM      | 991.73  | 957.95  | 969.19  | 923.5   | 975.13  | 988.06  | 911.52  | 902.65  |
| FTH1     | 1002.71 | 1041.29 | 979.44  | 931.06  | 985.14  | 996.19  | 843.24  | 862.72  |
| RPS3     | 1068.42 | 1118.6  | 1021.98 | 998.95  | 1059.93 | 1029.85 | 871.63  | 963.38  |
| RPL36    | 1176.61 | 1184.76 | 1144.11 | 1027.98 | 1056.32 | 1030.76 | 816.71  | 903.27  |
| RPL30    | 1163.86 | 1149.99 | 1084.88 | 1045.11 | 1115.44 | 1033.87 | 1035.01 | 1014.54 |
| RPS15    | 1127.4  | 1144.7  | 1078.97 | 973.48  | 1009.08 | 1060.66 | 783.29  | 821.92  |
| RPL6     | 1039.06 | 1035.69 | 1105.69 | 1112.42 | 1126.34 | 1092.99 | 1222.77 | 1220.33 |
| RPL7     | 1116.72 | 1163.08 | 1124.82 | 1144.59 | 1155.5  | 1105.56 | 1218.11 | 1237.49 |
| RPS4X    | 1149.98 | 1145.43 | 1172.55 | 1140.38 | 1122.07 | 1105.96 | 1163.66 | 1160.42 |
| RPL31    | 1143.63 | 1159.75 | 1094.83 | 1101.64 | 1168.91 | 1119.61 | 1139.61 | 1063.33 |
| RPS10    | 1204.2  | 1207.72 | 1182.15 | 1060.21 | 1181.99 | 1151.88 | 1027.08 | 1014.25 |
| RPL23A   | 1208.51 | 1237.11 | 1178.94 | 1133.59 | 1179.37 | 1155.53 | 1117.92 | 1160.31 |
| RPL9     | 1248.58 | 1264.22 | 1210.71 | 1147.99 | 1243.75 | 1155.99 | 1215.43 | 1189.85 |
| IFITM3   | 1925.83 | 1994.36 | 1843.25 | 1737.6  | 1177.42 | 1169.56 | 924.63  | 972.33  |
| RPS20    | 1191.05 | 1236.58 | 1196.83 | 1118.29 | 1225.42 | 1173.19 | 1054.17 | 1106.48 |
| RPS17    | 1298.68 | 1277.84 | 1242.62 | 1185.08 | 1184.42 | 1179.95 | 1084.5  | 1060.43 |
| RPS5     | 1230.72 | 1256.51 | 1141.45 | 1091.93 | 1157.55 | 1200.73 | 972.47  | 963.53  |
| EEF2     | 1197.16 | 1163.58 | 1115.6  | 1044.07 | 1203.23 | 1222.23 | 933.5   | 1016.32 |
| HSPB1    | 1599.94 | 1604.03 | 1485.26 | 1402.54 | 1168.08 | 1286.19 | 844.6   | 991.58  |
| RPL17    | 1340.54 | 1295.31 | 1309.79 | 1358.8  | 1309.16 | 1290.2  | 1371.03 | 1355.96 |
| RPL35    | 1445.29 | 1472.19 | 1376.27 | 1235.47 | 1347.37 | 1292.4  | 1077.82 | 1120.36 |
| UBB      | 1367.25 | 1454.99 | 1363.14 | 1258.3  | 1319.61 | 1320.98 | 1149.88 | 1196.62 |
| RPS9     | 1520.92 | 1538.81 | 1443.75 | 1320.51 | 1392.64 | 1353.19 | 1045.84 | 1144.17 |
| RPL12    | 1498.6  | 1506.77 | 1438.94 | 1394.49 | 1475.26 | 1375.84 | 1273.27 | 1285.42 |
| MIF      | 1575.9  | 1558.54 | 1450.3  | 1306.46 | 1314.16 | 1399.42 | 936.27  | 1045.06 |
| RPL29    | 1525.37 | 1597.52 | 1486.35 | 1432.17 | 1480.47 | 1413.78 | 1208.01 | 1315.43 |
| RPS16    | 1586.14 | 1604.63 | 1506.79 | 1400.21 | 1429.11 | 1422.01 | 1151.53 | 1171.21 |
| RPS15A   | 1585.04 | 1563.78 | 1582.91 | 1489.37 | 1514.96 | 1439.92 | 1463.32 | 1470.69 |
| ALDOA    | 1833.43 | 1850.59 | 1706.81 | 1548.66 | 1375.18 | 1451.73 | 1123.15 | 1212.11 |
| UBA52    | 1515.78 | 1545.58 | 1469.47 | 1438.91 | 1496.75 | 1452.21 | 1294.45 | 1383.15 |
| RPL11    | 1594.23 | 1508.87 | 1590.99 | 1610.07 | 1509.18 | 1493.04 | 1581.42 | 1540.65 |
| RPL23    | 1540.97 | 1550    | 1552.6  | 1539.67 | 1625.89 | 1504.23 | 1568.1  | 1572.16 |
| RPS12    | 1599.01 | 1628.44 | 1601.04 | 1529.3  | 1535.11 | 1508.08 | 1421.37 | 1557.63 |
| RPL41    | 1790.23 | 1757.48 | 1694.66 | 1656.88 | 1653.33 | 1573.74 | 1457.33 | 1412.78 |
| RACK1    | 1666.57 | 1649.13 | 1640.61 | 1540.08 | 1666.42 | 1611.07 | 1477.6  | 1542.92 |
| RPL7A    | 1682.21 | 1691.02 | 1604.99 | 1501.87 | 1716.49 | 1637.24 | 1517.41 | 1518.03 |
| TMSB10   | 1813.07 | 1950.91 | 1822.72 | 1822.26 | 1641.06 | 1667.71 | 1394.35 | 1508.65 |
| RPL4     | 1708.71 | 1715.52 | 1675.75 | 1602.91 | 1744.56 | 1684.32 | 1614.14 | 1652.12 |
| EEF1G    | 1766.54 | 1856.73 | 1741.79 | 1612.83 | 1709.87 | 1691    | 1482.14 | 1584.2  |
| RPL3     | 1758.3  | 1757.83 | 1689.84 | 1574.02 | 1783.78 | 1709.6  | 1491.5  | 1596.52 |
| RPLP2    | 1922.94 | 1936.41 | 1842.53 | 1732.64 | 1820.31 | 1766.01 | 1434.37 | 1523.27 |
| RPS11    | 2014.24 | 2080.58 | 1878.23 | 1872.3  | 1838    | 1776.08 | 1548.14 | 1580.48 |
| RPL27    | 2053.47 | 2135.63 | 1976.96 | 1906.85 | 1930.14 | 1858.14 | 1625.51 | 1794.07 |
| ACTB     | 2170.37 | 2229.31 | 2073.94 | 1947.39 | 1851.13 | 1874    | 1557.96 | 1677.2  |
| RPS21    | 2065.33 | 2073    | 1976.4  | 1917.55 | 1917.78 | 1908.43 | 1589    | 1642.51 |

|        |         |         |         |         |         |         |         |         |
|--------|---------|---------|---------|---------|---------|---------|---------|---------|
| ENO1   | 2482.51 | 2512.83 | 2362.07 | 2203.76 | 1926.07 | 1965.7  | 1635.21 | 1683.57 |
| RPS8   | 2177.57 | 2218.15 | 2210.15 | 2076.33 | 2096.69 | 2031.47 | 1873.71 | 1986.06 |
| RPS19  | 2224.7  | 2264.36 | 2166.69 | 1935.75 | 2090.3  | 2043.61 | 1690.06 | 1741.43 |
| RPL37A | 2420.2  | 2423.71 | 2276.31 | 2243.51 | 2087.9  | 2101.32 | 1802.27 | 1849.88 |
| RPS27  | 2605.97 | 2639.96 | 2520.76 | 2464.63 | 2423.6  | 2158.8  | 2143.89 | 2286.12 |
| RPL13A | 2369.19 | 2382.31 | 2274.8  | 2089.98 | 2336.05 | 2244.98 | 1789.02 | 2024.22 |
| RPL19  | 2463.45 | 2526.14 | 2449.2  | 2311.36 | 2430.55 | 2296.15 | 2186.07 | 2259.83 |
| RPS14  | 2466.54 | 2474.01 | 2408.26 | 2239.13 | 2283.74 | 2296.4  | 1976.75 | 1928.39 |
| RPS28  | 2539.51 | 2675.22 | 2386.3  | 2290.19 | 2234.93 | 2317.38 | 1815.65 | 1866.36 |
| RPL8   | 2615.29 | 2693.99 | 2435.2  | 2298.37 | 2454.01 | 2439.5  | 1852.54 | 2097.69 |
| RPS6   | 2539.53 | 2562.85 | 2524.27 | 2475.62 | 2570    | 2447.63 | 2556.58 | 2585.43 |
| ACTG1  | 2863.07 | 2862.99 | 2716.47 | 2533.69 | 2588.4  | 2586.36 | 2110.35 | 2278.18 |
| RPLP0  | 2576.34 | 2685.34 | 2523.69 | 2380.35 | 2731.56 | 2694.15 | 2340.2  | 2444.88 |
| RPS18  | 3040.13 | 3119.2  | 3033.11 | 2885.69 | 2993.14 | 2863.61 | 2670.75 | 2698.28 |
| RPL18A | 3251.81 | 3163.58 | 3034.86 | 2836.97 | 2958.13 | 2976.28 | 2229.41 | 2375.96 |
| RPLP1  | 3483.96 | 3435.55 | 3284.86 | 2978.52 | 3259.9  | 3112.07 | 2455.31 | 2813.18 |
| RPS2   | 3610.49 | 3540.32 | 3347.66 | 3062.35 | 3645.59 | 3568.76 | 2643.8  | 3019.88 |
| GAPDH  | 4615.46 | 4626.32 | 4393.29 | 4118.53 | 3907.97 | 4045.97 | 3418    | 3511.21 |
| EEF1A1 | 5060.78 | 4927.76 | 5044.02 | 4968.78 | 5293.12 | 5069.77 | 5152.95 | 5181.59 |
