# Supplementary material for: Targeting AKT and CK2 represents a novel therapeutic strategy for SMO constitutive activation‐driven medulloblastoma
Source: PubMed Central journal article supplement (PMC9160449; doi:10.1111/cns.13835), 2022-04-14
Supplement: CNS-28-1033-s002.pdf [file CNS-28-1033-s002.pdf]

**Table S1. Geneset enrichment analysis using genes altered by LDE225 vs. DMSO in ONS76 with SMO<sup>WT</sup>.**

| Genesets enriched by downregulated genes from LDE225 vs. DMSO |                                                                                  |       |         |                |                 | Genesets enriched by upregulated genes from LDE225 vs. DMSO |                                                                                                 |       |        |                |                 |
|---------------------------------------------------------------|----------------------------------------------------------------------------------|-------|---------|----------------|-----------------|-------------------------------------------------------------|-------------------------------------------------------------------------------------------------|-------|--------|----------------|-----------------|
| Category                                                      | Term                                                                             | Count | %       | <i>P</i> Value | Fold Enrichment | Category                                                    | Term                                                                                            | Count | %      | <i>P</i> Value | Fold Enrichment |
| GO_BP                                                         | regulation of transcription, DNA-templated                                       | 215   | 13.2226 | 0.0000         | 1.6857          | GO_BP                                                       | rRNA processing                                                                                 | 44    | 4.0930 | 0.0000         | 3.6002          |
| GO_BP                                                         | transcription, DNA-templated                                                     | 248   | 15.2522 | 0.0000         | 1.4959          | GO_BP                                                       | translation                                                                                     | 48    | 4.4651 | 0.0000         | 3.3220          |
| GO_BP                                                         | cilium assembly                                                                  | 28    | 1.7220  | 0.0000         | 2.6627          | GO_BP                                                       | nuclear-transcribed mRNA catabolic process, nonsense-mediated decay                             | 28    | 2.6047 | 0.0000         | 4.1200          |
| GO_BP                                                         | RNA splicing                                                                     | 31    | 1.9065  | 0.0001         | 2.2021          | GO_BP                                                       | translational initiation                                                                        | 29    | 2.6977 | 0.0000         | 3.7065          |
| GO_BP                                                         | cellular response to DNA damage stimulus                                         | 36    | 2.2140  | 0.0001         | 2.0409          | GO_BP                                                       | mitochondrial translational elongation                                                          | 22    | 2.0465 | 0.0000         | 4.5320          |
| GO_BP                                                         | ubiquitin-dependent protein catabolic process                                    | 32    | 1.9680  | 0.0001         | 2.0733          | GO_BP                                                       | SRP-dependent cotranslational protein targeting to membrane                                     | 23    | 2.1395 | 0.0000         | 4.2843          |
| GO_BP                                                         | regulation of transcription from RNA polymerase II promoter                      | 61    | 3.7515  | 0.0002         | 1.6311          | GO_BP                                                       | mRNA splicing, via spliceosome                                                                  | 35    | 3.2558 | 0.0000         | 2.7606          |
| GO_BP                                                         | cell-cell adhesion                                                               | 42    | 2.5830  | 0.0002         | 1.8276          | GO_BP                                                       | mitochondrial translational termination                                                         | 20    | 1.8605 | 0.0000         | 4.0721          |
| GO_BP                                                         | protein ubiquitination involved in ubiquitin-dependent protein catabolic process | 28    | 1.7220  | 0.0002         | 2.1580          | GO_BP                                                       | viral transcription                                                                             | 23    | 2.1395 | 0.0000         | 3.5958          |
| GO_BP                                                         | protein ubiquitination                                                           | 51    | 3.1365  | 0.0003         | 1.6752          | GO_BP                                                       | ribosomal small subunit assembly                                                                | 9     | 0.8372 | 0.0000         | 8.2942          |
| GO_BP                                                         | fat cell differentiation                                                         | 17    | 1.0455  | 0.0003         | 2.7461          | GO_BP                                                       | cell-cell adhesion                                                                              | 34    | 3.1628 | 0.0000         | 2.1968          |
| GO_BP                                                         | pre-miRNA processing                                                             | 7     | 0.4305  | 0.0004         | 6.3496          | GO_BP                                                       | NIK/NF-kappaB signaling                                                                         | 14    | 1.3023 | 0.0001         | 3.7142          |
| GO_BP                                                         | mitotic nuclear division                                                         | 38    | 2.3370  | 0.0005         | 1.8069          | GO_BP                                                       | cell division                                                                                   | 38    | 3.5349 | 0.0002         | 1.9011          |
| GO_BP                                                         | mRNA splicing, via spliceosome                                                   | 35    | 2.1525  | 0.0005         | 1.8591          | GO_BP                                                       | mitochondrial electron transport, NADH to ubiquinone                                            | 11    | 1.0233 | 0.0004         | 3.9308          |
| GO_BP                                                         | protein K48-linked deubiquitination                                              | 9     | 0.5535  | 0.0006         | 4.4221          | GO_BP                                                       | mitochondrion organization                                                                      | 14    | 1.3023 | 0.0004         | 3.1836          |
| GO_BP                                                         | negative regulation of transcription, DNA-templated                              | 64    | 3.9360  | 0.0009         | 1.5124          | GO_BP                                                       | anaphase-promoting complex-dependent catabolic process                                          | 14    | 1.3023 | 0.0005         | 3.1030          |
| GO_BP                                                         | ER to Golgi vesicle-mediated transport                                           | 27    | 1.6605  | 0.0009         | 1.9899          | GO_BP                                                       | protein targeting to mitochondrion                                                              | 9     | 0.8372 | 0.0005         | 4.6350          |
| GO_BP                                                         | endosome organization                                                            | 10    | 0.6150  | 0.0010         | 3.6850          | GO_BP                                                       | positive regulation of t-circle formation                                                       | 4     | 0.3721 | 0.0007         | 17.5099         |
| GO_BP                                                         | in utero embryonic development                                                   | 30    | 1.8450  | 0.0011         | 1.8918          | GO_BP                                                       | antigen processing and presentation of exogenous peptide antigen via MHC class I, TAP-dependent | 12    | 1.1163 | 0.0008         | 3.3352          |
| GO_BP                                                         | cell division                                                                    | 48    | 2.9520  | 0.0011         | 1.6172          | GO_BP                                                       | intrinsic apoptotic signaling pathway in response to DNA damage by p53 class mediator           | 8     | 0.7442 | 0.0015         | 4.5187          |
| GO_BP                                                         | Golgi to plasma membrane protein transport                                       | 9     | 0.5535  | 0.0013         | 3.9307          | GO_BP                                                       | negative regulation of fibroblast proliferation                                                 | 8     | 0.7442 | 0.0015         | 4.5187          |

|       |                                                                                  |     |        |        |         |  |       |                                                                                                                  |    |        |        |         |
|-------|----------------------------------------------------------------------------------|-----|--------|--------|---------|--|-------|------------------------------------------------------------------------------------------------------------------|----|--------|--------|---------|
| GO_BP | intraciliary transport                                                           | 7   | 0.4305 | 0.0014 | 5.1591  |  | GO_BP | t-circle formation                                                                                               | 4  | 0.3721 | 0.0017 | 14.0079 |
| GO_BP | endocytosis                                                                      | 24  | 1.4760 | 0.0014 | 2.0361  |  | GO_BP | regulation of mRNA stability                                                                                     | 15 | 1.3953 | 0.0021 | 2.5500  |
| GO_BP | COPII vesicle coating                                                            | 14  | 0.8610 | 0.0015 | 2.7064  |  | GO_BP | regulation of cellular amino acid metabolic process                                                              | 10 | 0.9302 | 0.0022 | 3.4333  |
| GO_BP | protein localization to plasma membrane                                          | 14  | 0.8610 | 0.0021 | 2.6205  |  | GO_BP | negative regulation of ubiquitin-protein ligase activity involved in mitotic cell cycle                          | 12 | 1.1163 | 0.0022 | 2.9594  |
| GO_BP | pexophagy                                                                        | 4   | 0.2460 | 0.0023 | 11.7921 |  | GO_BP | mitochondrial respiratory chain complex I assembly                                                               | 11 | 1.0233 | 0.0028 | 3.0573  |
| GO_BP | mRNA processing                                                                  | 28  | 1.7220 | 0.0024 | 1.8446  |  | GO_BP | canonical glycolysis                                                                                             | 7  | 0.6512 | 0.0029 | 4.7142  |
| GO_BP | positive regulation of transcription from RNA polymerase II promoter             | 109 | 6.7036 | 0.0026 | 1.3102  |  | GO_BP | positive regulation of ubiquitin-protein ligase activity involved in regulation of mitotic cell cycle transition | 12 | 1.1163 | 0.0037 | 2.7647  |
| GO_BP | protein transport                                                                | 51  | 3.1365 | 0.0027 | 1.5225  |  | GO_BP | regulation of mitochondrial membrane potential                                                                   | 7  | 0.6512 | 0.0043 | 4.3775  |
| GO_BP | post-embryonic development                                                       | 15  | 0.9225 | 0.0030 | 2.4230  |  | GO_BP | protein stabilization                                                                                            | 17 | 1.5814 | 0.0047 | 2.1887  |
| GO_BP | visual learning                                                                  | 11  | 0.6765 | 0.0038 | 2.8825  |  | GO_BP | exonucleolytic nuclear-transcribed mRNA catabolic process involved in deadenylation-dependent decay              | 7  | 0.6512 | 0.0052 | 4.2265  |
| GO_BP | heart morphogenesis                                                              | 9   | 0.5535 | 0.0043 | 3.3165  |  | GO_BP | RNA catabolic process                                                                                            | 6  | 0.5581 | 0.0057 | 5.0028  |
| GO_BP | protein retention in Golgi apparatus                                             | 4   | 0.2460 | 0.0053 | 9.4337  |  | GO_BP | proteasome-mediated ubiquitin-dependent protein catabolic process                                                | 22 | 2.0465 | 0.0061 | 1.8976  |
| GO_BP | establishment of protein localization                                            | 10  | 0.6150 | 0.0054 | 2.9480  |  | GO_BP | intrinsic apoptotic signaling pathway                                                                            | 7  | 0.6512 | 0.0062 | 4.0856  |
| GO_BP | chromatin remodeling                                                             | 16  | 0.9840 | 0.0055 | 2.1939  |  | GO_BP | antigen processing and presentation of peptide antigen via MHC class I                                           | 7  | 0.6512 | 0.0062 | 4.0856  |
| GO_BP | hippo signaling                                                                  | 8   | 0.4920 | 0.0061 | 3.4940  |  | GO_BP | platelet aggregation                                                                                             | 8  | 0.7442 | 0.0079 | 3.4166  |
| GO_BP | epidermal growth factor receptor signaling pathway                               | 12  | 0.7380 | 0.0066 | 2.5269  |  | GO_BP | negative regulation of endoplasmic reticulum calcium ion concentration                                           | 4  | 0.3721 | 0.0083 | 8.7550  |
| GO_BP | positive regulation of proteasomal ubiquitin-dependent protein catabolic process | 13  | 0.7995 | 0.0069 | 2.3953  |  | GO_BP | positive regulation of IRE1-mediated unfolded protein response                                                   | 4  | 0.3721 | 0.0083 | 8.7550  |
| GO_BP | positive regulation of transcription, DNA-templated                              | 61  | 3.7515 | 0.0071 | 1.3967  |  | GO_BP | positive regulation of canonical Wnt signaling pathway                                                           | 15 | 1.3953 | 0.0084 | 2.1887  |
| GO_BP | RNA processing                                                                   | 17  | 1.0455 | 0.0073 | 2.0667  |  | GO_BP | release of cytochrome c from mitochondria                                                                        | 6  | 0.5581 | 0.0085 | 4.5678  |
| GO_BP | vesicle organization                                                             | 8   | 0.4920 | 0.0075 | 3.3692  |  | GO_BP | protein polyubiquitination                                                                                       | 20 | 1.8605 | 0.0090 | 1.9033  |
| GO_BP | definitive hemopoiesis                                                           | 6   | 0.3690 | 0.0086 | 4.4221  |  | GO_BP | extrinsic apoptotic signaling pathway                                                                            | 8  | 0.7442 | 0.0090 | 3.3352  |
| GO_BP | protein K63-linked deubiquitination                                              | 7   | 0.4305 | 0.0105 | 3.5889  |  | GO_BP | transcription-coupled nucleotide-excision repair                                                                 | 11 | 1.0233 | 0.0091 | 2.6028  |
| GO_BP | cilium morphogenesis                                                             | 21  | 1.2915 | 0.0106 | 1.8208  |  | GO_BP | antigen processing and presentation of endogenous peptide antigen via MHC class I via ER pathway, TAP-           | 3  | 0.2791 | 0.0094 | 17.5099 |

|       |                                                             |    |        |        |         |  |             |                                                                                                   |    |        |        |        |
|-------|-------------------------------------------------------------|----|--------|--------|---------|--|-------------|---------------------------------------------------------------------------------------------------|----|--------|--------|--------|
|       |                                                             |    |        |        |         |  | independent |                                                                                                   |    |        |        |        |
| GO_BP | Golgi to plasma membrane transport                          | 6  | 0.3690 | 0.0113 | 4.1619  |  | GO_BP       | termination of RNA polymerase II transcription                                                    | 10 | 0.9302 | 0.0101 | 2.7359 |
| GO_BP | protein phosphorylation                                     | 54 | 3.3210 | 0.0116 | 1.3964  |  | GO_BP       | ribosomal small subunit biogenesis                                                                | 5  | 0.4651 | 0.0110 | 5.4718 |
| GO_BP | protein polyubiquitination                                  | 26 | 1.5990 | 0.0126 | 1.6663  |  | GO_BP       | fatty acid beta-oxidation                                                                         | 8  | 0.7442 | 0.0116 | 3.1836 |
| GO_BP | snRNA transcription from RNA polymerase II promoter         | 13 | 0.7995 | 0.0139 | 2.1900  |  | GO_BP       | antigen processing and presentation of exogenous peptide antigen via MHC class I, TAP-independent | 4  | 0.3721 | 0.0120 | 7.7822 |
| GO_BP | covalent chromatin modification                             | 18 | 1.1070 | 0.0142 | 1.8784  |  | GO_BP       | glycine metabolic process                                                                         | 4  | 0.3721 | 0.0120 | 7.7822 |
| GO_BP | positive regulation of GTPase activity                      | 64 | 3.9360 | 0.0146 | 1.3357  |  | GO_BP       | RNA phosphodiester bond hydrolysis, endonucleolytic                                               | 9  | 0.8372 | 0.0122 | 2.8653 |
| GO_BP | cytoskeleton-dependent intracellular transport              | 6  | 0.3690 | 0.0146 | 3.9307  |  | GO_BP       | viral process                                                                                     | 28 | 2.6047 | 0.0124 | 1.6397 |
| GO_BP | protein targeting                                           | 9  | 0.5535 | 0.0150 | 2.7213  |  | GO_BP       | ribosome biogenesis                                                                               | 7  | 0.6512 | 0.0152 | 3.4047 |
| GO_BP | microtubule cytoskeleton organization                       | 13 | 0.7995 | 0.0155 | 2.1591  |  | GO_BP       | regulation of translational initiation                                                            | 7  | 0.6512 | 0.0152 | 3.4047 |
| GO_BP | regulation of cell morphogenesis                            | 7  | 0.4305 | 0.0160 | 3.3018  |  | GO_BP       | mitochondrial translation                                                                         | 7  | 0.6512 | 0.0152 | 3.4047 |
| GO_BP | RNA 3'-end processing                                       | 4  | 0.2460 | 0.0164 | 6.7384  |  | GO_BP       | antigen processing and presentation of exogenous peptide antigen via MHC class II                 | 12 | 1.1163 | 0.0155 | 2.2839 |
| GO_BP | miRNA loading onto RISC involved in gene silencing by miRNA | 4  | 0.2460 | 0.0164 | 6.7384  |  | GO_BP       | Wnt signaling pathway, planar cell polarity pathway                                               | 12 | 1.1163 | 0.0155 | 2.2839 |
| GO_BP | intraciliary transport involved in cilium morphogenesis     | 4  | 0.2460 | 0.0164 | 6.7384  |  | GO_BP       | DNA repair                                                                                        | 23 | 2.1395 | 0.0155 | 1.7137 |
| GO_BP | posttranscriptional gene silencing by RNA                   | 4  | 0.2460 | 0.0164 | 6.7384  |  | GO_BP       | negative regulation of hydrogen peroxide-induced cell death                                       | 4  | 0.3721 | 0.0164 | 7.0040 |
| GO_BP | miRNA metabolic process                                     | 4  | 0.2460 | 0.0164 | 6.7384  |  | GO_BP       | RNA methylation                                                                                   | 4  | 0.3721 | 0.0164 | 7.0040 |
| GO_BP | intracellular protein transport                             | 31 | 1.9065 | 0.0165 | 1.5490  |  | GO_BP       | tumor necrosis factor-mediated signaling pathway                                                  | 14 | 1.3023 | 0.0170 | 2.0774 |
| GO_BP | cytoskeleton organization                                   | 23 | 1.4145 | 0.0173 | 1.6846  |  | GO_BP       | retrograde vesicle-mediated transport, Golgi to ER                                                | 11 | 1.0233 | 0.0180 | 2.3489 |
| GO_BP | protein N-linked glycosylation via asparagine               | 9  | 0.5535 | 0.0174 | 2.6532  |  | GO_BP       | extrinsic apoptotic signaling pathway via death domain receptors                                  | 7  | 0.6512 | 0.0196 | 3.2255 |
| GO_BP | termination of RNA polymerase II transcription              | 12 | 0.7380 | 0.0178 | 2.2110  |  | GO_BP       | regulation of defense response to virus by virus                                                  | 6  | 0.5581 | 0.0197 | 3.7521 |
| GO_BP | negative regulation of myeloid cell differentiation         | 6  | 0.3690 | 0.0185 | 3.7238  |  | GO_BP       | I-kappaB kinase/NF-kappaB signaling                                                               | 9  | 0.8372 | 0.0201 | 2.6265 |
| GO_BP | spliceosomal complex assembly                               | 7  | 0.4305 | 0.0193 | 3.1748  |  | GO_BP       | protein homotetramerization                                                                       | 9  | 0.8372 | 0.0201 | 2.6265 |
| GO_BP | protein targeting to lysosome                               | 5  | 0.3075 | 0.0197 | 4.5354  |  | GO_BP       | positive regulation of proteolysis                                                                | 5  | 0.4651 | 0.0205 | 4.6079 |
| GO_BP | PMA-inducible membrane protein                              | 3  | 0.1845 | 0.0203 | 11.7921 |  | GO_BP       | mRNA 3'-end processing                                                                            | 8  | 0.7442 | 0.0225 | 2.8016 |

|       |                                                                         |    |        |        |        |  |       |                                                                                   |    |        |        |         |
|-------|-------------------------------------------------------------------------|----|--------|--------|--------|--|-------|-----------------------------------------------------------------------------------|----|--------|--------|---------|
|       | ectodomain proteolysis                                                  |    |        |        |        |  |       |                                                                                   |    |        |        |         |
| GO_BP | Golgi organization                                                      | 13 | 0.7995 | 0.0211 | 2.0716 |  | GO_BP | positive regulation of viral transcription                                        | 6  | 0.5581 | 0.0227 | 3.6227  |
| GO_BP | phosphatidylinositol biosynthetic process                               | 11 | 0.6765 | 0.0228 | 2.2364 |  | GO_BP | negative regulation of type I interferon production                               | 6  | 0.5581 | 0.0260 | 3.5020  |
| GO_BP | histone H3-K4 methylation                                               | 6  | 0.3690 | 0.0229 | 3.5376 |  | GO_BP | mitotic nuclear division                                                          | 23 | 2.1395 | 0.0267 | 1.6239  |
| GO_BP | mRNA 3'-end processing                                                  | 10 | 0.6150 | 0.0232 | 2.3584 |  | GO_BP | type I interferon signaling pathway                                               | 9  | 0.8372 | 0.0285 | 2.4623  |
| GO_BP | production of miRNAs involved in gene silencing by miRNA                | 4  | 0.2460 | 0.0246 | 5.8961 |  | GO_BP | cellular response to oxidative stress                                             | 9  | 0.8372 | 0.0285 | 2.4623  |
| GO_BP | protein targeting to vacuole                                            | 4  | 0.2460 | 0.0246 | 5.8961 |  | GO_BP | protection from natural killer cell mediated cytotoxicity                         | 3  | 0.2791 | 0.0290 | 10.5059 |
| GO_BP | regulation of protein kinase B signaling                                | 4  | 0.2460 | 0.0246 | 5.8961 |  | GO_BP | isocitrate metabolic process                                                      | 3  | 0.2791 | 0.0290 | 10.5059 |
| GO_BP | negative regulation of transcription from RNA polymerase II promoter    | 77 | 4.7355 | 0.0258 | 1.2611 |  | GO_BP | regulation of growth                                                              | 8  | 0.7442 | 0.0301 | 2.6430  |
| GO_BP | regulation of cell motility                                             | 7  | 0.4305 | 0.0273 | 2.9480 |  | GO_BP | positive regulation of translation                                                | 8  | 0.7442 | 0.0301 | 2.6430  |
| GO_BP | cellular component disassembly involved in execution phase of apoptosis | 6  | 0.3690 | 0.0281 | 3.3692 |  | GO_BP | negative regulation of protein catabolic process                                  | 6  | 0.5581 | 0.0334 | 3.2831  |
| GO_BP | ER-associated ubiquitin-dependent protein catabolic process             | 11 | 0.6765 | 0.0283 | 2.1619 |  | GO_BP | positive regulation of neuron apoptotic process                                   | 7  | 0.6512 | 0.0341 | 2.8504  |
| GO_BP | lysosome organization                                                   | 8  | 0.4920 | 0.0292 | 2.6205 |  | GO_BP | positive regulation of T cell mediated cytotoxicity                               | 4  | 0.3721 | 0.0344 | 5.3877  |
| GO_BP | spleen development                                                      | 8  | 0.4920 | 0.0292 | 2.6205 |  | GO_BP | RNA export from nucleus                                                           | 8  | 0.7442 | 0.0359 | 2.5469  |
| GO_BP | cellular response to UV                                                 | 9  | 0.5535 | 0.0297 | 2.4120 |  | GO_BP | stimulatory C-type lectin receptor signaling pathway                              | 12 | 1.1163 | 0.0370 | 2.0011  |
| GO_BP | mitotic cytokinesis                                                     | 7  | 0.4305 | 0.0321 | 2.8464 |  | GO_BP | intrinsic apoptotic signaling pathway in response to endoplasmic reticulum stress | 6  | 0.5581 | 0.0376 | 3.1836  |
| GO_BP | positive regulation of microtubule polymerization                       | 5  | 0.3075 | 0.0329 | 3.9307 |  | GO_BP | formation of translation preinitiation complex                                    | 5  | 0.4651 | 0.0392 | 3.8065  |
| GO_BP | negative regulation of cell-matrix adhesion                             | 5  | 0.3075 | 0.0329 | 3.9307 |  | GO_BP | establishment of protein localization to telomere                                 | 3  | 0.2791 | 0.0418 | 8.7550  |
| GO_BP | cell adhesion mediated by integrin                                      | 5  | 0.3075 | 0.0329 | 3.9307 |  | GO_BP | DNA double-strand break processing involved in repair via single-strand annealing | 3  | 0.2791 | 0.0418 | 8.7550  |
| GO_BP | phospholipid translocation                                              | 6  | 0.3690 | 0.0338 | 3.2160 |  | GO_BP | positive regulation of exit from mitosis                                          | 3  | 0.2791 | 0.0418 | 8.7550  |
| GO_BP | cell migration                                                          | 23 | 1.4145 | 0.0339 | 1.5769 |  | GO_BP | histone H4-R3 methylation                                                         | 3  | 0.2791 | 0.0418 | 8.7550  |
| GO_BP | protein complex assembly                                                | 17 | 1.0455 | 0.0355 | 1.7282 |  | GO_BP | mitotic sister chromatid cohesion                                                 | 4  | 0.3721 | 0.0420 | 5.0028  |
| GO_BP | face morphogenesis                                                      | 7  | 0.4305 | 0.0373 | 2.7515 |  | GO_BP | maturation of SSU-rRNA                                                            | 4  | 0.3721 | 0.0420 | 5.0028  |
| GO_BP | proteasome-mediated ubiquitin-dependent protein catabolic process       | 26 | 1.5990 | 0.0374 | 1.5103 |  | GO_BP | positive regulation of extrinsic apoptotic signaling pathway in absence of ligand | 4  | 0.3721 | 0.0420 | 5.0028  |
| GO_BP | regulation of alternative mRNA splicing, via                            | 8  | 0.4920 | 0.0382 | 2.4826 |  | GO_BP | negative regulation of protein binding                                            | 8  | 0.7442 | 0.0425 | 2.4575  |

|       |                                                                                             |     |         |        |        |  |       |                                                        |     |         |        |        |
|-------|---------------------------------------------------------------------------------------------|-----|---------|--------|--------|--|-------|--------------------------------------------------------|-----|---------|--------|--------|
|       | spliceosome                                                                                 |     |         |        |        |  |       |                                                        |     |         |        |        |
| GO_BP | mRNA cleavage involved in gene silencing by siRNA                                           | 3   | 0.1845  | 0.0384 | 8.8441 |  | GO_BP | cellular response to interleukin-4                     | 5   | 0.4651  | 0.0450 | 3.6479 |
| GO_BP | positive regulation of transcription from RNA polymerase II promoter in response to hypoxia | 3   | 0.1845  | 0.0384 | 8.8441 |  | GO_BP | Ras protein signal transduction                        | 9   | 0.8372  | 0.0452 | 2.2513 |
| GO_BP | negative regulation of sodium ion transport                                                 | 3   | 0.1845  | 0.0384 | 8.8441 |  | GO_BP | negative regulation of canonical Wnt signaling pathway | 16  | 1.4884  | 0.0460 | 1.7188 |
| GO_BP | T follicular helper cell differentiation                                                    | 3   | 0.1845  | 0.0384 | 8.8441 |  | GO_BP | organ regeneration                                     | 7   | 0.6512  | 0.0496 | 2.6079 |
| GO_BP | microtubule-based movement                                                                  | 13  | 0.7995  | 0.0396 | 1.8926 |  | GO_CC | nucleoplasm                                            | 289 | 26.8837 | 0.0000 | 1.8657 |
| GO_BP | RNA export from nucleus                                                                     | 10  | 0.6150  | 0.0403 | 2.1440 |  | GO_CC | mitochondrion                                          | 160 | 14.8837 | 0.0000 | 2.1605 |
| GO_BP | regulation of JNK cascade                                                                   | 5   | 0.3075  | 0.0410 | 3.6850 |  | GO_CC | cytosol                                                | 299 | 27.8140 | 0.0000 | 1.6210 |
| GO_BP | mRNA export from nucleus                                                                    | 15  | 0.9225  | 0.0423 | 1.7688 |  | GO_CC | cytoplasm                                              | 417 | 38.7907 | 0.0000 | 1.4352 |
| GO_BP | regulation of endocytosis                                                                   | 7   | 0.4305  | 0.0430 | 2.6627 |  | GO_CC | mitochondrial inner membrane                           | 72  | 6.6977  | 0.0000 | 2.9343 |
| GO_BP | cellular response to nerve growth factor stimulus                                           | 7   | 0.4305  | 0.0430 | 2.6627 |  | GO_CC | extracellular exosome                                  | 249 | 23.1628 | 0.0000 | 1.5920 |
| GO_BP | Wnt signaling pathway, calcium modulating pathway                                           | 8   | 0.4920  | 0.0433 | 2.4189 |  | GO_CC | ribosome                                               | 38  | 3.5349  | 0.0000 | 4.1142 |
| GO_BP | cerebral cortex development                                                                 | 10  | 0.6150  | 0.0446 | 2.1057 |  | GO_CC | nucleus                                                | 387 | 36.0000 | 0.0000 | 1.2845 |
| GO_BP | Wnt signaling pathway                                                                       | 24  | 1.4760  | 0.0449 | 1.5134 |  | GO_CC | membrane                                               | 180 | 16.7442 | 0.0000 | 1.4705 |
| GO_BP | vacuolar proton-transporting V-type ATPase complex assembly                                 | 4   | 0.2460  | 0.0464 | 4.7169 |  | GO_CC | small ribosomal subunit                                | 11  | 1.0233  | 0.0000 | 7.3221 |
| GO_BP | protein K11-linked deubiquitination                                                         | 4   | 0.2460  | 0.0464 | 4.7169 |  | GO_CC | cytosolic small ribosomal subunit                      | 14  | 1.3023  | 0.0000 | 5.2419 |
| GO_BP | peripheral nervous system neuron development                                                | 4   | 0.2460  | 0.0464 | 4.7169 |  | GO_CC | mitochondrial large ribosomal subunit                  | 14  | 1.3023  | 0.0000 | 5.2419 |
| GO_BP | endoplasmic reticulum mannose trimming                                                      | 4   | 0.2460  | 0.0464 | 4.7169 |  | GO_CC | mitochondrial matrix                                   | 41  | 3.8140  | 0.0000 | 2.2534 |
| GO_BP | negative regulation of osteoclast differentiation                                           | 6   | 0.3690  | 0.0475 | 2.9480 |  | GO_CC | catalytic step 2 spliceosome                           | 19  | 1.7674  | 0.0000 | 3.7117 |
| GO_BP | regulation of cell shape                                                                    | 19  | 1.1685  | 0.0491 | 1.6004 |  | GO_CC | cell-cell adherens junction                            | 38  | 3.5349  | 0.0000 | 2.1144 |
| GO_CC | nucleoplasm                                                                                 | 366 | 22.5092 | 0.0000 | 1.5877 |  | GO_CC | focal adhesion                                         | 43  | 4.0000  | 0.0000 | 1.9765 |
| GO_CC | nucleus                                                                                     | 608 | 37.3924 | 0.0000 | 1.3560 |  | GO_CC | nucleolus                                              | 77  | 7.1628  | 0.0000 | 1.6148 |
| GO_CC | cytoplasm                                                                                   | 546 | 33.5793 | 0.0000 | 1.2627 |  | GO_CC | mitochondrial respiratory chain complex I              | 12  | 1.1163  | 0.0001 | 4.4014 |
| GO_CC | nuclear speck                                                                               | 44  | 2.7060  | 0.0000 | 2.6437 |  | GO_CC | preribosome, large subunit precursor                   | 9   | 0.8372  | 0.0001 | 5.5776 |
| GO_CC | centrosome                                                                                  | 72  | 4.4280  | 0.0000 | 2.0412 |  | GO_CC | myelin sheath                                          | 21  | 1.9535  | 0.0003 | 2.4830 |

|       |                                                      |     |         |        |        |       |                                           |    |        |        |         |
|-------|------------------------------------------------------|-----|---------|--------|--------|-------|-------------------------------------------|----|--------|--------|---------|
| GO_CC | intracellular membrane-bounded organelle             | 82  | 5.0431  | 0.0000 | 1.7747 | GO_CC | mitochondrial nucleoid                    | 10 | 0.9302 | 0.0007 | 3.9939  |
| GO_CC | nucleolus                                            | 108 | 6.6421  | 0.0000 | 1.5219 | GO_CC | lysosome                                  | 25 | 2.3256 | 0.0018 | 1.9881  |
| GO_CC | Golgi apparatus                                      | 107 | 6.5806  | 0.0000 | 1.4974 | GO_CC | vesicle                                   | 17 | 1.5814 | 0.0020 | 2.3870  |
| GO_CC | cytosol                                              | 334 | 20.5412 | 0.0000 | 1.2168 | GO_CC | mitochondrial intermembrane space         | 12 | 1.1163 | 0.0025 | 2.9144  |
| GO_CC | ciliary basal body                                   | 22  | 1.3530  | 0.0000 | 2.7111 | GO_CC | U12-type spliceosomal complex             | 7  | 0.6512 | 0.0026 | 4.8387  |
| GO_CC | postsynaptic density                                 | 33  | 2.0295  | 0.0000 | 2.1660 | GO_CC | intercellular bridge                      | 9  | 0.8372 | 0.0026 | 3.6762  |
| GO_CC | cell-cell adherens junction                          | 48  | 2.9520  | 0.0001 | 1.7947 | GO_CC | spindle                                   | 16 | 1.4884 | 0.0029 | 2.3765  |
| GO_CC | ruffle                                               | 20  | 1.2300  | 0.0001 | 2.6837 | GO_CC | intracellular ribonucleoprotein complex   | 17 | 1.5814 | 0.0037 | 2.2465  |
| GO_CC | membrane                                             | 228 | 14.0221 | 0.0002 | 1.2516 | GO_CC | intracellular membrane-bounded organelle  | 47 | 4.3721 | 0.0049 | 1.5138  |
| GO_CC | trans-Golgi network                                  | 25  | 1.5375  | 0.0003 | 2.2200 | GO_CC | microtubule organizing center             | 18 | 1.6744 | 0.0050 | 2.1144  |
| GO_CC | intraciliary transport particle B                    | 8   | 0.4920  | 0.0005 | 5.0850 | GO_CC | cell body                                 | 10 | 0.9302 | 0.0077 | 2.8528  |
| GO_CC | primary cilium                                       | 17  | 1.0455  | 0.0006 | 2.6321 | GO_CC | extracellular matrix                      | 28 | 2.6047 | 0.0080 | 1.7001  |
| GO_CC | lamellipodium                                        | 27  | 1.6605  | 0.0007 | 2.0380 | GO_CC | nuclear speck                             | 21 | 1.9535 | 0.0085 | 1.8777  |
| GO_CC | COPII vesicle coat                                   | 6   | 0.3690  | 0.0007 | 7.2461 | GO_CC | Slx1-Slx4 complex                         | 3  | 0.2791 | 0.0089 | 17.9724 |
| GO_CC | Golgi membrane                                       | 72  | 4.4280  | 0.0009 | 1.4713 | GO_CC | MCM complex                               | 4  | 0.3721 | 0.0112 | 7.9877  |
| GO_CC | nuclear matrix                                       | 19  | 1.1685  | 0.0009 | 2.3656 | GO_CC | peroxisome                                | 13 | 1.2093 | 0.0127 | 2.2465  |
| GO_CC | intracellular                                        | 142 | 8.7331  | 0.0012 | 1.2875 | GO_CC | spliceosomal complex                      | 12 | 1.1163 | 0.0151 | 2.2943  |
| GO_CC | nuclear membrane                                     | 34  | 2.0910  | 0.0012 | 1.7931 | GO_CC | MHC class I protein complex               | 4  | 0.3721 | 0.0202 | 6.5354  |
| GO_CC | perinuclear region of cytoplasm                      | 73  | 4.4895  | 0.0022 | 1.4197 | GO_CC | MLL1 complex                              | 6  | 0.5581 | 0.0205 | 3.7184  |
| GO_CC | Cajal body                                           | 12  | 0.7380  | 0.0026 | 2.8416 | GO_CC | cytoplasmic microtubule                   | 8  | 0.7442 | 0.0220 | 2.8192  |
| GO_CC | ciliary tip                                          | 11  | 0.6765  | 0.0027 | 3.0192 | GO_CC | lipid particle                            | 9  | 0.8372 | 0.0293 | 2.4508  |
| GO_CC | microtubule organizing center                        | 24  | 1.4760  | 0.0037 | 1.8944 | GO_CC | exon-exon junction complex                | 5  | 0.4651 | 0.0312 | 4.0846  |
| GO_CC | chromosome, telomeric region                         | 11  | 0.6765  | 0.0038 | 2.8879 | GO_CC | small nucleolar ribonucleoprotein complex | 4  | 0.3721 | 0.0322 | 5.5300  |
| GO_CC | midbody                                              | 21  | 1.2915  | 0.0046 | 1.9660 | GO_CC | PRC1 complex                              | 4  | 0.3721 | 0.0322 | 5.5300  |
| GO_CC | transcriptional repressor complex                    | 12  | 0.7380  | 0.0048 | 2.6350 | GO_CC | cytoplasmic exosome (RNase complex)       | 4  | 0.3721 | 0.0322 | 5.5300  |
| GO_CC | chromosome                                           | 18  | 1.1070  | 0.0055 | 2.0703 | GO_CC | lysosomal membrane                        | 24 | 2.2326 | 0.0323 | 1.5742  |
| GO_CC | cell cortex                                          | 20  | 1.2300  | 0.0059 | 1.9637 | GO_CC | centrosome                                | 34 | 3.1628 | 0.0341 | 1.4344  |
| GO_CC | PML body                                             | 17  | 1.0455  | 0.0065 | 2.0950 | GO_CC | cytosolic large ribosomal subunit         | 9  | 0.8372 | 0.0343 | 2.3787  |
| GO_CC | cis-Golgi network                                    | 10  | 0.6150  | 0.0065 | 2.8754 | GO_CC | U4/U6 x U5 tri-snRNP complex              | 5  | 0.4651 | 0.0361 | 3.9070  |
| GO_CC | ciliary rootlet                                      | 5   | 0.3075  | 0.0065 | 6.0384 | GO_CC | anaphase-promoting complex                | 5  | 0.4651 | 0.0361 | 3.9070  |
| GO_CC | spindle pole                                         | 18  | 1.1070  | 0.0081 | 1.9943 | GO_CC | COPI vesicle coat                         | 4  | 0.3721 | 0.0394 | 5.1350  |
| GO_CC | endoplasmic reticulum-Golgi intermediate compartment | 13  | 0.7995  | 0.0093 | 2.3088 | GO_CC | microtubule cytoskeleton                  | 14 | 1.3023 | 0.0416 | 1.8366  |

|       |                                             |    |        |        |        |  |       |                                            |     |        |        |        |
|-------|---------------------------------------------|----|--------|--------|--------|--|-------|--------------------------------------------|-----|--------|--------|--------|
| GO_CC | micro-ribonucleoprotein complex             | 4  | 0.2460 | 0.0093 | 8.0512 |  | GO_CC | integral component of peroxisomal membrane | 4   | 0.3721 | 0.0472 | 4.7926 |
| GO_CC | Golgi cisterna                              | 5  | 0.3075 | 0.0096 | 5.4895 |  | GO_CC | eukaryotic 43S preinitiation complex       | 4   | 0.3721 | 0.0472 | 4.7926 |
| GO_CC | RISC complex                                | 5  | 0.3075 | 0.0096 | 5.4895 |  | GO_CC | eukaryotic 48S preinitiation complex       | 4   | 0.3721 | 0.0472 | 4.7926 |
| GO_CC | focal adhesion                              | 47 | 2.8905 | 0.0098 | 1.4517 |  | GO_CC | precatalytic spliceosome                   | 5   | 0.4651 | 0.0473 | 3.5945 |
| GO_CC | cilium                                      | 22 | 1.3530 | 0.0129 | 1.7595 |  | GO_CC | proteasome complex                         | 8   | 0.7442 | 0.0479 | 2.3963 |
| GO_CC | kinetochore                                 | 14 | 0.8610 | 0.0152 | 2.0874 |  | KEGG  | Ribosome                                   | 36  | 3.3488 | 0.0000 | 4.0919 |
| GO_CC | RISC-loading complex                        | 4  | 0.2460 | 0.0154 | 6.9011 |  | KEGG  | Parkinson's disease                        | 30  | 2.7907 | 0.0000 | 3.2659 |
| GO_CC | endosome membrane                           | 25 | 1.5375 | 0.0185 | 1.6320 |  | KEGG  | Biosynthesis of amino acids                | 19  | 1.7674 | 0.0000 | 4.0793 |
| GO_CC | microtubule associated complex              | 8  | 0.4920 | 0.0194 | 2.8416 |  | KEGG  | Huntington's disease                       | 33  | 3.0698 | 0.0000 | 2.6569 |
| GO_CC | actin cytoskeleton                          | 28 | 1.7220 | 0.0227 | 1.5512 |  | KEGG  | Alzheimer's disease                        | 29  | 2.6977 | 0.0000 | 2.6684 |
| GO_CC | phosphatidylinositol 3-kinase complex       | 5  | 0.3075 | 0.0238 | 4.3132 |  | KEGG  | Oxidative phosphorylation                  | 25  | 2.3256 | 0.0000 | 2.9057 |
| GO_CC | ER to Golgi transport vesicle membrane      | 10 | 0.6150 | 0.0256 | 2.3225 |  | KEGG  | Non-alcoholic fatty liver disease (NAFLD)  | 25  | 2.3256 | 0.0000 | 2.5593 |
| GO_CC | cytoplasmic mRNA processing body            | 13 | 0.7995 | 0.0261 | 2.0128 |  | KEGG  | Spliceosome                                | 21  | 1.9535 | 0.0003 | 2.4408 |
| GO_CC | nuclear pore                                | 12 | 0.7380 | 0.0338 | 2.0128 |  | KEGG  | Metabolic pathways                         | 105 | 9.7674 | 0.0010 | 1.3315 |
| GO_CC | neuromuscular junction                      | 10 | 0.6150 | 0.0354 | 2.1958 |  | KEGG  | Carbon metabolism                          | 17  | 1.5814 | 0.0023 | 2.3256 |
| GO_CC | transcriptionally active chromatin          | 6  | 0.3690 | 0.0369 | 3.1505 |  | KEGG  | Biosynthesis of antibiotics                | 26  | 2.4186 | 0.0023 | 1.8958 |
| GO_CC | spindle                                     | 17 | 1.0455 | 0.0413 | 1.6968 |  | KEGG  | Epstein-Barr virus infection               | 17  | 1.5814 | 0.0050 | 2.1540 |
| GO_CC | ciliary transition zone                     | 6  | 0.3690 | 0.0436 | 3.0192 |  | KEGG  | 2-Oxocarboxylic acid metabolism            | 5   | 0.4651 | 0.0208 | 4.5466 |
| GO_CC | oligosaccharyltransferase complex           | 4  | 0.2460 | 0.0436 | 4.8307 |  | KEGG  | Proteasome                                 | 8   | 0.7442 | 0.0213 | 2.8106 |
| GO_CC | axon                                        | 27 | 1.6605 | 0.0454 | 1.4688 |  | KEGG  | Sulfur relay system                        | 4   | 0.3721 | 0.0228 | 6.1834 |
| GO_CC | endoplasmic reticulum membrane              | 86 | 5.2891 | 0.0499 | 1.2049 |  | KEGG  | Viral carcinogenesis                       | 22  | 2.0465 | 0.0232 | 1.6590 |
| KEGG  | Thyroid hormone signaling pathway           | 23 | 1.4145 | 0.0000 | 2.8544 |  | KEGG  | RNA degradation                            | 11  | 1.0233 | 0.0254 | 2.2083 |
| KEGG  | Ubiquitin mediated proteolysis              | 24 | 1.4760 | 0.0001 | 2.5002 |  | KEGG  | Herpes simplex infection                   | 20  | 1.8605 | 0.0264 | 1.6894 |
| KEGG  | Proteoglycans in cancer                     | 30 | 1.8450 | 0.0001 | 2.1408 |  | KEGG  | Pyrimidine metabolism                      | 13  | 1.2093 | 0.0286 | 1.9897 |
| KEGG  | Prostate cancer                             | 17 | 1.0455 | 0.0003 | 2.7570 |  | KEGG  | Glycine, serine and threonine metabolism   | 7   | 0.6512 | 0.0372 | 2.7746 |
| KEGG  | Pathways in cancer                          | 46 | 2.8290 | 0.0006 | 1.6705 |  | KEGG  | Galactose metabolism                       | 6   | 0.5581 | 0.0409 | 3.0917 |
| KEGG  | Small cell lung cancer                      | 16 | 0.9840 | 0.0007 | 2.6865 |  | KEGG  | Lysosome                                   | 14  | 1.3023 | 0.0475 | 1.7886 |
| KEGG  | Endometrial cancer                          | 12 | 0.7380 | 0.0008 | 3.2935 |  |       |                                            |     |        |        |        |
| KEGG  | Spliceosome                                 | 21 | 1.2915 | 0.0009 | 2.2534 |  |       |                                            |     |        |        |        |
| KEGG  | FoxO signaling pathway                      | 20 | 1.2300 | 0.0023 | 2.1301 |  |       |                                            |     |        |        |        |
| KEGG  | Protein processing in endoplasmic reticulum | 23 | 1.4145 | 0.0033 | 1.9423 |  |       |                                            |     |        |        |        |
| KEGG  | Chronic myeloid leukemia                    | 13 | 0.7995 | 0.0039 | 2.5768 |  |       |                                            |     |        |        |        |

|      |                                                          |    |        |        |        |  |  |  |  |  |  |
|------|----------------------------------------------------------|----|--------|--------|--------|--|--|--|--|--|--|
| KEGG | Non-small cell lung cancer                               | 11 | 0.6765 | 0.0049 | 2.8034 |  |  |  |  |  |  |
| KEGG | Cell cycle                                               | 18 | 1.1070 | 0.0055 | 2.0717 |  |  |  |  |  |  |
| KEGG | Signaling pathways regulating pluripotency of stem cells | 19 | 1.1685 | 0.0085 | 1.9369 |  |  |  |  |  |  |
| KEGG | Estrogen signaling pathway                               | 15 | 0.9225 | 0.0086 | 2.1624 |  |  |  |  |  |  |
| KEGG | Focal adhesion                                           | 25 | 1.5375 | 0.0090 | 1.7320 |  |  |  |  |  |  |
| KEGG | Colorectal cancer                                        | 11 | 0.6765 | 0.0101 | 2.5321 |  |  |  |  |  |  |
| KEGG | mRNA surveillance pathway                                | 14 | 0.8610 | 0.0102 | 2.1957 |  |  |  |  |  |  |
| KEGG | Glioma                                                   | 11 | 0.6765 | 0.0140 | 2.4152 |  |  |  |  |  |  |
| KEGG | PI3K-Akt signaling pathway                               | 36 | 2.2140 | 0.0154 | 1.4892 |  |  |  |  |  |  |
| KEGG | Notch signaling pathway                                  | 9  | 0.5535 | 0.0170 | 2.6760 |  |  |  |  |  |  |
| KEGG | RNA degradation                                          | 12 | 0.7380 | 0.0174 | 2.2242 |  |  |  |  |  |  |
| KEGG | Sphingolipid signaling pathway                           | 16 | 0.9840 | 0.0196 | 1.9029 |  |  |  |  |  |  |
| KEGG | Epstein-Barr virus infection                             | 16 | 0.9840 | 0.0224 | 1.8717 |  |  |  |  |  |  |
| KEGG | Melanoma                                                 | 11 | 0.6765 | 0.0249 | 2.2111 |  |  |  |  |  |  |
| KEGG | Lysine degradation                                       | 9  | 0.5535 | 0.0266 | 2.4701 |  |  |  |  |  |  |
| KEGG | Endocytosis                                              | 26 | 1.5990 | 0.0296 | 1.5397 |  |  |  |  |  |  |
| KEGG | HIF-1 signaling pathway                                  | 13 | 0.7995 | 0.0346 | 1.9326 |  |  |  |  |  |  |
| KEGG | Pancreatic cancer                                        | 10 | 0.6150 | 0.0358 | 2.1957 |  |  |  |  |  |  |
| KEGG | Platelet activation                                      | 16 | 0.9840 | 0.0371 | 1.7565 |  |  |  |  |  |  |
| KEGG | Renal cell carcinoma                                     | 10 | 0.6150 | 0.0390 | 2.1624 |  |  |  |  |  |  |
| KEGG | Progesterone-mediated oocyte maturation                  | 12 | 0.7380 | 0.0391 | 1.9685 |  |  |  |  |  |  |
| KEGG | ErbB signaling pathway                                   | 12 | 0.7380 | 0.0391 | 1.9685 |  |  |  |  |  |  |
| KEGG | Phosphatidylinositol signaling system                    | 13 | 0.7995 | 0.0397 | 1.8932 |  |  |  |  |  |  |
| KEGG | Neurotrophin signaling pathway                           | 15 | 0.9225 | 0.0397 | 1.7840 |  |  |  |  |  |  |
| KEGG | p53 signaling pathway                                    | 10 | 0.6150 | 0.0423 | 2.1301 |  |  |  |  |  |  |
| KEGG | Hepatitis B                                              | 17 | 1.0455 | 0.0455 | 1.6732 |  |  |  |  |  |  |
| KEGG | mTOR signaling pathway                                   | 9  | 0.5535 | 0.0472 | 2.2146 |  |  |  |  |  |  |

**Table S2. Geneset enrichment analysis using genes altered by LDE225 vs. DMSO in ONS76 with SMO<sup>W535L</sup>.**

| Genesets enriched by downregulated genes from LDE225 vs. DMSO |      |       |   |                |                 | Genesets enriched by upregulated genes from LDE225 vs. DMSO |      |       |   |                |                 |
|---------------------------------------------------------------|------|-------|---|----------------|-----------------|-------------------------------------------------------------|------|-------|---|----------------|-----------------|
| Category                                                      | Term | Count | % | <i>P</i> Value | Fold Enrichment | Category                                                    | Term | Count | % | <i>P</i> Value | Fold Enrichment |



|       |                                                                     |    |        |        |         |       |                                                         |    |         |        |         |
|-------|---------------------------------------------------------------------|----|--------|--------|---------|-------|---------------------------------------------------------|----|---------|--------|---------|
| GO_BP | positive regulation of axonogenesis                                 | 6  | 1.4085 | 0.0001 | 12.4940 | GO_BP | protein transport                                       | 37 | 5.6402  | 0.0000 | 2.6888  |
| GO_BP | autophagy                                                           | 12 | 2.8169 | 0.0002 | 3.9455  | GO_BP | negative regulation of translation                      | 9  | 1.3720  | 0.0008 | 4.4541  |
| GO_BP | cell-cell adhesion                                                  | 17 | 3.9906 | 0.0005 | 2.7432  | GO_BP | vesicle-mediated transport                              | 15 | 2.2866  | 0.0009 | 2.8327  |
| GO_BP | retinoic acid receptor signaling pathway                            | 5  | 1.1737 | 0.0006 | 12.1470 | GO_BP | NLS-bearing protein import into nucleus                 | 6  | 0.9146  | 0.0010 | 7.4881  |
| GO_BP | viral transcription                                                 | 10 | 2.3474 | 0.0011 | 3.9044  | GO_BP | cell-cell adhesion                                      | 21 | 3.2012  | 0.0013 | 2.2243  |
| GO_BP | vascular endothelial growth factor receptor signaling pathway       | 8  | 1.8779 | 0.0013 | 4.8588  | GO_BP | tRNA methylation                                        | 6  | 0.9146  | 0.0018 | 6.6241  |
| GO_BP | branching involved in mammary gland duct morphogenesis              | 4  | 0.9390 | 0.0022 | 14.5764 | GO_BP | protein polyubiquitination                              | 16 | 2.4390  | 0.0020 | 2.4960  |
| GO_BP | mitochondrial respiratory chain complex I assembly                  | 7  | 1.6432 | 0.0031 | 4.8588  | GO_BP | transcription, DNA-templated                            | 92 | 14.0244 | 0.0022 | 1.3508  |
| GO_BP | translational initiation                                            | 10 | 2.3474 | 0.0042 | 3.1919  | GO_BP | cilium morphogenesis                                    | 13 | 1.9817  | 0.0028 | 2.7438  |
| GO_BP | mitochondrial electron transport, NADH to ubiquinone                | 6  | 1.4085 | 0.0050 | 5.3546  | GO_BP | negative regulation of endothelial cell proliferation   | 6  | 0.9146  | 0.0030 | 5.9388  |
| GO_BP | neurotrophin TRK receptor signaling pathway                         | 4  | 0.9390 | 0.0053 | 10.9323 | GO_BP | Golgi to endosome transport                             | 5  | 0.7622  | 0.0037 | 7.5538  |
| GO_BP | SRP-dependent cotranslational protein targeting to membrane         | 8  | 1.8779 | 0.0057 | 3.7216  | GO_BP | cilium assembly                                         | 12 | 1.8293  | 0.0040 | 2.7778  |
| GO_BP | protein destabilization                                             | 5  | 1.1737 | 0.0080 | 6.2470  | GO_BP | negative regulation of canonical Wnt signaling pathway  | 14 | 2.1341  | 0.0046 | 2.4654  |
| GO_BP | cellular triglyceride homeostasis                                   | 3  | 0.7042 | 0.0101 | 18.7411 | GO_BP | regulation of filopodium assembly                       | 4  | 0.6098  | 0.0056 | 10.4379 |
| GO_BP | rRNA processing                                                     | 12 | 2.8169 | 0.0102 | 2.4521  | GO_BP | small GTPase mediated signal transduction               | 18 | 2.7439  | 0.0056 | 2.1003  |
| GO_BP | ER-associated ubiquitin-dependent protein catabolic process         | 6  | 1.4085 | 0.0118 | 4.3729  | GO_BP | cell division                                           | 23 | 3.5061  | 0.0056 | 1.8863  |
| GO_BP | positive regulation of protein catabolic process                    | 6  | 1.4085 | 0.0118 | 4.3729  | GO_BP | mitotic nuclear division                                | 18 | 2.7439  | 0.0062 | 2.0834  |
| GO_BP | response to retinoic acid                                           | 5  | 1.1737 | 0.0139 | 5.3328  | GO_BP | regulation of transcription, DNA-templated              | 71 | 10.8232 | 0.0072 | 1.3551  |
| GO_BP | response to hypoxia                                                 | 10 | 2.3474 | 0.0173 | 2.5424  | GO_BP | endocytosis                                             | 12 | 1.8293  | 0.0093 | 2.4781  |
| GO_BP | adipose tissue development                                          | 4  | 0.9390 | 0.0187 | 6.9967  | GO_BP | snRNA transcription from RNA polymerase II promoter     | 8  | 1.2195  | 0.0107 | 3.2805  |
| GO_BP | endoplasmic reticulum unfolded protein response                     | 5  | 1.1737 | 0.0190 | 4.8588  | GO_BP | positive regulation of xenophagy                        | 3  | 0.4573  | 0.0113 | 17.2226 |
| GO_BP | nuclear-transcribed mRNA catabolic process, nonsense-mediated decay | 8  | 1.8779 | 0.0193 | 2.9398  | GO_BP | tRNA modification                                       | 5  | 0.7622  | 0.0135 | 5.3156  |
| GO_BP | glucose 6-phosphate metabolic process                               | 3  | 0.7042 | 0.0207 | 13.1188 | GO_BP | Golgi to plasma membrane protein transport              | 5  | 0.7622  | 0.0135 | 5.3156  |
| GO_BP | UDP-N-acetylglucosamine biosynthetic process                        | 3  | 0.7042 | 0.0249 | 11.9261 | GO_BP | negative regulation of protein binding                  | 7  | 1.0671  | 0.0139 | 3.5251  |
| GO_BP | regulation of mitochondrial membrane potential                      | 4  | 0.9390 | 0.0253 | 6.2470  | GO_BP | double-strand break repair via homologous recombination | 8  | 1.2195  | 0.0143 | 3.1032  |

|       |                                                                                  |     |         |        |         |       |                                                                          |     |         |        |         |
|-------|----------------------------------------------------------------------------------|-----|---------|--------|---------|-------|--------------------------------------------------------------------------|-----|---------|--------|---------|
| GO_BP | positive regulation of viral transcription                                       | 4   | 0.9390  | 0.0277 | 6.0316  | GO_BP | transforming growth factor beta receptor signaling pathway               | 9   | 1.3720  | 0.0147 | 2.8080  |
| GO_BP | cellular response to glucose starvation                                          | 4   | 0.9390  | 0.0277 | 6.0316  | GO_BP | vesicle organization                                                     | 5   | 0.7622  | 0.0153 | 5.1258  |
| GO_BP | response to endoplasmic reticulum stress                                         | 6   | 1.4085  | 0.0283 | 3.4983  | GO_BP | mesoderm formation                                                       | 5   | 0.7622  | 0.0153 | 5.1258  |
| GO_BP | lateral ventricle development                                                    | 3   | 0.7042  | 0.0294 | 10.9323 | GO_BP | regulation of translational termination                                  | 3   | 0.4573  | 0.0165 | 14.3521 |
| GO_BP | translation                                                                      | 12  | 2.8169  | 0.0312 | 2.0741  | GO_BP | SNARE complex assembly                                                   | 3   | 0.4573  | 0.0165 | 14.3521 |
| GO_BP | positive regulation of epithelial cell migration                                 | 4   | 0.9390  | 0.0388 | 5.3005  | GO_BP | heart looping                                                            | 7   | 1.0671  | 0.0190 | 3.2939  |
| GO_BP | retrograde protein transport, ER to cytosol                                      | 3   | 0.7042  | 0.0394 | 9.3705  | GO_BP | negative regulation of BMP signaling pathway                             | 6   | 0.9146  | 0.0194 | 3.8272  |
| GO_BP | endocytosis                                                                      | 8   | 1.8779  | 0.0402 | 2.5168  | GO_BP | negative regulation of protein import into nucleus                       | 3   | 0.4573  | 0.0226 | 12.3018 |
| GO_BP | activation of cysteine-type endopeptidase activity involved in apoptotic process | 6   | 1.4085  | 0.0412 | 3.1611  | GO_BP | mRNA transport                                                           | 6   | 0.9146  | 0.0231 | 3.6644  |
| GO_BP | protein autophosphorylation                                                      | 9   | 2.1127  | 0.0438 | 2.2882  | GO_BP | protein K48-linked ubiquitination                                        | 6   | 0.9146  | 0.0231 | 3.6644  |
| GO_BP | ERAD pathway                                                                     | 3   | 0.7042  | 0.0448 | 8.7458  | GO_BP | mRNA catabolic process                                                   | 4   | 0.6098  | 0.0231 | 6.3787  |
| GO_BP | G-protein coupled acetylcholine receptor signaling pathway                       | 3   | 0.7042  | 0.0448 | 8.7458  | GO_BP | regulation of Wnt signaling pathway                                      | 4   | 0.6098  | 0.0268 | 6.0430  |
| GO_BP | positive regulation of protein serine/threonine kinase activity                  | 4   | 0.9390  | 0.0450 | 4.9976  | GO_BP | regulation of signal transduction by p53 class mediator                  | 10  | 1.5244  | 0.0291 | 2.3149  |
| GO_BP | regulation of glucose import in response to insulin stimulus                     | 2   | 0.4695  | 0.0451 | 43.7292 | GO_BP | protein desumoylation                                                    | 3   | 0.4573  | 0.0294 | 10.7641 |
| GO_BP | IRE1-mediated unfolded protein response                                          | 5   | 1.1737  | 0.0455 | 3.7059  | GO_BP | myoblast migration                                                       | 3   | 0.4573  | 0.0294 | 10.7641 |
| GO_CC | nucleoplasm                                                                      | 98  | 23.0047 | 0.0000 | 1.6078  | GO_BP | regulation of transforming growth factor beta receptor signaling pathway | 4   | 0.6098  | 0.0307 | 5.7409  |
| GO_CC | membrane                                                                         | 80  | 18.7793 | 0.0000 | 1.6609  | GO_BP | retrograde transport, endosome to Golgi                                  | 7   | 1.0671  | 0.0326 | 2.9120  |
| GO_CC | cytosol                                                                          | 108 | 25.3521 | 0.0000 | 1.4880  | GO_BP | regulation of protein localization                                       | 6   | 0.9146  | 0.0340 | 3.3120  |
| GO_CC | cytoplasm                                                                        | 153 | 35.9155 | 0.0000 | 1.3382  | GO_BP | positive regulation of protein autophosphorylation                       | 4   | 0.6098  | 0.0349 | 5.4675  |
| GO_CC | cell-cell adherens junction                                                      | 19  | 4.4601  | 0.0003 | 2.6867  | GO_BP | melanosome transport                                                     | 4   | 0.6098  | 0.0349 | 5.4675  |
| GO_CC | ribosome                                                                         | 13  | 3.0516  | 0.0003 | 3.5769  | GO_BP | cell cycle checkpoint                                                    | 3   | 0.4573  | 0.0370 | 9.5681  |
| GO_CC | extracellular exosome                                                            | 84  | 19.7183 | 0.0021 | 1.3649  | GO_BP | embryo development                                                       | 5   | 0.7622  | 0.0420 | 3.7769  |
| GO_CC | focal adhesion                                                                   | 19  | 4.4601  | 0.0025 | 2.2195  | GO_BP | ureteric bud development                                                 | 5   | 0.7622  | 0.0420 | 3.7769  |
| GO_CC | endoplasmic reticulum membrane                                                   | 32  | 7.5117  | 0.0046 | 1.6956  | GO_BP | endosome to lysosome transport                                           | 5   | 0.7622  | 0.0456 | 3.6800  |
| GO_CC | perinuclear region of cytoplasm                                                  | 25  | 5.8685  | 0.0052 | 1.8387  | GO_BP | endocytic recycling                                                      | 4   | 0.6098  | 0.0493 | 4.7840  |
| GO_CC | endoplasmic reticulum                                                            | 30  | 7.0423  | 0.0085 | 1.6549  | GO_CC | cytosol                                                                  | 178 | 27.1341 | 0.0000 | 1.5885  |
| GO_CC | mitochondrion                                                                    | 43  | 10.0939 | 0.0103 | 1.4756  | GO_CC | nucleoplasm                                                              | 156 | 23.7805 | 0.0000 | 1.6577  |

|       |                                                            |     |         |        |         |       |                                           |     |         |        |         |
|-------|------------------------------------------------------------|-----|---------|--------|---------|-------|-------------------------------------------|-----|---------|--------|---------|
| GO_CC | cytoskeleton                                               | 16  | 3.7559  | 0.0169 | 1.9698  | GO_CC | cytoplasm                                 | 231 | 35.2134 | 0.0000 | 1.3087  |
| GO_CC | mitochondrial inner membrane                               | 18  | 4.2254  | 0.0173 | 1.8643  | GO_CC | membrane                                  | 112 | 17.0732 | 0.0000 | 1.5061  |
| GO_CC | nucleus                                                    | 139 | 32.6291 | 0.0174 | 1.1724  | GO_CC | intracellular                             | 71  | 10.8232 | 0.0001 | 1.5769  |
| GO_CC | mitochondrial respiratory chain complex I                  | 5   | 1.1737  | 0.0219 | 4.6606  | GO_CC | nucleus                                   | 224 | 34.1463 | 0.0002 | 1.2238  |
| GO_CC | midbody                                                    | 8   | 1.8779  | 0.0232 | 2.8325  | GO_CC | early endosome                            | 19  | 2.8963  | 0.0008 | 2.4546  |
| GO_MF | protein binding                                            | 251 | 58.9202 | 0.0000 | 1.2626  | GO_CC | centrosome                                | 28  | 4.2683  | 0.0013 | 1.9445  |
| GO_MF | cadherin binding involved in cell-cell adhesion            | 18  | 4.2254  | 0.0003 | 2.7429  | GO_CC | cell-cell adherens junction               | 23  | 3.5061  | 0.0015 | 2.1066  |
| GO_MF | protein complex binding                                    | 14  | 3.2864  | 0.0008 | 3.0033  | GO_CC | endosome membrane                         | 16  | 2.4390  | 0.0016 | 2.5587  |
| GO_MF | NADH dehydrogenase (ubiquinone) activity                   | 6   | 1.4085  | 0.0044 | 5.5239  | GO_CC | endosome                                  | 18  | 2.7439  | 0.0017 | 2.3668  |
| GO_MF | translation initiation factor binding                      | 4   | 0.9390  | 0.0112 | 8.4174  | GO_CC | chromosome, centromeric region            | 8   | 1.2195  | 0.0029 | 4.1522  |
| GO_MF | ferrous iron binding                                       | 4   | 0.9390  | 0.0128 | 8.0347  | GO_CC | retromer complex                          | 5   | 0.7622  | 0.0058 | 6.7237  |
| GO_MF | polyubiquitin binding                                      | 4   | 0.9390  | 0.0145 | 7.6854  | GO_CC | transcription factor complex              | 15  | 2.2866  | 0.0060 | 2.2993  |
| GO_MF | ubiquitin protein ligase activity involved in ERAD pathway | 3   | 0.7042  | 0.0165 | 14.7304 | GO_CC | nucleolus                                 | 43  | 6.5549  | 0.0100 | 1.4844  |
| GO_MF | enzyme binding                                             | 15  | 3.5211  | 0.0191 | 1.9906  | GO_CC | Golgi apparatus                           | 43  | 6.5549  | 0.0112 | 1.4741  |
| GO_MF | intermediate filament binding                              | 3   | 0.7042  | 0.0203 | 13.2573 | GO_CC | clathrin-coated vesicle                   | 7   | 1.0671  | 0.0132 | 3.5705  |
| GO_MF | kinase activity                                            | 12  | 2.8169  | 0.0212 | 2.2004  | GO_CC | cilium                                    | 12  | 1.8293  | 0.0135 | 2.3511  |
| GO_MF | poly(A) RNA binding                                        | 37  | 8.6854  | 0.0231 | 1.4482  | GO_CC | nuclear chromatin                         | 14  | 2.1341  | 0.0141 | 2.1460  |
| GO_MF | protein serine/threonine/tyrosine kinase activity          | 4   | 0.9390  | 0.0270 | 6.0953  | GO_CC | primary cilium                            | 8   | 1.2195  | 0.0161 | 3.0343  |
| GO_MF | DNA-(apurinic or apyrimidinic site) lyase activity         | 3   | 0.7042  | 0.0289 | 11.0478 | GO_CC | ciliary basal body                        | 9   | 1.3720  | 0.0178 | 2.7169  |
| GO_MF | structural constituent of ribosome                         | 11  | 2.5822  | 0.0295 | 2.1896  | GO_CC | peroxisome                                | 9   | 1.3720  | 0.0244 | 2.5602  |
| GO_MF | methylated histone binding                                 | 5   | 1.1737  | 0.0314 | 4.1690  | GO_CC | intraciliary transport particle B         | 4   | 0.6098  | 0.0248 | 6.2283  |
| GO_MF | identical protein binding                                  | 26  | 6.1033  | 0.0333 | 1.5340  | GO_CC | SMAD protein complex                      | 3   | 0.4573  | 0.0278 | 11.0942 |
| GO_MF | phosphoprotein binding                                     | 4   | 0.9390  | 0.0407 | 5.1990  | GO_CC | protein phosphatase type 2A complex       | 4   | 0.6098  | 0.0284 | 5.9169  |
| GO_MF | GTP-Rho binding                                            | 3   | 0.7042  | 0.0495 | 8.2858  | GO_CC | cell-cell junction                        | 12  | 1.8293  | 0.0318 | 2.0640  |
| GO_MF | phosphatidic acid binding                                  | 3   | 0.7042  | 0.0495 | 8.2858  | GO_CC | SNARE complex                             | 6   | 0.9146  | 0.0327 | 3.3492  |
| GO_MF | transforming growth factor beta binding                    | 3   | 0.7042  | 0.0495 | 8.2858  | GO_CC | recycling endosome                        | 9   | 1.3720  | 0.0327 | 2.4205  |
| KEGG  | Non-alcoholic fatty liver disease (NAFLD)                  | 11  | 2.5822  | 0.0046 | 2.8800  | GO_CC | VCP-NPL4-UFD1 AAA ATPase complex          | 3   | 0.4573  | 0.0350 | 9.8615  |
| KEGG  | Ribosome                                                   | 10  | 2.3474  | 0.0071 | 2.9069  | GO_CC | phagocytic vesicle                        | 5   | 0.7622  | 0.0416 | 3.7929  |
| KEGG  | Biosynthesis of antibiotics                                | 12  | 2.8169  | 0.0176 | 2.2378  | GO_CC | lysosomal membrane                        | 16  | 2.4390  | 0.0457 | 1.7276  |
| KEGG  | Oxidative phosphorylation                                  | 9   | 2.1127  | 0.0186 | 2.6753  | GO_CC | cytoskeleton                              | 20  | 3.0488  | 0.0476 | 1.5948  |
| KEGG  | Central carbon metabolism in cancer                        | 6   | 1.4085  | 0.0219 | 3.7064  | KEGG  | SNARE interactions in vesicular transport | 6   | 0.9146  | 0.0054 | 5.1657  |
| KEGG  | Protein processing in endoplasmic reticulum                | 10  | 2.3474  | 0.0263 | 2.3393  | KEGG  | RNA transport                             | 14  | 2.1341  | 0.0056 | 2.3826  |

|      |                                             |   |        |        |        |      |                                 |    |        |        |        |
|------|---------------------------------------------|---|--------|--------|--------|------|---------------------------------|----|--------|--------|--------|
| KEGG | Parkinson's disease                         | 9 | 2.1127 | 0.0264 | 2.5057 | KEGG | Endocytosis                     | 16 | 2.4390 | 0.0169 | 1.9434 |
| KEGG | Adipocytokine signaling pathway             | 6 | 1.4085 | 0.0309 | 3.3887 | KEGG | mRNA surveillance pathway       | 8  | 1.2195 | 0.0348 | 2.5734 |
| KEGG | Amino sugar and nucleotide sugar metabolism | 5 | 1.1737 | 0.0319 | 4.1182 | KEGG | Terpenoid backbone biosynthesis | 4  | 0.6098 | 0.0371 | 5.3222 |
| KEGG | Pyrimidine metabolism                       | 7 | 1.6432 | 0.0413 | 2.7400 | KEGG | Ubiquitin mediated proteolysis  | 10 | 1.5244 | 0.0435 | 2.1367 |

**Table S3. Geneset enrichment analysis using genes significantly upregulated by LDE225 vs. DMSO in ONST6 with SMO<sup>WT</sup>.**

| Category         | Term                                                                               | Count | %           | P Value     | Fold Enrichment |
|------------------|------------------------------------------------------------------------------------|-------|-------------|-------------|-----------------|
| GOTERM_BP_DIRECT | GO:0006355~regulation of transcription, DNA-templated                              | 77    | 17.11111111 | 7.36544E-11 | 2.187523686     |
| GOTERM_BP_DIRECT | GO:0006351~transcription, DNA-templated                                            | 83    | 18.44444444 | 7.49403E-08 | 1.814016387     |
| GOTERM_BP_DIRECT | GO:0042384~cilium assembly                                                         | 13    | 2.888888889 | 3.35395E-05 | 4.479520644     |
| GOTERM_BP_DIRECT | GO:2000114~regulation of establishment of cell polarity                            | 5     | 1.111111111 | 0.000546905 | 12.56698099     |
| GOTERM_BP_DIRECT | GO:0071108~protein K48-linked deubiquitination                                     | 5     | 1.111111111 | 0.002146184 | 8.901611535     |
| GOTERM_BP_DIRECT | GO:2000145~regulation of cell motility                                             | 5     | 1.111111111 | 0.003842757 | 7.629952744     |
| GOTERM_BP_DIRECT | GO:0006338~chromatin remodeling                                                    | 8     | 1.777777778 | 0.003957901 | 3.974673058     |
| GOTERM_BP_DIRECT | GO:0008380~RNA splicing                                                            | 11    | 2.444444444 | 0.005682507 | 2.831355958     |
| GOTERM_BP_DIRECT | GO:0007062~sister chromatid cohesion                                               | 8     | 1.777777778 | 0.010444004 | 3.318659058     |
| GOTERM_BP_DIRECT | GO:0051057~positive regulation of small GTPase mediated signal transduction        | 3     | 0.666666667 | 0.010561987 | 18.31188659     |
| GOTERM_BP_DIRECT | GO:0031123~RNA 3'-end processing                                                   | 3     | 0.666666667 | 0.010561987 | 18.31188659     |
| GOTERM_BP_DIRECT | GO:0035735~intraciliary transport involved in cilium morphogenesis                 | 3     | 0.666666667 | 0.010561987 | 18.31188659     |
| GOTERM_BP_DIRECT | GO:0006921~cellular component disassembly involved in execution phase of apoptosis | 4     | 0.888888889 | 0.0122877   | 8.138616261     |
| GOTERM_BP_DIRECT | GO:0045184~establishment of protein localization                                   | 5     | 1.111111111 | 0.013782579 | 5.340966921     |
| GOTERM_BP_DIRECT | GO:0006357~regulation of transcription from RNA polymerase II promoter             | 19    | 4.222222222 | 0.015820674 | 1.840877488     |
| GOTERM_BP_DIRECT | GO:0051301~cell division                                                           | 16    | 3.555555556 | 0.017847049 | 1.953267903     |
| GOTERM_BP_DIRECT | GO:0022604~regulation of cell morphogenesis                                        | 4     | 0.888888889 | 0.0198426   | 6.836437659     |
| GOTERM_BP_DIRECT | GO:0015031~protein transport                                                       | 17    | 3.777777778 | 0.023664078 | 1.838915193     |
| GOTERM_BP_DIRECT | GO:0033169~histone H3-K9 demethylation                                             | 3     | 0.666666667 | 0.026008912 | 11.65301874     |
| GOTERM_BP_DIRECT | GO:0016050~vesicle organization                                                    | 4     | 0.888888889 | 0.026853618 | 6.103962196     |
| GOTERM_BP_DIRECT | GO:0000281~mitotic cytokinesis                                                     | 4     | 0.888888889 | 0.029447107 | 5.893480741     |
| GOTERM_BP_DIRECT | GO:0006406~mRNA export from nucleus                                                | 7     | 1.555555556 | 0.029684369 | 2.990941476     |
| GOTERM_BP_DIRECT | GO:0007010~cytoskeleton organization                                               | 9     | 2           | 0.035426332 | 2.388506946     |
| GOTERM_BP_DIRECT | GO:0031054~pre-miRNA processing                                                    | 3     | 0.666666667 | 0.035772669 | 9.860246624     |
| GOTERM_BP_DIRECT | GO:0006622~protein targeting to lysosome                                           | 3     | 0.666666667 | 0.035772669 | 9.860246624     |
| GOTERM_BP_DIRECT | GO:0051492~regulation of stress fiber assembly                                     | 3     | 0.666666667 | 0.035772669 | 9.860246624     |

|                  |                                                                |     |              |             |             |
|------------------|----------------------------------------------------------------|-----|--------------|-------------|-------------|
| GOTERM_BP_DIRECT | GO:0007032~endosome organization                               | 4   | 0.888888889  | 0.037989116 | 5.340966921 |
| GOTERM_BP_DIRECT | GO:0006405~RNA export from nucleus                             | 5   | 1.111111111  | 0.039259768 | 3.884339579 |
| GOTERM_BP_DIRECT | GO:0006468~protein phosphorylation                             | 18  | 4            | 0.039399981 | 1.686621133 |
| GOTERM_BP_DIRECT | GO:0060271~cilium morphogenesis                                | 8   | 1.777777778  | 0.040464789 | 2.513396198 |
| GOTERM_BP_DIRECT | GO:0030833~regulation of actin filament polymerization         | 3   | 0.666666667  | 0.041102389 | 9.155943293 |
| GOTERM_BP_DIRECT | GO:0071044~histone mRNA catabolic process                      | 3   | 0.666666667  | 0.041102389 | 9.155943293 |
| GOTERM_BP_DIRECT | GO:0021591~ventricular system development                      | 3   | 0.666666667  | 0.041102389 | 9.155943293 |
| GOTERM_BP_DIRECT | GO:0007173~epidermal growth factor receptor signaling pathway  | 5   | 1.111111111  | 0.041530807 | 3.814976372 |
| GOTERM_BP_DIRECT | GO:0043547~positive regulation of GTPase activity              | 21  | 4.666666667  | 0.043400453 | 1.588110518 |
| GOTERM_BP_DIRECT | GO:0045892~negative regulation of transcription, DNA-templated | 19  | 4.222222222  | 0.045558087 | 1.62690776  |
| GOTERM_BP_DIRECT | GO:0070895~negative regulation of transposon integration       | 2   | 0.444444444  | 0.046145294 | 42.72773537 |
| GOTERM_CC_DIRECT | GO:0005634~nucleus                                             | 180 | 40           | 5.12805E-10 | 1.484764543 |
| GOTERM_CC_DIRECT | GO:0005813~centrosome                                          | 30  | 6.666666667  | 1.13492E-07 | 3.145539906 |
| GOTERM_CC_DIRECT | GO:0005654~nucleoplasm                                         | 102 | 22.666666667 | 2.78517E-07 | 1.636494253 |
| GOTERM_CC_DIRECT | GO:0005737~cytoplasm                                           | 156 | 34.666666667 | 2.11031E-05 | 1.334354653 |
| GOTERM_CC_DIRECT | GO:0005815~microtubule organizing center                       | 13  | 2.888888889  | 0.000170187 | 3.795206972 |
| GOTERM_CC_DIRECT | GO:0005622~intracellular                                       | 51  | 11.333333333 | 0.000209322 | 1.71021021  |
| GOTERM_CC_DIRECT | GO:0017053~transcriptional repressor complex                   | 8   | 1.777777778  | 0.000211956 | 6.496969697 |
| GOTERM_CC_DIRECT | GO:0043231~intracellular membrane-bounded organelle            | 27  | 6            | 0.000355352 | 2.161290323 |
| GOTERM_CC_DIRECT | GO:0001726~ruffle                                              | 9   | 2            | 0.000907361 | 4.466666667 |
| GOTERM_CC_DIRECT | GO:0016363~nuclear matrix                                      | 9   | 2            | 0.00147832  | 4.144329897 |
| GOTERM_CC_DIRECT | GO:0036064~ciliary basal body                                  | 9   | 2            | 0.001579055 | 4.102040816 |
| GOTERM_CC_DIRECT | GO:0031252~cell leading edge                                   | 6   | 1.333333333  | 0.001670396 | 6.871794872 |
| GOTERM_CC_DIRECT | GO:0030027~lamellipodium                                       | 11  | 2.444444444  | 0.00323323  | 3.070833333 |
| GOTERM_CC_DIRECT | GO:0016605~PML body                                            | 8   | 1.777777778  | 0.006386797 | 3.646258503 |
| GOTERM_CC_DIRECT | GO:0005874~microtubule                                         | 15  | 3.333333333  | 0.01058307  | 2.154340836 |
| GOTERM_CC_DIRECT | GO:0000922~spindle pole                                        | 8   | 1.777777778  | 0.011186817 | 3.278287462 |
| GOTERM_CC_DIRECT | GO:0005794~Golgi apparatus                                     | 31  | 6.888888889  | 0.011268113 | 1.604480494 |
| GOTERM_CC_DIRECT | GO:0015630~microtubule cytoskeleton                            | 9   | 2            | 0.011898821 | 2.934306569 |
| GOTERM_CC_DIRECT | GO:0005814~centriole                                           | 8   | 1.777777778  | 0.013452541 | 3.162241888 |
| GOTERM_CC_DIRECT | GO:0031965~nuclear membrane                                    | 12  | 2.666666667  | 0.014117951 | 2.340611354 |
| GOTERM_CC_DIRECT | GO:0000785~chromatin                                           | 7   | 1.555555556  | 0.014687161 | 3.513108614 |
| GOTERM_CC_DIRECT | GO:0030496~midbody                                             | 8   | 1.777777778  | 0.025830512 | 2.77002584  |

|                  |                                                                   |    |             |             |             |
|------------------|-------------------------------------------------------------------|----|-------------|-------------|-------------|
| GOTERM_CC_DIRECT | GO:0005925~focal adhesion                                         | 16 | 3.55555556  | 0.030007704 | 1.827791986 |
| GOTERM_CC_DIRECT | GO:0072372~primary cilium                                         | 6  | 1.333333333 | 0.030338508 | 3.435897436 |
| GOTERM_CC_DIRECT | GO:0005802~trans-Golgi network                                    | 8  | 1.777777778 | 0.0331219   | 2.62745098  |
| GOTERM_CC_DIRECT | GO:0019898~extrinsic component of membrane                        | 6  | 1.333333333 | 0.036522508 | 3.268292683 |
| GOTERM_CC_DIRECT | GO:0016607~nuclear speck                                          | 10 | 2.222222222 | 0.036854181 | 2.222222222 |
| GOTERM_CC_DIRECT | GO:0048471~perinuclear region of cytoplasm                        | 22 | 4.888888889 | 0.039798788 | 1.582393988 |
| GOTERM_CC_DIRECT | GO:0005829~cytosol                                                | 89 | 19.77777778 | 0.042240669 | 1.199195576 |
| KEGG_PATHWAY     | hsa05205:Proteoglycans in cancer                                  | 12 | 2.666666667 | 0.000743233 | 3.383114754 |
| KEGG_PATHWAY     | hsa04550:Signaling pathways regulating pluripotency of stem cells | 9  | 2           | 0.003137074 | 3.624765808 |
| KEGG_PATHWAY     | hsa05214:Glioma                                                   | 6  | 1.333333333 | 0.005519918 | 5.204791929 |
| KEGG_PATHWAY     | hsa05213:Endometrial cancer                                       | 5  | 1.111111111 | 0.01287443  | 5.42165826  |
| KEGG_PATHWAY     | hsa05200:Pathways in cancer                                       | 14 | 3.111111111 | 0.020196639 | 2.008634714 |
| KEGG_PATHWAY     | hsa05206:MicroRNAs in cancer                                      | 11 | 2.444444444 | 0.028646804 | 2.168663304 |
| KEGG_PATHWAY     | hsa04115:p53 signaling pathway                                    | 5  | 1.111111111 | 0.029848991 | 4.207854172 |
| KEGG_PATHWAY     | hsa04915:Estrogen signaling pathway                               | 6  | 1.333333333 | 0.029907007 | 3.41728763  |
| KEGG_PATHWAY     | hsa04917:Prolactin signaling pathway                              | 5  | 1.111111111 | 0.035886007 | 3.970791965 |
| KEGG_PATHWAY     | hsa05220:Chronic myeloid leukemia                                 | 5  | 1.111111111 | 0.037497812 | 3.915642077 |

**Table S4. Metabolite examination of ONS76 cells expressing SMO<sup>WT</sup> or SMO<sup>W535L</sup> with treatment of LDE225 or DMSO.**

| name         | adduct     | description                                             | m/z    | rt(s)  | W573L+D       | W573L+D  | W573L+D  | W573L+L  | W573L+L  | W573L+L  | WT+D         | WT+D         | WT+D         | WT+LD        | WT+LD        | WT+LD        |
|--------------|------------|---------------------------------------------------------|--------|--------|---------------|----------|----------|----------|----------|----------|--------------|--------------|--------------|--------------|--------------|--------------|
|              |            |                                                         |        |        | MSO-1         | MSO-2    | MSO-3    | DE225-1  | DE225-2  | DE225-3  | MSO-1        | MSO-2        | MSO-3        | E225-1       | E225-2       | E225-3       |
| M102T<br>765 | (M+H)+     | 1-Aminocyclopropanecarboxylic acid                      | 102.05 | 765.37 | 25922.48      | 28159.85 | 26573.67 | 27134.47 | 25707.56 | 29051.78 | 29784.3<br>8 | 25408.7<br>9 | 29517.6<br>4 | 32508.3<br>4 | 33312.8<br>1 | 30469.8<br>4 |
| M137T<br>557 | M+         | 1-Methylnicotinamide                                    | 137.07 | 556.86 | 33092.53      | 37164.38 | 34030.88 | 32428.46 | 28571.99 | 36725.32 | 17837.4<br>8 | 14272.8<br>0 | 9334.94<br>3 | 20816.0<br>3 | 22671.9<br>7 | 14625.3<br>1 |
| M833T<br>254 | (M-H+2Na)+ | 1-Stearoyl-2-oleoyl-sn-glycerol 3-phosphocholine (SOPC) | 832.58 | 254.25 | 7126.57       | 1312.72  | 2582.38  | 582.24   | 2084.34  | 1265.43  | 641.03       | 1180.01      | 871.36       | 981.38       | 2339.65      | 1683.26      |
| M359T<br>57  | (M+H)+     | 1-Stearoyl-sn-glycerol                                  | 359.32 | 57.25  | 118301.0<br>7 | 18910.71 | 37096.08 | 20520.77 | 75060.49 | 47580.57 | 23619.6<br>3 | 59436.9<br>2 | 24692.4<br>2 | 24123.6<br>8 | 38692.5<br>9 | 19994.2<br>5 |
| M524T<br>341 | (M+H)+     | 1-Stearoyl-sn-glycerol 3-phosphocholine                 | 524.37 | 341.10 | 20043.19      | 21038.92 | 15988.74 | 12732.47 | 17188.92 | 14072.98 | 14931.1<br>3 | 21675.1<br>1 | 19491.7<br>1 | 17157.8<br>2 | 17351.5<br>5 | 18148.0<br>8 |
| M383T<br>56  | (M+H-H2O)+ | 25-hydroxyvitamin D3                                    | 383.33 | 55.51  | 13711.45      | 16818.27 | 17764.65 | 16049.01 | 18984.61 | 18657.42 | 19757.4<br>6 | 25025.2<br>0 | 20662.9<br>6 | 15258.7<br>6 | 18418.2<br>5 | 16187.2<br>3 |

|              |                    |                                      |            |            |          |          |          |          |          |          |              |              |              |              |              |              |
|--------------|--------------------|--------------------------------------|------------|------------|----------|----------|----------|----------|----------|----------|--------------|--------------|--------------|--------------|--------------|--------------|
| M151T<br>115 | (M+CH3CO<br>O+2H)+ | 2-Ethoxyethanol                      | 151<br>.10 | 114<br>.91 | 44860.61 | 9208.93  | 39249.76 | 15726.48 | 9488.92  | 22227.07 | 5738.59      | 24279.3<br>4 | 8929.97      | 9267.52      | 72618.5<br>6 | 12289.1<br>9 |
| M299T<br>141 | (M+NH4)+           | 2'-O-methyladenosine                 | 299<br>.15 | 141<br>.37 | 2126.74  | 1291.49  | 24419.63 | 1367.54  | 1285.91  | 1239.60  | 1804.62      | 1413.23      | 1411.51      | 2100.72      | 1605.22      | 1281.61      |
| M324T<br>855 | (M-<br>2H+3Na)+    | 2'-O-methylcytidine                  | 324<br>.06 | 854<br>.50 | 1370.62  | 1659.30  | 1702.74  | 1664.83  | 1519.17  | 1796.72  | 1988.25      | 1616.08      | 1860.48      | 2278.67      | 2485.43      | 2142.47      |
| M130T<br>118 | (M+H)+             | 2-Pyrrolidineacetic acid             | 130<br>.09 | 118<br>.46 | 60388.59 | 49521.44 | 47879.72 | 50069.92 | 48431.42 | 57784.02 | 57807.1<br>2 | 39671.8<br>8 | 58367.1<br>1 | 54837.3<br>6 | 61237.7<br>9 | 47374.2<br>1 |
| M104T<br>80  | (M+H)+             | 3-Aminobutanoic acid                 | 104<br>.07 | 80.<br>23  | 6772.43  | 4998.56  | 4697.12  | 5011.58  | 3862.80  | 6964.39  | 4458.60      | 4909.50      | 5304.03      | 7842.74      | 7787.30      | 6655.99      |
| M320T<br>146 | (M+K)+             | 3'-O-methyladenosine                 | 320<br>.08 | 145<br>.59 | 5107.57  | 6335.81  | 6344.38  | 6397.03  | 5541.11  | 5230.41  | 6304.50      | 5404.16      | 5252.03      | 6945.21      | 5869.58      | 5433.64      |
| M187T<br>889 | (M+H)+             | 3-Phospho-D-glycerate                | 187<br>.00 | 888<br>.92 | 899.61   | 964.98   | 952.47   | 841.23   | 822.07   | 986.73   | 906.17       | 652.16       | 902.29       | 1137.35      | 1035.86      | 885.65       |
| M146T<br>678 | (M+H)+             | 4-Guanidinobutyric acid              | 146<br>.09 | 677<br>.95 | 2001.12  | 1448.93  | 1682.70  | 1998.69  | 1602.20  | 1479.93  | 2016.30      | 2124.31      | 1628.46      | 1812.58      | 2177.90      | 1906.33      |
| M252T<br>262 | (M+H)+             | 5'-Deoxyadenosine                    | 252<br>.11 | 261<br>.59 | 1212.45  | 1541.43  | 1644.14  | 844.57   | 967.76   | 953.90   | 1143.90      | 1150.22      | 1120.49      | 3289.42      | 3362.73      | 2900.81      |
| M810T<br>820 | (M+H)+             | Acetyl coenzyme A (Acetyl-CoA)       | 810<br>.13 | 820<br>.01 | 1525.17  | 1153.85  | 1292.55  | 1319.97  | 1601.46  | 1338.92  | 867.89       | 874.74       | 848.95       | 1376.59      | 1046.84      | 1048.33      |
| M204T<br>580 | (M+H)+             | Acetylcarnitine                      | 204<br>.12 | 579<br>.87 | 2583.15  | 3066.09  | 3083.45  | 3079.57  | 3087.20  | 3251.36  | 2425.73      | 2209.13      | 2429.61      | 6243.99      | 6433.51      | 5875.09      |
| M146T<br>718 | (M+H)+             | Acetylcholine                        | 146<br>.12 | 718<br>.45 | 50676.99 | 48951.19 | 48209.91 | 45100.33 | 42956.15 | 53847.70 | 48678.9<br>2 | 37089.2<br>6 | 39759.2<br>1 | 77990.2<br>3 | 86164.8<br>6 | 73337.7<br>9 |
| M136T<br>294 | (M+H)+             | Adenine                              | 136<br>.06 | 293<br>.62 | 71680.65 | 48252.42 | 48454.47 | 51013.89 | 28291.58 | 35902.04 | 36562.0<br>4 | 18336.0<br>6 | 17876.6<br>0 | 78069.6<br>5 | 85006.6<br>2 | 69767.8<br>5 |
| M268T<br>315 | (M+H)+             | Adenosine                            | 268<br>.10 | 314<br>.84 | 34664.66 | 41175.29 | 33538.94 | 31712.79 | 27937.99 | 38811.88 | 51578.7<br>8 | 36187.9<br>2 | 44867.7<br>3 | 62373.2<br>0 | 70994.3<br>0 | 54329.8<br>5 |
| M428T<br>967 | (M+H)+             | Adenosine 5'-diphosphate (ADP)       | 428<br>.04 | 967<br>.50 | 19373.30 | 6039.48  | 3539.80  | 4432.99  | 2693.80  | 4317.75  | 25579.7<br>8 | 3683.76      | 4142.40      | 4008.61      | 4928.45      | 3139.24      |
| M450T<br>888 | (M+Na)+            | Adenosine 5'-phosphosulfate<br>(APS) | 450<br>.02 | 888<br>.43 | 2125.11  | 2246.42  | 1997.71  | 1521.84  | 1400.49  | 1778.04  | 1639.05      | 1746.19      | 2045.31      | 2130.35      | 2660.58      | 1986.16      |

|                |                 |                                      |            |            |               |               |               |           |           |           |               |               |               |               |               |               |
|----------------|-----------------|--------------------------------------|------------|------------|---------------|---------------|---------------|-----------|-----------|-----------|---------------|---------------|---------------|---------------|---------------|---------------|
| M508T<br>940   | (M+H)+          | Adenosine 5'-triphosphate (ATP)      | 508<br>.00 | 939<br>.72 | 217354.7<br>2 | 274574.8<br>4 | 199507.4<br>6 | 247113.38 | 238891.40 | 284193.13 | 251135.<br>93 | 249917.<br>82 | 236926.<br>97 | 287446.<br>38 | 281795.<br>33 | 260616.<br>46 |
| M348T<br>765   | (M+H)+          | Adenosine monophosphate (AMP)        | 348<br>.07 | 764<br>.79 | 811.44        | 848.88        | 918.78        | 1412.90   | 783.89    | 1607.31   | 975.58        | 681.99        | 951.24        | 1405.19       | 2042.41       | 2018.19       |
| M560T<br>815   | (M+H)+          | ADP-ribose                           | 560<br>.08 | 815<br>.49 | 662.48        | 757.69        | 670.08        | 744.86    | 770.51    | 773.45    | 641.66        | 742.13        | 797.51        | 739.57        | 834.70        | 748.21        |
| M243T<br>69    | (M+H-<br>2H2O)+ | all cis-(6,9,12)-Linolenic acid      | 243<br>.21 | 68.<br>62  | 19828.33      | 25999.58      | 14901.40      | 14861.91  | 14704.31  | 23443.53  | 19852.7<br>3  | 17093.4<br>9  | 17897.2<br>5  | 15054.5<br>2  | 13685.7<br>6  | 13927.3<br>0  |
| M269T<br>415   | (M+H)+          | Allopurinol riboside                 | 269<br>.09 | 415<br>.33 | 4064.05       | 1614.55       | 1929.21       | 4201.77   | 4143.08   | 4190.91   | 5939.55       | 6154.22       | 5880.80       | 4003.03       | 4463.85       | 4601.25       |
| M323T<br>973   | (M+H-<br>H2O)+  | Alpha-D-Glucose 1,6-<br>bisphosphate | 322<br>.99 | 972<br>.72 | 3005.69       | 3608.95       | 3031.40       | 4393.60   | 3687.49   | 3882.02   | 3573.47       | 2851.18       | 3038.71       | 4845.43       | 4712.83       | 3473.81       |
| M243T<br>915   | (M+H-<br>H2O)+  | alpha-D-Glucose 1-phosphate          | 243<br>.03 | 914<br>.56 | 3925.01       | 4871.23       | 4030.52       | 4497.47   | 3716.03   | 5000.37   | 5369.05       | 4559.61       | 5989.56       | 4448.26       | 5742.71       | 4874.53       |
| M114T<br>80    | (M+H-<br>H2O)+  | Aminocaproic acid                    | 114<br>.09 | 79.<br>79  | 21003.86      | 15587.04      | 31864.03      | 16358.07  | 18693.53  | 40896.83  | 14312.7<br>0  | 26084.4<br>5  | 16504.1<br>6  | 18118.7<br>4  | 32528.1<br>8  | 31117.82      |
| M90T6<br>96    | (M+H)+          | Beta-Alanine                         | 90.<br>05  | 696<br>.31 | 1195.34       | 2517.32       | 1226.49       | 1447.38   | 1360.90   | 1423.75   | 3142.83       | 1377.33       | 1844.27       | 2021.76       | 2269.05       | 3350.27       |
| M118T<br>515   | (M+H)+          | Betaine                              | 118<br>.09 | 514<br>.69 | 110534.0<br>0 | 46460.58      | 42083.87      | 55322.60  | 49825.15  | 107624.40 | 107965.<br>39 | 60380.2<br>7  | 105945.<br>07 | 53887.2<br>4  | 65476.4<br>6  | 59092.5<br>2  |
| M104T<br>507_2 | M+              | Choline                              | 104<br>.11 | 507<br>.06 | 98092.43      | 64599.97      | 68164.62      | 111143.84 | 85593.99  | 94277.53  | 102686.<br>77 | 113341.<br>49 | 106195.<br>39 | 189778.<br>23 | 161735.<br>42 | 185704.<br>65 |
| M210T<br>915   | (M+NH4)+        | Citrate                              | 210<br>.06 | 915<br>.17 | 1305.44       | 288.51        | 1349.96       | 1730.91   | 1459.92   | 1557.70   | 3363.01       | 1415.68       | 564.74        | 2763.24       | 3614.32       | 4723.25       |
| M132T<br>679   | (M+H)+          | Creatine                             | 132<br>.08 | 678<br>.85 | 6289.17       | 6526.94       | 4363.35       | 6189.62   | 5224.33   | 6168.92   | 8048.24       | 13173.2<br>5  | 14002.3<br>3  | 8549.60       | 9805.23       | 9385.63       |
| M114T<br>312   | (M+H)+          | Creatinine                           | 114<br>.07 | 311<br>.70 | 3705.25       | 7611.79       | 4527.30       | 4007.05   | 5126.84   | 4994.25   | 3864.38       | 4842.01       | 5455.47       | 6699.32       | 4319.41       | 5714.08       |
| M100T<br>414   | (M+H)+          | Cyclohexylamine                      | 100<br>.11 | 413<br>.91 | 1705.33       | 1418.37       | 1541.02       | 2116.00   | 2269.51   | 1644.62   | 2435.44       | 2278.67       | 2103.32       | 2836.81       | 2513.55       | 3051.16       |
| M244T<br>455   | (M+H)+          | Cytidine                             | 244<br>.09 | 454<br>.87 | 7625.78       | 8262.71       | 6876.35       | 7411.32   | 6690.78   | 8217.98   | 9732.58       | 8049.39       | 8814.27       | 4435.81       | 5221.27       | 4034.54       |



|              |                  |                                                    |            |            |          |          |          |          |          |          |              |              |              |              |              |              |
|--------------|------------------|----------------------------------------------------|------------|------------|----------|----------|----------|----------|----------|----------|--------------|--------------|--------------|--------------|--------------|--------------|
| M404T<br>934 | (M+H)+           | Cytidine 5'-diphosphate (CDP)                      | 404<br>.02 | 934<br>.27 | 4282.59  | 4184.40  | 4220.31  | 4193.92  | 4502.03  | 6841.46  | 4777.63      | 5318.81      | 4338.47      | 5100.32      | 5980.46      | 5616.70      |
| M489T<br>854 | (M+H)+           | Cytidine 5'-diphosphocholine<br>(CDP-choline)      | 489<br>.11 | 854<br>.24 | 674.58   | 838.30   | 773.98   | 671.26   | 680.98   | 758.85   | 736.03       | 658.97       | 719.94       | 980.30       | 1098.87      | 976.96       |
| M615T<br>855 | (M+H)+           | Cytidine monophosphate N-<br>acetylneuraminic acid | 615<br>.15 | 854<br>.53 | 3879.55  | 4006.06  | 4184.56  | 4435.16  | 4286.64  | 4567.34  | 5190.02      | 4351.73      | 4719.29      | 5679.09      | 6368.54      | 5664.05      |
| M484T<br>971 | (M+H)+           | Cytidine triphosphate (CTP)                        | 483<br>.99 | 971<br>.08 | 23580.79 | 26837.84 | 21175.32 | 27248.72 | 24042.19 | 27580.18 | 26911.1<br>5 | 21743.4<br>7 | 22521.4<br>1 | 26072.7<br>3 | 30375.5<br>9 | 21760.9<br>2 |
| M201T<br>763 | (M+H)+           | D-Erythrose 4-phosphate                            | 201<br>.02 | 763<br>.49 | 1730.80  | 1993.47  | 2446.71  | 3486.77  | 2591.21  | 4128.25  | 1823.01      | 1622.13      | 1527.15      | 3357.76      | 4928.27      | 3982.57      |
| M341T<br>974 | (M+H)+           | D-Fructose 1,6-bisphosphate                        | 341<br>.00 | 974<br>.19 | 5427.84  | 6500.61  | 7170.57  | 7407.15  | 6265.74  | 7371.37  | 7781.15      | 6778.99      | 6038.19      | 8372.68      | 8532.62      | 6987.03      |
| M278T<br>880 | (M+NH4)+         | D-Glucose 6-phosphate                              | 278<br>.06 | 879<br>.70 | 843.40   | 887.30   | 1130.86  | 1025.54  | 876.36   | 1247.74  | 1109.25      | 1705.67      | 1026.62      | 957.68       | 913.92       | 793.32       |
| M70T5<br>99  | (M+H-<br>2H2O)+  | Diethanolamine                                     | 70.<br>06  | 599<br>.03 | 34204.99 | 38074.92 | 35386.94 | 37249.63 | 35342.77 | 43212.99 | 36083.8<br>4 | 30552.1<br>9 | 30922.4<br>0 | 34648.9<br>7 | 41247.2<br>9 | 34212.2<br>3 |
| M162T<br>787 | (M+H)+           | DL-2-Aminoadipic acid                              | 162<br>.08 | 787<br>.05 | 641.46   | 621.85   | 687.09   | 592.56   | 620.90   | 1069.64  | 1253.33      | 981.10       | 795.53       | 1028.30      | 1152.04      | 1076.10      |
| M131T<br>488 | (M+H-<br>2H2O)+  | DL-3-Phenyllactic acid                             | 131<br>.05 | 488<br>.47 | 2884.54  | 3021.59  | 2638.66  | 2665.64  | 2461.86  | 2736.42  | 2933.01      | 2231.59      | 2617.59      | 3142.53      | 3176.70      | 2794.51      |
| M207T<br>426 | (M+CH3CN<br>+H)+ | DL-Phenylalanine                                   | 207<br>.11 | 425<br>.94 | 3941.15  | 3896.42  | 4195.81  | 5363.32  | 3841.25  | 3349.35  | 6888.67      | 7331.31      | 4985.91      | 10186.2<br>5 | 6142.63      | 7457.14      |
| M360T<br>769 | (M+NH4)+         | D-Maltose                                          | 360<br>.15 | 768<br>.84 | 1024.32  | 1099.14  | 1108.00  | 1381.13  | 1586.63  | 1992.91  | 1968.78      | 1813.93      | 1974.16      | 3108.54      | 2845.19      | 2628.80      |
| M198T<br>589 | (M+NH4)+         | D-Mannose                                          | 198<br>.10 | 588<br>.90 | 31273.07 | 32797.23 | 26474.58 | 27238.28 | 19061.30 | 67396.24 | 25269.2<br>2 | 23433.7<br>7 | 22906.3<br>0 | 25244.2<br>4 | 53651.4<br>3 | 15826.4<br>7 |
| M136T<br>570 | (M+H-<br>H2O)+   | Dopamine                                           | 136<br>.08 | 570<br>.38 | 5706.92  | 6918.51  | 7635.31  | 6392.96  | 6180.24  | 7926.73  | 6941.37      | 6488.77      | 6970.13      | 7555.38      | 7726.69      | 7783.95      |
| M116T<br>632 | (M+H)+           | D-Proline                                          | 116<br>.07 | 631<br>.74 | 43785.12 | 45839.76 | 54656.11 | 62508.78 | 42261.46 | 58466.77 | 42547.1<br>3 | 39738.0<br>7 | 27837.0<br>3 | 44759.6<br>3 | 38964.6<br>6 | 36291.0<br>3 |
| M338T<br>55  | (M+H)+           | Erucamide                                          | 338<br>.34 | 55.<br>29  | 57679.37 | 16729.27 | 59630.88 | 17065.20 | 20077.95 | 29587.73 | 12597.5<br>4 | 43926.9<br>3 | 52866.5<br>6 | 51398.3<br>0 | 77302.7<br>5 | 67431.2<br>8 |

|              |                |                                   |            |            |               |               |               |           |           |           |               |               |               |               |               |               |
|--------------|----------------|-----------------------------------|------------|------------|---------------|---------------|---------------|-----------|-----------|-----------|---------------|---------------|---------------|---------------|---------------|---------------|
| M786T<br>766 | (M+H)+         | Flavin adenine dinucleotide (FAD) | 786<br>.16 | 765<br>.92 | 1858.84       | 1821.69       | 1862.08       | 2268.40   | 1958.96   | 2556.21   | 2205.46       | 2098.21       | 2241.34       | 2709.57       | 3297.76       | 2948.49       |
| M457T<br>781 | (M+H)+         | Flavin mononucleotide (FMN)       | 457<br>.11 | 780<br>.96 | 1124.65       | 1372.05       | 1247.54       | 1301.88   | 1021.46   | 1299.09   | 1473.77       | 1142.72       | 1404.23       | 1766.15       | 2276.57       | 2018.89       |
| M442T<br>831 | (M+H)+         | Folate                            | 442<br>.15 | 830<br>.77 | 861.42        | 926.53        | 867.21        | 896.91    | 641.64    | 769.84    | 828.95        | 574.40        | 744.16        | 519.21        | 621.57        | 647.54        |
| M277T<br>890 | (M+H)+         | gamma-L-Glutamyl-L-glutamic acid  | 277<br>.10 | 890<br>.23 | 2296.74       | 2254.20       | 2362.44       | 2199.04   | 1908.05   | 2661.36   | 3378.67       | 2011.93       | 2451.70       | 3329.96       | 2981.50       | 2490.33       |
| M606T<br>911 | (M+H)+         | GDP-glucose                       | 606<br>.08 | 911<br>.25 | 1229.14       | 1386.37       | 1374.05       | 1479.98   | 1328.77   | 1650.62   | 1716.65       | 1357.63       | 1343.14       | 1540.43       | 2198.59       | 1712.39       |
| M590T<br>878 | (M+H)+         | GDP-L-Fucose                      | 590<br>.09 | 878<br>.49 | 1290.37       | 1532.00       | 1415.23       | 1430.52   | 1383.98   | 1672.12   | 1390.12       | 1267.20       | 1583.12       | 1364.94       | 1753.35       | 1525.45       |
| M308T<br>823 | (M+H)+         | Glutathione                       | 308<br>.09 | 823<br>.43 | 16351.46      | 26704.94      | 26537.81      | 33429.67  | 29520.36  | 42541.62  | 75168.6<br>7  | 36271.7<br>2  | 30158.3<br>7  | 11116.28      | 21123.7<br>0  | 32485.3<br>4  |
| M613T<br>964 | (M+H)+         | Glutathione disulfide             | 613<br>.16 | 964<br>.23 | 190552.7<br>4 | 169335.1<br>8 | 163074.9<br>6 | 122300.58 | 185961.87 | 161289.09 | 142965.<br>74 | 140023.<br>52 | 175341.<br>53 | 269109.<br>46 | 222608.<br>09 | 135578.<br>99 |
| M341T<br>57  | (M+H-<br>H2O)+ | Glycerol 1-octadecanoate          | 341<br>.30 | 56.<br>57  | 39762.35      | 9109.01       | 17933.87      | 9447.60   | 29552.50  | 16956.28  | 9823.13       | 24155.3<br>1  | 12841.9<br>2  | 11453.6<br>0  | 19409.9<br>5  | 13995.4<br>6  |
| M173T<br>835 | (M+H)+         | Glycerol 3-phosphate              | 173<br>.02 | 834<br>.67 | 4839.75       | 6119.96       | 5269.35       | 8279.17   | 7403.29   | 9527.31   | 3176.82       | 2605.29       | 2748.74       | 1829.09       | 2956.25       | 2673.97       |
| M258T<br>743 | M+             | Glycerophosphocholine             | 258<br>.11 | 742<br>.60 | 38152.16      | 39421.92      | 35744.13      | 38775.25  | 38031.76  | 40302.71  | 47270.2<br>6  | 42189.0<br>2  | 37685.0<br>1  | 81030.3<br>3  | 84139.4<br>0  | 80976.4<br>1  |
| M231T<br>599 | M+             | Glycyl-Arginine                   | 231<br>.13 | 599<br>.04 | 1759.92       | 2302.48       | 1832.10       | 1978.78   | 1555.92   | 2699.84   | 1648.70       | 1079.55       | 1655.09       | 1496.25       | 2322.03       | 1356.43       |
| M191T<br>828 | (M+H)+         | Glycyl-Aspartate                  | 191<br>.07 | 828<br>.29 | 1336.37       | 1421.12       | 1291.82       | 1327.39   | 1298.13   | 1441.84   | 1533.96       | 1336.56       | 1290.73       | 1992.95       | 1887.48       | 1591.03       |
| M204T<br>684 | (M+H)+         | Glycyl-Glutamine                  | 204<br>.10 | 683<br>.58 | 2345.62       | 1579.07       | 823.19        | 789.21    | 2345.58   | 767.81    | 346.49        | 1171.73       | 1150.70       | 820.24        | 740.51        | 264.06        |
| M284T<br>494 | (M+H)+         | Guanosine                         | 284<br>.10 | 494<br>.47 | 3107.64       | 2614.84       | 3071.72       | 2599.65   | 2680.00   | 3907.27   | 4785.69       | 3494.86       | 4011.72       | 2605.86       | 3363.11       | 2803.56       |
| M444T<br>878 | (M+H)+         | Guanosine 5'-diphosphate (GDP)    | 444<br>.03 | 878<br>.40 | 810.71        | 952.26        | 867.33        | 823.94    | 855.00    | 948.15    | 953.16        | 824.78        | 994.89        | 836.34        | 1083.80       | 954.39        |

|                |                 |                                 |            |            |               |               |               |           |           |           |               |               |               |               |               |               |
|----------------|-----------------|---------------------------------|------------|------------|---------------|---------------|---------------|-----------|-----------|-----------|---------------|---------------|---------------|---------------|---------------|---------------|
| M524T<br>976   | (M+H)+          | Guanosine 5'-triphosphate (GTP) | 524<br>.00 | 976<br>.32 | 23876.61      | 26490.03      | 23820.65      | 24170.02  | 22540.63  | 29340.86  | 29536.0<br>7  | 29319.9<br>5  | 27652.4<br>2  | 30638.2<br>3  | 33970.7<br>1  | 24521.7<br>8  |
| M137T<br>413   | (M+H)+          | Hypoxanthine                    | 137<br>.04 | 412<br>.90 | 4147.00       | 4445.88       | 5653.91       | 6173.15   | 5614.08   | 4131.80   | 6615.69       | 8112.55       | 8523.89       | 7059.09       | 6190.77       | 6373.25       |
| M69T1<br>11    | (M+H)+          | Imidazole                       | 69.<br>04  | 111.<br>25 | 3669.86       | 2045.24       | 1515.87       | 2023.12   | 2202.58   | 762.07    | 3552.24       | 1491.11       | 1412.54       | 2034.03       | 2629.79       | 1934.35       |
| M98T1<br>33    | (M+H-<br>2H2O)+ | Iminodiacetic acid              | 98.<br>02  | 133<br>.07 | 1267.67       | 1740.43       | 1275.59       | 1373.35   | 1244.90   | 1359.55   | 2436.56       | 1784.69       | 1380.50       | 2699.82       | 3545.97       | 2707.25       |
| M188T<br>485   | (M+H-<br>H2O)+  | Indolelactic acid               | 188<br>.07 | 485<br>.42 | 31919.90      | 35131.65      | 34310.20      | 36398.95  | 27951.82  | 36177.44  | 37989.8<br>0  | 35662.7<br>1  | 28562.1<br>5  | 35211.8<br>3  | 38843.2<br>6  | 37264.5<br>6  |
| M203T<br>75    | (M+H)+          | Isoleucyl-Alanine               | 203<br>.14 | 75.<br>43  | 3557.22       | 3482.15       | 3299.87       | 3946.68   | 2417.32   | 3970.90   | 4427.06       | 3658.03       | 3632.91       | 4864.54       | 4911.67       | 5054.47       |
| M133T<br>725   | (M+H)+          | L-Asparagine                    | 133<br>.06 | 724<br>.89 | 5373.11       | 4469.11       | 5864.96       | 6318.58   | 7251.83   | 4936.30   | 7781.17       | 5466.02       | 5811.67       | 6252.05       | 3915.65       | 7520.57       |
| M134T<br>776   | (M+H)+          | L-Aspartate                     | 134<br>.04 | 776<br>.24 | 26063.31      | 27479.13      | 24816.72      | 23129.05  | 22324.87  | 27675.14  | 43394.9<br>5  | 35587.1<br>1  | 41171.4<br>9  | 53342.2<br>4  | 60099.0<br>3  | 50574.5<br>4  |
| M162T<br>676   | (M+H)+          | L-Carnitine                     | 162<br>.11 | 675<br>.88 | 26528.44      | 21497.62      | 23046.40      | 29351.12  | 26638.28  | 23757.87  | 21088.4<br>2  | 24113.4<br>6  | 21239.1<br>8  | 49665.5<br>4  | 54878.4<br>7  | 55794.5<br>6  |
| M176T<br>750   | (M+H)+          | L-Citrulline                    | 176<br>.10 | 750<br>.17 | 10581.09      | 9263.85       | 10257.72      | 6374.17   | 5928.19   | 6502.45   | 10013.6<br>9  | 6982.59       | 11850.0<br>3  | 12120.5<br>9  | 13057.4<br>9  | 12407.3<br>7  |
| M170T<br>704   | (M+H)+          | L-Cysteic acid                  | 170<br>.01 | 703<br>.55 | 1501.82       | 1102.41       | 1218.33       | 1411.38   | 1359.63   | 1468.56   | 1100.01       | 1360.51       | 1304.10       | 805.86        | 1123.55       | 1251.50       |
| M148T<br>765_2 | (M+H)+          | L-Glutamate                     | 148<br>.06 | 764<br>.91 | 349222.9<br>4 | 394227.5<br>1 | 351536.7<br>5 | 372380.09 | 340065.98 | 403245.55 | 398340.<br>90 | 348643.<br>65 | 402357.<br>27 | 453391.<br>04 | 472112.<br>97 | 445782.<br>35 |
| M147T<br>714   | (M+H)+          | L-Glutamine                     | 147<br>.08 | 713<br>.92 | 395714.3<br>5 | 377521.9<br>6 | 400717.2<br>0 | 377860.19 | 352596.17 | 455331.28 | 410425.<br>78 | 400006.<br>92 | 339215.<br>33 | 464912.<br>83 | 453822.<br>80 | 420486.<br>14 |
| M196T<br>199   | (M+NH4)+        | L-Gulonic gamma-lactone         | 196<br>.08 | 198<br>.80 | 81557.48      | 94687.63      | 36879.23      | 18289.18  | 56489.80  | 62713.97  | 43976.6<br>4  | 29388.1<br>7  | 47154.9<br>4  | 38170.0<br>1  | 35509.9<br>1  | 37164.1<br>8  |
| M156T<br>839   | (M+H)+          | L-Histidine                     | 156<br>.08 | 838<br>.66 | 2944.09       | 2755.07       | 5137.78       | 2484.87   | 2469.72   | 4860.30   | 2879.54       | 2824.22       | 3300.92       | 3106.62       | 976.45        | 3174.24       |
| M132T<br>522   | (M+H)+          | L-Isoleucine                    | 132<br>.10 | 522<br>.26 | 207551.7<br>2 | 185534.4<br>8 | 185514.9<br>1 | 215094.89 | 189087.48 | 191836.97 | 250287.<br>07 | 169329.<br>92 | 195803.<br>35 | 211319.<br>63 | 218257.<br>83 | 209435.<br>24 |

|                |                  |                     |            |            |               |               |               |           |           |           |               |               |               |               |               |               |
|----------------|------------------|---------------------|------------|------------|---------------|---------------|---------------|-----------|-----------|-----------|---------------|---------------|---------------|---------------|---------------|---------------|
| M132T<br>501   | (M+H)+           | L-Leucine           | 132<br>.10 | 501<br>.40 | 187523.4<br>6 | 194799.6<br>9 | 176353.0<br>7 | 165571.43 | 150539.81 | 189690.29 | 204257.<br>09 | 168850.<br>28 | 170958.<br>01 | 180832.<br>49 | 193117.<br>40 | 173880.<br>13 |
| M150T<br>549   | (M+H)+           | L-Methionine        | 150<br>.06 | 549<br>.16 | 25526.30      | 26812.62      | 25388.45      | 21569.49  | 18739.84  | 24329.02  | 26833.5<br>7  | 18203.1<br>0  | 18992.1<br>9  | 33265.9<br>1  | 27083.4<br>9  | 35058.6<br>4  |
| M176T<br>522   | (M-<br>H+2Na)+   | L-Norleucine        | 176<br>.07 | 521<br>.52 | 2267.72       | 1710.86       | 2043.38       | 2729.19   | 1557.69   | 1856.67   | 3598.70       | 2317.84       | 2512.40       | 2496.76       | 3668.31       | 4553.39       |
| M166T<br>488_2 | (M+H)+           | L-Phenylalanine     | 166<br>.09 | 488<br>.00 | 202646.9<br>6 | 220910.0<br>7 | 200682.3<br>2 | 200915.66 | 186052.85 | 225040.94 | 233326.<br>60 | 192492.<br>17 | 187747.<br>57 | 223735.<br>08 | 240257.<br>24 | 218751.<br>42 |
| M157T<br>618   | (M+CH3CN<br>+H)+ | L-Proline           | 157<br>.10 | 618<br>.05 | 9670.16       | 9238.17       | 9193.33       | 9589.63   | 7245.20   | 11008.92  | 11370.7<br>9  | 11044.3<br>2  | 8925.84       | 19964.9<br>3  | 13089.5<br>8  | 13081.7<br>9  |
| M147T<br>836   | (M+NH4)+         | L-Pyroglutamic acid | 147<br>.08 | 836<br>.26 | 10068.20      | 5113.45       | 4211.74       | 5706.35   | 9117.81   | 5163.91   | 5525.02       | 4328.57       | 4103.59       | 4901.31       | 4378.81       | 5601.49       |
| M106T<br>757   | (M+H)+           | L-Serine            | 106<br>.05 | 756<br>.77 | 2792.83       | 2835.81       | 2179.42       | 2491.54   | 3318.91   | 1345.57   | 1730.32       | 2166.66       | 3234.41       | 2435.65       | 3308.82       | 2876.04       |
| M189T<br>513   | (M+H)+           | L-Targinine         | 189<br>.13 | 513<br>.14 | 4026.33       | 2935.77       | 3794.94       | 3960.28   | 3138.89   | 4187.41   | 3198.22       | 3375.61       | 3217.57       | 4412.21       | 5705.96       | 3165.03       |
| M120T<br>684   | (M+H)+           | L-Threonine         | 120<br>.06 | 684<br>.31 | 26368.42      | 37017.21      | 25934.79      | 27317.69  | 24051.50  | 28467.57  | 30477.4<br>3  | 37465.8<br>5  | 28288.8<br>4  | 31516.6<br>2  | 35064.9<br>7  | 34332.1<br>4  |
| M227T<br>484   | (M+Na)+          | L-Tryptophan        | 227<br>.08 | 484<br>.12 | 4036.60       | 3548.62       | 3247.72       | 4064.33   | 3055.57   | 3332.48   | 4514.56       | 3796.07       | 4121.15       | 3301.64       | 3944.34       | 3834.97       |
| M182T<br>630   | (M+H)+           | L-Tyrosine          | 182<br>.08 | 629<br>.61 | 3484.45       | 1987.75       | 1778.97       | 2604.24   | 2262.05   | 2635.62   | 1959.21       | 7287.74       | 2272.29       | 2159.07       | 2602.55       | 8315.06       |
| M243T<br>82_1  | (M+H)+           | Lumichrome          | 243<br>.09 | 82.<br>37  | 7514.44       | 7395.21       | 5348.89       | 6329.18   | 5804.44   | 8128.73   | 3782.90       | 4138.56       | 4811.49       | 6994.69       | 9891.28       | 6960.88       |
| M159T<br>502_2 | (M+CH3CN<br>+H)+ | L-Valine            | 159<br>.11 | 501<br>.70 | 1915.09       | 2328.43       | 2312.52       | 2003.48   | 1728.52   | 1987.40   | 2955.33       | 2709.37       | 2757.91       | 3965.89       | 2415.32       | 2685.12       |
| M468T<br>357   | (M+H)+           | LysoPC(14:0)        | 468<br>.31 | 357<br>.23 | 26734.39      | 36513.77      | 37816.17      | 18865.09  | 15884.05  | 20631.75  | 19418.5<br>0  | 36810.3<br>5  | 17918.3<br>3  | 14223.0<br>9  | 31351.7<br>6  | 29644.5<br>8  |
| M496T<br>333_4 | (M+H)+           | LysoPC(16:0)        | 496<br>.34 | 332<br>.57 | 23084.19      | 21016.27      | 24341.87      | 25496.66  | 25299.44  | 19903.66  | 20110.5<br>0  | 29229.6<br>2  | 24682.6<br>3  | 25884.3<br>1  | 23833.8<br>0  | 23555.5<br>8  |
| M523T<br>347   | M+               | LysoPC(18:0)        | 523<br>.36 | 347<br>.33 | 46001.21      | 12740.56      | 11348.09      | 29869.93  | 29723.08  | 32416.22  | 11604.7<br>7  | 13206.6<br>2  | 12387.7<br>7  | 12459.4<br>1  | 13264.0<br>0  | 32761.9<br>7  |

|               |                |                                                       |            |            |               |               |               |           |           |           |               |               |               |               |               |               |
|---------------|----------------|-------------------------------------------------------|------------|------------|---------------|---------------|---------------|-----------|-----------|-----------|---------------|---------------|---------------|---------------|---------------|---------------|
| M522T<br>344  | (M+H)+         | LysoPC(18:1(9Z))                                      | 522<br>.35 | 344<br>.02 | 184298.0<br>9 | 88788.05      | 91856.32      | 88773.68  | 88471.81  | 96529.23  | 97968.9<br>0  | 111728.<br>55 | 103743.<br>87 | 97663.9<br>3  | 97933.7<br>3  | 95027.5<br>9  |
| M134T<br>208  | (M+H)+         | Mandelonitrile                                        | 134<br>.06 | 207<br>.78 | 21530.22      | 21988.44      | 21755.51      | 22089.22  | 18820.91  | 25169.78  | 25555.5<br>3  | 23092.7<br>3  | 20736.2<br>4  | 22185.6<br>5  | 17563.8<br>9  | 23690.9<br>5  |
| M303T<br>59_1 | (M+H)+         | MG(14:0)                                              | 303<br>.25 | 58.<br>90  | 9656.01       | 19948.48      | 14851.98      | 24381.82  | 16018.07  | 14976.02  | 18766.7<br>6  | 13679.4<br>4  | 11383.9<br>8  | 19793.1<br>6  | 12150.2<br>8  | 15079.2<br>8  |
| M331T<br>58_2 | (M+H)+         | MG(16:0)                                              | 331<br>.28 | 57.<br>72  | 279429.1<br>1 | 176470.7<br>0 | 187457.7<br>8 | 151208.74 | 268859.23 | 200378.40 | 129611.<br>98 | 168059.<br>50 | 182309.<br>59 | 232357.<br>58 | 210251.<br>95 | 188793.<br>92 |
| M198T<br>758  | (M+NH4)+       | myo-Inositol                                          | 198<br>.10 | 758<br>.39 | 55104.21      | 55362.41      | 56394.33      | 64988.67  | 60586.24  | 67994.38  | 69030.1<br>9  | 60242.7<br>7  | 56709.5<br>4  | 81352.7<br>5  | 87757.4<br>3  | 71969.5<br>7  |
| M189T<br>606  | (M+H)+         | N-Acetylglutamine                                     | 189<br>.09 | 605<br>.54 | 1865.95       | 1773.84       | 1616.80       | 1633.87   | 1668.00   | 1829.16   | 1759.44       | 1604.65       | 1617.46       | 1895.46       | 2123.93       | 1918.51       |
| M192T<br>399  | (M+H)+         | N-Acetyl-L-methionine                                 | 192<br>.07 | 398<br>.64 | 533.54        | 352.75        | 640.37        | 589.07    | 336.32    | 616.87    | 501.76        | 595.58        | 507.46        | 815.06        | 752.43        | 839.22        |
| M131T<br>629  | (M+H)+         | N-Acetylputrescine                                    | 131<br>.12 | 629<br>.45 | 1881.27       | 1383.32       | 1742.43       | 2270.80   | 3460.13   | 2043.33   | 2284.01       | 2224.56       | 3509.03       | 2509.62       | 1236.49       | 3738.75       |
| M219T<br>68   | (M+H)+         | N-Acetylserotonin                                     | 219<br>.11 | 68.<br>28  | 16584.74      | 12416.76      | 11823.45      | 13249.82  | 8961.75   | 11070.27  | 12202.2<br>3  | 10697.6<br>4  | 10362.2<br>2  | 14063.6<br>4  | 18701.7<br>9  | 14266.6<br>0  |
| M192T<br>211  | (M+H-<br>H2O)+ | N-Benzoyloxycarbonylglycine                           | 192<br>.06 | 211<br>.23 | 405.37        | 4286.63       | 1621.45       | 4088.10   | 1943.61   | 2526.45   | 2812.31       | 3366.15       | 3693.08       | 1221.50       | 2624.25       | 5438.62       |
| M123T<br>115  | (M+H)+         | Nicotinamide                                          | 123<br>.05 | 114<br>.52 | 46979.48      | 36107.10      | 30467.09      | 24309.71  | 28847.18  | 27526.35  | 21204.8<br>2  | 21614.6<br>9  | 22583.8<br>8  | 22388.1<br>1  | 24961.1<br>2  | 21323.0<br>1  |
| M664T<br>920  | (M+H)+         | Nicotinamide adenine dinucleotide<br>(NAD)            | 664<br>.12 | 920<br>.17 | 1197.71       | 1728.64       | 1807.66       | 2105.84   | 2114.38   | 1948.44   | 1748.55       | 1117.72       | 2109.17       | 2462.75       | 1903.89       | 4348.83       |
| M744T<br>957  | (M+H)+         | Nicotinamide adenine dinucleotide<br>phosphate (NADP) | 744<br>.08 | 956<br>.96 | 5304.76       | 5987.91       | 5105.43       | 5488.82   | 5655.88   | 6683.78   | 6570.95       | 5565.92       | 6462.92       | 7926.18       | 8190.75       | 6098.93       |
| M124T<br>418  | (M+H)+         | Nicotinate                                            | 124<br>.04 | 417<br>.52 | 19536.66      | 11286.43      | 12609.50      | 20251.68  | 19382.13  | 14524.00  | 23996.7<br>2  | 29705.8<br>8  | 27795.7<br>4  | 27918.4<br>2  | 27904.6<br>5  | 26652.4<br>7  |
| M326T<br>60   | (M+H)+         | N-Oleoylethanolamine                                  | 326<br>.30 | 59.<br>51  | 5063.33       | 5256.67       | 5980.96       | 5238.01   | 6554.76   | 5122.76   | 6385.22       | 8436.20       | 7653.21       | 7723.93       | 10658.8<br>6  | 10612.0<br>7  |
| M340T<br>81   | (M+H)+         | Oleoyl glycine                                        | 340<br>.28 | 81.<br>14  | 16034.90      | 13318.48      | 11811.86      | 10720.96  | 9978.47   | 11574.27  | 12283.4<br>8  | 12994.7<br>4  | 10828.7<br>7  | 25602.9<br>7  | 29693.6<br>1  | 30053.8<br>7  |

|                |                    |                                                     |            |            |               |               |               |           |           |           |               |               |               |               |               |               |
|----------------|--------------------|-----------------------------------------------------|------------|------------|---------------|---------------|---------------|-----------|-----------|-----------|---------------|---------------|---------------|---------------|---------------|---------------|
| M220T<br>527   | (M+H)+             | Pantothenate                                        | 220<br>.12 | 527<br>.43 | 124364.6<br>2 | 65103.54      | 99208.68      | 154027.63 | 167508.32 | 86114.63  | 167586.<br>25 | 188925.<br>07 | 189380.<br>20 | 205580.<br>74 | 187860.<br>53 | 212417.<br>60 |
| M717T<br>266   | (M+H-<br>H2O)+     | PC(16:0/16:0)                                       | 716<br>.56 | 266<br>.25 | 7201.15       | 947.77        | 1847.88       | 600.04    | 1380.34   | 887.35    | 755.81        | 744.89        | 1472.13       | 721.92        | 981.42        | 1264.72       |
| M787T<br>150   | (M+H)+             | PC(18:1(9Z)/18:1(9Z))                               | 786<br>.60 | 149<br>.64 | 68549.59      | 5815.48       | 32665.88      | 3887.75   | 12461.12  | 2228.07   | 3202.92       | 6219.96       | 5375.00       | 14361.4<br>1  | 14816.6<br>1  | 10141.8<br>3  |
| M212T<br>851   | (M+H)+             | Phosphocreatine                                     | 212<br>.04 | 851<br>.27 | 70491.74      | 78519.54      | 79389.35      | 78534.06  | 74964.54  | 90348.06  | 103700.<br>94 | 92480.8<br>7  | 98878.4<br>9  | 125894.<br>58 | 124143.<br>34 | 115299.<br>85 |
| M169T<br>885   | (M+H)+             | Phosphoenolpyruvate                                 | 168<br>.99 | 885<br>.48 | 839.26        | 843.38        | 868.56        | 859.22    | 782.50    | 947.74    | 795.68        | 910.21        | 954.75        | 1402.29       | 2011.96       | 1252.66       |
| M184T<br>921   | (M+H)+             | Phosphorylcholine                                   | 184<br>.07 | 921<br>.16 | 475559.7<br>7 | 512088.0<br>3 | 468740.9<br>3 | 573924.38 | 502579.54 | 610365.63 | 527557.<br>43 | 518514.<br>69 | 527643.<br>52 | 490903.<br>14 | 512154.<br>80 | 457884.<br>00 |
| M124T<br>623   | (M+H)+             | Picolinic acid                                      | 124<br>.04 | 622<br>.90 | 1029.39       | 1641.63       | 1652.47       | 1709.16   | 1281.24   | 1328.27   | 1560.51       | 1670.35       | 1611.48       | 1999.02       | 1919.07       | 1696.97       |
| M245T<br>801   | (M+H)+             | Prolyl-Glutamate                                    | 245<br>.11 | 801<br>.40 | 885.28        | 922.99        | 791.59        | 979.90    | 820.42    | 1223.62   | 1148.67       | 1004.59       | 902.00        | 1534.11       | 1440.84       | 1328.34       |
| M263T<br>874   | (M+CH3CO<br>O+2H)+ | Prolyl-Serine                                       | 263<br>.12 | 873<br>.63 | 1647.50       | 2584.92       | 2278.85       | 2197.38   | 2278.36   | 2915.64   | 2971.69       | 2386.30       | 2414.87       | 3796.22       | 2845.38       | 3193.72       |
| M170T<br>207_2 | (M+H)+             | Pyridoxine                                          | 170<br>.08 | 206<br>.90 | 567964.7<br>3 | 577336.3<br>7 | 545575.6<br>0 | 507324.46 | 429249.40 | 494316.07 | 534557.<br>77 | 431222.<br>91 | 437320.<br>47 | 583427.<br>48 | 480168.<br>50 | 561801.<br>65 |
| M666T<br>776   | (M+H)+             | Reduced nicotinamide adenine<br>dinucleotide (NADH) | 666<br>.13 | 776<br>.12 | 6384.44       | 8042.91       | 7697.22       | 9577.48   | 7109.86   | 8221.04   | 8223.76       | 5393.95       | 6006.98       | 5608.76       | 8228.34       | 9034.90       |
| M377T<br>399   | (M+H)+             | Riboflavin                                          | 377<br>.15 | 398<br>.81 | 1614.82       | 875.16        | 1359.09       | 1779.89   | 1650.73   | 1149.66   | 1854.91       | 2147.26       | 2025.53       | 2100.44       | 2280.52       | 2024.84       |
| M298T<br>144   | (M+H)+             | S-Methyl-5'-thioadenosine                           | 298<br>.10 | 144<br>.25 | 349664.8<br>0 | 422808.8<br>5 | 353893.0<br>9 | 425091.17 | 359275.47 | 394746.20 | 384424.<br>42 | 366818.<br>41 | 327139.<br>82 | 464682.<br>16 | 416429.<br>00 | 407785.<br>96 |
| M216T<br>756   | (M+H)+             | sn-Glycerol 3-<br>phosphoethanolamine               | 216<br>.06 | 755<br>.98 | 1810.43       | 1953.99       | 1929.89       | 1966.76   | 1781.67   | 2082.25   | 2064.65       | 2017.36       | 2161.88       | 4310.07       | 4175.07       | 4008.01       |
| M126T<br>565   | (M+H)+             | Taurine                                             | 126<br>.02 | 564<br>.65 | 47961.89      | 51868.58      | 49892.35      | 53743.15  | 51890.40  | 56363.43  | 63830.2<br>9  | 60170.3<br>2  | 59196.1<br>5  | 82263.3<br>1  | 89382.5<br>9  | 76330.6<br>0  |
| M265T<br>672   | M+                 | Thiamine                                            | 265<br>.11 | 672<br>.41 | 18314.34      | 16516.44      | 17011.32      | 20117.37  | 15290.08  | 16142.95  | 16557.2<br>3  | 19670.5<br>3  | 15188.4<br>4  | 19501.7<br>8  | 21932.9<br>9  | 22307.6<br>8  |

|              |                |                                                         |            |            |               |               |               |           |           |           |               |               |               |               |               |               |
|--------------|----------------|---------------------------------------------------------|------------|------------|---------------|---------------|---------------|-----------|-----------|-----------|---------------|---------------|---------------|---------------|---------------|---------------|
| M425T<br>977 | M+             | Thiamine pyrophosphate (TPP)                            | 425<br>.04 | 977<br>.41 | 3792.63       | 4272.44       | 3832.75       | 2743.04   | 666.19    | 4012.29   | 669.21        | 4217.76       | 4302.91       | 6605.69       | 6883.07       | 4400.47       |
| M165T<br>570 | (M+H)+         | trans-2-Hydroxycinnamic acid                            | 165<br>.05 | 569<br>.90 | 9791.65       | 11867.74      | 12058.68      | 10307.15  | 10167.36  | 13005.51  | 12717.0<br>4  | 11326.4<br>5  | 11558.0<br>8  | 12813.8<br>6  | 13941.2<br>6  | 12450.8<br>6  |
| M149T<br>488 | (M+H)+         | trans-cinnamate                                         | 149<br>.06 | 488<br>.42 | 4619.08       | 6174.39       | 5346.11       | 4675.20   | 5781.87   | 6270.03   | 5669.65       | 5120.57       | 5984.89       | 5902.66       | 6220.26       | 5909.88       |
| M150T<br>277 | (M+H)+         | Triethanolamine                                         | 150<br>.11 | 276<br>.55 | 4805.82       | 11536.15      | 8166.07       | 32179.68  | 60883.59  | 8972.42   | 12587.2<br>7  | 118338.<br>33 | 12918.8<br>7  | 6070.37       | 16777.4<br>6  | 6809.92       |
| M120T<br>488 | (M+H-<br>H2O)+ | Tyramine                                                | 120<br>.08 | 487<br>.98 | 109705.8<br>9 | 122529.8<br>6 | 106235.5<br>4 | 107415.11 | 100838.24 | 120836.90 | 121949.<br>36 | 104691.<br>90 | 103318.<br>89 | 127270.<br>17 | 134630.<br>61 | 120292.<br>58 |
| M567T<br>859 | (M+H)+         | UDP-D-Galactose                                         | 567<br>.06 | 858<br>.90 | 6431.44       | 9115.10       | 6848.89       | 8401.41   | 7798.47   | 8991.60   | 9829.66       | 8010.66       | 9289.52       | 10571.2<br>6  | 10578.6<br>0  | 9487.73       |
| M625T<br>836 | (M+NH4)+       | UDP-N-acetylglucosamine                                 | 625<br>.11 | 836<br>.39 | 26360.41      | 28355.55      | 28117.34      | 29100.85  | 26321.49  | 33156.02  | 34480.0<br>2  | 25809.4<br>0  | 31949.5<br>8  | 41342.3<br>2  | 45820.2<br>5  | 44289.7<br>0  |
| M113T<br>150 | (M+H)+         | Uracil                                                  | 113<br>.03 | 149<br>.84 | 6113.52       | 7186.84       | 6812.64       | 5020.35   | 4365.89   | 4844.46   | 2627.15       | 1055.95       | 4221.26       | 9713.34       | 10589.0<br>6  | 9639.30       |
| M61T1<br>83  | (M+H)+         | Urea                                                    | 61.<br>04  | 182<br>.89 | 2876.64       | 4664.71       | 3919.51       | 3531.76   | 3274.28   | 1631.21   | 4309.39       | 2477.72       | 2503.03       | 4891.16       | 2454.89       | 3615.04       |
| M245T<br>299 | (M+H)+         | Uridine                                                 | 245<br>.08 | 298<br>.56 | 3184.58       | 3611.12       | 3473.81       | 2696.26   | 2478.28   | 2943.33   | 3348.41       | 2984.75       | 3234.81       | 3832.96       | 4046.81       | 3079.29       |
| M405T<br>912 | (M+H)+         | Uridine 5'-diphosphate (UDP)                            | 405<br>.01 | 911<br>.51 | 4181.69       | 5868.22       | 5877.23       | 5147.74   | 4767.31   | 6818.11   | 6931.53       | 4556.90       | 5612.55       | 6552.85       | 7845.85       | 6838.71       |
| M581T<br>927 | (M+H)+         | Uridine 5'-diphosphoglucuronic acid (UDP-D-glucuronate) | 581<br>.04 | 927<br>.24 | 4973.23       | 6764.94       | 5972.91       | 5903.00   | 5193.42   | 6958.08   | 7722.73       | 5896.69       | 6123.17       | 7517.20       | 9073.06       | 7327.66       |
| M325T<br>851 | (M+H)+         | Uridine 5'-monophosphate (UMP)                          | 325<br>.04 | 850<br>.68 | 2244.58       | 2447.73       | 2677.55       | 2652.09   | 2661.09   | 2743.85   | 2830.55       | 2716.12       | 2742.98       | 3339.68       | 3469.11       | 3087.57       |
| M485T<br>959 | (M+H)+         | Uridine 5'-triphosphate (UTP)                           | 484<br>.98 | 959<br>.45 | 22983.93      | 24440.51      | 23684.13      | 27332.97  | 24675.52  | 28433.52  | 30106.1<br>1  | 27133.3<br>2  | 23533.6<br>9  | 31423.4<br>0  | 28768.7<br>9  | 24400.6<br>8  |
| M139T<br>554 | (M+H)+         | Urocanic acid                                           | 139<br>.05 | 554<br>.37 | 3825.61       | 1141.92       | 1724.12       | 817.58    | 1902.96   | 1323.84   | 1795.29       | 2335.89       | 860.51        | 2234.28       | 5968.03       | 840.60        |

Table S5. Binding proteins of SMO in ONS76 cells expressing SMO<sup>WT</sup> or SMO<sup>W535L</sup> with treatment of LDE225 or DMSO.

| SMO <sup>WT</sup> +DMSO-1 | SMO <sup>WT</sup> +DMSO-1 | SMO <sup>WT</sup> +LDE225-1 | SMO <sup>WT</sup> +LDE225-1 |
|---------------------------|---------------------------|-----------------------------|-----------------------------|
|---------------------------|---------------------------|-----------------------------|-----------------------------|

| Accession | Description                                                         | Accession | Description                                                         | Accession | Description                                                       | Accession | Description                                                       |
|-----------|---------------------------------------------------------------------|-----------|---------------------------------------------------------------------|-----------|-------------------------------------------------------------------|-----------|-------------------------------------------------------------------|
| 4502891   | methylosome subunit pICln [Homo sapiens]                            | 4502891   | methylosome subunit pICln [Homo sapiens]                            | 4502891   | methylosome subunit pICln [Homo sapiens]                          | 4502891   | methylosome subunit pICln [Homo sapiens]                          |
| 4506687   | 40S ribosomal protein S15 [Homo sapiens]                            | 4506687   | 40S ribosomal protein S15 [Homo sapiens]                            | 4505821   | prolactin-inducible protein precursor [Homo sapiens]              | 4505821   | prolactin-inducible protein precursor [Homo sapiens]              |
| 4885377   | histone H1.3 [Homo sapiens]                                         | 4885377   | histone H1.3 [Homo sapiens]                                         | 4506613   | 60S ribosomal protein L22 proprotein [Homo sapiens]               | 4506613   | 60S ribosomal protein L22 proprotein [Homo sapiens]               |
| 5032099   | smoothened homolog precursor [Homo sapiens]                         | 5032099   | smoothened homolog precursor [Homo sapiens]                         | 4506687   | 40S ribosomal protein S15 [Homo sapiens]                          | 4506687   | 40S ribosomal protein S15 [Homo sapiens]                          |
| 5174449   | histone H1x [Homo sapiens]                                          | 5174449   | histone H1x [Homo sapiens]                                          | 4758638   | peroxiredoxin-6 [Homo sapiens]                                    | 4758638   | peroxiredoxin-6 [Homo sapiens]                                    |
| 7661958   | bcl-2-associated transcription factor 1 isoform 1 [Homo sapiens]    | 7661958   | bcl-2-associated transcription factor 1 isoform 1 [Homo sapiens]    | 4885165   | cystatin-A [Homo sapiens]                                         | 4885165   | cystatin-A [Homo sapiens]                                         |
| 9506651   | BTB/POZ domain-containing protein KCTD5 [Homo sapiens]              | 9506651   | BTB/POZ domain-containing protein KCTD5 [Homo sapiens]              | 4885377   | histone H1.3 [Homo sapiens]                                       | 4885377   | histone H1.3 [Homo sapiens]                                       |
| 13129110  | methylosome protein 50 [Homo sapiens]                               | 13129110  | methylosome protein 50 [Homo sapiens]                               | 5032099   | smoothened homolog precursor [Homo sapiens]                       | 5032099   | smoothened homolog precursor [Homo sapiens]                       |
| 13699824  | kinesin-like protein KIF11 [Homo sapiens]                           | 13699824  | kinesin-like protein KIF11 [Homo sapiens]                           | 5174449   | histone H1x [Homo sapiens]                                        | 5174449   | histone H1x [Homo sapiens]                                        |
| 14043070  | heterogeneous nuclear ribonucleoprotein A1 isoform b [Homo sapiens] | 14043070  | heterogeneous nuclear ribonucleoprotein A1 isoform b [Homo sapiens] | 5453555   | GTP-binding nuclear protein Ran [Homo sapiens]                    | 5453555   | GTP-binding nuclear protein Ran [Homo sapiens]                    |
| 20070220  | protein arginine N-methyltransferase 5 isoform a [Homo sapiens]     | 20070220  | protein arginine N-methyltransferase 5 isoform a [Homo sapiens]     | 5803225   | 14-3-3 protein epsilon [Homo sapiens]                             | 5803225   | 14-3-3 protein epsilon [Homo sapiens]                             |
| 28173564  | keratin, type II cytoskeletal 73 [Homo sapiens]                     | 28173564  | keratin, type II cytoskeletal 73 [Homo sapiens]                     | 7661958   | bcl-2-associated transcription factor 1 isoform 1 [Homo sapiens]  | 7661958   | bcl-2-associated transcription factor 1 isoform 1 [Homo sapiens]  |
| 29570791  | casein kinase II subunit alpha isoform a [Homo sapiens]             | 29570791  | casein kinase II subunit alpha isoform a [Homo sapiens]             | 7705696   | thioredoxin domain-containing protein 12 precursor [Homo sapiens] | 7705696   | thioredoxin domain-containing protein 12 precursor [Homo sapiens] |
| 39930523  | uncharacterized protein C11orf84 [Homo sapiens]                     | 39930523  | uncharacterized protein C11orf84 [Homo sapiens]                     | 9506651   | BTB/POZ domain-containing protein KCTD5 [Homo sapiens]            | 9506651   | BTB/POZ domain-containing protein KCTD5 [Homo sapiens]            |
| 41322916  | plectin isoform 1 [Homo sapiens]                                    | 41322916  | plectin isoform 1 [Homo sapiens]                                    | 13129110  | methylosome protein 50 [Homo sapiens]                             | 13129110  | methylosome protein 50 [Homo sapiens]                             |
| 53829365  | BTB/POZ domain-containing protein KCTD2 [Homo sapiens]              | 53829365  | BTB/POZ domain-containing protein KCTD2 [Homo sapiens]              | 13699824  | kinesin-like protein KIF11 [Homo sapiens]                         | 13699824  | kinesin-like protein KIF11 [Homo sapiens]                         |



|          |                                                                         |          |                                                                         |          |                                                                           |          |                                                                           |
|----------|-------------------------------------------------------------------------|----------|-------------------------------------------------------------------------|----------|---------------------------------------------------------------------------|----------|---------------------------------------------------------------------------|
| 57013276 | tubulin alpha-1B chain [Homo sapiens]                                   | 57013276 | tubulin alpha-1B chain [Homo sapiens]                                   | 14043070 | heterogeneous nuclear ribonucleoprotein A1 isoform b [Homo sapiens]       | 14043070 | heterogeneous nuclear ribonucleoprotein A1 isoform b [Homo sapiens]       |
| 1.12E+08 | spindlin-1 [Homo sapiens]                                               | 1.12E+08 | spindlin-1 [Homo sapiens]                                               | 14210488 | dynactin subunit 5 isoform 1 [Homo sapiens]                               | 14210488 | dynactin subunit 5 isoform 1 [Homo sapiens]                               |
| 1.17E+08 | heterogeneous nuclear ribonucleoproteins C1/C2 isoform a [Homo sapiens] | 1.17E+08 | heterogeneous nuclear ribonucleoproteins C1/C2 isoform a [Homo sapiens] | 14249398 | PHD finger-like domain-containing protein 5A [Homo sapiens]               | 14249398 | PHD finger-like domain-containing protein 5A [Homo sapiens]               |
| 1.24E+08 | unconventional myosin-Ic isoform a [Homo sapiens]                       | 1.24E+08 | unconventional myosin-Ic isoform a [Homo sapiens]                       | 14589951 | DNA-directed RNA polymerases I, II, and III subunit RPABC1 [Homo sapiens] | 14589951 | DNA-directed RNA polymerases I, II, and III subunit RPABC1 [Homo sapiens] |
| 1.26E+08 | keratin, type II cytoskeletal 80 isoform K80 [Homo sapiens]             | 1.26E+08 | keratin, type II cytoskeletal 80 isoform K80 [Homo sapiens]             | 20070220 | protein arginine N-methyltransferase 5 isoform a [Homo sapiens]           | 20070220 | protein arginine N-methyltransferase 5 isoform a [Homo sapiens]           |
| 1.34E+08 | arginine and glutamate-rich protein 1 [Homo sapiens]                    | 1.34E+08 | arginine and glutamate-rich protein 1 [Homo sapiens]                    | 20270371 | carboxymethylenebutenolidase homolog [Homo sapiens]                       | 20270371 | carboxymethylenebutenolidase homolog [Homo sapiens]                       |
| 1.55E+08 | protein arginine N-methyltransferase 1 isoform 1 [Homo sapiens]         | 1.55E+08 | protein arginine N-methyltransferase 1 isoform 1 [Homo sapiens]         | 28173564 | keratin, type II cytoskeletal 73 [Homo sapiens]                           | 28173564 | keratin, type II cytoskeletal 73 [Homo sapiens]                           |
| 1.95E+08 | spectrin alpha chain, non-erythrocytic 1 isoform 1 [Homo sapiens]       | 1.95E+08 | spectrin alpha chain, non-erythrocytic 1 isoform 1 [Homo sapiens]       | 33286418 | pyruvate kinase isozymes M1/M2 isoform a [Homo sapiens]                   | 33286418 | pyruvate kinase isozymes M1/M2 isoform a [Homo sapiens]                   |
| 3.21E+08 | RPS10-NUDT3 protein [Homo sapiens]                                      | 3.21E+08 | RPS10-NUDT3 protein [Homo sapiens]                                      | 53829365 | BTB/POZ domain-containing protein KCTD2 [Homo sapiens]                    | 53829365 | BTB/POZ domain-containing protein KCTD2 [Homo sapiens]                    |
| 3.87E+08 | 40S ribosomal protein S3 isoform 2 [Homo sapiens]                       | 3.87E+08 | 40S ribosomal protein S3 isoform 2 [Homo sapiens]                       | 57013276 | tubulin alpha-1B chain [Homo sapiens]                                     | 57013276 | tubulin alpha-1B chain [Homo sapiens]                                     |
| 4.01E+08 | mitochondrial dicarboxylate carrier isoform 3 [Homo sapiens]            | 4.01E+08 | mitochondrial dicarboxylate carrier isoform 3 [Homo sapiens]            | 67782356 | corneodesmosin precursor [Homo sapiens]                                   | 67782356 | corneodesmosin precursor [Homo sapiens]                                   |
|          |                                                                         |          |                                                                         | 1.12E+08 | spindlin-1 [Homo sapiens]                                                 | 1.12E+08 | spindlin-1 [Homo sapiens]                                                 |
|          |                                                                         |          |                                                                         | 1.26E+08 | keratin, type II cytoskeletal 80 isoform K80 [Homo sapiens]               | 1.26E+08 | keratin, type II cytoskeletal 80 isoform K80 [Homo sapiens]               |
|          |                                                                         |          |                                                                         | 1.55E+08 | protein arginine N-methyltransferase 1 isoform 1 [Homo sapiens]           | 1.55E+08 | protein arginine N-methyltransferase 1 isoform 1 [Homo sapiens]           |
|          |                                                                         |          |                                                                         | 1.95E+08 | spectrin alpha chain, non-erythrocytic 1 isoform 1 [Homo sapiens]         | 1.95E+08 | spectrin alpha chain, non-erythrocytic 1 isoform 1 [Homo sapiens]         |

|                                   |                                                                     |                                   |                                                                     |                                     |                                                                     |                                     |                                                                     |
|-----------------------------------|---------------------------------------------------------------------|-----------------------------------|---------------------------------------------------------------------|-------------------------------------|---------------------------------------------------------------------|-------------------------------------|---------------------------------------------------------------------|
|                                   |                                                                     |                                   |                                                                     | 2.08E+08                            | dynactin subunit 4 isoform a [Homo sapiens]                         | 2.08E+08                            | dynactin subunit 4 isoform a [Homo sapiens]                         |
|                                   |                                                                     |                                   |                                                                     | 3.08E+08                            | taperin [Homo sapiens]                                              | 3.08E+08                            | taperin [Homo sapiens]                                              |
|                                   |                                                                     |                                   |                                                                     | 3.21E+08                            | RPS10-NUDT3 protein [Homo sapiens]                                  | 3.21E+08                            | RPS10-NUDT3 protein [Homo sapiens]                                  |
|                                   |                                                                     |                                   |                                                                     | 3.67E+08                            | myosin-10 isoform 2 [Homo sapiens]                                  | 3.67E+08                            | myosin-10 isoform 2 [Homo sapiens]                                  |
|                                   |                                                                     |                                   |                                                                     | 3.87E+08                            | 40S ribosomal protein S3 isoform 2 [Homo sapiens]                   | 3.87E+08                            | 40S ribosomal protein S3 isoform 2 [Homo sapiens]                   |
|                                   |                                                                     |                                   |                                                                     | 4.32E+08                            | dedicator of cytokinesis protein 7 isoform 1 [Homo sapiens]         | 4.32E+08                            | dedicator of cytokinesis protein 7 isoform 1 [Homo sapiens]         |
| <b>SMO<sup>W535L</sup>+DMSO-1</b> |                                                                     | <b>SMO<sup>W535L</sup>+DMSO-1</b> |                                                                     | <b>SMO<sup>W535L</sup>+LDE225-1</b> |                                                                     | <b>SMO<sup>W535L</sup>+LDE225-1</b> |                                                                     |
| Accession                         | Description                                                         | Accession                         | Description                                                         | Accession                           | Description                                                         | Accession                           | Description                                                         |
| 4502211                           | ADP-ribosylation factor 6 [Homo sapiens]                            | 4502211                           | ADP-ribosylation factor 6 [Homo sapiens]                            | 4502211                             | ADP-ribosylation factor 6 [Homo sapiens]                            | 4502211                             | ADP-ribosylation factor 6 [Homo sapiens]                            |
| 4502891                           | methylosome subunit pICln [Homo sapiens]                            | 4502891                           | methylosome subunit pICln [Homo sapiens]                            | 4502709                             | cyclin-dependent kinase 1 isoform 1 [Homo sapiens]                  | 4502709                             | cyclin-dependent kinase 1 isoform 1 [Homo sapiens]                  |
| 4503507                           | eukaryotic translation initiation factor 2 subunit 3 [Homo sapiens] | 4503507                           | eukaryotic translation initiation factor 2 subunit 3 [Homo sapiens] | 4502891                             | methylosome subunit pICln [Homo sapiens]                            | 4502891                             | methylosome subunit pICln [Homo sapiens]                            |
| 4503509                           | eukaryotic translation initiation factor 3 subunit A [Homo sapiens] | 4503509                           | eukaryotic translation initiation factor 3 subunit A [Homo sapiens] | 4502899                             | clathrin light chain A isoform a [Homo sapiens]                     | 4502899                             | clathrin light chain A isoform a [Homo sapiens]                     |
| 4503515                           | eukaryotic translation initiation factor 3 subunit H [Homo sapiens] | 4503515                           | eukaryotic translation initiation factor 3 subunit H [Homo sapiens] | 4503507                             | eukaryotic translation initiation factor 2 subunit 3 [Homo sapiens] | 4503507                             | eukaryotic translation initiation factor 2 subunit 3 [Homo sapiens] |
| 4503519                           | eukaryotic translation initiation factor 3 subunit F [Homo sapiens] | 4503519                           | eukaryotic translation initiation factor 3 subunit F [Homo sapiens] | 4503521                             | eukaryotic translation initiation factor 3 subunit E [Homo sapiens] | 4503521                             | eukaryotic translation initiation factor 3 subunit E [Homo sapiens] |
| 4503521                           | eukaryotic translation initiation factor 3 subunit E [Homo sapiens] | 4503521                           | eukaryotic translation initiation factor 3 subunit E [Homo sapiens] | 4505753                             | phosphoglycerate mutase 1 [Homo sapiens]                            | 4505753                             | phosphoglycerate mutase 1 [Homo sapiens]                            |
| 4503971                           | rab GDP dissociation inhibitor alpha [Homo sapiens]                 | 4503971                           | rab GDP dissociation inhibitor alpha [Homo sapiens]                 | 4505821                             | prolactin-inducible protein precursor [Homo sapiens]                | 4505821                             | prolactin-inducible protein precursor [Homo sapiens]                |
| 4504897                           | importin subunit alpha-2 [Homo sapiens]                             | 4504897                           | importin subunit alpha-2 [Homo sapiens]                             | 4506031                             | palmitoyl-protein thioesterase 1 isoform 1 precursor [Homo sapiens] | 4506031                             | palmitoyl-protein thioesterase 1 isoform 1 precursor [Homo sapiens] |
| 4506031                           | palmitoyl-protein thioesterase 1 isoform 1 precursor [Homo sapiens] | 4506031                           | palmitoyl-protein thioesterase 1 isoform 1 precursor [Homo sapiens] | 4506189                             | proteasome subunit alpha type-7 [Homo sapiens]                      | 4506189                             | proteasome subunit alpha type-7 [Homo sapiens]                      |

|         |                                                                      |         |                                                                      |         |                                                                     |         |                                                                     |
|---------|----------------------------------------------------------------------|---------|----------------------------------------------------------------------|---------|---------------------------------------------------------------------|---------|---------------------------------------------------------------------|
| 4506341 | ATP-binding cassette sub-family D member 3 isoform a [Homo sapiens]  | 4506341 | ATP-binding cassette sub-family D member 3 isoform a [Homo sapiens]  | 4506201 | proteasome subunit beta type-5 isoform 1 [Homo sapiens]             | 4506201 | proteasome subunit beta type-5 isoform 1 [Homo sapiens]             |
| 4506613 | 60S ribosomal protein L22 proprotein [Homo sapiens]                  | 4506613 | 60S ribosomal protein L22 proprotein [Homo sapiens]                  | 4506341 | ATP-binding cassette sub-family D member 3 isoform a [Homo sapiens] | 4506341 | ATP-binding cassette sub-family D member 3 isoform a [Homo sapiens] |
| 4506631 | 60S ribosomal protein L30 [Homo sapiens]                             | 4506631 | 60S ribosomal protein L30 [Homo sapiens]                             | 4506407 | ran-specific GTPase-activating protein [Homo sapiens]               | 4506407 | ran-specific GTPase-activating protein [Homo sapiens]               |
| 4506643 | 60S ribosomal protein L37a [Homo sapiens]                            | 4506643 | 60S ribosomal protein L37a [Homo sapiens]                            | 4506613 | 60S ribosomal protein L22 proprotein [Homo sapiens]                 | 4506613 | 60S ribosomal protein L22 proprotein [Homo sapiens]                 |
| 4506687 | 40S ribosomal protein S15 [Homo sapiens]                             | 4506687 | 40S ribosomal protein S15 [Homo sapiens]                             | 4506643 | 60S ribosomal protein L37a [Homo sapiens]                           | 4506643 | 60S ribosomal protein L37a [Homo sapiens]                           |
| 4506901 | serine/arginine-rich splicing factor 3 [Homo sapiens]                | 4506901 | serine/arginine-rich splicing factor 3 [Homo sapiens]                | 4506687 | 40S ribosomal protein S15 [Homo sapiens]                            | 4506687 | 40S ribosomal protein S15 [Homo sapiens]                            |
| 4506975 | solute carrier family 12 member 2 isoform 1 [Homo sapiens]           | 4506975 | solute carrier family 12 member 2 isoform 1 [Homo sapiens]           | 4506753 | ruvB-like 1 [Homo sapiens]                                          | 4506753 | ruvB-like 1 [Homo sapiens]                                          |
| 4507115 | fascin [Homo sapiens]                                                | 4507115 | fascin [Homo sapiens]                                                | 4507115 | fascin [Homo sapiens]                                               | 4507115 | fascin [Homo sapiens]                                               |
| 4557511 | death-associated protein kinase 3 [Homo sapiens]                     | 4557511 | death-associated protein kinase 3 [Homo sapiens]                     | 4507475 | protein-glutamine gamma-glutamyltransferase K [Homo sapiens]        | 4507475 | protein-glutamine gamma-glutamyltransferase K [Homo sapiens]        |
| 4557795 | merlin isoform 1 [Homo sapiens]                                      | 4557795 | merlin isoform 1 [Homo sapiens]                                      | 4507555 | thymopoietin isoform alpha [Homo sapiens]                           | 4507555 | thymopoietin isoform alpha [Homo sapiens]                           |
| 4757766 | rho GTPase-activating protein 1 [Homo sapiens]                       | 4757766 | rho GTPase-activating protein 1 [Homo sapiens]                       | 4557795 | merlin isoform 1 [Homo sapiens]                                     | 4557795 | merlin isoform 1 [Homo sapiens]                                     |
| 4758638 | peroxiredoxin-6 [Homo sapiens]                                       | 4758638 | peroxiredoxin-6 [Homo sapiens]                                       | 4757766 | rho GTPase-activating protein 1 [Homo sapiens]                      | 4757766 | rho GTPase-activating protein 1 [Homo sapiens]                      |
| 4758648 | kinesin-1 heavy chain [Homo sapiens]                                 | 4758648 | kinesin-1 heavy chain [Homo sapiens]                                 | 4757880 | mitotic checkpoint protein BUB3 isoform a [Homo sapiens]            | 4757880 | mitotic checkpoint protein BUB3 isoform a [Homo sapiens]            |
| 4758876 | polyadenylate-binding protein 2 [Homo sapiens]                       | 4758876 | polyadenylate-binding protein 2 [Homo sapiens]                       | 4758304 | protein disulfide-isomerase A4 precursor [Homo sapiens]             | 4758304 | protein disulfide-isomerase A4 precursor [Homo sapiens]             |
| 5031571 | actin-related protein 2 isoform b [Homo sapiens]                     | 5031571 | actin-related protein 2 isoform b [Homo sapiens]                     | 4758638 | peroxiredoxin-6 [Homo sapiens]                                      | 4758638 | peroxiredoxin-6 [Homo sapiens]                                      |
| 5031595 | actin-related protein 2/3 complex subunit 4 isoform a [Homo sapiens] | 5031595 | actin-related protein 2/3 complex subunit 4 isoform a [Homo sapiens] | 4826730 | serine/threonine-protein kinase mTOR [Homo sapiens]                 | 4826730 | serine/threonine-protein kinase mTOR [Homo sapiens]                 |

|         |                                                                        |         |                                                                        |         |                                                                      |         |                                                                      |
|---------|------------------------------------------------------------------------|---------|------------------------------------------------------------------------|---------|----------------------------------------------------------------------|---------|----------------------------------------------------------------------|
| 5031875 | lamin isoform C [Homo sapiens]                                         | 5031875 | lamin isoform C [Homo sapiens]                                         | 4826898 | profilin-1 [Homo sapiens]                                            | 4826898 | profilin-1 [Homo sapiens]                                            |
| 5032099 | smoothened homolog precursor [Homo sapiens]                            | 5032099 | smoothened homolog precursor [Homo sapiens]                            | 4885165 | cystatin-A [Homo sapiens]                                            | 4885165 | cystatin-A [Homo sapiens]                                            |
| 5174449 | histone H1x [Homo sapiens]                                             | 5174449 | histone H1x [Homo sapiens]                                             | 4885661 | tyrosine-protein kinase Yes [Homo sapiens]                           | 4885661 | tyrosine-protein kinase Yes [Homo sapiens]                           |
| 5453607 | T-complex protein 1 subunit eta isoform a [Homo sapiens]               | 5453607 | T-complex protein 1 subunit eta isoform a [Homo sapiens]               | 5031571 | actin-related protein 2 isoform b [Homo sapiens]                     | 5031571 | actin-related protein 2 isoform b [Homo sapiens]                     |
| 5453998 | importin-7 [Homo sapiens]                                              | 5453998 | importin-7 [Homo sapiens]                                              | 5031595 | actin-related protein 2/3 complex subunit 4 isoform a [Homo sapiens] | 5031595 | actin-related protein 2/3 complex subunit 4 isoform a [Homo sapiens] |
| 5454158 | valine--tRNA ligase [Homo sapiens]                                     | 5454158 | valine--tRNA ligase [Homo sapiens]                                     | 5031635 | cofilin-1 [Homo sapiens]                                             | 5031635 | cofilin-1 [Homo sapiens]                                             |
| 5730009 | zinc finger protein RFP [Homo sapiens]                                 | 5730009 | zinc finger protein RFP [Homo sapiens]                                 | 5032099 | smoothened homolog precursor [Homo sapiens]                          | 5032099 | smoothened homolog precursor [Homo sapiens]                          |
| 5730023 | ruvB-like 2 [Homo sapiens]                                             | 5730023 | ruvB-like 2 [Homo sapiens]                                             | 5032137 | vesicle-associated membrane protein 7 isoform 1 [Homo sapiens]       | 5032137 | vesicle-associated membrane protein 7 isoform 1 [Homo sapiens]       |
| 5803225 | 14-3-3 protein epsilon [Homo sapiens]                                  | 5803225 | 14-3-3 protein epsilon [Homo sapiens]                                  | 5174449 | histone H1x [Homo sapiens]                                           | 5174449 | histone H1x [Homo sapiens]                                           |
| 5902122 | spectrin beta chain, non-erythrocytic 2 [Homo sapiens]                 | 5902122 | spectrin beta chain, non-erythrocytic 2 [Homo sapiens]                 | 5453555 | GTP-binding nuclear protein Ran [Homo sapiens]                       | 5453555 | GTP-binding nuclear protein Ran [Homo sapiens]                       |
| 6005757 | FACT complex subunit SPT16 [Homo sapiens]                              | 6005757 | FACT complex subunit SPT16 [Homo sapiens]                              | 5453607 | T-complex protein 1 subunit eta isoform a [Homo sapiens]             | 5453607 | T-complex protein 1 subunit eta isoform a [Homo sapiens]             |
| 6005830 | plakophilin-3 [Homo sapiens]                                           | 6005830 | plakophilin-3 [Homo sapiens]                                           | 5453629 | dynactin subunit 2 isoform 1 [Homo sapiens]                          | 5453629 | dynactin subunit 2 isoform 1 [Homo sapiens]                          |
| 6005942 | transitional endoplasmic reticulum ATPase [Homo sapiens]               | 6005942 | transitional endoplasmic reticulum ATPase [Homo sapiens]               | 5453998 | importin-7 [Homo sapiens]                                            | 5453998 | importin-7 [Homo sapiens]                                            |
| 6912280 | activator of 90 kDa heat shock protein ATPase homolog 1 [Homo sapiens] | 6912280 | activator of 90 kDa heat shock protein ATPase homolog 1 [Homo sapiens] | 5454052 | 14-3-3 protein sigma [Homo sapiens]                                  | 5454052 | 14-3-3 protein sigma [Homo sapiens]                                  |
| 7656952 | calcyclin-binding protein isoform 1 [Homo sapiens]                     | 7656952 | calcyclin-binding protein isoform 1 [Homo sapiens]                     | 5729953 | nuclear migration protein nudC [Homo sapiens]                        | 5729953 | nuclear migration protein nudC [Homo sapiens]                        |
| 7661858 | rho GTPase-activating protein 11A isoform 1 [Homo sapiens]             | 7661858 | rho GTPase-activating protein 11A isoform 1 [Homo sapiens]             | 5730009 | zinc finger protein RFP [Homo sapiens]                               | 5730009 | zinc finger protein RFP [Homo sapiens]                               |
| 7661878 | kinesin-like protein KIF14 [Homo sapiens]                              | 7661878 | kinesin-like protein KIF14 [Homo sapiens]                              | 5730023 | ruvB-like 2 [Homo sapiens]                                           | 5730023 | ruvB-like 2 [Homo sapiens]                                           |
| 7661958 | bcl-2-associated transcription factor 1 isoform 1 [Homo sapiens]       | 7661958 | bcl-2-associated transcription factor 1 isoform 1 [Homo sapiens]       | 5803225 | 14-3-3 protein epsilon [Homo sapiens]                                | 5803225 | 14-3-3 protein epsilon [Homo sapiens]                                |

|          |                                                                                      |          |                                                                                      |         |                                                                                      |         |                                                                                      |
|----------|--------------------------------------------------------------------------------------|----------|--------------------------------------------------------------------------------------|---------|--------------------------------------------------------------------------------------|---------|--------------------------------------------------------------------------------------|
| 7662126  | signal-induced proliferation-associated 1-like protein 1 [Homo sapiens]              | 7662126  | signal-induced proliferation-associated 1-like protein 1 [Homo sapiens]              | 5902122 | spectrin beta chain, non-erythrocytic 2 [Homo sapiens]                               | 5902122 | spectrin beta chain, non-erythrocytic 2 [Homo sapiens]                               |
| 7705696  | thioredoxin domain-containing protein 12 precursor [Homo sapiens]                    | 7705696  | thioredoxin domain-containing protein 12 precursor [Homo sapiens]                    | 6005757 | FACT complex subunit SPT16 [Homo sapiens]                                            | 6005757 | FACT complex subunit SPT16 [Homo sapiens]                                            |
| 7705706  | 40S ribosomal protein S27-like [Homo sapiens]                                        | 7705706  | 40S ribosomal protein S27-like [Homo sapiens]                                        | 6005830 | plakophilin-3 [Homo sapiens]                                                         | 6005830 | plakophilin-3 [Homo sapiens]                                                         |
| 8392875  | UPF0468 protein C16orf80 [Homo sapiens]                                              | 8392875  | UPF0468 protein C16orf80 [Homo sapiens]                                              | 6005942 | transitional endoplasmic reticulum ATPase [Homo sapiens]                             | 6005942 | transitional endoplasmic reticulum ATPase [Homo sapiens]                             |
| 8923448  | 39S ribosomal protein L16, mitochondrial [Homo sapiens]                              | 8923448  | 39S ribosomal protein L16, mitochondrial [Homo sapiens]                              | 6041669 | NADH dehydrogenase [ubiquinone] 1 beta subcomplex subunit 4 isoform 1 [Homo sapiens] | 6041669 | NADH dehydrogenase [ubiquinone] 1 beta subcomplex subunit 4 isoform 1 [Homo sapiens] |
| 8923712  | actin-related protein 10 [Homo sapiens]                                              | 8923712  | actin-related protein 10 [Homo sapiens]                                              | 6912280 | activator of 90 kDa heat shock protein ATPase homolog 1 [Homo sapiens]               | 6912280 | activator of 90 kDa heat shock protein ATPase homolog 1 [Homo sapiens]               |
| 9506651  | BTB/POZ domain-containing protein KCTD5 [Homo sapiens]                               | 9506651  | BTB/POZ domain-containing protein KCTD5 [Homo sapiens]                               | 7305053 | myoferlin isoform a [Homo sapiens]                                                   | 7305053 | myoferlin isoform a [Homo sapiens]                                                   |
| 9966881  | nuclear pore complex protein Nup107 [Homo sapiens]                                   | 9966881  | nuclear pore complex protein Nup107 [Homo sapiens]                                   | 7657198 | probable dimethyladenosine transferase [Homo sapiens]                                | 7657198 | probable dimethyladenosine transferase [Homo sapiens]                                |
| 9966913  | actin-related protein 3B isoform 1 [Homo sapiens]                                    | 9966913  | actin-related protein 3B isoform 1 [Homo sapiens]                                    | 7661844 | coiled-coil domain-containing protein 22 [Homo sapiens]                              | 7661844 | coiled-coil domain-containing protein 22 [Homo sapiens]                              |
| 10863889 | U4/U6.U5 tri-snRNP-associated protein 1 [Homo sapiens]                               | 10863889 | U4/U6.U5 tri-snRNP-associated protein 1 [Homo sapiens]                               | 7661858 | rho GTPase-activating protein 11A isoform 1 [Homo sapiens]                           | 7661858 | rho GTPase-activating protein 11A isoform 1 [Homo sapiens]                           |
| 10863927 | peptidyl-prolyl cis-trans isomerase A [Homo sapiens]                                 | 10863927 | peptidyl-prolyl cis-trans isomerase A [Homo sapiens]                                 | 7661878 | kinesin-like protein KIF14 [Homo sapiens]                                            | 7661878 | kinesin-like protein KIF14 [Homo sapiens]                                            |
| 11125770 | aminoacyl tRNA synthase complex-interacting multifunctional protein 2 [Homo sapiens] | 11125770 | aminoacyl tRNA synthase complex-interacting multifunctional protein 2 [Homo sapiens] | 7661958 | bcl-2-associated transcription factor 1 isoform 1 [Homo sapiens]                     | 7661958 | bcl-2-associated transcription factor 1 isoform 1 [Homo sapiens]                     |
| 11545731 | gigaxonin [Homo sapiens]                                                             | 11545731 | gigaxonin [Homo sapiens]                                                             | 7662126 | signal-induced proliferation-associated 1-like protein 1 [Homo sapiens]              | 7662126 | signal-induced proliferation-associated 1-like protein 1 [Homo sapiens]              |
| 13129110 | methylosome protein 50 [Homo sapiens]                                                | 13129110 | methylosome protein 50 [Homo sapiens]                                                | 7705622 | WASH complex subunit CCDC53 [Homo sapiens]                                           | 7705622 | WASH complex subunit CCDC53 [Homo sapiens]                                           |
| 13259510 | dynactin subunit 1 isoform 1 [Homo sapiens]                                          | 13259510 | dynactin subunit 1 isoform 1 [Homo sapiens]                                          | 7705696 | thioredoxin domain-containing protein 12 precursor [Homo sapiens]                    | 7705696 | thioredoxin domain-containing protein 12 precursor [Homo sapiens]                    |

|          |                                                                                  |          |                                                                                  |          |                                                                                      |          |                                                                                      |
|----------|----------------------------------------------------------------------------------|----------|----------------------------------------------------------------------------------|----------|--------------------------------------------------------------------------------------|----------|--------------------------------------------------------------------------------------|
| 13569956 | actin-related protein 2/3 complex subunit 5-like protein [Homo sapiens]          | 13569956 | actin-related protein 2/3 complex subunit 5-like protein [Homo sapiens]          | 8922331  | protein mago nashi homolog 2 [Homo sapiens]                                          | 8922331  | protein mago nashi homolog 2 [Homo sapiens]                                          |
| 13654270 | ribosomal biogenesis protein LAS1L isoform 1 [Homo sapiens]                      | 13654270 | ribosomal biogenesis protein LAS1L isoform 1 [Homo sapiens]                      | 8922601  | ADP-ribosylation factor-like protein 8B [Homo sapiens]                               | 8922601  | ADP-ribosylation factor-like protein 8B [Homo sapiens]                               |
| 13699824 | kinesin-like protein KIF11 [Homo sapiens]                                        | 13699824 | kinesin-like protein KIF11 [Homo sapiens]                                        | 8923448  | 39S ribosomal protein L16, mitochondrial [Homo sapiens]                              | 8923448  | 39S ribosomal protein L16, mitochondrial [Homo sapiens]                              |
| 13775198 | SH3 domain-binding glutamic acid-rich-like protein 3 [Homo sapiens]              | 13775198 | SH3 domain-binding glutamic acid-rich-like protein 3 [Homo sapiens]              | 8923579  | regulator complex protein LAMTOR1 [Homo sapiens]                                     | 8923579  | regulator complex protein LAMTOR1 [Homo sapiens]                                     |
| 13899317 | SH3 domain-binding glutamic acid-rich-like protein 2 [Homo sapiens]              | 13899317 | SH3 domain-binding glutamic acid-rich-like protein 2 [Homo sapiens]              | 8923712  | actin-related protein 10 [Homo sapiens]                                              | 8923712  | actin-related protein 10 [Homo sapiens]                                              |
| 14043070 | heterogeneous nuclear ribonucleoprotein A1 isoform b [Homo sapiens]              | 14043070 | heterogeneous nuclear ribonucleoprotein A1 isoform b [Homo sapiens]              | 9506651  | BTB/POZ domain-containing protein KCTD5 [Homo sapiens]                               | 9506651  | BTB/POZ domain-containing protein KCTD5 [Homo sapiens]                               |
| 14210488 | dynactin subunit 5 isoform 1 [Homo sapiens]                                      | 14210488 | dynactin subunit 5 isoform 1 [Homo sapiens]                                      | 9506689  | exosome complex component RRP41 [Homo sapiens]                                       | 9506689  | exosome complex component RRP41 [Homo sapiens]                                       |
| 14249342 | alpha-internexin [Homo sapiens]                                                  | 14249342 | alpha-internexin [Homo sapiens]                                                  | 9943848  | gamma-adducin isoform a [Homo sapiens]                                               | 9943848  | gamma-adducin isoform a [Homo sapiens]                                               |
| 14589847 | protein transport protein Sec61 subunit alpha isoform 2 isoform a [Homo sapiens] | 14589847 | protein transport protein Sec61 subunit alpha isoform 2 isoform a [Homo sapiens] | 9966913  | actin-related protein 3B isoform 1 [Homo sapiens]                                    | 9966913  | actin-related protein 3B isoform 1 [Homo sapiens]                                    |
| 14589889 | cadherin-2 preproprotein [Homo sapiens]                                          | 14589889 | cadherin-2 preproprotein [Homo sapiens]                                          | 10863927 | peptidyl-prolyl cis-trans isomerase A [Homo sapiens]                                 | 10863927 | peptidyl-prolyl cis-trans isomerase A [Homo sapiens]                                 |
| 14589951 | DNA-directed RNA polymerases I, II, and III subunit RPABC1 [Homo sapiens]        | 14589951 | DNA-directed RNA polymerases I, II, and III subunit RPABC1 [Homo sapiens]        | 11125770 | aminoacyl tRNA synthase complex-interacting multifunctional protein 2 [Homo sapiens] | 11125770 | aminoacyl tRNA synthase complex-interacting multifunctional protein 2 [Homo sapiens] |
| 15147337 | E3 ubiquitin-protein ligase UBR5 [Homo sapiens]                                  | 15147337 | E3 ubiquitin-protein ligase UBR5 [Homo sapiens]                                  | 11596859 | 39S ribosomal protein L17, mitochondrial [Homo sapiens]                              | 11596859 | 39S ribosomal protein L17, mitochondrial [Homo sapiens]                              |
| 15431316 | keratin, type II cuticular Hb4 [Homo sapiens]                                    | 15431316 | keratin, type II cuticular Hb4 [Homo sapiens]                                    | 11641247 | Golgi-associated plant pathogenesis-related protein 1 [Homo sapiens]                 | 11641247 | Golgi-associated plant pathogenesis-related protein 1 [Homo sapiens]                 |
| 16117789 | 60S ribosomal protein L34 [Homo sapiens]                                         | 16117789 | 60S ribosomal protein L34 [Homo sapiens]                                         | 12383056 | microtubule-associated proteins 1A/1B light chain 3B [Homo sapiens]                  | 12383056 | microtubule-associated proteins 1A/1B light chain 3B [Homo sapiens]                  |
| 16262452 | cingulin [Homo sapiens]                                                          | 16262452 | cingulin [Homo sapiens]                                                          | 13129110 | methylosome protein 50 [Homo sapiens]                                                | 13129110 | methylosome protein 50 [Homo sapiens]                                                |

|          |                                                                                         |          |                                                                                         |          |                                                                         |          |                                                                         |
|----------|-----------------------------------------------------------------------------------------|----------|-----------------------------------------------------------------------------------------|----------|-------------------------------------------------------------------------|----------|-------------------------------------------------------------------------|
| 16554629 | WD repeat-containing protein 5 [Homo sapiens]                                           | 16554629 | WD repeat-containing protein 5 [Homo sapiens]                                           | 13569956 | actin-related protein 2/3 complex subunit 5-like protein [Homo sapiens] | 13569956 | actin-related protein 2/3 complex subunit 5-like protein [Homo sapiens] |
| 16950593 | 28S ribosomal protein S21, mitochondrial [Homo sapiens]                                 | 16950593 | 28S ribosomal protein S21, mitochondrial [Homo sapiens]                                 | 13699824 | kinesin-like protein KIF11 [Homo sapiens]                               | 13699824 | kinesin-like protein KIF11 [Homo sapiens]                               |
| 17158023 | protein FAM207A [Homo sapiens]                                                          | 17158023 | protein FAM207A [Homo sapiens]                                                          | 13775198 | SH3 domain-binding glutamic acid-rich-like protein 3 [Homo sapiens]     | 13775198 | SH3 domain-binding glutamic acid-rich-like protein 3 [Homo sapiens]     |
| 17388799 | dnaJ homolog subfamily B member 6 isoform a [Homo sapiens]                              | 17388799 | dnaJ homolog subfamily B member 6 isoform a [Homo sapiens]                              | 13899317 | SH3 domain-binding glutamic acid-rich-like protein 2 [Homo sapiens]     | 13899317 | SH3 domain-binding glutamic acid-rich-like protein 2 [Homo sapiens]     |
| 18644728 | nucleolar protein 6 alpha isoform [Homo sapiens]                                        | 18644728 | nucleolar protein 6 alpha isoform [Homo sapiens]                                        | 13994151 | PDZ and LIM domain protein 1 [Homo sapiens]                             | 13994151 | PDZ and LIM domain protein 1 [Homo sapiens]                             |
| 19115964 | 1-phosphatidylinositol 4,5-bisphosphate phosphodiesterase delta-3 [Homo sapiens]        | 19115964 | 1-phosphatidylinositol 4,5-bisphosphate phosphodiesterase delta-3 [Homo sapiens]        | 14043070 | heterogeneous nuclear ribonucleoprotein A1 isoform b [Homo sapiens]     | 14043070 | heterogeneous nuclear ribonucleoprotein A1 isoform b [Homo sapiens]     |
| 19913369 | transducin beta-like protein 3 [Homo sapiens]                                           | 19913369 | transducin beta-like protein 3 [Homo sapiens]                                           | 14149607 | H(+)/Cl(-) exchange transporter 7 isoform a [Homo sapiens]              | 14149607 | H(+)/Cl(-) exchange transporter 7 isoform a [Homo sapiens]              |
| 20070220 | protein arginine N-methyltransferase 5 isoform a [Homo sapiens]                         | 20070220 | protein arginine N-methyltransferase 5 isoform a [Homo sapiens]                         | 14210488 | dynactin subunit 5 isoform 1 [Homo sapiens]                             | 14210488 | dynactin subunit 5 isoform 1 [Homo sapiens]                             |
| 21264616 | epidermal growth factor receptor kinase substrate 8-like protein 2 [Homo sapiens]       | 21264616 | epidermal growth factor receptor kinase substrate 8-like protein 2 [Homo sapiens]       | 14251209 | chloride intracellular channel protein 1 [Homo sapiens]                 | 14251209 | chloride intracellular channel protein 1 [Homo sapiens]                 |
| 21361282 | serine/arginine-rich splicing factor 4 [Homo sapiens]                                   | 21361282 | serine/arginine-rich splicing factor 4 [Homo sapiens]                                   | 14589889 | cadherin-2 preproprotein [Homo sapiens]                                 | 14589889 | cadherin-2 preproprotein [Homo sapiens]                                 |
| 21361576 | nucleolar protein of 40 kDa [Homo sapiens]                                              | 21361576 | nucleolar protein of 40 kDa [Homo sapiens]                                              | 15431316 | keratin, type II cuticular Hb4 [Homo sapiens]                           | 15431316 | keratin, type II cuticular Hb4 [Homo sapiens]                           |
| 21361794 | cullin-associated NEDD8-dissociated protein 1 [Homo sapiens]                            | 21361794 | cullin-associated NEDD8-dissociated protein 1 [Homo sapiens]                            | 16117789 | 60S ribosomal protein L34 [Homo sapiens]                                | 16117789 | 60S ribosomal protein L34 [Homo sapiens]                                |
| 22027646 | angiomin-like protein 1 [Homo sapiens]                                                  | 22027646 | angiomin-like protein 1 [Homo sapiens]                                                  | 16262452 | cingulin [Homo sapiens]                                                 | 16262452 | cingulin [Homo sapiens]                                                 |
| 22325356 | PALM2-AKAP2 protein isoform 2 [Homo sapiens]                                            | 22325356 | PALM2-AKAP2 protein isoform 2 [Homo sapiens]                                            | 17158023 | protein FAM207A [Homo sapiens]                                          | 17158023 | protein FAM207A [Homo sapiens]                                          |
| 24233517 | inhibitor of nuclear factor kappa-B kinase-interacting protein isoform 1 [Homo sapiens] | 24233517 | inhibitor of nuclear factor kappa-B kinase-interacting protein isoform 1 [Homo sapiens] | 17388799 | dnaJ homolog subfamily B member 6 isoform a [Homo sapiens]              | 17388799 | dnaJ homolog subfamily B member 6 isoform a [Homo sapiens]              |

|          |                                                                                            |          |                                                                                            |          |                                                                                  |          |                                                                                  |
|----------|--------------------------------------------------------------------------------------------|----------|--------------------------------------------------------------------------------------------|----------|----------------------------------------------------------------------------------|----------|----------------------------------------------------------------------------------|
| 24797086 | importin-5 [Homo sapiens]                                                                  | 24797086 | importin-5 [Homo sapiens]                                                                  | 19115964 | 1-phosphatidylinositol 4,5-bisphosphate phosphodiesterase delta-3 [Homo sapiens] | 19115964 | 1-phosphatidylinositol 4,5-bisphosphate phosphodiesterase delta-3 [Homo sapiens] |
| 25777602 | 26S proteasome non-ATPase regulatory subunit 2 [Homo sapiens]                              | 25777602 | 26S proteasome non-ATPase regulatory subunit 2 [Homo sapiens]                              | 19913406 | DNA topoisomerase 2-alpha [Homo sapiens]                                         | 19913406 | DNA topoisomerase 2-alpha [Homo sapiens]                                         |
| 26667203 | calcium/calmodulin-dependent protein kinase type II subunit gamma isoform 1 [Homo sapiens] | 26667203 | calcium/calmodulin-dependent protein kinase type II subunit gamma isoform 1 [Homo sapiens] | 20070220 | protein arginine N-methyltransferase 5 isoform a [Homo sapiens]                  | 20070220 | protein arginine N-methyltransferase 5 isoform a [Homo sapiens]                  |
| 29570791 | casein kinase II subunit alpha isoform a [Homo sapiens]                                    | 29570791 | casein kinase II subunit alpha isoform a [Homo sapiens]                                    | 21071032 | probable ATP-dependent RNA helicase DDX41 [Homo sapiens]                         | 21071032 | probable ATP-dependent RNA helicase DDX41 [Homo sapiens]                         |
| 29725607 | protein unc-45 homolog A isoform 2 [Homo sapiens]                                          | 29725607 | protein unc-45 homolog A isoform 2 [Homo sapiens]                                          | 21264315 | EH domain-containing protein 4 [Homo sapiens]                                    | 21264315 | EH domain-containing protein 4 [Homo sapiens]                                    |
| 29826321 | alpha-adducin isoform b [Homo sapiens]                                                     | 29826321 | alpha-adducin isoform b [Homo sapiens]                                                     | 21328448 | 14-3-3 protein beta/alpha [Homo sapiens]                                         | 21328448 | 14-3-3 protein beta/alpha [Homo sapiens]                                         |
| 29837655 | polymerase delta-interacting protein 3 isoform 1 [Homo sapiens]                            | 29837655 | polymerase delta-interacting protein 3 isoform 1 [Homo sapiens]                            | 21361091 | ubiquitin carboxyl-terminal hydrolase isozyme L1 [Homo sapiens]                  | 21361091 | ubiquitin carboxyl-terminal hydrolase isozyme L1 [Homo sapiens]                  |
| 30089962 | serine/threonine-protein kinase MRCK alpha isoform B [Homo sapiens]                        | 30089962 | serine/threonine-protein kinase MRCK alpha isoform B [Homo sapiens]                        | 21361282 | serine/arginine-rich splicing factor 4 [Homo sapiens]                            | 21361282 | serine/arginine-rich splicing factor 4 [Homo sapiens]                            |
| 30348954 | E3 ubiquitin-protein ligase MIB1 [Homo sapiens]                                            | 30348954 | E3 ubiquitin-protein ligase MIB1 [Homo sapiens]                                            | 21361659 | importin-9 [Homo sapiens]                                                        | 21361659 | importin-9 [Homo sapiens]                                                        |
| 31541941 | heat shock 70 kDa protein 4L [Homo sapiens]                                                | 31541941 | heat shock 70 kDa protein 4L [Homo sapiens]                                                | 21464101 | 14-3-3 protein gamma [Homo sapiens]                                              | 21464101 | 14-3-3 protein gamma [Homo sapiens]                                              |
| 32967311 | ephrin type-A receptor 2 precursor [Homo sapiens]                                          | 32967311 | ephrin type-A receptor 2 precursor [Homo sapiens]                                          | 21618340 | signal transducer and activator of transcription 3 isoform 1 [Homo sapiens]      | 21618340 | signal transducer and activator of transcription 3 isoform 1 [Homo sapiens]      |
| 33188445 | microtubule-actin cross-linking factor 1 [Homo sapiens]                                    | 33188445 | microtubule-actin cross-linking factor 1 [Homo sapiens]                                    | 21624607 | coactosin-like protein [Homo sapiens]                                            | 21624607 | coactosin-like protein [Homo sapiens]                                            |
| 33356552 | G patch domain-containing protein 4 isoform 1 [Homo sapiens]                               | 33356552 | G patch domain-containing protein 4 isoform 1 [Homo sapiens]                               | 22027646 | angiomin-like protein 1 [Homo sapiens]                                           | 22027646 | angiomin-like protein 1 [Homo sapiens]                                           |
| 34328899 | tyrosine-protein phosphatase non-receptor type 14 [Homo sapiens]                           | 34328899 | tyrosine-protein phosphatase non-receptor type 14 [Homo sapiens]                           | 22094987 | regulatory-associated protein of mTOR isoform 1 [Homo sapiens]                   | 22094987 | regulatory-associated protein of mTOR isoform 1 [Homo sapiens]                   |
| 35493811 | RNA-binding protein 39 isoform a [Homo sapiens]                                            | 35493811 | RNA-binding protein 39 isoform a [Homo sapiens]                                            | 22325356 | PALM2-AKAP2 protein isoform 2 [Homo sapiens]                                     | 22325356 | PALM2-AKAP2 protein isoform 2 [Homo sapiens]                                     |



|          |                                                                                  |          |                                                                                  |          |                                                                                            |          |                                                                                            |
|----------|----------------------------------------------------------------------------------|----------|----------------------------------------------------------------------------------|----------|--------------------------------------------------------------------------------------------|----------|--------------------------------------------------------------------------------------------|
| 38026934 | rho guanine nucleotide exchange factor 11 isoform 2 [Homo sapiens]               | 38026934 | rho guanine nucleotide exchange factor 11 isoform 2 [Homo sapiens]               | 23110942 | proteasome subunit alpha type-5 isoform 1 [Homo sapiens]                                   | 23110942 | proteasome subunit alpha type-5 isoform 1 [Homo sapiens]                                   |
| 38045910 | laminin subunit alpha-3 isoform 1 precursor [Homo sapiens]                       | 38045910 | laminin subunit alpha-3 isoform 1 precursor [Homo sapiens]                       | 23111028 | sorting nexin-11 [Homo sapiens]                                                            | 23111028 | sorting nexin-11 [Homo sapiens]                                                            |
| 38045919 | huntingtin-interacting protein 1 isoform 1 [Homo sapiens]                        | 38045919 | huntingtin-interacting protein 1 isoform 1 [Homo sapiens]                        | 23503295 | casein kinase II subunit beta [Homo sapiens]                                               | 23503295 | casein kinase II subunit beta [Homo sapiens]                                               |
| 38176300 | nestin [Homo sapiens]                                                            | 38176300 | nestin [Homo sapiens]                                                            | 23503301 | protein FAM71C [Homo sapiens]                                                              | 23503301 | protein FAM71C [Homo sapiens]                                                              |
| 38327039 | heat shock 70 kDa protein 4 [Homo sapiens]                                       | 38327039 | heat shock 70 kDa protein 4 [Homo sapiens]                                       | 23510340 | ubiquitin-like modifier-activating enzyme 1 [Homo sapiens]                                 | 23510340 | ubiquitin-like modifier-activating enzyme 1 [Homo sapiens]                                 |
| 39930523 | uncharacterized protein C11orf84 [Homo sapiens]                                  | 39930523 | uncharacterized protein C11orf84 [Homo sapiens]                                  | 23510448 | DNA replication licensing factor MCM5 [Homo sapiens]                                       | 23510448 | DNA replication licensing factor MCM5 [Homo sapiens]                                       |
| 39995082 | tRNA (cytosine(34)-C(5))-methyltransferase isoform 1 [Homo sapiens]              | 39995082 | tRNA (cytosine(34)-C(5))-methyltransferase isoform 1 [Homo sapiens]              | 25777600 | 26S proteasome non-ATPase regulatory subunit 1 isoform 1 [Homo sapiens]                    | 25777600 | 26S proteasome non-ATPase regulatory subunit 1 isoform 1 [Homo sapiens]                    |
| 40217825 | SLIT and NTRK-like protein 6 precursor [Homo sapiens]                            | 40217825 | SLIT and NTRK-like protein 6 precursor [Homo sapiens]                            | 25777602 | 26S proteasome non-ATPase regulatory subunit 2 [Homo sapiens]                              | 25777602 | 26S proteasome non-ATPase regulatory subunit 2 [Homo sapiens]                              |
| 40255047 | pleckstrin homology domain-containing family H member 3 precursor [Homo sapiens] | 40255047 | pleckstrin homology domain-containing family H member 3 precursor [Homo sapiens] | 26667180 | calcium/calmodulin-dependent protein kinase type II subunit delta isoform 3 [Homo sapiens] | 26667180 | calcium/calmodulin-dependent protein kinase type II subunit delta isoform 3 [Homo sapiens] |
| 40353727 | synaptopodin isoform A [Homo sapiens]                                            | 40353727 | synaptopodin isoform A [Homo sapiens]                                            | 29570791 | casein kinase II subunit alpha isoform a [Homo sapiens]                                    | 29570791 | casein kinase II subunit alpha isoform a [Homo sapiens]                                    |
| 41322912 | plectin isoform 1f [Homo sapiens]                                                | 41322912 | plectin isoform 1f [Homo sapiens]                                                | 29725607 | protein unc-45 homolog A isoform 2 [Homo sapiens]                                          | 29725607 | protein unc-45 homolog A isoform 2 [Homo sapiens]                                          |
| 41322916 | plectin isoform 1 [Homo sapiens]                                                 | 41322916 | plectin isoform 1 [Homo sapiens]                                                 | 29826321 | alpha-adducin isoform b [Homo sapiens]                                                     | 29826321 | alpha-adducin isoform b [Homo sapiens]                                                     |
| 42544159 | heat shock protein 105 kDa [Homo sapiens]                                        | 42544159 | heat shock protein 105 kDa [Homo sapiens]                                        | 30089962 | serine/threonine-protein kinase MRCK alpha isoform B [Homo sapiens]                        | 30089962 | serine/threonine-protein kinase MRCK alpha isoform B [Homo sapiens]                        |
| 42544193 | galectin-8 isoform a [Homo sapiens]                                              | 42544193 | galectin-8 isoform a [Homo sapiens]                                              | 31881740 | solute carrier family 12 member 9 isoform 1 [Homo sapiens]                                 | 31881740 | solute carrier family 12 member 9 isoform 1 [Homo sapiens]                                 |
| 42716280 | vigilin isoform a [Homo sapiens]                                                 | 42716280 | vigilin isoform a [Homo sapiens]                                                 | 32484979 | AP-3 complex subunit beta-1 isoform 1 [Homo sapiens]                                       | 32484979 | AP-3 complex subunit beta-1 isoform 1 [Homo sapiens]                                       |

|          |                                                                        |          |                                                                        |          |                                                                             |          |                                                                             |
|----------|------------------------------------------------------------------------|----------|------------------------------------------------------------------------|----------|-----------------------------------------------------------------------------|----------|-----------------------------------------------------------------------------|
| 42822874 | ribonuclease inhibitor [Homo sapiens]                                  | 42822874 | ribonuclease inhibitor [Homo sapiens]                                  | 32528282 | cytosolic acyl coenzyme A thioester hydrolase isoform hBACHb [Homo sapiens] | 32528282 | cytosolic acyl coenzyme A thioester hydrolase isoform hBACHb [Homo sapiens] |
| 44680105 | caldesmon isoform 1 [Homo sapiens]                                     | 44680105 | caldesmon isoform 1 [Homo sapiens]                                     | 32967311 | ephrin type-A receptor 2 precursor [Homo sapiens]                           | 32967311 | ephrin type-A receptor 2 precursor [Homo sapiens]                           |
| 45439306 | aspartate--tRNA ligase, cytoplasmic [Homo sapiens]                     | 45439306 | aspartate--tRNA ligase, cytoplasmic [Homo sapiens]                     | 33188445 | microtubule-actin cross-linking factor 1 [Homo sapiens]                     | 33188445 | microtubule-actin cross-linking factor 1 [Homo sapiens]                     |
| 45439327 | periplakin [Homo sapiens]                                              | 45439327 | periplakin [Homo sapiens]                                              | 34328899 | tyrosine-protein phosphatase non-receptor type 14 [Homo sapiens]            | 34328899 | tyrosine-protein phosphatase non-receptor type 14 [Homo sapiens]            |
| 45827706 | protein quaking isoform HQK-5 [Homo sapiens]                           | 45827706 | protein quaking isoform HQK-5 [Homo sapiens]                           | 35493811 | RNA-binding protein 39 isoform a [Homo sapiens]                             | 35493811 | RNA-binding protein 39 isoform a [Homo sapiens]                             |
| 46249397 | ras-related GTP-binding protein B long isoform [Homo sapiens]          | 46249397 | ras-related GTP-binding protein B long isoform [Homo sapiens]          | 38045919 | huntingtin-interacting protein 1 isoform 1 [Homo sapiens]                   | 38045919 | huntingtin-interacting protein 1 isoform 1 [Homo sapiens]                   |
| 47132587 | protein kinase C delta-binding protein [Homo sapiens]                  | 47132587 | protein kinase C delta-binding protein [Homo sapiens]                  | 38176300 | nestin [Homo sapiens]                                                       | 38176300 | nestin [Homo sapiens]                                                       |
| 49472822 | eukaryotic translation initiation factor 3 subunit G [Homo sapiens]    | 49472822 | eukaryotic translation initiation factor 3 subunit G [Homo sapiens]    | 38327039 | heat shock 70 kDa protein 4 [Homo sapiens]                                  | 38327039 | heat shock 70 kDa protein 4 [Homo sapiens]                                  |
| 49472841 | A-kinase anchor protein 8-like [Homo sapiens]                          | 49472841 | A-kinase anchor protein 8-like [Homo sapiens]                          | 38569421 | ATP-citrate synthase isoform 1 [Homo sapiens]                               | 38569421 | ATP-citrate synthase isoform 1 [Homo sapiens]                               |
| 50658065 | structural maintenance of chromosomes protein 4 [Homo sapiens]         | 50658065 | structural maintenance of chromosomes protein 4 [Homo sapiens]         | 39930523 | uncharacterized protein C11orf84 [Homo sapiens]                             | 39930523 | uncharacterized protein C11orf84 [Homo sapiens]                             |
| 51093861 | caspase recruitment domain-containing protein 10 [Homo sapiens]        | 51093861 | caspase recruitment domain-containing protein 10 [Homo sapiens]        | 40018629 | WASH complex subunit 7 [Homo sapiens]                                       | 40018629 | WASH complex subunit 7 [Homo sapiens]                                       |
| 51173717 | actin-binding LIM protein 1 isoform s [Homo sapiens]                   | 51173717 | actin-binding LIM protein 1 isoform s [Homo sapiens]                   | 40217825 | SLIT and NTRK-like protein 6 precursor [Homo sapiens]                       | 40217825 | SLIT and NTRK-like protein 6 precursor [Homo sapiens]                       |
| 53759151 | acyl-CoA desaturase [Homo sapiens]                                     | 53759151 | acyl-CoA desaturase [Homo sapiens]                                     | 40353727 | synaptopodin isoform A [Homo sapiens]                                       | 40353727 | synaptopodin isoform A [Homo sapiens]                                       |
| 53829374 | plakophilin-4 isoform a [Homo sapiens]                                 | 53829374 | plakophilin-4 isoform a [Homo sapiens]                                 | 41322912 | plectin isoform 1f [Homo sapiens]                                           | 41322912 | plectin isoform 1f [Homo sapiens]                                           |
| 55749621 | pleckstrin homology domain-containing family G member 3 [Homo sapiens] | 55749621 | pleckstrin homology domain-containing family G member 3 [Homo sapiens] | 41322916 | plectin isoform 1 [Homo sapiens]                                            | 41322916 | plectin isoform 1 [Homo sapiens]                                            |
| 55953087 | nucleolar GTP-binding protein 1 [Homo sapiens]                         | 55953087 | nucleolar GTP-binding protein 1 [Homo sapiens]                         | 42544159 | heat shock protein 105 kDa [Homo sapiens]                                   | 42544159 | heat shock protein 105 kDa [Homo sapiens]                                   |

|          |                                                                                         |          |                                                                                         |          |                                                                        |          |                                                                        |
|----------|-----------------------------------------------------------------------------------------|----------|-----------------------------------------------------------------------------------------|----------|------------------------------------------------------------------------|----------|------------------------------------------------------------------------|
| 56549121 | dynamin-2 isoform 1 [Homo sapiens]                                                      | 56549121 | dynamin-2 isoform 1 [Homo sapiens]                                                      | 42822874 | ribonuclease inhibitor [Homo sapiens]                                  | 42822874 | ribonuclease inhibitor [Homo sapiens]                                  |
| 57013276 | tubulin alpha-1B chain [Homo sapiens]                                                   | 57013276 | tubulin alpha-1B chain [Homo sapiens]                                                   | 45439306 | aspartate--tRNA ligase, cytoplasmic [Homo sapiens]                     | 45439306 | aspartate--tRNA ligase, cytoplasmic [Homo sapiens]                     |
| 58219792 | ras-related protein Rap-1b isoform 1 precursor [Homo sapiens]                           | 58219792 | ras-related protein Rap-1b isoform 1 precursor [Homo sapiens]                           | 45439327 | periplakin [Homo sapiens]                                              | 45439327 | periplakin [Homo sapiens]                                              |
| 58331242 | FH1/FH2 domain-containing protein 3 [Homo sapiens]                                      | 58331242 | FH1/FH2 domain-containing protein 3 [Homo sapiens]                                      | 46249397 | ras-related GTP-binding protein B long isoform [Homo sapiens]          | 46249397 | ras-related GTP-binding protein B long isoform [Homo sapiens]          |
| 59850762 | uveal autoantigen with coiled-coil domains and ankyrin repeats isoform 1 [Homo sapiens] | 59850762 | uveal autoantigen with coiled-coil domains and ankyrin repeats isoform 1 [Homo sapiens] | 46275835 | protein FAM45A [Homo sapiens]                                          | 46275835 | protein FAM45A [Homo sapiens]                                          |
| 61676188 | E3 ubiquitin-protein ligase HUWE1 [Homo sapiens]                                        | 61676188 | E3 ubiquitin-protein ligase HUWE1 [Homo sapiens]                                        | 47132587 | protein kinase C delta-binding protein [Homo sapiens]                  | 47132587 | protein kinase C delta-binding protein [Homo sapiens]                  |
| 61835148 | fragile X mental retardation syndrome-related protein 1 isoform a [Homo sapiens]        | 61835148 | fragile X mental retardation syndrome-related protein 1 isoform a [Homo sapiens]        | 48255929 | periphilin-1 isoform 1 [Homo sapiens]                                  | 48255929 | periphilin-1 isoform 1 [Homo sapiens]                                  |
| 63176611 | SAFB-like transcription modulator isoform a [Homo sapiens]                              | 63176611 | SAFB-like transcription modulator isoform a [Homo sapiens]                              | 50658065 | structural maintenance of chromosomes protein 4 [Homo sapiens]         | 50658065 | structural maintenance of chromosomes protein 4 [Homo sapiens]         |
| 66933016 | inosine-5'-monophosphate dehydrogenase 2 [Homo sapiens]                                 | 66933016 | inosine-5'-monophosphate dehydrogenase 2 [Homo sapiens]                                 | 51173717 | actin-binding LIM protein 1 isoforms [Homo sapiens]                    | 51173717 | actin-binding LIM protein 1 isoforms [Homo sapiens]                    |
| 67944630 | 60S ribosomal protein L9 [Homo sapiens]                                                 | 67944630 | 60S ribosomal protein L9 [Homo sapiens]                                                 | 53759151 | acyl-CoA desaturase [Homo sapiens]                                     | 53759151 | acyl-CoA desaturase [Homo sapiens]                                     |
| 68303572 | casein kinase I isoform alpha isoform 2 [Homo sapiens]                                  | 68303572 | casein kinase I isoform alpha isoform 2 [Homo sapiens]                                  | 53829365 | BTB/POZ domain-containing protein KCTD2 [Homo sapiens]                 | 53829365 | BTB/POZ domain-containing protein KCTD2 [Homo sapiens]                 |
| 70906430 | AP-2 complex subunit sigma isoform AP17 [Homo sapiens]                                  | 70906430 | AP-2 complex subunit sigma isoform AP17 [Homo sapiens]                                  | 53829374 | plakophilin-4 isoform a [Homo sapiens]                                 | 53829374 | plakophilin-4 isoform a [Homo sapiens]                                 |
| 71143119 | signal-induced proliferation-associated 1-like protein 3 [Homo sapiens]                 | 71143119 | signal-induced proliferation-associated 1-like protein 3 [Homo sapiens]                 | 55749621 | pleckstrin homology domain-containing family G member 3 [Homo sapiens] | 55749621 | pleckstrin homology domain-containing family G member 3 [Homo sapiens] |
| 71361682 | nuclear mitotic apparatus protein 1 [Homo sapiens]                                      | 71361682 | nuclear mitotic apparatus protein 1 [Homo sapiens]                                      | 56549121 | dynamin-2 isoform 1 [Homo sapiens]                                     | 56549121 | dynamin-2 isoform 1 [Homo sapiens]                                     |
| 73695475 | HEAT repeat-containing protein 1 [Homo sapiens]                                         | 73695475 | HEAT repeat-containing protein 1 [Homo sapiens]                                         | 56549640 | septin-2 [Homo sapiens]                                                | 56549640 | septin-2 [Homo sapiens]                                                |

|          |                                                                                                       |          |                                                                                                       |          |                                                                                         |          |                                                                                         |
|----------|-------------------------------------------------------------------------------------------------------|----------|-------------------------------------------------------------------------------------------------------|----------|-----------------------------------------------------------------------------------------|----------|-----------------------------------------------------------------------------------------|
| 74272284 | membrane-associated guanylate kinase, WW and PDZ domain-containing protein 1 isoform c [Homo sapiens] | 74272284 | membrane-associated guanylate kinase, WW and PDZ domain-containing protein 1 isoform c [Homo sapiens] | 57013276 | tubulin alpha-1B chain [Homo sapiens]                                                   | 57013276 | tubulin alpha-1B chain [Homo sapiens]                                                   |
| 83367072 | eukaryotic translation initiation factor 3 subunit B [Homo sapiens]                                   | 83367072 | eukaryotic translation initiation factor 3 subunit B [Homo sapiens]                                   | 58331242 | FH1/FH2 domain-containing protein 3 [Homo sapiens]                                      | 58331242 | FH1/FH2 domain-containing protein 3 [Homo sapiens]                                      |
| 83776600 | aurora kinase B isoform 1 [Homo sapiens]                                                              | 83776600 | aurora kinase B isoform 1 [Homo sapiens]                                                              | 59850762 | uveal autoantigen with coiled-coil domains and ankyrin repeats isoform 1 [Homo sapiens] | 59850762 | uveal autoantigen with coiled-coil domains and ankyrin repeats isoform 1 [Homo sapiens] |
| 91208426 | pre-mRNA-processing-splicing factor 8 [Homo sapiens]                                                  | 91208426 | pre-mRNA-processing-splicing factor 8 [Homo sapiens]                                                  | 61835148 | fragile X mental retardation syndrome-related protein 1 isoform a [Homo sapiens]        | 61835148 | fragile X mental retardation syndrome-related protein 1 isoform a [Homo sapiens]        |
| 92110027 | glutaminyl-peptide cyclotransferase-like protein isoform 1 [Homo sapiens]                             | 92110027 | glutaminyl-peptide cyclotransferase-like protein isoform 1 [Homo sapiens]                             | 62420875 | integrin-linked protein kinase isoform 1 [Homo sapiens]                                 | 62420875 | integrin-linked protein kinase isoform 1 [Homo sapiens]                                 |
| 94557305 | 39S ribosomal protein L19, mitochondrial [Homo sapiens]                                               | 94557305 | 39S ribosomal protein L19, mitochondrial [Homo sapiens]                                               | 66933016 | inosine-5'-monophosphate dehydrogenase 2 [Homo sapiens]                                 | 66933016 | inosine-5'-monophosphate dehydrogenase 2 [Homo sapiens]                                 |
| 94721241 | isoleucine--tRNA ligase, cytoplasmic [Homo sapiens]                                                   | 94721241 | isoleucine--tRNA ligase, cytoplasmic [Homo sapiens]                                                   | 67782356 | corneodesmosin precursor [Homo sapiens]                                                 | 67782356 | corneodesmosin precursor [Homo sapiens]                                                 |
| 94721261 | 2',3'-cyclic-nucleotide 3'-phosphodiesterase [Homo sapiens]                                           | 94721261 | 2',3'-cyclic-nucleotide 3'-phosphodiesterase [Homo sapiens]                                           | 67944630 | 60S ribosomal protein L9 [Homo sapiens]                                                 | 67944630 | 60S ribosomal protein L9 [Homo sapiens]                                                 |
| 1.09E+08 | centrosomal protein of 170 kDa isoform alpha [Homo sapiens]                                           | 1.09E+08 | centrosomal protein of 170 kDa isoform alpha [Homo sapiens]                                           | 68303572 | casein kinase I isoform alpha isoform 2 [Homo sapiens]                                  | 68303572 | casein kinase I isoform alpha isoform 2 [Homo sapiens]                                  |
| 1.1E+08  | WD40 repeat-containing protein SMU1 [Homo sapiens]                                                    | 1.1E+08  | WD40 repeat-containing protein SMU1 [Homo sapiens]                                                    | 68989256 | ras and Rab interactor 1 [Homo sapiens]                                                 | 68989256 | ras and Rab interactor 1 [Homo sapiens]                                                 |
| 1.11E+08 | collagen alpha-1(XVIII) chain isoform 1 precursor [Homo sapiens]                                      | 1.11E+08 | collagen alpha-1(XVIII) chain isoform 1 precursor [Homo sapiens]                                      | 70906430 | AP-2 complex subunit sigma isoform AP17 [Homo sapiens]                                  | 70906430 | AP-2 complex subunit sigma isoform AP17 [Homo sapiens]                                  |
| 1.12E+08 | spindlin-1 [Homo sapiens]                                                                             | 1.12E+08 | spindlin-1 [Homo sapiens]                                                                             | 71361682 | nuclear mitotic apparatus protein 1 [Homo sapiens]                                      | 71361682 | nuclear mitotic apparatus protein 1 [Homo sapiens]                                      |
| 1.12E+08 | SLIT-ROBO Rho GTPase-activating protein 2 isoform a [Homo sapiens]                                    | 1.12E+08 | SLIT-ROBO Rho GTPase-activating protein 2 isoform a [Homo sapiens]                                    | 77404397 | staphylococcal nuclease domain-containing protein 1 [Homo sapiens]                      | 77404397 | staphylococcal nuclease domain-containing protein 1 [Homo sapiens]                      |
| 1.12E+08 | synemin isoform A [Homo sapiens]                                                                      | 1.12E+08 | synemin isoform A [Homo sapiens]                                                                      | 81295407 | acyl-coenzyme A thioesterase 9, mitochondrial isoform a precursor [Homo sapiens]        | 81295407 | acyl-coenzyme A thioesterase 9, mitochondrial isoform a precursor [Homo sapiens]        |
| 1.13E+08 | casein kinase I isoform gamma-3 isoform 4 [Homo sapiens]                                              | 1.13E+08 | casein kinase I isoform gamma-3 isoform 4 [Homo sapiens]                                              | 82775371 | coiled-coil domain-containing protein 93 [Homo sapiens]                                 | 82775371 | coiled-coil domain-containing protein 93 [Homo sapiens]                                 |

|          |                                                                                |          |                                                                                |          |                                                                                |          |                                                                                |
|----------|--------------------------------------------------------------------------------|----------|--------------------------------------------------------------------------------|----------|--------------------------------------------------------------------------------|----------|--------------------------------------------------------------------------------|
| 1.17E+08 | cytoplasmic FMR1-interacting protein 2 [Homo sapiens]                          | 1.17E+08 | cytoplasmic FMR1-interacting protein 2 [Homo sapiens]                          | 83367072 | eukaryotic translation initiation factor 3 subunit B [Homo sapiens]            | 83367072 | eukaryotic translation initiation factor 3 subunit B [Homo sapiens]            |
| 1.17E+08 | heterogeneous nuclear ribonucleoproteins C1/C2 isoform a [Homo sapiens]        | 1.17E+08 | heterogeneous nuclear ribonucleoproteins C1/C2 isoform a [Homo sapiens]        | 83776600 | aurora kinase B isoform 1 [Homo sapiens]                                       | 83776600 | aurora kinase B isoform 1 [Homo sapiens]                                       |
| 1.19E+08 | formin-like protein 3 isoform 1 [Homo sapiens]                                 | 1.19E+08 | formin-like protein 3 isoform 1 [Homo sapiens]                                 | 94557305 | 39S ribosomal protein L19, mitochondrial [Homo sapiens]                        | 94557305 | 39S ribosomal protein L19, mitochondrial [Homo sapiens]                        |
| 1.19E+08 | protein diaphanous homolog 1 isoform 1 [Homo sapiens]                          | 1.19E+08 | protein diaphanous homolog 1 isoform 1 [Homo sapiens]                          | 94721241 | isoleucine--tRNA ligase, cytoplasmic [Homo sapiens]                            | 94721241 | isoleucine--tRNA ligase, cytoplasmic [Homo sapiens]                            |
| 1.23E+08 | USP6 N-terminal-like protein isoform 2 [Homo sapiens]                          | 1.23E+08 | USP6 N-terminal-like protein isoform 2 [Homo sapiens]                          | 1.11E+08 | 182 kDa tankyrase-1-binding protein [Homo sapiens]                             | 1.11E+08 | 182 kDa tankyrase-1-binding protein [Homo sapiens]                             |
| 1.24E+08 | protein transport protein Sec16A isoform 1 [Homo sapiens]                      | 1.24E+08 | protein transport protein Sec16A isoform 1 [Homo sapiens]                      | 1.11E+08 | collagen alpha-1(XVIII) chain isoform 1 precursor [Homo sapiens]               | 1.11E+08 | collagen alpha-1(XVIII) chain isoform 1 precursor [Homo sapiens]               |
| 1.26E+08 | keratin, type II cytoskeletal 80 isoform K80 [Homo sapiens]                    | 1.26E+08 | keratin, type II cytoskeletal 80 isoform K80 [Homo sapiens]                    | 1.12E+08 | spindlin-1 [Homo sapiens]                                                      | 1.12E+08 | spindlin-1 [Homo sapiens]                                                      |
| 1.26E+08 | E3 ubiquitin-protein ligase HERC2 [Homo sapiens]                               | 1.26E+08 | E3 ubiquitin-protein ligase HERC2 [Homo sapiens]                               | 1.12E+08 | synemin isoform A [Homo sapiens]                                               | 1.12E+08 | synemin isoform A [Homo sapiens]                                               |
| 1.26E+08 | abnormal spindle-like microcephaly-associated protein isoform 1 [Homo sapiens] | 1.26E+08 | abnormal spindle-like microcephaly-associated protein isoform 1 [Homo sapiens] | 1.17E+08 | heterogeneous nuclear ribonucleoproteins C1/C2 isoform a [Homo sapiens]        | 1.17E+08 | heterogeneous nuclear ribonucleoproteins C1/C2 isoform a [Homo sapiens]        |
| 1.34E+08 | pericentriolar material 1 protein [Homo sapiens]                               | 1.34E+08 | pericentriolar material 1 protein [Homo sapiens]                               | 1.19E+08 | lysosomal protective protein isoform a precursor [Homo sapiens]                | 1.19E+08 | lysosomal protective protein isoform a precursor [Homo sapiens]                |
| 1.34E+08 | melanotransferrin isoform 1 precursor [Homo sapiens]                           | 1.34E+08 | melanotransferrin isoform 1 precursor [Homo sapiens]                           | 1.19E+08 | protein diaphanous homolog 1 isoform 1 [Homo sapiens]                          | 1.19E+08 | protein diaphanous homolog 1 isoform 1 [Homo sapiens]                          |
| 1.49E+08 | coatomer subunit alpha isoform 1 [Homo sapiens]                                | 1.49E+08 | coatomer subunit alpha isoform 1 [Homo sapiens]                                | 1.21E+08 | WASH complex subunit strumpellin [Homo sapiens]                                | 1.21E+08 | WASH complex subunit strumpellin [Homo sapiens]                                |
| 1.49E+08 | nexilin isoform 1 [Homo sapiens]                                               | 1.49E+08 | nexilin isoform 1 [Homo sapiens]                                               | 1.23E+08 | gap junction gamma-1 protein [Homo sapiens]                                    | 1.23E+08 | gap junction gamma-1 protein [Homo sapiens]                                    |
| 1.54E+08 | unconventional myosin-Vc [Homo sapiens]                                        | 1.54E+08 | unconventional myosin-Vc [Homo sapiens]                                        | 1.26E+08 | keratin, type II cytoskeletal 80 isoform K80 [Homo sapiens]                    | 1.26E+08 | keratin, type II cytoskeletal 80 isoform K80 [Homo sapiens]                    |
| 1.54E+08 | microtubule-associated protein 1B [Homo sapiens]                               | 1.54E+08 | microtubule-associated protein 1B [Homo sapiens]                               | 1.26E+08 | abnormal spindle-like microcephaly-associated protein isoform 1 [Homo sapiens] | 1.26E+08 | abnormal spindle-like microcephaly-associated protein isoform 1 [Homo sapiens] |

|          |                                                                                             |          |                                                                                             |          |                                                                          |          |                                                                          |
|----------|---------------------------------------------------------------------------------------------|----------|---------------------------------------------------------------------------------------------|----------|--------------------------------------------------------------------------|----------|--------------------------------------------------------------------------|
| 1.54E+08 | tenascin precursor [Homo sapiens]                                                           | 1.54E+08 | tenascin precursor [Homo sapiens]                                                           | 1.34E+08 | arginine and glutamate-rich protein 1 [Homo sapiens]                     | 1.34E+08 | arginine and glutamate-rich protein 1 [Homo sapiens]                     |
| 1.54E+08 | unconventional myosin-X [Homo sapiens]                                                      | 1.54E+08 | unconventional myosin-X [Homo sapiens]                                                      | 1.49E+08 | coatamer subunit alpha isoform 1 [Homo sapiens]                          | 1.49E+08 | coatamer subunit alpha isoform 1 [Homo sapiens]                          |
| 1.55E+08 | protein arginine N-methyltransferase 1 isoform 1 [Homo sapiens]                             | 1.55E+08 | protein arginine N-methyltransferase 1 isoform 1 [Homo sapiens]                             | 1.49E+08 | interferon-induced transmembrane protein 3 [Homo sapiens]                | 1.49E+08 | interferon-induced transmembrane protein 3 [Homo sapiens]                |
| 1.56E+08 | probable U3 small nucleolar RNA-associated protein 11 [Homo sapiens]                        | 1.56E+08 | probable U3 small nucleolar RNA-associated protein 11 [Homo sapiens]                        | 1.49E+08 | nexilin isoform 1 [Homo sapiens]                                         | 1.49E+08 | nexilin isoform 1 [Homo sapiens]                                         |
| 1.57E+08 | poly [ADP-ribose] polymerase 1 [Homo sapiens]                                               | 1.57E+08 | poly [ADP-ribose] polymerase 1 [Homo sapiens]                                               | 1.5E+08  | FK506-binding protein 15 [Homo sapiens]                                  | 1.5E+08  | FK506-binding protein 15 [Homo sapiens]                                  |
| 1.57E+08 | RNA 3'-terminal phosphate cyclase-like protein [Homo sapiens]                               | 1.57E+08 | RNA 3'-terminal phosphate cyclase-like protein [Homo sapiens]                               | 1.53E+08 | mitochondrial fission regulator 1-like isoform a [Homo sapiens]          | 1.53E+08 | mitochondrial fission regulator 1-like isoform a [Homo sapiens]          |
| 1.57E+08 | dedicator of cytokinesis protein 6 [Homo sapiens]                                           | 1.57E+08 | dedicator of cytokinesis protein 6 [Homo sapiens]                                           | 1.54E+08 | eukaryotic translation initiation factor 3 subunit C [Homo sapiens]      | 1.54E+08 | eukaryotic translation initiation factor 3 subunit C [Homo sapiens]      |
| 1.58E+08 | adenylyl cyclase-associated protein 1 [Homo sapiens]                                        | 1.58E+08 | adenylyl cyclase-associated protein 1 [Homo sapiens]                                        | 1.54E+08 | unconventional myosin-Vc [Homo sapiens]                                  | 1.54E+08 | unconventional myosin-Vc [Homo sapiens]                                  |
| 1.58E+08 | phosphatidylinositol 4-phosphate 3-kinase C2 domain-containing subunit alpha [Homo sapiens] | 1.58E+08 | phosphatidylinositol 4-phosphate 3-kinase C2 domain-containing subunit alpha [Homo sapiens] | 1.54E+08 | microtubule-associated protein 1B [Homo sapiens]                         | 1.54E+08 | microtubule-associated protein 1B [Homo sapiens]                         |
| 1.58E+08 | tensin-4 precursor [Homo sapiens]                                                           | 1.58E+08 | tensin-4 precursor [Homo sapiens]                                                           | 1.54E+08 | unconventional myosin-X [Homo sapiens]                                   | 1.54E+08 | unconventional myosin-X [Homo sapiens]                                   |
| 1.58E+08 | chromodomain-helicase-DNA-binding protein 3 isoform 3 [Homo sapiens]                        | 1.58E+08 | chromodomain-helicase-DNA-binding protein 3 isoform 3 [Homo sapiens]                        | 1.55E+08 | protein arginine N-methyltransferase 1 isoform 1 [Homo sapiens]          | 1.55E+08 | protein arginine N-methyltransferase 1 isoform 1 [Homo sapiens]          |
| 1.66E+08 | kin of IRRE-like protein 1 precursor [Homo sapiens]                                         | 1.66E+08 | kin of IRRE-like protein 1 precursor [Homo sapiens]                                         | 1.57E+08 | poly [ADP-ribose] polymerase 1 [Homo sapiens]                            | 1.57E+08 | poly [ADP-ribose] polymerase 1 [Homo sapiens]                            |
| 1.67E+08 | glypican-1 precursor [Homo sapiens]                                                         | 1.67E+08 | glypican-1 precursor [Homo sapiens]                                                         | 1.57E+08 | calpain-2 catalytic subunit isoform 1 [Homo sapiens]                     | 1.57E+08 | calpain-2 catalytic subunit isoform 1 [Homo sapiens]                     |
| 1.68E+08 | lactadherin isoform a preproprotein [Homo sapiens]                                          | 1.68E+08 | lactadherin isoform a preproprotein [Homo sapiens]                                          | 1.57E+08 | dedicator of cytokinesis protein 6 [Homo sapiens]                        | 1.57E+08 | dedicator of cytokinesis protein 6 [Homo sapiens]                        |
| 1.88E+08 | CD59 glycoprotein preproprotein [Homo sapiens]                                              | 1.88E+08 | CD59 glycoprotein preproprotein [Homo sapiens]                                              | 1.58E+08 | 26S proteasome non-ATPase regulatory subunit 13 isoform 2 [Homo sapiens] | 1.58E+08 | 26S proteasome non-ATPase regulatory subunit 13 isoform 2 [Homo sapiens] |

|          |                                                                                |          |                                                                                |          |                                                                            |          |                                                                            |
|----------|--------------------------------------------------------------------------------|----------|--------------------------------------------------------------------------------|----------|----------------------------------------------------------------------------|----------|----------------------------------------------------------------------------|
| 1.89E+08 | gelsolin isoform b [Homo sapiens]                                              | 1.89E+08 | gelsolin isoform b [Homo sapiens]                                              | 1.58E+08 | adenylyl cyclase-associated protein 1 [Homo sapiens]                       | 1.58E+08 | adenylyl cyclase-associated protein 1 [Homo sapiens]                       |
| 1.93E+08 | MAP/microtubule affinity-regulating kinase 3 isoform a [Homo sapiens]          | 1.93E+08 | MAP/microtubule affinity-regulating kinase 3 isoform a [Homo sapiens]          | 1.58E+08 | tensin-4 precursor [Homo sapiens]                                          | 1.58E+08 | tensin-4 precursor [Homo sapiens]                                          |
| 1.94E+08 | lysine--tRNA ligase isoform 1 [Homo sapiens]                                   | 1.94E+08 | lysine--tRNA ligase isoform 1 [Homo sapiens]                                   | 1.58E+08 | FYVE and coiled-coil domain-containing protein 1 [Homo sapiens]            | 1.58E+08 | FYVE and coiled-coil domain-containing protein 1 [Homo sapiens]            |
| 1.96E+08 | SUN domain-containing protein 1 isoform a [Homo sapiens]                       | 1.96E+08 | SUN domain-containing protein 1 isoform a [Homo sapiens]                       | 1.66E+08 | kin of IRRE-like protein 1 precursor [Homo sapiens]                        | 1.66E+08 | kin of IRRE-like protein 1 precursor [Homo sapiens]                        |
| 1.97E+08 | pleckstrin homology-like domain family B member 2 isoform a [Homo sapiens]     | 1.97E+08 | pleckstrin homology-like domain family B member 2 isoform a [Homo sapiens]     | 1.67E+08 | glypican-1 precursor [Homo sapiens]                                        | 1.67E+08 | glypican-1 precursor [Homo sapiens]                                        |
| 1.97E+08 | actin filament-associated protein 1 isoform A [Homo sapiens]                   | 1.97E+08 | actin filament-associated protein 1 isoform A [Homo sapiens]                   | 1.68E+08 | lactadherin isoform a preproprotein [Homo sapiens]                         | 1.68E+08 | lactadherin isoform a preproprotein [Homo sapiens]                         |
| 2.03E+08 | rho GTPase-activating protein 21 [Homo sapiens]                                | 2.03E+08 | rho GTPase-activating protein 21 [Homo sapiens]                                | 1.69E+08 | BTB/POZ domain-containing protein KCTD17 [Homo sapiens]                    | 1.69E+08 | BTB/POZ domain-containing protein KCTD17 [Homo sapiens]                    |
| 2.08E+08 | dynactin subunit 4 isoform a [Homo sapiens]                                    | 2.08E+08 | dynactin subunit 4 isoform a [Homo sapiens]                                    | 1.72E+08 | drebrin-like protein isoform c [Homo sapiens]                              | 1.72E+08 | drebrin-like protein isoform c [Homo sapiens]                              |
| 2.09E+08 | target of Myb protein 1 isoform 2 [Homo sapiens]                               | 2.09E+08 | target of Myb protein 1 isoform 2 [Homo sapiens]                               | 1.88E+08 | CD59 glycoprotein preproprotein [Homo sapiens]                             | 1.88E+08 | CD59 glycoprotein preproprotein [Homo sapiens]                             |
| 2.1E+08  | trifunctional purine biosynthetic protein adenosine-3 isoform 1 [Homo sapiens] | 2.1E+08  | trifunctional purine biosynthetic protein adenosine-3 isoform 1 [Homo sapiens] | 1.88E+08 | RNA-binding protein 28 isoform 1 [Homo sapiens]                            | 1.88E+08 | RNA-binding protein 28 isoform 1 [Homo sapiens]                            |
| 2.14E+08 | actin, aortic smooth muscle [Homo sapiens]                                     | 2.14E+08 | actin, aortic smooth muscle [Homo sapiens]                                     | 1.89E+08 | gelsolin isoform b [Homo sapiens]                                          | 1.89E+08 | gelsolin isoform b [Homo sapiens]                                          |
| 2.17E+08 | leucine zipper protein 1 [Homo sapiens]                                        | 2.17E+08 | leucine zipper protein 1 [Homo sapiens]                                        | 1.89E+08 | maspardin isoform a [Homo sapiens]                                         | 1.89E+08 | maspardin isoform a [Homo sapiens]                                         |
| 2.21E+08 | bullous pemphigoid antigen 1 isoform 2 [Homo sapiens]                          | 2.21E+08 | bullous pemphigoid antigen 1 isoform 2 [Homo sapiens]                          | 1.94E+08 | V-type proton ATPase 116 kDa subunit a isoform 1 isoform a [Homo sapiens]  | 1.94E+08 | V-type proton ATPase 116 kDa subunit a isoform 1 isoform a [Homo sapiens]  |
| 2.23E+08 | talin-1 [Homo sapiens]                                                         | 2.23E+08 | talin-1 [Homo sapiens]                                                         | 1.94E+08 | lysine--tRNA ligase isoform 1 [Homo sapiens]                               | 1.94E+08 | lysine--tRNA ligase isoform 1 [Homo sapiens]                               |
| 2.24E+08 | tropomyosin alpha-4 chain isoform 1 [Homo sapiens]                             | 2.24E+08 | tropomyosin alpha-4 chain isoform 1 [Homo sapiens]                             | 1.96E+08 | SUN domain-containing protein 1 isoform a [Homo sapiens]                   | 1.96E+08 | SUN domain-containing protein 1 isoform a [Homo sapiens]                   |
| 2.24E+08 | uncharacterized protein KIAA1671 [Homo sapiens]                                | 2.24E+08 | uncharacterized protein KIAA1671 [Homo sapiens]                                | 1.97E+08 | pleckstrin homology-like domain family B member 2 isoform a [Homo sapiens] | 1.97E+08 | pleckstrin homology-like domain family B member 2 isoform a [Homo sapiens] |

|          |                                                                                                              |          |                                                                                                              |          |                                                                                |          |                                                                                |
|----------|--------------------------------------------------------------------------------------------------------------|----------|--------------------------------------------------------------------------------------------------------------|----------|--------------------------------------------------------------------------------|----------|--------------------------------------------------------------------------------|
| 2.38E+08 | probable rRNA-processing protein EBP2 isoform 1 [Homo sapiens]                                               | 2.38E+08 | probable rRNA-processing protein EBP2 isoform 1 [Homo sapiens]                                               | 1.97E+08 | actin filament-associated protein 1 isoform A [Homo sapiens]                   | 1.97E+08 | actin filament-associated protein 1 isoform A [Homo sapiens]                   |
| 2.39E+08 | protein phosphatase Slingshot homolog 1 isoform 1 [Homo sapiens]                                             | 2.39E+08 | protein phosphatase Slingshot homolog 1 isoform 1 [Homo sapiens]                                             | 2.08E+08 | dynactin subunit 4 isoform a [Homo sapiens]                                    | 2.08E+08 | dynactin subunit 4 isoform a [Homo sapiens]                                    |
| 2.42E+08 | programmed cell death 6-interacting protein isoform 2 [Homo sapiens]                                         | 2.42E+08 | programmed cell death 6-interacting protein isoform 2 [Homo sapiens]                                         | 2.1E+08  | plastin-3 isoform 1 [Homo sapiens]                                             | 2.1E+08  | plastin-3 isoform 1 [Homo sapiens]                                             |
| 2.54E+08 | rho guanine nucleotide exchange factor 2 isoform 1 [Homo sapiens]                                            | 2.54E+08 | rho guanine nucleotide exchange factor 2 isoform 1 [Homo sapiens]                                            | 2.1E+08  | trifunctional purine biosynthetic protein adenosine-3 isoform 1 [Homo sapiens] | 2.1E+08  | trifunctional purine biosynthetic protein adenosine-3 isoform 1 [Homo sapiens] |
| 2.54E+08 | serine/threonine-protein kinase MARK2 isoform d [Homo sapiens]                                               | 2.54E+08 | serine/threonine-protein kinase MARK2 isoform d [Homo sapiens]                                               | 2.14E+08 | actin, aortic smooth muscle [Homo sapiens]                                     | 2.14E+08 | actin, aortic smooth muscle [Homo sapiens]                                     |
| 2.55E+08 | unconventional myosin-XIX isoform 2 [Homo sapiens]                                                           | 2.55E+08 | unconventional myosin-XIX isoform 2 [Homo sapiens]                                                           | 2.17E+08 | leucine zipper protein 1 [Homo sapiens]                                        | 2.17E+08 | leucine zipper protein 1 [Homo sapiens]                                        |
| 2.56E+08 | leucine-rich repeat and calponin homology domain-containing protein 1 isoform 1 [Homo sapiens]               | 2.56E+08 | leucine-rich repeat and calponin homology domain-containing protein 1 isoform 1 [Homo sapiens]               | 2.2E+08  | eukaryotic translation initiation factor 5A-1 isoform A [Homo sapiens]         | 2.2E+08  | eukaryotic translation initiation factor 5A-1 isoform A [Homo sapiens]         |
| 2.97E+08 | rho GDP-dissociation inhibitor 1 isoform a [Homo sapiens]                                                    | 2.97E+08 | rho GDP-dissociation inhibitor 1 isoform a [Homo sapiens]                                                    | 2.21E+08 | bullous pemphigoid antigen 1 isoform 2 [Homo sapiens]                          | 2.21E+08 | bullous pemphigoid antigen 1 isoform 2 [Homo sapiens]                          |
| 3.07E+08 | spectrin alpha chain, non-erythrocytic 1 isoform 3 [Homo sapiens]                                            | 3.07E+08 | spectrin alpha chain, non-erythrocytic 1 isoform 3 [Homo sapiens]                                            | 2.22E+08 | C-1-tetrahydrofolate synthase, cytoplasmic [Homo sapiens]                      | 2.22E+08 | C-1-tetrahydrofolate synthase, cytoplasmic [Homo sapiens]                      |
| 3.07E+08 | clathrin interactor 1 isoform 1 [Homo sapiens]                                                               | 3.07E+08 | clathrin interactor 1 isoform 1 [Homo sapiens]                                                               | 2.23E+08 | talin-1 [Homo sapiens]                                                         | 2.23E+08 | talin-1 [Homo sapiens]                                                         |
| 3.08E+08 | taperin [Homo sapiens]                                                                                       | 3.08E+08 | taperin [Homo sapiens]                                                                                       | 2.24E+08 | tropomyosin alpha-4 chain isoform 1 [Homo sapiens]                             | 2.24E+08 | tropomyosin alpha-4 chain isoform 1 [Homo sapiens]                             |
| 3.12E+08 | eukaryotic translation initiation factor 4 gamma 3 isoform 1 [Homo sapiens]                                  | 3.12E+08 | eukaryotic translation initiation factor 4 gamma 3 isoform 1 [Homo sapiens]                                  | 2.24E+08 | uncharacterized protein KIAA1671 [Homo sapiens]                                | 2.24E+08 | uncharacterized protein KIAA1671 [Homo sapiens]                                |
| 3.24E+08 | protein FAM101A [Homo sapiens]                                                                               | 3.24E+08 | protein FAM101A [Homo sapiens]                                                                               | 2.25E+08 | mitochondrial fission regulator 1 isoform 1 [Homo sapiens]                     | 2.25E+08 | mitochondrial fission regulator 1 isoform 1 [Homo sapiens]                     |
| 3.26E+08 | SWI/SNF-related matrix-associated actin-dependent regulator of chromatin subfamily A member 5 [Homo sapiens] | 3.26E+08 | SWI/SNF-related matrix-associated actin-dependent regulator of chromatin subfamily A member 5 [Homo sapiens] | 2.39E+08 | protein phosphatase Slingshot homolog 1 isoform 1 [Homo sapiens]               | 2.39E+08 | protein phosphatase Slingshot homolog 1 isoform 1 [Homo sapiens]               |
| 3.32E+08 | keratin, type II cytoskeletal 4 [Homo sapiens]                                                               | 3.32E+08 | keratin, type II cytoskeletal 4 [Homo sapiens]                                                               | 2.42E+08 | programmed cell death 6-interacting protein isoform 2 [Homo sapiens]           | 2.42E+08 | programmed cell death 6-interacting protein isoform 2 [Homo sapiens]           |



|          |                                                                                  |          |                                                                                  |          |                                                                                    |          |                                                                                    |
|----------|----------------------------------------------------------------------------------|----------|----------------------------------------------------------------------------------|----------|------------------------------------------------------------------------------------|----------|------------------------------------------------------------------------------------|
| 3.33E+08 | smoothelin isoform d [Homo sapiens]                                              | 3.33E+08 | smoothelin isoform d [Homo sapiens]                                              | 2.54E+08 | rho guanine nucleotide exchange factor 2 isoform 1 [Homo sapiens]                  | 2.54E+08 | rho guanine nucleotide exchange factor 2 isoform 1 [Homo sapiens]                  |
| 3.39E+08 | AP-2 complex subunit alpha-2 isoform 1 [Homo sapiens]                            | 3.39E+08 | AP-2 complex subunit alpha-2 isoform 1 [Homo sapiens]                            | 2.55E+08 | unconventional myosin-XIX isoform 2 [Homo sapiens]                                 | 2.55E+08 | unconventional myosin-XIX isoform 2 [Homo sapiens]                                 |
| 3.43E+08 | cytospin-B isoform 1 [Homo sapiens]                                              | 3.43E+08 | cytospin-B isoform 1 [Homo sapiens]                                              | 2.56E+08 | WD repeat-containing protein 81 isoform 1 [Homo sapiens]                           | 2.56E+08 | WD repeat-containing protein 81 isoform 1 [Homo sapiens]                           |
| 3.55E+08 | ras-related protein Rab-5C isoform b [Homo sapiens]                              | 3.55E+08 | ras-related protein Rab-5C isoform b [Homo sapiens]                              | 2.6E+08  | L-lactate dehydrogenase A chain isoform 3 [Homo sapiens]                           | 2.6E+08  | L-lactate dehydrogenase A chain isoform 3 [Homo sapiens]                           |
| 3.55E+08 | protein scribble homolog isoform a [Homo sapiens]                                | 3.55E+08 | protein scribble homolog isoform a [Homo sapiens]                                | 2.82E+08 | serine/threonine-protein phosphatase PGAM5, mitochondrial isoform 2 [Homo sapiens] | 2.82E+08 | serine/threonine-protein phosphatase PGAM5, mitochondrial isoform 2 [Homo sapiens] |
| 3.59E+08 | protein LAP2 isoform 8 [Homo sapiens]                                            | 3.59E+08 | protein LAP2 isoform 8 [Homo sapiens]                                            | 2.9E+08  | eukaryotic translation initiation factor 4 gamma 2 isoform 1 [Homo sapiens]        | 2.9E+08  | eukaryotic translation initiation factor 4 gamma 2 isoform 1 [Homo sapiens]        |
| 3.67E+08 | myosin-10 isoform 2 [Homo sapiens]                                               | 3.67E+08 | myosin-10 isoform 2 [Homo sapiens]                                               | 2.97E+08 | rho GDP-dissociation inhibitor 1 isoform a [Homo sapiens]                          | 2.97E+08 | rho GDP-dissociation inhibitor 1 isoform a [Homo sapiens]                          |
| 3.74E+08 | pleckstrin homology domain-containing family A member 5 isoform 4 [Homo sapiens] | 3.74E+08 | pleckstrin homology domain-containing family A member 5 isoform 4 [Homo sapiens] | 3.05E+08 | UPF0505 protein C16orf62 [Homo sapiens]                                            | 3.05E+08 | UPF0505 protein C16orf62 [Homo sapiens]                                            |
| 3.88E+08 | lamin-B2 [Homo sapiens]                                                          | 3.88E+08 | lamin-B2 [Homo sapiens]                                                          | 3.07E+08 | clathrin interactor 1 isoform 1 [Homo sapiens]                                     | 3.07E+08 | clathrin interactor 1 isoform 1 [Homo sapiens]                                     |
| 3.9E+08  | sentrin-specific protease 1 [Homo sapiens]                                       | 3.9E+08  | sentrin-specific protease 1 [Homo sapiens]                                       | 3.08E+08 | taperin [Homo sapiens]                                                             | 3.08E+08 | taperin [Homo sapiens]                                                             |
| 3.95E+08 | 26S proteasome non-ATPase regulatory subunit 11 [Homo sapiens]                   | 3.95E+08 | 26S proteasome non-ATPase regulatory subunit 11 [Homo sapiens]                   | 3.24E+08 | protein FAM101A [Homo sapiens]                                                     | 3.24E+08 | protein FAM101A [Homo sapiens]                                                     |
| 4.29E+08 | CUE domain-containing protein 1 [Homo sapiens]                                   | 4.29E+08 | CUE domain-containing protein 1 [Homo sapiens]                                   | 3.32E+08 | keratin, type II cytoskeletal 4 [Homo sapiens]                                     | 3.32E+08 | keratin, type II cytoskeletal 4 [Homo sapiens]                                     |
| 4.32E+08 | dedicator of cytokinesis protein 7 isoform 1 [Homo sapiens]                      | 4.32E+08 | dedicator of cytokinesis protein 7 isoform 1 [Homo sapiens]                      | 3.43E+08 | cytospin-B isoform 1 [Homo sapiens]                                                | 3.43E+08 | cytospin-B isoform 1 [Homo sapiens]                                                |
| 4.76E+08 | POTE ankyrin domain family member I [Homo sapiens]                               | 4.76E+08 | POTE ankyrin domain family member I [Homo sapiens]                               | 3.55E+08 | ras-related protein Rab-5C isoform b [Homo sapiens]                                | 3.55E+08 | ras-related protein Rab-5C isoform b [Homo sapiens]                                |
|          |                                                                                  |          |                                                                                  | 3.55E+08 | protein scribble homolog isoform a [Homo sapiens]                                  | 3.55E+08 | protein scribble homolog isoform a [Homo sapiens]                                  |
|          |                                                                                  |          |                                                                                  | 3.59E+08 | protein LAP2 isoform 8 [Homo sapiens]                                              | 3.59E+08 | protein LAP2 isoform 8 [Homo sapiens]                                              |

|  |  |  |  |          |                                                                      |          |                                                                      |
|--|--|--|--|----------|----------------------------------------------------------------------|----------|----------------------------------------------------------------------|
|  |  |  |  | 3.67E+08 | myosin-10 isoform 2 [Homo sapiens]                                   | 3.67E+08 | myosin-10 isoform 2 [Homo sapiens]                                   |
|  |  |  |  | 3.84E+08 | transketolase isoform 2 [Homo sapiens]                               | 3.84E+08 | transketolase isoform 2 [Homo sapiens]                               |
|  |  |  |  | 3.87E+08 | radixin isoform 1 [Homo sapiens]                                     | 3.87E+08 | radixin isoform 1 [Homo sapiens]                                     |
|  |  |  |  | 3.88E+08 | structural maintenance of chromosomes protein 2 [Homo sapiens]       | 3.88E+08 | structural maintenance of chromosomes protein 2 [Homo sapiens]       |
|  |  |  |  | 3.94E+08 | actin-related protein 2/3 complex subunit 5 isoform 2 [Homo sapiens] | 3.94E+08 | actin-related protein 2/3 complex subunit 5 isoform 2 [Homo sapiens] |
|  |  |  |  | 3.95E+08 | 26S proteasome non-ATPase regulatory subunit 11 [Homo sapiens]       | 3.95E+08 | 26S proteasome non-ATPase regulatory subunit 11 [Homo sapiens]       |
|  |  |  |  | 4.1E+08  | PREDICTED: nucleoside diphosphate kinase B-like [Homo sapiens]       | 4.1E+08  | PREDICTED: nucleoside diphosphate kinase B-like [Homo sapiens]       |
|  |  |  |  | 4.29E+08 | CUE domain-containing protein 1 [Homo sapiens]                       | 4.29E+08 | CUE domain-containing protein 1 [Homo sapiens]                       |
|  |  |  |  | 4.7E+08  | transgelin-2 isoform a [Homo sapiens]                                | 4.7E+08  | transgelin-2 isoform a [Homo sapiens]                                |

**Table S6. Geneset enrichment of SMO binding proteins in ONS76 cells expressing SMO<sup>WT</sup> or SMO<sup>W535L</sup> with treatment of LDE225 or DMSO.**

| SMO <sup>WT</sup> +DMSO |                                            |       |            |             |                 | SMO <sup>WT</sup> +LDE225 |                                        |       |             |             |                 |
|-------------------------|--------------------------------------------|-------|------------|-------------|-----------------|---------------------------|----------------------------------------|-------|-------------|-------------|-----------------|
| Category                | Term                                       | Count | %          | PValue      | Fold Enrichment | Category                  | Term                                   | Count | %           | PValue      | Fold Enrichment |
| GOTERM_BP_DIRECT        | GO:0000387~spliceosomal snRNP assembly     | 3     | 11.1111111 | 0.000663821 | 74.96428571     | GOTERM_BP_DIRECT          | GO:0098609~cell-cell adhesion          | 6     | 16.21621622 | 2.00E-04    | 10.62224565     |
| GOTERM_BP_DIRECT        | GO:0035246~peptidyl-arginine N-methylation | 2     | 7.4074074  | 0.005468041 | 349.8333333     | GOTERM_BP_DIRECT          | GO:0000387~spliceosomal snRNP assembly | 3     | 8.108108108 | 0.001455359 | 51.40408163     |
| GOTERM_BP_DIRECT        | GO:0018216~peptidyl-arginine methylation   | 2     | 7.4074074  | 0.005468041 | 349.8333333     | GOTERM_BP_DIRECT          | GO:0016032~viral process               | 5     | 13.51351351 | 0.002999415 | 8.022933588     |

|                      |                                                                        |   |                 |                 |                 |                      |                                                                                               |   |                 |                 |                 |
|----------------------|------------------------------------------------------------------------|---|-----------------|-----------------|-----------------|----------------------|-----------------------------------------------------------------------------------------------|---|-----------------|-----------------|-----------------|
| GOTERM_B<br>P_DIRECT | GO:0098609--cell-cell adhesion                                         | 4 | 14.814<br>81481 | 0.0057<br>9739  | 10.3271<br>8327 | GOTERM_B<br>P_DIRECT | GO:0018216--peptidyl-arginine methylation                                                     | 2 | 5.4054<br>05405 | 0.0080<br>75249 | 239.885<br>7143 |
| GOTERM_B<br>P_DIRECT | GO:0043985--histone H4-R3 methylation                                  | 2 | 7.4074<br>07407 | 0.0081<br>91325 | 233.222<br>2222 | GOTERM_B<br>P_DIRECT | GO:0035246--peptidyl-arginine N-methylation                                                   | 2 | 5.4054<br>05405 | 0.0080<br>75249 | 239.885<br>7143 |
| GOTERM_B<br>P_DIRECT | GO:0001649--osteoblast differentiation                                 | 3 | 11.111<br>11111 | 0.0088<br>30255 | 20.1826<br>9231 | GOTERM_B<br>P_DIRECT | GO:0000056--ribosomal small subunit export from nucleus                                       | 2 | 5.4054<br>05405 | 0.0100<br>84151 | 191.908<br>5714 |
| GOTERM_B<br>P_DIRECT | GO:0032211--negative regulation of telomere maintenance via telomerase | 2 | 7.4074<br>07407 | 0.0163<br>18446 | 116.611<br>1111 | GOTERM_B<br>P_DIRECT | GO:0043985--histone H4-R3 methylation                                                         | 2 | 5.4054<br>05405 | 0.0120<br>89103 | 159.923<br>8095 |
| GOTERM_B<br>P_DIRECT | GO:0000028--ribosomal small subunit assembly                           | 2 | 7.4074<br>07407 | 0.0257<br>19583 | 73.6491<br>2281 | GOTERM_B<br>P_DIRECT | GO:0019886--antigen processing and presentation of exogenous peptide antigen via MHC class II | 3 | 8.1081<br>08108 | 0.0148<br>65378 | 15.6447<br>205  |
| GOTERM_B<br>P_DIRECT | GO:0006412--translation                                                | 3 | 11.111<br>11111 | 0.0464<br>77503 | 8.29644<br>2688 | GOTERM_B<br>P_DIRECT | GO:0006614--SRP-dependent cotranslational protein targeting to membrane                       | 3 | 8.1081<br>08108 | 0.0154<br>83351 | 15.3118<br>541  |
| GOTERM_B<br>P_DIRECT | GO:0030177--positive regulation of Wnt signaling pathway               | 2 | 7.4074<br>07407 | 0.0481<br>94457 | 38.8703<br>7037 | GOTERM_B<br>P_DIRECT | GO:0007097--nuclear migration                                                                 | 2 | 5.4054<br>05405 | 0.0180<br>80341 | 106.615<br>873  |
|                      |                                                                        |   |                 |                 |                 | GOTERM_B<br>P_DIRECT | GO:0019083--viral transcription                                                               | 3 | 8.1081<br>08108 | 0.0215<br>2653  | 12.8510<br>2041 |
|                      |                                                                        |   |                 |                 |                 | GOTERM_B<br>P_DIRECT | GO:0000184--nuclear-transcribed mRNA catabolic process, nonsense-mediated decay               | 3 | 8.1081<br>08108 | 0.0241<br>01749 | 12.0950<br>7803 |
|                      |                                                                        |   |                 |                 |                 | GOTERM_B<br>P_DIRECT | GO:0006413--translational initiation                                                          | 3 | 8.1081<br>08108 | 0.0312<br>67153 | 10.5059<br>4369 |
|                      |                                                                        |   |                 |                 |                 | GOTERM_B<br>P_DIRECT | GO:0051301--cell division                                                                     | 4 | 10.810<br>81081 | 0.0333<br>58876 | 5.48310<br>2041 |
|                      |                                                                        |   |                 |                 |                 | GOTERM_B<br>P_DIRECT | GO:0035904--aorta development                                                                 | 2 | 5.4054<br>05405 | 0.0358<br>4323  | 53.3079<br>3651 |
|                      |                                                                        |   |                 |                 |                 | GOTERM_B<br>P_DIRECT | GO:0000028--ribosomal small subunit assembly                                                  | 2 | 5.4054<br>05405 | 0.0377<br>97524 | 50.5022<br>5564 |
|                      |                                                                        |   |                 |                 |                 | GOTERM_B<br>P_DIRECT | GO:0006888--ER to Golgi vesicle-mediated transport                                            | 3 | 8.1081<br>08108 | 0.0414<br>8278  | 8.99571<br>4286 |
|                      |                                                                        |   |                 |                 |                 | GOTERM_B<br>P_DIRECT | GO:0060976--coronary vasculature development                                                  | 2 | 5.4054<br>05405 | 0.0494<br>42801 | 38.3817<br>1429 |
| SMOW535L<br>+DMSO    |                                                                        |   |                 |                 |                 | SMOWT+L<br>DE225     |                                                                                               |   |                 |                 |                 |

| Category             | Term                                                                                          | Co<br>unt | %               | PValu<br>e      | Fold<br>Enrichm<br>ent | Category             | Term                                                                                                                         | Co<br>unt | %               | PValu<br>e      | Fold<br>Enrichm<br>ent |
|----------------------|-----------------------------------------------------------------------------------------------|-----------|-----------------|-----------------|------------------------|----------------------|------------------------------------------------------------------------------------------------------------------------------|-----------|-----------------|-----------------|------------------------|
| GOTERM_B<br>P_DIRECT | GO:0098609--cell-cell adhesion                                                                | 25        | 10.683<br>76068 | 1.69E-<br>13    | 6.97782<br>6535        | GOTERM_B<br>P_DIRECT | GO:0098609--cell-cell adhesion                                                                                               | 38        | 15.322<br>58065 | 7.35E-<br>26    | 9.85187<br>3581        |
| GOTERM_B<br>P_DIRECT | GO:0006413--translational initiation                                                          | 14        | 5.9829<br>05983 | 3.17E-<br>08    | 7.72959<br>8211        | GOTERM_B<br>P_DIRECT | GO:0043161--proteasome-mediated ubiquitin-dependent protein catabolic process                                                | 16        | 6.4516<br>12903 | 0.0000<br>00208 | 5.53768<br>7821        |
| GOTERM_B<br>P_DIRECT | GO:0001731--formation of translation preinitiation complex                                    | 7         | 2.9914<br>52991 | 0.0000<br>00407 | 23.0207<br>5989        | GOTERM_B<br>P_DIRECT | GO:0031145--anaphase-promoting complex-dependent catabolic process                                                           | 10        | 4.0322<br>58065 | 0.0000<br>0172  | 8.89359<br>6737        |
| GOTERM_B<br>P_DIRECT | GO:0007010--cytoskeleton organization                                                         | 13        | 5.5555<br>55556 | 0.0000<br>0149  | 6.10754<br>8542        | GOTERM_B<br>P_DIRECT | GO:0030036--actin cytoskeleton organization                                                                                  | 12        | 4.8387<br>09677 | 0.0000<br>0243  | 6.48548<br>439         |
| GOTERM_B<br>P_DIRECT | GO:0006364--rRNA processing                                                                   | 14        | 5.9829<br>05983 | 0.0000<br>0533  | 4.94838<br>764         | GOTERM_B<br>P_DIRECT | GO:0051436--negative regulation of ubiquitin-protein ligase activity involved in mitotic cell cycle                          | 9         | 3.6290<br>32258 | 0.0000<br>0714  | 8.90612<br>293         |
| GOTERM_B<br>P_DIRECT | GO:0006446--regulation of translational initiation                                            | 7         | 2.9914<br>52991 | 0.0000<br>068   | 14.7077<br>0771        | GOTERM_B<br>P_DIRECT | GO:0051301--cell division                                                                                                    | 18        | 7.2580<br>64516 | 0.0000<br>109   | 3.61334<br>1303        |
| GOTERM_B<br>P_DIRECT | GO:0000226--microtubule cytoskeleton organization                                             | 8         | 3.4188<br>03419 | 0.0000<br>405   | 8.52277<br>6297        | GOTERM_B<br>P_DIRECT | GO:0034314--Arp2/3 complex-mediated actin nucleation                                                                         | 6         | 2.4193<br>54839 | 0.0000<br>119   | 19.1616<br>5843        |
| GOTERM_B<br>P_DIRECT | GO:0030036--actin cytoskeleton organization                                                   | 10        | 4.2735<br>04274 | 0.0000<br>559   | 5.81843<br>3818        | GOTERM_B<br>P_DIRECT | GO:0051437--positive regulation of ubiquitin-protein ligase activity involved in regulation of mitotic cell cycle transition | 9         | 3.6290<br>32258 | 0.0000<br>119   | 8.32019<br>379         |
| GOTERM_B<br>P_DIRECT | GO:0034314--Arp2/3 complex-mediated actin nucleation                                          | 5         | 2.1367<br>52137 | 0.0001<br>77    | 17.1908<br>2719        | GOTERM_B<br>P_DIRECT | GO:0016032--viral process                                                                                                    | 16        | 6.4516<br>12903 | 0.0000<br>249   | 3.75970<br>1096        |
| GOTERM_B<br>P_DIRECT | GO:0019886--antigen processing and presentation of exogenous peptide antigen via MHC class II | 8         | 3.4188<br>03419 | 0.0002<br>11    | 6.57735<br>9969        | GOTERM_B<br>P_DIRECT | GO:0060071--Wnt signaling pathway, planar cell polarity pathway                                                              | 9         | 3.6290<br>32258 | 0.0000<br>484   | 6.87320<br>3566        |
| GOTERM_B<br>P_DIRECT | GO:0051056--regulation of small GTPase mediated signal transduction                           | 9         | 3.8461<br>53846 | 0.0003<br>99    | 5.08027<br>4304        | GOTERM_B<br>P_DIRECT | GO:0006521--regulation of cellular amino acid metabolic process                                                              | 7         | 2.8225<br>80645 | 0.0000<br>804   | 9.64344<br>9011        |
| GOTERM_B<br>P_DIRECT | GO:0001649--osteoblast differentiation                                                        | 8         | 3.4188<br>03419 | 0.0004<br>48    | 5.81843<br>3818        | GOTERM_B<br>P_DIRECT | GO:0007010--cytoskeleton organization                                                                                        | 11        | 4.4354<br>83871 | 0.0001<br>01    | 4.80033<br>2649        |
| GOTERM_B<br>P_DIRECT | GO:0008360--regulation of cell shape                                                          | 9         | 3.8461<br>53846 | 0.0005<br>35    | 4.86254<br>8263        | GOTERM_B<br>P_DIRECT | GO:0043488--regulation of mRNA stability                                                                                     | 9         | 3.6290<br>32258 | 0.0001<br>08    | 6.13917<br>2117        |
| GOTERM_B<br>P_DIRECT | GO:0048268--clathrin coat assembly                                                            | 4         | 1.7094<br>01709 | 0.0005<br>83    | 23.2737<br>3527        | GOTERM_B<br>P_DIRECT | GO:0006413--translational initiation                                                                                         | 10        | 4.0322<br>58065 | 0.0001<br>47    | 5.12842<br>4396        |
| GOTERM_B<br>P_DIRECT | GO:0016032--viral process                                                                     | 13        | 5.5555<br>55556 | 0.0006<br>26    | 3.28867<br>9984        | GOTERM_B<br>P_DIRECT | GO:0007067--mitotic nuclear division                                                                                         | 13        | 5.2419<br>35484 | 0.0002<br>28    | 3.68295<br>3165        |

|                      |                                                                                |    |                 |                 |                 |                      |                                                                                                            |   |                 |                 |                 |
|----------------------|--------------------------------------------------------------------------------|----|-----------------|-----------------|-----------------|----------------------|------------------------------------------------------------------------------------------------------------|---|-----------------|-----------------|-----------------|
| GOTERM_B<br>P_DIRECT | GO:0021987~cerebral cortex development                                         | 6  | 2.5641<br>02564 | 0.0008<br>35    | 8.10424<br>7104 | GOTERM_B<br>P_DIRECT | GO:0002479~antigen processing and presentation of exogenous peptide antigen via MHC class I, TAP-dependent | 7 | 2.8225<br>80645 | 0.0002<br>63    | 7.80660<br>1581 |
| GOTERM_B<br>P_DIRECT | GO:0045104~intermediate filament cytoskeleton organization                     | 4  | 1.7094<br>01709 | 0.0009<br>1     | 20.1705<br>7057 | GOTERM_B<br>P_DIRECT | GO:0090263~positive regulation of canonical Wnt signaling pathway                                          | 9 | 3.6290<br>32258 | 0.0003<br>11    | 5.26945<br>6067 |
| GOTERM_B<br>P_DIRECT | GO:0006928~movement of cell or subcellular component                           | 7  | 2.9914<br>52991 | 0.0009<br>51    | 6.15671<br>4854 | GOTERM_B<br>P_DIRECT | GO:0019886~antigen processing and presentation of exogenous peptide antigen via MHC class II               | 8 | 3.2258<br>06452 | 0.0003<br>31    | 6.10951<br>4281 |
| GOTERM_B<br>P_DIRECT | GO:0007051~spindle organization                                                | 4  | 1.7094<br>01709 | 0.0011<br>0961  | 18.9099<br>0991 | GOTERM_B<br>P_DIRECT | GO:0038061~NIK/NF-kappaB signaling                                                                         | 7 | 2.8225<br>80645 | 0.0003<br>4     | 7.45175<br>6054 |
| GOTERM_B<br>P_DIRECT | GO:0030705~cytoskeleton-dependent intracellular transport                      | 4  | 1.7094<br>01709 | 0.0015<br>85782 | 16.8088<br>0881 | GOTERM_B<br>P_DIRECT | GO:0045104~intermediate filament cytoskeleton organization                                                 | 4 | 1.6129<br>03226 | 0.0011<br>27774 | 18.7358<br>4379 |
| GOTERM_B<br>P_DIRECT | GO:0075525~viral translational termination-reinitiation                        | 3  | 1.2820<br>51282 | 0.0016<br>79844 | 45.3837<br>8378 | GOTERM_B<br>P_DIRECT | GO:0021987~cerebral cortex development                                                                     | 6 | 2.4193<br>54839 | 0.0011<br>62949 | 7.52779<br>4381 |
| GOTERM_B<br>P_DIRECT | GO:0006418~tRNA aminoacylation for protein translation                         | 5  | 2.1367<br>52137 | 0.0018<br>40702 | 9.45495<br>4955 | GOTERM_B<br>P_DIRECT | GO:0006606~protein import into nucleus                                                                     | 6 | 2.4193<br>54839 | 0.0013<br>6345  | 7.26821<br>5265 |
| GOTERM_B<br>P_DIRECT | GO:0006412~translation                                                         | 11 | 4.7008<br>54701 | 0.0019<br>41856 | 3.28867<br>9984 | GOTERM_B<br>P_DIRECT | GO:0007051~spindle organization                                                                            | 4 | 1.6129<br>03226 | 0.0013<br>73575 | 17.5648<br>5356 |
| GOTERM_B<br>P_DIRECT | GO:0043547~positive regulation of GTPase activity                              | 17 | 7.2649<br>57265 | 0.0033<br>87928 | 2.27588<br>2963 | GOTERM_B<br>P_DIRECT | GO:0048013~ephrin receptor signaling pathway                                                               | 7 | 2.8225<br>80645 | 0.0013<br>91139 | 5.71878<br>953  |
| GOTERM_B<br>P_DIRECT | GO:0075522~IRES-dependent viral translational initiation                       | 3  | 1.2820<br>51282 | 0.0034<br>66813 | 32.4169<br>8842 | GOTERM_B<br>P_DIRECT | GO:0006928~movement of cell or subcellular component                                                       | 7 | 2.8225<br>80645 | 0.0013<br>91139 | 5.71878<br>953  |
| GOTERM_B<br>P_DIRECT | GO:0019083~viral transcription                                                 | 7  | 2.9914<br>52991 | 0.0036<br>50706 | 4.72747<br>7477 | GOTERM_B<br>P_DIRECT | GO:0006893~Golgi to plasma membrane transport                                                              | 4 | 1.6129<br>03226 | 0.0016<br>50555 | 16.5316<br>2688 |
| GOTERM_B<br>P_DIRECT | GO:0007018~microtubule-based movement                                          | 6  | 2.5641<br>02564 | 0.0042<br>99625 | 5.60293<br>627  | GOTERM_B<br>P_DIRECT | GO:0007043~cell-cell junction assembly                                                                     | 4 | 1.6129<br>03226 | 0.0019<br>60069 | 15.6132<br>0316 |
| GOTERM_B<br>P_DIRECT | GO:0000184~nuclear-transcribed mRNA catabolic process, nonsense-mediated decay | 7  | 2.9914<br>52991 | 0.0049<br>10192 | 4.44939<br>0567 | GOTERM_B<br>P_DIRECT | GO:0090090~negative regulation of canonical Wnt signaling pathway                                          | 9 | 3.6290<br>32258 | 0.0022<br>70892 | 3.87935<br>416  |
| GOTERM_B<br>P_DIRECT | GO:0006888~ER to Golgi vesicle-mediated transport                              | 8  | 3.4188<br>03419 | 0.0053<br>12433 | 3.78198<br>1982 | GOTERM_B<br>P_DIRECT | GO:0035338~long-chain fatty-acyl-CoA biosynthetic process                                                  | 5 | 2.0161<br>29032 | 0.0028<br>86946 | 8.36421<br>5979 |
| GOTERM_B<br>P_DIRECT | GO:0048013~ephrin receptor signaling pathway                                   | 6  | 2.5641<br>02564 | 0.0055<br>44378 | 5.27718<br>4161 | GOTERM_B<br>P_DIRECT | GO:0000226~microtubule cytoskeleton organization                                                           | 6 | 2.4193<br>54839 | 0.0033<br>39681 | 5.93741<br>5287 |
| GOTERM_B<br>P_DIRECT | GO:0000387~spliceosomal snRNP assembly                                         | 4  | 1.7094<br>01709 | 0.0057<br>79831 | 10.8056<br>6281 | GOTERM_B<br>P_DIRECT | GO:0001649~osteoblast differentiation                                                                      | 7 | 2.8225<br>80645 | 0.0036<br>38676 | 4.72899<br>9034 |

|                      |                                                                         |   |                 |                 |                 |                      |                                                                                                                          |    |                 |                 |                 |
|----------------------|-------------------------------------------------------------------------|---|-----------------|-----------------|-----------------|----------------------|--------------------------------------------------------------------------------------------------------------------------|----|-----------------|-----------------|-----------------|
| GOTERM_B<br>P_DIRECT | GO:0036498--IRE1-mediated unfolded protein response                     | 5 | 2.1367<br>52137 | 0.0075<br>51568 | 6.41013<br>8953 | GOTERM_B<br>P_DIRECT | GO:0002223--stimulatory C-type lectin receptor signaling pathway                                                         | 7  | 2.8225<br>80645 | 0.0038<br>14514 | 4.68396<br>0948 |
| GOTERM_B<br>P_DIRECT | GO:0006614--SRP-dependent cotranslational protein targeting to membrane | 6 | 2.5641<br>02564 | 0.0080<br>33775 | 4.82806<br>2105 | GOTERM_B<br>P_DIRECT | GO:0001731--formation of translation preinitiation complex                                                               | 4  | 1.6129<br>03226 | 0.0040<br>37824 | 12.2190<br>2856 |
| GOTERM_B<br>P_DIRECT | GO:0000902--cell morphogenesis                                          | 5 | 2.1367<br>52137 | 0.0089<br>78287 | 6.09997<br>0939 | GOTERM_B<br>P_DIRECT | GO:0006457--protein folding                                                                                              | 9  | 3.6290<br>32258 | 0.0041<br>58233 | 3.51297<br>0711 |
| GOTERM_B<br>P_DIRECT | GO:0016055--Wnt signaling pathway                                       | 8 | 3.4188<br>03419 | 0.0120<br>16478 | 3.23592<br>0412 | GOTERM_B<br>P_DIRECT | GO:1900034--regulation of cellular response to heat                                                                      | 6  | 2.4193<br>54839 | 0.0042<br>30021 | 5.62075<br>3138 |
| GOTERM_B<br>P_DIRECT | GO:0051693--actin filament capping                                      | 3 | 1.2820<br>51282 | 0.0122<br>24453 | 17.4553<br>0146 | GOTERM_B<br>P_DIRECT | GO:0008283--cell proliferation                                                                                           | 13 | 5.2419<br>35484 | 0.0061<br>24553 | 2.49555<br>2964 |
| GOTERM_B<br>P_DIRECT | GO:0006886--intracellular protein transport                             | 9 | 3.8461<br>53846 | 0.0130<br>79755 | 2.88456<br>2529 | GOTERM_B<br>P_DIRECT | GO:0033209--tumor necrosis factor-mediated signaling pathway                                                             | 7  | 2.8225<br>80645 | 0.0067<br>14821 | 4.16793<br>1352 |
| GOTERM_B<br>P_DIRECT | GO:0007015--actin filament organization                                 | 5 | 2.1367<br>52137 | 0.0149<br>64251 | 5.25275<br>2753 | GOTERM_B<br>P_DIRECT | GO:0007097--nuclear migration                                                                                            | 3  | 1.2096<br>77419 | 0.0067<br>44126 | 23.4198<br>0474 |
| GOTERM_B<br>P_DIRECT | GO:1900034--regulation of cellular response to heat                     | 5 | 2.1367<br>52137 | 0.0171<br>52224 | 5.04264<br>2643 | GOTERM_B<br>P_DIRECT | GO:0000184--nuclear-transcribed mRNA catabolic process, nonsense-mediated decay                                          | 7  | 2.8225<br>80645 | 0.0069<br>89795 | 4.13290<br>6719 |
| GOTERM_B<br>P_DIRECT | GO:0016925--protein sumoylation                                         | 6 | 2.5641<br>02564 | 0.0192<br>80061 | 3.87895<br>5879 | GOTERM_B<br>P_DIRECT | GO:0006888--ER to Golgi vesicle-mediated transport                                                                       | 8  | 3.2258<br>06452 | 0.0077<br>945   | 3.51297<br>0711 |
| GOTERM_B<br>P_DIRECT | GO:0090630--activation of GTPase activity                               | 5 | 2.1367<br>52137 | 0.0203<br>65783 | 4.78731<br>8965 | GOTERM_B<br>P_DIRECT | GO:0045792--negative regulation of cell size                                                                             | 3  | 1.2096<br>77419 | 0.0083<br>51794 | 21.0778<br>2427 |
| GOTERM_B<br>P_DIRECT | GO:0007043--cell-cell junction assembly                                 | 3 | 1.2820<br>51282 | 0.0229<br>68096 | 12.6066<br>0661 | GOTERM_B<br>P_DIRECT | GO:0051639--actin filament network formation                                                                             | 3  | 1.2096<br>77419 | 0.0083<br>51794 | 21.0778<br>2427 |
| GOTERM_B<br>P_DIRECT | GO:0035904--aorta development                                           | 3 | 1.2820<br>51282 | 0.0229<br>68096 | 12.6066<br>0661 | GOTERM_B<br>P_DIRECT | GO:1900740--positive regulation of protein insertion into mitochondrial membrane involved in apoptotic signaling pathway | 4  | 1.6129<br>03226 | 0.0086<br>07483 | 9.36792<br>1897 |
| GOTERM_B<br>P_DIRECT | GO:0051493--regulation of cytoskeleton organization                     | 3 | 1.2820<br>51282 | 0.0254<br>50819 | 11.9431<br>01   | GOTERM_B<br>P_DIRECT | GO:0045773--positive regulation of axon extension                                                                        | 4  | 1.6129<br>03226 | 0.0086<br>07483 | 9.36792<br>1897 |
| GOTERM_B<br>P_DIRECT | GO:0016477--cell migration                                              | 7 | 2.9914<br>52991 | 0.0264<br>34582 | 3.07835<br>7427 | GOTERM_B<br>P_DIRECT | GO:0030100--regulation of endocytosis                                                                                    | 4  | 1.6129<br>03226 | 0.0094<br>31518 | 9.06573<br>0868 |
| GOTERM_B<br>P_DIRECT | GO:0021762--substantia nigra development                                | 4 | 1.7094<br>01709 | 0.0265<br>88795 | 6.17466<br>446  | GOTERM_B<br>P_DIRECT | GO:0061024--membrane organization                                                                                        | 4  | 1.6129<br>03226 | 0.0103<br>00032 | 8.78242<br>6778 |
| GOTERM_B<br>P_DIRECT | GO:0000398--mRNA splicing, via spliceosome                              | 8 | 3.4188<br>03419 | 0.0278<br>548   | 2.72575<br>278  | GOTERM_B<br>P_DIRECT | GO:0016477--cell migration                                                                                               | 8  | 3.2258<br>06452 | 0.0113<br>26397 | 3.26787<br>9731 |

|                      |                                                       |   |                 |                 |                 |                      |                                                                              |    |                 |                 |                 |
|----------------------|-------------------------------------------------------|---|-----------------|-----------------|-----------------|----------------------|------------------------------------------------------------------------------|----|-----------------|-----------------|-----------------|
| GOTERM_B<br>P_DIRECT | GO:0031124--mRNA 3'-end processing                    | 4 | 1.7094<br>01709 | 0.0280<br>18646 | 6.05117<br>1171 | GOTERM_B<br>P_DIRECT | GO:0000902--cell morphogenesis                                               | 5  | 2.0161<br>29032 | 0.0115<br>5321  | 5.66608<br>1792 |
| GOTERM_B<br>P_DIRECT | GO:0007266--Rho protein signal transduction           | 4 | 1.7094<br>01709 | 0.0280<br>18646 | 6.05117<br>1171 | GOTERM_B<br>P_DIRECT | GO:0000165--MAPK cascade                                                     | 10 | 4.0322<br>58065 | 0.0126<br>31406 | 2.68165<br>7032 |
| GOTERM_B<br>P_DIRECT | GO:0072583--clathrin-mediated endocytosis             | 3 | 1.2820<br>51282 | 0.0280<br>37254 | 11.3459<br>4595 | GOTERM_B<br>P_DIRECT | GO:0048268--clathrin coat assembly                                           | 3  | 1.2096<br>77419 | 0.0140<br>7741  | 16.2137<br>1098 |
| GOTERM_B<br>P_DIRECT | GO:0097150--neuronal stem cell population maintenance | 3 | 1.2820<br>51282 | 0.0307<br>24268 | 10.8056<br>6281 | GOTERM_B<br>P_DIRECT | GO:0006446--regulation of translational initiation                           | 4  | 1.6129<br>03226 | 0.0142<br>26823 | 7.80660<br>1581 |
| GOTERM_B<br>P_DIRECT | GO:0006405--RNA export from nucleus                   | 4 | 1.7094<br>01709 | 0.0357<br>68246 | 5.50106<br>4701 | GOTERM_B<br>P_DIRECT | GO:0016337--single organismal cell-cell adhesion                             | 6  | 2.4193<br>54839 | 0.0144<br>61836 | 4.17382<br>6588 |
| GOTERM_B<br>P_DIRECT | GO:0050770--regulation of axonogenesis                | 3 | 1.2820<br>51282 | 0.0363<br>87814 | 9.86603<br>9953 | GOTERM_B<br>P_DIRECT | GO:0008360--regulation of cell shape                                         | 7  | 2.8225<br>80645 | 0.0148<br>2289  | 3.51297<br>0711 |
| GOTERM_B<br>P_DIRECT | GO:0006897--endocytosis                               | 6 | 2.5641<br>02564 | 0.0368<br>27728 | 3.26502<br>0416 | GOTERM_B<br>P_DIRECT | GO:0051016--barbed-end actin filament capping                                | 3  | 1.2096<br>77419 | 0.0162<br>71691 | 15.0555<br>8876 |
| GOTERM_B<br>P_DIRECT | GO:0048870--cell motility                             | 3 | 1.2820<br>51282 | 0.0393<br>58394 | 9.45495<br>4955 | GOTERM_B<br>P_DIRECT | GO:0006605--protein targeting                                                | 4  | 1.6129<br>03226 | 0.0176<br>55611 | 7.20609<br>3767 |
| GOTERM_B<br>P_DIRECT | GO:0030866--cortical actin cytoskeleton organization  | 3 | 1.2820<br>51282 | 0.0393<br>58394 | 9.45495<br>4955 | GOTERM_B<br>P_DIRECT | GO:1904874--positive regulation of telomerase RNA localization to Cajal body | 3  | 1.2096<br>77419 | 0.0186<br>01525 | 14.0518<br>8285 |
| GOTERM_B<br>P_DIRECT | GO:0060976--coronary vasculature development          | 3 | 1.2820<br>51282 | 0.0424<br>17645 | 9.07675<br>6757 | GOTERM_B<br>P_DIRECT | GO:0006418--tRNA aminoacylation for protein translation                      | 4  | 1.6129<br>03226 | 0.0188<br>91761 | 7.02594<br>1423 |
| GOTERM_B<br>P_DIRECT | GO:0030041--actin filament polymerization             | 3 | 1.2820<br>51282 | 0.0455<br>62742 | 8.72765<br>0728 | GOTERM_B<br>P_DIRECT | GO:0045184--establishment of protein localization                            | 4  | 1.6129<br>03226 | 0.0188<br>91761 | 7.02594<br>1423 |
| GOTERM_B<br>P_DIRECT | GO:0007067--mitotic nuclear division                  | 8 | 3.4188<br>03419 | 0.0466<br>41714 | 2.43998<br>8375 | GOTERM_B<br>P_DIRECT | GO:0050852--T cell receptor signaling pathway                                | 7  | 2.8225<br>80645 | 0.0189<br>80671 | 3.32308<br>0403 |
| GOTERM_B<br>P_DIRECT | GO:0001764--neuron migration                          | 5 | 2.1367<br>52137 | 0.0499<br>63326 | 3.60188<br>7602 | GOTERM_B<br>P_DIRECT | GO:0007015--actin filament organization                                      | 5  | 2.0161<br>29032 | 0.0191<br>08396 | 4.87912<br>5988 |
|                      |                                                       |   |                 |                 |                 | GOTERM_B<br>P_DIRECT | GO:0006886--intracellular protein transport                                  | 9  | 3.6290<br>32258 | 0.0192<br>98806 | 2.67938<br>4441 |
|                      |                                                       |   |                 |                 |                 | GOTERM_B<br>P_DIRECT | GO:0010592--positive regulation of lamellipodium assembly                    | 3  | 1.2096<br>77419 | 0.0210<br>62661 | 13.1736<br>4017 |
|                      |                                                       |   |                 |                 |                 | GOTERM_B<br>P_DIRECT | GO:0016192--vesicle-mediated transport                                       | 7  | 2.8225<br>80645 | 0.0213<br>31689 | 3.23563<br>0918 |

|  |  |  |  |  |  |                      |                                                                       |   |                 |                 |                 |
|--|--|--|--|--|--|----------------------|-----------------------------------------------------------------------|---|-----------------|-----------------|-----------------|
|  |  |  |  |  |  | GOTERM_B<br>P_DIRECT | GO:0016236~macroautophagy                                             | 5 | 2.0161<br>29032 | 0.0228<br>17514 | 4.62232<br>9883 |
|  |  |  |  |  |  | GOTERM_B<br>P_DIRECT | GO:1901216~positive regulation of neuron death                        | 3 | 1.2096<br>77419 | 0.0236<br>50941 | 12.3987<br>2016 |
|  |  |  |  |  |  | GOTERM_B<br>P_DIRECT | GO:0030838~positive regulation of actin filament polymerization       | 4 | 1.6129<br>03226 | 0.0257<br>754   | 6.24528<br>1265 |
|  |  |  |  |  |  | GOTERM_B<br>P_DIRECT | GO:0030705~cytoskeleton-dependent intracellular transport             | 3 | 1.2096<br>77419 | 0.0263<br>623   | 11.7099<br>0237 |
|  |  |  |  |  |  | GOTERM_B<br>P_DIRECT | GO:0035904~aorta development                                          | 3 | 1.2096<br>77419 | 0.0263<br>623   | 11.7099<br>0237 |
|  |  |  |  |  |  | GOTERM_B<br>P_DIRECT | GO:0035264~multicellular organism growth                              | 5 | 2.0161<br>29032 | 0.0269<br>36065 | 4.39121<br>3389 |
|  |  |  |  |  |  | GOTERM_B<br>P_DIRECT | GO:0006412~translation                                                | 9 | 3.6290<br>32258 | 0.0276<br>4802  | 2.49934<br>6751 |
|  |  |  |  |  |  | GOTERM_B<br>P_DIRECT | GO:0007018~microtubule-based movement                                 | 5 | 2.0161<br>29032 | 0.0280<br>30639 | 4.33700<br>0878 |
|  |  |  |  |  |  | GOTERM_B<br>P_DIRECT | GO:0032956~regulation of actin cytoskeleton organization              | 4 | 1.6129<br>03226 | 0.0288<br>56697 | 5.97952<br>4615 |
|  |  |  |  |  |  | GOTERM_B<br>P_DIRECT | GO:0071230~cellular response to amino acid stimulus                   | 4 | 1.6129<br>03226 | 0.0288<br>56697 | 5.97952<br>4615 |
|  |  |  |  |  |  | GOTERM_B<br>P_DIRECT | GO:0000266~mitochondrial fission                                      | 3 | 1.2096<br>77419 | 0.0291<br>9276  | 11.0935<br>9172 |
|  |  |  |  |  |  | GOTERM_B<br>P_DIRECT | GO:0051493~regulation of cytoskeleton organization                    | 3 | 1.2096<br>77419 | 0.0291<br>9276  | 11.0935<br>9172 |
|  |  |  |  |  |  | GOTERM_B<br>P_DIRECT | GO:0051603~proteolysis involved in cellular protein catabolic process | 4 | 1.6129<br>03226 | 0.0304<br>67285 | 5.85495<br>1185 |
|  |  |  |  |  |  | GOTERM_B<br>P_DIRECT | GO:0031424~keratinization                                             | 4 | 1.6129<br>03226 | 0.0304<br>67285 | 5.85495<br>1185 |
|  |  |  |  |  |  | GOTERM_B<br>P_DIRECT | GO:0030307~positive regulation of cell growth                         | 5 | 2.0161<br>29032 | 0.0314<br>71795 | 4.18210<br>799  |
|  |  |  |  |  |  | GOTERM_B<br>P_DIRECT | GO:0072583~clathrin-mediated endocytosis                              | 3 | 1.2096<br>77419 | 0.0321<br>3843  | 10.5389<br>1213 |



|  |  |  |  |  |  |                      |                                                                        |   |                 |                 |                 |
|--|--|--|--|--|--|----------------------|------------------------------------------------------------------------|---|-----------------|-----------------|-----------------|
|  |  |  |  |  |  | GOTERM_B<br>P_DIRECT | GO:000132~establishment of mitotic spindle orientation                 | 3 | 1.2096<br>77419 | 0.0351<br>95504 | 10.0370<br>5918 |
|  |  |  |  |  |  | GOTERM_B<br>P_DIRECT | GO:0038095~Fc-epsilon receptor signaling pathway                       | 7 | 2.8225<br>80645 | 0.0409<br>64101 | 2.76301<br>0672 |
|  |  |  |  |  |  | GOTERM_B<br>P_DIRECT | GO:0032487~regulation of Rap protein signal transduction               | 2 | 0.8064<br>51613 | 0.0419<br>22899 | 46.8396<br>0948 |
|  |  |  |  |  |  | GOTERM_B<br>P_DIRECT | GO:0090306~spindle assembly involved in meiosis                        | 2 | 0.8064<br>51613 | 0.0419<br>22899 | 46.8396<br>0948 |
|  |  |  |  |  |  | GOTERM_B<br>P_DIRECT | GO:0051383~kinetochore organization                                    | 2 | 0.8064<br>51613 | 0.0419<br>22899 | 46.8396<br>0948 |
|  |  |  |  |  |  | GOTERM_B<br>P_DIRECT | GO:0006614~SRP-dependent cotranslational protein targeting to membrane | 5 | 2.0161<br>29032 | 0.0446<br>65252 | 3.73720<br>2884 |
|  |  |  |  |  |  | GOTERM_B<br>P_DIRECT | GO:0048870~cell motility                                               | 3 | 1.2096<br>77419 | 0.0449<br>98357 | 8.78242<br>6778 |
|  |  |  |  |  |  | GOTERM_B<br>P_DIRECT | GO:0030866~cortical actin cytoskeleton organization                    | 3 | 1.2096<br>77419 | 0.0449<br>98357 | 8.78242<br>6778 |
|  |  |  |  |  |  | GOTERM_B<br>P_DIRECT | GO:0016049~cell growth                                                 | 4 | 1.6129<br>03226 | 0.0450<br>06179 | 5.01852<br>9588 |
|  |  |  |  |  |  | GOTERM_B<br>P_DIRECT | GO:0000086~G2/M transition of mitotic cell cycle                       | 6 | 2.4193<br>54839 | 0.0455<br>94478 | 3.07705<br>4638 |
|  |  |  |  |  |  | GOTERM_B<br>P_DIRECT | GO:0000209~protein polyubiquitination                                  | 7 | 2.8225<br>80645 | 0.0467<br>92751 | 2.67291<br>2498 |
|  |  |  |  |  |  | GOTERM_B<br>P_DIRECT | GO:0006897~endocytosis                                                 | 6 | 2.4193<br>54839 | 0.0479<br>96532 | 3.03278<br>047  |
|  |  |  |  |  |  | GOTERM_B<br>P_DIRECT | GO:0060976~coronary vasculature development                            | 3 | 1.2096<br>77419 | 0.0484<br>64657 | 8.43112<br>9707 |
|  |  |  |  |  |  | GOTERM_B<br>P_DIRECT | GO:0007569~cell aging                                                  | 3 | 1.2096<br>77419 | 0.0484<br>64657 | 8.43112<br>9707 |
|  |  |  |  |  |  | GOTERM_B<br>P_DIRECT | GO:0016055~Wnt signaling pathway                                       | 7 | 2.8225<br>80645 | 0.0498<br>90899 | 2.63003<br>1549 |
